# Supplementary material for: Selective Moonlighting Cell-Penetrating Peptides
Source: Pharmaceutics. 2021 Jul 22;13(8):1119. doi: 10.3390/pharmaceutics13081119 (PMC8400200; doi:10.3390/pharmaceutics13081119)

Supplemental Data for the work entitled "Selective Moonlighting Cell-Penetrating Peptides" by Rafael Morán-Torres, David A. Castillo González, Beatriz Aguilar Maldonado, Maria Luisa Durán-Pastén, Susana Castro-Obregon & Gabriel Del Rio

Figure S1. Original Western blots  
A) Neprilysin

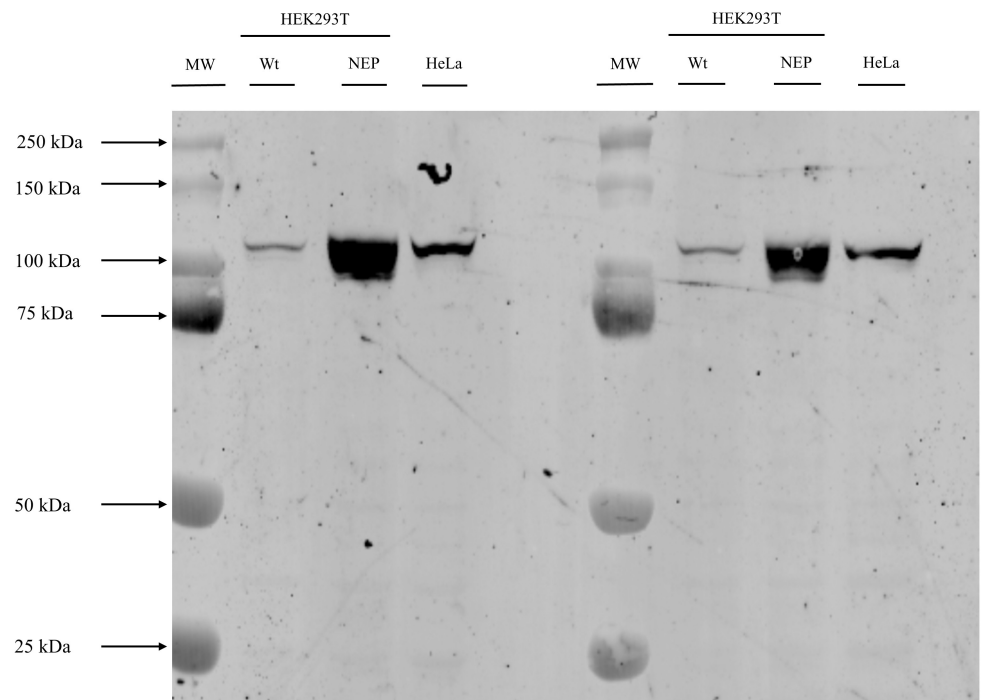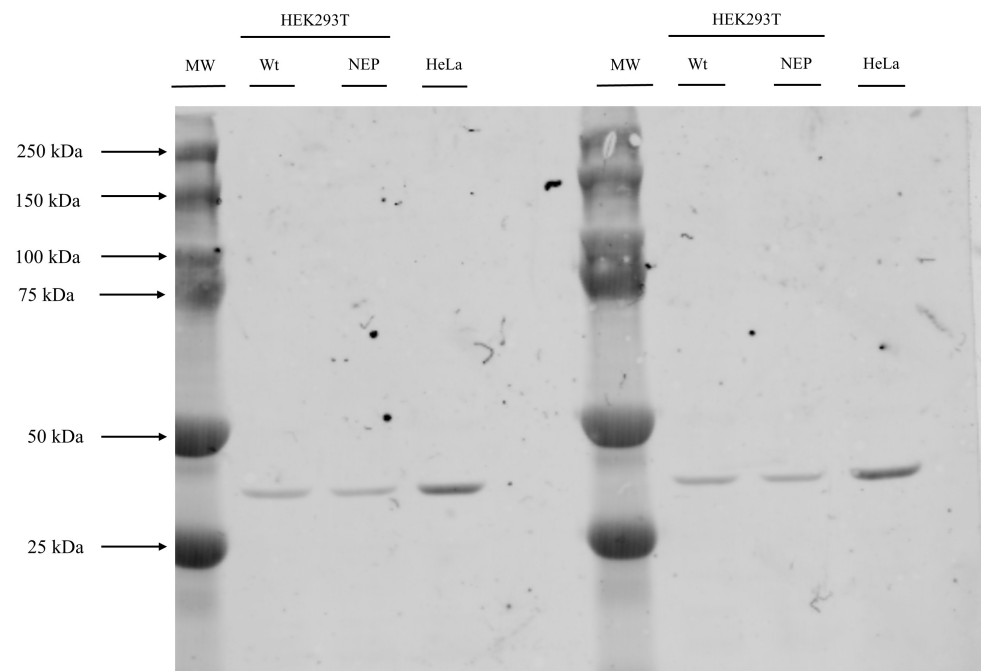

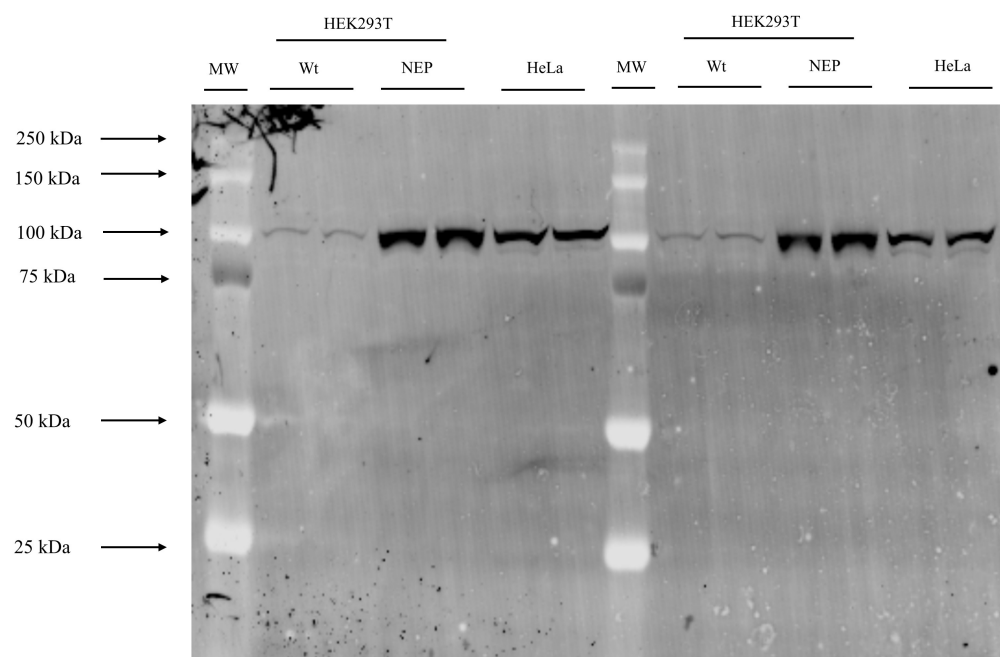

B) Actin

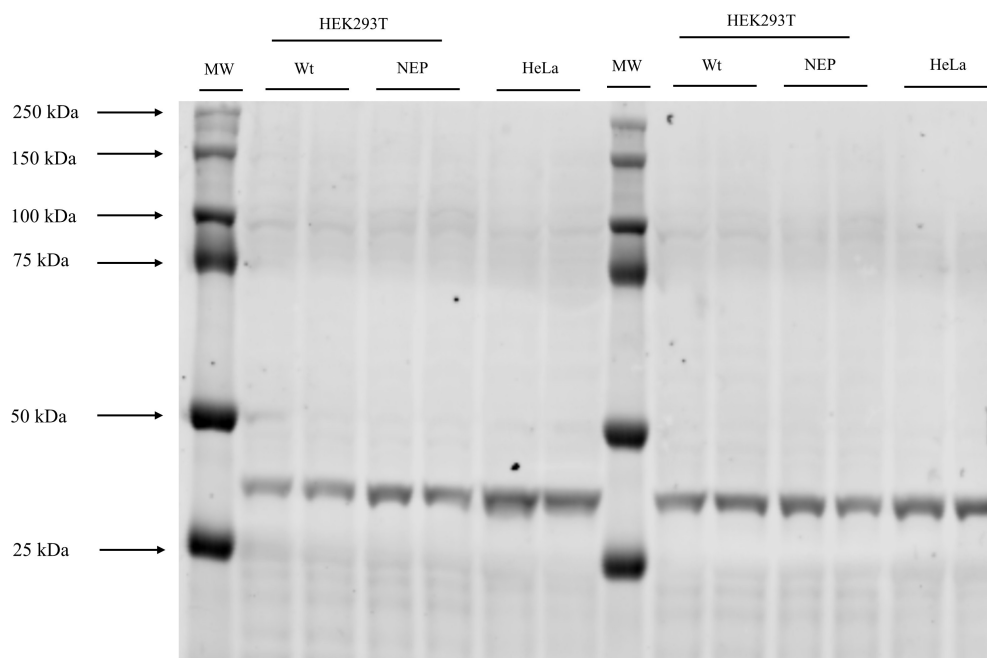

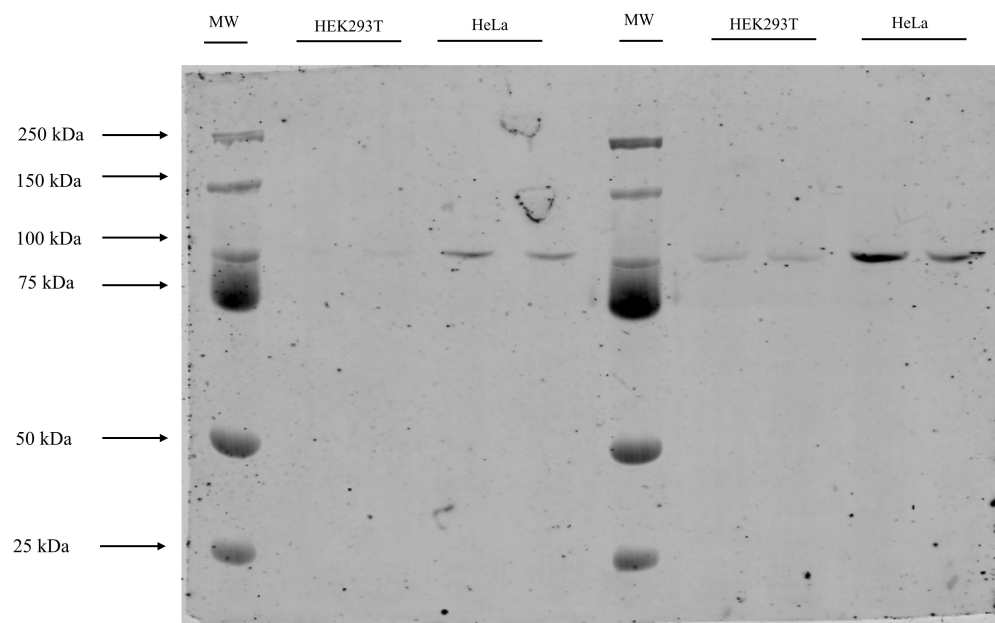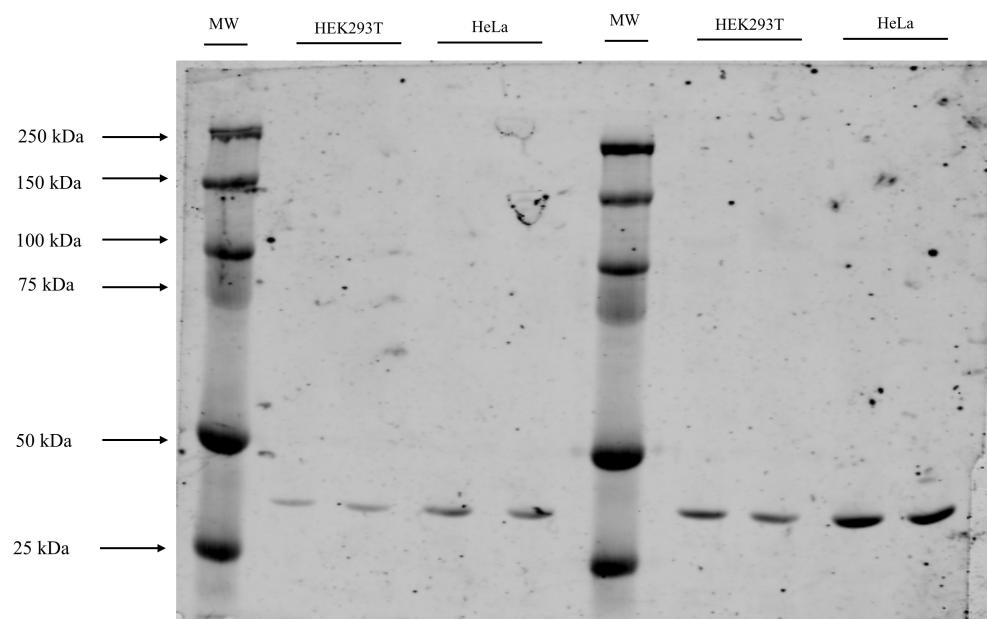

Supplement: Supplementary file 1 [file pharmaceutics-13-01119-s001.zip › FigureS1.pdf]
