# Supplementary material for: Selective Moonlighting Cell-Penetrating Peptides
Source: Pharmaceutics. 2021 Jul 22;13(8):1119. doi: 10.3390/pharmaceutics13081119 (PMC8400200; doi:10.3390/pharmaceutics13081119)
Supplement: Supplementary file 1 [file pharmaceutics-13-01119-s001.zip › TableS1.pdf]

Supplemental Data for the work entitled "Selective Moonlighting Cell-Penetrating Peptides" by Rafael Morán-Torres, David A. Castillo González, Beatriz Aguilar Maldonado, Maria Luisa Durán-Pastén, Susana Castro-Obregon & Gabriel Del Rio

Table S1 A) Intensity recorded for peptide alpha-NLS-C on MATa and MATalpha cells. MATa recordings correspond with odd Time numbers, and MATalpha with even Time numbers.

Time,GroupByColor,Intensity

1,1,14247.875000  
1,1,1647.575000  
1,1,7098.816667  
1,1,3319.325581  
1,1,1779.362903  
1,1,8738.350000  
1,1,2171.104167  
1,1,2083.425676  
1,1,7217.899194  
1,1,4002.988372  
1,1,7882.542857  
1,1,2563.000000  
1,1,3030.750000  
1,1,8553.037234  
1,1,4426.178977  
1,1,3087.338235  
1,1,6593.800000  
1,1,17387.866667  
1,1,5166.166667  
1,1,2083.000000  
1,1,7057.202206  
1,1,2469.600000  
1,1,1589.066176  
1,1,5495.152439  
1,1,6506.109375  
1,1,1523.029762  
1,1,7239.500000  
1,1,2060.246429  
1,1,9361.081081  
1,1,7108.888889  
1,1,4756.570513  
1,1,6631.312500  
1,1,2418.431818  
1,1,1698.750000  
1,1,15519.732143  
1,1,13709.125000  
1,1,2266.425532  
1,1,8009.590000  
1,1,1837.378676  
1,1,2055.694444  
1,1,7484.750000  
1,1,6357.156250  
1,1,9456.275568  
1,1,2205.179487  
1,1,14153.219512  
1,1,3626.600000  
1,1,1898.365741  
1,1,2238.217105  
1,1,5597.926136  
1,1,1853.882979  
1,1,13698.312500  
1,1,2240.994681  
1,1,18279.532143  
1,1,2010.230769  
1,1,7494.174242  
1,1,14093.000000  
1,1,9568.451613  
1,1,5507.676282  
1,1,7975.857955  
1,1,15793.387500  
1,1,8315.262500  
1,1,1791.955128

1,1,2716.000000  
1,1,2511.788462  
1,1,2115.669118  
1,1,18740.725000  
1,1,7565.316860  
1,1,2182.948529  
1,1,2178.980769  
1,1,1924.482143  
1,1,4255.060976  
1,1,1828.598684  
1,1,15769.325658  
1,1,6934.450000  
1,1,2352.076613  
1,1,1962.346939  
1,1,3099.323529  
1,1,3375.968750  
1,1,16948.528571  
1,1,2487.714286  
1,1,8101.250000  
1,1,1649.692308  
1,1,3810.353659  
1,1,5397.992647  
1,1,11325.978125  
1,1,11758.815789  
1,1,8961.423077  
1,1,3387.784722  
1,1,7485.086538  
1,1,16766.761628  
1,1,3439.562500  
1,1,4049.743750  
1,1,3429.527778  
1,1,15182.105000  
1,1,3645.558824  
1,1,4362.048387  
1,1,1525.479592  
1,1,10279.500000  
1,1,1505.016667  
1,1,2446.052885  
1,1,13189.223214  
1,1,2479.167969  
1,1,2838.462500  
1,1,2386.992647  
1,1,2698.398810  
1,1,1863.036765  
1,1,2541.793103  
1,1,5660.738095  
1,1,2155.243902  
1,1,3724.071429  
1,1,2738.336538  
1,1,5394.413793  
1,1,1690.993590  
1,1,5073.522727  
1,1,2786.322581  
1,1,11848.821429  
1,1,6748.758065  
1,1,5199.956081  
1,1,7713.282609  
1,1,1606.326087  
1,1,12209.250000  
1,1,2579.758929  
1,1,5943.546875  
1,1,1556.950000  
1,1,1602.912500  
1,1,6483.154891  
1,1,8184.753676  
1,1,9320.048387

1,1,6400.496429  
1,1,2829.000000  
1,1,3592.735294  
1,1,7163.120370  
1,1,7679.971774  
1,1,15572.229730  
1,1,2650.788462  
1,1,5094.794643  
1,1,7783.705882  
1,1,4963.363095  
1,1,4547.048780  
1,1,2126.925000  
1,1,5642.546875  
1,1,2265.073529  
1,1,2598.375000  
1,1,1644.189286  
1,1,4123.141667  
1,1,2588.918750  
1,1,3916.935484  
1,1,5871.685484  
1,1,7760.155405  
1,1,1646.593750  
1,1,4918.659375  
1,1,4584.518939  
1,1,8084.775000  
1,1,7928.187500  
1,1,1628.550000  
1,1,7036.445946  
1,1,6762.682927  
1,1,3981.372093  
1,1,15185.098837  
1,1,1724.363636  
1,1,1936.337500  
1,1,9547.418103  
1,1,2545.613636  
1,1,4999.650000  
1,1,1683.535714  
1,1,2051.167763  
1,1,6563.525000  
1,1,2591.846154  
1,1,7586.195652  
1,1,2238.055921  
1,1,3527.174419  
1,1,1903.822368  
1,1,6981.868421  
1,1,4049.722656  
1,1,14347.187500  
1,1,3098.727273  
1,1,1798.634409  
1,1,2784.369565  
1,1,7170.892857  
1,1,2010.441667  
1,1,8118.254310  
1,1,2154.667683  
1,1,7196.090909  
1,1,3528.519231  
1,1,1666.350000  
1,1,13189.934783  
1,1,14167.958333  
1,1,7860.440000  
1,1,1506.055147  
1,1,5375.500000  
1,1,7949.525000  
1,1,7938.545455  
1,1,8818.605769  
1,1,2510.529412

1,1,13335.193182  
1,1,1715.756579  
1,1,7507.000000  
1,1,15408.147059  
1,1,2220.401515  
1,1,2255.233108  
1,1,3183.364865  
1,1,2436.703488  
1,1,8040.500000  
1,1,6285.892857  
1,1,6222.300000  
1,1,1708.881250  
1,1,5492.093750  
1,1,1709.115132  
1,1,4334.910000  
1,1,15052.585714  
1,1,8140.263514  
1,1,8385.421875  
1,1,3333.500000  
1,1,4767.818182  
1,1,8177.114362  
1,1,1848.570652  
1,1,3181.138158  
1,1,5553.488636  
1,1,3712.875000  
1,1,6430.046875  
1,1,3583.411932  
1,1,2756.982143  
1,1,1644.068750  
1,1,1821.263158  
1,1,2298.598958  
1,1,1508.105263  
1,1,3540.586207  
1,1,1574.600000  
1,1,1583.085714  
1,1,14157.966346  
1,1,2206.252841  
1,1,2139.404762  
1,1,14504.222222  
1,1,14509.187500  
1,1,1847.635000  
1,1,1724.500000  
1,1,9104.667614  
1,1,2331.573529  
1,1,3389.948718  
1,1,12521.742188  
1,1,2755.824324  
1,1,4740.135714  
1,1,3059.428571  
1,1,9496.490385  
1,1,8009.655612  
1,1,10157.640000  
1,1,13692.295455  
1,1,7186.995192  
1,1,6489.350446  
1,1,2560.020270  
1,1,12070.375000  
1,1,1852.765625  
1,1,2228.464286  
1,1,2412.445122  
1,1,5051.075000  
1,1,6216.365385  
1,1,5640.125000  
1,1,5379.715426  
1,1,7821.125000  
1,1,2197.333333

1,1,14235.151163  
1,1,17983.600000  
1,1,1595.835938  
1,1,1532.397222  
1,1,10717.786207  
1,1,2026.475000  
1,1,7426.512195  
1,1,4179.545455  
1,1,12756.187500  
1,1,4566.628125  
1,1,16494.468085  
1,1,4570.883721  
1,1,18125.261364  
1,1,7753.525000  
1,1,5747.000000  
1,1,18868.250000  
1,1,2470.160714  
1,1,7666.788462  
1,1,6171.063830  
1,1,5344.000000  
1,1,6452.525000  
1,1,15938.178571  
1,1,10413.750000  
1,1,6471.395833  
1,1,2632.644737  
1,1,6995.160714  
1,1,5592.605469  
1,1,1684.904412  
1,1,1931.155488  
1,1,7833.730263  
1,1,3270.772727  
1,1,2739.437500  
1,1,3216.850746  
1,1,3895.862500  
1,1,12697.042763  
1,1,3353.343750  
1,1,4994.722973  
1,1,4216.952703  
1,1,1923.463415  
1,1,3400.750000  
1,1,1993.070946  
1,1,1553.460123  
1,1,2084.144737  
1,1,8015.577586  
1,1,15908.150000  
1,1,5014.947674  
1,1,3145.488095  
1,1,3632.250000  
1,1,8191.926829  
1,1,8927.944767  
1,1,3113.892857  
1,1,3499.869186  
1,1,3120.552147  
1,1,7782.056818  
1,1,3921.197917  
1,1,18904.880952  
1,1,2317.375000  
1,1,1602.300676  
1,1,1716.209459  
1,1,2051.903846  
1,1,15765.642857  
1,1,1859.503289  
1,1,6561.811321  
1,1,2336.500000  
1,1,5587.433333  
1,1,5088.523438

1,1,4654.217105  
1,1,2947.500000  
1,1,4322.290441  
1,1,15977.188953  
1,1,2042.000000  
1,1,3711.866667  
1,1,3977.400000  
1,1,1506.040816  
1,1,7338.948718  
1,1,2986.636364  
1,1,8185.150000  
1,1,6859.340116  
1,1,9644.891447  
1,1,2694.568627  
1,1,2638.771429  
1,1,7010.461538  
1,1,6356.320000  
1,1,10922.535714  
1,1,4731.503676  
1,1,13509.980263  
1,1,9815.966912  
1,1,7924.444444  
1,1,18896.961538  
1,1,7475.098485  
1,1,2867.203125  
1,1,18134.426136  
1,1,7755.169643  
1,1,2278.634868  
1,1,13926.643939  
1,1,16215.357639  
1,1,4812.522959  
1,1,1767.600000  
1,1,6605.640306  
1,1,1637.125000  
1,1,7296.724138  
1,1,7031.338068  
1,1,2082.823529  
1,1,1578.416667  
1,1,2774.153846  
1,1,3037.263021  
1,1,3669.852941  
1,1,7110.166667  
1,1,6875.454545  
1,1,5341.637755  
1,1,6555.894737  
1,1,3096.399038  
1,1,3955.921053  
1,1,5677.744681  
1,1,2155.947368  
1,1,6174.064516  
1,1,6821.262821  
1,1,3625.421875  
1,1,2813.850610  
1,1,1697.380435  
1,1,1596.036765  
1,1,5469.664286  
1,1,8829.125000  
1,1,2913.887500  
1,1,4341.322917  
1,1,2645.461957  
1,1,13612.829082  
1,1,6849.406250  
1,1,10508.000000  
1,1,1853.185000  
1,1,8644.057692  
1,1,7840.733333

1,1,5976.357143  
1,1,5305.163462  
1,1,17093.102941  
1,1,6984.277778  
1,1,2926.783854  
1,1,2085.643293  
1,1,2114.000000  
1,1,1569.508929  
1,1,2112.218750  
1,1,2941.170000  
1,1,2648.480769  
1,1,9376.225000  
1,1,4939.400000  
1,1,13160.148148  
1,1,16881.750000  
1,1,4911.153846  
1,1,1537.109756  
1,1,2036.380952  
1,1,1678.392045  
1,1,14299.598214  
1,1,3511.704167  
1,1,8066.265152  
1,1,8175.710938  
1,1,3313.716463  
1,1,10544.240000  
1,1,7974.000000  
1,1,1717.024390  
1,1,2110.700581  
1,1,7458.156250  
1,1,4232.130952  
1,1,4285.858696  
1,1,7401.600962  
1,1,3739.669643  
1,1,1906.310976  
1,1,9062.474194  
1,1,3456.625000  
1,1,2304.300781  
1,1,9161.882353  
1,1,16086.671053  
1,1,7412.554348  
1,1,10977.822581  
1,1,1606.964286  
1,1,7934.602273  
1,1,12740.555556  
1,1,7753.937500  
1,1,3945.692308  
1,1,2961.863281  
1,1,1998.875000  
1,1,14669.500000  
1,1,5543.958333  
1,1,3609.650000  
1,1,7896.442857  
1,1,2321.614865  
1,1,8551.000000  
1,1,3773.150000  
1,1,3248.562500  
1,1,2008.721154  
1,1,7282.711538  
1,1,7856.592391  
1,1,3459.062500  
1,1,1777.780303  
1,1,7575.671875  
1,1,7012.875000  
1,1,10133.673913  
1,1,5522.607143  
1,1,2062.772959

1,1,1788.000000  
1,1,1820.041667  
1,1,1802.888889  
1,1,1756.000000  
1,1,2027.820513  
1,1,19454.243750  
1,1,1737.877717  
1,1,4572.375000  
1,1,4177.171875  
1,1,8534.343750  
1,1,1926.050481  
1,1,2374.968023  
1,1,6793.217391  
1,1,3111.214286  
1,1,16716.129032  
1,1,13619.944444  
1,1,9105.993421  
1,1,15305.450000  
1,1,2186.201923  
1,1,4088.976190  
1,1,6196.946970  
1,1,7956.211538  
1,1,3284.500000  
1,1,1558.442308  
1,1,5527.569149  
1,1,4135.669118  
1,1,7058.343750  
1,1,5524.709375  
1,1,7749.055556  
1,1,13344.988636  
1,1,8139.817857  
1,1,14218.872222  
1,1,7476.816667  
1,1,3282.359375  
1,1,8638.076389  
1,1,11349.704545  
1,1,11294.812500  
1,1,4389.381579  
1,1,1721.583333  
1,1,1678.229167  
1,1,2159.581522  
1,1,16664.825000  
1,1,16648.122093  
1,1,2003.476744  
1,1,2304.329787  
1,1,2624.100000  
1,1,3370.477273  
1,1,18365.923077  
1,1,7211.928125  
1,1,3541.357143  
1,1,2755.262097  
1,1,14774.940000  
1,1,2548.298387  
1,1,17307.690000  
1,1,4378.750000  
1,1,3668.608696  
1,1,19253.078947  
1,1,1600.793103  
1,1,3881.362500  
1,1,3053.306548  
1,1,4744.750000  
1,1,2410.394737  
1,1,14977.006757  
1,1,4654.578947  
1,1,3611.130435  
1,1,4042.333333

1,1,13233.907407  
1,1,2327.177778  
1,1,2247.551136  
1,1,2737.887019  
1,1,6937.380682  
1,1,2268.875000  
1,1,3010.318182  
1,1,5538.812500  
1,1,14116.234848  
1,1,1697.053922  
1,1,7619.955556  
1,1,2599.261628  
1,1,2273.100000  
1,1,3318.804878  
1,1,5694.875000  
1,1,4580.444444  
1,1,14315.125000  
1,1,6192.190476  
1,1,17200.663043  
1,1,8064.798077  
1,1,2949.676136  
1,1,1555.411765  
1,1,2362.692308  
1,1,4487.523438  
1,1,6966.147727  
1,1,5402.025568  
1,1,6039.375000  
1,1,1793.144022  
1,1,2453.920732  
1,1,2657.948718  
1,1,2081.963415  
1,1,1930.083333  
1,1,2237.800000  
1,1,3521.176829  
1,1,4355.295455  
1,1,2838.226563  
1,1,5336.902027  
1,1,5349.281863  
1,1,5430.872222  
1,1,5085.727273  
1,1,4863.681818  
1,1,2096.975543  
1,1,1741.800000  
1,1,7481.894231  
1,1,5305.512500  
1,1,7711.209677  
1,1,1770.908537  
1,1,8891.363636  
1,1,18282.107143  
1,1,7476.607143  
1,1,4240.252841  
1,1,7681.000000  
1,1,16507.844660  
1,1,3696.303977  
1,1,2721.768293  
1,1,3787.848168  
1,1,2092.458333  
1,1,6153.428571  
1,1,4904.062500  
1,1,3781.356383  
1,1,3767.357558  
1,1,3441.750000  
1,1,5393.381098  
1,1,1819.630814  
1,1,1597.892857  
1,1,2222.302083

1,1,3489.188312  
1,1,10452.512097  
1,1,2655.247283  
1,1,7789.090517  
1,1,2104.466463  
1,1,7837.645833  
1,1,8225.733333  
1,1,13044.875000  
1,1,7137.166667  
1,1,6456.924419  
1,1,9311.854167  
1,1,2702.803571  
1,1,2044.444767  
1,1,2212.564103  
1,1,3342.954545  
1,1,14548.680556  
1,1,1862.906977  
1,1,17845.625000  
1,1,1574.605000  
1,1,14650.253289  
1,1,3584.046053  
1,1,3311.703488  
1,1,1767.321875  
1,1,1705.175000  
1,1,3696.075000  
1,1,2531.437500  
1,1,2703.520833  
1,1,2581.608491  
1,1,5230.170455  
1,1,1719.115741  
1,1,5640.400000  
1,1,5357.785714  
1,1,2881.352941  
1,1,1935.446809  
1,1,2433.121951  
1,1,2212.416667  
1,1,3853.285714  
1,1,17423.568182  
1,1,2876.480769  
1,1,5098.540541  
1,1,15884.996711  
1,1,3228.664634  
1,1,3153.053191  
1,1,14168.607143  
1,1,13531.222222  
1,1,8419.526786  
1,1,12486.750000  
1,1,2875.302326  
1,1,1685.966667  
1,1,3014.846154  
1,1,2243.416667  
1,1,3233.875000  
1,1,1762.591216  
1,1,2491.488372  
1,1,5070.113208  
1,1,10635.250000  
1,1,10206.559375  
1,1,7730.661290  
1,1,2110.615385  
1,1,10123.381757  
1,1,2539.187500  
1,1,1750.625000  
1,1,2008.229167  
1,1,4218.178977  
1,1,4752.622222  
1,1,14687.875000

1,1,2194.833333  
1,1,14991.125000  
1,1,1810.991935  
1,1,7644.327586  
1,1,6233.137755  
1,1,6312.761905  
1,1,3042.810976  
1,1,10991.867188  
1,1,17997.050676  
1,1,6438.880000  
1,1,3541.712500  
1,1,1672.768750  
1,1,2769.000000  
1,1,4412.182432  
1,1,2561.532051  
1,1,8434.358333  
1,1,3163.833333  
1,1,1727.698529  
1,1,6724.898438  
1,1,1679.778571  
1,1,1816.483333  
1,1,15081.593750  
1,1,15837.106250  
1,1,7699.529412  
1,1,1973.750000  
1,1,2092.048295  
1,1,5523.812500  
1,1,13987.180921  
1,1,12510.819149  
1,1,1551.585987  
1,1,1550.552632  
1,1,7039.338889  
1,1,4784.325000  
1,1,4133.768382  
1,1,10012.043478  
1,1,2343.217500  
1,1,2452.162791  
1,1,2279.140625  
1,1,7972.865385  
1,1,3456.156250  
1,1,2204.882353  
1,1,10891.109043  
1,1,2191.325000  
1,1,6916.145833  
1,1,4958.531746  
1,1,2130.544118  
1,1,3622.590426  
1,1,7919.900000  
1,1,15389.544118  
1,1,4748.787234  
1,1,19661.250000  
1,1,4057.995833  
1,1,10676.587500  
1,1,7827.315217  
1,1,1633.486842  
1,1,4052.500000  
1,1,4575.316176  
1,1,4442.223214  
1,1,7736.630435  
1,1,17941.323980  
1,1,7685.931818  
1,1,2863.937500  
1,1,4940.209302  
1,1,7345.338710  
1,1,14766.729167  
1,1,14811.625000

1,1,2448.576087  
1,1,4947.854167  
1,1,12302.987500  
1,1,2505.583333  
1,1,5518.428571  
1,1,1717.079545  
1,1,1919.229730  
1,1,12055.500000  
1,1,7454.568182  
1,1,1919.601562  
1,1,2049.889423  
1,1,13583.400000  
1,1,4238.393162  
1,1,2165.881410  
1,1,13622.201923  
1,1,3933.406250  
1,1,2155.000000  
1,1,2514.534574  
1,1,6234.607143  
1,1,1888.301471  
1,1,2243.435484  
1,1,8085.528846  
1,1,2395.482955  
1,1,4931.812500  
1,1,10334.288462  
1,1,2195.826923  
1,1,2017.500000  
1,1,5146.239583  
1,1,2496.082192  
1,1,4865.142857  
1,1,1835.405488  
1,1,4057.125000  
1,1,2113.461538  
1,1,7332.159375  
1,1,2261.311047  
1,1,1570.258929  
1,1,2417.119565  
1,1,5712.356383  
1,1,2168.950000  
1,1,5530.996528  
1,1,2699.593750  
1,1,3269.875000  
1,1,2184.311111  
1,1,1903.675000  
1,1,1673.354167  
1,1,2815.541667  
1,1,15770.636364  
1,1,5084.321429  
1,1,3959.545455  
1,1,3964.682692  
1,1,7279.402778  
1,1,2984.525641  
1,1,7647.000000  
1,1,6547.394737  
1,1,5392.475000  
1,1,4305.700000  
1,1,6387.120000  
1,1,4499.125000  
1,1,7242.000000  
1,1,8630.789634  
1,1,7100.159722  
1,1,6291.948276  
1,1,3179.262195  
1,1,2280.992188  
1,1,5535.250000  
1,1,1566.315217

1,1,2544.713542  
1,1,5884.617021  
1,1,3206.947917  
1,1,1941.392857  
1,1,8660.397059  
1,1,1634.215909  
1,1,7260.060000  
1,1,10211.359281  
1,1,5020.580882  
1,1,1820.377778  
1,1,5946.625000  
1,1,5517.359756  
1,1,3114.737500  
1,1,6079.803571  
1,1,16326.911765  
1,1,5470.767045  
1,1,3893.734375  
1,1,9396.313953  
1,1,4879.017857  
1,1,2393.467391  
1,1,1871.159091  
1,1,2691.451613  
1,1,5400.636029  
1,1,18151.677083  
1,1,1761.642857  
1,1,2175.245370  
1,1,2410.000000  
1,1,2035.148936  
1,1,7787.725000  
1,1,1637.615385  
1,1,4250.883929  
1,1,6722.782738  
1,1,7260.267500  
1,1,7984.480769  
1,1,4903.155172  
1,1,1626.689516  
1,1,2922.382653  
1,1,5915.801471  
1,1,19340.166667  
1,1,2450.420455  
1,1,19381.767442  
1,1,7964.844828  
1,1,3513.609756  
1,1,4576.593137  
1,1,1655.045455  
1,1,1523.532500  
1,1,5423.947917  
1,1,1571.380952  
1,1,1666.750000  
1,1,5541.206250  
1,1,9892.733333  
1,1,12815.357143  
1,1,3294.960938  
1,1,10808.259615  
1,1,14196.693548  
1,1,2124.414634  
1,1,10056.750000  
1,1,6311.972222  
1,1,6717.846429  
1,1,4292.513393  
1,1,6606.247283  
1,1,2853.723404  
1,1,1920.869565  
1,1,2226.414894  
1,1,3881.903846  
1,1,1751.381579

1,1,2163.357143  
1,1,3328.800000  
1,1,3224.800000  
1,1,11350.411111  
1,1,1903.676630  
1,1,2429.748466  
1,1,13722.140625  
1,1,1795.554054  
1,1,2215.517857  
1,1,1590.958333  
1,1,2853.726064  
1,1,3020.090909  
1,1,3434.160959  
1,1,2126.280488  
1,1,1900.496622  
1,1,2013.538462  
1,1,2997.676471  
1,1,6539.125000  
1,1,4148.794444  
1,1,7030.500000  
1,1,1858.330000  
1,1,13534.274194  
1,1,1810.982143  
1,1,5338.333333  
1,1,5425.486842  
1,1,2895.279412  
1,1,1972.900000  
1,1,3325.216216  
1,1,9620.852941  
1,1,13891.925000  
1,1,1625.054487  
1,1,3978.944444  
1,1,2305.160714  
1,1,1841.951613  
1,1,4408.712121  
1,1,1815.625000  
1,1,5036.535714  
1,1,3701.720000  
1,1,2395.034014  
1,1,7233.257143  
1,1,2077.769231  
1,1,1977.611111  
1,1,2324.400000  
1,1,15404.709459  
1,1,2232.989130  
1,1,2336.336538  
1,1,4396.357955  
1,1,3787.375000  
1,1,9836.406250  
1,1,3952.891892  
1,1,5088.181818  
1,1,1860.431818  
1,1,5136.529412  
1,1,4205.255814  
1,1,13167.444444  
1,1,1771.458333  
1,1,7956.750000  
1,1,2960.884375  
1,1,6417.995000  
1,1,2207.000000  
1,1,3524.679487  
1,1,10523.503378  
1,1,1752.359043  
1,1,2437.441860  
1,1,2326.625000  
1,1,4590.527027

1,1,1720.543919  
1,1,8527.826087  
1,1,4389.625000  
1,1,11264.500000  
1,1,6883.625000  
1,1,19616.833333  
1,1,13735.548077  
1,1,2276.393617  
1,1,5743.418605  
1,1,2569.695652  
1,1,2667.684028  
1,1,3600.478261  
1,1,3582.000000  
1,1,4081.750000  
1,1,1825.020833  
1,1,8192.433036  
1,1,4202.933824  
1,1,1900.500000  
1,1,15081.416667  
1,1,3985.221939  
1,1,2416.687500  
1,1,2771.375000  
1,1,4352.839286  
1,1,4843.776316  
1,1,8764.850000  
1,1,3788.379808  
1,1,14158.790179  
1,1,1848.900000  
1,1,8979.210526  
1,1,7247.992188  
1,1,3125.859694  
1,1,1956.048295  
1,1,3324.889706  
1,1,7784.937500  
1,1,5876.609375  
1,1,4844.381944  
1,1,14485.404605  
1,1,2762.277344  
1,1,2819.812500  
1,1,1617.862805  
1,1,2907.792969  
1,1,1751.025735  
1,1,5175.327500  
1,1,1677.078125  
1,1,2036.804878  
1,1,7298.518519  
1,1,5103.281977  
1,1,7039.075472  
1,1,4411.760417  
1,1,2672.635714  
1,1,5733.292683  
1,1,10364.518519  
1,1,3990.000000  
1,1,11524.531250  
1,1,1695.198980  
1,1,11339.502976  
1,1,2060.250000  
1,1,1565.781250  
1,1,12806.526316  
1,1,1613.982955  
1,1,15861.259615  
1,1,5429.267045  
1,1,3630.007653  
1,1,17579.837838  
1,1,14258.333333  
1,1,7126.375000

1,1,2951.229167  
1,1,4086.244681  
1,1,12672.031250  
1,1,1507.375000  
1,1,11249.940000  
1,1,3418.000000  
1,1,6300.411932  
1,1,2386.554487  
1,1,1910.883721  
1,1,1609.719388  
1,1,11540.375000  
1,1,3121.502778  
1,1,13189.645833  
1,1,1845.131098  
1,1,1531.218750  
1,1,1652.613636  
1,1,12609.767857  
1,1,1984.655405  
1,1,7728.666667  
1,1,4255.652778  
1,1,7123.500000  
1,1,2255.500000  
1,1,3391.783019  
1,1,4050.476562  
1,1,2472.052083  
1,1,8117.958333  
1,1,7583.000000  
1,1,3148.600000  
1,1,7787.851351  
1,1,9378.727273  
1,1,7937.232143  
1,1,15754.083333  
1,1,10917.160156  
1,1,1862.765244  
1,1,11199.411765  
1,1,7563.344444  
1,1,7923.246528  
1,1,2733.982143  
1,1,1658.461538  
1,1,10506.092857  
1,1,6180.725000  
1,1,3556.025000  
1,1,2628.372283  
1,1,2576.386364  
1,1,17997.069767  
1,1,1822.900000  
1,1,4031.221774  
1,1,13303.212500  
1,1,1637.367347  
1,1,3590.075000  
1,1,2571.321429  
1,1,2137.585938  
1,1,12398.764205  
1,1,2418.860465  
1,1,6949.131944  
1,1,7110.257576  
1,1,2261.552083  
1,1,10051.011364  
1,1,1636.750000  
1,1,12771.200000  
1,1,3698.026596  
1,1,9238.968750  
1,1,7276.100000  
1,1,6206.343750  
1,1,8369.408333  
1,1,7257.951613

1,1,3271.250000  
1,1,7883.769531  
1,1,1820.420732  
1,1,2741.492188  
1,1,12359.717949  
1,1,7746.200000  
1,1,4305.875000  
1,1,19168.779412  
1,1,3288.576389  
1,1,2889.628788  
1,1,7958.531250  
1,1,8877.746324  
1,1,6400.583333  
1,1,1521.000000  
1,1,2789.256757  
1,1,3062.397727  
1,1,3049.292969  
1,1,10617.125000  
1,1,9836.390244  
1,1,19915.421053  
1,1,4825.875000  
1,1,14741.506098  
1,1,5355.869565  
1,1,11655.409091  
1,1,3212.881944  
1,1,4436.872222  
1,1,5878.220930  
1,1,10576.592593  
1,1,3429.607143  
1,1,2619.703125  
1,1,1839.210366  
1,1,2192.677083  
1,1,3611.250000  
1,1,2559.750000  
1,1,13142.314189  
1,1,2779.857143  
1,1,10728.336957  
1,1,1988.380952  
1,1,15219.000000  
1,1,4547.053571  
1,1,3740.218750  
1,1,2079.651163  
1,1,14338.571429  
1,1,3302.132353  
1,1,13387.517857  
1,1,1501.568182  
1,1,3767.687500  
1,1,13609.000000  
1,1,7417.472222  
1,1,6895.721154  
1,1,13420.506250  
1,1,8786.143617  
1,1,1509.000000  
1,1,7277.479839  
1,1,2240.275568  
1,1,1985.058824  
1,1,2520.329268  
1,1,4033.635638  
1,1,7576.000000  
1,1,1667.062500  
1,1,11225.936047  
1,1,14902.418605  
1,1,2298.769231  
1,1,3632.869318  
1,1,3551.984756  
1,1,3821.410714

1,1,16597.127907  
1,1,1681.413462  
1,1,2919.983553  
1,1,13257.942568  
1,1,4615.939103  
1,1,3774.012500  
1,1,4874.533537  
1,1,2222.125000  
1,1,6033.147059  
1,1,3202.023810  
1,1,8596.083333  
1,1,3910.526786  
1,1,14805.985714  
1,1,7807.388889  
1,1,1507.000000  
1,1,1604.475000  
1,1,6020.128378  
1,1,5256.000000  
1,1,2121.962209  
1,1,9967.916667  
1,1,15385.405488  
1,1,5477.394231  
1,1,7689.285156  
1,1,12008.218750  
1,1,1827.303571  
1,1,2544.003205  
1,1,6785.580556  
1,1,6669.685345  
1,1,3673.277778  
1,1,14354.825521  
1,1,4565.303191  
1,1,3024.031250  
1,1,2602.202778  
1,1,18747.348214  
1,1,11095.437500  
1,1,3666.970588  
1,1,3502.906250  
1,1,12770.472561  
1,1,3336.412500  
1,1,3383.350000  
1,1,1921.985294  
1,1,3408.867188  
1,1,1628.561170  
1,1,2273.835227  
1,1,1721.238971  
1,1,1935.021739  
1,1,1691.772727  
1,1,5467.218750  
1,1,2460.578125  
1,1,6745.710000  
1,1,12561.733108  
1,1,1933.982517  
1,1,13369.777778  
1,1,19119.654167  
1,1,9475.043750  
1,1,4998.041667  
1,1,5452.851695  
1,1,8089.212500  
1,1,15446.521552  
1,1,11713.000000  
1,1,2478.522727  
1,1,3570.719697  
1,1,2012.250000  
1,1,5178.510870  
1,1,3841.913462  
1,1,2817.348837

1,1,8044.790541  
1,1,2115.783537  
1,1,5267.615385  
1,1,1826.401316  
1,1,6484.302326  
1,1,7816.707317  
1,1,1501.146597  
1,1,8998.944444  
1,1,8237.401316  
1,1,4451.857143  
1,1,1920.580357  
1,1,11937.285714  
1,1,4618.812500  
1,1,6600.263158  
1,1,3440.357500  
1,1,4069.012500  
1,1,2195.762500  
1,1,5706.716216  
1,1,4251.798913  
1,1,8398.244565  
1,1,3381.283784  
1,1,2183.596774  
1,1,3133.395833  
1,1,19995.265625  
1,1,2573.043478  
1,1,3629.923295  
1,1,7950.666667  
1,1,1595.059028  
1,1,3289.539474  
1,1,7048.736842  
1,1,2274.867347  
1,1,3119.136628  
1,1,5985.255435  
1,1,4246.101744  
1,1,8024.975000  
1,1,3370.986842  
1,1,1976.916667  
1,1,2408.028571  
1,1,1529.956019  
1,1,1563.460938  
1,1,11500.696429  
1,1,1855.500000  
1,1,1614.127717  
1,1,2267.181034  
1,1,8204.228125  
1,1,2585.387821  
1,1,3097.815789  
1,1,11000.066667  
1,1,1942.615385  
1,1,14215.390957  
1,1,7400.115385  
1,1,2569.956522  
1,1,7598.207031  
1,1,7878.537500  
1,1,5350.298913  
1,1,6458.796053  
1,1,15223.000000  
1,1,3299.222222  
1,1,1670.588235  
1,1,1527.212121  
1,1,1705.090909  
1,1,4168.246711  
1,1,1885.085106  
1,1,7206.825000  
1,1,6675.083333  
1,1,5401.459459

1,1,3829.671196  
1,1,7102.980263  
1,1,2597.570312  
1,1,1979.875000  
1,1,2289.883721  
1,1,5756.153409  
1,1,1890.388587  
1,1,2852.250000  
1,1,2553.260638  
1,1,9789.988095  
1,1,2837.750000  
1,1,1714.621528  
1,1,4574.640625  
1,1,5474.516667  
1,1,4172.144737  
1,1,1596.944853  
1,1,2300.303571  
1,1,2411.951220  
1,1,7066.906250  
1,1,2201.875000  
1,1,1907.383721  
1,1,3131.642857  
1,1,4477.195652  
1,1,3773.644737  
1,1,1572.800000  
1,1,2341.404412  
1,1,4147.097561  
1,1,13660.204787  
1,1,7762.546053  
1,1,7374.909091  
1,1,2426.980263  
1,1,9919.867647  
1,1,5227.714744  
1,1,10757.523810  
1,1,1572.076087  
1,1,2229.517241  
1,1,12303.120370  
1,1,10308.913194  
1,1,1690.400000  
1,1,4700.277778  
1,1,3383.011364  
1,1,14399.977273  
1,1,8607.920213  
1,1,10072.369898  
1,1,4170.236413  
1,1,3559.061224  
1,1,6735.312500  
1,1,1895.558824  
1,1,5644.687500  
1,1,5598.765306  
1,1,2059.952381  
1,1,7841.008065  
1,1,1504.528846  
1,1,2193.120690  
1,1,19045.952703  
1,1,1898.441667  
1,1,2025.348837  
1,1,15125.997340  
1,1,3897.993902  
1,1,15591.000000  
1,1,4917.469828  
1,1,7055.218750  
1,1,2851.763158  
1,1,2062.408163  
1,1,5210.750000  
1,1,12841.703704

1,1,5785.180233  
1,1,1853.935897  
1,1,6600.425000  
1,1,2372.845588  
1,1,9037.465625  
1,1,2984.090116  
1,1,3336.710106  
1,1,14574.897059  
1,1,5438.496528  
1,1,2538.869048  
1,1,3926.096774  
1,1,14301.506757  
1,1,10578.961310  
1,1,8664.237805  
1,1,3092.682927  
1,1,7509.470588  
1,1,7229.441176  
1,1,7374.519531  
1,1,6963.327586  
1,1,1553.381579  
1,1,2162.864583  
1,1,18987.796875  
1,1,6448.363636  
1,1,12414.728261  
1,1,4028.412162  
1,1,1972.517857  
1,1,6272.990385  
1,1,2861.810811  
1,1,2626.414474  
1,1,2229.764706  
1,1,3384.620968  
1,1,2571.093023  
1,1,1595.708333  
1,1,2611.480263  
1,1,5076.955645  
1,1,2543.267857  
1,1,3289.829787  
1,1,11458.289474  
1,1,3804.335227  
1,1,2942.247449  
1,1,14817.041667  
1,1,2264.647059  
1,1,5464.407407  
1,1,4848.500000  
1,1,2676.266304  
1,1,13322.416667  
1,1,6760.923077  
1,1,2002.889205  
1,1,2744.461957  
1,1,2415.810811  
1,1,7816.777778  
1,1,13196.418103  
1,1,5881.533333  
1,1,7023.960000  
1,1,1832.895833  
1,1,12089.120000  
1,1,1751.396739  
1,1,14027.750000  
1,1,7397.163462  
1,1,5172.378049  
1,1,7866.519737  
1,1,2175.971875  
1,1,7283.828125  
1,1,1690.125000  
1,1,1668.290541  
1,1,11007.100806

1,1,1662.470588  
1,1,3561.057143  
1,1,10415.162162  
1,1,13313.548077  
1,1,8200.573718  
1,1,12081.788194  
1,1,7490.578125  
1,1,1626.357143  
1,1,1510.708333  
1,1,1867.928571  
1,1,8325.602564  
1,1,8118.875000  
1,1,2445.242188  
1,1,1537.884615  
1,1,12319.705882  
1,1,7701.056034  
1,1,2885.562500  
1,1,2212.407895  
1,1,2754.807692  
1,1,2697.836806  
1,1,1654.600000  
1,1,2205.810976  
1,1,2205.214674  
1,1,5712.500000  
1,1,2449.726190  
1,1,1725.790541  
1,1,7306.411585  
1,1,7260.428571  
1,1,8544.781250  
1,1,2583.914634  
1,1,3879.359375  
1,1,2460.910000  
1,1,4147.882979  
1,1,1601.750000  
1,1,2448.366071  
1,1,2191.576220  
1,1,1699.312500  
1,1,1639.744048  
1,1,2806.990132  
1,1,3351.179878  
1,1,2235.620690  
1,1,3080.869318  
1,1,2778.356061  
1,1,6899.263889  
1,1,3033.257143  
1,1,2101.791045  
1,1,4414.386628  
1,1,3611.310811  
1,1,1990.160920  
1,1,11243.007812  
1,1,16956.508333  
1,1,1758.558824  
1,1,1961.698370  
1,1,6155.000000  
1,1,15517.125000  
1,1,7073.333333  
1,1,2958.008065  
1,1,8859.734694  
1,1,4240.464286  
1,1,1634.470588  
1,1,10813.977778  
1,1,7870.823864  
1,1,7120.729167  
1,1,2568.240132  
1,1,1898.331731  
1,1,3886.831522

1,1,14299.718750  
1,1,2221.053571  
1,1,5362.552326  
1,1,2873.731707  
1,1,10333.029255  
1,1,1637.955645  
1,1,2224.707386  
1,1,2145.187500  
1,1,6835.289474  
1,1,3565.557927  
1,1,2911.708333  
1,1,1615.592391  
1,1,2236.687500  
1,1,7602.103448  
1,1,6563.912791  
1,1,2717.007979  
1,1,12238.181034  
1,1,3132.591216  
1,1,3070.000000  
1,1,3458.672500  
1,1,3732.704082  
1,1,5512.907895  
1,1,15091.728125  
1,1,17905.284314  
1,1,3496.563830  
1,1,4659.056250  
1,1,7494.125000  
1,1,14095.414773  
1,1,6622.000000  
1,1,1804.437126  
1,1,7142.833333  
1,1,2419.117188  
1,1,12075.884615  
1,1,12261.915000  
1,1,7419.629808  
1,1,1867.437500  
1,1,13656.157895  
1,1,3554.028846  
1,1,16520.637931  
1,1,8235.692073  
1,1,2195.201923  
1,1,6338.000000  
1,1,2469.259146  
1,1,2617.914286  
1,1,7548.298077  
1,1,4245.466216  
1,1,2047.923077  
1,1,7488.437500  
1,1,9220.703488  
1,1,8225.663793  
1,1,11940.670732  
1,1,13184.229167  
1,1,8972.633333  
1,1,2113.453125  
1,1,2391.711111  
1,1,7329.625000  
1,1,7845.080000  
1,1,15145.600000  
1,1,11599.911111  
1,1,2055.991848  
1,1,2283.500000  
1,1,10982.406977  
1,1,15894.454545  
1,1,5862.255952  
1,1,4038.106707  
1,1,4004.500000

1,1,10499.199074  
1,1,2516.363636  
1,1,1784.213235  
1,1,5036.545455  
1,1,2808.058824  
1,1,16842.320000  
1,1,13158.684211  
1,1,1552.846154  
1,1,3602.985714  
1,1,1679.826087  
1,1,4915.850000  
1,1,2787.363636  
1,1,5222.075000  
1,1,2290.062500  
1,1,2984.563830  
1,1,1721.539474  
1,1,1698.240625  
1,1,4857.618421  
1,1,5170.005556  
1,1,2210.443627  
1,1,5294.391892  
1,1,1523.975000  
1,1,19163.152778  
1,1,3058.401840  
1,1,5944.595395  
1,1,2110.872449  
1,1,10472.400000  
1,1,12656.125000  
1,1,4432.125000  
1,1,3984.884146  
1,1,1563.789286  
1,1,2875.058824  
1,1,2986.465116  
1,1,6456.047619  
1,1,7179.647321  
1,1,5750.351351  
1,1,3732.536765  
1,1,4839.044271  
1,1,12108.500000  
1,1,4422.336957  
1,1,8120.685714  
1,1,2776.750000  
1,1,2401.000000  
1,1,6449.500000  
1,1,1587.823529  
1,1,8014.243421  
1,1,8052.477273  
1,1,4504.414773  
1,1,1658.654762  
1,1,4197.281250  
1,1,12295.187500  
1,1,3759.712963  
1,1,4108.544118  
1,1,5349.265306  
1,1,1592.867647  
1,1,3496.107143  
1,1,1701.585052  
1,1,8005.640244  
1,1,9908.166667  
1,1,2616.388889  
1,1,8810.044872  
1,1,1995.182927  
1,1,2468.757353  
1,1,9047.854167  
1,1,3574.365385  
1,1,1529.690625

1,1,7997.454545  
1,1,4804.417969  
1,1,4209.837209  
1,1,15407.500000  
1,1,1701.500000  
1,1,1699.187500  
1,1,4731.987179  
1,1,3637.182065  
1,1,2100.368590  
1,1,1664.074405  
1,1,5333.500000  
1,1,1601.279412  
1,1,5278.342857  
1,1,8206.918919  
1,1,1731.008065  
1,1,6221.923077  
1,1,3574.348214  
1,1,2359.375000  
1,1,2630.000000  
1,1,5897.687500  
1,1,2732.918919  
1,1,7015.218750  
1,1,1696.500000  
1,1,2964.675000  
1,1,4658.452703  
1,1,12312.104730  
1,1,13164.085938  
1,1,7645.156250  
1,1,3228.059524  
1,1,3075.091837  
1,1,2817.852941  
1,1,10826.133333  
1,1,5690.675532  
1,1,2243.940476  
1,1,3871.947674  
1,1,3756.859375  
1,1,6347.562500  
1,1,1750.160714  
1,1,13067.300781  
1,1,12178.340278  
1,1,3659.950581  
1,1,12211.845238  
1,1,13572.511111  
1,1,3451.127660  
1,1,6801.712500  
1,1,2087.668750  
1,1,1545.411765  
1,1,7990.367424  
1,1,18573.570513  
1,1,4243.600000  
1,1,8079.765957  
1,1,6963.091346  
1,1,8364.071429  
1,1,1829.888889  
1,1,1701.836957  
1,1,2658.666667  
1,1,2060.375000  
1,1,1619.557292  
1,1,5302.657895  
1,1,7801.375000  
1,1,1522.222222  
1,1,5018.593750  
1,1,6281.375000  
1,1,5402.483553  
1,1,5532.846154  
1,1,19787.908784

1,1,1563.142857  
1,1,1559.399306  
1,1,7200.072368  
1,1,19456.261364  
1,1,9968.156250  
1,1,1571.354167  
1,1,2887.882353  
1,1,3219.959375  
1,1,3841.806818  
1,1,3230.808511  
1,1,6836.142857  
1,1,7996.103448  
1,1,5574.426136  
1,1,1563.166667  
1,1,3775.267045  
1,1,15013.614286  
1,1,1739.800000  
1,1,8755.091463  
1,1,6298.605263  
1,1,9169.109848  
1,1,11262.141304  
1,1,2214.025641  
1,1,10664.730469  
1,1,3024.276596  
1,1,7434.375000  
1,1,3941.392857  
1,1,1892.317308  
1,1,4336.863636  
1,1,3941.166667  
1,1,2069.364130  
1,1,4833.450000  
1,1,9070.952128  
1,1,2778.559783  
1,1,4668.691489  
1,1,4494.168269  
1,1,1883.714286  
1,1,3957.000000  
1,1,2860.205882  
1,1,13385.258523  
1,1,4391.847826  
1,1,7281.661290  
1,1,11532.783654  
1,1,6811.945946  
1,1,2882.384615  
1,1,6916.408654  
1,1,15227.189394  
1,1,2443.000000  
1,1,13179.521739  
1,1,1749.184211  
1,1,7582.932692  
1,1,4115.853571  
1,1,1971.312500  
1,1,3606.477273  
1,1,18067.162500  
1,1,2118.309028  
1,1,2477.200000  
1,1,2644.716667  
1,1,2559.681818  
1,1,7130.054054  
1,1,3852.683594  
1,1,12830.923077  
1,1,4102.375000  
1,1,7837.375000  
1,1,7768.271552  
1,1,6644.000000  
1,1,7621.208333

1,1,1781.435897  
1,1,2206.604651  
1,1,8056.520833  
1,1,7197.690000  
1,1,7321.386364  
1,1,1788.934524  
1,1,6923.573718  
1,1,15958.470833  
1,1,15938.073171  
1,1,5073.098684  
1,1,1583.796053  
1,1,2274.437500  
1,1,10504.250000  
1,1,12552.861111  
1,1,2847.229592  
1,1,2252.425000  
1,1,4458.500000  
1,1,1900.363889  
1,1,15242.990625  
1,1,2633.704268  
1,1,4848.372845  
1,1,1556.325581  
1,1,3506.200000  
1,1,7060.127717  
1,1,3690.367021  
1,1,1778.923077  
1,1,7460.405405  
1,1,3600.732558  
1,1,3154.088710  
1,1,14187.045732  
1,1,3498.325581  
1,1,1559.831250  
1,1,8816.750000  
1,1,1589.233173  
1,1,3199.798780  
1,1,5271.695652  
1,1,2851.000000  
1,1,8086.791667  
1,1,2776.733871  
1,1,2214.645270  
1,1,6985.531250  
1,1,3000.317073  
1,1,10631.636364  
1,1,1760.897436  
1,1,2758.360795  
1,1,7574.250000  
1,1,1565.000000  
1,1,1668.107143  
1,1,2316.198864  
1,1,1677.475000  
1,1,2019.125000  
1,1,12320.909091  
1,1,6737.972973  
1,1,4013.308511  
1,1,9313.432692  
1,1,4212.588816  
1,1,6396.804878  
1,1,13254.527778  
1,1,3516.174107  
1,1,4424.048780  
1,1,3446.636111  
1,1,1661.508621  
1,1,2282.866071  
1,1,4247.616477  
1,1,12325.824219  
1,1,6783.875000

1,1,3355.607143  
1,1,12464.000000  
1,1,2628.483333  
1,1,2562.034884  
1,1,4612.675595  
1,1,1575.400000  
1,1,5302.500000  
1,1,1585.291667  
1,1,1950.296875  
1,1,4593.100000  
1,1,3049.736842  
1,1,1821.765306  
1,1,4511.424419  
1,1,6542.277778  
1,1,3757.256983  
1,1,1626.020408  
1,1,2460.799419  
1,1,2230.728261  
1,1,1594.500000  
1,1,2990.705645  
1,1,1976.500000  
1,1,6926.481481  
1,1,3149.869565  
1,1,2082.492424  
1,1,2200.546875  
1,1,9165.875000  
1,1,4146.052632  
1,1,2787.640625  
1,1,5928.911458  
1,1,2208.701923  
1,1,1630.865385  
1,1,1921.769231  
1,1,6167.593750  
1,1,1554.522222  
1,1,4300.741477  
1,1,11810.875000  
1,1,4759.906250  
1,1,3383.707143  
1,1,3727.428571  
1,1,16002.657895  
1,1,9770.340426  
1,1,5515.166667  
1,1,3845.438776  
1,1,7317.461538  
1,1,6879.773649  
1,1,3165.383721  
1,1,3102.715909  
1,1,1615.368421  
1,1,1613.000000  
1,1,18072.277027  
1,1,3810.319149  
1,1,9912.251748  
1,1,10238.628205  
1,1,2441.219444  
1,1,6455.242424  
1,1,2678.659091  
1,1,2891.556452  
1,1,3436.822222  
1,1,1603.352564  
1,1,5331.324468  
1,1,7498.078947  
1,1,5859.181818  
1,1,10630.809524  
1,1,2888.054878  
1,1,1783.127660  
1,1,1971.605769

1,1,2732.950000  
1,1,4875.933140  
1,1,2619.587500  
1,1,2918.852273  
1,1,2148.230769  
1,1,2433.375000  
1,1,4223.571429  
1,1,4456.960938  
1,1,12580.687500  
1,1,2304.567568  
1,1,3450.310976  
1,1,1569.000000  
1,1,3076.000000  
1,1,4942.500000  
1,1,1974.406250  
1,1,3888.868421  
1,1,2356.773438  
1,1,2026.174419  
1,1,2109.594595  
1,1,13400.878049  
1,1,2576.583333  
1,1,5096.946809  
1,1,10074.780000  
1,1,5551.043750  
1,1,5213.541667  
1,1,1532.725000  
1,1,3858.302326  
1,1,3244.620690  
1,1,2108.471354  
1,1,13230.305147  
1,1,7821.115385  
1,1,1634.235795  
1,1,5847.303571  
1,1,2060.653846  
1,1,1832.413462  
1,1,6254.444444  
1,1,3973.423077  
1,1,6625.045918  
1,1,2497.887821  
1,1,8190.481481  
1,1,2568.242021  
1,1,10152.437500  
1,1,5144.344595  
1,1,2528.355263  
1,1,6669.046296  
1,1,3315.665179  
1,1,1677.954545  
1,1,12869.207386  
1,1,14605.289474  
1,1,5481.445513  
1,1,3951.281250  
1,1,7032.325000  
1,1,1562.377660  
1,1,1950.347561  
1,1,1762.753378  
1,1,6876.300000  
1,1,2433.565341  
1,1,2055.382979  
1,1,6517.655488  
1,1,8897.596154  
1,1,3250.669355  
1,1,1735.166667  
1,1,12426.097826  
1,1,3779.375000  
1,1,2203.942073  
1,1,3371.413043

1,1,14059.217391  
1,1,6760.982143  
1,1,2960.915625  
1,1,7883.843750  
1,1,3759.852041  
1,1,1774.544118  
1,1,6520.000000  
1,1,7490.941964  
1,1,3392.363636  
1,1,8285.208333  
1,1,7866.625000  
1,1,8907.306034  
1,1,4529.554878  
1,1,2390.466912  
1,1,10231.350000  
1,1,7476.113281  
1,1,2213.409722  
1,1,9748.599265  
1,1,3780.659574  
1,1,5682.710526  
1,1,1993.043478  
1,1,4876.794872  
1,1,1766.052632  
1,1,1949.614865  
1,1,6628.890244  
1,1,5770.202381  
1,1,3775.300000  
1,1,1922.533784  
1,1,2496.261905  
1,1,2103.429688  
1,1,1518.714286  
1,1,18662.595588  
1,1,3127.831395  
1,1,2650.638587  
1,1,4419.743056  
1,1,12860.078947  
1,1,7681.739130  
1,1,7373.750000  
1,1,2633.007353  
1,1,1809.814024  
1,1,2757.015625  
1,1,2608.843023  
1,1,13568.391892  
1,1,13414.500000  
1,1,8112.625000  
1,1,3693.473837  
1,1,3132.625000  
1,1,2523.013587  
1,1,2038.207447  
1,1,2607.668750  
1,1,2728.413793  
1,1,3146.500000  
1,1,4066.943750  
1,1,2202.070513  
1,1,13979.871324  
1,1,8630.206395  
1,1,2997.245192  
1,1,6568.500000  
1,1,8046.009615  
1,1,1528.921053  
1,1,1848.538732  
1,1,3134.846154  
1,1,3423.414634  
1,1,1704.500000  
1,1,7021.750000  
1,1,2687.992647

1,1,1506.000000  
1,1,12930.244318  
1,1,6239.271739  
1,1,7828.274194  
1,1,3260.212500  
1,1,1795.864796  
1,1,10464.593750  
1,1,3364.762821  
1,1,7926.906250  
1,1,4807.663043  
1,1,10268.151786  
1,1,2560.616279  
1,1,3269.337500  
1,1,2529.857143  
1,1,6816.486111  
1,1,2633.008929  
1,1,11549.677632  
1,1,3326.215116  
1,1,6035.761029  
1,1,2081.789474  
1,1,6670.116667  
1,1,1785.371429  
1,1,7556.312500  
1,1,2331.479452  
1,1,1873.988372  
1,1,3412.687500  
1,1,6977.267241  
1,1,1781.332547  
1,1,6823.500000  
1,1,3011.542857  
1,1,3048.790625  
1,1,7084.756410  
1,1,2101.182065  
1,1,2309.430921  
1,1,2167.444444  
1,1,3159.964286  
1,1,2724.375000  
1,1,1794.467949  
1,1,4356.168919  
1,1,4649.595238  
1,1,2223.868421  
1,1,4898.896341  
1,1,7604.900000  
1,1,3444.450521  
1,1,4272.861979  
1,1,9353.884615  
1,1,2161.307692  
1,1,2319.990566  
1,1,8729.052083  
1,1,2554.207317  
1,1,5569.450000  
1,1,1672.946875  
1,1,1669.227273  
1,1,3937.418605  
1,1,14355.253788  
1,1,15892.934783  
1,1,3084.255319  
1,1,7151.055556  
1,1,1662.604712  
1,1,2601.279070  
1,1,2055.203947  
1,1,2049.284375  
1,1,3409.616667  
1,1,2211.229167  
1,1,19712.450000  
1,1,2176.500000

1,1,5401.043478  
1,1,7940.915179  
1,1,1733.052326  
1,1,7848.534483  
1,1,15786.216216  
1,1,3460.807692  
1,1,6785.179487  
1,1,6709.976190  
1,1,15527.875000  
1,1,8654.777778  
1,1,2698.642045  
1,1,8127.100000  
1,1,2483.946429  
1,1,5432.284091  
1,1,1750.270833  
1,1,1691.101562  
1,1,3059.566176  
1,1,8045.013514  
1,1,7976.182692  
1,1,2137.560976  
1,1,5305.697368  
1,1,5577.372283  
1,1,1868.944712  
1,1,8844.902778  
1,1,11446.101190  
1,1,8303.666667  
1,1,1811.278409  
1,1,3135.817568  
1,1,6033.951531  
1,1,1720.415441  
1,1,4155.641026  
1,1,7961.625000  
1,1,12609.902778  
1,1,3832.875000  
1,1,3159.960526  
1,1,11404.000000  
1,1,1517.944767  
1,1,7923.479167  
1,1,1935.375000  
1,1,5630.947368  
1,1,11926.121212  
1,1,3679.277027  
1,1,1581.589286  
1,1,9040.487805  
1,1,2938.545455  
1,1,1953.063889  
1,1,12091.692308  
1,1,6674.073529  
1,1,1725.190625  
1,1,6504.121622  
1,1,8464.343750  
1,1,4159.893382  
1,1,1959.391447  
1,1,15008.375000  
1,1,2961.841837  
1,1,7712.200000  
1,1,2762.281915  
1,1,2130.660256  
1,1,7710.333333  
1,1,18919.329032  
1,1,7766.671875  
1,1,1943.318750  
1,1,13279.850962  
1,1,1661.050000  
1,1,2315.870968  
1,1,3801.322581

1,1,2243.875000  
1,1,1842.598684  
1,1,7942.843750  
1,1,2668.201705  
1,1,17131.503472  
1,1,3784.137500  
1,1,2435.397727  
1,1,2888.529412  
1,1,4974.941860  
1,1,4719.948171  
1,1,7827.553571  
1,1,3234.821875  
1,1,4779.714286  
1,1,2679.142857  
1,1,1630.863636  
1,1,7583.165644  
1,1,4250.000000  
1,1,7667.942308  
1,1,18985.721154  
1,1,6954.208333  
1,1,1699.763587  
1,1,7034.500000  
1,1,7091.663043  
1,1,18431.614286  
1,1,14855.357143  
1,1,3103.029762  
1,1,2491.261029  
1,1,5797.299479  
1,1,4175.625000  
1,1,5400.636364  
1,1,6114.741279  
1,1,2849.127604  
1,1,15173.364865  
1,1,4095.615385  
1,1,4316.551630  
1,1,5714.550000  
1,1,1544.901515  
1,1,1656.477273  
1,1,1661.346591  
1,1,2630.121951  
1,1,1601.890625  
1,1,7067.458333  
1,1,1516.526042  
1,1,7122.670455  
1,1,4188.699219  
1,1,4186.051282  
1,1,1867.250000  
1,1,15474.310345  
1,1,15771.382114  
1,1,7149.811321  
1,1,3429.357143  
1,1,3207.595588  
1,1,11482.807927  
1,1,2453.088235  
1,1,3262.437500  
1,1,5311.852273  
1,1,3353.078947  
1,1,2660.290000  
1,1,13790.601852  
1,1,2703.731707  
1,1,3727.000000  
1,1,2075.645833  
1,1,12764.250000  
1,1,4376.242857  
1,1,6182.113889  
1,1,1957.273810

1,1,2200.825000  
1,1,5551.316964  
1,1,12475.500000  
1,1,2231.364865  
1,1,6573.554688  
1,1,14376.500000  
1,1,7998.066667  
1,1,3156.508333  
1,1,6903.732955  
1,1,7637.326271  
1,1,1641.969512  
1,1,3139.035000  
1,1,8425.250000  
1,1,5793.888889  
1,1,3818.091837  
1,1,4120.805556  
1,1,14261.819767  
1,1,1699.380435  
1,1,2728.257812  
1,1,3195.025735  
1,1,5513.375000  
1,1,7505.799107  
1,1,8636.643939  
1,1,8183.406250  
1,1,11577.958333  
1,1,2688.234043  
1,1,4626.853659  
1,1,4040.979167  
1,1,2219.304348  
1,1,2628.717742  
1,1,14388.990385  
1,1,1851.677083  
1,1,2386.514286  
1,1,1886.276596  
1,1,7071.290323  
1,1,4640.602041  
1,1,9481.038462  
1,1,1742.983696  
1,1,19410.392857  
1,1,4216.250000  
1,1,1648.100543  
1,1,2210.012195  
1,1,7496.456897  
1,1,6313.881579  
1,1,8307.923077  
1,1,1609.367188  
1,1,1764.089286  
1,1,18707.555233  
1,1,13233.846154  
1,1,13190.493590  
1,1,12483.024390  
1,1,2106.614286  
1,1,5712.214844  
1,1,4123.280172  
1,1,3890.171875  
1,1,4009.642857  
1,1,2250.882353  
1,1,5320.182292  
1,1,2489.360714  
1,1,1544.740000  
1,1,3825.043478  
1,1,8314.568750  
1,1,4428.312500  
1,1,4606.756098  
1,1,8281.996711  
1,1,1828.033333

1,1,1683.071429  
1,1,19552.052632  
1,1,13495.259615  
1,1,2451.940341  
1,1,8178.975000  
1,1,1578.820946  
1,1,12326.833333  
1,1,3806.078125  
1,1,2309.500000  
1,1,2739.257143  
1,1,8764.410714  
1,1,7687.000000  
1,1,3341.002604  
1,1,7777.000000  
1,1,2285.760870  
1,1,8015.400000  
1,1,3086.304348  
1,1,4166.661765  
1,1,4279.463235  
1,1,2331.072368  
1,1,12145.850806  
1,1,1749.862745  
1,1,3202.407407  
1,1,3362.868750  
1,1,14488.913793  
1,1,8104.645833  
1,1,1678.500000  
1,1,16596.781915  
1,1,3840.777778  
1,1,1624.179688  
1,1,3077.915625  
1,1,2186.666667  
1,1,6450.250000  
1,1,3669.772727  
1,1,7880.000000  
1,1,2907.650000  
1,1,7386.396277  
1,1,1896.485795  
1,1,15145.339286  
1,1,4267.897436  
1,1,2309.711957  
1,1,7962.375000  
1,1,7386.411765  
1,1,11158.259542  
1,1,2656.875000  
1,1,1754.074468  
1,1,5965.406250  
1,1,3457.406250  
1,1,4192.921569  
1,1,7320.473684  
1,1,4287.807692  
1,1,1843.565217  
2,2,1603.059524  
2,2,1621.750000  
2,2,4186.922705  
2,2,2768.114583  
2,2,1635.520270  
2,2,2779.511574  
2,2,1772.914894  
2,2,1663.916667  
2,2,1553.375000  
2,2,4121.882353  
2,2,2046.875000  
2,2,4607.122222  
2,2,8835.569444  
2,2,3808.125000

2,2,2362.467262  
2,2,1962.255102  
2,2,1631.839286  
2,2,1547.000000  
2,2,1622.242188  
2,2,2498.851415  
2,2,2778.875000  
2,2,1980.814189  
2,2,3613.285714  
2,2,3555.002604  
2,2,1526.425676  
2,2,1699.037500  
2,2,1710.642857  
2,2,1961.049261  
2,2,4229.428571  
2,2,2700.905488  
2,2,2450.500000  
2,2,1711.711310  
2,2,3887.153017  
2,2,4324.720982  
2,2,1519.428571  
2,2,1866.929348  
2,2,1527.781250  
2,2,5242.754310  
2,2,3497.880952  
2,2,7331.687500  
2,2,2431.955556  
2,2,3396.685714  
2,2,6756.757812  
2,2,2472.778409  
2,2,2458.932500  
2,2,1707.088889  
2,2,15104.867647  
2,2,1925.700000  
2,2,2089.547414  
2,2,5246.125000  
2,2,2678.825000  
2,2,3732.479167  
2,2,7608.411765  
2,2,1713.955000  
2,2,1640.292683  
2,2,2211.514706  
2,2,8707.765690  
2,2,2490.008621  
2,2,1668.064815  
2,2,1723.642857  
2,2,2625.461538  
2,2,2394.583333  
2,2,2695.229592  
2,2,5394.217391  
2,2,1654.853659  
2,2,1776.893617  
2,2,2214.175000  
2,2,1911.200000  
2,2,3630.673077  
2,2,2739.474359  
2,2,4755.457547  
2,2,2249.831522  
2,2,11046.227273  
2,2,3489.857143  
2,2,1807.938776  
2,2,2989.035714  
2,2,7104.464286  
2,2,1899.975446  
2,2,2820.011173  
2,2,7255.245536

2,2,13754.568966  
2,2,1967.567500  
2,2,1610.108696  
2,2,4303.780000  
2,2,1981.152174  
2,2,9194.840426  
2,2,1849.692308  
2,2,4404.500000  
2,2,2216.048077  
2,2,2604.725000  
2,2,4833.530303  
2,2,4240.161585  
2,2,2494.220588  
2,2,1730.105263  
2,2,1709.839286  
2,2,2259.576389  
2,2,2324.943878  
2,2,9181.583333  
2,2,3560.333333  
2,2,2067.964286  
2,2,6255.375000  
2,2,1637.997596  
2,2,2020.861486  
2,2,4847.640625  
2,2,1775.112245  
2,2,2000.340164  
2,2,1699.238889  
2,2,2954.500000  
2,2,3332.117647  
2,2,2054.660714  
2,2,7318.250000  
2,2,1873.549107  
2,2,2068.239362  
2,2,4449.692308  
2,2,1946.208333  
2,2,2329.365854  
2,2,4066.473958  
2,2,1856.659722  
2,2,1862.395833  
2,2,1802.586957  
2,2,3475.703431  
2,2,4825.387755  
2,2,6050.614286  
2,2,4221.633065  
2,2,1534.741706  
2,2,3203.645833  
2,2,2793.872340  
2,2,3140.655172  
2,2,3225.145714  
2,2,7515.015957  
2,2,17926.825000  
2,2,1750.853261  
2,2,2111.341346  
2,2,7799.400000  
2,2,1678.073980  
2,2,2597.095000  
2,2,3542.461165  
2,2,2179.163043  
2,2,1628.008929  
2,2,2128.300000  
2,2,8742.590909  
2,2,1706.175000  
2,2,4661.532738  
2,2,1593.075000  
2,2,8058.716981  
2,2,1815.292614

2,2,5472.334184  
2,2,2053.562500  
2,2,4951.529412  
2,2,1828.055288  
2,2,2144.869444  
2,2,2275.682927  
2,2,1886.412162  
2,2,1723.101744  
2,2,2144.894737  
2,2,1577.841463  
2,2,1945.794118  
2,2,4948.953125  
2,2,1741.250000  
2,2,1686.840426  
2,2,1735.234756  
2,2,1812.666667  
2,2,5515.250000  
2,2,1749.588235  
2,2,2264.324468  
2,2,2593.125000  
2,2,5086.634615  
2,2,3644.750000  
2,2,2435.697115  
2,2,1558.359043  
2,2,1689.255814  
2,2,4410.904255  
2,2,7543.500000  
2,2,1637.926020  
2,2,1737.433824  
2,2,1626.741071  
2,2,3569.948529  
2,2,1644.676471  
2,2,3251.156250  
2,2,1603.500000  
2,2,1607.096354  
2,2,1891.666667  
2,2,3739.041667  
2,2,1724.398936  
2,2,2594.785377  
2,2,6333.650000  
2,2,3152.311224  
2,2,1521.476064  
2,2,4161.583333  
2,2,15226.500000  
2,2,3160.932432  
2,2,3352.754630  
2,2,2430.452830  
2,2,1567.354167  
2,2,2604.531250  
2,2,7764.950980  
2,2,1988.067308  
2,2,13915.375000  
2,2,1861.270270  
2,2,3404.875000  
2,2,5544.775735  
2,2,14134.217262  
2,2,2258.058333  
2,2,4562.811321  
2,2,1610.401163  
2,2,1542.438830  
2,2,2219.117647  
2,2,2825.404891  
2,2,6416.125000  
2,2,2757.444444  
2,2,2557.668919  
2,2,4275.375000

2,2,2464.458333  
2,2,3629.487805  
2,2,2331.080357  
2,2,1852.712838  
2,2,1597.326923  
2,2,3245.061224  
2,2,1696.805851  
2,2,2683.379487  
2,2,1832.994186  
2,2,1843.619565  
2,2,3639.027778  
2,2,1943.566456  
2,2,1783.773585  
2,2,2839.875000  
2,2,6274.811321  
2,2,1722.372093  
2,2,2084.800000  
2,2,1811.263636  
2,2,2355.645161  
2,2,7707.159091  
2,2,3726.662162  
2,2,2319.783333  
2,2,10902.550781  
2,2,2406.500000  
2,2,2712.430556  
2,2,2994.761628  
2,2,1555.101351  
2,2,1610.125000  
2,2,2218.663043  
2,2,1620.801471  
2,2,2207.531250  
2,2,2201.553191  
2,2,2117.483796  
2,2,3755.995536  
2,2,5492.016892  
2,2,1844.351064  
2,2,1662.000000  
2,2,2668.040761  
2,2,2729.250000  
2,2,2040.410256  
2,2,1613.057692  
2,2,2073.482955  
2,2,1866.305556  
2,2,2104.712264  
2,2,2261.220000  
2,2,6484.861486  
2,2,1691.890000  
2,2,2446.800000  
2,2,1844.142857  
2,2,2514.460000  
2,2,2648.608108  
2,2,10821.476190  
2,2,1719.365854  
2,2,1583.175000  
2,2,4308.321429  
2,2,3313.609375  
2,2,2056.568750  
2,2,2585.554688  
2,2,2237.762500  
2,2,14293.066964  
2,2,1819.042683  
2,2,2222.227273  
2,2,2787.250000  
2,2,4280.125000  
2,2,2171.468085  
2,2,4750.267857

2,2,5055.354730  
2,2,2494.857955  
2,2,2483.616071  
2,2,1766.058824  
2,2,2452.618421  
2,2,2807.113839  
2,2,1867.011628  
2,2,7366.801020  
2,2,2362.684896  
2,2,3615.535256  
2,2,1987.121951  
2,2,1707.750000  
2,2,1505.920000  
2,2,5160.785276  
2,2,2002.383333  
2,2,1815.864583  
2,2,4015.697368  
2,2,4841.453846  
2,2,1539.955882  
2,2,1917.577778  
2,2,3070.578947  
2,2,1537.821875  
2,2,2265.108333  
2,2,1514.045455  
2,2,2214.722561  
2,2,1874.395833  
2,2,1808.718085  
2,2,2704.563953  
2,2,1853.598684  
2,2,2690.157895  
2,2,4309.058824  
2,2,2115.345930  
2,2,2019.714286  
2,2,2314.865196  
2,2,2270.235000  
2,2,2036.480263  
2,2,9312.713235  
2,2,2525.644608  
2,2,1551.796875  
2,2,2295.767857  
2,2,6697.520408  
2,2,1720.434783  
2,2,4805.365854  
2,2,1515.863971  
2,2,8191.485849  
2,2,2344.885417  
2,2,13101.266949  
2,2,1858.479167  
2,2,1718.276596  
2,2,1683.528409  
2,2,1895.813953  
2,2,4185.638728  
2,2,2184.422222  
2,2,2737.375000  
2,2,1777.009804  
2,2,5236.285714  
2,2,5838.048780  
2,2,3993.566038  
2,2,5823.704268  
2,2,2677.898438  
2,2,4142.342629  
2,2,1812.104651  
2,2,3105.022222  
2,2,1778.625000  
2,2,1677.609626  
2,2,8583.000000

2,2,7003.261905  
2,2,2054.675532  
2,2,2188.600000  
2,2,5313.663136  
2,2,2113.906977  
2,2,4884.500000  
2,2,1643.623037  
2,2,3535.794444  
2,2,6192.627273  
2,2,2112.767500  
2,2,1990.441860  
2,2,1849.225000  
2,2,15692.389881  
2,2,2872.702381  
2,2,1785.486607  
2,2,1778.868421  
2,2,2240.875000  
2,2,1555.825000  
2,2,1665.187500  
2,2,5634.636364  
2,2,1901.685897  
2,2,2466.450000  
2,2,8126.900000  
2,2,2175.871795  
2,2,1738.980769  
2,2,3500.826705  
2,2,6535.583333  
2,2,3247.380952  
2,2,3208.872449  
2,2,2153.973684  
2,2,1998.310000  
2,2,5005.357143  
2,2,2213.958333  
2,2,2753.142857  
2,2,13742.358333  
2,2,1856.160000  
2,2,8744.081081  
2,2,1731.567568  
2,2,2367.157895  
2,2,1522.293478  
2,2,4263.868304  
2,2,1518.117647  
2,2,3009.157895  
2,2,1619.356383  
2,2,1517.145161  
2,2,1503.182432  
2,2,4322.336538  
2,2,2550.519608  
2,2,2892.454545  
2,2,1532.673913  
2,2,2151.025862  
2,2,1701.576220  
2,2,5365.165441  
2,2,1763.215426  
2,2,1948.188830  
2,2,1781.705128  
2,2,1568.189103  
2,2,11004.687500  
2,2,5397.157895  
2,2,4619.089286  
2,2,1693.285714  
2,2,3792.963415  
2,2,2080.351190  
2,2,5860.534091  
2,2,1542.257353  
2,2,2585.578488

2,2,4020.882812  
2,2,2150.361111  
2,2,1918.683673  
2,2,2092.195652  
2,2,2114.921429  
2,2,1511.519737  
2,2,2440.943182  
2,2,2239.694196  
2,2,2559.057143  
2,2,3634.348837  
2,2,5297.307692  
2,2,2373.461538  
2,2,3826.994186  
2,2,2613.137821  
2,2,1920.532895  
2,2,19628.824519  
2,2,1773.403846  
2,2,1650.272727  
2,2,4980.492788  
2,2,2784.035256  
2,2,1610.892857  
2,2,9951.582317  
2,2,4119.982558  
2,2,1909.609043  
2,2,1572.543478  
2,2,1546.040541  
2,2,2412.405063  
2,2,1556.536585  
2,2,2136.708333  
2,2,2489.429825  
2,2,11730.586957  
2,2,1681.840000  
2,2,1955.455357  
2,2,2048.686047  
2,2,2507.741667  
2,2,4655.802326  
2,2,8374.063636  
2,2,6446.021277  
2,2,1625.764151  
2,2,1972.340426  
2,2,4466.601351  
2,2,6610.288265  
2,2,1830.127451  
2,2,6315.927500  
2,2,7682.131579  
2,2,11796.382353  
2,2,2616.413265  
2,2,11537.327778  
2,2,2404.861702  
2,2,2021.468750  
2,2,2223.420455  
2,2,2748.524123  
2,2,1791.335714  
2,2,1810.838235  
2,2,2063.953125  
2,2,14727.497159  
2,2,1987.485000  
2,2,1527.521226  
2,2,1600.214623  
2,2,2594.351744  
2,2,3734.875000  
2,2,11406.894231  
2,2,1544.037500  
2,2,6202.078431  
2,2,1600.330357  
2,2,1535.871795

2,2,1623.182927  
2,2,3132.066406  
2,2,3744.957447  
2,2,2250.768293  
2,2,8192.534314  
2,2,1657.391304  
2,2,1608.785714  
2,2,2373.390244  
2,2,3062.835106  
2,2,1833.096875  
2,2,5183.776316  
2,2,1640.593750  
2,2,1853.636364  
2,2,3539.080882  
2,2,3019.529412  
2,2,1995.076705  
2,2,6097.718750  
2,2,3230.312500  
2,2,16874.647059  
2,2,1606.445000  
2,2,2909.750000  
2,2,3830.476562  
2,2,1875.132653  
2,2,2097.527174  
2,2,6484.285714  
2,2,3908.918478  
2,2,3830.505682  
2,2,1914.312500  
2,2,14984.880682  
2,2,1745.666667  
2,2,1933.088542  
2,2,2344.603723  
2,2,3575.108014  
2,2,2352.731771  
2,2,2457.125000  
2,2,3556.600000  
2,2,1530.104167  
2,2,10501.361702  
2,2,2669.921296  
2,2,2246.875000  
2,2,2095.415094  
2,2,1719.902439  
2,2,1611.584239  
2,2,2558.702381  
2,2,11277.560976  
2,2,8627.481250  
2,2,1905.922619  
2,2,2155.783482  
2,2,2328.795000  
2,2,2170.337719  
2,2,1582.533981  
2,2,2331.926020  
2,2,1849.572917  
2,2,2991.200000  
2,2,1563.010593  
2,2,1510.840426  
2,2,3544.655488  
2,2,4991.565789  
2,2,1562.000000  
2,2,2360.165698  
2,2,1576.232558  
2,2,7406.611111  
2,2,1672.195122  
2,2,2367.570000  
2,2,3004.679878  
2,2,1592.592500

2,2,1617.051471  
2,2,9376.480000  
2,2,3498.323529  
2,2,3859.260417  
2,2,2044.071429  
2,2,2661.679245  
2,2,1518.890909  
2,2,3398.500000  
2,2,2921.808511  
2,2,15926.579545  
2,2,1547.226852  
2,2,1971.715426  
2,2,2055.988426  
2,2,1665.535326  
2,2,1687.443878  
2,2,14159.928571  
2,2,1549.985294  
2,2,1615.035714  
2,2,1774.170000  
2,2,1936.245690  
2,2,2878.175532  
2,2,2520.416667  
2,2,7512.850000  
2,2,1554.087500  
2,2,1992.262500  
2,2,4183.938889  
2,2,2235.619048  
2,2,16669.452830  
2,2,1634.621951  
2,2,2540.170000  
2,2,1657.703125  
2,2,6915.982143  
2,2,1546.000000  
2,2,2600.588816  
2,2,1844.795918  
2,2,3937.721429  
2,2,1974.362245  
2,2,2386.096591  
2,2,1603.182692  
2,2,3169.339286  
2,2,1579.090909  
2,2,1943.372093  
2,2,1790.605263  
2,2,15236.467593  
2,2,2958.243902  
2,2,8026.460106  
2,2,4991.073171  
2,2,8745.437500  
2,2,1530.200893  
2,2,9324.009146  
2,2,1598.591667  
2,2,2673.775000  
2,2,2351.012195  
2,2,4243.463542  
2,2,3053.212264  
2,2,10229.386364  
2,2,7399.500000  
2,2,2008.270833  
2,2,3051.345238  
2,2,2005.228972  
2,2,1789.368243  
2,2,2003.200658  
2,2,3698.211538  
2,2,2673.187500  
2,2,2400.968750  
2,2,1557.960526

2,2,3802.875000  
2,2,1796.127551  
2,2,1935.002551  
2,2,5612.250000  
2,2,2695.923077  
2,2,2414.996429  
2,2,1523.000000  
2,2,1557.025000  
2,2,2190.410714  
2,2,2388.093750  
2,2,3535.875000  
2,2,3074.411111  
2,2,1850.835000  
2,2,1576.252841  
2,2,5700.994681  
2,2,1976.792683  
2,2,1788.660377  
2,2,2553.468750  
2,2,1657.258065  
2,2,2624.377358  
2,2,7028.680147  
2,2,1617.489362  
2,2,2999.990625  
2,2,1681.875000  
2,2,1988.785714  
2,2,1807.750000  
2,2,2720.805000  
2,2,1731.562500  
2,2,1943.075377  
2,2,3387.875000  
2,2,3942.109375  
2,2,1534.617801  
2,2,4927.071429  
2,2,8397.875000  
2,2,11813.882353  
2,2,13161.018293  
2,2,1929.352564  
2,2,3774.468750  
2,2,6688.127717  
2,2,4659.439732  
2,2,2359.982143  
2,2,4734.468085  
2,2,1824.572917  
2,2,1779.532609  
2,2,4217.402174  
2,2,1879.442308  
2,2,3000.500000  
2,2,3584.903846  
2,2,4497.968610  
2,2,1985.950521  
2,2,8734.263889  
2,2,2103.440000  
2,2,12973.395833  
2,2,1506.000000  
2,2,1615.430000  
2,2,2526.585526  
2,2,3682.872340  
2,2,6311.155000  
2,2,2900.242188  
2,2,1533.311321  
2,2,4364.857143  
2,2,4654.932692  
2,2,2788.461538  
2,2,2380.523810  
2,2,2146.648438  
2,2,1597.661585

2,2,3881.000000  
2,2,1608.261111  
2,2,3093.482143  
2,2,2045.583333  
2,2,8145.443750  
2,2,4885.025000  
2,2,2326.694767  
2,2,4083.000000  
2,2,6324.367424  
2,2,14377.441489  
2,2,2091.000000  
2,2,1821.770270  
2,2,1540.437500  
2,2,3429.010870  
2,2,2746.093023  
2,2,3096.500000  
2,2,2982.775510  
2,2,4925.700000  
2,2,1671.652174  
2,2,2182.407143  
2,2,1624.891667  
2,2,1966.387097  
2,2,13797.593085  
2,2,2483.619898  
2,2,4228.773810  
2,2,2166.970238  
2,2,1826.457237  
2,2,1930.551020  
2,2,4209.596154  
2,2,3088.307292  
2,2,2187.171053  
2,2,2082.312500  
2,2,2063.250000  
2,2,1655.345395  
2,2,1593.102041  
2,2,1995.318452  
2,2,1954.355769  
2,2,1893.928571  
2,2,5838.041667  
2,2,2751.275000  
2,2,3381.206731  
2,2,1667.515625  
2,2,2000.533019  
2,2,2140.665698  
2,2,1816.640000  
2,2,5084.604167  
2,2,1619.492647  
2,2,2353.710526  
2,2,2681.096154  
2,2,4767.622727  
2,2,1870.317073  
2,2,2660.476190  
2,2,2123.146552  
2,2,2723.494318  
2,2,4507.347222  
2,2,2417.181818  
2,2,2184.480000  
2,2,1820.047727  
2,2,1533.263158  
2,2,2468.364865  
2,2,1658.153846  
2,2,2764.512931  
2,2,3914.844340  
2,2,1623.580189  
2,2,11891.289062  
2,2,2423.888514

2,2,4723.405556  
2,2,6661.125000  
2,2,11024.727273  
2,2,1808.859375  
2,2,2872.625000  
2,2,2278.812500  
2,2,1709.730114  
2,2,2639.398026  
2,2,3201.059211  
2,2,3186.948529  
2,2,2518.191176  
2,2,4011.881757  
2,2,2504.660156  
2,2,2347.847368  
2,2,4579.494186  
2,2,1787.686364  
2,2,1921.223214  
2,2,2696.056818  
2,2,1724.593750  
2,2,1817.813953  
2,2,1681.568750  
2,2,7852.942073  
2,2,2684.336538  
2,2,2645.479167  
2,2,4003.838362  
2,2,1798.036184  
2,2,2034.716146  
2,2,3730.555556  
2,2,1536.102564  
2,2,12818.753676  
2,2,2364.858491  
2,2,2632.308824  
2,2,2799.339674  
2,2,1644.915948  
2,2,4280.233010  
2,2,2495.593085  
2,2,1953.486111  
2,2,4036.763636  
2,2,1921.533654  
2,2,4579.337838  
2,2,2121.424528  
2,2,1676.167614  
2,2,2581.511905  
2,2,1696.564815  
2,2,3113.187135  
2,2,2191.442308  
2,2,2617.121951  
2,2,2422.652542  
2,2,2072.657895  
2,2,4269.520833  
2,2,2205.095745  
2,2,2138.767442  
2,2,2846.938776  
2,2,6300.500000  
2,2,3658.650000  
2,2,2340.642857  
2,2,1523.013298  
2,2,3259.407407  
2,2,2287.650000  
2,2,1912.117021  
2,2,2058.928571  
2,2,2004.650000  
2,2,1558.815972  
2,2,2296.644231  
2,2,14087.058824  
2,2,1506.605263

2,2,3101.711538  
2,2,1604.375000  
2,2,1689.122396  
2,2,3736.530000  
2,2,13855.136111  
2,2,13818.727273  
2,2,4127.404255  
2,2,2182.453488  
2,2,1514.660326  
2,2,3017.619318  
2,2,2172.152439  
2,2,2557.152174  
2,2,1770.566667  
2,2,2755.482143  
2,2,2966.142857  
2,2,16334.794872  
2,2,2177.285714  
2,2,3173.342857  
2,2,1536.942857  
2,2,8419.250000  
2,2,1625.640244  
2,2,1916.630682  
2,2,7180.528846  
2,2,1595.789286  
2,2,1602.232143  
2,2,2314.602273  
2,2,2792.457317  
2,2,13314.032609  
2,2,10459.639706  
2,2,9531.222727  
2,2,2618.094595  
2,2,4553.957447  
2,2,7179.553191  
2,2,1805.688482  
2,2,5986.156250  
2,2,1715.733333  
2,2,1735.804688  
2,2,2209.044643  
2,2,1860.929348  
2,2,8259.441176  
2,2,3155.076531  
2,2,4200.437500  
2,2,1635.614130  
2,2,2491.617788  
2,2,2083.451220  
2,2,1615.482558  
2,2,2421.726190  
2,2,1554.295000  
2,2,1504.884434  
2,2,2245.836364  
2,2,2140.649038  
2,2,2367.384615  
2,2,2361.900000  
2,2,1839.812500  
2,2,1533.840278  
2,2,3965.105263  
2,2,4281.948171  
2,2,13664.571429  
2,2,1896.750000  
2,2,5501.478261  
2,2,2212.700521  
2,2,1831.750000  
2,2,1511.393868  
2,2,4898.317073  
2,2,1660.960526  
2,2,1710.058673

2,2,7554.962766  
2,2,2150.234043  
2,2,3662.323370  
2,2,3453.400735  
2,2,1534.102941  
2,2,1538.153846  
2,2,1727.125000  
2,2,1589.470109  
2,2,2323.600000  
2,2,1630.491667  
2,2,1681.526163  
2,2,1975.681818  
2,2,3177.312500  
2,2,2163.110526  
2,2,1647.335000  
2,2,7392.698718  
2,2,1636.487805  
2,2,2410.469388  
2,2,1657.761628  
2,2,3811.934322  
2,2,2972.331395  
2,2,8363.500000  
2,2,2469.250000  
2,2,3547.250000  
2,2,4053.758523  
2,2,3123.066176  
2,2,2964.214844  
2,2,2446.784091  
2,2,1601.949519  
2,2,3759.668605  
2,2,1825.676829  
2,2,7118.201613  
2,2,3301.097826  
2,2,3607.250000  
2,2,2209.103723  
2,2,2687.000000  
2,2,1825.566667  
2,2,1724.858491  
2,2,4028.408537  
2,2,7500.578125  
2,2,1716.889535  
2,2,6831.562500  
2,2,2802.254902  
2,2,7868.997024  
2,2,6381.593023  
2,2,5959.140625  
2,2,1582.428571  
2,2,2022.455000  
2,2,1648.068182  
2,2,2110.298611  
2,2,2318.724359  
2,2,1814.884615  
2,2,3024.160714  
2,2,1536.409091  
2,2,1657.882353  
2,2,2888.247159  
2,2,2043.589674  
2,2,3972.097222  
2,2,1676.070000  
2,2,2093.221154  
2,2,2483.031915  
2,2,1717.678571  
2,2,2511.411765  
2,2,4318.052632  
2,2,3518.964286  
2,2,1612.004717

2,2,8943.375000  
2,2,1854.500000  
2,2,2497.171053  
2,2,2028.916667  
2,2,2141.547872  
2,2,2031.290000  
2,2,1982.692308  
2,2,2221.955556  
2,2,2089.809659  
2,2,2060.648148  
2,2,5675.422872  
2,2,1856.389671  
2,2,2398.333333  
2,2,4715.954545  
2,2,1989.922170  
2,2,3188.580000  
2,2,3477.988095  
2,2,2246.347826  
2,2,2718.319444  
2,2,10273.674419  
2,2,2225.789474  
2,2,2650.232759  
2,2,7869.730769  
2,2,1613.000000  
2,2,2409.400000  
2,2,1638.424107  
2,2,1650.798469  
2,2,1993.656250  
2,2,3049.000000  
2,2,1985.929245  
2,2,3287.100000  
2,2,1864.048077  
2,2,3861.297872  
2,2,5589.795455  
2,2,1797.641304  
2,2,7163.059524  
2,2,1882.994792  
2,2,3525.555556  
2,2,2595.282609  
2,2,2708.125000  
2,2,1998.026316  
2,2,2202.473684  
2,2,1510.776596  
2,2,1545.500000  
2,2,1574.544872  
2,2,1658.808190  
2,2,2180.747222  
2,2,1619.375000  
2,2,1681.311364  
2,2,3340.138158  
2,2,8648.481481  
2,2,1630.939103  
2,2,2717.105603  
2,2,11504.125000  
2,2,1725.642857  
2,2,8355.353403  
2,2,3362.480000  
2,2,2332.577778  
2,2,2419.081633  
2,2,1511.142857  
2,2,2682.434896  
2,2,2551.409091  
2,2,2289.588235  
2,2,4307.153646  
2,2,1770.627660  
2,2,1569.100000

2,2,4069.338235  
2,2,3123.922280  
2,2,2507.058140  
2,2,2323.743243  
2,2,2411.488372  
2,2,13805.225000  
2,2,2285.156250  
2,2,7469.622340  
2,2,3544.261364  
2,2,3771.260870  
2,2,2022.090426  
2,2,2301.142857  
2,2,5230.241071  
2,2,2468.740385  
2,2,2076.441038  
2,2,1592.336111  
2,2,1544.257812  
2,2,1583.268293  
2,2,1567.187500  
2,2,1773.250000  
2,2,8168.107558  
2,2,1828.323980  
2,2,6730.553125  
2,2,1518.987500  
2,2,1756.941176  
2,2,2323.493590  
2,2,2055.894231  
2,2,1870.423913  
2,2,3604.375000  
2,2,1592.341146  
2,2,2481.345946  
2,2,1910.391892  
2,2,4020.959459  
2,2,1862.901042  
2,2,2166.960000  
2,2,1612.764881  
2,2,2264.710526  
2,2,1593.945122  
2,2,3407.570312  
2,2,2231.799020  
2,2,1584.444079  
2,2,1790.375000  
2,2,1677.640244  
2,2,2740.305000  
2,2,2474.523438  
2,2,2091.058824  
2,2,2070.857143  
2,2,1850.201389  
2,2,2231.797872  
2,2,2527.514706  
2,2,4654.185976  
2,2,1823.110000  
2,2,1626.178571  
2,2,7377.073171  
2,2,2184.048077  
2,2,1754.342593  
2,2,1560.406250  
2,2,8079.807692  
2,2,2018.160377  
2,2,7323.066406  
2,2,2047.867021  
2,2,1529.017857  
2,2,1587.000000  
2,2,2312.380208  
2,2,1736.928910  
2,2,2616.444444

2,2,9670.125000  
2,2,1517.375000  
2,2,4760.000000  
2,2,2318.883721  
2,2,1865.470000  
2,2,4326.661111  
2,2,2789.433824  
2,2,1637.098958  
2,2,2902.028302  
2,2,2872.605978  
2,2,4941.442623  
2,2,3615.169118  
2,2,3660.096429  
2,2,2492.104651  
2,2,18442.820946  
2,2,2854.180851  
2,2,4834.069182  
2,2,1518.034091  
2,2,1525.783333  
2,2,2779.131579  
2,2,2136.822368  
2,2,1585.305556  
2,2,2510.201923  
2,2,6937.125000  
2,2,1577.922872  
2,2,2025.848958  
2,2,2997.777174  
2,2,3329.250000  
2,2,1833.443038  
2,2,1781.162791  
2,2,2219.400000  
2,2,8743.385135  
2,2,2066.736842  
2,2,4167.225000  
2,2,12515.083333  
2,2,2291.594595  
2,2,1806.021875  
2,2,1827.579082  
2,2,3146.265625  
2,2,16254.216216  
2,2,1923.731013  
2,2,5246.985294  
2,2,1636.317568  
2,2,3614.608696  
2,2,2114.627907  
2,2,1652.166667  
2,2,3953.132653  
2,2,1569.391304  
2,2,1855.625000  
2,2,2421.221591  
2,2,1870.331522  
2,2,8243.067568  
2,2,1642.529412  
2,2,8810.318182  
2,2,2325.555288  
2,2,1836.881098  
2,2,2004.822917  
2,2,15399.812500  
2,2,2656.062500  
2,2,1980.189655  
2,2,6043.820122  
2,2,1717.729730  
2,2,2186.275000  
2,2,3557.614362  
2,2,1730.042553  
2,2,4053.164216

2,2,6644.175000  
2,2,1593.320313  
2,2,6691.650000  
2,2,5843.489540  
2,2,4457.706818  
2,2,2967.835106  
2,2,2131.679054  
2,2,3019.000000  
2,2,1635.925532  
2,2,3109.440000  
2,2,1572.394886  
2,2,2814.487805  
2,2,1960.239583  
2,2,2982.305556  
2,2,2379.069444  
2,2,5203.890244  
2,2,4952.962500  
2,2,4403.208333  
2,2,2948.760870  
2,2,8018.733333  
2,2,1744.146341  
2,2,2037.860294  
2,2,1801.840909  
2,2,1548.250000  
2,2,2041.750000  
2,2,2938.024390  
2,2,9072.578947  
2,2,3042.290816  
2,2,1519.892857  
2,2,2577.323661  
2,2,2971.595745  
2,2,3901.500000  
2,2,1538.055556  
2,2,2833.795213  
2,2,2243.615385  
2,2,2611.540816  
2,2,1557.634615  
2,2,3145.048611  
2,2,3297.930233  
2,2,1509.408854  
2,2,3972.294118  
2,2,2587.750000  
2,2,3046.686813  
2,2,8414.687500  
2,2,4158.208333  
2,2,1654.941176  
2,2,3278.680851  
2,2,1969.687500  
2,2,1588.221591  
2,2,3647.419643  
2,2,2098.602041  
2,2,2995.618343  
2,2,13269.636364  
2,2,2372.226064  
2,2,3389.648936  
2,2,2854.940000  
2,2,5023.048913  
2,2,5262.650000  
2,2,7022.232143  
2,2,2059.332447  
2,2,1541.296053  
2,2,1947.702128  
2,2,2042.647727  
2,2,5778.652174  
2,2,2102.228723  
2,2,2959.137500

2,2,2267.061404  
2,2,5178.213415  
2,2,2851.180233  
2,2,1857.142857  
2,2,1975.622340  
2,2,1974.637500  
2,2,3456.613636  
2,2,2744.268617  
2,2,10728.969388  
2,2,1681.220238  
2,2,5845.515625  
2,2,5103.035714  
2,2,4906.981618  
2,2,1864.304688  
2,2,2101.844444  
2,2,1549.550000  
2,2,1563.190341  
2,2,11435.687500  
2,2,2341.134615  
2,2,1828.842105  
2,2,2598.761905  
2,2,1593.988095  
2,2,1743.228723  
2,2,7083.286458  
2,2,1745.125000  
2,2,4436.291667  
2,2,2193.243056  
2,2,19748.104167  
2,2,2380.033784  
2,2,2722.437500  
2,2,2376.000000  
2,2,8224.257812  
2,2,2813.595238  
2,2,1507.532895  
2,2,1780.482759  
2,2,3492.600000  
2,2,6775.549180  
2,2,1976.462500  
2,2,15386.833333  
2,2,1503.863889  
2,2,4000.816489  
2,2,2014.903409  
2,2,2076.109375  
2,2,2079.950000  
2,2,3086.862805  
2,2,2329.355000  
2,2,2273.943396  
2,2,2068.473214  
2,2,3620.190217  
2,2,5246.891667  
2,2,4190.976190  
2,2,2473.735119  
2,2,1957.152027  
2,2,2140.000000  
2,2,6703.541667  
2,2,1540.160714  
2,2,1573.151961  
2,2,3533.469697  
2,2,2687.267045  
2,2,3576.803571  
2,2,1756.972222  
2,2,3953.580357  
2,2,4663.565789  
2,2,9865.021277  
2,2,3669.841912  
2,2,2256.222222

2,2,1634.202128  
2,2,1710.078125  
2,2,2048.882979  
2,2,1968.724432  
2,2,3534.721154  
2,2,3070.559091  
2,2,1667.250000  
2,2,2006.237805  
2,2,5299.311275  
2,2,1900.250000  
2,2,2120.944444  
2,2,1662.948864  
2,2,1661.034722  
2,2,3650.273256  
2,2,2283.925847  
2,2,2198.986979  
2,2,8416.598684  
2,2,2347.619444  
2,2,3064.065789  
2,2,1777.585366  
2,2,1523.922222  
2,2,2137.428571  
2,2,3570.636364  
2,2,2746.590278  
2,2,3224.442935  
2,2,6512.357143  
2,2,1739.954545  
2,2,1852.478659  
2,2,1842.956633  
2,2,2472.954545  
2,2,1923.934211  
2,2,2918.914894  
2,2,3569.333333  
2,2,2999.872093  
2,2,1867.468085  
2,2,1536.375000  
2,2,1531.230114  
2,2,2966.043478  
2,2,1528.568452  
2,2,4905.956395  
2,2,4758.210938  
2,2,2983.358173  
2,2,2912.255556  
2,2,3781.260638  
2,2,1652.235294  
2,2,3387.546875  
2,2,1756.875000  
2,2,4137.990000  
2,2,3692.740385  
2,2,2353.556604  
2,2,2018.323529  
2,2,2827.263889  
2,2,12592.519231  
2,2,3981.120000  
2,2,4252.564904  
2,2,2632.395349  
2,2,1711.182927  
2,2,1925.641026  
2,2,1633.200000  
2,2,2295.816489  
2,2,3900.288889  
2,2,6167.425000  
2,2,1708.540541  
2,2,2262.273026  
2,2,1606.356383  
2,2,1545.099432

2,2,1885.673913  
2,2,3435.232143  
2,2,2122.051829  
2,2,2710.879310  
2,2,3288.840909  
2,2,1638.042553  
2,2,2031.097561  
2,2,3672.556250  
2,2,1776.312500  
2,2,8367.002660  
2,2,3288.732143  
2,2,1884.338068  
2,2,18828.064286  
2,2,2052.779255  
2,2,2576.830357  
2,2,2682.637500  
2,2,1659.369186  
2,2,3042.400000  
2,2,2009.250000  
2,2,6905.433333  
2,2,1954.921053  
2,2,1632.750000  
2,2,2620.333333  
2,2,2226.500000  
2,2,3528.725000  
2,2,1515.990000  
2,2,1727.450000  
2,2,2136.186047  
2,2,5220.105769  
2,2,1869.854167  
2,2,1882.961538  
2,2,1504.000000  
2,2,10012.877551  
2,2,3098.867788  
2,2,2596.584906  
2,2,1637.158537  
2,2,1625.826923  
2,2,2310.538690  
2,2,1604.857143  
2,2,2244.634091  
2,2,2350.937500  
2,2,9082.620283  
2,2,2147.196078  
2,2,2761.761111  
2,2,3260.466102  
2,2,1693.369186  
2,2,1950.692708  
2,2,1838.340426  
2,2,6259.437500  
2,2,13293.830357  
2,2,1811.062500  
2,2,2699.450658  
2,2,1595.984694  
2,2,2769.254545  
2,2,1644.632653  
2,2,6010.872222  
2,2,1638.300000  
2,2,3374.653846  
2,2,1760.229167  
2,2,2359.207317  
2,2,17572.625000  
2,2,2700.243421  
2,2,2839.895161  
2,2,2151.448171  
2,2,2970.473214  
2,2,2801.097561

2,2,5482.795455  
2,2,2172.750000  
2,2,1667.125000  
2,2,6024.870370  
2,2,3902.275568  
2,2,1640.410256  
2,2,4330.166667  
2,2,2001.469388  
2,2,3935.826389  
2,2,5145.906250  
2,2,4697.014706  
2,2,2078.265957  
2,2,3392.706522  
2,2,3188.440476  
2,2,2219.572917  
2,2,3022.717105  
2,2,2073.867925  
2,2,1647.880319  
2,2,2640.314024  
2,2,1503.198529  
2,2,1972.600000  
2,2,1691.198864  
2,2,2135.427083  
2,2,1710.214286  
2,2,7081.133803  
2,2,3008.302632  
2,2,3096.727500  
2,2,1999.352941  
2,2,2183.707317  
2,2,3152.994186  
2,2,1639.677083  
2,2,1598.523810  
2,2,1668.750000  
2,2,2282.559375  
2,2,1859.750000  
2,2,2091.207447  
2,2,7976.851064  
2,2,1650.413462  
2,2,6610.517361  
2,2,2248.567308  
2,2,2177.400000  
2,2,1782.843750  
2,2,1843.633065  
2,2,4971.184211  
2,2,1911.362245  
2,2,2490.160714  
2,2,2624.223404  
2,2,4948.305556  
2,2,1658.604730  
2,2,2276.644231  
2,2,1649.645833  
2,2,2585.062500  
2,2,1680.759615  
2,2,2225.427673  
2,2,2966.637500  
2,2,2067.675000  
2,2,2532.352941  
2,2,2873.312500  
2,2,1823.529412  
2,2,1941.546875  
2,2,3538.714286  
2,2,3209.887821  
2,2,3001.959302  
2,2,1572.872340  
2,2,1970.500000  
2,2,8564.960000

2,2,2366.408163  
2,2,1919.188725  
2,2,2291.005102  
2,2,1870.852041  
2,2,1697.165441  
2,2,1914.552326  
2,2,2261.880435  
2,2,3021.636364  
2,2,2636.246875  
2,2,1726.500000  
2,2,1668.027439  
2,2,1731.427326  
2,2,1800.534483  
2,2,2271.666667  
2,2,5364.600000  
2,2,2429.884146  
2,2,2278.759434  
2,2,1807.771277  
2,2,3748.365625  
2,2,11634.890625  
2,2,2060.570312  
2,2,4830.433036  
2,2,1573.463235  
2,2,2453.475000  
2,2,2690.139535  
2,2,1743.740000  
2,2,1680.755435  
2,2,4007.860795  
2,2,2877.755814  
2,2,1984.759868  
2,2,1533.105114  
2,2,2836.517045  
2,2,4487.368056  
2,2,2030.600000  
2,2,1652.775510  
2,2,1984.137500  
2,2,1964.428571  
2,2,1768.666667  
2,2,5942.365385  
2,2,4594.841837  
2,2,1980.024038  
2,2,2383.517857  
2,2,1874.015075  
2,2,6697.052632  
2,2,2076.276596  
2,2,2696.638393  
2,2,4226.716216  
2,2,2561.444149  
2,2,2009.140625  
2,2,2952.666667  
2,2,1566.733696  
2,2,1572.678977  
2,2,1886.428571  
2,2,2150.163462  
2,2,10587.730556  
2,2,1815.515625  
2,2,1506.959184  
2,2,7967.325521  
2,2,2147.117347  
2,2,2238.638514  
2,2,1794.833333  
2,2,3408.255682  
2,2,1545.914474  
2,2,3161.477500  
2,2,6378.513514  
2,2,19933.795732

2,2,1942.392857  
2,2,2236.160377  
2,2,2419.180233  
2,2,2743.295455  
2,2,1682.545455  
2,2,5900.151515  
2,2,1653.615385  
2,2,4362.384615  
2,2,1623.948171  
2,2,3542.856061  
2,2,3666.616848  
2,2,2847.187500  
2,2,1691.295455  
2,2,1623.994681  
2,2,4516.732759  
2,2,5073.837500  
2,2,2417.826220  
2,2,3334.367021  
2,2,2107.898148  
2,2,3333.000000  
2,2,1693.250000  
2,2,2161.402778  
2,2,2817.627976  
2,2,2240.238971  
2,2,1925.821429  
2,2,5300.547170  
2,2,2290.069853  
2,2,4126.834052  
2,2,1935.837209  
2,2,1583.533333  
2,2,1651.372500  
2,2,3841.156250  
2,2,1710.135870  
2,2,2158.848958  
2,2,2919.179245  
2,2,2347.724138  
2,2,1637.580357  
2,2,2620.764706  
2,2,1507.951531  
2,2,1883.750000  
2,2,1678.226562  
2,2,2553.470588  
2,2,2998.002500  
2,2,2156.313953  
2,2,1947.932432  
2,2,1687.731707  
2,2,11007.875000  
2,2,1663.875000  
2,2,1991.462264  
2,2,6587.514706  
2,2,1757.234043  
2,2,1553.134146  
2,2,2606.602679  
2,2,2160.108696  
2,2,1725.184211  
2,2,1723.118182  
2,2,1584.230769  
2,2,1763.705357  
2,2,1535.256250  
2,2,2414.877155  
2,2,1997.187500  
2,2,1499.578947  
2,2,1670.641026  
2,2,1647.333333  
2,2,2371.622396  
2,2,1795.750000

2,2,2295.946809  
2,2,2387.750000  
2,2,1687.869898  
2,2,1722.413043  
2,2,1588.841346  
2,2,1560.949074  
2,2,9091.647959  
2,2,1795.402174  
2,2,2756.252717  
2,2,3548.414894  
2,2,1684.714286  
2,2,1550.454545  
2,2,1807.550000  
2,2,3931.178125  
2,2,4307.347826  
2,2,1878.451389  
2,2,1966.090909  
2,2,3551.786765  
2,2,3777.240385  
2,2,9824.982143  
2,2,13229.822761  
2,2,2362.093750  
2,2,1893.332317  
2,2,1503.206081  
2,2,2573.339674  
2,2,3869.571429  
2,2,4851.644231  
2,2,2510.294643  
2,2,2278.385870  
2,2,2329.807692  
2,2,1992.570946  
2,2,2375.242188  
2,2,3777.871951  
2,2,4400.326087  
2,2,1526.884615  
2,2,1545.090909  
2,2,1908.544811  
2,2,1559.975000  
2,2,1989.333333  
2,2,9249.236111  
2,2,4221.524194  
2,2,1691.990625  
2,2,1556.713816  
2,2,3771.943878  
2,2,2294.280488  
2,2,2330.209302  
2,2,2311.500000  
2,2,3436.910256  
2,2,1654.590909  
2,2,1721.500000  
2,2,1945.690909  
2,2,2143.743421  
2,2,2065.739130  
2,2,2288.378378  
2,2,2039.727273  
2,2,3570.900000  
2,2,2839.711538  
2,2,12208.570122  
2,2,1756.698980  
2,2,1765.903846  
2,2,1796.489130  
2,2,2917.720000  
2,2,2232.655093  
2,2,3447.333333  
2,2,14125.779762  
2,2,1863.166667

2,2,5126.363636  
2,2,2072.531250  
2,2,1849.600000  
2,2,2595.660377  
2,2,1599.593750  
2,2,1510.250000  
2,2,3551.663043  
2,2,2259.875000  
2,2,1556.627660  
2,2,3975.760204  
2,2,2221.850000  
2,2,2353.375000  
2,2,1507.625000  
2,2,6733.416667  
2,2,1622.318182  
2,2,2353.375000  
2,2,3892.433824  
2,2,3339.633333  
2,2,1512.516667  
2,2,2032.187500  
2,2,1829.183333  
2,2,11237.750000  
2,2,1504.220588  
2,2,4095.040761  
2,2,2035.765244  
2,2,1615.459302  
2,2,2230.781250  
2,2,2361.012295  
2,2,3291.629630  
2,2,1807.011905  
2,2,2738.641509  
2,2,5913.546053  
2,2,3187.427778  
2,2,4231.466667  
2,2,4080.729730  
2,2,1870.489362  
2,2,2973.400000  
2,2,3072.542857  
2,2,8135.909091  
2,2,6418.076923  
2,2,2336.487310  
2,2,3121.958333  
2,2,3715.559659  
2,2,2272.357500  
2,2,8153.857143  
2,2,1682.776163  
2,2,2876.468085  
2,2,1566.750000  
2,2,1519.747093  
2,2,1512.568627  
2,2,1785.044944  
2,2,2465.153631  
2,2,1583.055556  
2,2,4265.303125  
2,2,2448.089286  
2,2,2459.691327  
2,2,1588.648438  
2,2,1871.835227  
2,2,1894.906250  
2,2,1827.781250  
2,2,1618.591837  
2,2,1808.184375  
2,2,2889.952500  
2,2,2921.221591  
2,2,6097.808511  
2,2,1717.409091

2,2,1737.370370  
2,2,5092.455128  
2,2,2687.678571  
2,2,1712.612745  
2,2,1864.433824  
2,2,1577.809783  
2,2,2209.828125  
2,2,3361.871324  
2,2,3532.116279  
2,2,2832.428571  
2,2,1581.115385  
2,2,1823.222222  
2,2,2505.848837  
2,2,1559.681818  
2,2,14245.204082  
2,2,1938.072917  
2,2,1842.826087  
2,2,1854.835366  
2,2,1768.855932  
2,2,4507.500000  
2,2,2401.750000  
2,2,2270.804348  
2,2,2385.687500  
2,2,1614.000000  
2,2,2001.062500  
2,2,1680.500000  
2,2,1616.997642  
2,2,1872.815789  
2,2,2979.826923  
2,2,10023.081250  
2,2,2227.812500  
2,2,4367.662500  
2,2,1828.622549  
2,2,2481.739583  
2,2,2509.125000  
2,2,1531.231707  
2,2,1703.313830  
2,2,12340.875000  
2,2,2648.167614  
2,2,3322.787234  
2,2,2189.838235  
2,2,2027.642857  
2,2,1983.360465  
2,2,13221.371622  
2,2,10900.984649  
2,2,4269.933333  
2,2,2464.684524  
2,2,2608.118902  
2,2,2585.857143  
2,2,2687.040000  
2,2,2546.018868  
2,2,1910.035176  
2,2,4417.833333  
2,2,2660.179688  
2,2,3200.000000  
2,2,3297.871711  
2,2,4155.842500  
2,2,3399.049020  
2,2,3938.358696  
2,2,3301.577519  
2,2,2361.250000  
2,2,2723.203125  
2,2,2514.421875  
2,2,1999.922705  
2,2,6781.300000  
2,2,6798.441860

2,2,3766.687500  
2,2,2781.982143  
2,2,3892.813830  
2,2,1597.445312  
2,2,7710.310897  
2,2,17590.243243  
2,2,2156.798077  
2,2,1509.960526  
2,2,1620.520000  
2,2,1934.928191  
2,2,1564.789474  
2,2,3270.500000  
2,2,1523.647541  
2,2,1572.752315  
2,2,2304.044872  
2,2,2702.340580  
2,2,1636.871795  
2,2,1968.900000  
2,2,6976.156250  
2,2,2979.511628  
2,2,1565.093750  
2,2,2484.520408  
2,2,1568.656818  
2,2,1930.125000  
2,2,4515.429878  
2,2,3488.358974  
2,2,2872.728365  
2,2,2764.138298  
2,2,3930.017857  
2,2,7446.586207  
2,2,5397.240196  
2,2,1615.858553  
2,2,2414.857143  
2,2,1777.878049  
2,2,3538.117500  
2,2,13657.000000  
2,2,13369.372549  
2,2,2125.595588  
2,2,5262.396739  
2,2,2696.666667  
2,2,2715.040000  
2,2,3157.255319  
2,2,1697.630952  
2,2,1955.375000  
2,2,3395.203125  
2,2,2902.028646  
2,2,1750.450000  
2,2,4633.120283  
2,2,1823.453125  
2,2,1537.755435  
2,2,15640.400000  
2,2,17993.763158  
2,2,3604.875000  
2,2,2192.504902  
2,2,2580.419643  
2,2,7680.314394  
2,2,1590.367021  
2,2,2767.488889  
2,2,1515.897959  
2,2,15744.560484  
2,2,2808.285714  
2,2,17898.694444  
2,2,3921.707317  
2,2,1601.000000  
2,2,2082.040816  
2,2,2079.895349

2,2,1814.102041  
2,2,3657.847826  
2,2,3195.811047  
2,2,2242.842262  
2,2,1528.845238  
2,2,5568.986979  
2,2,2325.230366  
2,2,2265.000000  
2,2,1502.932065  
2,2,1654.697917  
2,2,2488.279070  
2,2,1686.078125  
2,2,4280.265152  
2,2,5337.834302  
2,2,3604.415625  
2,2,3003.875000  
2,2,1809.562500  
2,2,1516.312500  
2,2,2847.769231  
2,2,2023.076923  
2,2,2259.410000  
2,2,1653.255952  
2,2,4445.578947  
2,2,2538.625000  
2,2,2446.051282  
2,2,2078.250000  
2,2,1923.339286  
2,2,2818.116279  
2,2,3136.000000  
2,2,2131.285714  
2,2,2489.016827  
2,2,1739.339674  
2,2,2391.683824  
2,2,2553.500000  
2,2,1822.437500  
2,2,1612.656250  
2,2,1898.415816  
2,2,4113.827225  
2,2,2816.019737  
2,2,8534.361702  
2,2,1535.965909  
2,2,1877.483696  
2,2,1743.244565  
2,2,2643.471698  
2,2,2077.439252  
2,2,3149.177500  
2,2,2287.321023  
2,2,2670.268519  
2,2,1548.050676  
2,2,1989.370283  
2,2,8032.505025  
2,2,14546.434783  
2,2,3863.113281  
2,2,2266.380952  
2,2,1666.565217  
2,2,14108.533333  
2,2,2144.555288  
2,2,1976.125000  
2,2,2912.380435  
2,2,3159.657895  
2,2,1529.529891  
2,2,2596.941327  
2,2,14169.537500  
2,2,3002.013158  
2,2,1523.901163  
2,2,1583.707317

2,2,4510.793478  
2,2,2374.519737  
2,2,3348.787500  
2,2,1678.283019  
2,2,4408.382979  
2,2,2407.441176  
2,2,4551.000000  
2,2,1629.642241  
2,2,1699.700000  
2,2,2886.333333  
2,2,2267.095238  
2,2,2060.333333  
2,2,1711.046569  
2,2,2773.250000  
2,2,1608.196429  
2,2,1667.504167  
2,2,1865.261905  
2,2,2313.100000  
2,2,1532.811224  
2,2,3911.843750  
2,2,1754.162234  
2,2,1600.350000  
2,2,2978.932927  
2,2,1713.536585  
2,2,3449.178571  
2,2,2630.927632  
2,2,2010.335366  
2,2,2493.035714  
2,2,3750.750000  
2,2,1778.138889  
2,2,4718.355263  
2,2,3100.500000  
2,2,2265.107143  
2,2,1659.099432  
2,2,4988.220930  
2,2,1855.442308  
2,2,2600.562500  
2,2,1671.082447  
2,2,4047.850000  
2,2,1574.276596  
2,2,1534.743902  
2,2,2113.152778  
2,2,3633.113208  
2,2,4452.752660  
2,2,2066.205128  
2,2,3367.000000  
2,2,1991.235849  
2,2,3377.750000  
2,2,1774.887500  
2,2,1770.861111  
2,2,2056.025641  
2,2,7688.395408  
2,2,2938.438889  
2,2,2523.057500  
2,2,2374.446023  
2,2,3281.358333  
2,2,3066.822917  
2,2,7346.608173  
2,2,4593.562500  
2,2,1701.555000  
2,2,1746.845109  
2,2,1890.530612  
2,2,2798.955556  
2,2,1929.742500  
2,2,3764.787234  
2,2,1986.781250

2,2,2284.890625  
2,2,3980.189286  
2,2,2337.285714  
2,2,1719.000000  
2,2,1638.757764  
2,2,1881.368902  
2,2,2425.755435  
2,2,2317.141304  
2,2,1843.406780  
2,2,2652.436321  
2,2,7171.440000  
2,2,2543.204082  
2,2,2308.550000  
2,2,18577.196429  
2,2,15199.826389  
2,2,1725.857843  
2,2,2016.436170  
2,2,4134.350962  
2,2,2807.872500  
2,2,6942.937500  
2,2,2291.212209  
2,2,2877.512195  
2,2,6752.620370  
2,2,1531.298077  
2,2,2186.558140  
2,2,2900.371951  
2,2,3158.257353  
2,2,2500.858974  
2,2,1581.348837  
2,2,5059.826087  
2,2,3860.764706  
2,2,2801.915000  
2,2,2082.625000  
2,2,11297.402439  
2,2,2230.515306  
2,2,1555.002660  
2,2,4353.726562  
2,2,1786.663462  
2,2,3492.075000  
2,2,1691.407609  
2,2,8237.547619  
2,2,1946.526316  
2,2,4743.839744  
2,2,1501.787500  
2,2,3599.038462  
2,2,2558.300000  
2,2,2481.801020  
2,2,1747.161765  
2,2,2849.235000  
2,2,1597.317857  
2,2,5333.398148  
2,2,5057.144444  
2,2,2211.243421  
2,2,18549.679245  
2,2,7127.302500  
2,2,3508.924528  
2,2,2568.910714  
2,2,1873.062500  
2,2,4788.510204  
2,2,12288.444712  
2,2,1860.625000  
2,2,1931.207317  
2,2,9132.003378  
2,2,9362.517361  
2,2,4761.755319  
2,2,3274.078947

2,2,1759.062500  
2,2,1780.679878  
2,2,1554.883871  
2,2,1678.410714  
2,2,1887.521552  
2,2,2855.946875  
2,2,2068.652174  
2,2,2234.065476  
2,2,3493.039773  
2,2,2690.636364  
2,2,2867.580357  
2,2,2102.138889  
2,2,6230.600490  
2,2,1711.680556  
2,2,2399.642857  
2,2,2237.294118  
2,2,2136.127551  
2,2,3569.327128  
2,2,8101.395349  
2,2,2820.298780  
2,2,3167.590426  
2,2,1723.687500  
2,2,2694.500000  
2,2,1533.857955  
2,2,2819.463542  
2,2,2944.812500  
2,2,2873.357143  
2,2,1502.530660  
2,2,4519.066667  
2,2,1656.521875  
2,2,2244.330189  
2,2,1740.658784  
2,2,1583.147959  
2,2,5447.304245  
2,2,5034.965909  
2,2,1736.673469  
2,2,3053.875000  
2,2,2026.159091  
2,2,1558.764706  
2,2,6582.829268  
2,2,2836.535714  
2,2,2533.470238  
2,2,1679.351562  
2,2,5330.551282  
2,2,2567.877778  
2,2,2235.246795  
2,2,5950.427083  
2,2,2722.531250  
2,2,3906.529605  
2,2,2650.133721  
2,2,1887.585366  
2,2,1902.601190  
2,2,5542.768750  
2,2,12334.990196  
2,2,1945.414062  
2,2,3482.903125  
2,2,5632.574468  
2,2,1747.761905  
2,2,2433.877551  
2,2,4983.614130  
2,2,1997.449519  
2,2,2062.174419  
2,2,2071.992788  
3,1,3074.189189  
3,1,14221.070513  
3,1,1616.517241

3,1,2906.228261  
3,1,2188.875000  
3,1,3816.896341  
3,1,1834.147436  
3,1,2327.970588  
3,1,3062.103723  
3,1,4260.729167  
3,1,11309.989130  
3,1,6439.057292  
3,1,2175.356250  
3,1,2379.506579  
3,1,3344.020161  
3,1,1840.770833  
3,1,2499.091667  
3,1,2815.578125  
3,1,3860.009375  
3,1,7581.320000  
3,1,1970.393750  
3,1,3219.961538  
3,1,15782.125000  
3,1,4705.821429  
3,1,4656.702381  
3,1,10077.033088  
3,1,2790.000000  
3,1,1605.975000  
3,1,19476.256757  
3,1,2675.682927  
3,1,1677.051471  
3,1,3114.463235  
3,1,3713.629630  
3,1,18349.331522  
3,1,1869.766447  
3,1,3783.855769  
3,1,2747.941489  
3,1,2078.441176  
3,1,2710.258929  
3,1,1593.546429  
3,1,4103.919444  
3,1,15231.500000  
3,1,2171.333333  
3,1,2039.000000  
3,1,6668.908654  
3,1,1717.521739  
3,1,2810.046053  
3,1,1705.588235  
3,1,6782.300000  
3,1,2131.723404  
3,1,3242.944444  
3,1,8144.000000  
3,1,5970.427083  
3,1,1510.705357  
3,1,2582.571429  
3,1,2020.728125  
3,1,2410.988372  
3,1,1609.760870  
3,1,5097.579545  
3,1,1820.794872  
3,1,7019.000000  
3,1,1570.633333  
3,1,2245.291667  
3,1,5488.263158  
3,1,5614.478261  
3,1,2092.108871  
3,1,1682.728261  
3,1,3546.070313  
3,1,2636.869565

3,1,2903.578431  
3,1,2140.127660  
3,1,2862.266234  
3,1,2396.692308  
3,1,2276.932692  
3,1,15142.666667  
3,1,6829.420290  
3,1,13068.226351  
3,1,1724.250000  
3,1,3239.380952  
3,1,1518.270833  
3,1,3423.768116  
3,1,1846.649254  
3,1,2448.194444  
3,1,2730.704545  
3,1,3484.284884  
3,1,6993.487179  
3,1,4328.296875  
3,1,3584.661290  
3,1,2101.732143  
3,1,2604.209239  
3,1,4650.595000  
3,1,1858.264706  
3,1,3526.256579  
3,1,3346.021277  
3,1,5164.740625  
3,1,3857.923913  
3,1,1785.560976  
3,1,6698.417763  
3,1,7444.722222  
3,1,6441.184211  
3,1,10226.128205  
3,1,1783.106618  
3,1,2344.487179  
3,1,1779.470588  
3,1,2684.434211  
3,1,9021.550000  
3,1,2386.325581  
3,1,2010.757353  
3,1,10464.540541  
3,1,2608.511628  
3,1,2112.250000  
3,1,2910.857143  
3,1,9670.940972  
3,1,6795.133333  
3,1,11766.437500  
3,1,1982.625000  
3,1,4870.934783  
3,1,3415.370370  
3,1,5882.000000  
3,1,4487.742857  
3,1,3382.278846  
3,1,2933.404605  
3,1,1662.230769  
3,1,4921.534884  
3,1,1904.141026  
3,1,10811.363636  
3,1,3506.720395  
3,1,3160.380000  
3,1,3766.382653  
3,1,4367.850000  
3,1,1746.036932  
3,1,17006.631944  
3,1,6055.979167  
3,1,2225.564286  
3,1,2004.400000

3,1,16778.966102  
3,1,8220.328571  
3,1,4952.441176  
3,1,1967.984375  
3,1,5887.041667  
3,1,3363.147059  
3,1,3054.942308  
3,1,3255.366667  
3,1,1683.400000  
3,1,3787.517442  
3,1,3163.574324  
3,1,2935.074074  
3,1,3236.297297  
3,1,4617.802419  
3,1,1997.000000  
3,1,3836.000000  
3,1,2570.388889  
3,1,5979.225000  
3,1,13464.766892  
3,1,12150.483333  
3,1,1958.256098  
3,1,2644.390000  
3,1,4226.272727  
3,1,11239.319444  
3,1,8200.643939  
3,1,1955.036932  
3,1,9097.353741  
3,1,3038.743750  
3,1,4062.202703  
3,1,6479.618182  
3,1,1605.325581  
3,1,12233.380000  
3,1,1718.055556  
3,1,8351.902439  
3,1,6451.923077  
3,1,9726.829787  
3,1,2944.400641  
3,1,3956.972973  
3,1,1846.220000  
3,1,4854.239362  
3,1,14713.301471  
3,1,2234.721591  
3,1,3506.670455  
3,1,2158.285714  
3,1,1671.857143  
3,1,4415.935897  
3,1,2177.432432  
3,1,2143.945122  
3,1,4276.500000  
3,1,2424.291667  
3,1,1776.308824  
3,1,2733.098485  
3,1,10762.522727  
3,1,2174.725000  
3,1,6373.228571  
3,1,2011.054688  
3,1,1940.875000  
3,1,10092.687500  
3,1,17183.841216  
3,1,2136.326923  
3,1,5239.270000  
3,1,6287.550000  
3,1,5089.424419  
3,1,2873.104167  
3,1,2251.815476  
3,1,2063.567935

3,1,3237.312500  
3,1,5194.695652  
3,1,2531.206250  
3,1,14635.674479  
3,1,2090.204545  
3,1,2127.000000  
3,1,2677.664634  
3,1,8897.406250  
3,1,6654.573171  
3,1,1995.807927  
3,1,4615.166667  
3,1,1917.877907  
3,1,1779.425676  
3,1,3458.046053  
3,1,3389.443182  
3,1,2947.920833  
3,1,1885.454545  
3,1,9566.378676  
3,1,2716.243902  
3,1,1949.307692  
3,1,11484.058824  
3,1,5166.101124  
3,1,1518.780405  
3,1,1979.877841  
3,1,7451.390625  
3,1,1727.305556  
3,1,7939.805147  
3,1,3910.205357  
3,1,2047.159722  
3,1,11336.262931  
3,1,1763.825000  
3,1,9562.216667  
3,1,4859.714286  
3,1,4311.500000  
3,1,3187.953125  
3,1,2615.028846  
3,1,2568.328704  
3,1,2647.315000  
3,1,6178.209302  
3,1,3033.500000  
3,1,4054.500000  
3,1,4918.659483  
3,1,5310.933333  
3,1,3193.911765  
3,1,3789.527027  
3,1,4783.487179  
3,1,3876.564286  
3,1,9929.450000  
3,1,10449.826087  
3,1,3151.392857  
3,1,4674.263158  
3,1,1988.888158  
3,1,17370.236111  
3,1,2529.507812  
3,1,2941.321429  
3,1,2603.758333  
3,1,1891.036184  
3,1,5147.859375  
3,1,5325.572674  
3,1,2331.112179  
3,1,2146.147059  
3,1,2778.335106  
3,1,2365.266667  
3,1,12630.071875  
3,1,7327.368421  
3,1,19526.973684

3,1,11773.705882  
3,1,2752.343750  
3,1,2629.250000  
3,1,1515.580882  
3,1,3120.505952  
3,1,5777.625000  
3,1,2461.015244  
3,1,3683.615385  
3,1,2733.214744  
3,1,1768.784884  
3,1,3523.596591  
3,1,2117.696023  
3,1,2625.600000  
3,1,4116.880952  
3,1,4961.326613  
3,1,2267.234375  
3,1,7747.050000  
3,1,8394.721154  
3,1,2175.928571  
3,1,4251.644531  
3,1,3478.192308  
3,1,1913.809524  
3,1,4023.223214  
3,1,7490.593750  
3,1,3266.646429  
3,1,2139.760638  
3,1,2906.008721  
3,1,8436.827778  
3,1,10746.422794  
3,1,1558.265625  
3,1,3059.279891  
3,1,18130.323370  
3,1,1927.914634  
3,1,18127.539634  
3,1,2081.756410  
3,1,5775.562500  
3,1,2417.325581  
3,1,1686.343750  
3,1,6819.939189  
3,1,3935.164474  
3,1,6395.284375  
3,1,1620.135417  
3,1,8431.000000  
3,1,1938.173913  
3,1,2460.744444  
3,1,3293.750000  
3,1,7761.062500  
3,1,5106.497093  
3,1,5187.125000  
3,1,2499.312500  
3,1,2103.365385  
3,1,5836.250000  
3,1,3139.183333  
3,1,7158.500000  
3,1,6079.666667  
3,1,8714.720588  
3,1,5731.092105  
3,1,3050.152778  
3,1,2811.779762  
3,1,4043.372159  
3,1,3956.340426  
3,1,2813.273649  
3,1,10905.538462  
3,1,4521.460106  
3,1,11181.013736  
3,1,2825.705882

3,1,3578.496622  
3,1,3298.947368  
3,1,1576.193878  
3,1,10893.022727  
3,1,7980.580128  
3,1,5578.132353  
3,1,3124.000000  
3,1,5336.443182  
3,1,4833.851852  
3,1,1509.031250  
3,1,9538.162162  
3,1,11584.500000  
3,1,3831.269531  
3,1,2179.725610  
3,1,16366.550000  
3,1,6887.148649  
3,1,2306.888514  
3,1,13460.285156  
3,1,3157.625000  
3,1,4357.570833  
3,1,10503.504808  
3,1,17383.717949  
3,1,8387.461806  
3,1,1932.020833  
3,1,6175.633721  
3,1,1719.856618  
3,1,8825.494898  
3,1,4102.333333  
3,1,2085.900735  
3,1,2162.992366  
3,1,3763.678571  
3,1,2430.157895  
3,1,2317.454545  
3,1,1829.500000  
3,1,7211.687500  
3,1,1628.016129  
3,1,3392.191176  
3,1,2092.195122  
3,1,5015.263158  
3,1,2704.750000  
3,1,6837.625000  
3,1,2928.110119  
3,1,3979.916667  
3,1,17062.515625  
3,1,3253.857639  
3,1,12846.528846  
3,1,14470.377976  
3,1,4526.663462  
3,1,2211.524038  
3,1,2339.103659  
3,1,4038.365385  
3,1,2925.500000  
3,1,2156.461538  
3,1,2115.923077  
3,1,17797.805556  
3,1,2045.659574  
3,1,5231.000000  
3,1,2701.023810  
3,1,8685.769697  
3,1,1727.821429  
3,1,9856.534483  
3,1,3745.027344  
3,1,9890.343750  
3,1,3781.235294  
3,1,4434.562500  
3,1,1562.671875

3,1,2973.744898  
3,1,3135.012019  
3,1,3616.907895  
3,1,4567.959302  
3,1,4134.662162  
3,1,5161.982143  
3,1,3593.096774  
3,1,3313.600000  
3,1,1651.228125  
3,1,1519.363095  
3,1,18675.209459  
3,1,2276.385870  
3,1,10029.434783  
3,1,5087.628676  
3,1,1919.157895  
3,1,5612.806452  
3,1,5815.350000  
3,1,4524.640000  
3,1,3247.195122  
3,1,3493.595238  
3,1,15391.860795  
3,1,1875.257812  
3,1,2932.066860  
3,1,9391.913194  
3,1,2613.959459  
3,1,5994.522222  
3,1,3370.503378  
3,1,18489.424419  
3,1,1716.831250  
3,1,3386.866667  
3,1,5391.102273  
3,1,2546.513158  
3,1,9160.012195  
3,1,1577.339286  
3,1,2311.382353  
3,1,1763.029412  
3,1,10893.695122  
3,1,5738.318182  
3,1,6508.041667  
3,1,4273.834239  
3,1,7278.136364  
3,1,6165.244318  
3,1,15979.461538  
3,1,9411.358333  
3,1,5666.002717  
3,1,4961.195122  
3,1,7112.909091  
3,1,1583.958333  
3,1,2545.559783  
3,1,15468.964286  
3,1,10624.500000  
3,1,2886.543478  
3,1,3341.690217  
3,1,1924.800000  
3,1,1659.818548  
3,1,1889.698370  
3,1,7519.801282  
3,1,1796.583333  
3,1,5367.100000  
3,1,1716.511905  
3,1,2814.562500  
3,1,1606.669444  
3,1,2378.500000  
3,1,5751.687500  
3,1,2637.210938  
3,1,1507.683824

3,1,5261.841912  
3,1,1643.085366  
3,1,3672.787234  
3,1,3723.875000  
3,1,3324.028846  
3,1,5228.750000  
3,1,3781.194079  
3,1,9037.213816  
3,1,1784.375000  
3,1,18097.815789  
3,1,4995.368750  
3,1,4283.804878  
3,1,1610.715116  
3,1,3255.741071  
3,1,10226.125000  
3,1,4570.250000  
3,1,4640.000000  
3,1,8770.192857  
3,1,2834.963415  
3,1,8168.666667  
3,1,2035.476190  
3,1,2166.183333  
3,1,6220.997093  
3,1,16049.431548  
3,1,3617.534091  
3,1,2726.981250  
3,1,4236.469512  
3,1,1556.325581  
3,1,11679.344595  
3,1,1924.848485  
3,1,4705.900943  
3,1,2156.309524  
3,1,3163.558824  
3,1,3760.172794  
3,1,2415.121212  
3,1,2637.475000  
3,1,7012.268617  
3,1,2346.411765  
3,1,3093.220000  
3,1,2287.670391  
3,1,2460.750000  
3,1,3644.329268  
3,1,15994.570513  
3,1,7325.475000  
3,1,3065.237903  
3,1,4178.266667  
3,1,1785.058824  
3,1,2677.903846  
3,1,2047.196429  
3,1,5489.272727  
3,1,6527.582317  
3,1,1539.596591  
3,1,2165.780303  
3,1,2302.272727  
3,1,2484.253676  
3,1,2046.467949  
3,1,3797.104651  
3,1,1517.166667  
3,1,5611.416667  
3,1,8020.715116  
3,1,3546.250000  
3,1,2594.424419  
3,1,6289.676829  
3,1,4454.678571  
3,1,2978.385714  
3,1,2863.107143

3,1,5355.217742  
3,1,4849.500000  
3,1,1528.041667  
3,1,3341.065000  
3,1,1820.852041  
3,1,3747.636364  
3,1,3247.125000  
3,1,3920.302326  
3,1,2180.264881  
3,1,8552.594595  
3,1,3528.807692  
3,1,6578.528409  
3,1,3179.473684  
3,1,2317.803030  
3,1,1962.294118  
3,1,1792.650735  
3,1,4045.714286  
3,1,2351.265244  
3,1,2938.448864  
3,1,6199.089674  
3,1,4230.617647  
3,1,1927.736842  
3,1,2265.255814  
3,1,7806.697674  
3,1,2541.975610  
3,1,2115.925000  
3,1,4190.825000  
3,1,1800.000000  
3,1,1537.825581  
3,1,2761.617647  
3,1,2971.514423  
3,1,2830.000000  
3,1,19476.547619  
3,1,2870.236842  
3,1,6980.288889  
3,1,9748.187500  
3,1,4767.021277  
3,1,2944.640625  
3,1,3525.113281  
3,1,2685.500000  
3,1,2762.625000  
3,1,1502.446809  
3,1,3667.444444  
3,1,6502.808824  
3,1,3713.707317  
3,1,2186.535256  
3,1,2425.451389  
3,1,4254.397436  
3,1,6666.106383  
3,1,3168.238281  
3,1,6805.500000  
3,1,3711.159091  
3,1,1544.738372  
3,1,3670.460000  
3,1,2475.040541  
3,1,1701.107558  
3,1,13344.109375  
3,1,3230.125000  
3,1,7853.584559  
3,1,3022.657609  
3,1,6346.856250  
3,1,2159.503788  
3,1,4176.337500  
3,1,1524.035714  
3,1,7912.416667  
3,1,2543.133721

3,1,3932.506579  
3,1,3996.116667  
3,1,2160.625000  
3,1,4081.500000  
3,1,3446.073529  
3,1,3719.937500  
3,1,4035.659091  
3,1,1815.750000  
3,1,2220.221591  
3,1,1954.675595  
3,1,4833.625000  
3,1,4333.237500  
3,1,19347.375000  
3,1,8757.953125  
3,1,1844.476064  
3,1,2526.970930  
3,1,14537.867188  
3,1,2930.000000  
3,1,2512.917476  
3,1,4370.031915  
3,1,3028.714286  
3,1,16120.583333  
3,1,4529.750000  
3,1,2945.197368  
3,1,4049.266667  
3,1,1509.076923  
3,1,3108.263158  
3,1,12487.000000  
3,1,9164.323718  
3,1,4580.791667  
3,1,2988.689286  
3,1,6850.392857  
3,1,2645.468750  
3,1,1557.514881  
3,1,1864.353659  
3,1,4892.625000  
3,1,2352.800000  
3,1,4213.159375  
3,1,2533.184211  
3,1,10179.687500  
3,1,9306.396341  
3,1,19076.834821  
3,1,1726.941176  
3,1,2093.838710  
3,1,7543.908333  
3,1,2442.359375  
3,1,8507.537234  
3,1,1837.588235  
3,1,1640.125000  
3,1,10344.166667  
3,1,1771.000000  
3,1,6110.340909  
3,1,6650.034483  
3,1,2383.958333  
3,1,2686.847222  
3,1,2160.805851  
3,1,2380.750000  
3,1,1967.081250  
3,1,2956.460843  
3,1,2207.726562  
3,1,3802.285714  
3,1,3847.823529  
3,1,4242.578571  
3,1,15542.689189  
3,1,9000.554878  
3,1,3259.152439

3,1,1846.109375  
3,1,2138.693750  
3,1,1659.401163  
3,1,3261.782895  
3,1,2057.383333  
3,1,3744.250000  
3,1,1848.068182  
3,1,12110.261905  
3,1,2601.789773  
3,1,2615.026316  
3,1,19286.294872  
3,1,3361.250000  
3,1,1963.524194  
3,1,5180.977273  
3,1,2214.347973  
3,1,2872.978571  
3,1,3722.073529  
3,1,3136.666667  
3,1,2476.132353  
3,1,1616.695000  
3,1,2135.896552  
3,1,12585.452778  
3,1,3103.479730  
3,1,3267.029605  
3,1,1846.737805  
3,1,2053.842105  
3,1,5979.823529  
3,1,9680.111111  
3,1,1989.960714  
3,1,2715.183824  
3,1,1736.642857  
3,1,10005.875000  
3,1,2270.081081  
3,1,7646.444444  
3,1,3329.883065  
3,1,5508.078125  
3,1,1802.905488  
3,1,2470.958333  
3,1,2142.788462  
3,1,2642.375000  
3,1,10000.234043  
3,1,2625.346591  
3,1,9932.017857  
3,1,13035.791667  
3,1,5939.347826  
3,1,6322.742647  
3,1,2918.273256  
3,1,4646.809783  
3,1,2856.354167  
3,1,5549.711538  
3,1,2204.288462  
3,1,4063.331250  
3,1,3216.242188  
3,1,1866.458333  
3,1,3655.157609  
3,1,8794.718750  
3,1,3425.716346  
3,1,3001.000000  
3,1,4746.836957  
3,1,2016.730469  
3,1,2586.213068  
3,1,2753.157895  
3,1,5194.022059  
3,1,3952.837209  
3,1,5721.463235  
3,1,2425.254464

3,1,5212.113095  
3,1,5516.856771  
3,1,11510.280488  
3,1,2095.182143  
3,1,1770.909722  
3,1,3589.521739  
3,1,2415.225000  
3,1,12382.125000  
3,1,7526.718750  
3,1,11715.886111  
3,1,1572.713068  
3,1,4249.649254  
3,1,2134.294944  
3,1,4689.541667  
3,1,1670.291667  
3,1,6637.155556  
3,1,5597.250000  
3,1,1995.026596  
3,1,11101.272727  
3,1,1892.604167  
3,1,7031.846154  
3,1,3749.335526  
3,1,1598.513514  
3,1,4055.625000  
3,1,13407.304245  
3,1,3646.068182  
3,1,1646.065476  
3,1,1642.989130  
3,1,4244.256757  
3,1,1718.800000  
3,1,1599.781250  
3,1,3151.807065  
3,1,3207.125000  
3,1,2287.322581  
3,1,6526.175000  
3,1,11937.543605  
3,1,5164.139881  
3,1,1883.806818  
3,1,3687.296053  
3,1,4680.875000  
3,1,11166.190789  
3,1,1669.098214  
3,1,3972.633929  
3,1,7394.000000  
3,1,1607.898649  
3,1,3010.402174  
3,1,14493.515351  
3,1,5218.016129  
3,1,1521.809783  
3,1,5681.529412  
3,1,5125.437500  
3,1,2928.953125  
3,1,2838.760000  
3,1,3028.443750  
3,1,1550.262821  
3,1,4803.433594  
3,1,2032.500000  
3,1,4289.092262  
3,1,2269.832386  
3,1,6221.734375  
3,1,2749.205882  
3,1,2142.951220  
3,1,2819.712838  
3,1,1511.951220  
3,1,1517.863281  
3,1,5413.202381

3,1,4816.625000  
3,1,2173.000000  
3,1,2509.875000  
3,1,2204.828125  
3,1,11232.890244  
3,1,2548.369898  
3,1,5499.534722  
3,1,1980.869444  
3,1,3157.687500  
3,1,2159.200658  
3,1,1598.882353  
3,1,1714.775000  
3,1,1742.809375  
3,1,15663.783333  
3,1,6781.307065  
3,1,2809.414062  
3,1,12510.553571  
3,1,9686.687500  
3,1,1556.666667  
3,1,17717.701923  
3,1,2310.019531  
3,1,2824.444444  
3,1,5194.666667  
3,1,1669.673077  
3,1,3595.723214  
3,1,2785.239865  
3,1,3294.866935  
3,1,1663.208333  
3,1,1681.682927  
3,1,3333.189189  
3,1,3395.597826  
3,1,9593.392442  
3,1,4459.347826  
3,1,11858.542683  
3,1,4294.421875  
3,1,2351.300000  
3,1,2054.982143  
3,1,2507.005682  
3,1,3907.875000  
3,1,9883.578947  
3,1,2145.247159  
3,1,2729.346154  
3,1,4071.291667  
3,1,2434.190476  
3,1,12125.193182  
3,1,7527.085714  
3,1,2321.758065  
3,1,5942.348958  
3,1,2221.114362  
3,1,2762.750000  
3,1,1745.635870  
3,1,4661.655172  
3,1,2358.243243  
3,1,1541.072368  
3,1,3378.261364  
3,1,1768.750000  
3,1,8468.787879  
3,1,3548.871951  
3,1,4144.452586  
3,1,2387.000000  
3,1,2900.461538  
3,1,3122.214286  
3,1,2138.620192  
3,1,6519.103261  
3,1,10423.073529  
3,1,7451.872340

3,1,3108.106061  
3,1,3507.402439  
3,1,1678.973684  
3,1,2517.136364  
3,1,2982.833333  
3,1,14228.000000  
3,1,3676.500000  
3,1,12871.062500  
3,1,5179.160714  
3,1,4808.939655  
3,1,5388.545455  
3,1,1649.000000  
3,1,8213.863636  
3,1,2814.625000  
3,1,1509.252717  
3,1,1565.727273  
3,1,4446.156250  
3,1,2254.885246  
3,1,1520.031915  
3,1,2936.000000  
3,1,1872.434211  
3,1,2678.687500  
3,1,2083.896341  
3,1,6562.532051  
3,1,12548.540441  
3,1,3571.653846  
3,1,13784.926136  
3,1,7675.260870  
3,1,1902.214286  
3,1,1902.842391  
3,1,4516.722222  
3,1,2674.242647  
3,1,4747.767857  
3,1,1933.325893  
3,1,3542.181250  
3,1,14071.671875  
3,1,1651.234043  
3,1,10563.937500  
3,1,1902.979839  
3,1,2468.772059  
3,1,2594.915441  
3,1,4064.288043  
3,1,4048.243902  
3,1,1521.348837  
3,1,1592.769737  
3,1,16929.201923  
3,1,3252.306122  
3,1,1680.107143  
3,1,4527.364362  
3,1,2354.468085  
3,1,4064.604167  
3,1,3222.762500  
3,1,3441.664634  
3,1,2719.183824  
3,1,2209.924419  
3,1,3797.297872  
3,1,7610.171875  
3,1,1974.136905  
3,1,1608.513514  
3,1,6422.347222  
3,1,3164.797222  
3,1,6737.355769  
3,1,6283.512195  
3,1,2575.863636  
3,1,2644.721429  
3,1,4868.223684

3,1,1648.000000  
3,1,2061.164634  
3,1,2129.272436  
3,1,3398.457237  
3,1,9936.000000  
3,1,8529.445122  
3,1,3060.371094  
3,1,10229.382353  
3,1,8206.648810  
3,1,1889.625000  
3,1,6379.513158  
3,1,8113.682432  
3,1,4711.149390  
3,1,4416.780488  
3,1,2464.548077  
3,1,2964.669444  
3,1,2296.250000  
3,1,6804.500000  
3,1,3176.760870  
3,1,2925.769231  
3,1,5047.937500  
3,1,2988.339286  
3,1,7364.586957  
3,1,4651.625000  
3,1,12788.463415  
3,1,1722.448718  
3,1,6034.472222  
3,1,7007.403226  
3,1,7151.324074  
3,1,10987.831250  
3,1,1725.829268  
3,1,4226.096154  
3,1,1938.727273  
3,1,3602.903846  
3,1,5961.100000  
3,1,2023.102273  
3,1,3544.271429  
3,1,6690.312500  
3,1,8188.017857  
3,1,2028.703804  
3,1,3470.400000  
3,1,1872.767442  
3,1,3027.272727  
3,1,3060.659091  
3,1,3023.829268  
3,1,5554.058824  
3,1,1718.661290  
3,1,13259.768750  
3,1,2920.540323  
3,1,1535.638158  
3,1,3418.297297  
3,1,6364.681452  
3,1,5506.945000  
3,1,3614.571429  
3,1,2377.962500  
3,1,6010.921875  
3,1,7866.523026  
3,1,4305.490000  
3,1,2341.630435  
3,1,19035.783784  
3,1,3558.394737  
3,1,2729.179688  
3,1,1513.918478  
3,1,7638.340426  
3,1,2689.109756  
3,1,3663.141026

3,1,7141.815789  
3,1,2730.048387  
3,1,6839.855263  
3,1,1776.152778  
3,1,3027.449219  
3,1,6500.402027  
3,1,3574.028226  
3,1,7399.000000  
3,1,9676.170732  
3,1,3376.325000  
3,1,3780.227273  
3,1,8891.810976  
3,1,6227.365854  
3,1,2381.604167  
3,1,2406.718750  
3,1,10067.664894  
3,1,2339.605263  
3,1,2696.308140  
3,1,1813.158088  
3,1,3987.378378  
3,1,4907.401163  
3,1,2435.544118  
3,1,1864.361111  
3,1,1988.633929  
3,1,3258.158537  
3,1,2918.397351  
3,1,1530.347826  
3,1,8256.688889  
3,1,1585.863636  
3,1,2082.708333  
3,1,2047.857143  
3,1,1651.537791  
3,1,4169.762195  
3,1,2384.578947  
3,1,3980.916667  
3,1,2276.973684  
3,1,2418.614130  
3,1,9517.464286  
3,1,1767.608696  
3,1,5223.907258  
3,1,4264.598684  
3,1,2166.599432  
3,1,3282.321429  
3,1,3002.140244  
3,1,2166.632353  
3,1,3136.946809  
3,1,3422.452381  
3,1,5449.968750  
3,1,9791.588235  
3,1,1897.821809  
3,1,2284.312500  
3,1,1811.964286  
3,1,5167.455357  
3,1,6804.695312  
3,1,1708.790698  
3,1,2999.648649  
3,1,3482.951220  
3,1,2301.336538  
3,1,4656.227273  
3,1,2894.051020  
3,1,3412.250000  
3,1,9198.697581  
3,1,9192.197115  
3,1,2347.275000  
3,1,3638.668367  
3,1,3254.158088

3,1,8500.232143  
3,1,1693.508152  
3,1,1963.540323  
3,1,1647.870968  
3,1,9634.836310  
3,1,2541.325000  
3,1,2279.684211  
3,1,4821.728723  
3,1,2126.208333  
3,1,7095.705882  
3,1,3167.819149  
3,1,5107.560811  
3,1,1880.687500  
3,1,3087.986413  
3,1,12471.671053  
3,1,2284.486842  
3,1,7453.548913  
3,1,2167.571429  
3,1,2749.200000  
3,1,4441.298387  
3,1,5164.661458  
3,1,1542.911932  
3,1,3464.992857  
3,1,2514.321429  
3,1,6138.041667  
3,1,5057.091346  
3,1,3278.419355  
3,1,11213.500000  
3,1,2206.440217  
3,1,2894.750000  
3,1,8344.344595  
3,1,2059.685976  
3,1,2693.878788  
3,1,11992.881250  
3,1,2494.875000  
3,1,7647.683673  
3,1,8053.570652  
3,1,1630.450000  
3,1,6640.531250  
3,1,1934.153846  
3,1,10742.062500  
3,1,1657.127907  
3,1,5237.733333  
3,1,2079.833333  
3,1,8533.500000  
3,1,1675.176471  
3,1,1771.964286  
3,1,5014.378378  
3,1,2447.586538  
3,1,4329.878125  
3,1,2500.653846  
3,1,4484.166667  
3,1,18650.750000  
3,1,4028.095238  
3,1,2911.807692  
3,1,4984.220238  
3,1,3454.766447  
3,1,2124.179878  
3,1,3509.325000  
3,1,8941.420455  
3,1,3243.959459  
3,1,2661.895833  
3,1,2251.080128  
3,1,5529.153061  
3,1,3187.919355  
3,1,1939.621622

3,1,2654.154412  
3,1,2966.173077  
3,1,17366.055556  
3,1,8220.182692  
3,1,2740.000000  
3,1,4659.613372  
3,1,2228.546196  
3,1,4437.902778  
3,1,12767.585185  
3,1,1954.166667  
3,1,3215.750000  
3,1,2343.375000  
3,1,4142.142857  
3,1,8607.759868  
3,1,3938.339844  
3,1,2238.125000  
3,1,3706.113095  
3,1,9117.622642  
3,1,2956.334459  
3,1,1759.857143  
3,1,17040.600000  
3,1,2761.552326  
3,1,6206.625000  
3,1,1719.500000  
3,1,12411.266667  
3,1,1554.010135  
3,1,2338.818182  
3,1,3810.769231  
3,1,2753.436170  
3,1,8678.770833  
3,1,1901.467105  
3,1,3138.870370  
3,1,1534.589286  
3,1,2049.661585  
3,1,2709.714286  
3,1,3320.858333  
3,1,4120.062500  
3,1,19689.114583  
3,1,4538.633065  
3,1,2724.304348  
3,1,8722.384868  
3,1,1973.537162  
3,1,4306.402027  
3,1,3726.943182  
3,1,1969.676471  
3,1,3809.255319  
3,1,2138.080000  
3,1,1859.943966  
3,1,4883.416667  
3,1,6958.990385  
3,1,8210.034574  
3,1,4229.079545  
3,1,2280.166667  
3,1,11092.274194  
3,1,7502.525000  
3,1,16805.000000  
3,1,1717.698276  
3,1,3757.765625  
3,1,2007.095238  
3,1,4297.495192  
3,1,13793.241935  
3,1,2303.375000  
3,1,2374.968750  
3,1,2633.065476  
3,1,1843.375000  
3,1,1712.588889

3,1,1790.635135  
3,1,5313.764706  
3,1,1619.007143  
3,1,3489.743243  
3,1,9866.000000  
3,1,4264.361702  
3,1,2686.639706  
3,1,4792.571429  
3,1,6306.260000  
3,1,1839.425532  
3,1,4174.621622  
3,1,3925.645833  
3,1,17746.448370  
3,1,1786.770833  
3,1,6883.711735  
3,1,2031.658537  
3,1,3446.153846  
3,1,5901.732558  
3,1,7302.552083  
3,1,1715.891892  
3,1,1886.512195  
3,1,1699.231250  
3,1,6807.284574  
3,1,2717.707447  
3,1,2517.312500  
3,1,2894.327381  
3,1,3150.617647  
3,1,2561.656250  
3,1,1578.000000  
3,1,8573.271552  
3,1,2432.418605  
3,1,11572.555556  
3,1,2378.500000  
3,1,4405.170732  
3,1,8625.377500  
3,1,2053.027174  
3,1,3255.723214  
3,1,2138.549419  
3,1,3829.781250  
3,1,3328.910714  
3,1,2645.890625  
3,1,12796.607558  
3,1,12579.258621  
3,1,2344.159884  
3,1,8273.047619  
3,1,1818.978125  
3,1,14426.835106  
3,1,1647.604167  
3,1,4848.833333  
3,1,4525.134615  
3,1,5000.676829  
3,1,7329.290541  
3,1,4367.097561  
3,1,4393.656250  
3,1,1907.470930  
3,1,2582.653409  
3,1,2588.315972  
3,1,10578.326087  
3,1,12232.237500  
3,1,2324.711806  
3,1,6120.743243  
3,1,4856.238971  
3,1,3568.595745  
3,1,2218.005814  
3,1,12109.277778  
3,1,11035.425000

3,1,5353.185000  
3,1,3557.350000  
3,1,1918.138158  
3,1,3599.750000  
3,1,2837.750000  
3,1,12822.993421  
3,1,1625.133621  
3,1,3612.052083  
3,1,2072.146341  
3,1,17632.900000  
3,1,2515.432432  
3,1,4483.092262  
3,1,7378.597222  
3,1,2376.583333  
3,1,3028.851562  
3,1,8540.669643  
3,1,4733.319444  
3,1,1654.650000  
3,1,2457.622222  
3,1,4264.977273  
3,1,3023.666667  
3,1,3157.331250  
3,1,3364.988636  
3,1,2174.378788  
3,1,2353.367647  
3,1,6062.725610  
3,1,13374.553191  
3,1,3708.386364  
3,1,5356.771429  
3,1,1710.555556  
3,1,10607.102941  
3,1,4142.409091  
3,1,3891.000000  
3,1,1865.093750  
3,1,8092.650000  
3,1,1607.813953  
3,1,1636.462121  
3,1,3593.868056  
3,1,4131.432692  
3,1,2350.860294  
3,1,3534.500000  
3,1,2271.829545  
3,1,6401.595588  
3,1,11488.980000  
3,1,13010.969512  
3,1,3557.522727  
3,1,3977.882353  
3,1,8637.970588  
3,1,5601.117021  
3,1,3430.157500  
3,1,1669.384615  
3,1,2977.523810  
3,1,4500.580556  
3,1,1966.444444  
3,1,6529.468750  
3,1,4217.439815  
3,1,4146.695652  
3,1,3649.115854  
3,1,3202.076923  
3,1,5526.125000  
3,1,6571.263158  
3,1,2140.000000  
3,1,2145.205882  
3,1,1595.217742  
3,1,6486.736842  
3,1,1909.755319

3,1,1856.177500  
3,1,6175.571429  
3,1,4205.839286  
3,1,5237.696429  
3,1,5561.812950  
3,1,11127.867647  
3,1,2740.639706  
3,1,1539.791667  
3,1,4329.436170  
3,1,5817.747881  
3,1,2304.287879  
3,1,3836.647059  
3,1,5441.375000  
3,1,8420.471429  
3,1,4674.087209  
3,1,4279.715278  
3,1,2898.051829  
3,1,2206.750000  
3,1,2236.809524  
3,1,3712.043478  
3,1,8129.815625  
3,1,4783.941176  
3,1,8264.674847  
3,1,15657.675000  
3,1,12833.607143  
3,1,7132.270833  
3,1,3557.839744  
3,1,2536.169643  
3,1,2142.082317  
3,1,3790.309783  
3,1,2171.146341  
3,1,2036.133621  
3,1,1529.313953  
3,1,1692.206395  
3,1,3510.767857  
3,1,2854.343750  
3,1,12461.000000  
3,1,7271.384375  
3,1,2125.527027  
3,1,1596.069444  
3,1,2678.772222  
3,1,2713.312500  
3,1,5684.420000  
3,1,2180.779070  
3,1,3810.270408  
3,1,1797.625000  
3,1,2055.306818  
3,1,2997.050595  
3,1,2537.517442  
3,1,2190.169872  
3,1,2344.305147  
3,1,5023.381250  
3,1,3522.750000  
3,1,2292.529412  
3,1,6451.500000  
3,1,1775.645833  
3,1,1741.147727  
3,1,7521.853723  
3,1,3427.714286  
3,1,19669.698529  
3,1,2995.605263  
3,1,1931.955556  
3,1,3039.552083  
3,1,2703.347973  
3,1,2349.401786  
3,1,1862.590909

3,1,10453.246528  
3,1,11746.353125  
3,1,14283.178571  
3,1,3211.775000  
3,1,2002.218750  
3,1,1685.375000  
3,1,8039.992647  
3,1,3028.323529  
3,1,3493.762500  
3,1,3476.900000  
3,1,3774.415816  
3,1,10700.750000  
3,1,5345.682692  
3,1,3836.866667  
3,1,7455.486486  
3,1,2709.958333  
3,1,1930.435811  
3,1,4052.900735  
3,1,10755.676471  
3,1,4317.647059  
3,1,2176.448529  
3,1,14095.758621  
3,1,3247.500000  
3,1,3427.477941  
3,1,8814.799528  
3,1,16780.571429  
3,1,2127.856383  
3,1,2943.568182  
3,1,1620.326923  
3,1,7012.864130  
3,1,2995.571429  
3,1,2562.936170  
3,1,6345.633929  
3,1,4777.810606  
3,1,3184.244681  
3,1,1563.947917  
3,1,6242.753125  
3,1,3567.000000  
3,1,1639.071429  
3,1,2895.014706  
3,1,5090.423077  
3,1,1894.472973  
3,1,3220.755102  
3,1,13270.485577  
3,1,1529.005435  
3,1,2082.454545  
3,1,7867.041667  
3,1,6652.051136  
3,1,2346.814815  
3,1,3833.574468  
3,1,18294.382979  
3,1,4089.904255  
3,1,1736.722561  
3,1,5113.692857  
3,1,2192.475694  
3,1,2520.632353  
3,1,3133.062500  
3,1,3220.177419  
3,1,7149.181034  
3,1,2713.937500  
3,1,8186.640000  
3,1,4820.779255  
3,1,6423.525000  
3,1,2112.384615  
3,1,2764.218750  
3,1,3723.956897

3,1,1551.560976  
3,1,6819.125000  
3,1,3543.468750  
3,1,1732.671053  
3,1,9742.860000  
3,1,4655.892442  
3,1,5123.475610  
3,1,3061.125000  
3,1,8802.165761  
3,1,2627.233553  
3,1,3505.310811  
3,1,2358.212121  
3,1,4136.276316  
3,1,2479.152174  
3,1,4733.000000  
3,1,7791.396739  
3,1,2255.806250  
3,1,2844.440625  
3,1,1569.581395  
3,1,10621.430921  
3,1,6183.463710  
3,1,1903.195652  
3,1,10590.495968  
3,1,3401.357143  
3,1,7712.800000  
3,1,9688.285714  
3,1,1698.736842  
3,1,6156.868056  
3,1,3276.097561  
3,1,4902.864796  
3,1,1700.180233  
3,1,3974.525000  
3,1,8176.945946  
3,1,2796.337500  
3,1,1738.271739  
3,1,2491.073529  
3,1,3058.881098  
3,1,10548.643939  
3,1,3445.132353  
3,1,3330.685345  
3,1,3413.037791  
3,1,1913.480114  
3,1,2810.250000  
3,1,3473.457447  
3,1,4106.650000  
3,1,6195.739583  
3,1,2447.158333  
3,1,2259.327206  
3,1,2840.807432  
3,1,1612.780488  
3,1,1562.022581  
3,1,2163.687500  
3,1,1674.159375  
3,1,3441.155488  
3,1,1916.423077  
3,1,2744.644737  
3,1,3713.596774  
3,1,1603.000000  
3,1,6418.000000  
3,1,2346.020349  
3,1,3511.770833  
3,1,4110.750000  
3,1,5209.000000  
3,1,1541.696970  
3,1,4689.510638  
3,1,4066.641026

3,1,2443.117021  
3,1,4300.650735  
3,1,3622.307927  
3,1,2352.806818  
3,1,8478.726562  
3,1,1503.213235  
3,1,3248.058333  
3,1,3084.926829  
3,1,2572.915625  
3,1,2071.531250  
3,1,5291.793478  
3,1,1702.946429  
3,1,3715.400000  
3,1,2055.645270  
3,1,2377.877907  
3,1,4023.677419  
3,1,3559.810345  
3,1,1994.712500  
3,1,3348.250000  
3,1,3606.511364  
3,1,2262.750000  
3,1,2900.269231  
3,1,3856.660714  
3,1,1501.057927  
3,1,3329.511905  
3,1,6170.130435  
3,1,6196.453125  
3,1,2450.666667  
3,1,1853.089286  
3,1,4677.244048  
3,1,2487.957447  
3,1,3211.915000  
3,1,3571.940625  
3,1,3543.304878  
3,1,10694.743750  
3,1,3641.720930  
3,1,2367.666667  
3,1,2065.595238  
3,1,3874.454082  
3,1,4741.808824  
3,1,3773.375000  
3,1,3471.087766  
3,1,1544.079787  
3,1,2082.153846  
3,1,6753.771739  
3,1,5988.255319  
3,1,2634.384615  
3,1,3698.341146  
3,1,2431.921429  
3,1,18099.730769  
3,1,16447.004032  
3,1,2112.125000  
3,1,5141.955645  
3,1,2764.892241  
3,1,2493.848958  
3,1,17761.625000  
3,1,3729.260870  
3,1,7416.000000  
3,1,1500.597656  
3,1,4708.800000  
3,1,3674.046875  
3,1,1738.750000  
3,1,3638.866935  
3,1,1793.161765  
3,1,7843.716463  
3,1,7507.200000

3,1,1630.476562  
3,1,3492.698276  
3,1,1615.335106  
3,1,19545.465909  
3,1,3161.157407  
3,1,2082.980769  
3,1,1565.345588  
3,1,2014.601351  
3,1,1979.602273  
3,1,1840.416667  
3,1,3918.675532  
3,1,2917.575000  
3,1,4168.468085  
3,1,7754.273585  
3,1,7206.529891  
3,1,1613.000000  
3,1,1744.234375  
3,1,8183.781250  
3,1,6814.296875  
3,1,2184.083333  
3,1,1883.519737  
3,1,1636.394531  
3,1,10472.203125  
3,1,2966.707143  
3,1,1617.462500  
3,1,4564.976974  
3,1,1906.709239  
3,1,3172.425781  
3,1,9992.256098  
3,1,1644.764535  
3,1,2526.647727  
3,1,10959.402439  
3,1,1519.602941  
3,1,4430.963942  
3,1,11813.668605  
3,1,1773.428571  
3,1,6566.743421  
3,1,3264.875000  
3,1,6779.921196  
3,1,3012.025000  
3,1,6484.850543  
3,1,3219.916667  
3,1,1801.500000  
3,1,1507.002976  
3,1,3719.355978  
3,1,5093.116848  
3,1,4806.229167  
3,1,3830.160000  
3,1,5528.050420  
3,1,2770.940000  
3,1,2123.200000  
3,1,2748.318182  
3,1,1921.592857  
3,1,2357.636364  
3,1,13501.973404  
3,1,2641.610465  
3,1,8360.588235  
3,1,2488.117647  
3,1,5850.656977  
3,1,1919.153226  
3,1,1885.104167  
3,1,2080.942073  
3,1,1901.763158  
3,1,1559.839286  
3,1,4635.518750  
3,1,6135.500000

3,1,6115.203125  
3,1,8094.081395  
3,1,4177.309524  
3,1,2410.444444  
3,1,1914.815217  
3,1,2828.097973  
3,1,3320.006757  
3,1,1554.086111  
3,1,2345.673295  
3,1,2029.675000  
3,1,3220.968750  
3,1,8147.769737  
3,1,1699.538462  
3,1,13054.087209  
3,1,2877.590909  
3,1,3206.171429  
3,1,1540.343750  
3,1,1684.500000  
3,1,3496.916667  
3,1,1745.454545  
3,1,1734.426471  
3,1,6077.616477  
3,1,1596.744186  
3,1,5040.014535  
3,1,1594.565217  
3,1,7054.304054  
3,1,11095.394737  
3,1,8494.057692  
3,1,3557.533537  
3,1,1837.440341  
3,1,1805.282051  
3,1,1567.668750  
3,1,3159.205357  
3,1,3301.395833  
3,1,12038.697368  
3,1,6592.803571  
3,1,10668.416667  
3,1,5089.308594  
3,1,4216.294118  
3,1,18471.237500  
3,1,8088.547794  
3,1,2198.185606  
3,1,3993.195122  
3,1,2126.225000  
3,1,3249.244186  
3,1,3283.237805  
3,1,3896.558140  
3,1,2809.389286  
3,1,12409.121795  
3,1,10183.057143  
3,1,11451.375000  
3,1,4738.009868  
3,1,1821.166667  
3,1,1687.600000  
3,1,4557.965116  
3,1,3707.068548  
3,1,8087.681818  
3,1,3335.080000  
3,1,1550.280000  
3,1,1950.598684  
3,1,3350.762195  
3,1,1739.903226  
3,1,4365.202128  
3,1,2707.885417  
3,1,4209.064189  
3,1,2283.431373

3,1,8147.783784  
3,1,13123.863971  
3,1,4777.826087  
3,1,1936.854167  
3,1,3432.287879  
3,1,1604.231707  
3,1,1752.250000  
3,1,2429.837500  
3,1,3359.674242  
3,1,1822.232639  
3,1,1930.271429  
3,1,2006.669643  
3,1,5966.725694  
3,1,14457.325000  
3,1,9878.711538  
3,1,2261.681818  
3,1,2879.296512  
3,1,15159.541667  
3,1,1763.000000  
3,1,2891.975962  
3,1,3505.375000  
3,1,1857.606250  
3,1,1778.912791  
3,1,3591.620690  
3,1,5939.120370  
3,1,1591.610795  
3,1,1636.077381  
3,1,2105.255682  
3,1,7110.194149  
3,1,5063.915625  
3,1,2353.117647  
3,1,3104.763158  
3,1,1852.579861  
3,1,2896.663462  
3,1,1516.290541  
3,1,2176.091463  
3,1,4698.911765  
3,1,1690.003378  
3,1,6050.566964  
3,1,2299.009146  
3,1,2446.719697  
3,1,2648.253788  
3,1,3110.825000  
3,1,1599.539286  
3,1,3671.125000  
3,1,15245.233871  
3,1,2357.260870  
3,1,2588.120192  
3,1,6212.217949  
3,1,3622.891892  
3,1,3969.202206  
3,1,2178.069079  
3,1,3889.845930  
3,1,1948.371711  
3,1,1537.789474  
3,1,3410.413043  
3,1,1560.390244  
3,1,3281.290698  
3,1,8881.847973  
3,1,1752.146739  
3,1,6849.181122  
3,1,1850.343750  
3,1,5432.970588  
3,1,16664.346939  
3,1,2510.024390  
3,1,4576.321429

3,1,3720.538462  
3,1,7424.307692  
3,1,6433.434211  
3,1,1798.005435  
3,1,1771.021552  
3,1,4126.486486  
3,1,1564.292683  
3,1,1577.137195  
3,1,1871.146341  
3,1,1523.518293  
3,1,4030.713235  
3,1,5637.427083  
3,1,3677.427083  
3,1,2000.375000  
3,1,6182.083333  
3,1,2186.191176  
3,1,1742.169872  
3,1,2816.849432  
3,1,2150.398936  
3,1,3884.679487  
3,1,12746.895161  
3,1,2635.692308  
3,1,16812.253676  
3,1,6893.625000  
3,1,3077.941176  
3,1,6778.622093  
3,1,6022.354167  
3,1,6893.514535  
3,1,2852.859375  
3,1,4648.314024  
3,1,7408.170000  
3,1,4313.596154  
3,1,1994.000000  
3,1,3723.545455  
3,1,2007.639706  
3,1,3360.339806  
3,1,4704.375000  
3,1,4091.354167  
3,1,2670.635135  
3,1,10385.259615  
3,1,12702.961957  
3,1,2094.680556  
3,1,1989.736842  
3,1,8732.638298  
3,1,12125.637755  
3,1,17092.277439  
3,1,1850.736842  
3,1,8849.147059  
3,1,4169.669355  
3,1,15317.783088  
3,1,1663.656250  
3,1,2237.718750  
3,1,9704.923611  
3,1,7023.250000  
3,1,2595.022059  
3,1,1649.282609  
3,1,3934.650000  
3,1,2202.051471  
3,1,3507.922794  
3,1,15919.597222  
3,1,2341.884615  
3,1,2391.893293  
3,1,7233.750000  
3,1,3057.363636  
3,1,3331.371951  
3,1,2687.195122

3,1,7759.750000  
3,1,5684.480769  
3,1,1801.080645  
3,1,4394.843023  
3,1,1577.739130  
3,1,6111.355978  
3,1,3737.089286  
3,1,3282.973684  
3,1,2620.272059  
3,1,10776.187500  
3,1,11387.997340  
3,1,2226.230769  
3,1,3729.149390  
3,1,12837.846154  
3,1,4052.106250  
3,1,7084.442857  
3,1,5702.052419  
3,1,1561.190476  
3,1,13930.571429  
3,1,1817.122340  
3,1,2026.636905  
3,1,5945.195312  
3,1,4044.669643  
3,1,3169.503676  
3,1,3998.457031  
3,1,1579.888889  
3,1,13797.580128  
3,1,5591.508929  
3,1,9239.223684  
3,1,1709.161765  
3,1,2294.295732  
3,1,1762.941176  
3,1,15807.625000  
3,1,2695.802778  
3,1,5706.666667  
3,1,2736.660714  
3,1,6913.346154  
3,1,3670.716216  
3,1,1664.517241  
3,1,5425.928571  
3,1,13822.150000  
3,1,1750.666667  
3,1,3744.810606  
3,1,5873.406250  
3,1,2019.544118  
3,1,1993.466667  
3,1,2997.918750  
3,1,1968.937500  
3,1,9763.550781  
3,1,2398.314286  
3,1,3507.846154  
3,1,3080.747396  
3,1,8311.703125  
3,1,6517.750000  
3,1,1828.428571  
3,1,14455.050000  
3,1,2355.602273  
3,1,2181.113208  
3,1,4498.423077  
3,1,1956.794355  
3,1,3633.231618  
3,1,3086.482955  
3,1,3494.662500  
3,1,5103.923913  
3,1,7646.895349  
3,1,1857.802632

3,1,3856.761905  
3,1,3115.857143  
3,1,1620.986395  
3,1,16495.576923  
3,1,4855.943182  
3,1,4496.343023  
3,1,1598.992424  
3,1,6616.765152  
3,1,9590.110465  
3,1,1821.392857  
3,1,1745.640152  
3,1,1693.778409  
3,1,2608.608974  
3,1,1696.142857  
3,1,6235.914634  
3,1,4610.687500  
3,1,3314.681373  
3,1,2501.375000  
3,1,1753.508621  
3,1,4721.250000  
3,1,1604.736842  
3,1,5273.750000  
3,1,2389.011719  
3,1,1507.133523  
3,1,2854.233871  
3,1,3816.111111  
3,1,3055.903409  
3,1,4335.551471  
3,1,3885.297297  
3,1,3137.250000  
3,1,2542.066667  
3,1,3201.826087  
3,1,1910.918919  
3,1,3017.387195  
3,1,1613.281250  
3,1,1578.244444  
3,1,1576.682692  
3,1,5114.333333  
3,1,1768.008721  
3,1,11458.483871  
3,1,7907.735294  
3,1,1528.250000  
3,1,14213.934783  
3,1,1544.384868  
3,1,3821.759615  
3,1,5785.431818  
3,1,7425.250000  
3,1,2537.462121  
3,1,2139.750000  
3,1,7894.700000  
3,1,3034.993750  
3,1,2827.464286  
3,1,2991.500000  
3,1,2988.625000  
3,1,3198.043478  
3,1,1529.250000  
3,1,1717.101974  
3,1,6475.564103  
3,1,3557.084302  
3,1,6090.969697  
3,1,1562.672872  
3,1,11227.414894  
3,1,10232.487805  
3,1,3981.485000  
3,1,17922.962500  
3,1,4127.965116

3,1,2646.203125  
3,1,1915.906250  
3,1,1842.762821  
3,1,3989.813953  
3,1,14923.046875  
3,1,1639.407051  
3,1,1561.878788  
3,1,9365.923077  
3,1,3838.875000  
3,1,5065.991935  
3,1,1852.755814  
3,1,2037.566176  
3,1,2935.314394  
3,1,14541.475490  
3,1,3470.725806  
3,1,2124.918605  
3,1,2366.263889  
3,1,4965.708333  
3,1,1727.897959  
3,1,1968.168919  
3,1,3385.798295  
3,1,1893.234375  
3,1,11789.273256  
3,1,5290.167763  
3,1,1823.904762  
3,1,18828.666667  
3,1,2409.567308  
3,1,2459.893293  
3,1,6252.272727  
3,1,3183.067708  
3,1,2126.318452  
3,1,1761.508152  
3,1,9608.425781  
3,1,2582.329545  
3,1,13435.872396  
3,1,2482.750000  
3,1,4692.757812  
3,1,2955.535256  
3,1,6802.650735  
3,1,8655.514286  
3,1,3582.013158  
3,1,1751.672222  
3,1,2166.878378  
3,1,13725.909091  
3,1,3405.608108  
3,1,16866.412500  
3,1,5035.250000  
3,1,1715.831633  
3,1,1702.328488  
3,1,2026.091463  
3,1,2804.407609  
3,1,4035.887500  
3,1,6356.215278  
3,1,2250.561111  
3,1,2326.939024  
3,1,7042.333333  
3,1,4244.678571  
3,1,17329.459459  
3,1,10748.300000  
3,1,2073.486486  
3,1,3366.950000  
3,1,1809.464286  
3,1,16752.765625  
3,1,6626.414773  
3,1,1944.069767  
3,1,5386.053571

3,1,3711.724432  
3,1,1665.312500  
3,1,1772.125000  
3,1,4745.725000  
3,1,2023.134615  
3,1,7134.820946  
3,1,1795.755435  
3,1,2391.100610  
3,1,3220.531250  
3,1,1597.743243  
3,1,3056.811047  
3,1,13354.118750  
3,1,3978.666667  
3,1,9866.500000  
3,1,3906.942857  
3,1,3145.233333  
3,1,2653.884615  
3,1,2078.750000  
3,1,13506.689655  
3,1,2142.157895  
3,1,5179.824324  
3,1,15047.750000  
3,1,2110.560976  
3,1,2937.966216  
3,1,2338.411765  
3,1,7789.050000  
3,1,2408.328125  
3,1,1617.500000  
3,1,3049.798913  
3,1,4692.794271  
3,1,2761.253571  
3,1,5946.296875  
3,1,3321.946809  
3,1,3454.163043  
3,1,5094.727941  
3,1,7103.513158  
3,1,1770.213235  
3,1,3865.511364  
3,1,5011.392361  
4,2,1555.350694  
4,2,2210.730263  
4,2,9856.416667  
4,2,2084.571429  
4,2,2186.632653  
4,2,2620.101064  
4,2,1864.718750  
4,2,2033.287037  
4,2,1541.821809  
4,2,2506.855114  
4,2,13282.711538  
4,2,1566.838542  
4,2,1669.487245  
4,2,5493.913043  
4,2,1690.315789  
4,2,9399.738839  
4,2,2375.285714  
4,2,3387.413462  
4,2,2337.553922  
4,2,1738.695431  
4,2,4465.055851  
4,2,1805.833333  
4,2,1624.497396  
4,2,1826.000000  
4,2,2252.815625  
4,2,3060.274510  
4,2,1517.601064

4,2,1516.016304  
4,2,2377.358491  
4,2,2945.034091  
4,2,1602.846154  
4,2,2027.500000  
4,2,2862.941176  
4,2,9185.800000  
4,2,1676.262500  
4,2,4208.092500  
4,2,2021.819712  
4,2,1771.955128  
4,2,2734.577778  
4,2,2298.545455  
4,2,1874.040000  
4,2,1613.952381  
4,2,1850.358639  
4,2,2238.177778  
4,2,3471.400000  
4,2,1502.104592  
4,2,1945.869792  
4,2,1992.967391  
4,2,2639.366667  
4,2,2696.254630  
4,2,2006.366667  
4,2,2737.700000  
4,2,3508.259615  
4,2,2111.750000  
4,2,5216.459239  
4,2,1505.054054  
4,2,10777.987500  
4,2,4079.957447  
4,2,1695.836538  
4,2,13461.765152  
4,2,1769.061224  
4,2,2064.230769  
4,2,1788.852564  
4,2,2781.198864  
4,2,2985.066327  
4,2,2982.243421  
4,2,1916.946429  
4,2,1987.983333  
4,2,1984.628472  
4,2,17626.589286  
4,2,2113.676923  
4,2,1975.264151  
4,2,3051.073529  
4,2,1918.068627  
4,2,1874.882653  
4,2,2530.041667  
4,2,2650.000000  
4,2,1542.326923  
4,2,9149.430556  
4,2,3163.941176  
4,2,7513.402439  
4,2,1849.335000  
4,2,4413.823171  
4,2,3355.750000  
4,2,1562.141667  
4,2,1917.273936  
4,2,3177.875000  
4,2,2450.362245  
4,2,2176.000000  
4,2,6119.250000  
4,2,2399.361111  
4,2,2269.814024  
4,2,2002.397059

4,2,2601.808824  
4,2,1601.979167  
4,2,1647.418478  
4,2,3939.083333  
4,2,1568.137500  
4,2,1774.683140  
4,2,1699.370000  
4,2,2619.372500  
4,2,1570.476190  
4,2,1818.343750  
4,2,5522.212766  
4,2,2228.326705  
4,2,2160.439815  
4,2,4699.765306  
4,2,2035.000000  
4,2,2051.490385  
4,2,2138.690000  
4,2,2377.840909  
4,2,2949.370370  
4,2,2837.316176  
4,2,1884.850000  
4,2,5650.634615  
4,2,2041.437500  
4,2,1572.311321  
4,2,2017.750000  
4,2,1734.418919  
4,2,2313.050000  
4,2,2050.916667  
4,2,1773.789474  
4,2,2579.250000  
4,2,2039.425000  
4,2,2018.678977  
4,2,3998.548077  
4,2,2191.264423  
4,2,2541.599490  
4,2,1567.080000  
4,2,1692.712500  
4,2,2777.821990  
4,2,4043.586592  
4,2,1775.000000  
4,2,3074.890306  
4,2,1674.431548  
4,2,2786.752778  
4,2,2211.050000  
4,2,15442.270000  
4,2,4228.231618  
4,2,1581.587500  
4,2,1962.912500  
4,2,2236.531250  
4,2,1824.229167  
4,2,1974.591837  
4,2,2828.412371  
4,2,5626.550000  
4,2,6550.437500  
4,2,2431.375000  
4,2,2108.090909  
4,2,2298.062500  
4,2,1573.183333  
4,2,1965.276961  
4,2,2411.134434  
4,2,1675.579545  
4,2,1647.357143  
4,2,6779.779167  
4,2,2649.393750  
4,2,5366.101852  
4,2,3319.816489

4,2,1862.264706  
4,2,1935.053571  
4,2,8075.225000  
4,2,1888.527273  
4,2,1935.140625  
4,2,8032.814655  
4,2,2225.920000  
4,2,3517.178571  
4,2,1812.243902  
4,2,1988.760870  
4,2,4271.866071  
4,2,1631.038043  
4,2,2163.598039  
4,2,1554.923780  
4,2,2471.331395  
4,2,1523.166667  
4,2,18540.421053  
4,2,2662.400000  
4,2,1877.350000  
4,2,1575.164634  
4,2,2179.000000  
4,2,5318.235294  
4,2,3072.888889  
4,2,2592.242021  
4,2,2693.732558  
4,2,3662.728261  
4,2,4915.638889  
4,2,2750.750000  
4,2,2051.227941  
4,2,2907.093750  
4,2,3071.364362  
4,2,3788.427632  
4,2,2211.641026  
4,2,1509.252500  
4,2,1704.689189  
4,2,2734.695122  
4,2,1642.781250  
4,2,1782.850000  
4,2,3152.065625  
4,2,1925.278302  
4,2,1861.846698  
4,2,1529.073529  
4,2,2312.041667  
4,2,2836.841346  
4,2,1605.573529  
4,2,2605.691176  
4,2,4873.100000  
4,2,1573.800676  
4,2,15184.117347  
4,2,3311.000000  
4,2,10564.666667  
4,2,2211.847222  
4,2,1744.125000  
4,2,4242.559701  
4,2,1513.775000  
4,2,1990.333333  
4,2,1922.771341  
4,2,2345.075000  
4,2,3069.396277  
4,2,2085.375000  
4,2,8651.828488  
4,2,2443.828947  
4,2,5695.840517  
4,2,1507.982051  
4,2,1513.429348  
4,2,2248.148148

4,2,6964.387755  
4,2,2279.025000  
4,2,2291.085938  
4,2,4548.159483  
4,2,2376.428571  
4,2,2222.771429  
4,2,1900.449468  
4,2,2053.832386  
4,2,4514.336898  
4,2,6205.700000  
4,2,1975.839286  
4,2,1782.900662  
4,2,2628.080214  
4,2,2593.036458  
4,2,2923.974359  
4,2,1942.769608  
4,2,4717.515625  
4,2,2553.247340  
4,2,1789.936170  
4,2,3788.116279  
4,2,1533.504032  
4,2,5253.207317  
4,2,3137.579545  
4,2,1693.838028  
4,2,2784.875000  
4,2,1821.727941  
4,2,1607.690476  
4,2,6278.436047  
4,2,6224.064732  
4,2,1521.375000  
4,2,1728.414474  
4,2,1895.000000  
4,2,2775.750000  
4,2,2958.844595  
4,2,3178.829268  
4,2,1961.347656  
4,2,2003.845000  
4,2,1938.546512  
4,2,2607.069767  
4,2,1757.745192  
4,2,2731.375000  
4,2,2313.018868  
4,2,1966.791667  
4,2,2461.062500  
4,2,5430.042857  
4,2,3511.588415  
4,2,3549.406915  
4,2,1627.364130  
4,2,2534.902439  
4,2,3123.340278  
4,2,2724.042553  
4,2,3800.437500  
4,2,2439.578947  
4,2,1791.875000  
4,2,2024.645408  
4,2,1499.703125  
4,2,1880.510000  
4,2,1702.054545  
4,2,16818.609375  
4,2,1755.750000  
4,2,5490.630435  
4,2,2570.687500  
4,2,1618.756098  
4,2,1678.170732  
4,2,2353.500000  
4,2,1908.195312

4,2,2026.552632  
4,2,5416.798611  
4,2,1526.605263  
4,2,1634.870370  
4,2,1891.234973  
4,2,3200.936170  
4,2,2151.015625  
4,2,2680.507075  
4,2,1807.056250  
4,2,3455.150943  
4,2,2035.081731  
4,2,4881.048780  
4,2,2427.982143  
4,2,1556.174242  
4,2,2457.450980  
4,2,1527.000000  
4,2,2026.966463  
4,2,1788.365000  
4,2,7281.322581  
4,2,1757.111111  
4,2,2597.510417  
4,2,12876.842105  
4,2,3225.546512  
4,2,2009.889706  
4,2,2422.285000  
4,2,2329.032787  
4,2,3643.052326  
4,2,2633.511628  
4,2,1578.000000  
4,2,4369.048295  
4,2,1866.003676  
4,2,1640.734848  
4,2,10326.757576  
4,2,1957.423077  
4,2,2523.981132  
4,2,1556.070652  
4,2,4781.675000  
4,2,2684.182692  
4,2,3050.806122  
4,2,1900.453846  
4,2,2121.377976  
4,2,1947.535000  
4,2,2221.166667  
4,2,2849.047619  
4,2,3039.899123  
4,2,2333.276596  
4,2,2156.833333  
4,2,2010.432692  
4,2,1602.141667  
4,2,1626.875000  
4,2,1816.445652  
4,2,3079.475000  
4,2,1636.684211  
4,2,1786.471154  
4,2,9066.848684  
4,2,2385.756579  
4,2,3652.600000  
4,2,1613.348214  
4,2,1609.898256  
4,2,2137.776596  
4,2,1732.222561  
4,2,1671.442708  
4,2,1602.741848  
4,2,16687.796053  
4,2,1971.872396  
4,2,3575.085106

4,2,3700.095588  
4,2,8011.794118  
4,2,3727.719388  
4,2,2269.602273  
4,2,2044.267045  
4,2,2691.862500  
4,2,2175.908537  
4,2,1566.187500  
4,2,2913.428191  
4,2,1798.500000  
4,2,1685.750000  
4,2,3367.804878  
4,2,2037.193359  
4,2,2687.494792  
4,2,2132.831897  
4,2,6522.614865  
4,2,1665.807065  
4,2,1669.634868  
4,2,2950.548780  
4,2,8633.601695  
4,2,1947.276316  
4,2,2409.171053  
4,2,2315.492021  
4,2,1819.666667  
4,2,1811.861702  
4,2,5252.433673  
4,2,2183.053922  
4,2,1984.319149  
4,2,2049.736702  
4,2,3386.622159  
4,2,1516.923077  
4,2,2040.312500  
4,2,4765.769231  
4,2,1621.975000  
4,2,4089.932065  
4,2,1635.974432  
4,2,3846.182432  
4,2,2584.375000  
4,2,1614.832386  
4,2,1823.517857  
4,2,4559.738636  
4,2,1587.866477  
4,2,1683.122283  
4,2,2925.132353  
4,2,1900.576531  
4,2,6162.107143  
4,2,1608.233553  
4,2,2558.789474  
4,2,4128.063830  
4,2,13228.215909  
4,2,2669.319444  
4,2,1660.356383  
4,2,3567.704545  
4,2,3472.918605  
4,2,3839.747768  
4,2,1774.122642  
4,2,3409.046512  
4,2,1836.600000  
4,2,14318.527778  
4,2,1727.427083  
4,2,6157.319797  
4,2,1824.150000  
4,2,3510.090909  
4,2,1780.750000  
4,2,1842.625000  
4,2,1704.359756

4,2,1499.608173  
4,2,1795.448370  
4,2,1688.991071  
4,2,1731.340426  
4,2,2386.595745  
4,2,2980.125749  
4,2,5732.506250  
4,2,2715.515306  
4,2,2378.904545  
4,2,1625.067901  
4,2,2247.941176  
4,2,6513.410714  
4,2,2248.918919  
4,2,2201.168750  
4,2,1731.814904  
4,2,5437.476974  
4,2,1617.440789  
4,2,14542.250000  
4,2,1797.014706  
4,2,1893.186321  
4,2,2559.481481  
4,2,1739.346354  
4,2,9297.906250  
4,2,1630.631068  
4,2,2059.915761  
4,2,1701.754386  
4,2,4627.141026  
4,2,4084.462500  
4,2,5213.250000  
4,2,1637.947368  
4,2,1966.250000  
4,2,1504.770833  
4,2,3006.840426  
4,2,2488.284091  
4,2,2238.451087  
4,2,1859.239130  
4,2,1501.721311  
4,2,3191.368421  
4,2,3756.333333  
4,2,2516.214286  
4,2,1804.634146  
4,2,1518.621094  
4,2,2293.009804  
4,2,2466.104167  
4,2,3829.190000  
4,2,1506.834906  
4,2,2215.275000  
4,2,1820.105263  
4,2,1626.648437  
4,2,2521.212766  
4,2,2527.128378  
4,2,2290.882576  
4,2,2345.234043  
4,2,5719.461538  
4,2,3886.645455  
4,2,5208.981132  
4,2,1557.361702  
4,2,2397.520000  
4,2,2945.301887  
4,2,12333.058824  
4,2,1786.934211  
4,2,7655.274390  
4,2,3117.540541  
4,2,2253.939189  
4,2,2542.058696  
4,2,3023.840000

4,2,1622.211538  
4,2,1911.270833  
4,2,1934.218750  
4,2,1835.127551  
4,2,6090.322115  
4,2,1695.083333  
4,2,1709.039062  
4,2,1819.228125  
4,2,2543.795000  
4,2,3218.108553  
4,2,2975.250000  
4,2,6619.097458  
4,2,1853.528646  
4,2,3133.032895  
4,2,2997.169118  
4,2,2236.312500  
4,2,2214.454545  
4,2,2490.295000  
4,2,1516.215116  
4,2,3243.020408  
4,2,3419.404762  
4,2,2290.583333  
4,2,2869.391304  
4,2,3183.447368  
4,2,2048.569079  
4,2,2206.205882  
4,2,1572.992857  
4,2,2297.110795  
4,2,3021.032258  
4,2,1551.297872  
4,2,2301.282609  
4,2,2763.070513  
4,2,3485.704861  
4,2,1853.247549  
4,2,1819.296053  
4,2,2383.428571  
4,2,1893.333333  
4,2,2470.828125  
4,2,1912.829787  
4,2,7104.292683  
4,2,2841.062500  
4,2,4521.307692  
4,2,1690.285714  
4,2,2578.381250  
4,2,5872.788462  
4,2,3626.777778  
4,2,2316.562500  
4,2,1539.039773  
4,2,2606.723684  
4,2,1512.318182  
4,2,2126.785000  
4,2,1547.592262  
4,2,2285.789474  
4,2,7872.404762  
4,2,1783.285714  
4,2,3963.048611  
4,2,1649.013514  
4,2,2305.860465  
4,2,2280.086957  
4,2,3005.382653  
4,2,2339.351064  
4,2,7155.793860  
4,2,4475.875000  
4,2,1819.966667  
4,2,1869.397727  
4,2,2124.306122

4,2,2393.010417  
4,2,3018.037037  
4,2,12409.416667  
4,2,3369.540816  
4,2,1848.724490  
4,2,2169.073171  
4,2,16406.275701  
4,2,2224.023585  
4,2,2066.336957  
4,2,10923.302326  
4,2,2150.895349  
4,2,1562.250000  
4,2,1656.595930  
4,2,1927.656250  
4,2,2103.445652  
4,2,3390.236364  
4,2,2132.881757  
4,2,1894.958333  
4,2,2812.383523  
4,2,1525.625000  
4,2,3157.821429  
4,2,1620.654762  
4,2,2539.755319  
4,2,1833.166667  
4,2,2017.195122  
4,2,1735.375000  
4,2,1624.454545  
4,2,1505.312500  
4,2,1691.223214  
4,2,3021.011111  
4,2,2536.450000  
4,2,1631.210938  
4,2,8393.598039  
4,2,2475.482500  
4,2,3466.451220  
4,2,2124.000000  
4,2,1728.765625  
4,2,2407.409091  
4,2,2809.680851  
4,2,1597.346875  
4,2,4360.935976  
4,2,1619.703488  
4,2,2707.914062  
4,2,4989.571429  
4,2,1598.400000  
4,2,1535.948718  
4,2,5211.795213  
4,2,1870.000000  
4,2,2614.422872  
4,2,2037.295833  
4,2,1593.279070  
4,2,2062.157895  
4,2,1501.138158  
4,2,4326.947917  
4,2,1597.276042  
4,2,2154.201923  
4,2,2261.080000  
4,2,2138.294118  
4,2,4153.666667  
4,2,1586.125000  
4,2,2146.774510  
4,2,1829.174342  
4,2,1983.281250  
4,2,2955.604592  
4,2,1573.285714  
4,2,3446.705357

4,2,4073.725610  
4,2,4393.768293  
4,2,1851.898437  
4,2,2354.530488  
4,2,1690.637755  
4,2,1517.463816  
4,2,3057.803571  
4,2,3920.213592  
4,2,3017.250000  
4,2,1682.625000  
4,2,1670.980392  
4,2,4611.785326  
4,2,2167.664474  
4,2,2295.216981  
4,2,2566.137500  
4,2,1814.792553  
4,2,1933.485119  
4,2,2127.673611  
4,2,1678.085106  
4,2,2287.341463  
4,2,2926.454545  
4,2,1961.047727  
4,2,2373.089286  
4,2,1552.806122  
4,2,2287.098485  
4,2,2776.187500  
4,2,5738.944444  
4,2,1636.834135  
4,2,3410.343750  
4,2,5138.330000  
4,2,1608.037500  
4,2,6813.449074  
4,2,1767.002404  
4,2,2794.166667  
4,2,2993.610169  
4,2,2694.161290  
4,2,1634.509615  
4,2,2118.665541  
4,2,2635.242424  
4,2,2176.541436  
4,2,4534.462500  
4,2,1882.773256  
4,2,9368.215686  
4,2,6127.991279  
4,2,5374.195312  
4,2,5347.227273  
4,2,7505.713235  
4,2,1998.002717  
4,2,2008.734694  
4,2,1987.461538  
4,2,3845.377604  
4,2,1909.020000  
4,2,2556.812500  
4,2,1754.056818  
4,2,3550.404762  
4,2,1522.921569  
4,2,1590.712838  
4,2,2121.539216  
4,2,1872.060811  
4,2,4765.989865  
4,2,2511.818182  
4,2,1774.216667  
4,2,1616.398148  
4,2,1947.027439  
4,2,2379.507500  
4,2,5198.155172

4,2,2225.012755  
4,2,2178.518519  
4,2,6882.425676  
4,2,2941.792453  
4,2,3155.216463  
4,2,2654.375000  
4,2,4029.744318  
4,2,2579.380952  
4,2,1592.500000  
4,2,1834.481707  
4,2,2277.932500  
4,2,4123.405488  
4,2,2313.034314  
4,2,1989.880435  
4,2,2076.535000  
4,2,1623.324519  
4,2,1706.116071  
4,2,1802.515000  
4,2,7557.050532  
4,2,2458.714286  
4,2,1716.431250  
4,2,1528.585366  
4,2,1873.223214  
4,2,1694.317073  
4,2,1825.723404  
4,2,2231.625000  
4,2,1663.218750  
4,2,8267.971591  
4,2,1691.344828  
4,2,1732.600000  
4,2,2671.294118  
4,2,2409.750000  
4,2,7166.599265  
4,2,3433.635417  
4,2,2669.907143  
4,2,2409.225108  
4,2,1904.358974  
4,2,3155.000000  
4,2,1610.747748  
4,2,2660.405556  
4,2,7365.000000  
4,2,2388.142045  
4,2,1720.250000  
4,2,2333.812500  
4,2,1596.075658  
4,2,2123.722826  
4,2,1861.188776  
4,2,1695.986842  
4,2,1668.887179  
4,2,1629.612565  
4,2,1919.833333  
4,2,2412.372340  
4,2,2016.330645  
4,2,2946.521552  
4,2,4203.250000  
4,2,3415.747093  
4,2,5327.715517  
4,2,2001.441667  
4,2,1505.215517  
4,2,19481.058824  
4,2,2166.414894  
4,2,2969.030172  
4,2,1738.355000  
4,2,4333.052326  
4,2,2072.844828  
4,2,1909.511029

4,2,4743.438889  
4,2,2037.000000  
4,2,1988.769231  
4,2,2897.906250  
4,2,2588.500000  
4,2,2838.527027  
4,2,1755.681818  
4,2,1564.971591  
4,2,1764.680851  
4,2,1552.781250  
4,2,1899.406915  
4,2,1741.150568  
4,2,1824.990385  
4,2,2264.730000  
4,2,2504.788194  
4,2,2660.764205  
4,2,1781.145833  
4,2,1598.706522  
4,2,1833.781818  
4,2,1941.530000  
4,2,2973.721429  
4,2,3372.182692  
4,2,2007.904891  
4,2,3764.271605  
4,2,2012.361702  
4,2,7044.992647  
4,2,1612.372340  
4,2,1775.039474  
4,2,5059.078125  
4,2,2473.103774  
4,2,2274.783784  
4,2,2646.943452  
4,2,1503.077381  
4,2,4733.285714  
4,2,3040.512821  
4,2,2744.957500  
4,2,3425.823529  
4,2,1841.237500  
4,2,1800.911765  
4,2,1990.115854  
4,2,5119.687500  
4,2,1700.747449  
4,2,7654.655000  
4,2,3042.607143  
4,2,2075.437500  
4,2,1788.687500  
4,2,2910.363636  
4,2,2089.250000  
4,2,1758.835366  
4,2,1700.526316  
4,2,2085.949324  
4,2,2909.428191  
4,2,1622.220930  
4,2,4381.338542  
4,2,2639.546875  
4,2,1800.350877  
4,2,1548.613095  
4,2,2440.517391  
4,2,2771.128947  
4,2,4177.544737  
4,2,1732.459135  
4,2,2012.183824  
4,2,1551.594828  
4,2,1958.571429  
4,2,2621.036458  
4,2,2569.625000

4,2,7232.285714  
4,2,3758.276786  
4,2,5749.897727  
4,2,1925.298780  
4,2,1523.730000  
4,2,3563.677326  
4,2,1562.442857  
4,2,2024.441406  
4,2,2664.985000  
4,2,1718.304878  
4,2,2895.782051  
4,2,4429.820833  
4,2,1642.078947  
4,2,1895.593137  
4,2,1961.630435  
4,2,5134.727273  
4,2,2163.778571  
4,2,2259.722222  
4,2,4433.041667  
4,2,1891.027778  
4,2,5837.168981  
4,2,4098.238342  
4,2,1524.477564  
4,2,2020.338415  
4,2,1930.164474  
4,2,4481.781915  
4,2,2463.617925  
4,2,2837.111111  
4,2,1769.522624  
4,2,1921.159884  
4,2,4279.784615  
4,2,1821.843750  
4,2,1637.438889  
4,2,1536.500000  
4,2,1583.928571  
4,2,2834.825000  
4,2,6810.828571  
4,2,2306.395455  
4,2,2972.962766  
4,2,1499.668605  
4,2,2211.285714  
4,2,2177.222222  
4,2,2019.233108  
4,2,2259.597656  
4,2,2154.570048  
4,2,2045.254717  
4,2,2373.731383  
4,2,5677.659314  
4,2,7833.102941  
4,2,2464.255814  
4,2,1729.167500  
4,2,1772.255102  
4,2,5297.307692  
4,2,1966.416667  
4,2,6887.655172  
4,2,5741.398936  
4,2,3648.000000  
4,2,1585.366379  
4,2,1655.343750  
4,2,2538.171053  
4,2,2422.393617  
4,2,4077.325000  
4,2,7871.036932  
4,2,2324.500000  
4,2,3378.044643  
4,2,6098.485849

4,2,2229.903061  
4,2,2985.259259  
4,2,1770.343750  
4,2,2374.976190  
4,2,1911.007500  
4,2,3356.800000  
4,2,1600.082386  
4,2,2395.587838  
4,2,1798.175000  
4,2,1758.575758  
4,2,1501.671875  
4,2,2827.740741  
4,2,1744.810976  
4,2,1578.125000  
4,2,1954.765957  
4,2,2837.083333  
4,2,2806.668182  
4,2,1627.857143  
4,2,8251.422819  
4,2,3048.167614  
4,2,1684.971875  
4,2,1782.293981  
4,2,2613.462209  
4,2,1622.339623  
4,2,1952.719512  
4,2,2260.977941  
4,2,1574.791667  
4,2,6268.218750  
4,2,7521.906250  
4,2,2097.072917  
4,2,3242.370614  
4,2,2085.620098  
4,2,2220.157895  
4,2,1887.193182  
4,2,2344.740000  
4,2,3903.464286  
4,2,1978.980769  
4,2,2325.194444  
4,2,1722.375000  
4,2,1667.256098  
4,2,2319.500000  
4,2,2327.953125  
4,2,1574.639423  
4,2,2465.585106  
4,2,3898.089286  
4,2,5106.875000  
4,2,1715.375000  
4,2,1808.481132  
4,2,1520.937500  
4,2,2089.125000  
4,2,1882.750000  
4,2,2201.079861  
4,2,3922.072727  
4,2,3669.312500  
4,2,1705.869318  
4,2,6298.055147  
4,2,2007.962264  
4,2,1656.296512  
4,2,6661.896739  
4,2,1936.909091  
4,2,1639.650602  
4,2,2886.247768  
4,2,1964.652083  
4,2,2141.972561  
4,2,5373.783898  
4,2,2847.812500

4,2,1989.457500  
4,2,3586.440678  
4,2,2214.687500  
4,2,7517.451923  
4,2,16002.261364  
4,2,1920.189189  
4,2,1516.000000  
4,2,16255.212963  
4,2,2115.307692  
4,2,1751.777542  
4,2,1719.293478  
4,2,1555.695833  
4,2,1523.909091  
4,2,1821.799020  
4,2,3068.000000  
4,2,2003.647059  
4,2,2101.142157  
4,2,5068.788265  
4,2,1782.500000  
4,2,9451.138393  
4,2,2278.765625  
4,2,3029.561224  
4,2,1605.406863  
4,2,1574.546875  
4,2,2433.617021  
4,2,4656.306122  
4,2,2330.285714  
4,2,3949.321429  
4,2,2359.743590  
4,2,2836.062500  
4,2,1537.687500  
4,2,3304.843750  
4,2,4230.866477  
4,2,5600.288462  
4,2,2247.708333  
4,2,2427.206897  
4,2,2815.187500  
4,2,2260.630000  
4,2,4755.875000  
4,2,2042.303571  
4,2,1798.785326  
4,2,2079.648026  
4,2,2652.538462  
4,2,2315.962264  
4,2,2501.255814  
4,2,2619.828804  
4,2,1545.889535  
4,2,3817.528302  
4,2,1663.361702  
4,2,2038.826087  
4,2,2108.055233  
4,2,2379.625000  
4,2,2011.151596  
4,2,2340.040816  
4,2,2396.735849  
4,2,1642.086957  
4,2,3757.615385  
4,2,2493.947917  
4,2,1856.647727  
4,2,2694.209302  
4,2,4114.148649  
4,2,1575.634146  
4,2,2752.707547  
4,2,2451.375000  
4,2,3154.404255  
4,2,2722.413043

4,2,1660.747340  
4,2,2215.966667  
4,2,1836.830357  
4,2,2079.053191  
4,2,1849.970588  
4,2,1714.575000  
4,2,4137.732143  
4,2,1754.877907  
4,2,2535.423469  
4,2,1577.800000  
4,2,1924.601064  
4,2,2551.378049  
4,2,2130.381410  
4,2,3987.958333  
4,2,2137.150641  
4,2,1868.632979  
4,2,1714.570312  
4,2,9421.071970  
4,2,1600.298883  
4,2,2123.893229  
4,2,1659.586735  
4,2,1716.800000  
4,2,9449.611650  
4,2,2553.348837  
4,2,1582.615625  
4,2,1875.791667  
4,2,1737.594444  
4,2,2515.655405  
4,2,2357.422222  
4,2,9397.647727  
4,2,1735.600000  
4,2,1994.916667  
4,2,5147.812500  
4,2,1883.566845  
4,2,2060.846154  
4,2,2814.166667  
4,2,1861.423077  
4,2,2253.647059  
4,2,1886.659091  
4,2,1511.875000  
4,2,3602.220588  
4,2,1895.684211  
4,2,3378.819149  
4,2,2979.322917  
4,2,2225.135135  
4,2,2187.718023  
4,2,6504.020000  
4,2,2118.569444  
4,2,1523.000000  
4,2,1616.058824  
4,2,1690.520833  
4,2,2222.535714  
4,2,2345.122500  
4,2,1879.356618  
4,2,1845.627404  
4,2,3684.943878  
4,2,2081.476190  
4,2,2162.157895  
4,2,2605.625000  
4,2,5994.533333  
4,2,1828.819853  
4,2,1520.387097  
4,2,3488.402778  
4,2,1851.406250  
4,2,1636.535714  
4,2,1745.311111

4,2,2413.500000  
4,2,1805.916667  
4,2,2969.888889  
4,2,2514.914286  
4,2,2830.616071  
4,2,2295.924623  
4,2,1673.680000  
4,2,2143.898026  
4,2,1915.847561  
4,2,1787.961538  
4,2,2005.325658  
4,2,1867.750000  
4,2,2610.717105  
4,2,2101.507353  
4,2,1703.421512  
4,2,3320.400000  
4,2,2263.204545  
4,2,1555.860294  
4,2,2170.359375  
4,2,1810.326705  
4,2,2711.149554  
4,2,1872.630952  
4,2,5103.993243  
4,2,3007.984694  
4,2,7983.272727  
4,2,2526.431122  
4,2,2198.155660  
4,2,1499.792614  
4,2,2299.536585  
4,2,1799.652778  
4,2,2072.277778  
4,2,1795.689474  
4,2,5825.464286  
4,2,5606.552632  
4,2,4762.640957  
4,2,3206.119048  
4,2,2890.901961  
4,2,1837.910256  
4,2,2104.365385  
4,2,1854.447917  
4,2,1817.065217  
4,2,2678.872024  
4,2,2545.534314  
4,2,1817.625000  
4,2,5861.673469  
4,2,2355.276442  
4,2,1702.636364  
4,2,2615.105263  
4,2,2310.051724  
4,2,8435.444444  
4,2,3695.785000  
4,2,2335.897059  
4,2,1550.954082  
4,2,1643.724138  
4,2,3272.361702  
4,2,2319.144444  
4,2,1541.290441  
4,2,5061.038265  
4,2,5515.512821  
4,2,3474.344388  
4,2,1528.540761  
4,2,1786.162162  
4,2,3542.187500  
4,2,1584.189103  
4,2,1807.980769  
4,2,2538.118590

4,2,5071.680556  
4,2,1939.458333  
4,2,1920.000000  
4,2,6831.050532  
4,2,1499.437500  
4,2,2678.941860  
4,2,1716.104167  
4,2,1885.437500  
4,2,1687.301724  
4,2,1531.925532  
4,2,2079.936047  
4,2,5741.454545  
4,2,1600.716981  
4,2,3877.025000  
4,2,2401.745000  
4,2,2942.627358  
4,2,3022.310345  
4,2,2342.593750  
4,2,1904.222222  
4,2,2860.500000  
4,2,1808.447917  
4,2,1802.115625  
4,2,1658.708333  
4,2,1776.556604  
4,2,1735.500000  
4,2,3334.348837  
4,2,1539.347222  
4,2,3147.731707  
4,2,2726.413043  
4,2,5092.068182  
4,2,2898.809783  
4,2,6280.319149  
4,2,1931.675000  
4,2,1628.648649  
4,2,8518.136905  
4,2,1736.500000  
4,2,1563.546875  
4,2,2049.276786  
4,2,1735.937500  
4,2,1637.891304  
4,2,6105.885135  
4,2,1932.471311  
4,2,3766.806452  
4,2,2460.593750  
4,2,3731.327778  
4,2,9130.750000  
4,2,1533.255319  
4,2,3418.965278  
4,2,1767.477778  
4,2,1789.663043  
4,2,1708.177778  
4,2,2738.923077  
4,2,2358.197368  
4,2,2350.776744  
4,2,2079.480769  
4,2,3102.915094  
4,2,1882.588235  
4,2,1976.557927  
4,2,3244.048780  
4,2,1791.342949  
4,2,1704.821429  
4,2,3203.068182  
4,2,2146.138298  
4,2,1903.000000  
4,2,1685.893519  
4,2,5839.898585

4,2,1637.538462  
4,2,2553.455556  
4,2,3236.412500  
4,2,2991.220588  
4,2,2511.965278  
4,2,2879.875000  
4,2,1778.005319  
4,2,1578.367347  
4,2,1534.156915  
4,2,2981.227564  
4,2,1586.347826  
4,2,3814.500000  
4,2,2108.011111  
4,2,4455.901163  
4,2,2834.951923  
4,2,1688.500000  
4,2,1696.198113  
4,2,2096.438679  
4,2,2255.957895  
4,2,1865.502907  
4,2,2823.107955  
4,2,2449.155556  
4,2,1651.382500  
4,2,3529.278509  
4,2,2778.557692  
4,2,2152.729592  
4,2,1617.995283  
4,2,2335.464286  
4,2,1682.456081  
4,2,1563.855263  
4,2,1504.940000  
4,2,2269.820122  
4,2,1637.902778  
4,2,2459.604651  
4,2,3748.502717  
4,2,1929.404255  
4,2,1602.930921  
4,2,1728.276596  
4,2,1754.000000  
4,2,1949.598039  
4,2,2391.687500  
4,2,3067.670213  
4,2,1514.792683  
4,2,1924.969697  
4,2,4384.430233  
4,2,2668.444444  
4,2,1982.657895  
4,2,1694.579545  
4,2,2887.491279  
4,2,2412.991150  
4,2,3072.898585  
4,2,1577.350000  
4,2,2504.196809  
4,2,2118.285714  
4,2,1596.250000  
4,2,1593.719444  
4,2,1843.335938  
4,2,1840.242647  
4,2,2685.933333  
4,2,2062.525568  
4,2,1943.574468  
4,2,3991.090164  
4,2,1634.416667  
4,2,1960.799342  
4,2,1738.443878  
4,2,2606.736111

4,2,2291.861111  
4,2,1824.803279  
4,2,1618.056250  
4,2,2383.941176  
4,2,1918.130102  
4,2,1837.442308  
4,2,1707.544444  
4,2,1801.930233  
4,2,4678.011628  
4,2,1920.497685  
4,2,2953.165541  
4,2,1671.295732  
4,2,2433.025000  
4,2,1977.825581  
4,2,5709.235795  
4,2,2091.031250  
4,2,3971.462838  
4,2,4200.580645  
4,2,2236.050000  
4,2,3936.207447  
4,2,1499.901316  
4,2,1977.293478  
4,2,17732.835227  
4,2,1631.585366  
4,2,2914.285714  
4,2,2962.494681  
4,2,2038.233796  
4,2,1806.830769  
4,2,1705.625000  
4,2,2420.818182  
4,2,1796.800000  
4,2,2180.800000  
4,2,2400.334239  
4,2,1614.918919  
4,2,2452.177632  
4,2,2269.281407  
4,2,2373.329787  
4,2,2460.541916  
4,2,3101.579710  
4,2,18841.979167  
4,2,2444.465116  
4,2,2003.578431  
4,2,2482.895000  
4,2,9291.680851  
4,2,2194.322917  
4,2,1689.934375  
4,2,1530.093750  
4,2,4617.800532  
4,2,14781.337500  
4,2,1551.960938  
4,2,2978.400000  
4,2,13832.557143  
4,2,1815.712500  
4,2,2522.346154  
4,2,4983.937500  
4,2,2103.812500  
4,2,1556.466667  
4,2,1515.296296  
4,2,12652.776596  
4,2,1730.666667  
4,2,2374.500000  
4,2,2058.416667  
4,2,2045.000000  
4,2,1820.566327  
4,2,6971.442073  
4,2,1930.802326

4,2,2062.217105  
4,2,5366.628571  
4,2,2379.085937  
4,2,4139.119186  
4,2,1559.285714  
4,2,1980.615385  
4,2,3764.946429  
4,2,3363.819712  
4,2,1630.460227  
4,2,9928.612745  
4,2,3707.250000  
4,2,2762.218750  
4,2,19405.113636  
4,2,16036.218750  
4,2,1960.666667  
4,2,1608.462963  
4,2,2281.238095  
4,2,4808.148810  
4,2,1913.178125  
4,2,7879.051020  
4,2,1501.135135  
4,2,2608.826531  
4,2,13460.195122  
4,2,1724.165541  
4,2,1971.458333  
4,2,1505.333333  
4,2,2314.853125  
4,2,3937.460648  
4,2,2357.000000  
4,2,1811.000000  
4,2,9728.314516  
4,2,2066.242021  
4,2,1763.000000  
4,2,3338.798913  
4,2,7843.680851  
4,2,2322.062500  
4,2,5677.027174  
4,2,2004.806604  
4,2,1871.760000  
4,2,3726.540000  
4,2,2699.244681  
4,2,6384.370833  
4,2,2844.018293  
4,2,1970.102273  
4,2,15437.470588  
4,2,1585.803241  
4,2,7997.109756  
4,2,1965.886364  
4,2,11786.388393  
4,2,4459.488636  
4,2,1911.829268  
4,2,2533.022500  
4,2,1537.215116  
4,2,6705.156250  
4,2,4758.977564  
4,2,1639.194444  
4,2,2234.938953  
4,2,4874.306373  
4,2,4976.218543  
4,2,5658.981132  
4,2,1759.109649  
4,2,1883.996622  
4,2,3112.580000  
4,2,5724.407328  
4,2,2053.796512  
4,2,4681.908482

4,2,19749.402439  
4,2,2659.737805  
4,2,1922.100000  
4,2,1663.241477  
4,2,4096.046512  
4,2,1715.270833  
4,2,1609.687500  
4,2,2718.723684  
4,2,1943.325581  
4,2,1925.163043  
4,2,1508.537975  
4,2,3744.245283  
4,2,5063.976190  
4,2,1698.552326  
4,2,1626.875000  
4,2,1860.906250  
4,2,2658.395000  
4,2,10924.165323  
4,2,1731.827128  
4,2,3116.833333  
4,2,5446.357143  
4,2,3150.554054  
4,2,2615.363636  
4,2,2681.346154  
4,2,2638.414474  
4,2,2068.439698  
4,2,1643.375000  
4,2,2838.031250  
4,2,1629.605263  
4,2,1577.127119  
4,2,5090.784091  
4,2,2119.818182  
4,2,1721.672131  
4,2,2118.932292  
4,2,1923.078947  
4,2,1749.462963  
4,2,2147.918367  
4,2,6140.800000  
4,2,3242.122596  
4,2,1549.038462  
4,2,2810.704545  
4,2,7381.818750  
4,2,1640.051630  
4,2,1858.537500  
4,2,2088.046875  
4,2,1790.015957  
4,2,3355.187500  
4,2,1843.407143  
4,2,8060.064815  
4,2,1691.280303  
4,2,1805.272727  
4,2,2316.355769  
4,2,8633.397059  
4,2,2831.767857  
4,2,13123.708333  
4,2,1602.662791  
4,2,3323.187500  
4,2,1594.037736  
4,2,2747.295455  
4,2,2248.985849  
4,2,2393.222222  
4,2,4642.375000  
4,2,3495.296196  
4,2,1745.087209  
4,2,2239.229911  
4,2,1929.522727

4,2,1720.645349  
4,2,2108.735294  
4,2,2174.725962  
4,2,2883.775000  
4,2,1825.166667  
4,2,1584.022436  
4,2,1579.527174  
4,2,2438.271875  
4,2,1766.485465  
4,2,5649.157895  
4,2,2648.045455  
4,2,1883.166667  
4,2,2742.011719  
4,2,3820.892857  
4,2,1686.687500  
4,2,3169.941176  
4,2,2128.000000  
4,2,5310.604545  
4,2,12597.719595  
4,2,2490.279891  
4,2,9825.642045  
4,2,1920.902439  
4,2,2734.677273  
4,2,1987.113889  
4,2,1499.678571  
4,2,1610.464286  
4,2,2034.769231  
4,2,1847.011364  
4,2,1806.866667  
4,2,2099.468750  
4,2,1657.894231  
4,2,14103.632353  
4,2,2115.071429  
4,2,1969.268750  
4,2,1568.190000  
4,2,1604.817568  
4,2,1751.713542  
4,2,1592.964467  
4,2,1564.560811  
4,2,3048.673913  
4,2,2029.951389  
4,2,1683.127660  
4,2,2587.489796  
4,2,2050.517157  
4,2,11768.866120  
4,2,1934.304054  
4,2,2687.000000  
4,2,1703.812500  
4,2,5757.800926  
4,2,1808.589286  
4,2,1543.571429  
4,2,3025.340426  
4,2,2389.272727  
4,2,1638.361111  
4,2,13970.425000  
4,2,1740.684524  
4,2,1557.848684  
4,2,2271.963889  
4,2,2794.625000  
4,2,1517.340426  
4,2,4924.732955  
4,2,2009.358108  
4,2,4046.878571  
4,2,1713.137255  
4,2,2164.146226  
4,2,3496.810811

4,2,1886.840426  
4,2,2375.409722  
4,2,8056.927885  
4,2,2987.716667  
4,2,1998.875000  
4,2,2754.593750  
4,2,1533.263889  
4,2,3129.743421  
4,2,3245.902439  
4,2,2858.690000  
4,2,1507.465116  
4,2,16829.143617  
4,2,2238.857143  
4,2,2079.084906  
4,2,1674.235294  
4,2,1641.450000  
4,2,13306.828125  
4,2,3003.089623  
4,2,1692.585366  
4,2,4783.512500  
4,2,1928.324324  
4,2,1855.597561  
4,2,17903.604839  
4,2,2690.267045  
4,2,2100.635417  
4,2,2289.596154  
4,2,5118.072222  
4,2,6015.738636  
4,2,2559.006250  
4,2,2072.173077  
4,2,1595.345000  
4,2,1504.964286  
4,2,3789.875000  
4,2,1542.409091  
4,2,1877.675926  
4,2,2407.575472  
4,2,2736.963542  
4,2,2171.732558  
4,2,2396.574468  
4,2,1668.918367  
4,2,3897.074468  
4,2,2471.571429  
4,2,1523.750000  
4,2,1683.743017  
4,2,2261.945513  
4,2,1951.569712  
4,2,2671.924528  
4,2,3775.054688  
4,2,2684.476351  
4,2,1794.434524  
4,2,5002.967105  
4,2,4734.176630  
4,2,1791.055147  
4,2,10075.242788  
4,2,5311.337766  
4,2,1970.809524  
4,2,1827.180233  
4,2,4705.044118  
4,2,1915.100000  
4,2,5315.159375  
4,2,2077.562500  
4,2,1537.184524  
4,2,2893.706522  
4,2,2747.926829  
4,2,1864.250000  
4,2,2928.572368

4,2,3400.989130  
4,2,1834.935897  
4,2,19678.552083  
4,2,3322.747768  
4,2,4437.149306  
4,2,1748.846154  
4,2,5175.365385  
4,2,1784.447674  
4,2,1748.725694  
4,2,2214.517857  
4,2,2558.190217  
4,2,7477.932292  
4,2,1954.418367  
4,2,1788.776316  
4,2,1653.816810  
4,2,1563.840686  
4,2,2167.510204  
4,2,2962.546875  
4,2,3134.809524  
4,2,2984.650510  
4,2,1615.573171  
4,2,1509.550000  
4,2,2031.395833  
4,2,1571.739362  
4,2,1920.173469  
4,2,3838.702703  
4,2,2489.433333  
4,2,7704.119048  
4,2,3624.723404  
4,2,1575.947674  
4,2,1651.433962  
4,2,2138.028846  
4,2,2134.450000  
4,2,1529.552885  
4,2,3797.036765  
4,2,4294.028061  
4,2,2644.043478  
4,2,9260.535714  
4,2,1544.100000  
4,2,2435.432292  
4,2,2246.468750  
4,2,1886.154412  
4,2,2596.625000  
4,2,1577.878049  
4,2,4026.678571  
4,2,1509.075521  
4,2,1740.774390  
4,2,2201.906977  
4,2,2848.420732  
4,2,1704.235000  
4,2,7035.707031  
4,2,3067.530000  
4,2,2109.358696  
4,2,2036.020833  
4,2,1695.268229  
4,2,1905.360000  
4,2,1638.462766  
4,2,2190.640625  
4,2,1707.664634  
4,2,5521.595588  
4,2,3209.997093  
4,2,3741.312500  
4,2,3313.784314  
4,2,2303.486413  
4,2,1878.750000  
4,2,2038.560000

4,2,2784.564103  
4,2,2532.691489  
4,2,6819.812500  
4,2,2903.225000  
4,2,1927.565217  
4,2,2027.490132  
4,2,6018.324324  
4,2,1726.285714  
4,2,2960.012500  
4,2,2393.635417  
4,2,2488.656250  
4,2,3833.458333  
4,2,3022.402174  
4,2,2984.184524  
4,2,1666.259146  
4,2,2001.743304  
4,2,2348.548913  
4,2,2101.278646  
4,2,2926.219697  
4,2,13105.355769  
4,2,1542.349057  
4,2,2253.375000  
4,2,1702.535714  
4,2,1764.824405  
4,2,1978.379808  
4,2,2469.764205  
4,2,1849.125000  
4,2,1932.410326  
4,2,1850.569767  
4,2,3088.000000  
4,2,3416.260638  
4,2,2017.106707  
4,2,2579.202128  
4,2,1559.046512  
4,2,1991.443750  
4,2,3469.459016  
4,2,1550.187500  
4,2,10186.434211  
4,2,1954.653846  
4,2,2205.327778  
4,2,1738.529412  
4,2,1939.212766  
4,2,2958.156250  
4,2,6384.658537  
4,2,1572.714286  
4,2,6930.673387  
4,2,2350.959677  
4,2,1588.218023  
4,2,5568.817568  
4,2,1560.077586  
4,2,5378.301471  
4,2,2897.650000  
4,2,2188.714286  
4,2,3355.342949  
4,2,5843.641304  
4,2,3735.940789  
4,2,3564.404661  
4,2,2978.216216  
4,2,2869.038265  
4,2,2708.447368  
4,2,1629.490000  
4,2,1954.811170  
4,2,2646.989130  
4,2,2144.204082  
4,2,2570.965426  
4,2,1734.447368

4,2,2345.427419  
4,2,2547.500000  
4,2,2244.608696  
4,2,1557.194444  
4,2,1672.392500  
4,2,1698.046053  
4,2,5992.172589  
4,2,1610.352941  
4,2,2433.088542  
4,2,3178.737500  
4,2,2901.681818  
4,2,2959.514706  
4,2,1715.305556  
4,2,5531.897436  
4,2,2344.802326  
4,2,1639.264205  
4,2,1938.000000  
4,2,2799.679348  
4,2,2808.826923  
4,2,3657.451613  
4,2,7045.523810  
4,2,1748.298780  
4,2,1728.854167  
4,2,7036.760870  
4,2,1546.207447  
4,2,6173.883721  
4,2,3599.377451  
4,2,3677.471591  
4,2,2141.049419  
4,2,1552.580882  
4,2,1718.800000  
4,2,5274.631579  
4,2,2404.148936  
4,2,1644.812500  
4,2,1810.182927  
4,2,5533.650794  
4,2,1511.568182  
4,2,2400.415761  
4,2,2587.480769  
4,2,1740.195122  
4,2,2835.622449  
4,2,1918.767500  
4,2,2926.744681  
4,2,2010.653226  
4,2,5768.562500  
4,2,1499.485437  
4,2,2000.552632  
4,2,2815.632353  
4,2,3469.630435  
4,2,4108.037234  
4,2,3355.548387  
4,2,3475.455882  
4,2,2635.135638  
4,2,1632.071429  
4,2,3697.706081  
4,2,2946.305233  
4,2,1507.744898  
4,2,3823.428922  
4,2,2228.335938  
4,2,2336.835000  
4,2,1657.310345  
4,2,5010.636364  
4,2,2204.866071  
4,2,1944.859375  
4,2,1812.118421  
4,2,2666.744681

4,2,1521.312500  
4,2,2696.458333  
4,2,2213.825000  
4,2,1902.085227  
4,2,1981.078431  
4,2,2057.698864  
4,2,2173.396635  
4,2,2564.541667  
4,2,2694.631579  
4,2,1730.062500  
4,2,3262.811321  
4,2,2232.771635  
4,2,4750.617021  
4,2,1507.733333  
4,2,1665.237226  
4,2,2475.320313  
4,2,2533.007353  
4,2,12671.492857  
4,2,10594.500000  
4,2,4820.016667  
4,2,1722.090517  
4,2,1762.766304  
4,2,2986.000000  
4,2,1667.375000  
4,2,2613.921875  
4,2,2825.958333  
4,2,2228.156863  
4,2,1696.229651  
4,2,2550.666667  
4,2,2267.693182  
4,2,3424.103448  
4,2,2576.914894  
4,2,1770.069767  
4,2,2355.102500  
4,2,3790.290625  
4,2,2255.301887  
4,2,2389.471698  
4,2,3837.130000  
4,2,1803.134615  
4,2,1789.229167  
4,2,3366.296875  
4,2,2336.000000  
4,2,4656.959184  
4,2,8023.686321  
4,2,3785.986607  
4,2,1593.525000  
4,2,2353.375000  
4,2,1577.321429  
4,2,5302.833333  
4,2,3862.669811  
4,2,5104.330357  
4,2,2104.077830  
4,2,2708.754310  
4,2,2100.627660  
4,2,7102.437500  
4,2,1731.345455  
4,2,1695.027778  
4,2,2693.739362  
4,2,2489.546053  
4,2,1726.208333  
4,2,2700.672222  
4,2,2205.541237  
4,2,1510.062500  
4,2,5283.869792  
4,2,1574.642500  
4,2,1885.166667

4,2,2897.219388  
4,2,1689.739583  
4,2,3230.664773  
4,2,2361.428191  
4,2,2087.657738  
4,2,1892.659574  
4,2,1511.636364  
4,2,3867.408163  
4,2,9985.321078  
4,2,1526.659574  
4,2,2003.024457  
4,2,13022.445946  
4,2,2302.607843  
4,2,2229.960106  
4,2,1526.842391  
4,2,2574.430233  
4,2,1847.132653  
4,2,10489.531250  
4,2,2300.622642  
4,2,1948.769231  
4,2,3605.762500  
4,2,5048.804348  
4,2,4116.912500  
4,2,6208.891204  
4,2,7200.119444  
4,2,2382.524390  
4,2,2296.116071  
4,2,2102.882653  
4,2,1824.175676  
4,2,2245.046875  
4,2,4244.375000  
4,2,4772.944444  
4,2,2230.053191  
4,2,2226.612245  
4,2,2833.103365  
4,2,6990.634615  
4,2,1537.562500  
4,2,1863.375000  
4,2,2097.173469  
4,2,16592.304688  
4,2,2882.350000  
4,2,2738.770408  
4,2,1620.669271  
4,2,6943.750000  
4,2,1744.107759  
4,2,2159.038043  
4,2,1994.091667  
4,2,1626.176471  
4,2,1517.426829  
4,2,3040.881048  
4,2,3627.625000  
4,2,2508.333333  
4,2,1626.393293  
4,2,5862.648649  
4,2,1566.585938  
4,2,2211.111111  
4,2,1768.343750  
4,2,2906.650000  
4,2,2971.666667  
4,2,4098.437500  
4,2,1582.011111  
4,2,1723.718750  
4,2,2262.780000  
4,2,2132.726744  
4,2,1806.275000  
4,2,1966.088235

4,2,1889.396226  
4,2,2118.075000  
4,2,1640.054054  
4,2,4118.730769  
4,2,1734.421053  
4,2,2118.727778  
4,2,2267.364035  
4,2,2898.055556  
4,2,3696.150538  
4,2,1629.640625  
4,2,1991.130952  
4,2,1569.833333  
4,2,1657.000000  
4,2,1767.701389  
4,2,1668.593750  
4,2,3411.000000  
4,2,2075.387097  
4,2,6182.765957  
4,2,1542.593750  
4,2,1727.011364  
4,2,3035.164474  
4,2,2177.101562  
4,2,2626.542553  
4,2,1802.500000  
4,2,3828.112069  
4,2,1617.641026  
4,2,5066.697500  
4,2,2722.235000  
4,2,3536.807292  
4,2,2651.265306  
4,2,2246.152778  
4,2,2053.531915  
4,2,1553.932927  
4,2,1864.213068  
4,2,2719.823529  
4,2,1602.596939  
4,2,1822.706522  
4,2,4077.675000  
4,2,1563.909091  
4,2,1549.674419  
4,2,2231.468750  
4,2,4749.391204  
4,2,4185.070652  
4,2,8287.035714  
4,2,1765.649390  
4,2,2909.079787  
4,2,6895.065217  
4,2,3605.783019  
4,2,1551.512500  
4,2,1808.260204  
4,2,2524.850806  
4,2,1623.535714  
4,2,1553.298913  
4,2,4345.894608  
4,2,1578.382813  
4,2,1913.851190  
4,2,3822.196721  
4,2,2526.704268  
4,2,2978.892157  
4,2,1662.816176  
4,2,2970.545455  
4,2,1690.927885  
4,2,15901.705645  
4,2,2186.877551  
4,2,1550.100000  
4,2,4169.568452

4,2,1672.897959  
4,2,1909.817073  
4,2,2010.558333  
4,2,2017.365385  
4,2,2323.244681  
4,2,2198.112805  
4,2,3375.807143  
4,2,1762.465116  
4,2,8068.734375  
4,2,3544.379310  
4,2,2121.925532  
4,2,2242.595745  
4,2,2035.127717  
4,2,2093.419355  
4,2,2030.000000  
4,2,1980.195652  
4,2,6215.960000  
4,2,1839.320652  
4,2,18528.413462  
4,2,2703.933333  
4,2,5313.000000  
4,2,2016.067568  
4,2,2044.945946  
4,2,1870.463542  
4,2,1760.570000  
4,2,1756.571429  
4,2,4680.160494  
4,2,2065.247283  
4,2,3708.563253  
4,2,4222.754717  
4,2,2210.922414  
4,2,1695.615385  
4,2,2504.826087  
4,2,2973.856383  
4,2,2194.903061  
4,2,1840.895000  
4,2,1604.308511  
4,2,1949.554348  
4,2,2599.596154  
4,2,2650.400943  
4,2,1558.913043  
4,2,1571.340278  
4,2,1639.780000  
4,2,2301.593085  
4,2,1927.482759  
4,2,1974.073171  
4,2,18472.767442  
4,2,1600.509615  
4,2,1882.085366  
4,2,2681.293605  
4,2,1960.500000  
4,2,7143.352941  
4,2,2715.750000  
4,2,1562.569444  
4,2,3993.700000  
4,2,3938.210526  
4,2,2481.424528  
4,2,1807.705357  
4,2,2143.604651  
4,2,5200.915094  
4,2,2398.390625  
4,2,2785.875000  
4,2,1533.669811  
4,2,2913.897959  
4,2,1531.696429  
4,2,1508.823529

4,2,3015.239583  
4,2,2138.804878  
4,2,2588.120283  
4,2,1977.007353  
4,2,2927.785714  
4,2,3183.340426  
4,2,3565.237805  
4,2,3235.062500  
4,2,1561.600000  
4,2,2046.608696  
4,2,2457.973262  
4,2,3262.517442  
4,2,12889.775000  
4,2,2866.877451  
4,2,1577.392857  
4,2,2175.175532  
4,2,2325.365854  
4,2,1563.576923  
4,2,14227.385417  
4,2,1934.900000  
4,2,3803.712500  
4,2,5567.857143  
4,2,1519.615385  
4,2,2157.900000  
4,2,1522.250000  
4,2,4067.165000  
4,2,2212.139423  
4,2,4039.750000  
4,2,1654.149457  
4,2,2729.978261  
4,2,4271.666667  
4,2,7077.065789  
4,2,1799.281250  
4,2,2059.982955  
4,2,1846.207237  
4,2,1835.584677  
4,2,2019.639286  
4,2,2923.012019  
4,2,2161.502660  
4,2,1908.308140  
4,2,2663.108696  
4,2,2072.218750  
4,2,2712.323529  
4,2,1814.546296  
4,2,1774.073529  
4,2,3664.769737  
4,2,5884.514706  
4,2,2412.875000  
4,2,1620.958333  
4,2,1646.929054  
4,2,4336.448864  
4,2,2122.211538  
4,2,2337.112245  
4,2,2008.279070  
4,2,3816.454082  
4,2,1746.375000  
4,2,2370.920000  
4,2,2314.597561  
4,2,5114.200472  
4,2,1718.812500  
4,2,4036.227273  
4,2,3457.037736  
4,2,7318.979730  
4,2,1599.971698  
4,2,1600.650568  
4,2,2454.880000

4,2,1866.734375  
4,2,1780.967213  
4,2,2419.875000  
4,2,2839.732143  
4,2,2563.703704  
4,2,1839.238636  
4,2,5457.306604  
4,2,3283.821429  
4,2,4478.808673  
4,2,6063.600000  
4,2,1580.396552  
4,2,2504.886628  
4,2,2420.712500  
4,2,1566.255682  
4,2,2452.393617  
4,2,2174.992647  
4,2,1744.891304  
4,2,3138.052083  
4,2,1794.145000  
4,2,2357.982143  
4,2,1757.441860  
4,2,2097.361111  
4,2,3204.600000  
4,2,3500.245283  
4,2,2086.107955  
4,2,2281.957447  
4,2,4027.502604  
4,2,5462.225000  
4,2,2019.029412  
4,2,1580.514286  
4,2,1885.971154  
4,2,2073.826923  
4,2,4114.222222  
4,2,4558.847222  
4,2,4017.750000  
4,2,3157.837209  
4,2,3840.701220  
4,2,1816.713942  
4,2,1596.212766  
4,2,2047.398810  
4,2,3782.579545  
4,2,1704.997500  
4,2,3123.018293  
4,2,1555.040698  
4,2,3854.547619  
4,2,4414.645833  
4,2,2920.167763  
4,2,1687.850000  
4,2,1499.696809  
4,2,1948.768868  
4,2,8537.420000  
4,2,5464.263158  
4,2,5213.550000  
4,2,1527.342105  
4,2,2393.130952  
4,2,3303.150259  
4,2,1656.857143  
4,2,2162.955000  
4,2,3911.547872  
4,2,1567.087838  
4,2,1900.729730  
4,2,3920.101036  
4,2,3120.265000  
4,2,2328.367188  
4,2,2832.829268  
4,2,3237.079787

4,2,2028.361111  
4,2,1563.214744  
4,2,3999.607143  
4,2,1675.050481  
4,2,1900.563830  
4,2,2083.143617  
4,2,2651.805233  
4,2,1668.085938  
4,2,1595.643617  
4,2,4597.671875  
4,2,2692.560811  
4,2,2052.924419  
4,2,6553.642857  
4,2,1521.269531  
4,2,1926.287500  
4,2,2226.875000  
4,2,2085.810345  
4,2,2901.333333  
4,2,1788.648515  
4,2,1587.739583  
4,2,2177.432292  
4,2,3937.958333  
4,2,1700.357500  
4,2,1778.080000  
4,2,3049.057143  
4,2,1520.858696  
4,2,2586.160804  
4,2,3189.300000  
4,2,3078.280488  
4,2,3963.419118  
4,2,1923.165000  
4,2,2416.578125  
4,2,3070.447115  
4,2,1714.581395  
4,2,1709.677500  
4,2,2038.797872  
4,2,3240.961957  
4,2,2104.445000  
4,2,1896.089286  
4,2,2129.605263  
4,2,1638.701087  
4,2,4538.448980  
4,2,1818.325000  
4,2,1578.322368  
4,2,6848.125000  
4,2,4471.736842  
4,2,4618.500000  
4,2,2940.203125  
4,2,2268.337209  
4,2,5134.508333  
4,2,2085.913043  
4,2,2139.784884  
4,2,7065.594595  
4,2,3608.866071  
4,2,2130.985294  
4,2,1915.237745  
4,2,6542.497222  
4,2,1867.018868  
4,2,1650.906977  
4,2,1762.451923  
4,2,3517.855769  
4,2,1813.408333  
4,2,2729.818182  
4,2,13682.147727  
4,2,2833.290816  
4,2,2829.893617

4,2,1507.429245  
4,2,1597.945513  
4,2,4942.068627  
4,2,1576.928571  
4,2,2191.742188  
4,2,3139.375000  
4,2,1592.175532  
4,2,1610.139423  
4,2,1835.575000  
4,2,1921.059375  
4,2,1857.590062  
4,2,3804.052326  
4,2,3249.710938  
4,2,4937.118056  
4,2,2398.404412  
4,2,4500.532609  
4,2,5528.698661  
4,2,5918.619048  
4,2,2591.493421  
4,2,1782.268293  
4,2,1912.534091  
4,2,2148.806122  
4,2,1913.924479  
4,2,2045.145000  
4,2,1613.704545  
4,2,7634.326271  
4,2,8333.930085  
4,2,4216.275000  
4,2,3787.858491  
4,2,1659.542614  
4,2,5583.090909  
4,2,1696.754717  
4,2,2397.514286  
4,2,1815.976744  
4,2,1953.393939  
4,2,1904.000000  
4,2,1518.784091  
4,2,3673.063830  
4,2,3651.676471  
4,2,2373.902778  
4,2,2164.734375  
4,2,3174.119898  
4,2,3528.370192  
4,2,1723.639810  
4,2,2313.294872  
4,2,15032.285714  
4,2,2262.581522  
4,2,1799.956522  
4,2,1989.727273  
4,2,2340.454268  
4,2,1562.425000  
4,2,2170.098684  
4,2,4794.340625  
4,2,1824.005682  
4,2,2389.756757  
4,2,2382.848684  
4,2,1592.892157  
4,2,1949.768519  
4,2,2622.174020  
4,2,2068.615385  
4,2,9326.778075  
4,2,1977.979592  
4,2,3438.923077  
4,2,2694.711111  
4,2,2363.020833  
4,2,4956.278846

4,2,1640.011765  
4,2,2216.325000  
4,2,4002.658654  
4,2,1588.787162  
4,2,3044.644737  
4,2,2453.917683  
4,2,3045.055851  
4,2,1562.029891  
4,2,1603.825000  
4,2,2920.521739  
4,2,10002.184524  
4,2,1651.810000  
4,2,1903.479167  
4,2,1984.580000  
4,2,1716.000000  
4,2,1857.401786  
4,2,1652.015625  
4,2,1959.414216  
4,2,2061.250000  
4,2,3526.100000  
4,2,1698.727273  
4,2,1707.783784  
4,2,3441.800532  
4,2,2078.843750  
4,2,1939.152778  
4,2,1706.761628  
4,2,3708.727273  
4,2,9371.500000  
4,2,3376.178977  
4,2,2920.171875  
4,2,4690.440789  
4,2,2709.281553  
4,2,3010.333333  
4,2,4490.182692  
4,2,1576.994186  
4,2,1693.763587  
4,2,2245.304545  
4,2,2712.571970  
4,2,3327.146341  
4,2,2237.935897  
4,2,2410.250000  
4,2,2658.961111  
4,2,4324.652027  
4,2,3204.541667  
4,2,5810.095238  
4,2,7491.869565  
4,2,3555.992788  
4,2,4154.621951  
4,2,4841.601190  
4,2,2821.187151  
4,2,1709.142857  
4,2,2349.968750  
4,2,2712.891892  
4,2,1879.247283  
4,2,5044.745614  
4,2,2049.448113  
4,2,1701.110465  
4,2,2161.625000  
4,2,4577.114796  
4,2,2681.558511  
4,2,2631.574324  
4,2,1815.354839  
4,2,1773.852941  
4,2,1557.625000  
4,2,16216.453125  
4,2,1776.845588

4,2,4675.978261  
4,2,3747.122283  
4,2,2452.166667  
4,2,2575.512821  
4,2,2325.542553  
4,2,2034.156250  
4,2,2448.817500  
4,2,3951.305851  
4,2,5450.667500  
4,2,5885.256098  
4,2,1537.753289  
4,2,3117.048913  
4,2,12267.922222  
4,2,1859.285714  
4,2,3167.921875  
4,2,2643.605769  
4,2,9147.174342  
4,2,2433.684783  
4,2,2829.880435  
4,2,2052.845455  
4,2,5403.000000  
4,2,2322.914894  
4,2,1695.722973  
4,2,2688.398438  
4,2,1963.750000  
4,2,2790.441038  
4,2,1679.375000  
4,2,2475.375000  
4,2,3955.395833  
4,2,3478.263587  
4,2,1669.610795  
4,2,1639.668605  
4,2,1554.250000  
4,2,2132.491071  
4,2,2143.105978  
4,2,1608.000000  
4,2,2130.964286  
4,2,4223.386364  
4,2,1814.703125  
4,2,1571.483696  
4,2,3158.431818  
4,2,2029.289474  
4,2,2088.567708  
4,2,2964.087500  
4,2,1915.539474  
4,2,7698.114286  
4,2,9271.145000  
4,2,3112.075000  
4,2,1957.701613  
4,2,3301.856771  
4,2,1818.357143  
4,2,3629.094388  
4,2,3863.918478  
4,2,2169.372549  
4,2,1907.964674  
4,2,1850.312500  
4,2,2338.555556  
4,2,1525.865854  
4,2,2237.809659  
4,2,1664.836538  
4,2,2476.354167  
4,2,1906.819767  
4,2,3410.835526  
4,2,2645.211310  
4,2,1611.445946  
4,2,1519.928571

4,2,3195.867788  
4,2,2151.133333  
4,2,2318.400000  
4,2,1637.858108  
4,2,2270.435714  
4,2,2531.118056  
4,2,2442.993750  
4,2,5007.025000  
4,2,2076.117188  
4,2,1729.128049  
4,2,4432.375000  
4,2,1546.133929  
4,2,1925.327128  
4,2,7950.095109  
5,1,2338.812500  
5,1,5555.642857  
5,1,1872.122449  
5,1,1845.355556  
5,1,1568.951220  
5,1,4494.795455  
5,1,2993.950000  
5,1,1771.323529  
5,1,3102.445652  
5,1,4430.877841  
5,1,13116.658019  
5,1,1713.538889  
5,1,4780.375000  
5,1,6038.678571  
5,1,4694.088710  
5,1,3147.949324  
5,1,3313.777778  
5,1,15451.340000  
5,1,2410.342742  
5,1,3348.362179  
5,1,5993.027027  
5,1,4279.721774  
5,1,4792.464286  
5,1,1934.208333  
5,1,2555.213415  
5,1,8566.637931  
5,1,3325.617188  
5,1,3836.772727  
5,1,1621.122449  
5,1,2088.000000  
5,1,2810.575000  
5,1,1804.336957  
5,1,19085.781250  
5,1,5661.868243  
5,1,2435.980263  
5,1,2579.487500  
5,1,1770.427326  
5,1,2317.163043  
5,1,2379.328125  
5,1,1763.779412  
5,1,6195.980469  
5,1,2438.057692  
5,1,9709.642857  
5,1,16038.360000  
5,1,2450.403846  
5,1,2859.536585  
5,1,10269.125000  
5,1,9173.401316  
5,1,17959.367188  
5,1,2654.546512  
5,1,3007.375000  
5,1,10709.887500

5,1,3853.311170  
5,1,11845.367925  
5,1,1612.914773  
5,1,3596.460526  
5,1,1977.083333  
5,1,13893.384146  
5,1,6149.246622  
5,1,1850.222973  
5,1,2016.859848  
5,1,1532.771341  
5,1,14442.739583  
5,1,1966.777027  
5,1,1874.633721  
5,1,4541.875000  
5,1,2952.139535  
5,1,5413.413462  
5,1,5442.450000  
5,1,1582.000000  
5,1,19485.034884  
5,1,3390.769737  
5,1,2598.104167  
5,1,3412.063953  
5,1,8921.111111  
5,1,4165.125000  
5,1,3599.057143  
5,1,9012.946429  
5,1,10924.500000  
5,1,13004.692308  
5,1,1819.303571  
5,1,2969.922222  
5,1,7090.627907  
5,1,2931.246795  
5,1,5601.293478  
5,1,2192.057143  
5,1,2763.000000  
5,1,6782.619565  
5,1,11678.307927  
5,1,2157.536765  
5,1,19282.161184  
5,1,3899.507353  
5,1,1545.966667  
5,1,2949.980769  
5,1,6139.807143  
5,1,2237.500000  
5,1,7537.613636  
5,1,11109.671875  
5,1,3362.348837  
5,1,9757.813725  
5,1,4130.164894  
5,1,5184.891304  
5,1,4723.246094  
5,1,1697.733333  
5,1,3899.145349  
5,1,6397.219828  
5,1,3008.650000  
5,1,2207.450000  
5,1,4835.093750  
5,1,7367.916667  
5,1,2330.000000  
5,1,2786.139706  
5,1,10013.887500  
5,1,2208.826531  
5,1,1659.068750  
5,1,4365.840909  
5,1,13883.766892  
5,1,10029.255556

5,1,1520.625000  
5,1,15394.204545  
5,1,3315.371951  
5,1,6956.911585  
5,1,6697.615196  
5,1,11594.191667  
5,1,2982.923913  
5,1,11461.000000  
5,1,4063.500000  
5,1,4734.235714  
5,1,5958.134146  
5,1,5706.647059  
5,1,2569.193182  
5,1,1677.434783  
5,1,1822.718750  
5,1,2819.021277  
5,1,1627.387500  
5,1,3636.157500  
5,1,2439.437500  
5,1,8297.054054  
5,1,2631.355469  
5,1,5107.850000  
5,1,4666.565972  
5,1,2451.900000  
5,1,3099.903846  
5,1,2309.268293  
5,1,3433.225000  
5,1,3880.600000  
5,1,2824.194444  
5,1,2013.197917  
5,1,3396.951220  
5,1,2066.566667  
5,1,17377.250000  
5,1,1947.250000  
5,1,5032.104167  
5,1,5304.080000  
5,1,2174.930556  
5,1,1674.351064  
5,1,11364.461538  
5,1,3933.500000  
5,1,6823.769231  
5,1,14273.717949  
5,1,3402.090278  
5,1,2504.730769  
5,1,2265.658537  
5,1,5898.775641  
5,1,8078.667683  
5,1,1509.750000  
5,1,2696.895000  
5,1,2022.914286  
5,1,4807.243902  
5,1,3368.250000  
5,1,3765.128378  
5,1,4713.855263  
5,1,8832.350000  
5,1,1600.500000  
5,1,12958.403846  
5,1,2773.550000  
5,1,2273.953947  
5,1,4257.310345  
5,1,5489.134615  
5,1,3844.980000  
5,1,2070.711538  
5,1,7761.372093  
5,1,1604.136719  
5,1,8486.116279

5,1,1734.914474  
5,1,16332.674419  
5,1,1739.318182  
5,1,3586.477273  
5,1,17726.000000  
5,1,6812.099359  
5,1,9420.519886  
5,1,5929.782258  
5,1,3379.800000  
5,1,2354.639205  
5,1,3914.732955  
5,1,9404.307692  
5,1,3026.500000  
5,1,2027.794643  
5,1,14556.426630  
5,1,1553.952381  
5,1,8653.521429  
5,1,18226.888889  
5,1,6417.433333  
5,1,2678.522727  
5,1,2554.453125  
5,1,6353.950000  
5,1,3504.729839  
5,1,5315.477564  
5,1,3282.325000  
5,1,1830.539773  
5,1,1738.843750  
5,1,4228.733333  
5,1,5213.440476  
5,1,6031.439024  
5,1,4448.494186  
5,1,3466.564024  
5,1,2779.411243  
5,1,4007.411932  
5,1,1984.692308  
5,1,2402.048780  
5,1,2470.603448  
5,1,18259.250000  
5,1,3512.357955  
5,1,3366.509804  
5,1,13654.569767  
5,1,5873.409722  
5,1,1546.562500  
5,1,1711.551136  
5,1,2861.497159  
5,1,1700.513889  
5,1,3759.725000  
5,1,3142.610294  
5,1,2223.292614  
5,1,2050.500000  
5,1,1888.131579  
5,1,3671.276596  
5,1,2479.401786  
5,1,1656.381098  
5,1,5269.228261  
5,1,2585.829268  
5,1,1657.833333  
5,1,2474.116279  
5,1,12331.679487  
5,1,10951.422872  
5,1,2060.375000  
5,1,3523.909091  
5,1,4765.881250  
5,1,1507.277027  
5,1,3129.475610  
5,1,3920.618056

5,1,1955.704082  
5,1,2376.734375  
5,1,3615.777174  
5,1,1593.592262  
5,1,9686.026119  
5,1,1685.532609  
5,1,1756.046512  
5,1,1893.609756  
5,1,3850.382979  
5,1,3242.061170  
5,1,2544.646875  
5,1,2637.146875  
5,1,5211.743421  
5,1,5282.312500  
5,1,3247.375000  
5,1,1993.667500  
5,1,9172.994318  
5,1,2912.697581  
5,1,2331.614286  
5,1,3086.628571  
5,1,3555.655556  
5,1,2927.109589  
5,1,4015.084821  
5,1,1988.750000  
5,1,2035.250000  
5,1,2773.034574  
5,1,1506.922222  
5,1,1975.619048  
5,1,1551.327206  
5,1,2168.181818  
5,1,2349.450000  
5,1,4738.512500  
5,1,1503.250000  
5,1,4251.803571  
5,1,8490.657143  
5,1,2477.211538  
5,1,1716.250000  
5,1,1876.869565  
5,1,1821.908333  
5,1,3750.019737  
5,1,3165.629032  
5,1,3831.250000  
5,1,8061.454545  
5,1,3147.296053  
5,1,1699.476974  
5,1,3027.181818  
5,1,7347.984375  
5,1,5036.064516  
5,1,1940.375000  
5,1,19079.773256  
5,1,1626.575000  
5,1,9324.864865  
5,1,3251.090625  
5,1,1527.550000  
5,1,2372.907895  
5,1,1697.738971  
5,1,6436.326772  
5,1,7539.903409  
5,1,2767.261364  
5,1,1909.750000  
5,1,3584.161765  
5,1,2956.861413  
5,1,1675.857143  
5,1,1698.881944  
5,1,2770.255208  
5,1,3493.763889

5,1,6116.777778  
5,1,7429.179688  
5,1,15950.520270  
5,1,3254.122093  
5,1,6555.125000  
5,1,13674.500000  
5,1,2309.848684  
5,1,2192.912500  
5,1,2335.728659  
5,1,16580.213542  
5,1,1838.695122  
5,1,3545.028125  
5,1,3226.337500  
5,1,2792.000000  
5,1,3863.400000  
5,1,2935.750000  
5,1,1893.363636  
5,1,5048.875000  
5,1,6267.241071  
5,1,12189.683333  
5,1,4060.755000  
5,1,4171.117647  
5,1,6744.531250  
5,1,4995.214286  
5,1,5623.671875  
5,1,10063.000000  
5,1,1524.708333  
5,1,9929.804348  
5,1,17961.409091  
5,1,1573.377551  
5,1,6028.198370  
5,1,2746.227273  
5,1,9969.800000  
5,1,5382.476190  
5,1,5396.138889  
5,1,1660.466667  
5,1,11579.514286  
5,1,11714.825000  
5,1,1583.316176  
5,1,4171.000000  
5,1,5934.151163  
5,1,7292.531250  
5,1,5466.976744  
5,1,1879.386364  
5,1,1615.357143  
5,1,3234.286585  
5,1,2578.536290  
5,1,2121.162791  
5,1,11824.829268  
5,1,2310.491071  
5,1,2106.216667  
5,1,4410.420455  
5,1,2176.200000  
5,1,4380.431250  
5,1,2955.965517  
5,1,4783.759146  
5,1,3312.773438  
5,1,3780.780000  
5,1,1511.325581  
5,1,2661.780488  
5,1,1835.658654  
5,1,6119.530488  
5,1,3884.000000  
5,1,3128.437500  
5,1,4527.370833  
5,1,2135.972973

5,1,3987.060976  
5,1,2758.526316  
5,1,1674.725000  
5,1,2248.540816  
5,1,1596.865385  
5,1,1960.062500  
5,1,6219.444444  
5,1,2205.625000  
5,1,2611.278409  
5,1,14998.916667  
5,1,1735.139423  
5,1,3160.112903  
5,1,3839.196809  
5,1,1687.350000  
5,1,3842.034091  
5,1,1523.686047  
5,1,2081.893293  
5,1,6516.213235  
5,1,1536.143868  
5,1,7740.470833  
5,1,5653.101351  
5,1,1531.333333  
5,1,2026.474359  
5,1,4784.666667  
5,1,4190.037879  
5,1,13805.917969  
5,1,3115.341667  
5,1,4460.413462  
5,1,4211.000000  
5,1,2085.166667  
5,1,1663.740625  
5,1,7456.886364  
5,1,2693.606452  
5,1,5360.835664  
5,1,2373.325000  
5,1,3063.352941  
5,1,3524.077778  
5,1,1977.137500  
5,1,3787.527027  
5,1,1875.150000  
5,1,1595.207447  
5,1,3296.833333  
5,1,7663.612500  
5,1,14174.303571  
5,1,3445.263514  
5,1,2639.057692  
5,1,2246.695652  
5,1,7792.887500  
5,1,3561.934896  
5,1,2854.625000  
5,1,4743.949219  
5,1,2067.941176  
5,1,17215.781977  
5,1,6655.616667  
5,1,2013.456522  
5,1,1733.781250  
5,1,2522.653646  
5,1,2214.000000  
5,1,1639.966667  
5,1,1970.490000  
5,1,4383.467391  
5,1,5985.181250  
5,1,10832.638158  
5,1,3790.189103  
5,1,3875.676630  
5,1,3856.609756

5,1,2808.562500  
5,1,3249.360577  
5,1,1500.462963  
5,1,5118.738372  
5,1,2050.050000  
5,1,3352.390625  
5,1,2493.361842  
5,1,6203.791667  
5,1,3550.476744  
5,1,2624.663265  
5,1,5099.931818  
5,1,9798.527778  
5,1,8517.078125  
5,1,1882.880682  
5,1,3829.411585  
5,1,3732.588816  
5,1,5794.200000  
5,1,2138.666667  
5,1,3940.692073  
5,1,4408.317935  
5,1,6381.125000  
5,1,3375.513158  
5,1,5228.591667  
5,1,1528.500000  
5,1,2193.480769  
5,1,1974.950000  
5,1,2378.335714  
5,1,3365.277439  
5,1,5116.903846  
5,1,2368.892857  
5,1,1533.325000  
5,1,3892.192308  
5,1,6794.119318  
5,1,2761.708333  
5,1,6814.000000  
5,1,2493.295455  
5,1,1596.500000  
5,1,3096.972973  
5,1,14474.000000  
5,1,6861.865854  
5,1,4997.869048  
5,1,3430.046512  
5,1,3524.176471  
5,1,1828.079268  
5,1,2090.570312  
5,1,7050.146277  
5,1,4288.156250  
5,1,1713.483696  
5,1,1594.900000  
5,1,2276.125000  
5,1,2342.115385  
5,1,4140.051282  
5,1,5997.666667  
5,1,13695.536585  
5,1,9617.777778  
5,1,6604.642857  
5,1,1969.952381  
5,1,4138.279167  
5,1,13868.750000  
5,1,3901.814394  
5,1,3844.122024  
5,1,3444.703947  
5,1,2190.828571  
5,1,3815.520833  
5,1,1558.267442  
5,1,1692.362500

5,1,2619.945312  
5,1,3471.159091  
5,1,7556.447222  
5,1,1788.685315  
5,1,1855.291667  
5,1,13659.460714  
5,1,2784.860465  
5,1,7244.160714  
5,1,2994.647727  
5,1,2685.890244  
5,1,2526.589286  
5,1,11961.000000  
5,1,9035.564024  
5,1,16507.995968  
5,1,3686.021739  
5,1,2038.000000  
5,1,1525.633333  
5,1,2184.200000  
5,1,7637.500000  
5,1,5632.236979  
5,1,15340.472222  
5,1,10109.588816  
5,1,2187.834375  
5,1,4469.656977  
5,1,1857.000000  
5,1,2896.491071  
5,1,2634.257143  
5,1,8680.085106  
5,1,1597.125000  
5,1,2563.927083  
5,1,2392.418605  
5,1,1823.760870  
5,1,9393.038168  
5,1,3150.953804  
5,1,5772.340625  
5,1,1553.012195  
5,1,11690.664773  
5,1,2545.083333  
5,1,5149.816327  
5,1,1839.860294  
5,1,2050.422222  
5,1,18595.738372  
5,1,2748.250000  
5,1,7161.181818  
5,1,2369.390244  
5,1,3703.583333  
5,1,7229.071429  
5,1,5988.687500  
5,1,1534.012195  
5,1,15465.173077  
5,1,2087.992647  
5,1,1736.641447  
5,1,1997.030303  
5,1,9589.750000  
5,1,4358.675000  
5,1,2164.431548  
5,1,6438.467742  
5,1,10399.668919  
5,1,2097.922619  
5,1,2378.928571  
5,1,18660.650641  
5,1,2751.250000  
5,1,3276.343750  
5,1,3572.948864  
5,1,2579.250000  
5,1,1588.500000

5,1,2884.419355  
5,1,1755.052632  
5,1,8099.490132  
5,1,3119.535156  
5,1,2137.391304  
5,1,9290.593750  
5,1,4662.500000  
5,1,5223.771277  
5,1,2207.555556  
5,1,5348.692308  
5,1,6447.000000  
5,1,7979.229167  
5,1,9554.481481  
5,1,2292.750000  
5,1,4624.423077  
5,1,4010.798077  
5,1,5134.471154  
5,1,4289.049419  
5,1,11539.833333  
5,1,1861.918919  
5,1,1756.333333  
5,1,3112.779605  
5,1,10749.406250  
5,1,2992.214286  
5,1,4385.121324  
5,1,11041.026316  
5,1,6921.393750  
5,1,5115.255814  
5,1,2300.500000  
5,1,4447.378788  
5,1,1948.411765  
5,1,5250.794118  
5,1,5129.012195  
5,1,7266.774194  
5,1,6889.372093  
5,1,1702.750000  
5,1,2057.195946  
5,1,1781.285714  
5,1,1887.808333  
5,1,9377.474490  
5,1,2464.033333  
5,1,1849.486111  
5,1,3332.277344  
5,1,3516.168919  
5,1,3103.636364  
5,1,1867.730263  
5,1,1916.950000  
5,1,2032.400000  
5,1,3048.102273  
5,1,1666.150000  
5,1,3354.137500  
5,1,6406.022727  
5,1,9614.600000  
5,1,1908.453125  
5,1,3385.252033  
5,1,3558.210938  
5,1,1620.662500  
5,1,1530.250000  
5,1,3382.500000  
5,1,5466.625000  
5,1,2859.411290  
5,1,8761.166667  
5,1,6330.388158  
5,1,2900.752778  
5,1,2026.217391  
5,1,1981.310811

5,1,8987.669643  
5,1,1904.425000  
5,1,2364.941667  
5,1,3331.000000  
5,1,8178.100694  
5,1,4501.050676  
5,1,1598.437500  
5,1,3335.806548  
5,1,1960.707317  
5,1,1881.713415  
5,1,5089.058824  
5,1,2208.928030  
5,1,4331.130682  
5,1,2273.564189  
5,1,9297.888514  
5,1,5581.323864  
5,1,1740.864865  
5,1,3610.050000  
5,1,1747.060000  
5,1,5429.258065  
5,1,5027.156250  
5,1,1531.060811  
5,1,18920.953125  
5,1,12522.545455  
5,1,4015.142045  
5,1,2464.104167  
5,1,1760.162162  
5,1,2507.590909  
5,1,3664.789474  
5,1,5232.968085  
5,1,1761.147727  
5,1,9009.025000  
5,1,2835.742347  
5,1,4491.725000  
5,1,1539.737500  
5,1,7125.229167  
5,1,2053.961111  
5,1,1635.978125  
5,1,2353.642857  
5,1,10764.480469  
5,1,15419.840909  
5,1,1560.967105  
5,1,10703.811224  
5,1,2108.378378  
5,1,1647.191176  
5,1,10078.331081  
5,1,7944.821429  
5,1,2150.215625  
5,1,11246.352941  
5,1,5049.439024  
5,1,1818.636364  
5,1,7402.481707  
5,1,11417.091912  
5,1,2370.351064  
5,1,3483.486111  
5,1,2164.157407  
5,1,4974.875000  
5,1,4493.707386  
5,1,4335.750000  
5,1,1609.111111  
5,1,1883.500000  
5,1,4719.717949  
5,1,19654.388514  
5,1,3328.502976  
5,1,1585.000000  
5,1,4019.121951

5,1,1639.721591  
5,1,7350.238636  
5,1,1752.710526  
5,1,1722.180233  
5,1,5073.715116  
5,1,3438.122093  
5,1,12469.485714  
5,1,2559.918919  
5,1,6210.996622  
5,1,4379.000000  
5,1,5999.114286  
5,1,5195.204082  
5,1,2255.180233  
5,1,5218.015152  
5,1,5368.250000  
5,1,2012.170139  
5,1,1700.548387  
5,1,9274.555921  
5,1,3281.920213  
5,1,2456.231061  
5,1,3938.093023  
5,1,1577.956633  
5,1,2177.191489  
5,1,4917.550000  
5,1,7224.925781  
5,1,5716.220930  
5,1,4466.833333  
5,1,12022.277778  
5,1,2867.882212  
5,1,7836.432692  
5,1,5606.580645  
5,1,1988.752976  
5,1,3139.083333  
5,1,2634.989583  
5,1,12539.971774  
5,1,1722.102564  
5,1,6001.777174  
5,1,2001.359375  
5,1,4735.438953  
5,1,13384.041667  
5,1,2175.166667  
5,1,1559.717949  
5,1,5415.242925  
5,1,4485.250000  
5,1,6882.346154  
5,1,1592.250000  
5,1,3331.250000  
5,1,8397.367188  
5,1,2413.515625  
5,1,2709.511628  
5,1,19519.954082  
5,1,2429.554348  
5,1,6229.635870  
5,1,2171.312500  
5,1,1975.070000  
5,1,4954.750000  
5,1,9147.264706  
5,1,18155.259868  
5,1,9099.229167  
5,1,2326.213415  
5,1,18476.642857  
5,1,5530.750000  
5,1,1962.767442  
5,1,15122.500000  
5,1,1851.484043  
5,1,2471.347826

5,1,2309.490625  
5,1,2965.625000  
5,1,1864.630208  
5,1,3412.267857  
5,1,2073.675000  
5,1,5293.625000  
5,1,3022.689516  
5,1,11144.145349  
5,1,7902.073864  
5,1,10679.326531  
5,1,2783.519231  
5,1,1886.357143  
5,1,1780.643229  
5,1,6483.369565  
5,1,5497.734375  
5,1,5090.545455  
5,1,15535.511364  
5,1,9416.559375  
5,1,2260.770270  
5,1,3604.666667  
5,1,7147.630814  
5,1,4991.956250  
5,1,1652.312500  
5,1,3386.481707  
5,1,2379.551020  
5,1,2929.726190  
5,1,3213.533654  
5,1,5256.384868  
5,1,1582.850000  
5,1,2466.286184  
5,1,6356.513298  
5,1,3020.109756  
5,1,6000.601562  
5,1,1764.790541  
5,1,18563.581395  
5,1,2690.786184  
5,1,14411.875000  
5,1,2909.733696  
5,1,1931.048611  
5,1,1548.446429  
5,1,6851.218750  
5,1,1538.408163  
5,1,1551.895833  
5,1,2009.766447  
5,1,3331.769231  
5,1,18928.294118  
5,1,2789.724359  
5,1,6936.455882  
5,1,8070.366667  
5,1,1523.683824  
5,1,13577.856707  
5,1,5883.357143  
5,1,11883.313830  
5,1,2023.350694  
5,1,17109.953125  
5,1,2284.892045  
5,1,9712.073171  
5,1,1528.030303  
5,1,9412.682143  
5,1,2338.509615  
5,1,3219.918919  
5,1,6761.979167  
5,1,10859.880556  
5,1,1905.856383  
5,1,1844.054054  
5,1,11872.288889

5,1,8410.935484  
5,1,2169.609756  
5,1,8039.190476  
5,1,4676.200000  
5,1,4643.337500  
5,1,4546.670213  
5,1,9161.299020  
5,1,11204.135135  
5,1,3181.244318  
5,1,2005.297297  
5,1,2488.607143  
5,1,8918.421429  
5,1,1675.500000  
5,1,1860.085106  
5,1,4663.570652  
5,1,1675.510135  
5,1,3023.348039  
5,1,4984.395349  
5,1,5308.130435  
5,1,2319.463542  
5,1,4237.505682  
5,1,1955.878049  
5,1,1736.579545  
5,1,2111.358974  
5,1,3999.250000  
5,1,10522.071078  
5,1,2071.478723  
5,1,9625.430921  
5,1,17035.812500  
5,1,2269.039062  
5,1,1569.051471  
5,1,4712.610465  
5,1,5274.666667  
5,1,1639.460000  
5,1,1734.310484  
5,1,14233.312500  
5,1,4593.640625  
5,1,12079.500000  
5,1,3557.720000  
5,1,4051.446875  
5,1,2266.062500  
5,1,2198.068182  
5,1,3334.000000  
5,1,4224.951613  
5,1,3532.017045  
5,1,6978.317935  
5,1,6927.496875  
5,1,4880.771429  
5,1,1881.676471  
5,1,3671.250000  
5,1,2285.890957  
5,1,1781.944767  
5,1,4577.475000  
5,1,6328.714286  
5,1,11972.891892  
5,1,2465.615385  
5,1,1582.917683  
5,1,1561.211538  
5,1,3242.833333  
5,1,3014.559783  
5,1,16181.725000  
5,1,8562.893750  
5,1,2747.633721  
5,1,2088.578125  
5,1,6923.615385  
5,1,4039.738372

5,1,1747.954545  
5,1,6370.467742  
5,1,1510.865854  
5,1,3343.760000  
5,1,3366.803571  
5,1,1808.488636  
5,1,1761.156250  
5,1,1932.684211  
5,1,6626.723404  
5,1,5837.225000  
5,1,7733.544118  
5,1,2250.868421  
5,1,2276.328125  
5,1,1974.045455  
5,1,1730.388889  
5,1,12138.533088  
5,1,2360.037500  
5,1,10674.944149  
5,1,6464.135417  
5,1,3849.425676  
5,1,15877.812500  
5,1,2610.823529  
5,1,6749.803150  
5,1,4989.729592  
5,1,1601.967391  
5,1,2277.395349  
5,1,3249.411290  
5,1,5610.292763  
5,1,3712.988889  
5,1,5031.406250  
5,1,16469.910714  
5,1,1812.708333  
5,1,2352.590116  
5,1,1890.621622  
5,1,2166.227273  
5,1,3677.338542  
5,1,4956.737500  
5,1,7015.681452  
5,1,1509.836207  
5,1,6166.060606  
5,1,9509.795455  
5,1,3921.614130  
5,1,6525.887931  
5,1,1902.317073  
5,1,6239.664894  
5,1,7428.319149  
5,1,2754.683140  
5,1,2360.077844  
5,1,4686.872283  
5,1,8017.392857  
5,1,8943.573171  
5,1,4999.950000  
5,1,2608.512500  
5,1,7437.956522  
5,1,1500.647727  
5,1,13135.581395  
5,1,2520.279070  
5,1,2082.218750  
5,1,3211.445312  
5,1,1863.333333  
5,1,1650.604167  
5,1,3381.368243  
5,1,5656.265625  
5,1,4438.344595  
5,1,2939.880000  
5,1,4271.875000

5,1,1737.886364  
5,1,2190.687500  
5,1,11335.527344  
5,1,8402.422222  
5,1,1830.450000  
5,1,1500.222222  
5,1,4052.520000  
5,1,4511.375000  
5,1,5515.442500  
5,1,3468.336538  
5,1,2035.560127  
5,1,1750.000000  
5,1,3438.814286  
5,1,18025.520270  
5,1,5722.937500  
5,1,6851.125000  
5,1,1586.521277  
5,1,1562.526316  
5,1,2304.293750  
5,1,7421.616477  
5,1,6049.589844  
5,1,3390.650000  
5,1,7199.964286  
5,1,14098.201389  
5,1,1946.861842  
5,1,3279.127660  
5,1,2774.375000  
5,1,6129.388889  
5,1,8239.750000  
5,1,1683.217949  
5,1,7396.906915  
5,1,2358.757576  
5,1,15830.926829  
5,1,2727.736842  
5,1,8612.720930  
5,1,6705.541667  
5,1,6502.451220  
5,1,9711.825658  
5,1,2649.963636  
5,1,5427.812500  
5,1,3452.661111  
5,1,2102.720930  
5,1,7746.812500  
5,1,11366.266667  
5,1,18316.430556  
5,1,14040.148438  
5,1,2482.808511  
5,1,4356.386364  
5,1,7637.627907  
5,1,1538.333333  
5,1,9105.112500  
5,1,3852.388889  
5,1,2460.756579  
5,1,3359.335366  
5,1,2280.000000  
5,1,1782.182927  
5,1,3243.664634  
5,1,6502.170157  
5,1,2272.871212  
5,1,3761.337209  
5,1,2316.419355  
5,1,1526.375000  
5,1,4256.324324  
5,1,3497.209559  
5,1,1786.750000  
5,1,1841.433594

5,1,1745.494792  
5,1,4748.686047  
5,1,1617.954545  
5,1,4031.934659  
5,1,2005.564394  
5,1,2163.137500  
5,1,2296.350000  
5,1,1509.242187  
5,1,3392.250000  
5,1,4056.988372  
5,1,6956.411765  
5,1,1868.517857  
5,1,3884.400000  
5,1,2687.279070  
5,1,5119.482143  
5,1,3516.468750  
5,1,1581.800000  
5,1,17231.081897  
5,1,2238.968750  
5,1,9673.135417  
5,1,2886.007353  
5,1,3246.333333  
5,1,16741.562500  
5,1,14739.625000  
5,1,2103.260870  
5,1,2649.809783  
5,1,3472.009434  
5,1,2962.113095  
5,1,5840.250000  
5,1,1535.688953  
5,1,12209.044444  
5,1,2744.266304  
5,1,3406.202381  
5,1,4189.320312  
5,1,2148.157895  
5,1,2218.569853  
5,1,3476.990625  
5,1,2285.051136  
5,1,16225.308511  
5,1,2045.446429  
5,1,5942.642857  
5,1,1990.273649  
5,1,14842.072368  
5,1,2951.643293  
5,1,7705.543478  
5,1,18005.178571  
5,1,4136.381250  
5,1,4765.000000  
5,1,1993.110119  
5,1,4517.750000  
5,1,1998.400000  
5,1,4232.806818  
5,1,2562.147727  
5,1,5163.000000  
5,1,2167.294118  
5,1,1976.535714  
5,1,3757.648438  
5,1,6776.011905  
5,1,3229.250000  
5,1,1585.987500  
5,1,1651.933333  
5,1,3670.539062  
5,1,3122.125000  
5,1,1859.785714  
5,1,5787.750000  
5,1,2611.051136

5,1,2862.625000  
5,1,2959.491279  
5,1,2686.243902  
5,1,7039.073529  
5,1,4373.312500  
5,1,1911.534483  
5,1,1962.470588  
5,1,19772.353659  
5,1,1780.117647  
5,1,1663.640152  
5,1,1856.277778  
5,1,2791.753289  
5,1,12325.140625  
5,1,8762.096591  
5,1,7746.473404  
5,1,2858.032895  
5,1,5028.360795  
5,1,3686.250000  
5,1,3553.218750  
5,1,2835.300000  
5,1,1956.239130  
5,1,14706.949219  
5,1,7483.075000  
5,1,3207.559211  
5,1,14513.500000  
5,1,2107.000000  
5,1,1541.832237  
5,1,1514.802326  
5,1,3586.155556  
5,1,3349.291667  
5,1,1810.221591  
5,1,4651.041667  
5,1,6187.750000  
5,1,5169.429487  
5,1,5241.500000  
5,1,2389.223214  
5,1,11336.215517  
5,1,1648.320946  
5,1,1578.552147  
5,1,2027.000000  
5,1,5075.269737  
5,1,1948.375000  
5,1,6131.232759  
5,1,1729.635870  
5,1,15110.202703  
5,1,4203.583333  
5,1,1815.069079  
5,1,6283.895349  
5,1,2970.768293  
5,1,1681.143382  
5,1,1511.219512  
5,1,3554.071023  
5,1,4353.973684  
5,1,4956.840909  
5,1,2480.437500  
5,1,8825.277778  
5,1,2247.940000  
5,1,4899.834239  
5,1,6101.271341  
5,1,3289.766667  
5,1,1710.170732  
5,1,3662.000000  
5,1,7256.055556  
5,1,2387.356383  
5,1,18016.619318  
5,1,1983.871429

5,1,3967.611111  
5,1,5935.745000  
5,1,2237.733129  
5,1,1566.827128  
5,1,10233.975000  
5,1,7802.868421  
5,1,3313.583333  
5,1,2320.010000  
5,1,2295.641026  
5,1,2844.880952  
5,1,5133.410714  
5,1,5743.431818  
5,1,2989.032258  
5,1,6008.573864  
5,1,11676.216667  
5,1,2702.812500  
5,1,9481.389706  
5,1,6291.692308  
5,1,1597.550676  
5,1,5350.060811  
5,1,2667.230263  
5,1,4128.581081  
5,1,18138.432432  
5,1,7150.064024  
5,1,2187.111111  
5,1,2871.417683  
5,1,2188.369898  
5,1,1828.205128  
5,1,7012.750000  
5,1,15381.722222  
5,1,4054.718750  
5,1,2963.964286  
5,1,4527.573718  
5,1,2282.250000  
5,1,2489.222222  
5,1,3477.714286  
5,1,6953.952381  
5,1,2279.238095  
5,1,13425.325000  
5,1,12356.654762  
5,1,2244.272727  
5,1,1688.393750  
5,1,1930.399457  
5,1,2460.551020  
5,1,3767.205357  
5,1,17147.736111  
5,1,8222.000000  
5,1,4300.269231  
5,1,2115.767442  
5,1,8152.329545  
5,1,2791.562500  
5,1,1617.172222  
5,1,1686.051282  
5,1,5448.488372  
5,1,10067.227564  
5,1,16635.392045  
5,1,3325.610294  
5,1,4013.454545  
5,1,2536.759615  
5,1,1650.244681  
5,1,2298.406250  
5,1,2497.195122  
5,1,6414.477941  
5,1,1549.772727  
5,1,1616.400000  
5,1,3950.375000

5,1,2018.571429  
5,1,17719.672619  
5,1,3802.381944  
5,1,3802.514706  
5,1,3593.903226  
5,1,6341.088816  
5,1,2773.651042  
5,1,1971.238095  
5,1,4850.243902  
5,1,3570.941176  
5,1,4926.375000  
5,1,2199.335664  
5,1,10931.062500  
5,1,3037.281250  
5,1,5984.708333  
5,1,2108.307692  
5,1,11105.804878  
5,1,4597.000000  
5,1,9142.756757  
5,1,10900.043478  
5,1,2738.734756  
5,1,3784.578431  
5,1,7125.967857  
5,1,9675.161184  
5,1,2857.701220  
5,1,1536.260870  
5,1,2674.738095  
5,1,1657.494737  
5,1,4440.804688  
5,1,4485.567568  
5,1,2181.193182  
5,1,2063.250000  
5,1,4808.022222  
5,1,2279.662879  
5,1,2935.142857  
5,1,1573.189189  
5,1,3151.000000  
5,1,4970.206522  
5,1,1639.300000  
5,1,2989.312500  
5,1,4121.695652  
5,1,5312.315217  
5,1,12763.700000  
5,1,1564.416667  
5,1,3398.015957  
5,1,2777.741279  
5,1,15970.511628  
5,1,12468.140244  
5,1,4024.346591  
5,1,12790.903846  
5,1,1601.704082  
5,1,4388.125000  
5,1,4167.683824  
5,1,6378.175676  
5,1,7385.500000  
5,1,2068.822674  
5,1,3032.978723  
5,1,1614.735465  
5,1,1661.865385  
5,1,3217.297872  
5,1,2329.226190  
5,1,3468.467391  
5,1,3467.163462  
5,1,2688.728261  
5,1,1678.115385  
5,1,8043.870000

5,1,5366.957237  
5,1,2730.975610  
5,1,2279.781250  
5,1,2633.232143  
5,1,6093.562500  
5,1,3424.851744  
5,1,9651.614865  
5,1,2556.437500  
5,1,1919.312500  
5,1,5883.701389  
5,1,1776.922619  
5,1,4071.409091  
5,1,2297.317073  
5,1,1587.112069  
5,1,3420.243902  
5,1,2336.223404  
5,1,5763.692308  
5,1,5267.455882  
5,1,1974.738095  
5,1,6820.818182  
5,1,3915.545455  
5,1,4352.575000  
5,1,5483.902439  
5,1,1945.750000  
5,1,1676.134615  
5,1,19886.079861  
5,1,2620.304348  
5,1,6379.855263  
5,1,1715.972222  
5,1,9880.279891  
5,1,4131.602941  
5,1,2887.377551  
5,1,1940.013889  
5,1,1829.035714  
5,1,2431.941176  
5,1,3210.321429  
5,1,2449.709677  
5,1,1691.164474  
5,1,2484.488372  
5,1,2294.459459  
5,1,1905.230978  
5,1,2793.412500  
5,1,5091.209677  
5,1,3809.195122  
5,1,8696.685811  
5,1,15526.846591  
5,1,3980.825000  
5,1,4220.082386  
5,1,2583.484848  
5,1,2463.235000  
5,1,11054.882353  
5,1,3644.538462  
5,1,2957.461957  
5,1,2556.687500  
5,1,1703.913043  
5,1,3233.138889  
5,1,2731.064885  
5,1,2624.744898  
5,1,3790.112500  
5,1,4604.750000  
5,1,2816.919355  
5,1,2592.192308  
5,1,7094.646341  
5,1,1917.302632  
5,1,3436.741667  
5,1,4124.315789

5,1,1855.869565  
5,1,2214.252660  
5,1,4790.333333  
5,1,4789.515244  
5,1,4266.462838  
5,1,2511.615385  
5,1,3258.674479  
5,1,1514.531250  
5,1,4713.967949  
5,1,10289.578571  
5,1,1601.450000  
5,1,5174.638158  
5,1,6109.130556  
5,1,2569.467742  
5,1,4286.841463  
5,1,2155.794643  
5,1,2002.540000  
5,1,1624.713415  
5,1,7247.756098  
5,1,8686.300000  
5,1,9808.791667  
5,1,1544.114865  
5,1,1525.871429  
5,1,2448.727273  
5,1,7370.250000  
5,1,1839.848837  
5,1,2378.419355  
5,1,2411.040625  
5,1,8239.648936  
5,1,2034.158163  
5,1,5631.427778  
5,1,2908.335526  
5,1,2561.394231  
5,1,1857.590909  
5,1,5235.934375  
5,1,5496.398437  
5,1,2400.878676  
5,1,1836.562500  
5,1,4073.415541  
5,1,1957.132143  
5,1,7232.307692  
5,1,6930.485795  
5,1,1864.443750  
5,1,4082.175000  
5,1,5134.718750  
5,1,10847.000000  
5,1,10150.420455  
5,1,4245.325000  
5,1,5205.901786  
5,1,3142.820513  
5,1,5435.937500  
5,1,3941.132812  
5,1,3596.478261  
5,1,2062.000000  
5,1,4154.888158  
5,1,2128.204545  
5,1,2463.177885  
5,1,2526.900000  
5,1,3171.429688  
5,1,7895.254310  
5,1,1875.460227  
5,1,2615.722973  
5,1,8840.863971  
5,1,1953.590909  
5,1,1678.730263  
5,1,2308.044444

5,1,8739.119048  
5,1,2138.473684  
5,1,3009.807947  
5,1,2301.229651  
5,1,4956.500000  
5,1,3124.975610  
5,1,1514.389706  
5,1,2371.792308  
5,1,4363.372159  
5,1,3796.375839  
5,1,3203.223684  
5,1,4271.250000  
5,1,4118.053571  
5,1,6746.088710  
5,1,5772.714744  
5,1,11259.405063  
5,1,2551.375000  
5,1,12394.961310  
5,1,11384.597826  
5,1,4189.647059  
5,1,5733.791667  
5,1,2317.717105  
5,1,2355.070652  
5,1,1599.406250  
5,1,2603.000000  
5,1,1553.553571  
5,1,6794.156250  
5,1,1875.400000  
5,1,4819.145270  
5,1,2263.618750  
5,1,1853.394231  
5,1,14632.869565  
5,1,4699.746622  
5,1,5056.250000  
5,1,3527.500000  
5,1,2907.559211  
5,1,1604.470588  
5,1,3905.355556  
5,1,1545.785714  
5,1,1746.565789  
5,1,2382.536184  
5,1,3109.828488  
5,1,5551.670732  
5,1,1651.883929  
5,1,2308.811111  
5,1,2058.688776  
5,1,6121.000000  
5,1,2083.358974  
5,1,5457.967262  
5,1,1686.244792  
5,1,18528.401316  
5,1,17045.386364  
5,1,5451.469388  
5,1,2895.803922  
5,1,3593.000000  
5,1,5053.863636  
5,1,6763.493902  
5,1,6820.865854  
5,1,3425.458333  
5,1,3179.755556  
5,1,4076.388889  
5,1,1543.166667  
5,1,1944.036290  
5,1,7753.156250  
5,1,6397.327381  
5,1,2668.358852

5,1,9805.581395  
5,1,1906.875000  
5,1,2832.853659  
5,1,2355.454545  
5,1,1679.321429  
5,1,1669.982143  
5,1,12002.164773  
5,1,7523.776786  
5,1,3613.878049  
5,1,3292.892442  
5,1,1536.558140  
5,1,13089.337500  
5,1,13251.000000  
5,1,3267.977273  
5,1,2329.972826  
5,1,2557.283784  
5,1,3614.813776  
5,1,11750.476351  
5,1,2659.020833  
5,1,4216.772959  
5,1,7027.507812  
5,1,1682.000000  
5,1,1546.361111  
5,1,3685.438202  
5,1,1867.116667  
5,1,3473.044872  
5,1,12468.545455  
5,1,10042.055556  
5,1,2262.226190  
5,1,3020.392241  
5,1,4236.850000  
5,1,1908.816327  
5,1,1552.765244  
5,1,3027.065217  
5,1,2364.377907  
5,1,4111.688889  
5,1,4764.500000  
5,1,5788.035714  
5,1,1610.861413  
5,1,18289.180000  
5,1,4670.855114  
5,1,1777.948980  
5,1,6445.727273  
5,1,2304.400000  
5,1,10861.529412  
5,1,3010.516304  
5,1,15516.721154  
5,1,1736.173077  
5,1,4918.393617  
5,1,15227.154412  
5,1,16741.058824  
5,1,2525.444444  
5,1,4090.526786  
5,1,2877.170139  
5,1,1968.486842  
5,1,1972.216837  
5,1,4032.048077  
5,1,3623.819892  
5,1,1678.631579  
5,1,4492.363636  
5,1,3177.594595  
5,1,7191.903061  
5,1,3094.615385  
5,1,2829.331250  
5,1,6411.442708  
5,1,1573.585938

5,1,8572.412946  
5,1,13541.666667  
5,1,1745.690476  
5,1,2675.811224  
5,1,1946.850000  
5,1,3252.573171  
5,1,2638.451220  
5,1,3589.976562  
5,1,1896.758721  
5,1,3160.400000  
5,1,8723.818182  
5,1,8144.510870  
5,1,2763.050000  
5,1,6699.950521  
5,1,11741.272059  
5,1,2060.415441  
5,1,5207.910000  
5,1,1652.676136  
5,1,3372.736111  
5,1,12955.611111  
5,1,5696.083333  
5,1,5878.440104  
5,1,1649.937500  
5,1,3911.166667  
5,1,2183.779070  
5,1,5263.242857  
5,1,2781.000000  
5,1,9180.937500  
5,1,14392.537791  
5,1,2366.250000  
5,1,10517.669753  
5,1,2701.125000  
5,1,2269.790698  
5,1,1950.847826  
5,1,8934.476190  
5,1,7469.140306  
5,1,1929.207386  
5,1,3726.344828  
5,1,2119.148649  
5,1,7276.786290  
5,1,13132.000000  
5,1,3064.607759  
5,1,7541.978723  
5,1,4417.284091  
5,1,2825.523256  
5,1,1533.392857  
5,1,1987.219512  
5,1,4754.714286  
5,1,1706.100000  
5,1,1889.166667  
5,1,2821.602941  
5,1,1774.152174  
5,1,1863.541667  
5,1,1893.689189  
5,1,1553.943750  
5,1,4887.590517  
5,1,5928.398148  
5,1,2533.439024  
5,1,10438.166667  
5,1,6618.290698  
5,1,2542.976562  
5,1,3988.593750  
5,1,2129.529762  
5,1,13479.941667  
5,1,2631.461538  
5,1,2554.301887

5,1,1794.394022  
5,1,3726.948864  
5,1,4180.963889  
5,1,2898.676471  
5,1,6662.297297  
5,1,14238.600694  
5,1,1910.142857  
5,1,1767.273649  
5,1,1592.437500  
5,1,4662.150000  
5,1,1591.410326  
5,1,6352.939024  
5,1,5029.525000  
5,1,4166.201923  
5,1,4668.354167  
5,1,1788.562500  
5,1,10138.192308  
5,1,1509.054487  
5,1,1889.017361  
5,1,13793.231250  
5,1,1857.657143  
5,1,18881.206250  
5,1,2523.500000  
5,1,2188.271429  
5,1,6393.170732  
5,1,1568.531250  
5,1,8169.476744  
5,1,5112.807692  
5,1,2947.661290  
5,1,3076.886364  
5,1,1541.409091  
5,1,6680.468750  
5,1,2229.802083  
5,1,1724.250000  
5,1,2124.960366  
5,1,2166.954545  
5,1,5225.263158  
5,1,3015.580882  
5,1,8402.673469  
5,1,6076.576705  
5,1,4937.875000  
5,1,2624.928125  
5,1,2997.500000  
5,1,6459.100000  
5,1,4464.465278  
5,1,5357.592105  
5,1,8928.704167  
5,1,3376.548780  
5,1,5127.423611  
5,1,7712.413793  
5,1,4926.138889  
5,1,3238.571429  
5,1,1698.409091  
5,1,2497.720588  
5,1,3764.377907  
5,1,3743.900000  
5,1,1865.489362  
5,1,1938.962500  
5,1,3733.783088  
5,1,2650.314103  
5,1,2337.660714  
5,1,14819.250000  
5,1,4800.053571  
5,1,2064.000000  
5,1,5258.643617  
5,1,9245.657143

5,1,1575.490132  
5,1,3909.733333  
5,1,12017.785714  
5,1,3872.087500  
5,1,17996.839286  
5,1,2008.063830  
5,1,1815.250000  
5,1,2485.107143  
5,1,4218.959459  
5,1,2037.928571  
5,1,3046.866667  
5,1,8928.562500  
5,1,2139.937500  
5,1,9651.521429  
5,1,3392.614286  
5,1,10022.677083  
5,1,11453.589286  
5,1,1982.508333  
5,1,2507.902439  
5,1,3773.235294  
5,1,1528.349265  
5,1,2407.216912  
5,1,4129.062500  
5,1,2331.934524  
5,1,4070.815476  
5,1,3528.944079  
5,1,8355.711111  
5,1,5007.292683  
5,1,3488.311111  
5,1,6879.011719  
5,1,10362.133333  
5,1,17257.710526  
5,1,9883.469697  
5,1,11360.037879  
5,1,3837.230114  
5,1,2662.946429  
5,1,13377.475000  
5,1,2202.790323  
5,1,4399.327778  
5,1,18875.888889  
5,1,17903.453947  
5,1,2254.250000  
5,1,2895.275000  
5,1,4755.446809  
5,1,14291.092105  
5,1,6837.168750  
5,1,1701.339806  
5,1,1638.207386  
5,1,9950.843750  
5,1,3532.005882  
5,1,11396.676020  
5,1,5289.888889  
5,1,4206.295455  
5,1,2772.971429  
5,1,6950.025000  
5,1,2658.869792  
5,1,6035.231481  
5,1,11762.763780  
5,1,3383.062500  
5,1,1562.843750  
5,1,1938.200000  
5,1,2917.821429  
5,1,1673.330357  
5,1,11377.930921  
5,1,4965.338235  
5,1,7395.369048

5,1,4445.916667  
5,1,3836.468085  
5,1,3474.210227  
5,1,14151.430556  
5,1,2296.953488  
5,1,4607.750000  
5,1,1965.697674  
5,1,9653.941176  
5,1,8095.320000  
5,1,3563.539474  
5,1,4693.953125  
5,1,2053.263158  
5,1,9003.192308  
5,1,3497.350543  
5,1,3918.537500  
5,1,6881.225694  
5,1,12803.810811  
5,1,1997.169118  
5,1,5200.494898  
5,1,1585.095745  
5,1,1695.217593  
5,1,1503.610465  
5,1,1804.485294  
5,1,5383.441176  
5,1,12247.488372  
5,1,8775.273438  
5,1,5480.599432  
5,1,18662.875000  
5,1,3139.569307  
5,1,9888.171053  
5,1,6989.267857  
5,1,2117.557692  
5,1,1591.781250  
5,1,1993.272727  
5,1,4401.881579  
5,1,10538.500000  
5,1,8816.041667  
5,1,7666.214286  
5,1,6039.140625  
5,1,2470.000000  
5,1,2630.291667  
5,1,17624.142857  
5,1,2344.767857  
5,1,2020.595395  
5,1,1626.839286  
5,1,6946.441176  
5,1,5058.704787  
5,1,5359.984375  
5,1,1856.776163  
5,1,2678.744186  
5,1,3129.125000  
5,1,2299.696429  
5,1,2297.132353  
5,1,7928.250000  
5,1,4936.888889  
5,1,2424.139535  
5,1,14927.187500  
5,1,1522.559783  
5,1,4893.712766  
5,1,1690.531250  
5,1,4962.442308  
5,1,1925.262195  
5,1,4956.038462  
5,1,1720.044271  
5,1,4189.057377  
5,1,8504.960526

5,1,6754.586207  
5,1,19784.587209  
5,1,5266.435811  
5,1,3418.796053  
5,1,2941.682692  
5,1,5637.734043  
5,1,2310.139535  
5,1,19991.453125  
5,1,15552.375000  
5,1,2809.285714  
5,1,3609.551471  
5,1,3774.520161  
5,1,2131.781250  
5,1,3262.350000  
5,1,3602.850000  
5,1,2192.031250  
5,1,11635.837838  
5,1,10813.080000  
5,1,1796.420455  
5,1,1770.131579  
5,1,3001.267857  
5,1,3796.800000  
5,1,3014.079545  
5,1,4123.435714  
5,1,1566.178571  
5,1,1539.432927  
5,1,9932.697368  
5,1,12491.812500  
5,1,3438.576923  
5,1,1891.437500  
5,1,2015.750000  
5,1,5256.611842  
5,1,11179.510870  
5,1,3368.575758  
5,1,9257.265957  
5,1,2183.125000  
5,1,4343.039634  
5,1,9639.669118  
5,1,1792.781250  
5,1,3193.990385  
5,1,2083.727941  
5,1,2322.515152  
5,1,2104.425532  
5,1,18246.189394  
5,1,2241.250000  
5,1,2147.550898  
5,1,3808.419118  
5,1,1569.444444  
5,1,4428.178030  
5,1,9203.789474  
5,1,19131.222222  
5,1,3378.593750  
6,2,2839.760000  
6,2,11924.240196  
6,2,4640.619792  
6,2,1515.750000  
6,2,1978.090909  
6,2,1675.218750  
6,2,1788.369110  
6,2,2559.013514  
6,2,2137.588235  
6,2,5126.041667  
6,2,5166.406250  
6,2,2194.040625  
6,2,3665.386792  
6,2,2274.078947

6,2,1519.241071  
6,2,3401.541667  
6,2,1746.182927  
6,2,3046.783654  
6,2,1714.562500  
6,2,3480.607143  
6,2,2528.625000  
6,2,1895.861842  
6,2,2088.152174  
6,2,6029.178571  
6,2,5598.135417  
6,2,2414.265000  
6,2,2332.572368  
6,2,4380.718750  
6,2,3069.377358  
6,2,2608.393519  
6,2,1713.357843  
6,2,5021.326923  
6,2,1706.314655  
6,2,2910.440104  
6,2,7064.273438  
6,2,2004.034091  
6,2,3136.620283  
6,2,2844.312500  
6,2,1794.912500  
6,2,2653.455882  
6,2,2588.274510  
6,2,2046.634615  
6,2,1595.080882  
6,2,2537.591463  
6,2,1546.303977  
6,2,2032.614865  
6,2,1511.267045  
6,2,3841.757143  
6,2,2907.660714  
6,2,3226.383929  
6,2,1584.235714  
6,2,2927.946023  
6,2,2973.388587  
6,2,1641.286458  
6,2,1637.550000  
6,2,2143.586538  
6,2,2546.375000  
6,2,1747.277174  
6,2,1804.435185  
6,2,3364.957386  
6,2,2725.586957  
6,2,1602.252841  
6,2,1946.406250  
6,2,1942.827381  
6,2,1673.507246  
6,2,2536.278846  
6,2,1534.984043  
6,2,1651.397222  
6,2,2278.000000  
6,2,2205.539063  
6,2,2930.103448  
6,2,2595.925532  
6,2,4517.647059  
6,2,5134.816667  
6,2,3317.627907  
6,2,2463.530055  
6,2,1551.645161  
6,2,2689.375000  
6,2,1569.880319  
6,2,4698.363281

6,2,1617.747596  
6,2,1576.077128  
6,2,1589.637195  
6,2,1607.937500  
6,2,12797.723404  
6,2,1653.860465  
6,2,2378.648810  
6,2,1594.600000  
6,2,1506.000000  
6,2,2237.480000  
6,2,1732.301020  
6,2,1723.008621  
6,2,1771.962209  
6,2,2083.658654  
6,2,3130.168367  
6,2,2148.857558  
6,2,2033.387097  
6,2,6993.266667  
6,2,1559.301471  
6,2,3082.079545  
6,2,1623.579268  
6,2,3326.752717  
6,2,3484.478261  
6,2,1750.125000  
6,2,1507.953947  
6,2,1951.437500  
6,2,1655.934524  
6,2,1877.146739  
6,2,5188.840426  
6,2,2438.914634  
6,2,3006.441176  
6,2,1990.208333  
6,2,11717.867647  
6,2,3498.263158  
6,2,1786.900000  
6,2,1879.938636  
6,2,1536.734043  
6,2,1609.065217  
6,2,2378.948276  
6,2,3755.100962  
6,2,2097.377660  
6,2,4022.234375  
6,2,2433.718750  
6,2,4101.761905  
6,2,1572.026961  
6,2,1836.147959  
6,2,1794.395000  
6,2,2406.279762  
6,2,1677.837766  
6,2,2718.142857  
6,2,2973.750000  
6,2,11914.757353  
6,2,2182.486979  
6,2,2895.581250  
6,2,3162.312500  
6,2,1837.345238  
6,2,3584.517857  
6,2,1810.395349  
6,2,1636.534483  
6,2,6497.411017  
6,2,5534.000000  
6,2,1603.656250  
6,2,2368.914634  
6,2,2268.962500  
6,2,1971.558140  
6,2,1807.131944

6,2,1611.977941  
6,2,2016.357143  
6,2,7493.172794  
6,2,2980.337209  
6,2,4241.155405  
6,2,11436.291667  
6,2,2415.820652  
6,2,2810.495536  
6,2,5330.691176  
6,2,2904.500000  
6,2,2057.884375  
6,2,2334.369565  
6,2,2618.689189  
6,2,3259.972222  
6,2,4125.500000  
6,2,2542.780488  
6,2,2347.934524  
6,2,2942.244681  
6,2,4921.160000  
6,2,1612.919643  
6,2,2705.583333  
6,2,1907.572500  
6,2,1608.849057  
6,2,2222.075472  
6,2,2718.096154  
6,2,1898.070000  
6,2,5392.469512  
6,2,2207.198529  
6,2,2821.225610  
6,2,1735.875000  
6,2,1640.864865  
6,2,4875.358333  
6,2,1779.571429  
6,2,2116.580000  
6,2,2186.810811  
6,2,1719.445513  
6,2,1883.636029  
6,2,1834.212766  
6,2,1661.813725  
6,2,3629.480978  
6,2,2048.596875  
6,2,1952.205357  
6,2,1835.848214  
6,2,2185.543605  
6,2,1542.641026  
6,2,3123.220588  
6,2,2542.860119  
6,2,4471.375000  
6,2,2347.000000  
6,2,1552.237805  
6,2,1707.846154  
6,2,1521.440789  
6,2,1706.011628  
6,2,2133.454545  
6,2,1692.269737  
6,2,2018.437500  
6,2,2239.067308  
6,2,1885.736842  
6,2,1679.458333  
6,2,5261.377976  
6,2,1626.098684  
6,2,2263.218750  
6,2,2753.302885  
6,2,2083.781250  
6,2,3313.862745  
6,2,5582.588542

6,2,1717.126316  
6,2,1912.492925  
6,2,3198.800000  
6,2,2651.281863  
6,2,1802.304348  
6,2,2367.558824  
6,2,1652.000000  
6,2,2096.363636  
6,2,1879.593085  
6,2,3107.899038  
6,2,1887.540000  
6,2,1900.294643  
6,2,2107.585000  
6,2,1608.891447  
6,2,1638.677632  
6,2,1872.809524  
6,2,4564.230556  
6,2,8696.878788  
6,2,3078.038462  
6,2,1657.265244  
6,2,1536.106250  
6,2,3617.676471  
6,2,2305.241279  
6,2,14654.808140  
6,2,2185.190217  
6,2,1978.222500  
6,2,3055.410714  
6,2,2484.622159  
6,2,6882.787234  
6,2,5708.040984  
6,2,2510.361702  
6,2,2160.108974  
6,2,2723.127404  
6,2,1687.958904  
6,2,2026.532609  
6,2,1740.567708  
6,2,2578.475000  
6,2,1605.734043  
6,2,3529.755000  
6,2,2085.161765  
6,2,1620.216346  
6,2,2387.309322  
6,2,1570.588235  
6,2,1623.852500  
6,2,1612.805233  
6,2,2238.632353  
6,2,2378.403846  
6,2,4956.756944  
6,2,6117.389706  
6,2,1593.910256  
6,2,6849.797872  
6,2,1745.542553  
6,2,2125.226852  
6,2,2980.415094  
6,2,1608.231250  
6,2,5947.077381  
6,2,6292.980603  
6,2,9524.848214  
6,2,1512.552632  
6,2,1649.578947  
6,2,1790.955357  
6,2,2080.680147  
6,2,2754.390000  
6,2,1663.312500  
6,2,1636.107784  
6,2,2108.666667

6,2,1504.329545  
6,2,2034.700000  
6,2,1995.622642  
6,2,1831.722222  
6,2,5398.935897  
6,2,2023.076087  
6,2,2599.411364  
6,2,1863.891892  
6,2,1763.625000  
6,2,1666.696875  
6,2,10065.357143  
6,2,1977.061047  
6,2,1763.931818  
6,2,4000.335000  
6,2,1839.000000  
6,2,2890.750000  
6,2,2616.362705  
6,2,1609.551020  
6,2,3512.093023  
6,2,2339.872093  
6,2,2186.793478  
6,2,1542.514706  
6,2,2595.190217  
6,2,1544.281250  
6,2,2312.486111  
6,2,2651.750000  
6,2,2026.450000  
6,2,1935.096154  
6,2,1710.489130  
6,2,1787.875000  
6,2,1513.975610  
6,2,2801.570312  
6,2,2240.516304  
6,2,2093.738636  
6,2,2026.625000  
6,2,2619.465116  
6,2,1887.725490  
6,2,2376.607143  
6,2,2009.180233  
6,2,4427.016667  
6,2,2193.947674  
6,2,2871.706731  
6,2,3819.714286  
6,2,3689.625000  
6,2,1686.867347  
6,2,1839.604167  
6,2,19333.098485  
6,2,3207.365741  
6,2,2829.308511  
6,2,2299.967890  
6,2,3439.261364  
6,2,2422.368056  
6,2,2501.521739  
6,2,1876.833333  
6,2,2106.792553  
6,2,1908.489796  
6,2,2424.361702  
6,2,2591.953125  
6,2,19421.803571  
6,2,1800.799020  
6,2,1872.955882  
6,2,8939.266026  
6,2,2249.764535  
6,2,2262.485849  
6,2,1732.058824  
6,2,2275.950000

6,2,3188.072917  
6,2,2032.058824  
6,2,1811.560976  
6,2,1800.275000  
6,2,2753.904070  
6,2,1979.767857  
6,2,5021.490909  
6,2,3000.728261  
6,2,2054.109375  
6,2,1983.859375  
6,2,1898.028061  
6,2,3604.273936  
6,2,1521.617647  
6,2,1533.641304  
6,2,1544.922222  
6,2,3135.948864  
6,2,4370.850000  
6,2,2024.837838  
6,2,2115.000000  
6,2,1685.726744  
6,2,1714.691667  
6,2,2420.236842  
6,2,3032.774510  
6,2,1501.658854  
6,2,3944.336207  
6,2,4467.276596  
6,2,2094.166667  
6,2,1827.000000  
6,2,4293.067568  
6,2,2472.215686  
6,2,1922.684211  
6,2,1799.187500  
6,2,1524.037234  
6,2,12711.142857  
6,2,2078.500000  
6,2,1566.313830  
6,2,2211.327778  
6,2,1694.786458  
6,2,8045.655000  
6,2,1550.645000  
6,2,2271.069767  
6,2,5375.256250  
6,2,1541.978723  
6,2,2164.461538  
6,2,1757.233173  
6,2,3995.609467  
6,2,7253.687500  
6,2,1729.528061  
6,2,2974.250000  
6,2,2826.125000  
6,2,1515.500000  
6,2,1935.087209  
6,2,1755.564024  
6,2,1855.252717  
6,2,1583.061111  
6,2,2267.365385  
6,2,1667.080645  
6,2,1636.497717  
6,2,1502.843023  
6,2,3385.047619  
6,2,1507.512500  
6,2,2056.263889  
6,2,1701.219388  
6,2,2660.101064  
6,2,1624.698529  
6,2,3919.174528

6,2,3052.925532  
6,2,2595.553030  
6,2,2329.500000  
6,2,4416.687500  
6,2,1638.848214  
6,2,3625.761574  
6,2,3640.639423  
6,2,4739.163462  
6,2,2362.410000  
6,2,1606.808140  
6,2,1651.438776  
6,2,1703.000000  
6,2,2352.825000  
6,2,1658.797753  
6,2,2733.333333  
6,2,3467.028061  
6,2,1520.235294  
6,2,2518.346591  
6,2,1771.244898  
6,2,4885.728448  
6,2,1576.120283  
6,2,2396.375000  
6,2,1779.156250  
6,2,2636.721875  
6,2,1521.897959  
6,2,1979.268868  
6,2,1950.000000  
6,2,4348.919118  
6,2,2351.140625  
6,2,2160.767857  
6,2,1805.045918  
6,2,8494.480000  
6,2,2001.381696  
6,2,3378.836066  
6,2,1816.634146  
6,2,1933.894231  
6,2,1501.692308  
6,2,3337.212500  
6,2,2694.267442  
6,2,1527.250000  
6,2,1599.814815  
6,2,12766.443878  
6,2,5419.527174  
6,2,2207.468085  
6,2,1627.054054  
6,2,1619.937500  
6,2,2070.985000  
6,2,1681.177632  
6,2,2639.009259  
6,2,1976.978723  
6,2,2001.020408  
6,2,2258.500000  
6,2,2300.060000  
6,2,11682.256579  
6,2,2212.288462  
6,2,2611.079268  
6,2,2352.425000  
6,2,2201.250000  
6,2,3943.728261  
6,2,1901.926471  
6,2,1739.402439  
6,2,2054.941489  
6,2,1721.212500  
6,2,9378.917969  
6,2,2081.500000  
6,2,1965.300000

6,2,1975.872396  
6,2,1567.710938  
6,2,1944.566489  
6,2,4444.782609  
6,2,2428.337500  
6,2,1938.438356  
6,2,2126.215909  
6,2,3818.678571  
6,2,1506.500000  
6,2,1846.178571  
6,2,3850.275510  
6,2,1933.312500  
6,2,3199.625000  
6,2,1990.946429  
6,2,2618.228723  
6,2,1597.279070  
6,2,1697.797619  
6,2,1790.622807  
6,2,2656.068966  
6,2,2982.175000  
6,2,1714.500000  
6,2,2115.820122  
6,2,2037.545918  
6,2,1690.152439  
6,2,3273.892157  
6,2,3748.992500  
6,2,1680.665816  
6,2,1512.394737  
6,2,3642.805804  
6,2,4438.008621  
6,2,4003.431373  
6,2,1696.844595  
6,2,9603.354651  
6,2,1938.597500  
6,2,2051.957447  
6,2,1617.234043  
6,2,1940.000000  
6,2,2631.807692  
6,2,3459.631818  
6,2,1675.112245  
6,2,2187.300000  
6,2,2059.142157  
6,2,5253.077206  
6,2,1502.505102  
6,2,1927.339286  
6,2,14168.450000  
6,2,3270.041237  
6,2,2612.981771  
6,2,1986.188679  
6,2,1652.977273  
6,2,3423.000000  
6,2,2227.316327  
6,2,2219.362179  
6,2,2657.886905  
6,2,2266.326531  
6,2,1678.644444  
6,2,2078.666667  
6,2,1579.443396  
6,2,1923.085106  
6,2,1795.732143  
6,2,2175.132979  
6,2,1731.398936  
6,2,2932.926471  
6,2,4163.154018  
6,2,2441.500000  
6,2,2433.492187

6,2,1772.556122  
6,2,1731.634615  
6,2,1752.742021  
6,2,1513.250000  
6,2,2419.133333  
6,2,1575.375000  
6,2,1729.553571  
6,2,6138.083333  
6,2,3418.718750  
6,2,2418.475000  
6,2,1662.382979  
6,2,1633.550802  
6,2,1772.361111  
6,2,1757.645833  
6,2,2484.906250  
6,2,1875.268519  
6,2,2912.187500  
6,2,2282.860577  
6,2,1679.835526  
6,2,4236.428571  
6,2,1504.607143  
6,2,2790.578947  
6,2,1566.656250  
6,2,2363.250000  
6,2,3049.424107  
6,2,1802.116071  
6,2,2840.096154  
6,2,2722.185976  
6,2,2559.412234  
6,2,1604.437500  
6,2,2797.123404  
6,2,1747.507353  
6,2,3072.375000  
6,2,1688.888889  
6,2,1669.781977  
6,2,2702.510000  
6,2,1967.140625  
6,2,2394.782051  
6,2,2557.787234  
6,2,1737.808673  
6,2,2658.000000  
6,2,2173.004902  
6,2,2202.735849  
6,2,1983.790698  
6,2,2108.915789  
6,2,3733.814815  
6,2,4481.437500  
6,2,1600.875000  
6,2,3815.954545  
6,2,3675.723404  
6,2,1978.961538  
6,2,1564.692708  
6,2,1842.404762  
6,2,3495.019737  
6,2,1722.654255  
6,2,1852.662500  
6,2,3315.781250  
6,2,1591.357500  
6,2,2111.453488  
6,2,3982.000000  
6,2,1961.159375  
6,2,4612.777344  
6,2,3548.226562  
6,2,1618.611702  
6,2,1773.625000  
6,2,3672.500000

6,2,2596.237981  
6,2,3779.500000  
6,2,4998.067308  
6,2,1991.408163  
6,2,1533.474490  
6,2,2758.677885  
6,2,1531.877660  
6,2,2102.102273  
6,2,3303.937500  
6,2,1821.075000  
6,2,1571.897959  
6,2,1922.495536  
6,2,1774.500000  
6,2,2106.742857  
6,2,2812.660000  
6,2,8668.175595  
6,2,2314.581395  
6,2,1999.357143  
6,2,2449.500000  
6,2,2065.907895  
6,2,1719.000000  
6,2,1697.918605  
6,2,3048.691176  
6,2,10764.632653  
6,2,1745.204787  
6,2,2401.486301  
6,2,2390.232143  
6,2,2056.076389  
6,2,1979.743056  
6,2,1536.500000  
6,2,1776.823980  
6,2,1693.596154  
6,2,3142.921053  
6,2,3141.382812  
6,2,2132.130952  
6,2,3315.527174  
6,2,2625.800000  
6,2,2315.730263  
6,2,2024.088816  
6,2,2345.650000  
6,2,2383.554054  
6,2,2849.541667  
6,2,3735.737245  
6,2,1827.156250  
6,2,1814.600000  
6,2,1857.824324  
6,2,1754.500000  
6,2,3057.348404  
6,2,1512.367347  
6,2,2291.544503  
6,2,2436.393617  
6,2,3805.790000  
6,2,3549.646341  
6,2,3558.245192  
6,2,1955.450581  
6,2,2973.957447  
6,2,1622.390244  
6,2,16803.817708  
6,2,2715.175000  
6,2,2936.416667  
6,2,1633.800595  
6,2,2621.845745  
6,2,2271.755556  
6,2,1822.562500  
6,2,6290.772727  
6,2,3554.470930

6,2,2828.980769  
6,2,1909.171196  
6,2,3223.983871  
6,2,1725.147059  
6,2,2721.065000  
6,2,3908.048780  
6,2,2102.927500  
6,2,1815.290000  
6,2,1509.448864  
6,2,1824.890625  
6,2,9123.807692  
6,2,1815.750000  
6,2,1685.750000  
6,2,1823.193750  
6,2,2478.053977  
6,2,1562.072500  
6,2,3764.222561  
6,2,6250.145833  
6,2,1876.593750  
6,2,2173.337500  
6,2,2045.192568  
6,2,1663.024590  
6,2,1800.866279  
6,2,2559.707447  
6,2,2748.765244  
6,2,7519.925532  
6,2,5407.173913  
6,2,2252.636792  
6,2,2535.500000  
6,2,3212.732558  
6,2,4011.895408  
6,2,2337.958333  
6,2,11136.915625  
6,2,2785.196023  
6,2,1897.513514  
6,2,3052.661765  
6,2,1638.918367  
6,2,1886.064103  
6,2,3363.162736  
6,2,1500.695755  
6,2,5485.695312  
6,2,1883.330882  
6,2,1906.054688  
6,2,2258.517442  
6,2,1866.800000  
6,2,1804.673077  
6,2,2675.526596  
6,2,1674.402174  
6,2,4598.097902  
6,2,2799.297872  
6,2,1992.500000  
6,2,2243.960526  
6,2,2723.406250  
6,2,2622.752604  
6,2,1751.293478  
6,2,2658.500000  
6,2,4611.150000  
6,2,2619.700000  
6,2,1615.691489  
6,2,6330.970395  
6,2,1696.029255  
6,2,1574.045918  
6,2,3451.538043  
6,2,1989.000000  
6,2,1708.833333  
6,2,11622.048611

6,2,2620.863095  
6,2,1798.080189  
6,2,1701.090000  
6,2,2553.306452  
6,2,2728.868056  
6,2,1794.288462  
6,2,1686.439024  
6,2,1982.628571  
6,2,2251.470930  
6,2,1852.333333  
6,2,1559.250000  
6,2,2192.877778  
6,2,2821.723404  
6,2,2452.902778  
6,2,1726.189024  
6,2,3728.593750  
6,2,1709.675676  
6,2,4391.750000  
6,2,2056.211454  
6,2,1648.673913  
6,2,1897.528846  
6,2,2457.500000  
6,2,1743.725000  
6,2,2834.944186  
6,2,6046.057692  
6,2,3229.000000  
6,2,2796.937500  
6,2,1694.052885  
6,2,1808.502404  
6,2,2183.237745  
6,2,6729.891892  
6,2,1829.336364  
6,2,1985.797619  
6,2,2183.300532  
6,2,2520.790865  
6,2,6378.360000  
6,2,2440.039474  
6,2,1552.095588  
6,2,1505.505208  
6,2,2069.583333  
6,2,3508.057692  
6,2,3301.098214  
6,2,1576.862245  
6,2,1716.020270  
6,2,1849.783333  
6,2,1761.460000  
6,2,1628.143617  
6,2,2271.906250  
6,2,3093.116667  
6,2,2383.944444  
6,2,1664.902439  
6,2,1777.300613  
6,2,1800.770833  
6,2,2557.317708  
6,2,1562.355114  
6,2,3185.693878  
6,2,3396.734694  
6,2,3563.187500  
6,2,2110.272727  
6,2,1826.526786  
6,2,3098.473214  
6,2,3154.942857  
6,2,2028.220588  
6,2,1931.551630  
6,2,2249.000000  
6,2,1958.734756

6,2,1845.359375  
6,2,2477.778302  
6,2,1811.848958  
6,2,2516.519737  
6,2,2090.785714  
6,2,1942.632353  
6,2,3543.554167  
6,2,1870.432292  
6,2,1576.369186  
6,2,2191.735795  
6,2,2356.115385  
6,2,2518.382353  
6,2,1509.777778  
6,2,2011.044118  
6,2,2036.416667  
6,2,2367.025568  
6,2,1933.129808  
6,2,1715.800000  
6,2,2827.918182  
6,2,3528.611111  
6,2,1999.199074  
6,2,3868.458333  
6,2,1606.135417  
6,2,2516.166667  
6,2,1715.958333  
6,2,3533.706250  
6,2,3676.755682  
6,2,2904.500000  
6,2,5400.185976  
6,2,1598.760417  
6,2,3582.575000  
6,2,1533.397727  
6,2,1600.837209  
6,2,3242.148148  
6,2,7019.764706  
6,2,13152.755682  
6,2,2508.125000  
6,2,2364.105114  
6,2,3361.455882  
6,2,1684.380435  
6,2,2131.973404  
6,2,1815.430556  
6,2,1764.143750  
6,2,5845.947368  
6,2,3058.899590  
6,2,2757.339286  
6,2,1795.500000  
6,2,1702.425926  
6,2,4398.480978  
6,2,1959.090909  
6,2,4733.694444  
6,2,1579.383721  
6,2,1586.116071  
6,2,6375.762755  
6,2,1837.753049  
6,2,2062.861702  
6,2,2719.393617  
6,2,2664.675676  
6,2,5276.133333  
6,2,1539.566038  
6,2,2761.000000  
6,2,1549.274194  
6,2,1785.477941  
6,2,11957.357143  
6,2,1595.106383  
6,2,1715.375000

6,2,3766.651316  
6,2,2521.868056  
6,2,5734.023256  
6,2,1595.852941  
6,2,2194.159091  
6,2,1523.583333  
6,2,2085.531250  
6,2,1685.910714  
6,2,1745.240741  
6,2,1570.470297  
6,2,2085.554878  
6,2,3220.617347  
6,2,12571.875000  
6,2,1557.389205  
6,2,1705.628289  
6,2,1951.006410  
6,2,1570.454268  
6,2,2019.416667  
6,2,1911.132450  
6,2,2856.073770  
6,2,3964.914286  
6,2,2291.909375  
6,2,1515.159091  
6,2,2136.729167  
6,2,1773.000000  
6,2,6292.309211  
6,2,2157.640000  
6,2,2916.772436  
6,2,3331.691860  
6,2,3085.333333  
6,2,2291.425000  
6,2,2561.725490  
6,2,2199.472973  
6,2,3167.169811  
6,2,1532.122340  
6,2,2847.051471  
6,2,2653.717391  
6,2,1566.946429  
6,2,2081.894737  
6,2,1653.531250  
6,2,3646.469388  
6,2,1531.568452  
6,2,1859.489362  
6,2,2535.686275  
6,2,1526.531250  
6,2,2506.013514  
6,2,3245.656863  
6,2,4275.350000  
6,2,1516.437500  
6,2,1501.534375  
6,2,2106.846939  
6,2,1746.238839  
6,2,1527.250000  
6,2,2056.589744  
6,2,1978.200000  
6,2,1741.212766  
6,2,1815.250000  
6,2,1540.797222  
6,2,5337.393617  
6,2,1674.838542  
6,2,1586.543478  
6,2,6803.878906  
6,2,1532.852941  
6,2,3279.243421  
6,2,2506.343085  
6,2,2403.604167

6,2,1879.305851  
6,2,4107.963636  
6,2,1846.755435  
6,2,1724.780000  
6,2,1646.539216  
6,2,1679.325153  
6,2,1993.687500  
6,2,4078.559211  
6,2,2785.909574  
6,2,3293.341837  
6,2,5919.068182  
6,2,1721.735294  
6,2,1515.512195  
6,2,1515.401042  
6,2,3007.194444  
6,2,2018.408537  
6,2,2997.171875  
6,2,6640.193750  
6,2,1683.356707  
6,2,4158.941860  
6,2,2377.690341  
6,2,1789.020161  
6,2,1841.935000  
6,2,1912.500000  
6,2,1668.100543  
6,2,2073.882212  
6,2,2546.957317  
6,2,1846.367347  
6,2,1548.789474  
6,2,3358.640000  
6,2,2277.276596  
6,2,3853.496622  
6,2,1655.958333  
6,2,2291.403846  
6,2,2401.515625  
6,2,2111.622449  
6,2,1604.557927  
6,2,1751.000000  
6,2,2310.250000  
6,2,2715.394444  
6,2,1566.022901  
6,2,2550.455000  
6,2,2011.565217  
6,2,3993.244681  
6,2,1779.612500  
6,2,1599.790698  
6,2,1952.932870  
6,2,1512.353659  
6,2,3122.173913  
6,2,2206.761905  
6,2,1781.285714  
6,2,1528.169118  
6,2,2041.762500  
6,2,2413.056604  
6,2,1575.325581  
6,2,2986.770833  
6,2,1658.966667  
6,2,2847.383721  
6,2,3128.606250  
6,2,1614.666667  
6,2,1694.820000  
6,2,2327.602941  
6,2,1866.818627  
6,2,2400.187500  
6,2,3157.836957  
6,2,1667.361111

6,2,2201.285714  
6,2,1794.090000  
6,2,9246.108553  
6,2,2036.519737  
6,2,2582.703125  
6,2,1617.272727  
6,2,2224.246622  
6,2,2588.948864  
6,2,1963.000000  
6,2,2339.923077  
6,2,2903.725490  
6,2,2026.618421  
6,2,2047.714286  
6,2,3028.260638  
6,2,4588.651442  
6,2,2005.943182  
6,2,2476.170213  
6,2,2355.052885  
6,2,3524.343750  
6,2,2449.956522  
6,2,2701.670732  
6,2,1605.925000  
6,2,2103.045455  
6,2,4339.737179  
6,2,3097.301887  
6,2,6160.875000  
6,2,1775.760870  
6,2,3276.070652  
6,2,3125.456818  
6,2,1591.416667  
6,2,1882.479730  
6,2,6988.737805  
6,2,1627.400000  
6,2,3135.225000  
6,2,1632.010870  
6,2,2277.835227  
6,2,1810.823529  
6,2,1526.468750  
6,2,1556.975490  
6,2,2507.023936  
6,2,2334.617347  
6,2,2643.980392  
6,2,3835.398810  
6,2,2467.833333  
6,2,1765.674342  
6,2,1595.860000  
6,2,1961.476190  
6,2,3150.034884  
6,2,1852.116279  
6,2,5795.261792  
6,2,1672.976562  
6,2,9831.360000  
6,2,1731.836538  
6,2,2343.283019  
6,2,1611.345238  
6,2,2922.452128  
6,2,1608.664773  
6,2,1822.601064  
6,2,3138.415948  
6,2,2335.463889  
6,2,2324.413889  
6,2,2537.568878  
6,2,1544.012755  
6,2,1865.500000  
6,2,4507.386364  
6,2,4529.125000

6,2,1929.590909  
6,2,2889.934783  
6,2,7707.250000  
6,2,2563.815000  
6,2,2263.994186  
6,2,1634.612245  
6,2,1601.300000  
6,2,1637.646277  
6,2,2169.588235  
6,2,2461.285714  
6,2,2093.017045  
6,2,2379.215909  
6,2,3572.832317  
6,2,1983.209459  
6,2,2464.105769  
6,2,1877.206897  
6,2,3264.539773  
6,2,1739.935811  
6,2,6291.087209  
6,2,1519.777174  
6,2,2747.792553  
6,2,7226.331081  
6,2,1615.307065  
6,2,4709.960784  
6,2,1795.384615  
6,2,2492.500000  
6,2,2225.081081  
6,2,1933.856383  
6,2,2843.170833  
6,2,3096.076923  
6,2,1608.492347  
6,2,1925.281250  
6,2,1592.988095  
6,2,3004.366279  
6,2,1732.163265  
6,2,1872.273936  
6,2,1799.495614  
6,2,3056.569767  
6,2,2198.668103  
6,2,2449.742647  
6,2,1625.011364  
6,2,1619.843750  
6,2,1581.217105  
6,2,1594.916667  
6,2,1703.816327  
6,2,2020.265244  
6,2,1830.500000  
6,2,1716.372549  
6,2,1698.187500  
6,2,1524.429688  
6,2,4556.162162  
6,2,1683.125000  
6,2,2051.273438  
6,2,2598.121795  
6,2,3071.471983  
6,2,1619.726415  
6,2,5085.779412  
6,2,2030.973684  
6,2,19131.133721  
6,2,1725.750000  
6,2,1980.400000  
6,2,2020.595745  
6,2,11400.854730  
6,2,1620.359756  
6,2,11740.648649  
6,2,2584.717949

6,2,1759.798611  
6,2,1736.661765  
6,2,1785.033333  
6,2,1993.519231  
6,2,5470.511628  
6,2,2498.147436  
6,2,1573.415761  
6,2,1926.563636  
6,2,2487.974359  
6,2,2317.885638  
6,2,3977.194444  
6,2,3051.437500  
6,2,6143.877358  
6,2,3632.399038  
6,2,2793.784574  
6,2,2603.393750  
6,2,2088.805556  
6,2,8320.824519  
6,2,2523.250000  
6,2,4206.127907  
6,2,3059.061111  
6,2,1642.720588  
6,2,2918.967213  
6,2,3100.211957  
6,2,8902.083333  
6,2,2295.365625  
6,2,2460.815000  
6,2,2315.860000  
6,2,3733.981481  
6,2,2133.196429  
6,2,4883.800000  
6,2,3231.521739  
6,2,6269.644737  
6,2,2514.600000  
6,2,2089.823529  
6,2,1686.938953  
6,2,1558.458333  
6,2,3090.320000  
6,2,3142.881579  
6,2,2213.160714  
6,2,1687.425532  
6,2,6738.557692  
6,2,2322.458333  
6,2,1538.697115  
6,2,2040.519231  
6,2,3960.451613  
6,2,3090.396226  
6,2,3761.181818  
6,2,1573.559211  
6,2,1593.560417  
6,2,2468.262931  
6,2,2557.611511  
6,2,2115.425714  
6,2,4188.313953  
6,2,4013.027778  
6,2,1919.336735  
6,2,1499.775862  
6,2,1912.480769  
6,2,1790.157895  
6,2,8892.969512  
6,2,1618.577500  
6,2,2555.911765  
6,2,2388.106383  
6,2,2390.770349  
6,2,5573.875000  
6,2,8353.134804

6,2,2370.000000  
6,2,2573.315789  
6,2,1608.336957  
6,2,1541.837209  
6,2,5170.437500  
6,2,2456.859091  
6,2,2866.730769  
6,2,3056.232558  
6,2,1520.687500  
6,2,18538.190476  
6,2,2668.133152  
6,2,1928.176471  
6,2,2014.400000  
6,2,1537.012755  
6,2,2274.431373  
6,2,1612.243750  
6,2,2559.380814  
6,2,1506.625000  
6,2,2744.168919  
6,2,2504.101744  
6,2,3401.358553  
6,2,1690.384615  
6,2,1865.520833  
6,2,1584.810811  
6,2,1975.760479  
6,2,4373.709184  
6,2,1512.480769  
6,2,2502.430851  
6,2,2416.235294  
6,2,1740.477273  
6,2,3343.087209  
6,2,2722.220264  
6,2,1650.205128  
6,2,7210.330882  
6,2,2713.900000  
6,2,1934.851064  
6,2,3008.261905  
6,2,2143.110000  
6,2,3788.055556  
6,2,2905.618902  
6,2,2045.448980  
6,2,1563.941860  
6,2,1904.182292  
6,2,2688.071429  
6,2,2654.159091  
6,2,3185.780612  
6,2,3681.040909  
6,2,1881.589286  
6,2,1666.315789  
6,2,2314.453125  
6,2,3789.096774  
6,2,3368.263587  
6,2,2028.375000  
6,2,1786.938650  
6,2,2288.394737  
6,2,2093.600000  
6,2,1569.635870  
6,2,3032.668033  
6,2,2255.804348  
6,2,1779.230769  
6,2,2402.232955  
6,2,2659.244898  
6,2,1623.549479  
6,2,1596.743590  
6,2,1915.312500  
6,2,2362.335227

6,2,2631.622549  
6,2,12634.593750  
6,2,2543.617021  
6,2,1683.594512  
6,2,1735.840426  
6,2,2331.535714  
6,2,3225.718750  
6,2,3709.875000  
6,2,1770.562500  
6,2,1541.346154  
6,2,2494.375000  
6,2,4416.484375  
6,2,2105.029412  
6,2,1808.042683  
6,2,1572.226744  
6,2,3768.150862  
6,2,1686.435714  
6,2,2039.460106  
6,2,2051.612500  
6,2,6999.181818  
6,2,1680.016949  
6,2,1702.020833  
6,2,1929.855000  
6,2,2788.622449  
6,2,1760.083333  
6,2,2018.444444  
6,2,2418.272947  
6,2,1654.118421  
6,2,3109.266827  
6,2,1504.368421  
6,2,1799.021429  
6,2,1521.655556  
6,2,1609.772222  
6,2,1976.797872  
6,2,3127.532258  
6,2,1864.016509  
6,2,2595.750000  
6,2,2255.785714  
6,2,2378.367347  
6,2,4684.592391  
6,2,1628.343750  
6,2,1545.040698  
6,2,2640.658537  
6,2,1953.722826  
6,2,2005.470000  
6,2,2297.160714  
6,2,11802.043478  
6,2,1738.420455  
6,2,3808.591837  
6,2,2907.392361  
6,2,2433.154762  
6,2,2473.551136  
6,2,2130.247768  
6,2,1580.500000  
6,2,2268.447115  
6,2,4564.273256  
6,2,1973.212766  
6,2,2405.357843  
6,2,3167.950658  
6,2,1597.919444  
6,2,1617.763298  
6,2,1776.763298  
6,2,1662.725000  
6,2,2150.742021  
6,2,3266.838542  
6,2,1585.051630

6,2,3173.608108  
6,2,3011.139535  
6,2,1977.316860  
6,2,1662.744681  
6,2,3229.962500  
6,2,3003.482143  
6,2,5169.473171  
6,2,1752.437500  
6,2,2310.923077  
6,2,2049.000000  
6,2,1976.686170  
6,2,2399.658088  
6,2,2248.573864  
6,2,3842.395349  
6,2,5338.466912  
6,2,2059.492021  
6,2,1831.526596  
6,2,2362.581818  
6,2,1742.272727  
6,2,1894.656250  
6,2,2189.640957  
6,2,1648.494681  
6,2,1694.763158  
6,2,9712.352941  
6,2,2856.366071  
6,2,1544.026786  
6,2,2121.333333  
6,2,2894.182432  
6,2,2725.215116  
6,2,1781.532609  
6,2,1935.836111  
6,2,1626.321809  
6,2,3555.729167  
6,2,2329.803571  
6,2,2958.427419  
6,2,1954.000000  
6,2,1663.434211  
6,2,1991.355000  
6,2,1949.588235  
6,2,2515.304167  
6,2,4589.042553  
6,2,3077.952128  
6,2,3100.080882  
6,2,1919.829268  
6,2,2538.235294  
6,2,1611.446429  
6,2,1861.776316  
6,2,3874.097222  
6,2,1873.870455  
6,2,1639.444079  
6,2,1815.178082  
6,2,1586.246711  
6,2,1681.551724  
6,2,2054.958333  
6,2,6410.492647  
6,2,2149.225000  
6,2,3052.687500  
6,2,1635.125000  
6,2,3610.268293  
6,2,1856.278409  
6,2,1675.301136  
6,2,3062.889423  
6,2,3769.451923  
6,2,1575.549020  
6,2,3134.553191  
6,2,1743.314685

6,2,2696.666667  
6,2,3159.962264  
6,2,3401.791667  
6,2,9226.090909  
6,2,2328.980769  
6,2,1583.484375  
6,2,5826.359756  
6,2,16441.404412  
6,2,4289.801471  
6,2,2219.415698  
6,2,2564.589844  
6,2,2026.604790  
6,2,1691.869565  
6,2,3328.803922  
6,2,1904.402500  
6,2,1687.083333  
6,2,1887.642045  
6,2,3159.133333  
6,2,2730.675000  
6,2,1935.877551  
6,2,7163.378571  
6,2,2130.222222  
6,2,2200.459016  
6,2,2028.593750  
6,2,2939.292553  
6,2,2682.270833  
6,2,1500.475000  
6,2,3276.515957  
6,2,3521.768868  
6,2,2805.536765  
6,2,2545.151163  
6,2,2630.457447  
6,2,1686.368421  
6,2,1733.111111  
6,2,2032.973214  
6,2,4623.217105  
6,2,1585.336538  
6,2,2306.197368  
6,2,1974.500000  
6,2,1623.866667  
6,2,2762.935000  
6,2,5105.750000  
6,2,3018.237179  
6,2,2171.768750  
6,2,2651.891892  
6,2,1701.636364  
6,2,4201.951087  
6,2,5703.225806  
6,2,1626.540000  
6,2,1893.594828  
6,2,2032.947917  
6,2,2928.040000  
6,2,1512.913043  
6,2,2701.400000  
6,2,2036.200000  
6,2,2398.296512  
6,2,2126.765625  
6,2,2687.588235  
6,2,2001.687500  
6,2,2461.383152  
6,2,1535.265625  
6,2,4468.430556  
6,2,2747.540541  
6,2,2616.235294  
6,2,3381.066667  
6,2,4097.277174

6,2,1869.121951  
6,2,2465.058140  
6,2,1773.680804  
6,2,2191.468599  
6,2,1762.190217  
6,2,7176.034722  
6,2,3063.825000  
6,2,3146.818182  
6,2,6554.029762  
6,2,2206.649038  
6,2,1762.316860  
6,2,3677.362500  
6,2,1866.746094  
6,2,1504.551136  
6,2,2361.163462  
6,2,1576.278061  
6,2,2277.450000  
6,2,1609.281250  
6,2,3405.156250  
6,2,2524.159314  
6,2,1740.780488  
6,2,3626.622449  
6,2,1548.497500  
6,2,1897.950000  
6,2,1662.019231  
6,2,2147.515625  
6,2,2351.214286  
6,2,2822.645349  
6,2,6489.816176  
6,2,1589.742857  
6,2,9894.694767  
6,2,1600.472222  
6,2,2354.625000  
6,2,2592.427326  
6,2,3285.866803  
6,2,2569.400943  
6,2,6012.319149  
6,2,1991.476190  
6,2,1680.392157  
6,2,1559.073171  
6,2,3793.200000  
6,2,1679.489583  
6,2,10631.000000  
6,2,1913.382353  
6,2,5081.864130  
6,2,1752.571429  
6,2,1692.472222  
6,2,2038.193878  
6,2,1737.304545  
6,2,2281.578125  
6,2,2275.534574  
6,2,1608.953488  
6,2,3903.676923  
6,2,2287.163265  
6,2,3894.430233  
6,2,1769.604839  
6,2,1614.000000  
6,2,1599.716981  
6,2,2545.859375  
6,2,2891.235294  
6,2,3470.083333  
6,2,1640.754717  
6,2,1571.522727  
6,2,4955.551136  
6,2,4516.231383  
6,2,1623.370968

6,2,1804.697034  
6,2,2679.984925  
6,2,4023.555921  
6,2,2994.782609  
6,2,1650.202381  
6,2,1579.764706  
6,2,2916.714286  
6,2,2948.466667  
6,2,1740.814103  
6,2,2462.015306  
6,2,1691.010204  
6,2,1530.953125  
6,2,1769.093750  
6,2,1565.000000  
6,2,2166.915000  
6,2,2914.896875  
6,2,4492.795455  
6,2,5370.183673  
6,2,2406.597222  
6,2,1580.914894  
6,2,8332.777174  
6,2,2252.580357  
6,2,2190.095238  
6,2,1840.660000  
6,2,1779.500000  
6,2,2797.032967  
6,2,2272.812500  
6,2,2094.382653  
6,2,1640.005952  
6,2,1819.244318  
6,2,1541.000000  
6,2,4076.937500  
6,2,2264.683673  
6,2,2617.144444  
6,2,2422.625000  
6,2,2139.459559  
6,2,2258.653061  
6,2,2155.074074  
6,2,2451.050595  
6,2,5088.847826  
6,2,1910.291667  
6,2,2494.833333  
6,2,1597.264205  
6,2,5748.062500  
6,2,4684.497500  
6,2,2020.605769  
6,2,1577.282051  
6,2,1783.000000  
6,2,6167.573171  
6,2,1604.993902  
6,2,4269.714286  
6,2,5935.466837  
6,2,1738.137500  
6,2,2633.410088  
6,2,3624.627778  
6,2,2604.571023  
6,2,1986.018750  
6,2,6642.165323  
6,2,2991.100000  
6,2,1940.713068  
6,2,1674.392241  
6,2,2079.736842  
6,2,4521.144444  
6,2,2388.959052  
6,2,1840.000000  
6,2,2117.972973

6,2,2084.054054  
6,2,2077.597500  
6,2,1637.166667  
6,2,3019.333333  
6,2,2560.541667  
6,2,2174.000000  
6,2,2139.264881  
6,2,1778.953947  
6,2,1757.893293  
6,2,1718.727273  
6,2,2274.882812  
6,2,2135.277778  
6,2,1556.799242  
6,2,3062.075000  
6,2,8566.238095  
6,2,2239.895349  
6,2,1525.854911  
6,2,4131.117647  
6,2,4743.428571  
6,2,6088.738889  
6,2,2017.163462  
6,2,2643.614583  
6,2,3728.470588  
6,2,3416.011364  
6,2,2091.056122  
6,2,1998.629630  
6,2,4352.479545  
6,2,1748.068182  
6,2,3203.875000  
6,2,2059.357143  
6,2,4790.358974  
6,2,2045.316327  
6,2,4101.650000  
6,2,7533.511905  
6,2,3743.300000  
6,2,1956.650000  
6,2,1786.446809  
6,2,1812.529762  
6,2,4511.197674  
6,2,2230.625000  
6,2,4128.812500  
6,2,1556.311321  
6,2,3672.410714  
6,2,2695.793750  
6,2,3783.500000  
6,2,1625.897727  
6,2,3828.480769  
6,2,2232.473684  
6,2,2297.168478  
6,2,3603.463235  
6,2,2234.475000  
6,2,3593.171875  
6,2,4351.000000  
6,2,4952.326220  
6,2,4676.203125  
6,2,2364.911017  
6,2,1850.681818  
6,2,1594.348958  
6,2,1960.787162  
6,2,1654.152439  
6,2,2759.184211  
6,2,1948.081633  
6,2,3164.602041  
6,2,2962.169643  
6,2,1603.458333  
6,2,1662.287500

6,2,2007.666667  
6,2,1710.436275  
6,2,4009.256944  
6,2,2634.257353  
6,2,1545.957792  
6,2,2772.071429  
6,2,1917.268868  
6,2,2454.014423  
6,2,2915.800000  
6,2,2840.735849  
6,2,1763.659574  
6,2,1631.625000  
6,2,4563.184028  
6,2,2056.140306  
6,2,3605.177778  
6,2,2788.792453  
6,2,3209.286184  
6,2,2506.164634  
6,2,1952.814394  
6,2,2456.832569  
6,2,1677.953704  
6,2,2636.868932  
6,2,4071.942308  
6,2,1692.053191  
6,2,10606.938725  
6,2,1558.944444  
6,2,1702.750000  
6,2,1956.812500  
6,2,1516.862500  
6,2,2737.840116  
6,2,1624.750000  
6,2,1644.921875  
6,2,2563.822917  
6,2,1634.534884  
6,2,3036.599359  
6,2,1914.139535  
6,2,1654.690341  
6,2,1840.909091  
6,2,1505.023551  
6,2,1526.953125  
6,2,3131.515625  
6,2,2451.693750  
6,2,1615.122159  
6,2,1901.593750  
6,2,1917.367424  
6,2,4683.560000  
6,2,14081.136364  
6,2,2333.183824  
6,2,1841.507653  
6,2,2350.889706  
6,2,1513.375000  
6,2,1523.181818  
6,2,1628.668605  
6,2,9661.652778  
6,2,6334.295213  
6,2,1702.052326  
6,2,5957.818750  
6,2,2595.765625  
6,2,5506.303241  
6,2,2768.050000  
6,2,2448.125000  
6,2,1530.266892  
6,2,1951.125000  
6,2,2692.054878  
6,2,1580.325000  
6,2,2499.729167

6,2,1728.975000  
6,2,2034.830882  
6,2,1885.961957  
6,2,1650.137500  
6,2,2544.713235  
6,2,2119.363372  
6,2,1908.326923  
6,2,1543.329787  
6,2,3058.613636  
6,2,2981.763889  
6,2,2260.821429  
6,2,2791.441176  
6,2,2386.291667  
6,2,6550.711111  
6,2,1644.512195  
6,2,3423.711735  
6,2,1955.058673  
6,2,4982.806604  
6,2,1542.421875  
6,2,7278.425000  
6,2,1942.692308  
6,2,7396.833333  
6,2,2011.511364  
6,2,2049.192708  
6,2,2016.820000  
6,2,1718.974138  
6,2,2574.611111  
6,2,2406.938776  
6,2,2661.894737  
6,2,2197.324468  
6,2,3185.203947  
6,2,2414.273585  
6,2,2654.000000  
6,2,1780.100543  
6,2,1695.750000  
6,2,1508.857143  
6,2,2473.102273  
6,2,5215.087838  
6,2,2813.340426  
6,2,1524.300000  
6,2,3137.081081  
6,2,2809.090909  
6,2,2696.525000  
6,2,1920.776316  
6,2,3715.704545  
6,2,4481.063830  
6,2,1734.755952  
6,2,4001.149457  
6,2,2034.211957  
6,2,2001.574850  
6,2,4650.438830  
6,2,2049.283784  
6,2,1592.789216  
6,2,1973.730392  
6,2,3435.928571  
6,2,1637.466667  
6,2,2725.242021  
6,2,2127.204787  
6,2,4506.465625  
6,2,1868.047872  
6,2,1796.614865  
6,2,1750.234375  
6,2,1597.154605  
6,2,1747.211538  
6,2,1760.925532  
6,2,2276.791667

6,2,1809.470588  
6,2,1728.703125  
6,2,1585.024554  
6,2,1940.307927  
6,2,2216.087838  
6,2,2408.949153  
6,2,2278.775000  
6,2,3757.625000  
6,2,2735.368421  
6,2,2179.575000  
6,2,2249.223404  
6,2,2033.604592  
6,2,2621.673077  
6,2,1501.842105  
6,2,3253.139535  
6,2,1841.500000  
6,2,1720.952500  
6,2,2721.208955  
6,2,2760.613122  
6,2,5437.562500  
6,2,1510.145985  
6,2,2144.902273  
6,2,2143.435000  
6,2,3338.225000  
6,2,2071.125000  
6,2,2077.812500  
6,2,7478.637500  
6,2,2476.815657  
6,2,8258.718750  
6,2,12967.704545  
6,2,2095.006098  
6,2,1603.660377  
6,2,1799.384615  
6,2,5151.674419  
6,2,1596.512821  
6,2,1611.540816  
6,2,3036.148438  
6,2,1922.815217  
6,2,1501.125000  
6,2,2799.955729  
6,2,1686.833333  
6,2,5227.458333  
6,2,3266.071429  
6,2,1635.119792  
6,2,2468.019886  
6,2,3047.919643  
6,2,1877.060976  
6,2,1570.820122  
6,2,1533.428125  
6,2,2442.378676  
6,2,1931.855263  
6,2,1536.360000  
6,2,1729.875000  
6,2,12843.666667  
6,2,17382.583333  
6,2,1726.140625  
6,2,3694.102041  
6,2,1499.388889  
6,2,3848.046875  
6,2,2406.709302  
6,2,2026.872093  
6,2,1655.591837  
6,2,2115.947368  
6,2,2726.387755  
6,2,1751.333333  
6,2,7419.775943

6,2,1561.420732  
6,2,1669.911765  
6,2,2374.910256  
6,2,3051.557692  
6,2,2083.155612  
6,2,1602.659574  
6,2,6826.212500  
6,2,4465.400000  
6,2,1533.703947  
6,2,6757.432692  
6,2,2416.176136  
6,2,6449.232143  
6,2,2676.270000  
6,2,1902.992647  
6,2,2072.875000  
6,2,1641.591837  
6,2,1549.147059  
6,2,2201.573529  
6,2,2326.815000  
6,2,2553.926282  
6,2,1547.118750  
6,2,1592.455556  
6,2,2112.698864  
6,2,2253.930804  
6,2,7269.333333  
6,2,1606.525862  
6,2,2113.175481  
6,2,1921.290698  
6,2,1549.388889  
6,2,2397.352941  
6,2,1685.272727  
6,2,5154.352941  
6,2,4488.195000  
6,2,2224.703196  
6,2,2505.883721  
6,2,1634.960784  
6,2,2009.611842  
6,2,2760.791667  
6,2,2015.191176  
6,2,2610.527439  
6,2,2403.184783  
6,2,1920.311404  
6,2,2420.163793  
6,2,2093.640625  
6,2,1505.662234  
6,2,1787.375000  
6,2,2218.604545  
6,2,2490.553977  
6,2,2037.990854  
6,2,2109.625000  
6,2,1976.889205  
6,2,3310.865854  
6,2,2894.771277  
6,2,3743.509434  
6,2,3207.066176  
6,2,1841.039474  
6,2,2860.134146  
6,2,1638.500000  
6,2,1722.486111  
6,2,1528.824468  
6,2,1537.673611  
6,2,4112.895833  
6,2,4230.402439  
6,2,1550.460937  
6,2,1789.677500  
6,2,6476.185714

6,2,1626.293478  
6,2,4785.414634  
6,2,1774.481771  
6,2,1525.904070  
6,2,2960.359375  
6,2,1939.911950  
6,2,2720.658537  
6,2,4421.725000  
6,2,2246.377551  
6,2,2223.540625  
6,2,5740.511905  
6,2,2290.683333  
6,2,1959.532609  
6,2,1801.144886  
6,2,1774.549020  
6,2,1639.414634  
6,2,2176.640625  
6,2,1739.540698  
6,2,1606.461538  
6,2,2177.402174  
6,2,2568.607843  
6,2,2872.980263  
6,2,2495.000000  
6,2,1904.570652  
6,2,2159.247159  
6,2,2128.063889  
6,2,1681.197674  
6,2,1629.304054  
6,2,1931.274457  
6,2,12984.019231  
6,2,1763.652778  
6,2,1528.145349  
6,2,3184.003676  
6,2,2924.157609  
6,2,2478.558824  
6,2,1812.098039  
6,2,15816.417553  
6,2,4251.972222  
6,2,1731.739130  
6,2,3455.526042  
6,2,2283.259804  
6,2,3480.037234  
6,2,2700.423913  
6,2,3456.346154  
6,2,1731.625000  
6,2,2917.195122  
6,2,1982.058511  
6,2,2476.583333  
6,2,2849.684783  
6,2,2273.136364  
6,2,1791.202381  
6,2,1758.186047  
6,2,2772.105932  
6,2,2185.330000  
6,2,2305.734043  
6,2,1647.316667  
6,2,3400.450581  
6,2,3090.925000  
6,2,3966.391026  
6,2,1558.721154  
6,2,2920.060976  
6,2,1688.488889  
6,2,6510.000000  
6,2,2587.806250  
6,2,1789.467105  
6,2,3340.416667

6,2,2244.601190  
6,2,2509.763298  
6,2,11065.038462  
6,2,2094.712264  
6,2,2872.201531  
6,2,1838.166667  
6,2,2120.315217  
6,2,2552.900000  
6,2,2203.036111  
6,2,1791.268868  
6,2,1866.940476  
6,2,2646.867188  
6,2,1721.732484  
6,2,1649.143939  
6,2,2197.333333  
6,2,1959.369048  
6,2,1590.190476  
6,2,2500.927632  
6,2,1682.031250  
6,2,1540.408333  
6,2,3929.666667  
6,2,1517.750000  
6,2,2101.088889  
6,2,1952.895455  
6,2,1872.421053  
6,2,2688.868750  
6,2,2426.625000  
6,2,3848.240000  
6,2,3888.823113  
6,2,1591.494444  
6,2,3949.377907  
6,2,1552.236702  
6,2,2493.864407  
6,2,1533.068182  
6,2,1645.791667  
6,2,2164.136364  
6,2,2252.725000  
6,2,1622.316489  
6,2,4013.846154  
6,2,1645.775000  
6,2,1696.769231  
6,2,1556.417763  
6,2,2034.976744  
6,2,2973.021875  
6,2,5843.958333  
6,2,2350.299479  
6,2,3999.065000  
6,2,1640.230263  
6,2,3363.187500  
6,2,1897.416667  
6,2,2328.451220  
6,2,1888.268293  
6,2,1662.908163  
6,2,1650.687500  
6,2,1763.454545  
6,2,2347.894022  
6,2,1659.867647  
6,2,2754.893617  
6,2,2024.666667  
6,2,2620.232558  
6,2,2906.117500  
6,2,2955.414062  
6,2,1571.011111  
6,2,2083.236111  
6,2,2623.653409  
6,2,1700.811321

6,2,1800.587500  
6,2,2201.313725  
6,2,1607.075000  
6,2,2311.096154  
6,2,1515.988636  
6,2,2284.809375  
6,2,2428.315789  
6,2,2826.339744  
6,2,1547.132353  
6,2,1778.728723  
6,2,1524.525641  
6,2,1677.094828  
6,2,1842.228723  
6,2,2142.546875  
6,2,14586.578488  
6,2,2739.377778  
6,2,2701.384615  
6,2,4142.038043  
6,2,3111.553571  
6,2,2619.547297  
6,2,2425.568182  
6,2,1741.790323  
6,2,2252.477041  
6,2,3145.500000  
6,2,1773.910326  
6,2,1580.848214  
6,2,3136.353125  
6,2,18970.500000  
6,2,3590.995192  
6,2,3846.015625  
6,2,2141.212500  
6,2,2242.978261  
6,2,1995.119048  
6,2,1561.286765  
6,2,3251.728261  
6,2,14667.785714  
6,2,3006.275000  
6,2,2086.684211  
6,2,2750.809524  
6,2,1760.743842  
6,2,2192.707317  
6,2,2056.368750  
6,2,1507.750000  
6,2,1766.048913  
6,2,1634.466667  
6,2,7549.500000  
6,2,1776.576923  
6,2,1708.070652  
6,2,9488.303571  
6,2,2529.625000  
6,2,2023.804545  
6,2,1893.107143  
6,2,3831.260000  
6,2,2099.807692  
6,2,1792.390244  
6,2,1541.368750  
6,2,5890.322917  
6,2,2319.979592  
6,2,2107.414894  
6,2,1991.382979  
6,2,2204.868421  
6,2,2192.489130  
6,2,1587.187500  
6,2,3733.743455  
6,2,2790.069767  
6,2,1579.161184

6,2,7135.022727  
6,2,2845.847222  
6,2,1733.400000  
6,2,1912.794643  
6,2,3500.083333  
6,2,1821.812500  
6,2,1630.271739  
6,2,3488.595745  
6,2,1934.467500  
6,2,3940.191327  
6,2,2833.500000  
6,2,4190.333333  
6,2,1876.500000  
6,2,4257.511364  
6,2,2956.410714  
6,2,2115.017442  
6,2,2666.210938  
6,2,1903.611111  
6,2,2229.680000  
6,2,3921.555000  
6,2,2156.670455  
6,2,1511.837054  
6,2,3355.605932  
6,2,2189.987805  
6,2,2444.958333  
6,2,1802.862179  
6,2,2029.684211  
6,2,1537.792683  
6,2,2211.250000  
6,2,3761.322222  
6,2,17501.915761  
6,2,2347.720000  
6,2,2900.489362  
6,2,1532.463542  
6,2,2963.475000  
6,2,2373.225000  
6,2,1911.377419  
6,2,1940.867188  
6,2,2137.270833  
6,2,2030.187500  
6,2,1938.000000  
6,2,1801.164062  
6,2,1525.158537  
6,2,1544.143382  
6,2,1823.436321  
6,2,2291.271739  
6,2,2139.034091  
6,2,4887.380435  
6,2,2146.916667  
6,2,3073.894022  
6,2,1753.929688  
6,2,1861.250000  
6,2,1943.796512  
6,2,1848.100490  
6,2,2461.869565  
6,2,1574.026786  
6,2,1609.172297  
6,2,4239.861111  
6,2,1879.153061  
6,2,2687.375000  
6,2,1744.794118  
6,2,10582.638587  
6,2,1509.100000  
6,2,2494.583333  
6,2,1630.153846  
6,2,1771.181250

6,2,2026.940476  
6,2,1739.613095  
6,2,1745.293367  
6,2,1814.368182  
6,2,2703.666667  
6,2,2372.440000  
6,2,1503.233333  
6,2,2796.343750  
6,2,2712.125000  
6,2,2286.147436  
6,2,1817.111702  
6,2,1916.964286  
6,2,6612.843750  
6,2,1783.476190  
6,2,1716.912037  
6,2,4933.365385  
6,2,1645.184375  
6,2,1567.546512  
6,2,3135.287500  
6,2,1552.108696  
6,2,4246.604167  
6,2,1506.440000  
6,2,2341.085938  
6,2,3194.640244  
6,2,2054.714286  
6,2,1528.950000  
6,2,5393.755556  
6,2,1514.510870  
6,2,2177.104167  
6,2,2272.630000  
6,2,2984.769231  
6,2,1967.119048  
6,2,4376.540761  
6,2,1932.856250  
6,2,1544.812500  
6,2,5009.171053  
6,2,1569.853659  
6,2,2932.507143  
6,2,2094.921053  
6,2,2185.950980  
6,2,4981.500000  
6,2,2008.315217  
6,2,2184.061224  
6,2,3437.192982  
6,2,1743.171512  
6,2,1600.633333  
6,2,1695.307692  
6,2,2041.517857  
6,2,2783.559783  
6,2,2996.160714  
6,2,1599.535714  
6,2,2769.230114  
6,2,3226.529255  
6,2,1571.049479  
6,2,3247.659574  
6,2,7286.452206  
6,2,1573.718750  
6,2,5766.031250  
6,2,1963.733333  
6,2,3127.107558  
6,2,1751.476190  
6,2,2024.343023  
6,2,2328.036184  
6,2,3831.801471  
6,2,4564.515625  
6,2,1515.529070

6,2,1753.380435  
6,2,1787.162500  
6,2,1536.875000  
6,2,2678.615385  
6,2,2758.071429  
6,2,2253.416667  
6,2,5587.897727  
6,2,1891.487981  
6,2,7884.489362  
6,2,1772.485000  
6,2,1536.985849  
6,2,3774.150510  
6,2,2581.850000  
6,2,6169.693182  
6,2,2116.895833  
6,2,1501.413043  
6,2,1801.813953  
6,2,2114.960526  
6,2,3010.489362  
6,2,2619.496875  
6,2,1851.500000  
6,2,3021.812500  
6,2,2212.497449  
6,2,5639.017157  
6,2,2194.385417  
6,2,1888.823864  
6,2,2776.048913  
6,2,1604.924342  
6,2,2241.505102  
6,2,1542.420455  
6,2,1770.029255  
6,2,3150.527778  
6,2,2196.306250  
6,2,6416.331395  
6,2,1943.635870  
6,2,2008.375000  
6,2,4256.138158  
6,2,2315.232143  
6,2,2638.906977  
6,2,3508.338068  
6,2,1975.794444  
6,2,1866.607143  
6,2,1653.119444  
6,2,3479.390000  
6,2,2138.451613  
6,2,2385.952500  
6,2,1535.716463  
6,2,2179.583333  
6,2,1850.293750  
6,2,2008.484756  
6,2,1559.369318  
6,2,8292.205128  
6,2,2747.484649  
6,2,2756.500000  
6,2,2688.952703  
6,2,2073.783730  
6,2,2634.144886  
6,2,1517.583333  
6,2,1730.606250  
6,2,2312.589744  
6,2,1840.652174  
6,2,1521.456250  
6,2,5033.356707  
6,2,2482.500000  
6,2,2426.685000  
6,2,2710.568182

6,2,1595.590909  
6,2,3163.375000  
6,2,1552.735294  
6,2,2638.625000  
6,2,4255.089844  
6,2,4068.166667  
6,2,1556.500000  
6,2,1624.061224  
6,2,3553.198529  
6,2,1663.493902  
6,2,3074.587054  
6,2,1584.916667  
6,2,1716.368243  
6,2,2287.617647  
6,2,1597.136628  
6,2,2605.062500  
6,2,1870.625000  
6,2,2639.665761  
6,2,4169.507212  
6,2,10204.325000  
6,2,2015.677419  
6,2,1639.491379  
6,2,5836.120968  
6,2,1512.577703  
6,2,2129.494318  
6,2,1702.520833  
6,2,2984.895161  
6,2,2655.268519  
6,2,2483.804348  
6,2,7212.104167  
6,2,4452.436842  
6,2,2543.500000  
6,2,3232.203488  
6,2,1525.881579  
6,2,1696.942857  
6,2,2013.571429  
6,2,1877.935484  
6,2,1797.000000  
6,2,8291.590909  
6,2,2011.106771  
6,2,2002.941667  
6,2,4249.125000  
6,2,1772.780000  
6,2,2173.451220  
6,2,3097.621951  
6,2,1585.209302  
6,2,6379.696078  
6,2,1627.488636  
6,2,5061.401442  
6,2,1591.375000  
6,2,1711.642857  
6,2,5561.551724  
6,2,2275.089286  
6,2,1692.043750  
6,2,1937.894737  
6,2,2433.822222  
6,2,4705.860465  
6,2,2400.285714  
6,2,4295.593750  
6,2,2448.420213  
6,2,4565.041667  
6,2,1986.952381  
6,2,4046.689024  
6,2,2869.016892  
6,2,1765.750000  
6,2,7847.156250

6,2,3379.868421  
6,2,2504.508065  
6,2,4914.573529  
6,2,2323.384615  
6,2,3227.615385  
6,2,1699.505435  
6,2,4467.323045  
6,2,14203.412500  
6,2,2700.045455  
6,2,1889.972826  
6,2,1750.503571  
6,2,5659.214286  
6,2,1799.695312  
6,2,4963.833333  
6,2,3689.098039  
6,2,2690.068182  
6,2,3074.392857  
6,2,1640.763158  
6,2,2403.970588  
6,2,10252.103261  
6,2,1512.500000  
6,2,2756.254902  
6,2,1635.143617  
6,2,1877.860000  
6,2,2447.448113  
6,2,3920.646739  
6,2,4754.787500  
6,2,1978.502976  
6,2,7706.000000  
6,2,1518.662162  
6,2,2366.857143  
6,2,6657.816176  
6,2,2093.594512  
6,2,3665.542453  
6,2,2366.317308  
6,2,3584.213889  
6,2,1572.257143  
6,2,1511.476744  
6,2,1886.153846  
6,2,2172.156863  
6,2,3103.210000  
6,2,2389.005814  
6,2,4167.158163  
6,2,1899.843750  
6,2,2210.571429  
6,2,2743.539286  
6,2,1776.587838  
6,2,7329.421053  
6,2,6732.963235  
6,2,13509.826705  
6,2,2118.393617  
6,2,5495.564516  
6,2,2577.381410  
6,2,2614.382143  
6,2,1938.243590  
6,2,2826.167614  
6,2,2003.209302  
6,2,1877.268293  
6,2,1729.562500  
6,2,2505.881944  
6,2,9236.453431  
6,2,2601.402439  
6,2,1558.296429  
6,2,3169.397727  
6,2,2014.927885  
6,2,1988.220588

6,2,2540.750000  
6,2,2634.063636  
6,2,5236.250000  
6,2,1752.404891  
6,2,2582.585106  
6,2,1908.473684  
6,2,2341.675676  
6,2,1616.644809  
6,2,2295.813953  
6,2,1650.120690  
6,2,1588.857500  
6,2,1947.708333  
6,2,4200.714286  
6,2,4695.416667  
6,2,1570.825581  
6,2,4435.048913  
6,2,1692.526316  
6,2,1575.045918  
6,2,2795.011364  
6,2,6180.562500  
6,2,1505.037500  
6,2,2324.170455  
6,2,2389.875000  
6,2,1633.638889  
6,2,1704.175000  
6,2,3213.924479  
6,2,1864.800000  
6,2,6058.286364  
6,2,1775.855769  
6,2,1577.046053  
6,2,1624.659091  
6,2,4680.625000  
6,2,1778.202703  
6,2,2898.776042  
6,2,2916.953125  
6,2,3589.304813  
6,2,2378.690909  
6,2,16726.000000  
6,2,1733.218085  
6,2,2122.585106  
6,2,1783.545455  
6,2,1520.449664  
6,2,1559.653846  
6,2,1827.744898  
6,2,1611.565972  
6,2,5860.127315  
6,2,1660.687500  
6,2,1581.269231  
6,2,1978.047619  
6,2,3930.719388  
6,2,2406.136905  
6,2,2309.193396  
6,2,1925.286765  
6,2,9398.500000  
6,2,2284.537500  
6,2,2328.627451  
6,2,1682.382653  
6,2,1591.332317  
6,2,2593.113636  
6,2,3945.418269  
6,2,2342.793269  
6,2,1514.368421  
6,2,1604.750000  
6,2,3328.256579  
6,2,1536.515625  
6,2,3271.857143

6,2,1581.054348  
6,2,1565.364865  
7,1,2835.982143  
7,1,10420.432432  
7,1,5836.878472  
7,1,1556.166667  
7,1,4731.589744  
7,1,5025.829545  
7,1,1570.104167  
7,1,8142.952703  
7,1,14112.769737  
7,1,15458.864130  
7,1,2900.700000  
7,1,4141.755814  
7,1,2456.761719  
7,1,13456.425000  
7,1,3690.832317  
7,1,2938.434659  
7,1,2458.026316  
7,1,19106.696970  
7,1,2517.314103  
7,1,3174.526316  
7,1,2493.407143  
7,1,2744.138889  
7,1,2883.581395  
7,1,3236.587500  
7,1,4698.404412  
7,1,4456.671296  
7,1,7248.789062  
7,1,2952.250000  
7,1,1740.619681  
7,1,16908.469388  
7,1,6228.151596  
7,1,4815.921512  
7,1,6773.931818  
7,1,17070.364865  
7,1,8364.084302  
7,1,13044.364362  
7,1,2021.639706  
7,1,2729.281481  
7,1,3165.582317  
7,1,13579.114583  
7,1,2434.015625  
7,1,6527.687500  
7,1,1833.758929  
7,1,2140.414894  
7,1,12186.205556  
7,1,19184.252874  
7,1,7201.208333  
7,1,2031.156250  
7,1,5475.944444  
7,1,16721.125000  
7,1,1770.269231  
7,1,1632.042553  
7,1,4715.443548  
7,1,2186.622222  
7,1,1563.642857  
7,1,5449.152174  
7,1,2610.500000  
7,1,5239.735294  
7,1,3391.777778  
7,1,2299.875000  
7,1,1863.607558  
7,1,2255.054688  
7,1,3364.000000  
7,1,3333.186047

7,1,2906.250000  
7,1,3131.604730  
7,1,3090.348684  
7,1,2682.141304  
7,1,4412.355769  
7,1,1672.178125  
7,1,1955.750000  
7,1,3321.944444  
7,1,2359.218750  
7,1,1937.975543  
7,1,2388.772727  
7,1,3539.184783  
7,1,4033.332547  
7,1,18596.666667  
7,1,3966.166667  
7,1,3072.724265  
7,1,4904.576923  
7,1,5591.015625  
7,1,8265.490854  
7,1,7025.666667  
7,1,10598.638587  
7,1,2420.116667  
7,1,6275.441964  
7,1,2175.375000  
7,1,1597.833333  
7,1,4669.360795  
7,1,6555.785256  
7,1,5274.182927  
7,1,5776.492647  
7,1,3229.519231  
7,1,4067.852941  
7,1,1550.612981  
7,1,2453.170213  
7,1,13170.038462  
7,1,5123.463235  
7,1,1920.954861  
7,1,2144.547297  
7,1,2629.287234  
7,1,2610.995000  
7,1,2015.808511  
7,1,2033.333333  
7,1,2822.375000  
7,1,2673.400000  
7,1,4334.747093  
7,1,12459.906977  
7,1,2237.312500  
7,1,2839.561047  
7,1,1814.331731  
7,1,3031.333333  
7,1,2458.826923  
7,1,10293.956522  
7,1,15291.000000  
7,1,2535.217391  
7,1,3482.734375  
7,1,5576.962838  
7,1,13842.818452  
7,1,2236.937500  
7,1,12337.622283  
7,1,1796.000000  
7,1,5126.770833  
7,1,1507.453125  
7,1,2430.227273  
7,1,3316.862245  
7,1,6224.894737  
7,1,6450.732955  
7,1,8019.115385

7,1,1658.234043  
7,1,3640.750000  
7,1,8215.565217  
7,1,2658.525000  
7,1,2195.782609  
7,1,3656.430233  
7,1,7921.784884  
7,1,1797.163265  
7,1,2357.416667  
7,1,9666.250000  
7,1,2479.450000  
7,1,3977.924242  
7,1,1878.025641  
7,1,1543.038462  
7,1,13817.787500  
7,1,16791.798469  
7,1,4754.804348  
7,1,2304.272727  
7,1,2670.975610  
7,1,3293.204082  
7,1,2964.961538  
7,1,1595.466667  
7,1,6233.652174  
7,1,10535.462500  
7,1,2419.485294  
7,1,6410.875000  
7,1,1564.750000  
7,1,2711.943396  
7,1,3080.767857  
7,1,2048.740385  
7,1,7659.000000  
7,1,3186.918103  
7,1,1923.176829  
7,1,3034.808824  
7,1,1685.103571  
7,1,2819.481707  
7,1,3125.975000  
7,1,2149.079545  
7,1,2930.699324  
7,1,6739.484043  
7,1,3339.685897  
7,1,3056.932692  
7,1,1931.838710  
7,1,18611.292683  
7,1,12276.366667  
7,1,1822.390625  
7,1,4545.627404  
7,1,3706.000000  
7,1,4227.180556  
7,1,2829.172794  
7,1,3935.321875  
7,1,12288.392857  
7,1,8180.960227  
7,1,2898.096774  
7,1,7315.697917  
7,1,5164.384615  
7,1,4015.250000  
7,1,3686.514535  
7,1,5906.400000  
7,1,4382.352273  
7,1,2664.200000  
7,1,1728.375000  
7,1,2498.724265  
7,1,7340.285714  
7,1,1865.903846  
7,1,2015.187500

7,1,5867.907051  
7,1,2320.153846  
7,1,1670.841463  
7,1,2008.172222  
7,1,5742.475610  
7,1,1735.281250  
7,1,14665.529412  
7,1,1708.944149  
7,1,3182.145833  
7,1,3387.512500  
7,1,2489.424242  
7,1,7297.287500  
7,1,1721.682432  
7,1,3992.525000  
7,1,3750.537736  
7,1,5498.155000  
7,1,2950.429878  
7,1,2474.733333  
7,1,3182.820513  
7,1,5107.502315  
7,1,2202.644444  
7,1,1686.678571  
7,1,1803.250000  
7,1,2122.750000  
7,1,2005.750000  
7,1,1755.088542  
7,1,4737.066667  
7,1,17518.403061  
7,1,2736.854730  
7,1,2365.565625  
7,1,7188.970930  
7,1,2250.228571  
7,1,3789.288462  
7,1,2211.813953  
7,1,3933.488889  
7,1,7499.007143  
7,1,1565.666667  
7,1,3421.496711  
7,1,5610.612245  
7,1,2447.030488  
7,1,7167.000000  
7,1,4185.005435  
7,1,2000.276786  
7,1,7827.184211  
7,1,2697.993056  
7,1,2672.776596  
7,1,2009.300000  
7,1,11029.529412  
7,1,3406.000000  
7,1,1724.842105  
7,1,5434.741379  
7,1,6062.250000  
7,1,4451.175926  
7,1,2669.571429  
7,1,1625.620690  
7,1,2876.621622  
7,1,4170.928977  
7,1,1534.625000  
7,1,6297.375000  
7,1,2170.967262  
7,1,2359.796053  
7,1,2903.538793  
7,1,1565.493590  
7,1,3117.018939  
7,1,1630.058824  
7,1,5941.442857

7,1,4558.897727  
7,1,2984.346154  
7,1,1949.389706  
7,1,6193.615385  
7,1,1701.713415  
7,1,1960.071429  
7,1,6717.293269  
7,1,8016.101351  
7,1,1731.241379  
7,1,9360.428571  
7,1,10088.176471  
7,1,4652.000000  
7,1,1555.237805  
7,1,4208.414634  
7,1,1767.519231  
7,1,2301.553571  
7,1,3210.022222  
7,1,2675.441860  
7,1,2142.750000  
7,1,1633.529412  
7,1,7905.914474  
7,1,3423.269231  
7,1,2858.835366  
7,1,2538.239130  
7,1,2474.247093  
7,1,5168.049479  
7,1,2639.052632  
7,1,1754.067935  
7,1,1749.169643  
7,1,14875.272727  
7,1,16068.550000  
7,1,3220.605769  
7,1,9949.117857  
7,1,1717.451389  
7,1,5326.217391  
7,1,1664.540000  
7,1,1630.360465  
7,1,3965.454327  
7,1,6226.037500  
7,1,5295.350000  
7,1,2892.246875  
7,1,8962.125000  
7,1,6857.428571  
7,1,3325.562500  
7,1,2953.176471  
7,1,2239.994565  
7,1,5850.832143  
7,1,2500.939189  
7,1,8724.469697  
7,1,1995.648649  
7,1,1925.000000  
7,1,2454.959302  
7,1,4259.477564  
7,1,3511.055556  
7,1,2219.414634  
7,1,9536.333333  
7,1,1971.738462  
7,1,1819.934659  
7,1,10654.180556  
7,1,2446.000000  
7,1,3859.517857  
7,1,6327.000000  
7,1,4659.500000  
7,1,3580.446023  
7,1,2538.744565  
7,1,5585.625000

7,1,1640.435606  
7,1,2426.146875  
7,1,10561.200000  
7,1,1970.677083  
7,1,16871.743590  
7,1,3691.875000  
7,1,2294.354839  
7,1,4356.142857  
7,1,4596.950000  
7,1,1663.982143  
7,1,1827.875000  
7,1,5363.101064  
7,1,1647.451531  
7,1,1686.154605  
7,1,2551.522727  
7,1,1505.026786  
7,1,5821.678571  
7,1,5401.752632  
7,1,6260.703947  
7,1,1680.044118  
7,1,1633.268750  
7,1,3143.404255  
7,1,2238.067308  
7,1,2365.871429  
7,1,2068.615625  
7,1,8598.209375  
7,1,5497.562500  
7,1,6691.821429  
7,1,2490.194444  
7,1,10308.295455  
7,1,2475.846154  
7,1,4869.627660  
7,1,6123.000000  
7,1,2941.333333  
7,1,1809.312500  
7,1,3185.053571  
7,1,3735.425000  
7,1,3194.666667  
7,1,3276.960000  
7,1,10687.684211  
7,1,3148.375000  
7,1,2489.125000  
7,1,1954.521739  
7,1,2698.005682  
7,1,1586.928571  
7,1,1842.213235  
7,1,19780.423387  
7,1,2243.625000  
7,1,6075.538462  
7,1,3733.588235  
7,1,1523.000000  
7,1,2888.562500  
7,1,2701.677778  
7,1,2400.542857  
7,1,2367.217391  
7,1,6962.986486  
7,1,6968.823529  
7,1,19273.958333  
7,1,13719.743902  
7,1,2294.494048  
7,1,1722.224265  
7,1,15348.175595  
7,1,2569.133523  
7,1,16290.257143  
7,1,1546.425000  
7,1,12957.250000

7,1,4342.888889  
7,1,3543.731707  
7,1,2129.127451  
7,1,6437.790625  
7,1,1684.071429  
7,1,2949.576087  
7,1,4051.757353  
7,1,5437.500000  
7,1,2270.981250  
7,1,2144.382353  
7,1,3747.946875  
7,1,2178.725000  
7,1,2697.000000  
7,1,2122.259375  
7,1,16399.666667  
7,1,4251.093750  
7,1,5963.692308  
7,1,5972.146341  
7,1,2474.947674  
7,1,1593.321429  
7,1,2160.436047  
7,1,3266.656250  
7,1,1583.218750  
7,1,2814.714674  
7,1,7810.910156  
7,1,3288.500000  
7,1,7308.310811  
7,1,2292.746711  
7,1,8420.161290  
7,1,3303.064516  
7,1,4043.517857  
7,1,5444.416667  
7,1,12005.405405  
7,1,12879.896429  
7,1,3270.414474  
7,1,1950.398649  
7,1,2413.116935  
7,1,1944.023256  
7,1,8193.902027  
7,1,16378.236486  
7,1,1871.454082  
7,1,2916.188679  
7,1,1810.884615  
7,1,1958.700581  
7,1,1962.722892  
7,1,4030.981250  
7,1,3881.357143  
7,1,5970.250000  
7,1,2269.277778  
7,1,1905.909091  
7,1,2400.694767  
7,1,5625.569079  
7,1,4325.513158  
7,1,3025.786932  
7,1,2733.833333  
7,1,8073.785326  
7,1,3897.875000  
7,1,2356.597656  
7,1,10157.195122  
7,1,12101.443750  
7,1,2847.456897  
7,1,4606.482143  
7,1,10192.091463  
7,1,2434.002604  
7,1,9476.193548  
7,1,10336.230769

7,1,3128.961538  
7,1,8230.500000  
7,1,13620.906977  
7,1,4789.665441  
7,1,3158.641304  
7,1,5464.553030  
7,1,2811.273438  
7,1,10526.350000  
7,1,10350.921196  
7,1,13513.571429  
7,1,2243.370370  
7,1,6679.406250  
7,1,2051.058824  
7,1,2185.355769  
7,1,1608.471429  
7,1,1885.434783  
7,1,2095.431250  
7,1,7781.886111  
7,1,4925.625000  
7,1,4486.547297  
7,1,4803.201923  
7,1,7108.649390  
7,1,2723.250000  
7,1,1994.017857  
7,1,1560.880814  
7,1,6304.470109  
7,1,5062.075581  
7,1,1807.802778  
7,1,5108.437500  
7,1,3515.945312  
7,1,3358.687500  
7,1,2656.015625  
7,1,3150.057692  
7,1,1724.125000  
7,1,2262.678571  
7,1,13051.046875  
7,1,3104.285714  
7,1,1965.612500  
7,1,3281.291667  
7,1,1505.216216  
7,1,1692.619565  
7,1,8097.253472  
7,1,9352.944444  
7,1,4122.260417  
7,1,2097.791667  
7,1,6887.272222  
7,1,11741.710526  
7,1,7199.159091  
7,1,2532.260135  
7,1,2253.750000  
7,1,19987.842593  
7,1,2367.195652  
7,1,1549.750000  
7,1,2059.250000  
7,1,2954.194149  
7,1,12625.746622  
7,1,2919.298913  
7,1,3266.468750  
7,1,1515.683333  
7,1,4921.936170  
7,1,1901.434783  
7,1,7116.000000  
7,1,1989.150862  
7,1,12595.850610  
7,1,2748.454787  
7,1,2914.252778

7,1,5343.989796  
7,1,1715.228261  
7,1,3642.875000  
7,1,2014.106771  
7,1,16439.974138  
7,1,1749.673077  
7,1,2651.530405  
7,1,2085.691860  
7,1,4642.297794  
7,1,3563.744318  
7,1,1936.722222  
7,1,1846.962209  
7,1,3741.181818  
7,1,2599.375000  
7,1,11372.945946  
7,1,2049.761111  
7,1,1690.500000  
7,1,4393.535714  
7,1,3747.093023  
7,1,2888.510204  
7,1,2124.727273  
7,1,4330.764706  
7,1,7999.243056  
7,1,1571.819853  
7,1,2595.270833  
7,1,9717.625000  
7,1,4089.818182  
7,1,2205.000000  
7,1,12418.225806  
7,1,2471.833333  
7,1,1723.420000  
7,1,18502.203488  
7,1,1695.969697  
7,1,3435.142857  
7,1,4041.125000  
7,1,15438.465909  
7,1,2768.967262  
7,1,3021.909091  
7,1,2899.476190  
7,1,4230.562500  
7,1,2760.758333  
7,1,8128.562500  
7,1,1876.791667  
7,1,1805.896739  
7,1,5001.428571  
7,1,4387.958333  
7,1,2774.628205  
7,1,1839.118421  
7,1,1504.993243  
7,1,10102.106481  
7,1,6644.608108  
7,1,17859.614583  
7,1,3685.962500  
7,1,4651.857143  
7,1,4571.980769  
7,1,9172.352273  
7,1,2183.256098  
7,1,1697.310976  
7,1,2772.213068  
7,1,1628.688889  
7,1,7794.744565  
7,1,2689.212500  
7,1,2042.812500  
7,1,18289.290816  
7,1,2059.300781  
7,1,12984.545139

7,1,4424.363889  
7,1,2272.491477  
7,1,1955.659091  
7,1,2638.030172  
7,1,1892.578125  
7,1,9097.571875  
7,1,1738.482558  
7,1,3998.804348  
7,1,2250.968750  
7,1,1702.454545  
7,1,2060.068182  
7,1,1563.916667  
7,1,2951.187500  
7,1,4084.451613  
7,1,2921.931034  
7,1,1850.110000  
7,1,1500.976562  
7,1,2766.461806  
7,1,3243.950000  
7,1,2673.875000  
7,1,7393.727041  
7,1,1638.883721  
7,1,7013.468750  
7,1,1500.720000  
7,1,3886.830128  
7,1,6505.710938  
7,1,1984.356707  
7,1,3861.092742  
7,1,10099.629808  
7,1,1976.795213  
7,1,9893.388889  
7,1,4905.736111  
7,1,1897.335526  
7,1,7873.675000  
7,1,4460.312500  
7,1,1580.961538  
7,1,2214.776316  
7,1,4066.137097  
7,1,5936.384868  
7,1,2136.238208  
7,1,1742.214286  
7,1,15883.911184  
7,1,15531.356250  
7,1,6133.136364  
7,1,2481.661111  
7,1,1585.991071  
7,1,1633.955556  
7,1,15251.062500  
7,1,9247.744186  
7,1,3734.048387  
7,1,15870.169118  
7,1,8600.113889  
7,1,1542.463889  
7,1,2732.937500  
7,1,5216.973684  
7,1,2276.694444  
7,1,1657.552632  
7,1,4708.870466  
7,1,7438.380952  
7,1,10564.817073  
7,1,4519.160000  
7,1,7557.920455  
7,1,10275.032895  
7,1,2448.205882  
7,1,16404.933333  
7,1,9964.413043

7,1,2970.538462  
7,1,2441.228261  
7,1,1859.689024  
7,1,2824.444444  
7,1,3974.687500  
7,1,1520.191489  
7,1,6582.948171  
7,1,2338.441860  
7,1,1875.850610  
7,1,4756.821429  
7,1,2533.278846  
7,1,1884.566489  
7,1,2835.380952  
7,1,1829.375000  
7,1,5878.925676  
7,1,4711.083333  
7,1,2325.829787  
7,1,1644.524306  
7,1,3242.924107  
7,1,6177.189189  
7,1,2190.570000  
7,1,9192.653409  
7,1,2811.184211  
7,1,2747.523810  
7,1,3173.493750  
7,1,2635.677632  
7,1,4661.735577  
7,1,2461.315476  
7,1,1709.167969  
7,1,3815.647321  
7,1,6655.347222  
7,1,1511.394737  
7,1,3604.441176  
7,1,12532.560811  
7,1,1595.793103  
7,1,4170.634615  
7,1,5997.896277  
7,1,2142.812500  
7,1,13536.500000  
7,1,6722.000000  
7,1,2804.489362  
7,1,2369.000000  
7,1,1813.768382  
7,1,4216.790210  
7,1,4286.954545  
7,1,2791.127660  
7,1,5134.944444  
7,1,1915.391304  
7,1,5277.100610  
7,1,3705.478723  
7,1,2311.795918  
7,1,17244.750000  
7,1,2313.719512  
7,1,2515.500000  
7,1,2097.234104  
7,1,8080.916667  
7,1,3435.987500  
7,1,1930.384146  
7,1,17482.813953  
7,1,1650.359375  
7,1,4438.154762  
7,1,3086.692308  
7,1,2558.485714  
7,1,5105.026042  
7,1,9345.200658  
7,1,3603.804348

7,1,2307.500000  
7,1,11934.369048  
7,1,8505.970745  
7,1,16062.634615  
7,1,3173.071429  
7,1,3363.181818  
7,1,1778.905488  
7,1,1994.297794  
7,1,1911.005952  
7,1,1568.218750  
7,1,1769.285714  
7,1,1833.125000  
7,1,1816.612500  
7,1,15089.723485  
7,1,13480.538462  
7,1,12778.865385  
7,1,2176.793750  
7,1,8256.982558  
7,1,1687.567568  
7,1,5367.608696  
7,1,2633.416667  
7,1,1886.398026  
7,1,2877.509868  
7,1,2435.841912  
7,1,8527.500000  
7,1,3528.520833  
7,1,4240.625000  
7,1,7957.375000  
7,1,1798.041667  
7,1,6286.335366  
7,1,2091.192568  
7,1,17270.632979  
7,1,4532.031250  
7,1,14921.726190  
7,1,4297.069767  
7,1,12161.548780  
7,1,1776.613636  
7,1,5404.279891  
7,1,2870.383152  
7,1,15524.075000  
7,1,1568.541667  
7,1,2291.568452  
7,1,2110.960937  
7,1,5681.639423  
7,1,2126.500000  
7,1,3482.010135  
7,1,6127.418605  
7,1,3011.766129  
7,1,17158.500000  
7,1,4225.375000  
7,1,8241.032258  
7,1,1518.714286  
7,1,2618.666667  
7,1,2185.230769  
7,1,3456.066667  
7,1,4923.178571  
7,1,3039.097561  
7,1,14316.892857  
7,1,2006.119565  
7,1,5948.200000  
7,1,4516.610577  
7,1,4901.756757  
7,1,1617.505435  
7,1,2407.200000  
7,1,11832.231618  
7,1,7231.000000

7,1,17155.480769  
7,1,19409.162500  
7,1,2270.252451  
7,1,3828.295455  
7,1,1532.714286  
7,1,4292.832258  
7,1,2298.159574  
7,1,3856.875000  
7,1,2029.121951  
7,1,3542.531250  
7,1,4712.122396  
7,1,1564.406250  
7,1,8261.356164  
7,1,13604.702128  
7,1,2676.804054  
7,1,15908.704787  
7,1,3806.738372  
7,1,1935.250000  
7,1,2293.428571  
7,1,1533.446875  
7,1,1701.031250  
7,1,13577.540323  
7,1,3150.222222  
7,1,2544.852273  
7,1,6084.463415  
7,1,2399.872642  
7,1,2552.980769  
7,1,2473.800000  
7,1,6876.250000  
7,1,5908.571429  
7,1,9690.485294  
7,1,2748.206522  
7,1,2452.077381  
7,1,2660.035714  
7,1,1790.503378  
7,1,2074.537500  
7,1,1683.983333  
7,1,4879.666667  
7,1,9222.612903  
7,1,3345.212766  
7,1,2256.864865  
7,1,8471.763889  
7,1,1698.703488  
7,1,5713.607143  
7,1,1943.625000  
7,1,3775.416667  
7,1,1894.347222  
7,1,3199.500000  
7,1,8347.304688  
7,1,4154.181250  
7,1,12347.590625  
7,1,4420.016129  
7,1,4393.050532  
7,1,2704.000000  
7,1,1755.401515  
7,1,5100.615385  
7,1,1654.709677  
7,1,15611.256579  
7,1,5523.919118  
7,1,1977.521341  
7,1,2468.656250  
7,1,4329.127907  
7,1,5921.594512  
7,1,2920.653846  
7,1,1509.769231  
7,1,9183.604651

7,1,5547.136364  
7,1,3527.164773  
7,1,2305.782051  
7,1,6783.355769  
7,1,6152.072368  
7,1,1645.562500  
7,1,5338.823529  
7,1,4137.164062  
7,1,4282.645161  
7,1,4885.400000  
7,1,3658.941176  
7,1,2042.322581  
7,1,1601.410714  
7,1,2092.880102  
7,1,15860.608108  
7,1,7603.511111  
7,1,6006.831081  
7,1,4674.940476  
7,1,2199.734375  
7,1,1591.990625  
7,1,2442.773148  
7,1,2848.011628  
7,1,10154.926630  
7,1,1904.416667  
7,1,2765.276596  
7,1,1924.982143  
7,1,4409.772059  
7,1,1632.269022  
7,1,5862.520833  
7,1,1918.027778  
7,1,1568.865854  
7,1,2525.067568  
7,1,2024.526316  
7,1,4212.760870  
7,1,7325.725000  
7,1,1619.130435  
7,1,2729.269231  
7,1,1507.691489  
7,1,2728.850000  
7,1,2084.763889  
7,1,4525.838235  
7,1,1649.889706  
7,1,3127.478723  
7,1,15855.100610  
7,1,2454.772727  
7,1,2792.037500  
7,1,1608.977941  
7,1,2852.928571  
7,1,13806.375000  
7,1,1983.727273  
7,1,3777.078704  
7,1,3384.534091  
7,1,2882.133929  
7,1,3373.461538  
7,1,2512.252976  
7,1,1941.050000  
7,1,1885.011029  
7,1,2470.660714  
7,1,2039.163793  
7,1,5011.878125  
7,1,2755.335366  
7,1,9176.140000  
7,1,13271.454545  
7,1,3428.529412  
7,1,4892.967742  
7,1,6984.541667

7,1,6165.379630  
7,1,9463.446429  
7,1,1558.530172  
7,1,1776.994186  
7,1,1919.140625  
7,1,2633.293919  
7,1,1821.657143  
7,1,4578.015625  
7,1,13124.500000  
7,1,3582.453125  
7,1,6385.076923  
7,1,5046.000000  
7,1,3114.512500  
7,1,1647.212963  
7,1,9356.500000  
7,1,3325.534884  
7,1,1704.808673  
7,1,2457.794872  
7,1,8347.239796  
7,1,2101.074074  
7,1,5696.500000  
7,1,3282.119048  
7,1,1772.877907  
7,1,3837.420732  
7,1,2342.353659  
7,1,4955.274882  
7,1,3741.625000  
7,1,1512.134375  
7,1,4482.319079  
7,1,1554.720109  
7,1,1991.625000  
7,1,3064.331081  
7,1,1872.024390  
7,1,2850.371711  
7,1,5930.627451  
7,1,3243.107143  
7,1,13255.142045  
7,1,5344.631250  
7,1,1963.266129  
7,1,3711.300000  
7,1,16448.756757  
7,1,3020.887500  
7,1,9514.281250  
7,1,1729.169643  
7,1,5960.875000  
7,1,2922.523148  
7,1,9136.835366  
7,1,13807.792969  
7,1,10943.518293  
7,1,2186.220395  
7,1,14786.583333  
7,1,1941.645833  
7,1,1887.439024  
7,1,3042.568182  
7,1,1666.216216  
7,1,5814.835714  
7,1,4005.494186  
7,1,7156.661458  
7,1,2253.113636  
7,1,1873.824324  
7,1,2684.104167  
7,1,1835.537500  
7,1,3471.678571  
7,1,4098.576613  
7,1,1852.024390  
7,1,2865.000000

7,1,3105.330357  
7,1,2435.310811  
7,1,3424.125000  
7,1,1608.426136  
7,1,11062.684211  
7,1,4280.634615  
7,1,2542.562500  
7,1,7201.765152  
7,1,1995.611111  
7,1,1897.036932  
7,1,5271.660714  
7,1,2029.488372  
7,1,1499.666667  
7,1,11047.616071  
7,1,5174.427419  
7,1,4801.045732  
7,1,1519.600000  
7,1,6956.756410  
7,1,7891.830882  
7,1,1961.798387  
7,1,5239.750000  
7,1,1795.617188  
7,1,8923.030405  
7,1,2087.231618  
7,1,2280.357143  
7,1,3666.250000  
7,1,3630.328125  
7,1,3887.230769  
7,1,3875.857143  
7,1,2195.090909  
7,1,1531.505435  
7,1,1947.029605  
7,1,1574.392857  
7,1,5810.730114  
7,1,3963.102941  
7,1,16120.083333  
7,1,14582.894737  
7,1,3521.711111  
7,1,3950.390244  
7,1,2061.080645  
7,1,5554.232143  
7,1,8701.392857  
7,1,2194.216837  
7,1,3020.317308  
7,1,4163.548387  
7,1,9354.916667  
7,1,2276.906250  
7,1,1773.367647  
7,1,5075.651961  
7,1,1881.789062  
7,1,1697.294118  
7,1,3392.100000  
7,1,1749.468085  
7,1,2043.962500  
7,1,8587.327128  
7,1,7886.895349  
7,1,6176.250000  
7,1,1747.207317  
7,1,3178.341463  
7,1,2753.779891  
7,1,9546.137500  
7,1,10088.200000  
7,1,1616.937500  
7,1,18727.633333  
7,1,1568.065217  
7,1,1550.028409

7,1,1921.707143  
7,1,1602.090909  
7,1,4476.963710  
7,1,1909.663043  
7,1,3044.961538  
7,1,13251.000000  
7,1,2013.344371  
7,1,4298.614865  
7,1,3573.913690  
7,1,3292.387019  
7,1,6115.385714  
7,1,5967.939024  
7,1,1520.000000  
7,1,15429.750000  
7,1,2303.517857  
7,1,8274.346154  
7,1,4897.692308  
7,1,2427.291667  
7,1,2671.576389  
7,1,1626.823529  
7,1,9710.191860  
7,1,3531.000000  
7,1,2448.718750  
7,1,10534.887755  
7,1,2539.250000  
7,1,2895.909091  
7,1,4943.348214  
7,1,1611.800000  
7,1,4611.858696  
7,1,7207.549020  
7,1,3198.351064  
7,1,10298.416667  
7,1,4314.980769  
7,1,15968.303030  
7,1,8389.608108  
7,1,3836.055233  
7,1,2578.333333  
7,1,10690.308333  
7,1,7937.228571  
7,1,2578.909884  
7,1,7098.439516  
7,1,17557.928571  
7,1,8929.625000  
7,1,14181.058824  
7,1,1897.625000  
7,1,1952.562500  
7,1,1608.237500  
7,1,9908.838542  
7,1,2271.459459  
7,1,4346.773438  
7,1,2840.692857  
7,1,8498.375000  
7,1,14850.882353  
7,1,1551.215517  
7,1,5848.625000  
7,1,6360.250000  
7,1,3187.803571  
7,1,1771.769231  
7,1,1957.160156  
7,1,2144.312500  
7,1,1601.500000  
7,1,6254.250000  
7,1,3248.700000  
7,1,1723.306452  
7,1,1734.968750  
7,1,6255.132353

7,1,4872.161184  
7,1,1882.757353  
7,1,2208.905405  
7,1,3053.576923  
7,1,8666.046512  
7,1,2150.779070  
7,1,2215.095588  
7,1,1720.809783  
7,1,2431.472561  
7,1,13112.652027  
7,1,5914.893519  
7,1,4830.225806  
7,1,10786.326087  
7,1,4206.900000  
7,1,2198.652778  
7,1,8702.375000  
7,1,1806.038462  
7,1,3954.038194  
7,1,7757.000000  
7,1,10641.427419  
7,1,6510.363636  
7,1,1680.195122  
7,1,1921.120000  
7,1,8027.120833  
7,1,1499.573370  
7,1,1994.637500  
7,1,7683.016304  
7,1,15991.935606  
7,1,3796.236364  
7,1,2907.487805  
7,1,2333.857143  
7,1,2613.163043  
7,1,5598.073171  
7,1,2325.941176  
7,1,1757.619565  
7,1,2881.297619  
7,1,1747.380000  
7,1,5672.982759  
7,1,1725.111111  
7,1,1599.608108  
7,1,7436.442568  
7,1,1875.984375  
7,1,1966.078947  
7,1,7424.778125  
7,1,2300.328947  
7,1,2352.382500  
7,1,2281.259259  
7,1,7092.607143  
7,1,3160.297872  
7,1,2858.391304  
7,1,3150.846591  
7,1,2064.253571  
7,1,1910.520833  
7,1,7734.395833  
7,1,3617.735294  
7,1,2878.985294  
7,1,1890.409677  
7,1,2094.239130  
7,1,1722.250000  
7,1,4333.684211  
7,1,3419.466912  
7,1,1588.299419  
7,1,1632.777500  
7,1,4332.400000  
7,1,5255.321429  
7,1,6087.406250

7,1,7694.105263  
7,1,5556.642500  
7,1,6252.628571  
7,1,1764.328125  
7,1,2492.600000  
7,1,2130.386364  
7,1,2818.689286  
7,1,1647.250000  
7,1,3481.431818  
7,1,10397.851064  
7,1,3592.300000  
7,1,2104.096154  
7,1,5139.222561  
7,1,14124.085366  
7,1,2138.619565  
7,1,4638.660714  
7,1,2370.472222  
7,1,3603.906250  
7,1,2905.127551  
7,1,7884.111111  
7,1,2280.059524  
7,1,2368.272059  
7,1,3419.714286  
7,1,2283.036585  
7,1,4433.918367  
7,1,5610.950000  
7,1,2672.253125  
7,1,2467.479651  
7,1,9945.386111  
7,1,1525.750000  
7,1,1964.736842  
7,1,13105.707317  
7,1,19760.192308  
7,1,3189.630102  
7,1,1538.276596  
7,1,4976.518519  
7,1,1685.032895  
7,1,4847.666667  
7,1,9410.275510  
7,1,3214.826087  
7,1,2640.117647  
7,1,2543.988281  
7,1,6508.699219  
7,1,1529.312500  
7,1,7473.781250  
7,1,3064.347222  
7,1,2802.364865  
7,1,6227.948864  
7,1,2281.828125  
7,1,1831.612903  
7,1,1906.666667  
7,1,2113.426136  
7,1,3579.229839  
7,1,7162.142857  
7,1,2699.625000  
7,1,2322.464286  
7,1,1953.416667  
7,1,17070.687500  
7,1,2318.611111  
7,1,1585.500000  
7,1,7626.216216  
7,1,1945.360119  
7,1,4440.851852  
7,1,2915.250000  
7,1,4274.468085  
7,1,1557.531250

7,1,2125.333333  
7,1,6278.750000  
7,1,3991.403226  
7,1,4595.611979  
7,1,6391.048077  
7,1,7840.802632  
7,1,1583.372283  
7,1,1999.395833  
7,1,1998.378049  
7,1,2990.059524  
7,1,1559.878289  
7,1,5866.868421  
7,1,1863.678191  
7,1,19065.602941  
7,1,1560.788462  
7,1,3580.715909  
7,1,4416.437500  
7,1,17813.756098  
7,1,1690.352273  
7,1,2759.617021  
7,1,5557.266667  
7,1,4751.178977  
7,1,1709.744186  
7,1,3614.625000  
7,1,5239.895000  
7,1,3033.863636  
7,1,13412.650000  
7,1,4940.089286  
7,1,12384.121951  
7,1,6140.500000  
7,1,1500.714286  
7,1,7499.197581  
7,1,6149.189394  
7,1,3312.328125  
7,1,7423.000000  
7,1,5964.666667  
7,1,1854.857143  
7,1,4110.176282  
7,1,16047.365385  
7,1,3898.933333  
7,1,2181.700000  
7,1,8540.576087  
7,1,2783.122222  
7,1,12704.757353  
7,1,2564.125000  
7,1,2798.802632  
7,1,5220.120879  
7,1,6135.578488  
7,1,1860.800000  
7,1,16997.303571  
7,1,5855.096491  
7,1,8670.721591  
7,1,1766.617187  
7,1,1832.346429  
7,1,1522.942857  
7,1,13529.564103  
7,1,8161.083333  
7,1,6850.125000  
7,1,1977.847561  
7,1,2319.130952  
7,1,2938.175000  
7,1,1763.159574  
7,1,4998.852941  
7,1,1548.375000  
7,1,3990.575000  
7,1,7979.937500

7,1,1789.280488  
7,1,4297.837209  
7,1,5238.779412  
7,1,7659.012500  
7,1,2251.625000  
7,1,3692.699387  
7,1,2761.847826  
7,1,1949.166667  
7,1,3803.992857  
7,1,2670.593750  
7,1,2332.500000  
7,1,2668.833333  
7,1,15545.333333  
7,1,4095.857143  
7,1,7183.594512  
7,1,1628.144737  
7,1,2614.100000  
7,1,1893.713235  
7,1,2630.083333  
7,1,3708.630682  
7,1,4561.325000  
7,1,1662.961538  
7,1,2303.017442  
7,1,2840.117647  
7,1,6769.032609  
7,1,1827.483974  
7,1,2711.469697  
7,1,3985.425000  
7,1,7358.687500  
7,1,1548.083333  
7,1,1822.161765  
7,1,2607.022727  
7,1,3806.684783  
7,1,16404.702381  
7,1,13741.707317  
7,1,3949.338235  
7,1,1607.783537  
7,1,2245.713235  
7,1,10197.451613  
7,1,11916.732558  
7,1,1897.750000  
7,1,1673.559028  
7,1,1940.907738  
7,1,6341.875000  
7,1,1540.852941  
7,1,1767.480769  
7,1,18561.466667  
7,1,1871.772727  
7,1,10562.902256  
7,1,6454.052632  
7,1,3157.602941  
7,1,18157.335000  
7,1,3978.074405  
7,1,1669.269737  
7,1,1629.085227  
7,1,3277.914474  
7,1,2569.100000  
7,1,2071.033537  
7,1,6494.671512  
7,1,2507.155488  
7,1,13948.325000  
7,1,2214.593750  
7,1,6733.683511  
7,1,4023.679688  
7,1,2100.830882  
7,1,4078.228814

7,1,2803.975000  
7,1,1559.566667  
7,1,5395.086957  
7,1,5388.611607  
7,1,15973.600000  
7,1,3862.605263  
7,1,4333.375000  
7,1,5936.208333  
7,1,4710.310606  
7,1,5759.250000  
7,1,3496.733871  
7,1,2490.678922  
7,1,3243.966667  
7,1,1532.763587  
7,1,4533.597826  
7,1,2299.450521  
7,1,9227.217857  
7,1,1869.880814  
7,1,4690.218750  
7,1,2949.923077  
7,1,11607.132143  
7,1,2023.338235  
7,1,5969.111111  
7,1,1955.294118  
7,1,1509.861842  
7,1,4906.581731  
7,1,2212.990385  
7,1,2844.000000  
7,1,9536.600000  
7,1,2862.187500  
7,1,3434.402027  
7,1,5836.270270  
7,1,2044.750000  
7,1,12079.756757  
7,1,3247.120370  
7,1,4569.070946  
7,1,2288.307692  
7,1,2589.234375  
7,1,8018.466216  
7,1,2542.819853  
7,1,2136.607143  
7,1,6072.763158  
7,1,1729.080556  
7,1,2582.000000  
7,1,14777.155172  
7,1,1928.687500  
7,1,2048.048780  
7,1,6150.369231  
7,1,11937.920000  
7,1,7119.625000  
7,1,4233.283784  
7,1,4358.333333  
7,1,6963.342500  
7,1,4284.643382  
7,1,1715.057692  
7,1,1709.304878  
7,1,12442.125000  
7,1,2600.037736  
7,1,3219.535714  
7,1,3054.465625  
7,1,5347.012821  
7,1,6652.030303  
7,1,3550.445312  
7,1,5206.042500  
7,1,2934.460227  
7,1,2648.500000

7,1,2421.587500  
7,1,6868.237179  
7,1,1517.397727  
7,1,2635.427632  
7,1,2255.000000  
7,1,2208.231250  
7,1,1867.277778  
7,1,2142.333333  
7,1,2176.789773  
7,1,5287.180147  
7,1,2630.207031  
7,1,3044.732955  
7,1,1784.562500  
7,1,4717.234375  
7,1,5130.030303  
7,1,3721.652027  
7,1,1520.266667  
7,1,2356.372671  
7,1,3573.671875  
7,1,1553.539773  
7,1,6933.000000  
7,1,1725.072581  
7,1,1857.400000  
7,1,3221.019231  
7,1,1863.960526  
7,1,3261.799419  
7,1,1891.958333  
7,1,3065.655405  
7,1,8205.215909  
7,1,2746.473214  
7,1,3690.575581  
7,1,1749.919118  
7,1,1812.145833  
7,1,2149.980000  
7,1,2306.411585  
7,1,3993.705882  
7,1,3502.923077  
7,1,1981.085784  
7,1,7084.408654  
7,1,5113.213415  
7,1,1774.485714  
7,1,5682.612500  
7,1,11487.383333  
7,1,2783.216216  
7,1,2977.442935  
7,1,5013.694853  
7,1,1881.128472  
7,1,3136.553191  
7,1,7026.687500  
7,1,1528.231707  
7,1,4815.462500  
7,1,6984.108108  
7,1,2783.319444  
7,1,2589.401163  
7,1,7909.691176  
7,1,2813.911765  
7,1,3950.906977  
7,1,1986.257353  
7,1,2747.531250  
7,1,4827.306818  
7,1,19014.125000  
7,1,3928.923611  
7,1,3798.833333  
7,1,10046.973214  
7,1,7671.978261  
7,1,1860.562500

7,1,1518.055147  
7,1,1508.366935  
7,1,3437.220588  
7,1,3830.114865  
7,1,5028.463415  
7,1,4983.960227  
7,1,6344.993421  
7,1,2487.310811  
7,1,2670.176136  
7,1,2379.289634  
7,1,2468.629032  
7,1,2155.323171  
7,1,1811.395833  
7,1,17883.525735  
7,1,2284.903846  
7,1,5259.340000  
7,1,2785.416667  
7,1,1819.356383  
7,1,3940.507653  
7,1,1611.000000  
7,1,1602.162500  
7,1,2728.200000  
7,1,17252.750000  
7,1,15224.621951  
7,1,1703.422872  
7,1,2530.413043  
7,1,10099.346154  
7,1,2031.410000  
7,1,9220.142857  
7,1,15176.615625  
7,1,3652.523438  
7,1,1642.264535  
7,1,2804.595238  
7,1,3706.371711  
7,1,13958.369565  
7,1,1740.769231  
7,1,2309.718750  
7,1,7445.443750  
7,1,2433.005682  
7,1,9332.906250  
7,1,3856.225000  
7,1,3763.825000  
7,1,11129.625000  
7,1,16342.926136  
7,1,2311.437500  
7,1,5862.425676  
7,1,11555.000000  
7,1,1949.983871  
7,1,3107.416667  
7,1,2588.413669  
7,1,2342.562500  
7,1,3930.616279  
7,1,1861.000000  
7,1,2033.280488  
7,1,2243.125000  
7,1,4556.561047  
7,1,1970.604651  
7,1,3884.538043  
7,1,3290.559375  
7,1,1857.066667  
7,1,18006.918919  
7,1,2456.801630  
7,1,5685.236842  
7,1,5373.000000  
7,1,8306.323529  
7,1,1909.058140

7,1,3289.109375  
7,1,2708.973958  
7,1,3429.929054  
7,1,2226.170455  
7,1,3034.830000  
7,1,1526.086538  
7,1,8643.512500  
7,1,16246.127660  
7,1,13150.794643  
7,1,3464.812500  
7,1,8412.000000  
7,1,2403.356250  
7,1,2005.500000  
7,1,4403.583333  
7,1,4069.383065  
7,1,8620.125000  
7,1,5717.013889  
7,1,2276.406250  
7,1,3666.977273  
7,1,3605.968750  
7,1,1513.702128  
7,1,1526.191860  
7,1,4406.125000  
7,1,13206.678571  
7,1,7383.636364  
7,1,2654.460784  
7,1,3321.321429  
7,1,1973.000000  
7,1,5874.564286  
7,1,17984.650000  
7,1,13460.334559  
7,1,6428.785714  
7,1,1591.574468  
7,1,1890.841463  
7,1,1763.458333  
7,1,11617.543605  
7,1,1506.800000  
7,1,5142.500000  
7,1,2852.780488  
7,1,15191.246795  
7,1,8347.761719  
7,1,1634.875000  
7,1,15095.909884  
7,1,2070.906250  
7,1,2180.488636  
7,1,9376.714286  
7,1,4165.760870  
7,1,3057.642857  
7,1,13087.288690  
7,1,2544.237245  
7,1,5850.732558  
7,1,6429.250000  
7,1,5650.236111  
7,1,4388.332447  
7,1,2124.274390  
7,1,2028.254902  
7,1,3132.042683  
7,1,3665.850000  
7,1,5761.515625  
7,1,5298.111111  
7,1,2351.372159  
7,1,1721.130952  
7,1,7746.334677  
7,1,4714.911765  
7,1,2871.644737  
7,1,11423.541667

7,1,2933.071429  
7,1,2138.055147  
7,1,4977.291667  
7,1,17469.028125  
7,1,2404.703125  
7,1,12984.356618  
7,1,5636.004630  
7,1,18338.037500  
7,1,1698.993243  
7,1,5343.587500  
7,1,10092.435897  
7,1,10669.682927  
7,1,8582.000000  
7,1,2615.133929  
7,1,7389.072917  
7,1,18719.598485  
7,1,2689.750000  
7,1,1956.500000  
7,1,3406.714286  
7,1,2118.985119  
7,1,1792.812500  
7,1,10482.045455  
7,1,2174.289474  
7,1,5569.987903  
7,1,4980.858108  
7,1,1786.364130  
7,1,5624.890625  
7,1,1751.729730  
7,1,5063.211538  
7,1,2557.231707  
7,1,1724.676471  
7,1,1969.187500  
7,1,3107.312500  
7,1,2117.367500  
7,1,11521.750000  
7,1,2988.296512  
7,1,6263.935484  
7,1,2374.616071  
7,1,6813.789474  
7,1,5689.597656  
7,1,15926.815789  
7,1,5958.888889  
7,1,1517.505435  
7,1,2788.125000  
7,1,8453.715909  
7,1,1540.337838  
7,1,15959.780303  
7,1,2171.750000  
7,1,2744.258333  
7,1,12181.778571  
7,1,6981.939189  
7,1,10523.131410  
7,1,6693.787234  
7,1,4757.713235  
7,1,2466.800000  
7,1,3880.071429  
7,1,2080.250000  
7,1,2098.734756  
7,1,5674.563953  
7,1,5919.500000  
7,1,17733.894737  
7,1,2732.715116  
7,1,5205.935484  
7,1,11303.395270  
7,1,4124.583333  
7,1,3643.882143

7,1,1567.602273  
7,1,5282.187500  
7,1,6959.464286  
7,1,2487.143750  
7,1,2445.031250  
7,1,6357.016129  
7,1,3284.205357  
7,1,9149.388889  
7,1,1656.155556  
7,1,2546.093750  
7,1,3929.980769  
7,1,2244.272727  
7,1,9963.500000  
7,1,2037.162162  
7,1,3718.565476  
7,1,3876.117188  
7,1,2055.802632  
7,1,3778.483553  
7,1,1847.048295  
7,1,3131.235294  
7,1,2111.712838  
7,1,2966.479167  
7,1,4837.121622  
7,1,3018.492647  
7,1,5297.527778  
7,1,3761.365854  
7,1,12357.653409  
7,1,3031.760000  
7,1,2149.788043  
7,1,5765.384615  
7,1,1938.890244  
7,1,6854.147059  
7,1,5301.312500  
7,1,2416.467262  
7,1,4395.810976  
7,1,2482.090909  
7,1,4392.846774  
7,1,8268.588235  
7,1,2384.472561  
7,1,7235.717742  
7,1,1509.680556  
7,1,4365.100000  
7,1,4804.948529  
7,1,8822.510417  
7,1,3717.400000  
7,1,3565.221591  
7,1,18679.666667  
7,1,1506.211538  
7,1,2482.762500  
7,1,5893.042683  
7,1,4846.672414  
7,1,2376.850000  
7,1,1939.250000  
7,1,3677.176471  
7,1,13309.788306  
7,1,2127.846154  
7,1,3528.572917  
7,1,13377.647727  
7,1,1573.312500  
7,1,2017.581395  
7,1,8021.850490  
7,1,1713.153061  
7,1,2378.390625  
7,1,6003.743902  
7,1,6376.378049  
7,1,16578.566667

7,1,2717.067073  
7,1,3349.191176  
7,1,4401.522436  
7,1,5677.875000  
7,1,4165.183333  
7,1,15562.841667  
7,1,10753.678571  
7,1,1995.497159  
7,1,7006.178571  
7,1,2055.893293  
7,1,3365.207317  
7,1,4840.100000  
7,1,1626.571429  
7,1,5013.281250  
7,1,1585.509804  
7,1,5235.702381  
7,1,3051.625000  
7,1,5321.594512  
7,1,9999.228659  
7,1,3667.272727  
7,1,3429.715000  
7,1,1900.207317  
7,1,1741.279070  
7,1,2264.216146  
7,1,1530.317073  
7,1,7791.939024  
7,1,4124.833333  
7,1,8053.750000  
7,1,6825.182927  
7,1,2247.612069  
7,1,2586.184375  
7,1,14322.000000  
7,1,6357.125000  
7,1,9386.755435  
7,1,1983.725610  
7,1,3070.609756  
7,1,16951.184091  
7,1,8412.803977  
7,1,4237.484848  
7,1,1695.351351  
7,1,4067.934659  
7,1,6743.065104  
7,1,2354.891026  
7,1,4976.282609  
7,1,6361.320000  
7,1,3323.791667  
7,1,4908.090909  
7,1,4561.250000  
7,1,2384.648148  
7,1,1540.583333  
7,1,7348.518750  
7,1,2989.938776  
7,1,2641.527439  
7,1,3344.477273  
7,1,2939.340909  
7,1,1509.490196  
7,1,2985.666667  
7,1,5778.861702  
7,1,1959.402344  
7,1,1985.939189  
7,1,2250.259615  
7,1,2218.937500  
7,1,2018.582237  
7,1,8748.162791  
7,1,2206.202381  
7,1,3518.875000

7,1,2993.460938  
7,1,3250.211111  
7,1,1560.023256  
7,1,2667.635417  
7,1,1754.934783  
7,1,6220.648810  
7,1,1567.585366  
7,1,4644.416667  
7,1,2305.865854  
7,1,1633.928571  
7,1,2547.884615  
7,1,1694.153846  
7,1,2798.234375  
8,2,1888.666667  
8,2,2259.533019  
8,2,3831.075000  
8,2,2146.000000  
8,2,2507.277778  
8,2,1996.078125  
8,2,2264.918605  
8,2,1843.485294  
8,2,2394.034091  
8,2,2148.270000  
8,2,1902.187500  
8,2,2166.362805  
8,2,1521.225000  
8,2,1948.940476  
8,2,2198.679688  
8,2,2304.915094  
8,2,13322.715909  
8,2,1499.734756  
8,2,1861.539063  
8,2,3324.317568  
8,2,1610.539773  
8,2,1706.953488  
8,2,2215.076923  
8,2,4711.083333  
8,2,3669.213068  
8,2,1540.064024  
8,2,2789.311111  
8,2,2016.020408  
8,2,2153.262755  
8,2,1653.668605  
8,2,3475.875000  
8,2,1548.462963  
8,2,2047.731250  
8,2,2312.125000  
8,2,2043.098684  
8,2,2725.199468  
8,2,2152.545455  
8,2,3108.620968  
8,2,1704.352273  
8,2,1699.520833  
8,2,2534.303571  
8,2,2521.209375  
8,2,3167.867347  
8,2,2264.760776  
8,2,2800.000000  
8,2,1528.139665  
8,2,2193.125000  
8,2,1581.693452  
8,2,2129.014706  
8,2,1776.965116  
8,2,3191.901961  
8,2,2196.403509  
8,2,12983.453125

8,2,2127.122093  
8,2,1700.730769  
8,2,2599.640000  
8,2,2797.294118  
8,2,1784.000000  
8,2,2068.711538  
8,2,6505.700000  
8,2,1618.697115  
8,2,1797.842391  
8,2,1738.797222  
8,2,1818.333333  
8,2,3196.851190  
8,2,2427.202381  
8,2,2854.853261  
8,2,4398.765306  
8,2,2135.926829  
8,2,1654.117188  
8,2,3516.609375  
8,2,3508.395833  
8,2,2113.996212  
8,2,4521.768116  
8,2,3427.328431  
8,2,3192.823529  
8,2,2343.630435  
8,2,6514.903846  
8,2,2031.700000  
8,2,1534.000000  
8,2,2080.069149  
8,2,1997.627717  
8,2,3054.029070  
8,2,2627.109375  
8,2,1502.429825  
8,2,1899.807692  
8,2,2884.910000  
8,2,1757.788462  
8,2,1777.951531  
8,2,3817.369048  
8,2,2248.184659  
8,2,2323.534091  
8,2,2336.323718  
8,2,5301.026786  
8,2,1778.416667  
8,2,1793.625000  
8,2,1846.541667  
8,2,1889.838415  
8,2,1661.809783  
8,2,2593.581250  
8,2,1710.982143  
8,2,2426.316038  
8,2,2704.583333  
8,2,1638.689103  
8,2,1705.679487  
8,2,1679.680851  
8,2,2490.130435  
8,2,1727.176829  
8,2,1891.562500  
8,2,2125.335938  
8,2,1653.875000  
8,2,1894.238636  
8,2,1511.871622  
8,2,3116.050595  
8,2,2223.543478  
8,2,1557.511111  
8,2,3592.638298  
8,2,3432.600000  
8,2,2336.613208

8,2,1565.337500  
8,2,1961.166667  
8,2,1966.500000  
8,2,2236.081522  
8,2,1704.281250  
8,2,1969.952128  
8,2,3944.486486  
8,2,2227.904255  
8,2,2163.923077  
8,2,1832.790865  
8,2,3351.538043  
8,2,1808.341837  
8,2,3624.409091  
8,2,1688.950000  
8,2,2976.820000  
8,2,2027.625000  
8,2,7451.288462  
8,2,4397.532407  
8,2,1693.212766  
8,2,2905.851064  
8,2,2808.394737  
8,2,1893.569767  
8,2,2384.846154  
8,2,2263.952830  
8,2,1580.175000  
8,2,1647.320313  
8,2,3246.787791  
8,2,1659.250000  
8,2,3443.563830  
8,2,1831.521875  
8,2,1796.578947  
8,2,1575.159091  
8,2,2347.846154  
8,2,1819.083333  
8,2,7425.458333  
8,2,1855.200000  
8,2,2156.416667  
8,2,2037.990909  
8,2,1896.777027  
8,2,2835.670000  
8,2,1839.171569  
8,2,1881.060000  
8,2,3297.565476  
8,2,1908.533333  
8,2,2712.711310  
8,2,4686.750000  
8,2,3750.391304  
8,2,2058.197917  
8,2,1515.956522  
8,2,5417.113971  
8,2,3752.846154  
8,2,14705.000000  
8,2,5017.724490  
8,2,1589.192708  
8,2,2259.287234  
8,2,2622.075581  
8,2,1598.889423  
8,2,2330.103659  
8,2,6642.598802  
8,2,5543.811508  
8,2,1781.265306  
8,2,4226.058824  
8,2,1654.579545  
8,2,1610.775000  
8,2,1564.900000  
8,2,2479.799020

8,2,1525.479167  
8,2,1699.437173  
8,2,1571.181818  
8,2,2551.235294  
8,2,11639.977564  
8,2,5131.555000  
8,2,1867.385417  
8,2,1563.900000  
8,2,1768.040000  
8,2,2213.085714  
8,2,1656.926829  
8,2,2036.307065  
8,2,1711.077778  
8,2,1895.312500  
8,2,2855.350877  
8,2,2146.250000  
8,2,1994.686170  
8,2,2075.232143  
8,2,1914.208333  
8,2,1716.894231  
8,2,1608.400000  
8,2,1517.744565  
8,2,1563.375000  
8,2,1725.148256  
8,2,2161.847561  
8,2,1566.717949  
8,2,1929.668605  
8,2,6410.784574  
8,2,2232.750000  
8,2,2665.650000  
8,2,5406.230769  
8,2,3432.000000  
8,2,1814.331633  
8,2,2397.197917  
8,2,1992.722222  
8,2,3083.595238  
8,2,2821.540000  
8,2,1745.292763  
8,2,1533.665816  
8,2,1831.115385  
8,2,3068.802273  
8,2,1707.750000  
8,2,4893.409722  
8,2,1678.777174  
8,2,2673.781863  
8,2,1860.461538  
8,2,2942.202381  
8,2,1738.191489  
8,2,1905.964286  
8,2,4325.551020  
8,2,2302.567308  
8,2,4455.093023  
8,2,1900.154412  
8,2,1663.174342  
8,2,2402.386905  
8,2,1740.045000  
8,2,2533.257500  
8,2,1646.048469  
8,2,2292.169118  
8,2,2450.210227  
8,2,1856.771429  
8,2,2505.584906  
8,2,1726.575342  
8,2,1794.815341  
8,2,1511.083333  
8,2,7281.795918

8,2,1828.670673  
8,2,2871.461538  
8,2,1664.803571  
8,2,2099.801724  
8,2,3814.311258  
8,2,1937.088235  
8,2,3924.563679  
8,2,2158.000000  
8,2,2395.950980  
8,2,3451.511364  
8,2,1975.343750  
8,2,1786.519444  
8,2,2501.775510  
8,2,1871.272727  
8,2,4796.553571  
8,2,3281.404255  
8,2,6958.598214  
8,2,3853.828804  
8,2,2011.121951  
8,2,1868.096591  
8,2,2213.380000  
8,2,1732.339623  
8,2,2614.511905  
8,2,1627.569149  
8,2,1608.152778  
8,2,2030.607143  
8,2,2792.892857  
8,2,3752.118902  
8,2,1586.589286  
8,2,1574.257812  
8,2,6983.735849  
8,2,1779.524038  
8,2,2348.238426  
8,2,2750.904412  
8,2,1737.822917  
8,2,2045.465116  
8,2,3776.829787  
8,2,4227.462500  
8,2,2653.258333  
8,2,2114.447115  
8,2,1761.453125  
8,2,2689.307692  
8,2,2855.537500  
8,2,1864.394737  
8,2,2106.607843  
8,2,2012.312500  
8,2,2091.313776  
8,2,2792.387755  
8,2,1521.250000  
8,2,1724.375000  
8,2,2145.860000  
8,2,7062.000000  
8,2,1564.610465  
8,2,1719.079268  
8,2,4708.981771  
8,2,6648.079545  
8,2,1828.125000  
8,2,2285.636364  
8,2,3523.890957  
8,2,2590.625000  
8,2,3170.461538  
8,2,2838.800595  
8,2,1795.310976  
8,2,2477.323171  
8,2,2372.500000  
8,2,1633.304487

8,2,2502.881410  
8,2,2189.569767  
8,2,2503.750000  
8,2,5191.204545  
8,2,3685.250000  
8,2,1799.421875  
8,2,1579.189189  
8,2,3122.000000  
8,2,3265.059783  
8,2,1595.691667  
8,2,4409.854167  
8,2,3034.490741  
8,2,1589.000000  
8,2,3121.272727  
8,2,2027.390000  
8,2,2449.062500  
8,2,1790.406977  
8,2,2320.910714  
8,2,1931.792453  
8,2,4056.800000  
8,2,1695.088068  
8,2,4198.375000  
8,2,4687.036458  
8,2,10529.442568  
8,2,1839.789474  
8,2,2950.494681  
8,2,1768.147059  
8,2,1563.760417  
8,2,2288.060000  
8,2,1582.463068  
8,2,9149.335106  
8,2,1533.000000  
8,2,1776.184659  
8,2,1500.371795  
8,2,2354.673913  
8,2,3371.735577  
8,2,2655.560976  
8,2,1554.325581  
8,2,2464.307143  
8,2,3046.997159  
8,2,2417.875000  
8,2,6104.122449  
8,2,1771.744898  
8,2,1612.208333  
8,2,6028.119565  
8,2,1834.795918  
8,2,3411.078488  
8,2,4771.539474  
8,2,4119.604167  
8,2,2364.984756  
8,2,3001.745283  
8,2,2750.486413  
8,2,2129.090909  
8,2,1597.943878  
8,2,3507.500000  
8,2,14082.235294  
8,2,2489.288889  
8,2,2314.558824  
8,2,2877.134228  
8,2,2112.990132  
8,2,4620.849490  
8,2,17889.000000  
8,2,1655.945755  
8,2,1814.031977  
8,2,1652.712766  
8,2,3680.561224

8,2,3861.722222  
8,2,2222.746988  
8,2,1802.471698  
8,2,1665.697674  
8,2,2073.528302  
8,2,1650.187500  
8,2,1527.827273  
8,2,2066.632653  
8,2,1983.969388  
8,2,2660.315000  
8,2,1800.303571  
8,2,2037.212766  
8,2,1564.565789  
8,2,4839.810185  
8,2,1728.750000  
8,2,2366.666667  
8,2,1521.857143  
8,2,1692.820312  
8,2,1811.000000  
8,2,1630.562500  
8,2,5484.978261  
8,2,1518.680921  
8,2,2725.907143  
8,2,1649.279412  
8,2,3170.927215  
8,2,2887.685484  
8,2,1774.197500  
8,2,1836.829384  
8,2,3943.769784  
8,2,1744.132353  
8,2,1681.858025  
8,2,3923.147727  
8,2,5597.182927  
8,2,1637.279255  
8,2,2304.264151  
8,2,7821.218750  
8,2,1910.354592  
8,2,2051.100000  
8,2,2735.277778  
8,2,2168.211538  
8,2,1622.940909  
8,2,2108.026163  
8,2,3206.906250  
8,2,1858.591837  
8,2,1903.423077  
8,2,1765.742925  
8,2,8140.052632  
8,2,1639.215000  
8,2,1785.823529  
8,2,2140.000000  
8,2,3478.654255  
8,2,2054.301136  
8,2,3451.025000  
8,2,3260.043367  
8,2,3145.574468  
8,2,1547.597561  
8,2,1577.512195  
8,2,1551.500000  
8,2,2732.757353  
8,2,3604.017442  
8,2,2460.831395  
8,2,4753.269737  
8,2,2156.993750  
8,2,2716.709091  
8,2,1656.706422  
8,2,4351.593750

8,2,2498.142857  
8,2,1928.102941  
8,2,2112.531250  
8,2,1948.202500  
8,2,1604.546512  
8,2,1893.554348  
8,2,5126.509434  
8,2,2708.584906  
8,2,2876.138122  
8,2,1830.846591  
8,2,1952.900000  
8,2,4412.611111  
8,2,3429.919643  
8,2,1829.213068  
8,2,12280.382353  
8,2,2996.272059  
8,2,3573.505000  
8,2,2186.380000  
8,2,1906.317308  
8,2,2231.888889  
8,2,1515.381757  
8,2,1780.631579  
8,2,1711.928571  
8,2,1506.192935  
8,2,1840.062500  
8,2,2125.718750  
8,2,1516.095930  
8,2,2627.491071  
8,2,2538.803571  
8,2,2993.792683  
8,2,1531.738372  
8,2,1509.236842  
8,2,6907.717949  
8,2,5514.212766  
8,2,8661.827586  
8,2,4722.411765  
8,2,1639.734694  
8,2,2912.868421  
8,2,1621.679688  
8,2,1931.940625  
8,2,5112.590000  
8,2,11432.023438  
8,2,1682.250000  
8,2,1902.597500  
8,2,5828.283163  
8,2,1950.568627  
8,2,2341.526786  
8,2,2599.541667  
8,2,1945.302500  
8,2,1604.642857  
8,2,4323.990625  
8,2,1524.466837  
8,2,1703.833333  
8,2,2535.836310  
8,2,3888.013514  
8,2,3411.731132  
8,2,2450.596591  
8,2,2243.593750  
8,2,5226.294643  
8,2,4899.729730  
8,2,1526.353659  
8,2,1575.387500  
8,2,1946.414634  
8,2,4265.955556  
8,2,1666.205357  
8,2,4357.300439

8,2,1999.857143  
8,2,1889.700893  
8,2,2241.550000  
8,2,1879.767442  
8,2,2403.665761  
8,2,2070.316038  
8,2,2584.758152  
8,2,5912.800000  
8,2,1790.310976  
8,2,2566.437500  
8,2,1649.611111  
8,2,1644.780000  
8,2,2826.197368  
8,2,1872.487179  
8,2,2609.480114  
8,2,3761.182065  
8,2,2152.780405  
8,2,1589.818182  
8,2,2938.955882  
8,2,1603.714286  
8,2,7809.510000  
8,2,2727.671875  
8,2,1625.861979  
8,2,2052.447917  
8,2,2418.437500  
8,2,3126.974265  
8,2,5020.143750  
8,2,2210.500000  
8,2,1788.726744  
8,2,1774.312500  
8,2,1777.875000  
8,2,3221.879870  
8,2,1787.378205  
8,2,1785.676724  
8,2,2615.847222  
8,2,2248.562500  
8,2,1895.336735  
8,2,1565.037736  
8,2,1725.621951  
8,2,2176.034884  
8,2,2063.950000  
8,2,4150.620192  
8,2,1743.604167  
8,2,1911.841463  
8,2,2791.750000  
8,2,1604.772222  
8,2,1648.279605  
8,2,1605.595588  
8,2,1927.397059  
8,2,2107.543367  
8,2,1545.687500  
8,2,4314.750000  
8,2,1774.342105  
8,2,4510.083333  
8,2,3145.838415  
8,2,1636.568182  
8,2,1632.588235  
8,2,2185.536585  
8,2,2353.531250  
8,2,1723.902439  
8,2,1599.250000  
8,2,1610.100000  
8,2,1860.565789  
8,2,8928.963235  
8,2,2133.745000  
8,2,3497.729167

8,2,5569.264286  
8,2,15261.250000  
8,2,2371.590909  
8,2,2043.864583  
8,2,1707.961538  
8,2,1946.068627  
8,2,1928.098404  
8,2,1744.826389  
8,2,2027.064904  
8,2,2774.812500  
8,2,2268.492857  
8,2,2351.304054  
8,2,1615.071429  
8,2,8750.214286  
8,2,12502.296053  
8,2,4799.000000  
8,2,2133.869565  
8,2,3351.265306  
8,2,1503.851064  
8,2,1870.720000  
8,2,1519.311047  
8,2,3424.543103  
8,2,2609.107143  
8,2,1574.100000  
8,2,2419.812500  
8,2,14327.513158  
8,2,2934.060000  
8,2,1832.328125  
8,2,2388.986111  
8,2,1817.220000  
8,2,1540.795732  
8,2,3506.670455  
8,2,1559.383721  
8,2,2719.358333  
8,2,1615.917500  
8,2,1557.121711  
8,2,3386.514286  
8,2,1706.015957  
8,2,2805.986979  
8,2,6273.855978  
8,2,1533.070000  
8,2,7324.095238  
8,2,2035.801020  
8,2,1951.854167  
8,2,2804.153846  
8,2,3874.905405  
8,2,1785.676829  
8,2,2187.497845  
8,2,2485.347500  
8,2,4018.437500  
8,2,1708.822115  
8,2,5447.372024  
8,2,2601.711538  
8,2,1915.258065  
8,2,3060.571429  
8,2,2787.542683  
8,2,1583.687500  
8,2,4113.666667  
8,2,1633.079861  
8,2,2105.160000  
8,2,3399.906250  
8,2,2601.795455  
8,2,8079.500000  
8,2,1681.817500  
8,2,2272.186170  
8,2,1604.919872

8,2,6051.290000  
8,2,1845.662234  
8,2,2171.081522  
8,2,2147.750000  
8,2,1655.859375  
8,2,1863.809783  
8,2,1794.485417  
8,2,3952.334302  
8,2,1834.725962  
8,2,1611.836957  
8,2,1979.719298  
8,2,1846.608696  
8,2,1607.583333  
8,2,3262.000000  
8,2,1948.375000  
8,2,1672.715625  
8,2,3270.194444  
8,2,1740.350000  
8,2,1521.463542  
8,2,3102.714286  
8,2,2133.976744  
8,2,1639.122283  
8,2,2542.571875  
8,2,1884.804878  
8,2,4088.270833  
8,2,2063.144737  
8,2,2006.557432  
8,2,2992.082317  
8,2,4244.191176  
8,2,1916.676471  
8,2,1991.381098  
8,2,2242.081967  
8,2,1624.760204  
8,2,2450.038462  
8,2,1730.283537  
8,2,5034.250000  
8,2,3487.142857  
8,2,3711.045833  
8,2,5848.652174  
8,2,1590.744898  
8,2,1557.691860  
8,2,2271.186170  
8,2,1643.677500  
8,2,3030.571429  
8,2,2003.598214  
8,2,1653.397959  
8,2,1531.392857  
8,2,1750.524390  
8,2,2377.687500  
8,2,1683.385870  
8,2,3514.365000  
8,2,1594.945122  
8,2,2281.558511  
8,2,2799.610119  
8,2,3425.347500  
8,2,1610.252907  
8,2,5424.750000  
8,2,1679.683673  
8,2,3218.986014  
8,2,1745.962264  
8,2,1590.072727  
8,2,1528.760000  
8,2,3564.950581  
8,2,1745.854651  
8,2,4140.704545  
8,2,1793.750000

8,2,16153.472973  
8,2,2452.416667  
8,2,3309.990000  
8,2,4058.169118  
8,2,1891.673077  
8,2,1691.000000  
8,2,5202.840909  
8,2,2507.234375  
8,2,12781.882353  
8,2,1889.153302  
8,2,1804.195000  
8,2,1529.891304  
8,2,2498.447115  
8,2,2558.500000  
8,2,2847.604167  
8,2,1752.321875  
8,2,2840.733333  
8,2,1514.016129  
8,2,1928.936275  
8,2,2774.480769  
8,2,1801.882653  
8,2,3068.129310  
8,2,1928.671875  
8,2,1720.758475  
8,2,1668.444444  
8,2,4743.842105  
8,2,1684.888393  
8,2,1594.892157  
8,2,2789.601562  
8,2,1515.614130  
8,2,2402.090909  
8,2,1641.545455  
8,2,1642.338710  
8,2,1705.348168  
8,2,1704.000000  
8,2,3640.671875  
8,2,2785.426829  
8,2,1942.597222  
8,2,1805.909091  
8,2,1908.318548  
8,2,1583.741848  
8,2,2578.042683  
8,2,6661.015152  
8,2,3410.500000  
8,2,1773.897059  
8,2,2753.767241  
8,2,1620.895000  
8,2,1579.500000  
8,2,8861.196429  
8,2,1898.316667  
8,2,1859.264706  
8,2,1840.388889  
8,2,3902.506098  
8,2,3564.000000  
8,2,1766.067308  
8,2,1571.040865  
8,2,1627.152174  
8,2,1745.510000  
8,2,3581.691038  
8,2,1540.440217  
8,2,3849.411932  
8,2,1778.718750  
8,2,11051.059375  
8,2,2144.483333  
8,2,2818.530612  
8,2,3830.162791

8,2,2382.130000  
8,2,3036.494048  
8,2,3028.946875  
8,2,5779.517361  
8,2,1887.000000  
8,2,1515.260204  
8,2,3760.791667  
8,2,2397.000000  
8,2,2267.821429  
8,2,1587.551471  
8,2,2662.030405  
8,2,2070.081633  
8,2,13591.399038  
8,2,1913.165625  
8,2,2009.500000  
8,2,2659.125000  
8,2,2664.791667  
8,2,3765.271277  
8,2,3944.694079  
8,2,2036.546512  
8,2,1507.572917  
8,2,1821.726974  
8,2,1663.000000  
8,2,2589.232143  
8,2,1577.645349  
8,2,1503.939394  
8,2,5753.892857  
8,2,2078.320000  
8,2,1771.645833  
8,2,1719.470588  
8,2,3717.235577  
8,2,3130.642361  
8,2,5363.725000  
8,2,1916.763158  
8,2,1770.350000  
8,2,2032.739130  
8,2,3496.773438  
8,2,2369.250000  
8,2,16612.153846  
8,2,2503.495000  
8,2,1503.454545  
8,2,1756.437500  
8,2,1789.256410  
8,2,4921.666667  
8,2,3556.630319  
8,2,1737.479167  
8,2,1626.953704  
8,2,2059.881818  
8,2,3137.565217  
8,2,1742.288462  
8,2,1628.823864  
8,2,1500.105556  
8,2,2285.309524  
8,2,1789.250000  
8,2,1944.870192  
8,2,2119.152778  
8,2,2466.994444  
8,2,1828.734375  
8,2,1940.857759  
8,2,3720.560811  
8,2,3311.919118  
8,2,3308.972826  
8,2,1635.716216  
8,2,5383.500000  
8,2,2337.138298  
8,2,3794.500000

8,2,1793.636161  
8,2,2418.507143  
8,2,2034.739796  
8,2,1606.154605  
8,2,2142.266667  
8,2,2738.038043  
8,2,1591.363636  
8,2,2005.130000  
8,2,1954.397727  
8,2,1614.387755  
8,2,2347.790698  
8,2,2589.755435  
8,2,1556.289062  
8,2,2248.795000  
8,2,1718.061475  
8,2,2720.308333  
8,2,5026.601744  
8,2,4374.125000  
8,2,1984.841837  
8,2,1832.984375  
8,2,1538.540698  
8,2,1657.921196  
8,2,1979.744186  
8,2,3256.431452  
8,2,2910.496622  
8,2,2471.030726  
8,2,1923.926829  
8,2,3513.591837  
8,2,1744.008523  
8,2,2330.200000  
8,2,2217.928191  
8,2,1785.383929  
8,2,1611.607143  
8,2,2789.406977  
8,2,2651.430147  
8,2,1980.035714  
8,2,3010.357955  
8,2,1767.522222  
8,2,2010.000000  
8,2,2742.806122  
8,2,3152.375000  
8,2,1606.537162  
8,2,2164.027778  
8,2,6417.202381  
8,2,1870.083333  
8,2,2705.885204  
8,2,3033.730000  
8,2,2050.091837  
8,2,1513.655405  
8,2,2399.717391  
8,2,1865.968750  
8,2,1557.907738  
8,2,2626.630682  
8,2,2288.399038  
8,2,3395.260000  
8,2,2393.880435  
8,2,1508.809211  
8,2,1745.731383  
8,2,1834.000000  
8,2,4259.146341  
8,2,1694.994444  
8,2,2566.988024  
8,2,2000.679348  
8,2,1636.609375  
8,2,1950.161765  
8,2,1746.080556

8,2,1908.166667  
8,2,2063.316327  
8,2,1706.538889  
8,2,1615.500000  
8,2,1743.960000  
8,2,3379.427885  
8,2,2874.773585  
8,2,3568.310976  
8,2,2201.704327  
8,2,10853.410256  
8,2,1597.523810  
8,2,1857.411765  
8,2,1523.888889  
8,2,3355.709302  
8,2,2638.641026  
8,2,3272.895833  
8,2,1517.205000  
8,2,4454.937500  
8,2,1662.323529  
8,2,1713.895833  
8,2,4870.480000  
8,2,1792.156863  
8,2,5423.707317  
8,2,16001.381443  
8,2,2002.875000  
8,2,1720.847500  
8,2,1705.593750  
8,2,1553.026786  
8,2,2728.678191  
8,2,2565.942500  
8,2,2360.386364  
8,2,3566.543478  
8,2,3016.703804  
8,2,9063.133333  
8,2,2576.882353  
8,2,2618.272222  
8,2,1503.924107  
8,2,2739.394619  
8,2,3047.031250  
8,2,2232.375000  
8,2,2013.602941  
8,2,4426.562500  
8,2,3569.562500  
8,2,3354.040000  
8,2,3565.601293  
8,2,3344.648837  
8,2,1618.329545  
8,2,2404.691617  
8,2,2481.805556  
8,2,1523.406250  
8,2,1771.266026  
8,2,1515.571429  
8,2,2009.977273  
8,2,2788.860465  
8,2,2260.857843  
8,2,2954.988372  
8,2,1638.265957  
8,2,2000.022727  
8,2,1835.228571  
8,2,1751.410256  
8,2,1797.636364  
8,2,2056.326087  
8,2,1650.567568  
8,2,2069.205128  
8,2,3147.328125  
8,2,1794.884146

8,2,1989.296512  
8,2,2432.326531  
8,2,1931.386628  
8,2,1769.173913  
8,2,2234.281915  
8,2,5802.075521  
8,2,1847.005814  
8,2,1940.391827  
8,2,1588.845395  
8,2,2242.630435  
8,2,1865.570312  
8,2,3605.932203  
8,2,2111.235000  
8,2,1616.460937  
8,2,2275.984375  
8,2,1990.424528  
8,2,2331.800000  
8,2,2229.162109  
8,2,1961.915761  
8,2,3139.005102  
8,2,7882.550676  
8,2,1940.000000  
8,2,1944.550595  
8,2,1591.368304  
8,2,3245.117647  
8,2,2673.984091  
8,2,1736.239130  
8,2,1909.750000  
8,2,1647.815625  
8,2,1806.058594  
8,2,4981.117647  
8,2,2189.456522  
8,2,3070.671498  
8,2,1547.489130  
8,2,1577.500000  
8,2,2400.607843  
8,2,6909.513636  
8,2,3840.500000  
8,2,2387.500000  
8,2,1518.918367  
8,2,3440.139423  
8,2,3069.647727  
8,2,1620.144737  
8,2,1719.045918  
8,2,1616.868750  
8,2,4338.694444  
8,2,2046.100000  
8,2,3264.920732  
8,2,1632.288462  
8,2,3254.382653  
8,2,2711.262500  
8,2,2345.781250  
8,2,1805.809211  
8,2,2116.744186  
8,2,1750.208333  
8,2,2116.135204  
8,2,2951.946429  
8,2,2100.202128  
8,2,2772.923780  
8,2,1955.562500  
8,2,2641.321429  
8,2,2230.811224  
8,2,2911.701531  
8,2,1902.875000  
8,2,2227.218750  
8,2,2778.073529

8,2,1809.142857  
8,2,1552.383929  
8,2,3506.647959  
8,2,1546.133721  
8,2,3668.414062  
8,2,9444.789474  
8,2,1756.478448  
8,2,1825.286585  
8,2,1974.721591  
8,2,1855.812500  
8,2,2522.020833  
8,2,6773.479167  
8,2,1840.058140  
8,2,1811.074468  
8,2,3500.196429  
8,2,1826.980769  
8,2,3981.910714  
8,2,1526.940217  
8,2,2026.803571  
8,2,2626.460938  
8,2,2953.100000  
8,2,1891.079787  
8,2,1609.194767  
8,2,2029.882979  
8,2,2274.842105  
8,2,2937.363636  
8,2,2546.750000  
8,2,9797.391667  
8,2,12678.000000  
8,2,2785.757353  
8,2,1890.918919  
8,2,2572.213816  
8,2,1873.202381  
8,2,1795.076531  
8,2,1720.391509  
8,2,2779.703431  
8,2,1838.325000  
8,2,3965.605000  
8,2,2033.004902  
8,2,2037.625000  
8,2,2214.717105  
8,2,3674.430233  
8,2,1777.875000  
8,2,3289.303030  
8,2,17355.100000  
8,2,1764.515000  
8,2,2375.573529  
8,2,1652.629032  
8,2,1652.875000  
8,2,1996.347826  
8,2,1667.482759  
8,2,1886.000000  
8,2,1538.680288  
8,2,3402.375000  
8,2,2329.522599  
8,2,1512.075377  
8,2,2084.661765  
8,2,1700.042553  
8,2,4632.546875  
8,2,1510.080769  
8,2,1769.132075  
8,2,2434.857143  
8,2,5575.977564  
8,2,1827.165644  
8,2,2089.517857  
8,2,2217.210526

8,2,3586.065000  
8,2,1579.555147  
8,2,1776.585366  
8,2,1921.856250  
8,2,1648.429487  
8,2,1782.914894  
8,2,3347.821429  
8,2,1863.937500  
8,2,1970.403846  
8,2,2089.006250  
8,2,2523.122159  
8,2,2953.718750  
8,2,1864.887500  
8,2,2070.616279  
8,2,1951.199468  
8,2,5258.600000  
8,2,2126.232143  
8,2,1978.265306  
8,2,2228.342262  
8,2,2490.960784  
8,2,1670.698864  
8,2,2590.693878  
8,2,2627.866667  
8,2,2461.575000  
8,2,1827.232143  
8,2,2565.491071  
8,2,1683.136029  
8,2,1511.615385  
8,2,1804.702703  
8,2,2339.202128  
8,2,1672.353261  
8,2,2291.390244  
8,2,2613.979167  
8,2,2654.960000  
8,2,1542.627451  
8,2,3956.646341  
8,2,1649.594512  
8,2,4488.665323  
8,2,2259.413889  
8,2,1992.605442  
8,2,3152.000000  
8,2,1660.922222  
8,2,4689.010870  
8,2,4091.771277  
8,2,2803.500000  
8,2,1715.527027  
8,2,2958.828947  
8,2,1929.140625  
8,2,1553.635135  
8,2,1644.569767  
8,2,4645.964286  
8,2,2674.865854  
8,2,2385.427778  
8,2,2129.698718  
8,2,1573.415761  
8,2,2696.750000  
8,2,2536.637755  
8,2,1559.361111  
8,2,2038.566860  
8,2,1657.887500  
8,2,1589.357955  
8,2,1625.063830  
8,2,1568.906977  
8,2,7067.883929  
8,2,2186.460000  
8,2,1542.690341

8,2,1858.407609  
8,2,1598.471774  
8,2,2155.500000  
8,2,1978.434783  
8,2,2208.281250  
8,2,2509.194444  
8,2,1556.023810  
8,2,1760.109043  
8,2,4042.058824  
8,2,4068.397436  
8,2,2063.339286  
8,2,2118.041667  
8,2,3222.804348  
8,2,1913.408654  
8,2,1987.857143  
8,2,2733.021277  
8,2,1667.692308  
8,2,3015.247024  
8,2,1600.229545  
8,2,2671.478261  
8,2,2261.803571  
8,2,1554.185430  
8,2,1566.913043  
8,2,7921.877604  
8,2,4026.062500  
8,2,2019.135417  
8,2,1576.342593  
8,2,1876.437500  
8,2,3457.500000  
8,2,3179.719512  
8,2,5871.400000  
8,2,1566.301630  
8,2,1971.810000  
8,2,1621.735294  
8,2,1589.579545  
8,2,3934.041667  
8,2,2700.750000  
8,2,2129.025000  
8,2,1691.888889  
8,2,2610.110577  
8,2,1882.534884  
8,2,4068.290000  
8,2,1688.533333  
8,2,1691.087209  
8,2,6743.191558  
8,2,1899.019737  
8,2,1512.686170  
8,2,4590.526596  
8,2,2054.414894  
8,2,1789.863636  
8,2,1657.078804  
8,2,2195.810976  
8,2,3136.766304  
8,2,1665.390909  
8,2,1690.215116  
8,2,2360.505682  
8,2,1524.488095  
8,2,8678.032258  
8,2,1818.064815  
8,2,1689.900000  
8,2,3932.371528  
8,2,2154.500000  
8,2,1888.027027  
8,2,2166.789216  
8,2,1504.420455  
8,2,1697.881579

8,2,2819.051020  
8,2,2483.047222  
8,2,1507.410714  
8,2,1752.631579  
8,2,6679.047619  
8,2,3087.236111  
8,2,2158.221154  
8,2,2223.114583  
8,2,1574.806604  
8,2,1881.285714  
8,2,1946.238764  
8,2,1858.933673  
8,2,2443.263021  
8,2,1856.677273  
8,2,3157.305556  
8,2,1702.726776  
8,2,2795.162946  
8,2,2004.627551  
8,2,2017.339744  
8,2,1803.093750  
8,2,3467.790000  
8,2,1812.905660  
8,2,1747.916667  
8,2,1942.500000  
8,2,2768.363636  
8,2,2128.511905  
8,2,1640.753205  
8,2,2529.086957  
8,2,2222.964286  
8,2,1528.250000  
8,2,1652.346591  
8,2,1501.269886  
8,2,13416.707447  
8,2,2191.142857  
8,2,1728.862745  
8,2,1550.150000  
8,2,1586.553571  
8,2,1649.959135  
8,2,1949.351852  
8,2,2923.598039  
8,2,2557.456522  
8,2,4716.500000  
8,2,2339.923611  
8,2,1939.454787  
8,2,1817.736413  
8,2,3758.777778  
8,2,4506.910714  
8,2,1645.588710  
8,2,4533.815000  
8,2,1890.097561  
8,2,3298.961538  
8,2,1661.100000  
8,2,4824.029412  
8,2,3136.716981  
8,2,1666.211957  
8,2,3584.214286  
8,2,1529.280000  
8,2,1545.250000  
8,2,1534.812500  
8,2,4097.115196  
8,2,2995.955357  
8,2,6118.090909  
8,2,3625.939189  
8,2,2003.289634  
8,2,2075.263158  
8,2,2959.564516

8,2,3449.428571  
8,2,1804.922619  
8,2,2268.430851  
8,2,1773.294118  
8,2,1682.019444  
8,2,2008.891304  
8,2,1897.885417  
8,2,1507.231707  
8,2,1575.250000  
8,2,1508.230000  
8,2,1863.459677  
8,2,1696.317500  
8,2,3437.617021  
8,2,1505.520833  
8,2,1757.102041  
8,2,1859.726695  
8,2,1787.047872  
8,2,2751.440758  
8,2,1644.418750  
8,2,2198.375000  
8,2,3262.636364  
8,2,2413.017157  
8,2,1558.805000  
8,2,1540.837500  
8,2,3250.117647  
8,2,2892.823980  
8,2,3967.949074  
8,2,1786.090686  
8,2,1642.198171  
8,2,7254.058824  
8,2,3192.125000  
8,2,2262.213542  
8,2,1792.285714  
8,2,1689.640625  
8,2,1680.708333  
8,2,2651.546512  
8,2,13008.450000  
8,2,1630.201087  
8,2,1646.035714  
8,2,1722.031977  
8,2,2632.128472  
8,2,1567.608696  
8,2,1764.500000  
8,2,2046.800000  
8,2,2754.446429  
8,2,1886.588235  
8,2,1577.164062  
8,2,1732.798295  
8,2,1646.510638  
8,2,1922.420732  
8,2,1680.106383  
8,2,2022.236842  
8,2,1513.560000  
8,2,2859.487069  
8,2,3525.378378  
8,2,3303.375000  
8,2,3092.428922  
8,2,1977.118421  
8,2,5014.857143  
8,2,1880.297297  
8,2,1734.287234  
8,2,4103.250000  
8,2,1524.293478  
8,2,1934.872500  
8,2,1694.589286  
8,2,2575.532895

8,2,1567.731383  
8,2,2013.954545  
8,2,1540.410714  
8,2,3431.252551  
8,2,1844.799020  
8,2,2335.617347  
8,2,1696.924084  
8,2,1651.083333  
8,2,2728.360294  
8,2,5760.083333  
8,2,1507.416667  
8,2,1973.690789  
8,2,2908.065476  
8,2,4652.361413  
8,2,2095.062500  
8,2,3567.643617  
8,2,1778.166667  
8,2,1946.194444  
8,2,2140.857143  
8,2,2388.375000  
8,2,2125.575521  
8,2,2090.285714  
8,2,4086.000000  
8,2,2772.601064  
8,2,1785.740000  
8,2,1966.532051  
8,2,1652.250000  
8,2,1582.052083  
8,2,4447.718750  
8,2,2317.442500  
8,2,2946.397727  
8,2,6471.462500  
8,2,1966.693182  
8,2,1788.375000  
8,2,1818.372549  
8,2,1987.691489  
8,2,1897.610169  
8,2,1702.461538  
8,2,3807.396739  
8,2,4316.744681  
8,2,1806.775000  
8,2,1571.714286  
8,2,1864.583333  
8,2,1869.886628  
8,2,1827.130814  
8,2,1759.797297  
8,2,1579.735632  
8,2,1550.660377  
8,2,2151.702381  
8,2,2219.279605  
8,2,3747.166667  
8,2,1833.089286  
8,2,1918.292857  
8,2,4932.027778  
8,2,2416.765957  
8,2,1507.033654  
8,2,1588.343750  
8,2,2367.471429  
8,2,2090.821809  
8,2,1655.613636  
8,2,5013.588235  
8,2,1719.985119  
8,2,5258.556250  
8,2,2409.386792  
8,2,2201.365854  
8,2,1824.482143

8,2,10637.375000  
8,2,5182.448370  
8,2,5075.688889  
8,2,2019.464286  
8,2,1994.366071  
8,2,2084.142857  
8,2,2336.210000  
8,2,2319.150000  
8,2,1634.587500  
8,2,3384.702128  
8,2,5049.290698  
8,2,1966.714286  
8,2,1598.872024  
8,2,2818.802632  
8,2,2006.666667  
8,2,9136.301471  
8,2,2872.543478  
8,2,1976.375000  
8,2,4173.989796  
8,2,2718.481132  
8,2,2007.607143  
8,2,2738.500000  
8,2,1942.953704  
8,2,2532.686275  
8,2,3132.300000  
8,2,1740.750000  
8,2,1695.116071  
8,2,1674.318182  
8,2,5141.089286  
8,2,3788.630000  
8,2,1874.336310  
8,2,5828.397059  
8,2,2538.630102  
8,2,1655.098684  
8,2,1508.628125  
8,2,1631.142857  
8,2,1936.893382  
8,2,2411.593750  
8,2,5532.690000  
8,2,2126.368421  
8,2,1637.500000  
8,2,1574.722727  
8,2,1829.888393  
8,2,2619.035714  
8,2,1973.313776  
8,2,2171.104651  
8,2,1914.625000  
8,2,1913.026786  
8,2,2851.764706  
8,2,1554.911765  
8,2,2058.104167  
8,2,2191.143519  
8,2,1511.487500  
8,2,1637.576531  
8,2,3509.673913  
8,2,1802.041667  
8,2,1815.834906  
8,2,1556.421053  
8,2,2008.676020  
8,2,2123.053191  
8,2,2055.302083  
8,2,2551.975000  
8,2,2145.089286  
8,2,1614.714286  
8,2,2377.208333  
8,2,2291.987805

8,2,1581.140625  
8,2,1556.508333  
8,2,2258.287500  
8,2,2387.897059  
8,2,1662.125000  
8,2,3292.079545  
8,2,1671.580000  
8,2,6236.975610  
8,2,1516.344595  
8,2,3739.421053  
8,2,1668.263889  
8,2,2959.927778  
8,2,3219.508721  
8,2,3043.307292  
8,2,3692.957589  
8,2,1798.523810  
8,2,2047.643750  
8,2,1769.375000  
8,2,2055.393617  
8,2,1619.153846  
8,2,1702.461111  
8,2,1665.852273  
8,2,1512.488372  
8,2,1680.465909  
8,2,1665.321429  
8,2,2172.620000  
8,2,4544.831633  
8,2,3998.461957  
8,2,2111.413043  
8,2,4920.150000  
8,2,1711.589674  
8,2,2665.875000  
8,2,2702.816667  
8,2,1914.392361  
8,2,2075.054487  
8,2,1664.195312  
8,2,2726.013298  
8,2,1688.169872  
8,2,1826.176136  
8,2,2766.648936  
8,2,6598.335227  
8,2,1979.718023  
8,2,3755.662791  
8,2,2060.519608  
8,2,1659.069444  
8,2,4290.460000  
8,2,1638.217105  
8,2,2032.791667  
8,2,2226.781250  
8,2,3508.545455  
8,2,2499.127841  
8,2,2001.612745  
8,2,1667.728723  
8,2,2396.220000  
8,2,3048.716912  
8,2,5369.119444  
8,2,1663.457447  
8,2,1972.230769  
8,2,1678.562500  
8,2,4576.571429  
8,2,2638.372549  
8,2,5934.184211  
8,2,2102.136364  
8,2,1818.141026  
8,2,3643.743902  
8,2,2879.276042

8,2,1923.843023  
8,2,2456.137931  
8,2,4186.321875  
8,2,1869.021277  
8,2,2270.120000  
8,2,1631.184375  
8,2,1599.554054  
8,2,2019.985849  
8,2,1720.510417  
8,2,1639.071429  
8,2,1563.029412  
8,2,1517.846939  
8,2,1651.291667  
8,2,1721.375000  
8,2,2985.433333  
8,2,4019.000000  
8,2,2646.371951  
8,2,3107.864865  
8,2,2853.072727  
8,2,1872.112245  
8,2,2970.327869  
8,2,3726.936170  
8,2,2712.250000  
8,2,2068.390625  
8,2,4885.953125  
8,2,1977.240000  
8,2,1582.000000  
8,2,1684.686275  
8,2,2107.002976  
8,2,3121.666667  
8,2,7579.375000  
8,2,2221.494444  
8,2,1694.134146  
8,2,2757.500000  
8,2,1594.875000  
8,2,3744.067797  
8,2,3381.871212  
8,2,1662.555851  
8,2,1695.734694  
8,2,1502.230769  
8,2,2760.888298  
8,2,1608.810976  
8,2,1529.341837  
8,2,2927.647727  
8,2,1614.765625  
8,2,6471.288043  
8,2,3184.272727  
8,2,1605.557377  
8,2,4045.130814  
8,2,2210.563953  
8,2,2160.821429  
8,2,1552.109375  
8,2,1789.435897  
8,2,3285.579082  
8,2,1679.656863  
8,2,2177.083333  
8,2,4098.028646  
8,2,1895.863636  
8,2,2896.553191  
8,2,1601.750000  
8,2,2284.664062  
8,2,1579.524590  
8,2,2278.818750  
8,2,1690.766892  
8,2,1725.132212  
8,2,3737.858108

8,2,1550.141304  
8,2,1824.454082  
8,2,2158.869565  
8,2,3381.632812  
8,2,2199.377358  
8,2,2918.002907  
8,2,3605.720588  
8,2,1516.725543  
8,2,1625.000000  
8,2,1636.261364  
8,2,2230.034884  
8,2,2383.465116  
8,2,2501.083333  
8,2,1915.433333  
8,2,3072.614362  
8,2,2403.205128  
8,2,2014.489362  
8,2,1743.307065  
8,2,2113.579787  
8,2,1503.975000  
8,2,1935.266304  
8,2,2153.042500  
8,2,1726.077381  
8,2,1802.500000  
8,2,5474.687500  
8,2,1823.573171  
8,2,1723.431122  
8,2,1774.583333  
8,2,2808.454545  
8,2,1545.677632  
8,2,1523.511628  
8,2,2692.117647  
8,2,19993.995000  
8,2,1759.789894  
8,2,1731.231481  
8,2,2428.063953  
8,2,1892.825000  
8,2,1594.715686  
8,2,1695.257812  
8,2,3250.892857  
8,2,3509.122093  
8,2,2029.202128  
8,2,1581.919811  
8,2,1499.255102  
8,2,4591.095745  
8,2,1657.546875  
8,2,2163.592391  
8,2,1989.465909  
8,2,2500.797500  
8,2,2121.317500  
8,2,1900.681548  
8,2,1688.441489  
8,2,1608.972561  
8,2,1606.206587  
8,2,1812.621875  
8,2,2158.948529  
8,2,1908.562500  
8,2,1523.649306  
8,2,2691.485294  
8,2,3192.242021  
8,2,2551.312500  
8,2,1992.236842  
8,2,1744.479730  
8,2,1914.182432  
8,2,2744.982500  
8,2,2395.041667

8,2,2106.021277  
8,2,2258.700000  
8,2,2277.202128  
8,2,2170.363636  
8,2,1815.889423  
8,2,2399.434659  
8,2,3255.138756  
8,2,2340.272727  
8,2,2339.923077  
8,2,2112.100000  
8,2,4457.285714  
8,2,1517.514151  
8,2,2310.625000  
8,2,4249.528061  
8,2,3191.636905  
8,2,3046.419075  
8,2,1750.928571  
8,2,2369.022222  
8,2,5246.063953  
8,2,1635.638298  
8,2,2278.936275  
8,2,1582.486111  
8,2,1572.500000  
8,2,16064.000000  
8,2,6964.046875  
8,2,2229.290094  
8,2,3844.692708  
8,2,2192.276596  
8,2,16867.121212  
8,2,1511.625000  
8,2,2006.371622  
8,2,1615.034483  
8,2,3798.468750  
8,2,1702.733696  
8,2,1861.409884  
8,2,1692.181818  
8,2,2596.982143  
8,2,3620.017857  
8,2,2931.833333  
8,2,1949.117021  
8,2,6230.968085  
8,2,1994.366279  
8,2,2986.211310  
8,2,4973.630435  
8,2,1600.104730  
8,2,2192.318627  
8,2,3252.538690  
8,2,2538.265625  
8,2,2390.009146  
8,2,1567.280612  
8,2,1617.303571  
8,2,1544.325893  
8,2,4850.054348  
8,2,1858.625000  
8,2,2086.250000  
8,2,1890.734043  
8,2,1928.636364  
8,2,1514.603261  
8,2,1731.918919  
8,2,3156.877778  
8,2,2646.656915  
8,2,1988.767442  
8,2,2286.333333  
8,2,1834.959184  
8,2,10570.459459  
8,2,1972.250000

8,2,1539.519231  
8,2,5128.392857  
8,2,2572.086538  
8,2,1904.687500  
8,2,1734.026042  
8,2,1665.857143  
8,2,2869.915865  
8,2,2127.920000  
8,2,2356.500000  
8,2,2698.850340  
8,2,1597.312500  
8,2,1764.557292  
8,2,1902.300676  
8,2,1535.050000  
8,2,1820.067308  
8,2,2978.583333  
8,2,1642.219907  
8,2,1529.146277  
8,2,3111.647727  
8,2,3259.131579  
8,2,1580.500000  
8,2,1725.775943  
8,2,2309.437500  
8,2,2405.505319  
8,2,2483.994898  
8,2,2685.284091  
8,2,1820.992647  
8,2,3187.976064  
8,2,1643.451087  
8,2,2830.600000  
8,2,3133.835366  
8,2,12998.223958  
8,2,1765.232955  
8,2,3409.668750  
8,2,2969.814815  
8,2,2072.679054  
8,2,1971.913462  
8,2,2211.337209  
8,2,2197.094388  
8,2,1613.380000  
8,2,1648.250000  
8,2,2233.322917  
8,2,2032.680556  
8,2,8355.387821  
8,2,2082.270000  
8,2,3658.822368  
8,2,2763.411184  
8,2,2548.446429  
8,2,1916.851064  
8,2,8124.439024  
8,2,1833.177778  
8,2,1845.193182  
8,2,2049.271277  
8,2,6600.238095  
8,2,1765.203947  
8,2,1522.619048  
8,2,3152.122093  
8,2,1980.000000  
8,2,1648.000000  
8,2,1761.208333  
8,2,1766.923913  
8,2,1707.709375  
8,2,1664.333333  
8,2,1585.065476  
8,2,6530.951705  
8,2,1739.760870

8,2,1714.039474  
8,2,1634.757979  
8,2,1744.352740  
8,2,1524.072500  
8,2,1653.007353  
8,2,1901.031250  
8,2,4910.668919  
8,2,2675.328947  
8,2,2391.625000  
8,2,1780.480000  
8,2,3854.282609  
8,2,7959.013514  
8,2,1761.312500  
8,2,2252.127451  
8,2,3206.960784  
8,2,1624.092920  
8,2,1518.458824  
8,2,2693.035000  
8,2,1770.393750  
8,2,1889.404255  
8,2,2033.833333  
8,2,1612.723404  
8,2,2147.162500  
8,2,5499.703488  
8,2,1673.464674  
8,2,3010.312500  
8,2,1659.575521  
8,2,2179.423295  
8,2,1755.726190  
8,2,1501.406250  
8,2,2398.053191  
8,2,1649.093023  
8,2,2415.309896  
8,2,2196.740385  
8,2,4005.928571  
8,2,1642.721939  
8,2,1684.617647  
8,2,1595.836957  
8,2,2270.702128  
8,2,1585.187500  
8,2,1715.423913  
8,2,13701.687500  
8,2,1635.798077  
8,2,1934.161765  
8,2,1959.576531  
8,2,2625.744318  
8,2,2007.625000  
8,2,1593.357143  
8,2,2467.136628  
8,2,1515.826923  
8,2,1961.160714  
8,2,2798.687500  
8,2,2313.500000  
8,2,2450.230769  
8,2,1519.625000  
8,2,1548.295000  
8,2,1992.208333  
8,2,1846.085227  
8,2,2422.163265  
8,2,2226.200000  
8,2,1859.051630  
8,2,2195.974490  
8,2,16779.929245  
8,2,1616.454545  
8,2,2464.517500  
8,2,1613.018617

8,2,1566.323529  
8,2,2052.455128  
8,2,1763.633929  
8,2,3135.333333  
8,2,1591.918919  
8,2,1835.603125  
8,2,2858.792857  
8,2,2825.367647  
8,2,1650.329268  
8,2,1831.385870  
8,2,2001.287500  
8,2,1691.059783  
8,2,1536.171429  
8,2,1810.601852  
8,2,1741.625000  
8,2,2631.336111  
8,2,1565.820000  
8,2,1639.586538  
8,2,2023.117647  
8,2,1902.980769  
8,2,1888.712500  
8,2,2047.853659  
8,2,1587.914773  
8,2,2655.881579  
8,2,3843.877907  
8,2,1932.166667  
8,2,2315.083333  
8,2,3689.882353  
8,2,1731.187500  
8,2,2488.651786  
8,2,1796.489362  
8,2,2526.270000  
8,2,1628.412234  
8,2,1638.312500  
8,2,3246.048077  
8,2,2578.161290  
8,2,1754.607143  
8,2,3497.857759  
8,2,4431.058333  
8,2,5085.928571  
8,2,1573.818182  
8,2,2521.053571  
8,2,3714.493590  
8,2,1519.960000  
8,2,1675.252358  
8,2,1874.216912  
8,2,2172.273585  
8,2,4932.435811  
8,2,1680.364130  
8,2,2599.343750  
8,2,2615.407609  
8,2,2169.927966  
8,2,1629.215426  
8,2,2112.269737  
8,2,1633.697674  
8,2,3032.108108  
8,2,2684.269737  
8,2,1687.574468  
8,2,1870.883929  
8,2,9347.533163  
8,2,2489.310185  
8,2,2414.631579  
8,2,1990.771739  
8,2,4145.464286  
8,2,8294.931122  
8,2,1837.642241

8,2,1643.026442  
8,2,5892.534314  
8,2,1517.476190  
8,2,1514.303571  
8,2,2451.808511  
8,2,1501.039062  
8,2,1555.966667  
8,2,1674.684211  
8,2,1693.152439  
8,2,3223.057432  
8,2,1895.636905  
8,2,2951.879808  
8,2,2000.948980  
8,2,1825.316176  
8,2,1694.849490  
8,2,1587.142857  
8,2,2881.923077  
8,2,1513.250000  
8,2,2002.414894  
8,2,1995.062500  
8,2,1515.045455  
8,2,4028.180000  
8,2,7813.500000  
8,2,1990.777344  
8,2,1784.278509  
8,2,1609.597222  
8,2,2931.926471  
8,2,3731.997159  
8,2,1741.584375  
8,2,4266.146119  
8,2,1506.517157  
8,2,1643.277174  
8,2,2187.551020  
8,2,2144.940217  
8,2,1591.675000  
8,2,1807.173913  
8,2,1959.346591  
8,2,1560.548611  
8,2,1541.517045  
8,2,6531.390625  
8,2,1613.733607  
8,2,2401.474490  
8,2,2174.463636  
8,2,1691.521739  
8,2,1677.064815  
8,2,2259.180851  
8,2,1894.350000  
8,2,1687.282609  
8,2,1512.459302  
8,2,1775.818750  
8,2,4759.169492  
8,2,1778.973684  
8,2,1994.698980  
8,2,1503.685714  
8,2,1752.940476  
8,2,3095.822115  
8,2,1575.052326  
8,2,2297.155172  
8,2,1532.628049  
8,2,3782.230159  
8,2,1579.812500  
8,2,1833.032143  
8,2,1728.808140  
8,2,2120.893617  
8,2,1844.881579  
8,2,3344.805556

8,2,2566.039773  
8,2,3379.216667  
8,2,7170.842857  
8,2,3900.014706  
8,2,4747.816327  
8,2,2031.716667  
8,2,2160.041667  
8,2,18155.941176  
8,2,3243.598214  
8,2,4756.899497  
8,2,16608.469298  
8,2,11606.885135  
8,2,2073.000000  
8,2,1871.227273  
8,2,12318.534375  
8,2,2635.714286  
8,2,5720.967500  
8,2,1640.215909  
8,2,3050.592391  
8,2,2114.102679  
8,2,10341.702703  
8,2,1605.000000  
8,2,7540.156250  
8,2,2220.056122  
8,2,2123.894737  
8,2,2093.971154  
8,2,1874.302778  
8,2,3590.769231  
8,2,2757.235294  
8,2,1794.636364  
8,2,1853.510417  
8,2,3729.489583  
8,2,2710.812500  
8,2,5188.158654  
8,2,2001.000000  
8,2,1597.777439  
8,2,4530.028846  
8,2,2026.120000  
8,2,1532.929348  
8,2,1795.666667  
8,2,7045.805556  
8,2,1586.122449  
8,2,2339.875000  
8,2,6033.838235  
8,2,1779.744681  
8,2,2082.033654  
8,2,2093.208333  
8,2,3060.728723  
8,2,1563.965625  
8,2,2543.956522  
8,2,3513.809783  
8,2,2336.482143  
8,2,3231.031250  
8,2,1728.910326  
8,2,2511.158019  
8,2,2000.007979  
8,2,4320.595109  
8,2,3176.375000  
8,2,4919.375000  
8,2,2522.622024  
8,2,1941.063953  
8,2,1592.419118  
8,2,2313.403846  
8,2,2156.181373  
8,2,1862.022727  
8,2,3318.921875

8,2,1511.228723  
8,2,1993.053571  
8,2,2877.000000  
8,2,2209.266304  
8,2,3685.684211  
8,2,2864.690909  
8,2,15536.222222  
8,2,4012.260417  
8,2,2327.176471  
8,2,5389.833333  
8,2,1675.895833  
8,2,1525.166667  
8,2,2493.040000  
8,2,6256.222222  
8,2,3158.294118  
8,2,2903.478125  
8,2,3909.786458  
8,2,1566.200000  
8,2,1629.875000  
8,2,3013.847500  
8,2,1855.300926  
8,2,5212.666667  
8,2,1872.842500  
8,2,5805.789583  
8,2,1593.428191  
8,2,1642.533333  
8,2,2475.475000  
8,2,1619.889706  
8,2,3411.118243  
8,2,2349.276316  
8,2,4412.790000  
8,2,1878.266304  
8,2,1763.666667  
8,2,1936.928571  
8,2,7208.664474  
8,2,2070.707547  
8,2,1733.720588  
8,2,1904.333333  
8,2,1610.403846  
8,2,1563.298077  
8,2,3191.750000  
8,2,1790.625000  
8,2,2563.989362  
8,2,1840.134615  
8,2,2525.400000  
8,2,1854.087500  
8,2,2021.291667  
8,2,1762.034375  
8,2,6566.463415  
8,2,1582.105769  
8,2,6280.403125  
8,2,1773.136364  
8,2,2728.037500  
8,2,1581.750000  
8,2,2213.549419  
8,2,10907.031250  
8,2,1985.060345  
8,2,1717.500000  
8,2,3421.820122  
8,2,1817.219512  
8,2,3809.075000  
8,2,2079.041667  
8,2,1787.687500  
8,2,6298.744792  
8,2,2439.771739  
8,2,1730.770270

8,2,1579.046512  
8,2,1843.140957  
8,2,9558.863636  
8,2,2571.958333  
8,2,4903.544118  
8,2,2459.302326  
8,2,1999.940000  
8,2,5469.050000  
8,2,2694.213415  
8,2,1844.314286  
8,2,2474.695652  
8,2,4012.640306  
8,2,1694.176829  
8,2,2279.357143  
8,2,2722.562500  
8,2,1686.957447  
8,2,2213.208333  
8,2,1819.306122  
8,2,1950.724138  
8,2,1990.924107  
8,2,1524.166667  
8,2,3337.000000  
8,2,1978.340625  
8,2,1537.725000  
8,2,17455.821918  
8,2,2109.692308  
8,2,3458.296196  
8,2,3608.567308  
8,2,3967.187500  
8,2,2256.625000  
8,2,1517.192308  
8,2,1594.741071  
8,2,1540.280000  
8,2,1932.596939  
8,2,2334.384615  
8,2,3060.335821  
8,2,4379.211538  
8,2,6035.625000  
8,2,1504.882653  
8,2,10653.527778  
8,2,1578.125000  
8,2,2274.568878  
8,2,1625.750000  
8,2,1950.789474  
8,2,1625.970238  
8,2,3267.887500  
8,2,2297.028481  
8,2,5679.174528  
8,2,2008.051020  
8,2,3203.096774  
8,2,2095.600000  
8,2,2313.904762  
8,2,1702.075000  
8,2,2223.625000  
8,2,1705.455000  
8,2,2075.758333  
8,2,2364.521739  
8,2,1941.712838  
8,2,1728.805556  
8,2,3951.625000  
8,2,1597.327703  
8,2,1942.281250  
8,2,1837.256579  
8,2,1620.446043  
8,2,1705.887755  
8,2,3189.351852

8,2,2893.352273  
8,2,2659.796196  
8,2,2032.733696  
8,2,1505.250000  
8,2,1973.543478  
8,2,2132.265625  
8,2,2031.772727  
8,2,1948.798077  
8,2,3603.000000  
8,2,4076.173913  
8,2,2167.340000  
8,2,1779.500000  
8,2,2351.902174  
8,2,2241.053977  
8,2,1786.165000  
8,2,1704.200980  
8,2,4918.510638  
8,2,4502.187500  
8,2,3244.875000  
8,2,1545.057065  
8,2,4278.984694  
8,2,1693.468750  
8,2,1528.083333  
8,2,2591.059091  
8,2,1653.164634  
8,2,2014.166667  
8,2,6407.333333  
8,2,9446.090426  
8,2,6160.140625  
8,2,1588.385638  
8,2,2804.605469  
8,2,1850.500000  
8,2,12423.125000  
8,2,9673.409091  
8,2,1784.683824  
8,2,11448.197368  
8,2,2397.005859  
8,2,1586.000000  
8,2,1634.227273  
8,2,2495.448529  
8,2,2845.220000  
9,1,16672.384375  
9,1,1696.906250  
9,1,5434.941176  
9,1,11801.268519  
9,1,2372.033784  
9,1,8211.310606  
9,1,1686.666667  
9,1,6621.347727  
9,1,4322.465909  
9,1,3451.813953  
9,1,1510.170732  
9,1,3059.923913  
9,1,10299.323529  
9,1,10566.033088  
9,1,10110.010870  
9,1,3275.587838  
9,1,3025.818182  
9,1,1699.885870  
9,1,1835.278125  
9,1,11919.465909  
9,1,1568.746875  
9,1,6413.352941  
9,1,3413.916667  
9,1,2802.908537  
9,1,3137.177419

9,1,8193.262500  
9,1,4197.829268  
9,1,2846.120000  
9,1,2399.189189  
9,1,2023.503571  
9,1,4054.835196  
9,1,3416.283784  
9,1,5172.875000  
9,1,5278.472973  
9,1,1720.291667  
9,1,3182.444444  
9,1,4460.857143  
9,1,3047.260714  
9,1,2441.378289  
9,1,2953.712766  
9,1,1617.348404  
9,1,8412.086310  
9,1,3224.636364  
9,1,10591.184211  
9,1,1848.178571  
9,1,14088.275000  
9,1,8352.898810  
9,1,1680.609043  
9,1,6457.779412  
9,1,2182.264423  
9,1,2116.359375  
9,1,2111.503378  
9,1,1597.975610  
9,1,13131.977273  
9,1,14223.892857  
9,1,1785.005435  
9,1,1923.198864  
9,1,15974.117021  
9,1,16703.837500  
9,1,3079.000000  
9,1,3210.744681  
9,1,10832.500000  
9,1,8951.365385  
9,1,5490.225000  
9,1,2249.233333  
9,1,1795.784314  
9,1,1582.127778  
9,1,1508.134615  
9,1,6420.443750  
9,1,4636.838235  
9,1,19588.353659  
9,1,3705.665761  
9,1,3070.433824  
9,1,2277.744186  
9,1,1954.675000  
9,1,4308.592262  
9,1,6187.000000  
9,1,1890.475000  
9,1,1793.276596  
9,1,3838.781250  
9,1,3330.439655  
9,1,1759.784722  
9,1,1927.750000  
9,1,2272.252841  
9,1,3180.346591  
9,1,1905.268072  
9,1,9581.226974  
9,1,5468.470745  
9,1,4639.611842  
9,1,2022.083333  
9,1,5649.633065

9,1,12550.549242  
9,1,2145.057692  
9,1,2436.693750  
9,1,5400.435185  
9,1,1936.250000  
9,1,19230.500000  
9,1,6933.785326  
9,1,18611.750000  
9,1,1812.661184  
9,1,2377.521277  
9,1,2681.352941  
9,1,2989.239796  
9,1,8791.095745  
9,1,2159.634146  
9,1,1656.002717  
9,1,3735.181818  
9,1,4864.544643  
9,1,2592.297297  
9,1,3972.187500  
9,1,1811.822917  
9,1,2760.272059  
9,1,1756.216463  
9,1,2627.806818  
9,1,2186.500000  
9,1,1663.305851  
9,1,1504.178571  
9,1,1988.536765  
9,1,2307.911058  
9,1,1555.086957  
9,1,4336.011719  
9,1,2572.959459  
9,1,2743.280000  
9,1,2867.183673  
9,1,14120.316406  
9,1,2383.656250  
9,1,5115.885417  
9,1,1703.039474  
9,1,2564.228723  
9,1,12035.977273  
9,1,1840.050000  
9,1,6217.805147  
9,1,3492.140625  
9,1,1658.858108  
9,1,1587.632653  
9,1,1958.382353  
9,1,7038.314103  
9,1,7165.527027  
9,1,1631.190000  
9,1,7789.539634  
9,1,2633.288462  
9,1,3619.227941  
9,1,2899.589286  
9,1,7775.454545  
9,1,2446.157895  
9,1,2889.000000  
9,1,2027.617647  
9,1,1812.205128  
9,1,1779.473404  
9,1,10783.884868  
9,1,5255.708333  
9,1,1987.976744  
9,1,5379.854167  
9,1,1779.694444  
9,1,2337.142857  
9,1,1697.132576  
9,1,1815.568548

9,1,3456.700000  
9,1,4010.353659  
9,1,2465.894737  
9,1,1536.532258  
9,1,3426.968085  
9,1,14037.456250  
9,1,2366.285714  
9,1,4219.451613  
9,1,14580.437500  
9,1,3527.079545  
9,1,4035.779891  
9,1,7904.979167  
9,1,15153.481618  
9,1,8213.258065  
9,1,4395.500000  
9,1,4105.551724  
9,1,13796.851852  
9,1,16921.996429  
9,1,2683.775000  
9,1,3177.066176  
9,1,16383.863636  
9,1,6762.274194  
9,1,4508.738095  
9,1,15161.666667  
9,1,3126.531915  
9,1,2249.698171  
9,1,3352.225962  
9,1,1766.645833  
9,1,3103.070312  
9,1,4110.459821  
9,1,4498.041667  
9,1,2733.921053  
9,1,11132.267241  
9,1,5538.340278  
9,1,4749.588235  
9,1,12079.928191  
9,1,2503.140244  
9,1,3335.421053  
9,1,2964.119681  
9,1,5648.675000  
9,1,2793.279070  
9,1,2865.096154  
9,1,1560.277439  
9,1,1571.108696  
9,1,2304.000000  
9,1,3280.500000  
9,1,3808.078571  
9,1,7374.385417  
9,1,7452.755556  
9,1,4048.148438  
9,1,1787.730978  
9,1,1807.753906  
9,1,9894.630435  
9,1,1814.518617  
9,1,5541.783784  
9,1,3855.522059  
9,1,4084.142857  
9,1,3167.765625  
9,1,3097.190789  
9,1,2267.406977  
9,1,3166.506410  
9,1,2753.560606  
9,1,2574.042683  
9,1,2368.133721  
9,1,2296.383333  
9,1,3841.103571

9,1,5227.317500  
9,1,18048.453125  
9,1,2038.159091  
9,1,6117.818750  
9,1,1735.129032  
9,1,1657.453488  
9,1,4788.813953  
9,1,2682.218750  
9,1,2179.496324  
9,1,1886.066176  
9,1,17286.125000  
9,1,2039.477273  
9,1,2278.365132  
9,1,1687.000000  
9,1,2216.342949  
9,1,5290.666667  
9,1,3058.140244  
9,1,9879.117647  
9,1,4281.328804  
9,1,4345.013514  
9,1,1757.012500  
9,1,1643.131944  
9,1,2724.674020  
9,1,15888.333333  
9,1,3066.611111  
9,1,5085.051630  
9,1,3075.797500  
9,1,2705.592262  
9,1,2220.550000  
9,1,16455.175000  
9,1,1812.128378  
9,1,2314.424419  
9,1,14741.274510  
9,1,1681.244318  
9,1,2173.242424  
9,1,2615.881579  
9,1,8021.244048  
9,1,8785.144531  
9,1,4285.593750  
9,1,9956.973485  
9,1,2867.732143  
9,1,8191.663462  
9,1,12844.833333  
9,1,4382.016667  
9,1,2492.500000  
9,1,19714.468750  
9,1,6505.344388  
9,1,6458.541667  
9,1,2360.143293  
9,1,1664.600694  
9,1,3233.302083  
9,1,3456.722222  
9,1,8284.444444  
9,1,4578.234043  
9,1,4891.375000  
9,1,4899.487500  
9,1,11771.723404  
9,1,12370.250000  
9,1,2069.985294  
9,1,1679.129032  
9,1,1843.693878  
9,1,3217.375000  
9,1,2075.121711  
9,1,3347.360000  
9,1,2542.892157  
9,1,18322.525000

9,1,3177.103723  
9,1,3517.425532  
9,1,1637.687500  
9,1,2084.213068  
9,1,11226.138514  
9,1,2272.090116  
9,1,4607.967391  
9,1,11748.378125  
9,1,10130.303571  
9,1,1878.263514  
9,1,7088.194767  
9,1,3269.857143  
9,1,2170.784091  
9,1,3909.315217  
9,1,1857.494565  
9,1,4924.963542  
9,1,1512.132812  
9,1,2076.267442  
9,1,5051.864583  
9,1,2660.871212  
9,1,14440.500000  
9,1,7968.083333  
9,1,5860.010135  
9,1,1608.116667  
9,1,2432.000000  
9,1,8542.000000  
9,1,9688.808140  
9,1,3580.285714  
9,1,3630.442857  
9,1,7556.762195  
9,1,2262.472222  
9,1,5815.558036  
9,1,2111.981707  
9,1,2400.308824  
9,1,2408.875000  
9,1,14625.893939  
9,1,2423.750000  
9,1,12583.596154  
9,1,6311.284884  
9,1,4009.600000  
9,1,1900.777778  
9,1,2789.078125  
9,1,2405.956731  
9,1,11958.092500  
9,1,1837.151515  
9,1,3863.540323  
9,1,3473.683824  
9,1,1753.941860  
9,1,5598.418605  
9,1,2107.054054  
9,1,2970.393382  
9,1,1570.641447  
9,1,1898.338235  
9,1,3652.450000  
9,1,3904.367347  
9,1,4863.915698  
9,1,11998.836538  
9,1,18034.416667  
9,1,1807.622222  
9,1,2378.893293  
9,1,4987.994681  
9,1,2455.693750  
9,1,2299.085714  
9,1,6807.401316  
9,1,2403.111111  
9,1,6285.871795

9,1,15434.906250  
9,1,17654.791667  
9,1,1614.524194  
9,1,1999.578125  
9,1,1779.437500  
9,1,1561.111413  
9,1,1562.687117  
9,1,1759.625000  
9,1,1810.895833  
9,1,17771.258065  
9,1,1550.080882  
9,1,8545.571429  
9,1,1906.681548  
9,1,10279.994048  
9,1,2226.673913  
9,1,3303.951613  
9,1,16219.780576  
9,1,3283.457031  
9,1,1654.595238  
9,1,2543.118421  
9,1,1875.768750  
9,1,1599.085366  
9,1,3337.729839  
9,1,3396.727273  
9,1,3184.913793  
9,1,1891.034722  
9,1,1683.611702  
9,1,2624.648438  
9,1,17373.928571  
9,1,12680.375000  
9,1,1917.886364  
9,1,2601.542683  
9,1,3306.425676  
9,1,5524.276596  
9,1,2537.538462  
9,1,8391.366935  
9,1,1551.715116  
9,1,1743.270833  
9,1,3901.638158  
9,1,7182.300000  
9,1,2385.919118  
9,1,2551.606618  
9,1,6710.293750  
9,1,12058.464286  
9,1,3581.855769  
9,1,1531.927632  
9,1,3126.256410  
9,1,7767.129032  
9,1,6112.904255  
9,1,1859.774194  
9,1,11635.406250  
9,1,5942.361111  
9,1,12266.985294  
9,1,3078.630435  
9,1,8966.055556  
9,1,3800.182927  
9,1,4533.500000  
9,1,1554.409091  
9,1,5357.946809  
9,1,2317.647959  
9,1,7566.404255  
9,1,2932.939516  
9,1,3885.026144  
9,1,2494.142857  
9,1,7930.897222  
9,1,1733.815217

9,1,1638.967391  
9,1,2129.222561  
9,1,9912.953488  
9,1,11171.096429  
9,1,1980.375000  
9,1,2832.791667  
9,1,4948.821429  
9,1,7699.435976  
9,1,3356.803191  
9,1,1881.952381  
9,1,7288.607143  
9,1,7176.050000  
9,1,3576.619048  
9,1,3046.846154  
9,1,3351.125000  
9,1,7138.095238  
9,1,4816.768750  
9,1,1669.045714  
9,1,16587.687500  
9,1,1545.200000  
9,1,1871.776316  
9,1,4367.845588  
9,1,7048.218750  
9,1,3998.632812  
9,1,3134.418367  
9,1,1543.725000  
9,1,3060.287234  
9,1,18973.145349  
9,1,2595.388889  
9,1,2801.789634  
9,1,11066.750000  
9,1,1816.227273  
9,1,2355.568182  
9,1,18331.706633  
9,1,8620.191406  
9,1,4847.719595  
9,1,5583.259375  
9,1,1920.691860  
9,1,3104.979592  
9,1,15672.500000  
9,1,6086.064024  
9,1,1753.675000  
9,1,1966.591216  
9,1,3732.101562  
9,1,4118.084677  
9,1,8274.766892  
9,1,2604.706250  
9,1,15494.322917  
9,1,2238.211538  
9,1,2978.560976  
9,1,4255.788043  
9,1,4106.915625  
9,1,4561.255319  
9,1,2652.159091  
9,1,1555.190476  
9,1,5369.500000  
9,1,3937.989796  
9,1,2911.672794  
9,1,1525.644737  
9,1,4075.312500  
9,1,1527.100000  
9,1,2020.310345  
9,1,3213.046875  
9,1,2828.285714  
9,1,5695.250000  
9,1,6873.687500

9,1,8767.602564  
9,1,1810.229839  
9,1,3171.320513  
9,1,7247.539474  
9,1,11818.923077  
9,1,17456.625000  
9,1,6570.210526  
9,1,1623.081633  
9,1,6110.431250  
9,1,2858.290698  
9,1,2240.825581  
9,1,1884.599265  
9,1,6719.750000  
9,1,9491.209239  
9,1,12487.419643  
9,1,4314.849265  
9,1,4594.090909  
9,1,18090.869565  
9,1,2832.687500  
9,1,2499.656250  
9,1,1860.698529  
9,1,1602.546875  
9,1,2010.921429  
9,1,2643.169643  
9,1,1738.839744  
9,1,2093.493421  
9,1,5201.647727  
9,1,3995.959184  
9,1,1997.804054  
9,1,2006.421053  
9,1,1558.291667  
9,1,5133.062500  
9,1,5246.724359  
9,1,3761.829787  
9,1,7267.700000  
9,1,4033.489583  
9,1,12601.729730  
9,1,3289.625000  
9,1,6370.800000  
9,1,8380.516129  
9,1,13803.607143  
9,1,1542.548387  
9,1,2383.243902  
9,1,1733.068182  
9,1,2141.997340  
9,1,3499.002841  
9,1,9003.958333  
9,1,5733.918919  
9,1,4186.983333  
9,1,3326.848214  
9,1,6649.197674  
9,1,1616.562500  
9,1,8120.181548  
9,1,3534.696023  
9,1,6519.722973  
9,1,6266.404070  
9,1,1818.720238  
9,1,5166.562500  
9,1,2491.190476  
9,1,11237.264706  
9,1,2565.817308  
9,1,2142.585938  
9,1,11330.991935  
9,1,2542.069767  
9,1,8012.500000  
9,1,9674.843750

9,1,9669.122024  
9,1,3938.853723  
9,1,3208.119048  
9,1,4141.040000  
9,1,3905.000000  
9,1,3290.034375  
9,1,5274.720588  
9,1,1855.062500  
9,1,3506.486111  
9,1,1883.916667  
9,1,1512.838235  
9,1,4573.193182  
9,1,2047.953488  
9,1,1951.689103  
9,1,2136.915698  
9,1,2406.116071  
9,1,8978.996528  
9,1,2128.052632  
9,1,14327.000000  
9,1,8248.548611  
9,1,1911.326923  
9,1,1520.808824  
9,1,2308.137755  
9,1,10414.852941  
9,1,3494.041667  
9,1,11483.291667  
9,1,2119.701389  
9,1,3191.561224  
9,1,3265.905556  
9,1,2811.595238  
9,1,2479.196429  
9,1,3392.131579  
9,1,3838.828571  
9,1,3006.677419  
9,1,2240.987805  
9,1,3681.509615  
9,1,2692.215116  
9,1,2197.031915  
9,1,4678.104167  
9,1,2204.494048  
9,1,3352.768293  
9,1,17027.955882  
9,1,9024.502907  
9,1,3596.882075  
9,1,11303.272727  
9,1,2073.541667  
9,1,4256.819079  
9,1,2685.514706  
9,1,14113.843023  
9,1,1779.196429  
9,1,2794.933594  
9,1,7099.035714  
9,1,1637.617021  
9,1,2104.500000  
9,1,6565.825000  
9,1,15167.819444  
9,1,2005.960938  
9,1,1775.821429  
9,1,2328.414286  
9,1,19238.266667  
9,1,2064.234375  
9,1,7171.475000  
9,1,1987.325000  
9,1,2388.400000  
9,1,8553.298780  
9,1,3990.447368

9,1,2321.875000  
9,1,2054.562500  
9,1,3612.783088  
9,1,10058.155405  
9,1,4689.065625  
9,1,3059.734375  
9,1,13024.450000  
9,1,14146.253472  
9,1,1512.939394  
9,1,3404.945652  
9,1,2113.391304  
9,1,6844.346875  
9,1,3520.380682  
9,1,10053.410714  
9,1,1960.000000  
9,1,4400.514706  
9,1,4784.100000  
9,1,2312.088235  
9,1,2817.975610  
9,1,2706.944134  
9,1,1731.424419  
9,1,4720.851562  
9,1,2630.170455  
9,1,1622.382812  
9,1,13248.557143  
9,1,1794.564024  
9,1,3144.863095  
9,1,1517.507812  
9,1,17923.678571  
9,1,1832.818750  
9,1,4617.177083  
9,1,10923.698171  
9,1,2813.267857  
9,1,2333.009259  
9,1,5978.000000  
9,1,4442.718750  
9,1,7839.125000  
9,1,3051.076923  
9,1,6563.583333  
9,1,3808.307692  
9,1,1731.045455  
9,1,2245.368421  
9,1,16811.671875  
9,1,1891.617188  
9,1,19676.625000  
9,1,1790.288889  
9,1,2924.677778  
9,1,11400.430556  
9,1,1533.704545  
9,1,3531.973837  
9,1,5260.769444  
9,1,2868.888298  
9,1,1503.038265  
9,1,6942.367925  
9,1,3926.080357  
9,1,2585.680851  
9,1,3668.095588  
9,1,5785.375000  
9,1,12730.269231  
9,1,2120.758721  
9,1,3586.625000  
9,1,1930.178571  
9,1,8752.281250  
9,1,6380.974265  
9,1,4784.136364  
9,1,2412.167683

9,1,2083.142857  
9,1,13231.891304  
9,1,3259.515957  
9,1,3503.214286  
9,1,1965.400000  
9,1,1867.647059  
9,1,16670.480769  
9,1,5084.881579  
9,1,2549.681818  
9,1,14419.674242  
9,1,17808.335106  
9,1,5433.589286  
9,1,1658.264706  
9,1,19530.000000  
9,1,3159.360465  
9,1,6468.223684  
9,1,1569.075581  
9,1,13085.913043  
9,1,6962.941176  
9,1,1563.267857  
9,1,8711.225000  
9,1,2312.250000  
9,1,2712.114286  
9,1,3981.458333  
9,1,3171.193182  
9,1,1718.250000  
9,1,2071.280488  
9,1,1567.831250  
9,1,2857.750000  
9,1,3457.294118  
9,1,3976.436111  
9,1,2021.161290  
9,1,17148.906250  
9,1,4074.773649  
9,1,7401.593750  
9,1,4669.419118  
9,1,8561.864130  
9,1,10457.543478  
9,1,6007.442500  
9,1,14350.640000  
9,1,5258.275735  
9,1,3985.567568  
9,1,5805.365385  
9,1,2505.390957  
9,1,5900.333333  
9,1,18004.520833  
9,1,2817.037500  
9,1,18621.000000  
9,1,3492.441176  
9,1,1942.979167  
9,1,2720.621951  
9,1,1672.053571  
9,1,3347.342262  
9,1,2531.144886  
9,1,4441.255319  
9,1,2071.470395  
9,1,1718.067857  
9,1,2120.081522  
9,1,3652.512195  
9,1,10223.023256  
9,1,4500.476562  
9,1,2483.056818  
9,1,4065.000000  
9,1,16161.736842  
9,1,1703.298780  
9,1,1869.507812

9,1,2564.010417  
9,1,2387.000000  
9,1,1672.888889  
9,1,1816.662500  
9,1,9672.502717  
9,1,12704.357143  
9,1,19185.336957  
9,1,3610.274390  
9,1,2941.526596  
9,1,2446.300676  
9,1,5872.468750  
9,1,1543.284091  
9,1,3231.042683  
9,1,2645.044444  
9,1,6990.076613  
9,1,7667.503378  
9,1,2323.902439  
9,1,4086.722222  
9,1,15344.793919  
9,1,2964.003571  
9,1,11966.765957  
9,1,3401.972973  
9,1,5381.333333  
9,1,4027.125000  
9,1,5360.570000  
9,1,1799.932692  
9,1,1637.334559  
9,1,4847.946429  
9,1,2177.803191  
9,1,3670.875000  
9,1,11268.378378  
9,1,3494.362903  
9,1,5007.000000  
9,1,11524.455882  
9,1,2294.504237  
9,1,1807.060976  
9,1,8652.009615  
9,1,2186.228261  
9,1,1593.372093  
9,1,1996.315217  
9,1,2033.519231  
9,1,4850.473837  
9,1,3588.920139  
9,1,7389.602273  
9,1,2206.125000  
9,1,4416.828947  
9,1,8719.394737  
9,1,3225.433333  
9,1,1994.765000  
9,1,11142.390625  
9,1,1770.852273  
9,1,5807.264706  
9,1,4123.148810  
9,1,6507.629464  
9,1,1551.187500  
9,1,2044.917763  
9,1,1838.917553  
9,1,3051.474432  
9,1,5143.755682  
9,1,1797.273810  
9,1,1524.888587  
9,1,1989.559211  
9,1,1823.700000  
9,1,4785.770000  
9,1,1566.713542  
9,1,16717.266667

9,1,2535.168605  
9,1,9139.383929  
9,1,7498.339744  
9,1,3702.649390  
9,1,11261.671875  
9,1,3295.908333  
9,1,1990.804688  
9,1,2151.841463  
9,1,1663.500000  
9,1,1606.654412  
9,1,12867.031250  
9,1,2080.093750  
9,1,7701.125000  
9,1,8187.000000  
9,1,2503.951220  
9,1,2951.371795  
9,1,1918.076705  
9,1,11947.111111  
9,1,2099.365625  
9,1,2153.317935  
9,1,3192.987500  
9,1,11669.887500  
9,1,1689.816176  
9,1,3591.500000  
9,1,12046.608696  
9,1,9347.839286  
9,1,7994.700000  
9,1,2711.915441  
9,1,5153.106383  
9,1,4938.006757  
9,1,1598.238095  
9,1,14935.888587  
9,1,1921.948864  
9,1,2169.811111  
9,1,1834.727273  
9,1,5464.821429  
9,1,2583.361702  
9,1,6835.053191  
9,1,1696.769231  
9,1,1789.109848  
9,1,1554.000000  
9,1,2350.978723  
9,1,8722.864362  
9,1,4365.574405  
9,1,5075.725000  
9,1,9925.500000  
9,1,13685.975610  
9,1,2787.336207  
9,1,4923.760870  
9,1,3072.886364  
9,1,1981.338415  
9,1,1840.055921  
9,1,2542.674342  
9,1,9214.875000  
9,1,2173.943182  
9,1,1747.000000  
9,1,10102.658537  
9,1,3978.975610  
9,1,18364.147727  
9,1,2376.546875  
9,1,2354.461538  
9,1,4356.020833  
9,1,4082.402778  
9,1,2139.582237  
9,1,2295.312500  
9,1,6951.596154

9,1,3617.684211  
9,1,1615.862500  
9,1,15367.818182  
9,1,1623.020270  
9,1,6512.083333  
9,1,2254.283537  
9,1,17748.000000  
9,1,7389.003289  
9,1,10441.900510  
9,1,7632.282051  
9,1,2897.000000  
9,1,14196.802632  
9,1,2076.489362  
9,1,6414.670732  
9,1,4630.272727  
9,1,4033.803279  
9,1,9902.682927  
9,1,1580.176471  
9,1,2758.207317  
9,1,4603.078125  
9,1,1745.242188  
9,1,6556.241071  
9,1,6891.769737  
9,1,2551.916667  
9,1,4200.979167  
9,1,3273.054054  
9,1,1588.923077  
9,1,12995.230769  
9,1,5169.690000  
9,1,4066.134615  
9,1,2108.440217  
9,1,4163.447368  
9,1,4258.438830  
9,1,6621.308824  
9,1,6819.086538  
9,1,2755.134146  
9,1,1838.445946  
9,1,2835.184524  
9,1,3069.642857  
9,1,7646.853448  
9,1,2610.382576  
9,1,2832.650000  
9,1,4112.000000  
9,1,11846.958333  
9,1,2944.575581  
9,1,3272.783537  
9,1,2833.589286  
9,1,4970.261628  
9,1,3924.028846  
9,1,13003.519231  
9,1,1993.070946  
9,1,7014.210366  
9,1,6636.553030  
9,1,1834.165323  
9,1,2279.840000  
9,1,2065.171875  
9,1,1685.500000  
9,1,1679.851562  
9,1,2727.916667  
9,1,11593.375000  
9,1,16114.913889  
9,1,3564.099359  
9,1,8765.335366  
9,1,1776.422619  
9,1,1921.358974  
9,1,16507.111842

9,1,2465.939394  
9,1,6441.406250  
9,1,3452.878049  
9,1,4496.593750  
9,1,2812.793478  
9,1,8160.659722  
9,1,2382.568182  
9,1,2675.294118  
9,1,1707.367021  
9,1,2099.500000  
9,1,9792.166667  
9,1,2383.330882  
9,1,7668.512195  
9,1,3298.140625  
9,1,7680.222222  
9,1,1765.227941  
9,1,2443.595238  
9,1,4715.583333  
9,1,3138.910714  
9,1,2052.897059  
9,1,2266.175000  
9,1,4767.686275  
9,1,4442.767442  
9,1,2661.422619  
9,1,1639.964286  
9,1,4349.727273  
9,1,3969.902174  
9,1,2385.031250  
9,1,2324.630682  
9,1,7093.795455  
9,1,3794.022727  
9,1,6484.064516  
9,1,1556.195946  
9,1,2148.310976  
9,1,3664.775000  
9,1,1961.682432  
9,1,3644.741007  
9,1,2770.401163  
9,1,5236.178191  
9,1,6452.250000  
9,1,2687.440104  
9,1,4452.808511  
9,1,1512.541667  
9,1,4654.933333  
9,1,2393.977778  
9,1,7358.210106  
9,1,1697.553571  
9,1,2726.764205  
9,1,1984.908088  
9,1,2222.800000  
9,1,6173.852941  
9,1,6589.355114  
9,1,1502.886364  
9,1,2334.044355  
9,1,8690.359375  
9,1,6911.526596  
9,1,6920.593750  
9,1,10364.791667  
9,1,12381.500000  
9,1,18254.000000  
9,1,7029.580882  
9,1,1992.038462  
9,1,6412.433333  
9,1,2600.466216  
9,1,1511.571429  
9,1,1802.666667

9,1,3886.839674  
9,1,2290.763889  
9,1,8471.662879  
9,1,5002.425000  
9,1,3541.877907  
9,1,2862.578125  
9,1,2092.244186  
9,1,1651.453947  
9,1,18945.242424  
9,1,8866.375000  
9,1,3299.330882  
9,1,6700.051471  
9,1,1732.651163  
9,1,4613.563776  
9,1,5178.426829  
9,1,2981.917683  
9,1,9971.563596  
9,1,2681.322917  
9,1,3863.500000  
9,1,1722.585366  
9,1,2567.658537  
9,1,6079.010000  
9,1,1583.268750  
9,1,14129.647059  
9,1,5063.228448  
9,1,5311.515152  
9,1,13166.650000  
9,1,1887.820000  
9,1,2238.625000  
9,1,5954.774194  
9,1,18137.039062  
9,1,2794.000000  
9,1,3041.650000  
9,1,19821.666667  
9,1,1552.396277  
9,1,4482.419355  
9,1,2424.484756  
9,1,5124.586957  
9,1,5971.635417  
9,1,14213.545732  
9,1,2207.573171  
9,1,1914.888158  
9,1,1737.222973  
9,1,2395.297297  
9,1,11517.816667  
9,1,6721.502315  
9,1,9545.939024  
9,1,12694.115385  
9,1,2209.841837  
9,1,5240.200000  
9,1,13055.409091  
9,1,2399.750000  
9,1,4133.396341  
9,1,1656.183594  
9,1,5072.348837  
9,1,3752.650000  
9,1,19234.659574  
9,1,3279.756944  
9,1,2003.810484  
9,1,3122.000000  
9,1,2298.274390  
9,1,9583.903226  
9,1,2841.677419  
9,1,1754.302632  
9,1,2001.947368  
9,1,7179.941176

9,1,6406.153846  
9,1,2285.744565  
9,1,3110.228571  
9,1,9196.413043  
9,1,4146.346154  
9,1,4760.412500  
9,1,3922.006667  
9,1,3007.562500  
9,1,3455.906250  
9,1,3256.054348  
9,1,6697.477941  
9,1,6279.285714  
9,1,1868.322581  
9,1,11972.962766  
9,1,19885.250000  
9,1,3627.204545  
9,1,10053.375000  
9,1,2757.647727  
9,1,13379.205357  
9,1,6613.270833  
9,1,7545.353723  
9,1,4843.402439  
9,1,16893.833333  
9,1,3834.250000  
9,1,18197.716216  
9,1,7262.500000  
9,1,3036.602941  
9,1,2443.520349  
9,1,6852.583333  
9,1,7232.944444  
9,1,3996.230263  
9,1,2027.250000  
9,1,1636.182927  
9,1,2866.404891  
9,1,2100.404070  
9,1,16119.136364  
9,1,2352.478448  
9,1,12331.898438  
9,1,2130.585366  
9,1,2014.269737  
9,1,2313.012500  
9,1,3001.743243  
9,1,2713.116071  
9,1,1629.522727  
9,1,1753.707447  
9,1,8623.262821  
9,1,3858.500000  
9,1,5879.808824  
9,1,5189.540000  
9,1,19478.572917  
9,1,1746.254167  
9,1,3162.489130  
9,1,3886.932692  
9,1,2183.277778  
9,1,12377.958333  
9,1,1630.562500  
9,1,1871.904762  
9,1,10633.787791  
9,1,2583.529255  
9,1,13287.914286  
9,1,16690.800000  
9,1,2677.613636  
9,1,2780.487805  
9,1,2268.772059  
9,1,4172.875000  
9,1,3436.263158

9,1,2481.517857  
9,1,2172.554054  
9,1,2219.850000  
9,1,2963.016304  
9,1,1612.186047  
9,1,8525.576531  
9,1,17456.062500  
9,1,3759.986607  
9,1,5110.725000  
9,1,5145.023438  
9,1,1771.347222  
9,1,4914.966667  
9,1,3154.062500  
9,1,2041.166667  
9,1,4578.018868  
9,1,9330.922297  
9,1,1620.000000  
9,1,15621.179348  
9,1,2504.508197  
9,1,2086.862500  
9,1,4235.226190  
9,1,4473.794118  
9,1,1990.305556  
9,1,3131.413194  
9,1,15018.125000  
9,1,10291.625000  
9,1,1864.321429  
9,1,6509.122024  
9,1,2429.566667  
9,1,1501.698864  
9,1,2318.488372  
9,1,5733.279255  
9,1,6175.674419  
9,1,2826.670732  
9,1,4210.335227  
9,1,1894.632143  
9,1,4094.099057  
9,1,4860.940789  
9,1,3980.580645  
9,1,8828.369186  
9,1,5592.021429  
9,1,3450.233333  
9,1,3517.602273  
9,1,3690.888889  
9,1,1712.640625  
9,1,7354.560976  
9,1,3869.179487  
9,1,5387.217742  
9,1,3185.154762  
9,1,2112.072115  
9,1,1891.114130  
9,1,1648.345238  
9,1,3951.846154  
9,1,1893.634615  
9,1,7375.173077  
9,1,1635.264535  
9,1,3929.034375  
9,1,3515.331395  
9,1,4834.621951  
9,1,4136.755102  
9,1,2178.731707  
9,1,5756.904412  
9,1,1729.718750  
9,1,2052.562500  
9,1,1764.366848  
9,1,4399.977273

9,1,2310.712766  
9,1,10110.794811  
9,1,8279.217262  
9,1,2066.601744  
9,1,1819.193548  
9,1,5418.720000  
9,1,7492.890244  
9,1,4346.189189  
9,1,3604.312500  
9,1,8065.125000  
9,1,1583.292857  
9,1,4526.533333  
9,1,15791.887500  
9,1,1864.481481  
9,1,7053.459375  
9,1,2523.407895  
9,1,2808.672794  
9,1,6889.875000  
9,1,4146.354839  
9,1,2707.526316  
9,1,4255.177778  
9,1,1806.854651  
9,1,3345.520161  
9,1,8195.472222  
9,1,4510.518617  
9,1,2200.697222  
9,1,3848.045732  
9,1,11805.640625  
9,1,2015.137097  
9,1,1811.171429  
9,1,3447.735119  
9,1,1671.917857  
9,1,17632.586806  
9,1,7838.566667  
9,1,18593.533333  
9,1,2944.831395  
9,1,5606.648438  
9,1,2525.194444  
9,1,3213.821875  
9,1,3066.368243  
9,1,7274.833333  
9,1,7982.395408  
9,1,1875.170732  
9,1,1898.356383  
9,1,1617.674107  
9,1,1584.204545  
9,1,2946.636364  
9,1,3621.166667  
9,1,2878.638587  
9,1,1795.444444  
9,1,2311.164894  
9,1,1638.057143  
9,1,9760.638889  
9,1,3619.321429  
9,1,6670.283784  
9,1,19328.250000  
9,1,12007.371795  
9,1,4992.177326  
9,1,3831.500000  
9,1,2370.500000  
9,1,7549.289474  
9,1,1870.666667  
9,1,5678.150000  
9,1,3497.650000  
9,1,2563.353571  
9,1,7578.595238

9,1,2255.486111  
9,1,2389.833333  
9,1,1908.913462  
9,1,8249.330357  
9,1,2455.645349  
9,1,8387.232558  
9,1,1601.951220  
9,1,6255.910256  
9,1,7562.421875  
9,1,2405.718085  
9,1,8387.572289  
9,1,15035.835937  
9,1,17769.628571  
9,1,1998.000000  
9,1,13160.384146  
9,1,3606.161290  
9,1,15673.073171  
9,1,2404.065789  
9,1,3515.416667  
9,1,2241.600000  
9,1,5395.312500  
9,1,4090.928571  
9,1,1504.278571  
9,1,1944.272727  
9,1,8173.857143  
9,1,1888.458333  
9,1,4211.437500  
9,1,13561.125000  
9,1,6167.270270  
9,1,2675.082500  
9,1,4064.446809  
9,1,2790.681250  
9,1,2664.951613  
9,1,3032.350000  
9,1,9131.568182  
9,1,4499.810714  
9,1,9700.976974  
9,1,2827.750000  
9,1,17982.473684  
9,1,3012.085366  
9,1,6975.317857  
9,1,2115.507143  
9,1,8533.741379  
9,1,6650.625000  
9,1,1816.700000  
9,1,3332.550000  
9,1,4249.791667  
9,1,2336.987500  
9,1,2531.820652  
9,1,2257.153846  
9,1,14719.117647  
9,1,1504.722222  
9,1,4214.899038  
9,1,2683.953488  
9,1,2763.211111  
9,1,3878.692308  
9,1,1723.516667  
9,1,1600.861842  
9,1,1852.193069  
9,1,3362.400000  
9,1,3679.128571  
9,1,2083.654891  
9,1,1809.838542  
9,1,1817.050000  
9,1,3348.818182  
9,1,5696.228448

9,1,3660.628571  
9,1,4378.552632  
9,1,6432.773810  
9,1,11652.437500  
9,1,6977.625000  
9,1,8033.875000  
9,1,15790.756410  
9,1,5106.558333  
9,1,2112.357143  
9,1,13651.663889  
9,1,2104.942771  
9,1,3262.687500  
9,1,15852.025000  
9,1,3101.888889  
9,1,6511.428571  
9,1,1624.250000  
9,1,1860.263514  
9,1,3144.365385  
9,1,6123.245098  
9,1,3851.250000  
9,1,4795.646341  
9,1,4998.250000  
9,1,8349.681818  
9,1,4338.728571  
9,1,3765.079787  
9,1,3824.875000  
9,1,4534.706081  
9,1,2974.695652  
9,1,18744.750000  
9,1,2124.700000  
9,1,3892.673077  
9,1,2006.257353  
9,1,2979.019531  
9,1,1863.372093  
9,1,4481.536111  
9,1,11993.406250  
9,1,2780.063830  
9,1,7089.037143  
9,1,19657.837838  
9,1,1785.341463  
9,1,8484.733333  
9,1,1858.005814  
9,1,2317.000000  
9,1,5612.991935  
9,1,2060.575000  
9,1,15788.758929  
9,1,5330.909884  
9,1,2807.756098  
9,1,1876.617647  
9,1,3386.846591  
9,1,1689.342105  
9,1,2336.339286  
9,1,16544.652174  
9,1,1577.500000  
9,1,1518.793103  
9,1,1815.544444  
9,1,1915.423077  
9,1,1877.772727  
9,1,1595.500000  
9,1,7635.700658  
9,1,5894.604651  
9,1,5022.614362  
9,1,11913.697368  
9,1,3719.967742  
9,1,2925.613636  
9,1,5081.250000

9,1,8788.837209  
9,1,1811.784091  
9,1,3196.379630  
9,1,1604.928125  
9,1,7716.159375  
9,1,7013.437500  
9,1,2456.506579  
9,1,2332.907609  
9,1,3187.161290  
9,1,2987.716463  
9,1,18139.107143  
9,1,6256.779070  
9,1,2485.750000  
9,1,3846.934375  
9,1,4463.937500  
9,1,1653.936275  
9,1,8919.247283  
9,1,18171.982558  
9,1,2235.058511  
9,1,2301.651316  
9,1,1971.593750  
9,1,7186.410000  
9,1,6564.257576  
9,1,9168.648026  
9,1,4247.380435  
9,1,3776.372093  
9,1,3467.125000  
9,1,2374.617021  
9,1,2802.611111  
9,1,13546.573980  
9,1,2888.850694  
9,1,6149.796875  
9,1,3106.965517  
9,1,3988.931122  
9,1,7126.400000  
9,1,7541.727273  
9,1,3363.588889  
9,1,1728.338235  
9,1,2637.539773  
9,1,3010.723529  
9,1,1907.177632  
9,1,6294.151163  
9,1,5899.607955  
9,1,2771.725490  
9,1,2349.741667  
9,1,6349.215909  
9,1,1520.317073  
9,1,3904.756579  
9,1,13492.564103  
9,1,2487.802632  
9,1,2074.210106  
9,1,2251.784091  
9,1,1720.821429  
9,1,2565.590000  
9,1,3480.097222  
9,1,2289.853659  
9,1,2085.471875  
9,1,4217.522436  
9,1,1808.588235  
9,1,2079.034091  
9,1,1875.651685  
9,1,1933.784375  
9,1,10657.119048  
9,1,1859.517157  
9,1,10031.173077  
9,1,2133.868421

9,1,5108.312500  
9,1,3305.950000  
9,1,6631.064024  
9,1,2432.847826  
9,1,9270.531915  
9,1,2688.372222  
9,1,2087.329787  
9,1,6621.314286  
9,1,5193.198370  
9,1,3191.397436  
9,1,10542.546875  
9,1,1995.609375  
9,1,4745.110465  
9,1,9485.667969  
9,1,3684.867347  
9,1,1717.556818  
9,1,1762.996951  
9,1,1620.456395  
9,1,2596.375000  
9,1,7892.677632  
9,1,2550.750000  
9,1,8990.394737  
9,1,3904.049342  
9,1,1939.854839  
9,1,2071.863281  
9,1,6737.084239  
9,1,10448.929487  
9,1,7741.022059  
9,1,6987.428571  
9,1,11390.910326  
9,1,1652.654412  
9,1,1709.786932  
9,1,4941.286585  
9,1,2696.923077  
9,1,10437.432870  
9,1,1813.343750  
9,1,2090.676471  
9,1,3846.313953  
9,1,3367.800000  
9,1,19770.517241  
9,1,1701.437500  
9,1,1983.090909  
9,1,3122.773437  
9,1,1614.816860  
9,1,13040.142857  
9,1,12637.087500  
9,1,11674.738889  
9,1,3186.517857  
9,1,3449.297297  
9,1,12952.500000  
9,1,2943.118421  
9,1,13682.443182  
9,1,16408.406250  
9,1,3747.125000  
9,1,5638.010870  
9,1,2460.387500  
9,1,2187.218750  
9,1,1551.777439  
9,1,1583.442935  
9,1,1650.146552  
9,1,3102.027027  
9,1,11465.338235  
9,1,5602.625000  
9,1,1921.099265  
9,1,1968.978659  
9,1,2362.604651

9,1,2063.370968  
9,1,10002.571429  
9,1,1571.805147  
9,1,11438.953947  
9,1,2675.355556  
9,1,1798.343750  
9,1,17283.680147  
9,1,11471.808140  
9,1,2519.000000  
9,1,5390.500000  
9,1,7276.969388  
9,1,2003.234375  
9,1,2874.287500  
9,1,1543.709302  
9,1,3852.534884  
9,1,2027.829412  
9,1,1866.919643  
9,1,16910.875000  
9,1,1931.437500  
9,1,3122.358333  
9,1,1887.561224  
9,1,4996.061170  
9,1,2977.250000  
9,1,4954.150000  
9,1,4924.843085  
9,1,3273.000000  
9,1,6576.250000  
9,1,6605.497549  
9,1,2343.836957  
9,1,2387.882353  
9,1,4009.898256  
9,1,1631.304348  
9,1,14069.520161  
9,1,3580.828571  
9,1,1765.975000  
9,1,7189.888889  
9,1,2547.635135  
9,1,1680.668478  
9,1,15509.000000  
9,1,1611.261905  
9,1,2797.576087  
9,1,3216.222222  
9,1,5627.291667  
9,1,2234.828488  
9,1,2879.755682  
9,1,3262.187500  
9,1,5142.658784  
9,1,4967.408088  
9,1,10726.272727  
9,1,2726.069767  
10,2,1934.250000  
10,2,1859.338235  
10,2,1852.470588  
10,2,2094.134146  
10,2,1604.375000  
10,2,7101.704167  
10,2,4066.242347  
10,2,1658.168367  
10,2,2156.692308  
10,2,1500.118750  
10,2,3016.224359  
10,2,2483.795918  
10,2,2831.404762  
10,2,3266.696078  
10,2,1820.848214  
10,2,1563.403846

10,2,1879.896341  
10,2,3101.256098  
10,2,2510.437500  
10,2,2497.807870  
10,2,1744.528409  
10,2,2084.947674  
10,2,2235.756579  
10,2,4518.753906  
10,2,1845.142442  
10,2,1602.093750  
10,2,2738.365854  
10,2,1999.265625  
10,2,2283.272727  
10,2,3877.353659  
10,2,9206.506944  
10,2,1725.675000  
10,2,3403.022727  
10,2,2908.585366  
10,2,1894.708333  
10,2,1857.021277  
10,2,1948.004717  
10,2,2081.923077  
10,2,5321.094595  
10,2,1714.847222  
10,2,1838.576389  
10,2,1602.950000  
10,2,1914.115854  
10,2,1635.316176  
10,2,1816.108696  
10,2,1761.768617  
10,2,2031.436170  
10,2,1859.945122  
10,2,3830.089286  
10,2,3166.346774  
10,2,2457.238220  
10,2,2753.316038  
10,2,2023.065789  
10,2,2015.336735  
10,2,2776.581395  
10,2,7769.492424  
10,2,1666.781250  
10,2,4408.186170  
10,2,1915.589674  
10,2,1534.460106  
10,2,1994.437500  
10,2,2874.859375  
10,2,1907.571429  
10,2,1826.658854  
10,2,1570.264706  
10,2,3750.525000  
10,2,1766.775510  
10,2,1613.305921  
10,2,3892.809524  
10,2,4966.263514  
10,2,2232.226064  
10,2,2090.687500  
10,2,1620.015625  
10,2,2407.444767  
10,2,1736.692308  
10,2,1875.185897  
10,2,2020.521226  
10,2,2616.909375  
10,2,2074.847222  
10,2,3088.708333  
10,2,1598.707547  
10,2,2254.540541

10,2,1662.505952  
10,2,2278.747449  
10,2,2310.250000  
10,2,1901.506098  
10,2,3826.153846  
10,2,1836.250000  
10,2,1713.537736  
10,2,1725.379808  
10,2,1526.975000  
10,2,1739.567073  
10,2,2468.181122  
10,2,3172.442708  
10,2,2056.869186  
10,2,1530.807927  
10,2,2816.066176  
10,2,1576.902500  
10,2,2192.653409  
10,2,1796.017857  
10,2,4347.952128  
10,2,1876.457447  
10,2,2205.101562  
10,2,2021.068182  
10,2,1521.347826  
10,2,2178.268293  
10,2,2094.612500  
10,2,1586.487805  
10,2,2259.711735  
10,2,1666.937500  
10,2,3134.000000  
10,2,3019.862069  
10,2,2883.107143  
10,2,2687.434524  
10,2,8572.523810  
10,2,1681.404762  
10,2,1539.256250  
10,2,3505.625000  
10,2,1545.875000  
10,2,3171.166667  
10,2,2732.130000  
10,2,2079.750000  
10,2,1932.768293  
10,2,4071.571429  
10,2,1554.875000  
10,2,1860.522059  
10,2,1651.255814  
10,2,1627.657143  
10,2,3056.503676  
10,2,2151.264706  
10,2,1560.596859  
10,2,1757.025000  
10,2,2059.107143  
10,2,5462.177500  
10,2,3879.698529  
10,2,2284.024457  
10,2,2343.650000  
10,2,1720.776786  
10,2,2521.020000  
10,2,2176.565789  
10,2,2404.645833  
10,2,2264.330645  
10,2,1587.400000  
10,2,1764.812500  
10,2,1741.843023  
10,2,2693.862500  
10,2,1590.975610  
10,2,2154.076220

10,2,1831.134615  
10,2,4637.776786  
10,2,15317.866667  
10,2,1605.500000  
10,2,1614.764205  
10,2,8269.310811  
10,2,2587.026786  
10,2,7159.039062  
10,2,2423.508929  
10,2,1776.613636  
10,2,1842.400000  
10,2,3255.790179  
10,2,1816.312500  
10,2,2703.750000  
10,2,2163.632353  
10,2,2137.136126  
10,2,1690.904762  
10,2,1775.601064  
10,2,3351.938889  
10,2,1877.771739  
10,2,3609.994681  
10,2,3038.456522  
10,2,2031.756098  
10,2,1808.678191  
10,2,2056.400000  
10,2,1873.062500  
10,2,1847.464286  
10,2,2765.234694  
10,2,1654.665541  
10,2,1878.756250  
10,2,2271.181034  
10,2,2578.251185  
10,2,2072.584821  
10,2,1520.211538  
10,2,1594.535714  
10,2,3602.642857  
10,2,2002.681122  
10,2,1878.250000  
10,2,14804.812500  
10,2,2246.120000  
10,2,1650.395349  
10,2,2719.864583  
10,2,1708.168478  
10,2,2052.326531  
10,2,1725.650000  
10,2,1527.193878  
10,2,4056.098214  
10,2,2679.608696  
10,2,1935.234375  
10,2,4063.002660  
10,2,1681.818182  
10,2,1846.561224  
10,2,1952.064394  
10,2,1827.984043  
10,2,2835.541667  
10,2,1613.428571  
10,2,2568.679245  
10,2,2334.744681  
10,2,2756.208333  
10,2,1844.684896  
10,2,1540.380952  
10,2,1646.710784  
10,2,3051.015000  
10,2,1558.881579  
10,2,11741.197674  
10,2,1919.250000

10,2,1605.848837  
10,2,2515.528409  
10,2,2148.466837  
10,2,1697.348214  
10,2,2098.200000  
10,2,1654.750000  
10,2,2063.785714  
10,2,1800.039062  
10,2,1957.608974  
10,2,2675.895000  
10,2,1544.105263  
10,2,1969.553571  
10,2,6390.515152  
10,2,2160.731707  
10,2,5514.305921  
10,2,3684.740385  
10,2,1909.662500  
10,2,2043.757075  
10,2,2204.705128  
10,2,1612.000000  
10,2,2027.208333  
10,2,1784.335366  
10,2,1893.176887  
10,2,1754.568750  
10,2,3266.272059  
10,2,1518.156250  
10,2,2834.750000  
10,2,1862.037500  
10,2,2092.625000  
10,2,4110.712838  
10,2,1623.878049  
10,2,3475.835938  
10,2,1691.443750  
10,2,1514.653125  
10,2,1529.796512  
10,2,4880.703947  
10,2,4344.048913  
10,2,2170.767857  
10,2,1639.625000  
10,2,1588.914894  
10,2,2304.500000  
10,2,1994.875000  
10,2,1945.367500  
10,2,2782.980769  
10,2,1728.285714  
10,2,1798.256098  
10,2,3358.119048  
10,2,2480.990000  
10,2,1697.235795  
10,2,2592.057377  
10,2,2515.384615  
10,2,1554.728448  
10,2,1818.293269  
10,2,2002.833333  
10,2,1773.143293  
10,2,6520.312500  
10,2,2705.871324  
10,2,10704.669118  
10,2,1621.232558  
10,2,1557.116848  
10,2,1885.600000  
10,2,2012.718750  
10,2,19770.500000  
10,2,2467.805288  
10,2,1867.450000  
10,2,1760.306373

10,2,2829.348837  
10,2,2468.333333  
10,2,1813.801136  
10,2,3232.906977  
10,2,1542.041667  
10,2,8053.346939  
10,2,2103.771429  
10,2,2601.594444  
10,2,1755.222826  
10,2,1674.943396  
10,2,1505.175000  
10,2,1568.743421  
10,2,1801.687500  
10,2,1923.820513  
10,2,2029.000000  
10,2,4667.875000  
10,2,1692.207447  
10,2,1693.448113  
10,2,1992.583333  
10,2,4585.250000  
10,2,1803.456522  
10,2,3284.795732  
10,2,3597.034314  
10,2,2456.117347  
10,2,2513.035326  
10,2,1611.000000  
10,2,2416.008333  
10,2,2151.975000  
10,2,1608.262500  
10,2,1575.442073  
10,2,5646.062500  
10,2,1820.375000  
10,2,2400.861702  
10,2,1950.281250  
10,2,2050.145833  
10,2,1513.673913  
10,2,1788.743902  
10,2,1548.903846  
10,2,1771.459302  
10,2,2459.260000  
10,2,1680.869565  
10,2,2243.216667  
10,2,5598.384615  
10,2,1691.291667  
10,2,1962.473684  
10,2,1734.819095  
10,2,1588.984043  
10,2,1772.039773  
10,2,3364.062500  
10,2,1746.807927  
10,2,3259.500000  
10,2,2615.452500  
10,2,1950.397959  
10,2,2348.941667  
10,2,1923.838235  
10,2,1504.043750  
10,2,1821.059524  
10,2,1543.922619  
10,2,2280.143443  
10,2,6624.199519  
10,2,2992.234375  
10,2,1867.567500  
10,2,1700.200000  
10,2,3437.460227  
10,2,2208.320000  
10,2,2905.057692

10,2,2484.750000  
10,2,2017.782738  
10,2,1826.785714  
10,2,1661.329268  
10,2,1545.755814  
10,2,3493.054545  
10,2,5398.044811  
10,2,2122.421512  
10,2,2010.500000  
10,2,1755.042500  
10,2,2798.284091  
10,2,2289.083333  
10,2,1619.395349  
10,2,7956.015306  
10,2,2386.734043  
10,2,2361.198980  
10,2,1701.600446  
10,2,5835.466912  
10,2,3140.875000  
10,2,2634.867925  
10,2,3703.639151  
10,2,5472.750000  
10,2,1522.750000  
10,2,2005.126582  
10,2,1505.125000  
10,2,1899.437500  
10,2,1613.062500  
10,2,5009.784884  
10,2,1559.780488  
10,2,2520.404255  
10,2,1588.519608  
10,2,1966.767500  
10,2,1510.806548  
10,2,2078.767857  
10,2,1618.039352  
10,2,5804.437500  
10,2,1653.613636  
10,2,1593.903302  
10,2,2979.467262  
10,2,4726.829787  
10,2,1620.906250  
10,2,1567.545455  
10,2,1534.080000  
10,2,2319.312500  
10,2,3009.762500  
10,2,1686.200000  
10,2,1861.333333  
10,2,3069.953125  
10,2,1883.195122  
10,2,7960.723684  
10,2,2416.850000  
10,2,1940.952703  
10,2,1824.250000  
10,2,3334.858974  
10,2,2083.640000  
10,2,2766.732143  
10,2,2092.682692  
10,2,2511.767857  
10,2,2396.283333  
10,2,1741.088235  
10,2,1924.011111  
10,2,1876.793750  
10,2,4142.545732  
10,2,10392.272727  
10,2,1800.951087  
10,2,1505.130208

10,2,2043.837500  
10,2,1615.703593  
10,2,1713.029070  
10,2,1975.907895  
10,2,4539.728261  
10,2,2159.381250  
10,2,3569.744681  
10,2,4791.814189  
10,2,1506.615385  
10,2,2181.125000  
10,2,1966.293750  
10,2,1865.389706  
10,2,1850.169444  
10,2,2175.674419  
10,2,2068.800000  
10,2,3233.956019  
10,2,1768.812500  
10,2,1644.027778  
10,2,2299.666667  
10,2,1561.631098  
10,2,1780.875000  
10,2,1628.133333  
10,2,1967.625000  
10,2,1528.094595  
10,2,4106.211538  
10,2,2309.768182  
10,2,3435.273026  
10,2,1955.526316  
10,2,2716.960000  
10,2,2541.081633  
10,2,1869.700000  
10,2,1938.243243  
10,2,1854.674242  
10,2,2118.590909  
10,2,1585.702381  
10,2,2156.175000  
10,2,3626.336310  
10,2,2228.345745  
10,2,3229.993750  
10,2,1614.548913  
10,2,2952.096154  
10,2,2302.315789  
10,2,1896.041667  
10,2,2171.198980  
10,2,2463.250000  
10,2,2913.135000  
10,2,2133.427500  
10,2,9486.275000  
10,2,2652.615854  
10,2,1587.173077  
10,2,2797.600000  
10,2,1631.047619  
10,2,1868.125000  
10,2,1820.726852  
10,2,2908.082386  
10,2,2382.848214  
10,2,2007.744048  
10,2,2395.273585  
10,2,1623.794643  
10,2,1999.585938  
10,2,1590.025510  
10,2,1974.755319  
10,2,3304.265957  
10,2,5639.111111  
10,2,3944.968750  
10,2,1553.951220

10,2,2041.530303  
10,2,1699.714286  
10,2,1946.880435  
10,2,2202.250000  
10,2,2656.653302  
10,2,1542.437500  
10,2,3383.128205  
10,2,2842.317073  
10,2,2029.562500  
10,2,1535.612179  
10,2,1842.610465  
10,2,1915.829268  
10,2,1519.187500  
10,2,2246.234375  
10,2,1591.475000  
10,2,2047.845745  
10,2,1782.000000  
10,2,2573.585227  
10,2,2669.687500  
10,2,2579.470000  
10,2,2507.558036  
10,2,1723.219512  
10,2,6217.941489  
10,2,2794.632653  
10,2,1648.162162  
10,2,1935.390244  
10,2,1517.337500  
10,2,4271.166667  
10,2,3070.950000  
10,2,1562.913043  
10,2,3123.155172  
10,2,5933.119898  
10,2,1574.321429  
10,2,1745.867188  
10,2,2025.215686  
10,2,2660.590909  
10,2,1522.560185  
10,2,3892.562500  
10,2,1735.990000  
10,2,2568.268229  
10,2,1533.738636  
10,2,1938.459459  
10,2,17673.441176  
10,2,2886.489362  
10,2,1707.204545  
10,2,17195.157143  
10,2,2154.573864  
10,2,2146.216216  
10,2,1647.923469  
10,2,1667.114286  
10,2,2042.744681  
10,2,1779.613971  
10,2,2313.784574  
10,2,2096.292763  
10,2,3624.219388  
10,2,1892.665000  
10,2,4319.722973  
10,2,1926.408537  
10,2,1513.655488  
10,2,2554.167683  
10,2,2355.226562  
10,2,1582.331250  
10,2,1857.500000  
10,2,2621.640625  
10,2,1750.033854  
10,2,1924.875000

10,2,1605.274306  
10,2,1528.442568  
10,2,3194.446429  
10,2,1975.894737  
10,2,5564.404605  
10,2,3493.161184  
10,2,1523.632979  
10,2,1706.133523  
10,2,1736.250000  
10,2,1701.618750  
10,2,5721.647727  
10,2,1992.080000  
10,2,1609.231707  
10,2,2416.357143  
10,2,2258.437500  
10,2,2340.273810  
10,2,1611.960227  
10,2,1921.188889  
10,2,2271.906250  
10,2,2083.413889  
10,2,1826.604167  
10,2,1995.916667  
10,2,1534.627660  
10,2,2440.346875  
10,2,2164.712766  
10,2,15818.692568  
10,2,2612.334559  
10,2,2592.032895  
10,2,1730.273026  
10,2,1974.502404  
10,2,2941.941176  
10,2,2801.566327  
10,2,2570.472500  
10,2,1972.093750  
10,2,1616.010638  
10,2,1642.875000  
10,2,2265.478448  
10,2,1726.985119  
10,2,1743.906780  
10,2,5363.312500  
10,2,1606.729592  
10,2,1932.016484  
10,2,2896.987500  
10,2,5020.031250  
10,2,3115.533537  
10,2,1546.500000  
10,2,2714.330000  
10,2,1863.973837  
10,2,1518.329082  
10,2,2147.771277  
10,2,1591.977941  
10,2,5924.000000  
10,2,2097.226190  
10,2,14966.558824  
10,2,1510.213542  
10,2,1516.062500  
10,2,1568.555556  
10,2,1891.754630  
10,2,3710.490566  
10,2,2496.938953  
10,2,1535.949468  
10,2,1737.372449  
10,2,2022.778846  
10,2,1887.078125  
10,2,3475.238095  
10,2,2045.250000

10,2,3038.695652  
10,2,3634.344059  
10,2,2363.294643  
10,2,1509.005952  
10,2,3400.652174  
10,2,1878.264881  
10,2,3085.445313  
10,2,1549.449468  
10,2,3166.718750  
10,2,1971.304688  
10,2,2133.658537  
10,2,1679.541667  
10,2,1611.823718  
10,2,1612.934783  
10,2,1668.150510  
10,2,2351.495370  
10,2,2784.508523  
10,2,2358.880952  
10,2,2010.569149  
10,2,2205.227041  
10,2,2015.000000  
10,2,1637.107143  
10,2,3560.069853  
10,2,1574.356132  
10,2,2357.095000  
10,2,1626.850000  
10,2,3692.732143  
10,2,1513.583333  
10,2,5318.675676  
10,2,4024.057692  
10,2,5344.725000  
10,2,1730.980000  
10,2,1810.688776  
10,2,2094.803879  
10,2,1604.508929  
10,2,2552.110000  
10,2,1541.392857  
10,2,13235.054688  
10,2,2729.803571  
10,2,3666.257812  
10,2,3192.367347  
10,2,2178.328125  
10,2,2441.426020  
10,2,2169.375000  
10,2,2337.666667  
10,2,1731.437500  
10,2,1609.601562  
10,2,4052.014286  
10,2,2495.138298  
10,2,1634.625000  
10,2,1572.270833  
10,2,1813.551136  
10,2,2630.340000  
10,2,1586.625000  
10,2,9797.486842  
10,2,1656.381818  
10,2,1626.473684  
10,2,2201.915441  
10,2,1603.700000  
10,2,1718.188725  
10,2,5258.170732  
10,2,2617.335106  
10,2,5083.884615  
10,2,2250.712500  
10,2,1670.642857  
10,2,1860.183824

10,2,1799.366071  
10,2,2156.295455  
10,2,1706.565476  
10,2,2274.693878  
10,2,3624.818182  
10,2,4047.354167  
10,2,2009.964286  
10,2,2998.421875  
10,2,2649.125000  
10,2,2182.803191  
10,2,2595.454545  
10,2,1832.872340  
10,2,2781.350962  
10,2,2068.416667  
10,2,5865.041667  
10,2,2284.776596  
10,2,1547.117021  
10,2,2944.059524  
10,2,1820.116848  
10,2,1866.475000  
10,2,2524.556122  
10,2,2288.337766  
10,2,1719.968750  
10,2,1759.100000  
10,2,1596.260638  
10,2,2716.833333  
10,2,2242.841216  
10,2,1748.329268  
10,2,3699.317130  
10,2,2125.089286  
10,2,3473.811111  
10,2,2749.819767  
10,2,1922.719512  
10,2,2982.578125  
10,2,1734.816176  
10,2,1877.336957  
10,2,1946.557927  
10,2,5527.739130  
10,2,1548.801724  
10,2,4340.523026  
10,2,1903.372642  
10,2,1574.480000  
10,2,1763.742647  
10,2,1572.379902  
10,2,1562.142857  
10,2,1598.187500  
10,2,2157.278646  
10,2,3169.500000  
10,2,1763.988095  
10,2,1874.464286  
10,2,1808.107143  
10,2,1901.925595  
10,2,1977.681548  
10,2,1777.858796  
10,2,1951.142857  
10,2,3534.032143  
10,2,2349.825000  
10,2,5036.122449  
10,2,1851.340909  
10,2,1995.428571  
10,2,1891.862500  
10,2,3461.481383  
10,2,2013.270833  
10,2,2908.803922  
10,2,2165.375000  
10,2,2726.426471

10,2,2539.404255  
10,2,17884.875000  
10,2,1681.109375  
10,2,2301.984091  
10,2,2199.075000  
10,2,2097.035714  
10,2,2143.522059  
10,2,2286.412500  
10,2,1721.770000  
10,2,2701.047872  
10,2,16905.750000  
10,2,7336.194313  
10,2,4089.937500  
10,2,1888.651786  
10,2,2544.609375  
10,2,1805.789474  
10,2,1833.553191  
10,2,4791.389881  
10,2,2161.232143  
10,2,1798.860795  
10,2,5997.085526  
10,2,2532.331250  
10,2,3216.693878  
10,2,2311.729167  
10,2,1797.957447  
10,2,1525.605263  
10,2,1590.096354  
10,2,1568.121951  
10,2,1826.620968  
10,2,2395.258929  
10,2,1693.446809  
10,2,3273.348039  
10,2,1846.285714  
10,2,2254.707317  
10,2,2178.091463  
10,2,2822.382812  
10,2,1560.799020  
10,2,1742.500000  
10,2,2068.125000  
10,2,3757.950000  
10,2,8428.311111  
10,2,12023.636111  
10,2,5530.000000  
10,2,2242.005319  
10,2,1823.250000  
10,2,1751.030612  
10,2,2081.833333  
10,2,1685.885204  
10,2,1510.333333  
10,2,3087.030556  
10,2,2375.541667  
10,2,1880.707447  
10,2,2136.166667  
10,2,1545.642857  
10,2,1798.636364  
10,2,1700.366667  
10,2,3061.375000  
10,2,2083.640244  
10,2,1934.890000  
10,2,1504.891509  
10,2,2909.171875  
10,2,4421.076087  
10,2,1811.441176  
10,2,3176.825000  
10,2,2754.500000  
10,2,1873.463415

10,2,4792.340426  
10,2,4671.064024  
10,2,3201.500000  
10,2,3396.842949  
10,2,2967.080357  
10,2,1647.677778  
10,2,1585.530556  
10,2,4183.723684  
10,2,3694.046512  
10,2,1743.351064  
10,2,1871.169643  
10,2,3706.302326  
10,2,2880.250000  
10,2,1638.110577  
10,2,1722.310976  
10,2,1747.788690  
10,2,1759.665816  
10,2,1583.679245  
10,2,2035.378571  
10,2,1700.164773  
10,2,2471.894737  
10,2,1797.976744  
10,2,2473.580357  
10,2,7605.230769  
10,2,2679.156250  
10,2,2066.971154  
10,2,2698.035714  
10,2,1504.378289  
10,2,2123.187500  
10,2,1503.587766  
10,2,1657.860000  
10,2,1652.687500  
10,2,1740.698370  
10,2,1503.894886  
10,2,2460.953125  
10,2,3300.179348  
10,2,2080.146277  
10,2,1558.139535  
10,2,2016.272727  
10,2,4954.125000  
10,2,1826.093750  
10,2,1654.897959  
10,2,1519.767045  
10,2,1740.378676  
10,2,1989.562500  
10,2,4345.975962  
10,2,1903.867021  
10,2,2395.614362  
10,2,5634.181818  
10,2,2101.426136  
10,2,4004.242857  
10,2,2065.486486  
10,2,2219.041667  
10,2,1569.414634  
10,2,1954.977273  
10,2,2431.583333  
10,2,1868.187500  
10,2,1625.211538  
10,2,1607.597826  
10,2,2052.535714  
10,2,2173.353261  
10,2,1575.634868  
10,2,2560.185185  
10,2,2150.210526  
10,2,6222.433594  
10,2,1676.827206

10,2,1707.909091  
10,2,1675.942073  
10,2,2173.641509  
10,2,1662.700000  
10,2,1898.853659  
10,2,2092.400000  
10,2,3475.935096  
10,2,1511.352564  
10,2,1613.564103  
10,2,1503.826531  
10,2,1677.836538  
10,2,1742.505556  
10,2,3932.078125  
10,2,3455.140957  
10,2,1576.953947  
10,2,2874.237245  
10,2,2603.233696  
10,2,2062.372449  
10,2,1708.000000  
10,2,1569.708333  
10,2,2747.309524  
10,2,2003.614796  
10,2,1879.594444  
10,2,1753.012195  
10,2,2039.295213  
10,2,1548.355978  
10,2,1571.571429  
10,2,1590.016204  
10,2,7063.875000  
10,2,4621.388889  
10,2,1912.781250  
10,2,8077.678571  
10,2,3291.852941  
10,2,1582.082317  
10,2,2239.370536  
10,2,2215.848837  
10,2,2179.243590  
10,2,1585.691327  
10,2,4894.046875  
10,2,4212.282051  
10,2,2160.794118  
10,2,2243.050000  
10,2,1563.666667  
10,2,2092.378125  
10,2,1581.851974  
10,2,2537.914894  
10,2,2070.138514  
10,2,1787.000000  
10,2,1521.875000  
10,2,2490.224359  
10,2,1613.571429  
10,2,2846.495614  
10,2,1818.586957  
10,2,1890.479592  
10,2,4121.480263  
10,2,4511.956633  
10,2,1548.339744  
10,2,1502.005814  
10,2,3088.631579  
10,2,1857.587963  
10,2,3380.332500  
10,2,2181.140000  
10,2,2700.276786  
10,2,5297.286765  
10,2,1838.833333  
10,2,2001.246795

10,2,1781.192073  
10,2,5525.698718  
10,2,3469.385475  
10,2,3018.601852  
10,2,2314.678571  
10,2,1499.351562  
10,2,2306.211538  
10,2,1574.116667  
10,2,3381.500000  
10,2,2044.207547  
10,2,2361.358974  
10,2,3114.063830  
10,2,2314.573529  
10,2,10684.733108  
10,2,1503.122340  
10,2,2584.310185  
10,2,1799.994565  
10,2,1745.558511  
10,2,1995.809896  
10,2,1778.828488  
10,2,2038.227941  
10,2,3170.692308  
10,2,1742.698864  
10,2,2018.750000  
10,2,2701.653846  
10,2,1821.022727  
10,2,3139.110119  
10,2,3403.244444  
10,2,1804.668367  
10,2,1988.382979  
10,2,3170.693182  
10,2,2272.091837  
10,2,2903.767857  
10,2,4266.927632  
10,2,1557.538462  
10,2,2430.943452  
10,2,2795.047872  
10,2,2671.201220  
10,2,1665.127841  
10,2,2660.948276  
10,2,2019.542553  
10,2,3525.400000  
10,2,5933.955128  
10,2,1670.031250  
10,2,1549.886364  
10,2,1574.500000  
10,2,1602.000000  
10,2,1647.156250  
10,2,1756.247396  
10,2,1884.484694  
10,2,1783.371528  
10,2,1594.956250  
10,2,2227.957386  
10,2,2273.819712  
10,2,3425.432870  
10,2,1553.100000  
10,2,1805.875000  
10,2,1724.009346  
10,2,2660.891892  
10,2,6705.089286  
10,2,1738.470588  
10,2,1551.804348  
10,2,2681.770000  
10,2,2528.482558  
10,2,1980.085526  
10,2,1676.587500

10,2,10589.975000  
10,2,1988.981250  
10,2,1528.656250  
10,2,2353.804545  
10,2,3601.622222  
10,2,9747.134375  
10,2,1690.072917  
10,2,1784.863095  
10,2,14297.975610  
10,2,7790.500000  
10,2,1688.808962  
10,2,1955.540909  
10,2,1958.197368  
10,2,2043.588710  
10,2,1763.562500  
10,2,1859.143617  
10,2,1818.810811  
10,2,2200.695652  
10,2,1759.712500  
10,2,2057.586735  
10,2,1691.931604  
10,2,1859.079268  
10,2,1967.187500  
10,2,1667.272059  
10,2,2159.163462  
10,2,2165.207447  
10,2,1629.213415  
10,2,1623.593750  
10,2,1636.593750  
10,2,3271.064189  
10,2,4294.500000  
10,2,4510.589286  
10,2,1681.339286  
10,2,1865.325000  
10,2,3605.534574  
10,2,1756.866279  
10,2,3215.303191  
10,2,3944.261111  
10,2,2132.107143  
10,2,2408.530000  
10,2,1645.925532  
10,2,1637.583333  
10,2,3171.000000  
10,2,1568.831250  
10,2,1616.452830  
10,2,2681.962963  
10,2,3471.418367  
10,2,1667.079545  
10,2,2652.224490  
10,2,2068.187500  
10,2,9980.835366  
10,2,1681.405488  
10,2,2612.000000  
10,2,2022.854167  
10,2,2995.800000  
10,2,4966.961538  
10,2,1746.450000  
10,2,1943.000000  
10,2,2863.940476  
10,2,2327.393750  
10,2,1936.215116  
10,2,2460.529070  
10,2,1663.718137  
10,2,1936.542553  
10,2,4783.620833  
10,2,2205.410326

10,2,1962.484694  
10,2,1978.280488  
10,2,2329.211957  
10,2,2009.627404  
10,2,5801.285714  
10,2,1662.030405  
10,2,10420.728070  
10,2,1608.280702  
10,2,2105.375000  
10,2,1662.397590  
10,2,2272.339744  
10,2,1732.970238  
10,2,2084.559524  
10,2,2331.127273  
10,2,1545.247093  
10,2,1983.770833  
10,2,1533.437500  
10,2,1738.625641  
10,2,5364.555556  
10,2,2461.500000  
10,2,2107.490196  
10,2,1756.941964  
10,2,1639.161765  
10,2,2268.429245  
10,2,2927.705882  
10,2,7687.789773  
10,2,5764.130435  
10,2,4497.116279  
10,2,1668.714286  
10,2,1557.341146  
10,2,2255.097561  
10,2,1923.213542  
10,2,2974.500000  
10,2,2436.179878  
10,2,1891.923913  
10,2,4852.456522  
10,2,1828.071429  
10,2,2673.118056  
10,2,2122.995098  
10,2,2553.950000  
10,2,1751.125000  
10,2,2505.073171  
10,2,1536.628049  
10,2,2018.724599  
10,2,1651.130952  
10,2,1671.395000  
10,2,1706.730978  
10,2,3859.177632  
10,2,1711.318452  
10,2,3601.238095  
10,2,2140.125000  
10,2,1922.214286  
10,2,2375.420000  
10,2,1617.000000  
10,2,1852.805556  
10,2,1577.794355  
10,2,1509.594595  
10,2,2896.500000  
10,2,2097.857143  
10,2,1692.375000  
10,2,2778.000000  
10,2,1712.299419  
10,2,1931.936170  
10,2,1772.418605  
10,2,2637.153409  
10,2,1817.229730

10,2,3109.250000  
10,2,3838.923077  
10,2,2446.346154  
10,2,1804.035088  
10,2,1668.000000  
10,2,2965.494681  
10,2,1660.436170  
10,2,1808.200000  
10,2,8640.839744  
10,2,1899.740000  
10,2,5332.057692  
10,2,2116.622093  
10,2,2002.139423  
10,2,1574.812500  
10,2,2804.294118  
10,2,1698.110119  
10,2,2096.833333  
10,2,5782.216912  
10,2,1703.132653  
10,2,2071.393382  
10,2,2536.335106  
10,2,2030.925000  
10,2,3208.007353  
10,2,3188.500000  
10,2,1740.145833  
10,2,1609.463415  
10,2,1691.073171  
10,2,3934.473837  
10,2,2133.829268  
10,2,2617.275000  
10,2,2108.025641  
10,2,1608.698529  
10,2,1605.490196  
10,2,1606.455556  
10,2,3706.784091  
10,2,1500.505319  
10,2,1716.632653  
10,2,2651.617188  
10,2,2253.200000  
10,2,1565.556250  
10,2,1864.463889  
10,2,4994.452500  
10,2,4117.781915  
10,2,4182.200000  
10,2,1743.422222  
10,2,1737.965116  
10,2,1754.000000  
10,2,1806.250000  
10,2,2825.722973  
10,2,2068.895000  
10,2,2602.637755  
10,2,2956.375000  
10,2,3126.716912  
10,2,2037.213235  
10,2,1516.733333  
10,2,4029.000000  
10,2,2367.441176  
10,2,4100.357955  
10,2,1515.365854  
10,2,7887.436047  
10,2,1782.931250  
10,2,2183.416667  
10,2,2369.983333  
10,2,2677.602273  
10,2,1564.772727  
10,2,1538.523437

10,2,4102.780000  
10,2,1689.714286  
10,2,2657.657143  
10,2,2194.000000  
10,2,2102.272727  
10,2,1961.365625  
10,2,5180.301887  
10,2,2525.000000  
10,2,1707.760000  
10,2,5411.257212  
10,2,3122.052326  
10,2,2537.932432  
10,2,2131.885417  
10,2,1516.721591  
10,2,1546.984375  
10,2,2161.302326  
10,2,2605.292553  
10,2,2217.401596  
10,2,2067.940909  
10,2,1668.964286  
10,2,6872.830508  
10,2,1523.678571  
10,2,2521.784091  
10,2,1812.321875  
10,2,7568.390244  
10,2,2014.257812  
10,2,1979.250000  
10,2,2131.347561  
10,2,6791.590909  
10,2,2148.552778  
10,2,3709.375000  
10,2,2092.250000  
10,2,1527.875000  
10,2,1567.750000  
10,2,1942.552885  
10,2,1818.149390  
10,2,3281.473684  
10,2,2359.545455  
10,2,1834.621429  
10,2,2304.770833  
10,2,2669.339674  
10,2,1592.686047  
10,2,1759.062500  
10,2,1574.718085  
10,2,3237.087209  
10,2,1582.094444  
10,2,1597.292553  
10,2,1507.337838  
10,2,2120.206395  
10,2,3313.935714  
10,2,1731.573718  
10,2,2619.483871  
10,2,1584.633333  
10,2,2194.486364  
10,2,1842.324468  
10,2,2034.934783  
10,2,2808.425000  
10,2,2241.310000  
10,2,2572.687500  
10,2,4590.313953  
10,2,3017.805233  
10,2,1515.687500  
10,2,1780.577381  
10,2,1792.816667  
10,2,1523.016667  
10,2,3194.375000

10,2,2624.058824  
10,2,1575.182692  
10,2,2158.052632  
10,2,2887.097222  
10,2,3384.472561  
10,2,1770.941176  
10,2,2393.234375  
10,2,4525.087500  
10,2,2157.946429  
10,2,2341.961538  
10,2,1514.448276  
10,2,2610.108173  
10,2,2379.958333  
10,2,1686.196429  
10,2,2475.092391  
10,2,17333.530612  
10,2,1562.107143  
10,2,2093.325472  
10,2,2165.985577  
10,2,2404.182927  
10,2,2367.791667  
10,2,1613.821429  
10,2,2436.338816  
10,2,1552.877907  
10,2,1515.637500  
10,2,1560.451923  
10,2,3283.543269  
10,2,3136.529661  
10,2,5850.919492  
10,2,1636.392857  
10,2,2004.169118  
10,2,1787.474138  
10,2,1732.428571  
10,2,5324.952096  
10,2,1572.743421  
10,2,1556.138587  
10,2,2142.380435  
10,2,3597.951754  
10,2,2415.863636  
10,2,1685.962766  
10,2,1532.794872  
10,2,5081.154762  
10,2,1669.583333  
10,2,1502.994186  
10,2,2208.444767  
10,2,6145.314904  
10,2,2663.391304  
10,2,2353.433333  
10,2,3401.744681  
10,2,3163.447917  
10,2,2467.336538  
10,2,1855.325000  
10,2,2243.903125  
10,2,2116.028571  
10,2,1645.052885  
10,2,2903.743750  
10,2,3339.000000  
10,2,2262.781250  
10,2,3073.270000  
10,2,2183.390135  
10,2,2086.989796  
10,2,2232.898936  
10,2,1535.950000  
10,2,1776.614362  
10,2,1840.071429  
10,2,1556.258065

10,2,2150.447917  
10,2,1540.709302  
10,2,1502.648649  
10,2,1790.458333  
10,2,1549.127451  
10,2,13665.487179  
10,2,1691.000000  
10,2,1636.184783  
10,2,2106.609756  
10,2,1664.157500  
10,2,2326.900735  
10,2,2500.612179  
10,2,5229.894737  
10,2,2579.869565  
10,2,2002.070652  
10,2,7152.037736  
10,2,1727.740566  
10,2,2121.493902  
10,2,1853.942308  
10,2,3098.093750  
10,2,1634.122642  
10,2,2086.658333  
10,2,1918.728774  
10,2,1665.190476  
10,2,1783.148810  
10,2,1536.657895  
10,2,3568.642857  
10,2,8911.545455  
10,2,1628.777778  
10,2,2557.525000  
10,2,1967.794118  
10,2,1579.365385  
10,2,1527.209239  
10,2,1953.625000  
10,2,3932.654891  
10,2,2045.357143  
10,2,4073.398936  
10,2,2712.734694  
10,2,2025.175532  
10,2,2815.510870  
10,2,2512.650000  
10,2,2787.416667  
10,2,3512.023438  
10,2,1511.231250  
10,2,2674.341463  
10,2,10526.657407  
10,2,2621.797414  
10,2,2125.214286  
10,2,2965.166667  
10,2,1937.298387  
10,2,2055.829545  
10,2,3646.125000  
10,2,2712.395408  
10,2,1993.622449  
10,2,1668.817857  
10,2,1653.563953  
10,2,1913.578125  
10,2,7996.011364  
10,2,2024.823529  
10,2,2361.000000  
10,2,2000.375000  
10,2,2170.687500  
10,2,2382.992021  
10,2,1977.195000  
10,2,4300.572500  
10,2,1776.463235

10,2,2169.679348  
10,2,2019.025000  
10,2,3095.982500  
10,2,1618.871951  
10,2,1941.117925  
10,2,1647.182692  
10,2,2123.735465  
10,2,3312.200000  
10,2,1839.294118  
10,2,3488.774457  
10,2,1622.259259  
10,2,1701.500000  
10,2,1948.361702  
10,2,2318.688889  
10,2,1544.813725  
10,2,1989.285326  
10,2,2568.000000  
10,2,1926.675000  
10,2,1658.024390  
10,2,1614.416667  
10,2,2067.733333  
10,2,1514.902439  
10,2,1954.833333  
10,2,1526.637500  
10,2,2470.750000  
10,2,2031.757979  
10,2,2292.318396  
10,2,1558.986842  
10,2,1668.591837  
10,2,3017.852273  
10,2,3113.067708  
10,2,2541.419118  
10,2,1985.295455  
10,2,1507.850000  
10,2,1613.000000  
10,2,2536.798246  
10,2,2848.531915  
10,2,1701.601064  
10,2,2082.779762  
10,2,1959.020000  
10,2,2642.189904  
10,2,1508.192308  
10,2,1920.571429  
10,2,1625.454545  
10,2,1735.628205  
10,2,1824.546875  
10,2,2586.455000  
10,2,3071.465909  
10,2,1649.113636  
10,2,1723.722973  
10,2,1618.575980  
10,2,1653.127717  
10,2,2503.670139  
10,2,3906.953947  
10,2,2251.141304  
10,2,3322.175000  
10,2,1655.500000  
10,2,2303.404412  
10,2,3145.735294  
10,2,1568.250000  
10,2,1531.153846  
10,2,2292.375000  
10,2,1857.676829  
10,2,1618.290000  
10,2,3914.258929  
10,2,1918.330000

10,2,2733.170213  
10,2,1949.020833  
10,2,2319.000000  
10,2,1976.589286  
10,2,5585.892857  
10,2,3381.120000  
10,2,1880.578125  
10,2,1879.500000  
10,2,2394.710000  
10,2,1604.420732  
10,2,1657.859375  
10,2,2301.000000  
10,2,1617.915698  
10,2,2594.380952  
10,2,2076.371622  
10,2,1993.409574  
10,2,1924.957500  
10,2,3776.042453  
10,2,1805.788462  
10,2,1646.768868  
10,2,2027.872449  
10,2,1790.332547  
10,2,2297.000000  
10,2,2354.099057  
10,2,1563.475000  
10,2,3499.193878  
10,2,2192.230000  
10,2,1609.195122  
10,2,3517.694444  
10,2,1619.048077  
10,2,3073.500000  
10,2,3588.619565  
10,2,1757.385417  
10,2,1834.267857  
10,2,2478.253289  
10,2,2042.077273  
10,2,2074.902174  
10,2,4858.170000  
10,2,3050.426136  
10,2,2389.382500  
10,2,3479.466837  
10,2,10330.086957  
10,2,1737.411765  
10,2,1715.195652  
10,2,4262.470238  
10,2,1812.671053  
10,2,2166.630319  
10,2,2221.550000  
10,2,1743.409091  
10,2,1633.566667  
10,2,2032.200000  
10,2,1616.551020  
10,2,1629.333333  
10,2,2683.408854  
10,2,1944.237745  
10,2,2534.520000  
10,2,1564.250000  
10,2,1604.900000  
10,2,3356.559659  
10,2,2210.375000  
10,2,2073.980769  
10,2,1550.526316  
10,2,1513.602273  
10,2,2310.468750  
10,2,1681.919118  
10,2,2038.770833

10,2,3550.011029  
10,2,1829.602041  
10,2,1664.975000  
10,2,1924.889535  
10,2,1743.052326  
10,2,1746.032609  
10,2,2315.032051  
10,2,2143.755814  
10,2,1742.180000  
10,2,7681.030488  
10,2,1841.954545  
10,2,1727.127907  
10,2,2183.890000  
10,2,2234.413462  
10,2,2019.272727  
10,2,3229.350000  
10,2,1607.650000  
10,2,2296.456522  
10,2,2822.861111  
10,2,1685.796875  
10,2,3312.272277  
10,2,1521.469388  
10,2,2445.140351  
10,2,1774.720000  
10,2,13315.772021  
10,2,1808.033088  
10,2,2481.928571  
10,2,3770.818182  
10,2,1610.090909  
10,2,1798.389706  
10,2,3646.980769  
10,2,1755.590909  
10,2,3185.946108  
10,2,2881.767442  
10,2,1646.783163  
10,2,2175.833333  
10,2,1567.160714  
10,2,1712.864865  
10,2,1589.964286  
10,2,1825.671196  
10,2,6512.891304  
10,2,1892.718750  
10,2,2058.529891  
10,2,1602.781250  
10,2,1499.810976  
10,2,2024.387755  
10,2,4333.642857  
10,2,1756.030488  
10,2,2027.744898  
10,2,2239.885714  
10,2,1856.937500  
10,2,1677.125000  
10,2,2381.700000  
10,2,2473.583333  
10,2,3445.896739  
10,2,1631.282051  
10,2,8003.420455  
10,2,3346.045455  
10,2,2567.526042  
10,2,2016.778846  
10,2,2011.687500  
10,2,3641.723684  
10,2,1569.261905  
10,2,2295.288462  
10,2,2721.014205  
10,2,2452.445946

10,2,4505.510714  
10,2,1781.829787  
10,2,2286.880435  
10,2,1537.458333  
10,2,2146.244444  
10,2,1565.718750  
10,2,3743.820565  
10,2,1880.875000  
10,2,2131.218750  
10,2,1553.307500  
10,2,2431.239130  
10,2,2470.462209  
10,2,1989.456250  
10,2,1856.591146  
10,2,2999.939904  
10,2,1506.968750  
10,2,2245.964286  
10,2,13136.583333  
10,2,1872.794872  
10,2,5429.466667  
10,2,10527.315789  
10,2,2649.458333  
10,2,2009.220238  
10,2,5230.512821  
10,2,2551.681818  
10,2,2066.191489  
10,2,1503.109375  
10,2,1723.224359  
10,2,1858.400641  
10,2,3560.844340  
10,2,2065.687500  
10,2,1510.500000  
10,2,14405.321429  
10,2,1718.797500  
10,2,2417.771739  
10,2,1677.036058  
10,2,2299.907609  
10,2,1566.948529  
10,2,3987.221154  
10,2,1818.321875  
10,2,2176.157500  
10,2,2723.564103  
10,2,1938.413889  
10,2,1744.006410  
10,2,1528.103125  
10,2,2227.541667  
10,2,3709.580189  
10,2,2244.808511  
10,2,5354.430233  
10,2,2458.669118  
10,2,3182.610000  
10,2,3294.140625  
10,2,2484.382353  
10,2,1891.179487  
10,2,2557.354839  
10,2,1611.247396  
10,2,1583.177778  
10,2,1579.415541  
10,2,1562.964286  
10,2,2014.409574  
10,2,1523.760204  
10,2,2637.187500  
10,2,1649.932065  
10,2,2023.173913  
10,2,2766.570312  
10,2,3946.052885

10,2,1898.104167  
10,2,1568.625000  
10,2,2105.478365  
10,2,2384.467262  
10,2,2402.677778  
10,2,1569.528302  
10,2,1547.830357  
10,2,2293.732143  
10,2,1900.406915  
10,2,1555.389535  
10,2,1509.764706  
10,2,1957.384615  
10,2,3798.510204  
10,2,3458.648936  
10,2,1592.726562  
10,2,2735.794118  
10,2,1872.429878  
10,2,2029.995000  
10,2,5006.527273  
10,2,1845.500000  
10,2,2770.029412  
10,2,1636.972727  
10,2,1676.222222  
10,2,1654.000000  
10,2,2478.240196  
10,2,2040.807692  
10,2,2268.054054  
10,2,1713.349359  
10,2,1564.181250  
10,2,1697.648256  
10,2,3004.428571  
10,2,1614.256250  
10,2,2695.000000  
10,2,1573.783537  
10,2,1611.531977  
10,2,2040.923077  
10,2,4559.211735  
10,2,1953.071429  
10,2,3316.845000  
10,2,2039.487500  
10,2,1541.812500  
10,2,1961.358796  
10,2,1799.065789  
10,2,1695.130000  
10,2,2504.951531  
10,2,2561.361702  
10,2,1724.763298  
10,2,1818.852564  
10,2,2933.175532  
10,2,1915.161932  
10,2,2223.895349  
10,2,1511.885000  
10,2,1728.487500  
10,2,3475.729167  
10,2,2171.120690  
10,2,3258.803191  
10,2,3519.451220  
10,2,3100.886628  
10,2,1969.117647  
10,2,6030.852941  
10,2,1506.091463  
10,2,1707.769231  
10,2,3037.721939  
10,2,1933.803922  
10,2,3157.363208  
10,2,17129.131579

10,2,1816.555556  
10,2,2737.026163  
10,2,1722.696429  
10,2,1862.014706  
10,2,1984.885204  
10,2,1749.320513  
10,2,2977.014535  
10,2,2104.752273  
10,2,4042.724057  
10,2,3204.108696  
10,2,2238.967391  
10,2,1981.222222  
10,2,3350.865566  
10,2,2197.500000  
10,2,2599.854167  
10,2,2449.734375  
10,2,2193.300595  
10,2,3081.341346  
10,2,1678.015625  
10,2,4142.042553  
10,2,3493.162162  
10,2,1806.685096  
10,2,1673.535714  
10,2,1890.782609  
10,2,1768.666667  
10,2,1680.648810  
10,2,1523.500000  
10,2,3320.260870  
10,2,1505.000000  
10,2,1561.625000  
10,2,1835.397436  
10,2,2032.723039  
10,2,1859.625000  
10,2,1649.062500  
10,2,1927.364865  
10,2,2000.369681  
10,2,2327.355769  
10,2,4157.600000  
10,2,6781.222222  
10,2,2170.747159  
10,2,1646.226562  
10,2,1576.309524  
10,2,3473.829787  
10,2,1704.725000  
10,2,2480.277778  
10,2,3692.494048  
10,2,1967.844444  
10,2,3173.585526  
10,2,4009.218085  
10,2,2116.966667  
10,2,1875.638889  
10,2,3305.900000  
10,2,1918.046875  
10,2,6140.948980  
10,2,2738.174479  
10,2,1720.535714  
10,2,2589.543919  
10,2,1631.453125  
10,2,2352.137500  
10,2,2992.500000  
10,2,1555.428571  
10,2,1671.727041  
10,2,3289.388298  
10,2,2894.341216  
10,2,2401.117021  
10,2,2381.173077

10,2,1608.458333  
10,2,1692.228261  
10,2,1737.857143  
10,2,3052.459459  
10,2,4553.129630  
10,2,1768.064286  
10,2,2423.392857  
10,2,2367.361413  
10,2,1571.720280  
10,2,2144.000000  
10,2,4760.680000  
10,2,2802.433333  
10,2,4716.803922  
10,2,1621.943182  
10,2,2688.345455  
10,2,1994.312500  
10,2,1790.385714  
10,2,1525.204082  
10,2,2207.353125  
10,2,2779.890625  
10,2,1523.680147  
10,2,2155.570000  
10,2,4102.188830  
10,2,1538.410714  
10,2,2157.507812  
10,2,1693.805556  
10,2,2249.655172  
10,2,2278.671512  
10,2,5540.104167  
10,2,1615.229651  
10,2,2783.580729  
10,2,3281.547297  
10,2,1846.913265  
10,2,6391.795455  
10,2,2538.570312  
10,2,2318.158537  
10,2,2853.902778  
10,2,1591.965625  
10,2,1773.523936  
10,2,1891.720588  
10,2,1928.340278  
10,2,1641.125000  
10,2,1532.250000  
10,2,2635.191038  
10,2,2995.638298  
10,2,1523.142857  
10,2,5932.892857  
10,2,1621.875000  
10,2,1692.067073  
10,2,1550.287879  
10,2,1980.053191  
10,2,3086.120000  
10,2,3798.240196  
10,2,1544.216981  
10,2,3044.513369  
10,2,1793.521739  
10,2,2063.741071  
10,2,2860.705000  
10,2,1982.697115  
10,2,1912.995192  
10,2,2402.211735  
10,2,2199.436047  
10,2,1516.815217  
10,2,2387.621951  
10,2,1624.040698  
10,2,1619.005682

10,2,6230.409091  
10,2,5331.077670  
10,2,1580.211538  
10,2,3012.137500  
10,2,1846.653125  
10,2,6147.636364  
10,2,1539.417553  
10,2,2118.571429  
10,2,2173.926471  
10,2,1932.968182  
10,2,2585.500000  
10,2,1905.200000  
10,2,1687.750000  
10,2,2026.952381  
10,2,1781.093750  
10,2,1693.867347  
10,2,1936.243902  
10,2,1899.433962  
10,2,2544.000000  
10,2,3127.451923  
10,2,2519.731771  
10,2,3096.393145  
10,2,1604.695652  
10,2,2331.699468  
10,2,3880.843750  
10,2,2000.006944  
10,2,3035.913462  
10,2,2299.138158  
10,2,1651.010417  
10,2,2327.066489  
10,2,1851.012755  
10,2,2947.920455  
10,2,1638.524390  
10,2,1577.300000  
10,2,1666.790698  
10,2,3124.663043  
10,2,2439.296512  
10,2,1884.648936  
10,2,6500.196429  
10,2,2794.203704  
10,2,3969.044643  
10,2,4360.135417  
10,2,2325.742500  
10,2,3021.000000  
10,2,1932.607759  
10,2,2745.625000  
10,2,1984.431548  
10,2,1576.568452  
10,2,1847.329787  
10,2,1615.333333  
10,2,2225.660714  
10,2,1502.562500  
10,2,1791.240854  
10,2,7442.756098  
10,2,1567.925000  
10,2,1784.000000  
10,2,1586.551630  
10,2,2048.902027  
10,2,6931.950980  
10,2,2980.558140  
10,2,1835.398026  
10,2,1700.889831  
10,2,2588.961538  
10,2,3067.164062  
10,2,3181.142857  
10,2,1646.921512

10,2,1594.571429  
10,2,3701.708333  
10,2,4504.671875  
10,2,4966.678571  
10,2,1848.045673  
10,2,2919.889535  
10,2,3168.000000  
10,2,1727.747449  
10,2,1976.276596  
10,2,2259.584135  
10,2,2698.326531  
10,2,4025.973404  
10,2,1513.062500  
10,2,2031.204545  
10,2,1762.680000  
10,2,2035.045000  
10,2,1996.601351  
10,2,1657.413690  
10,2,1953.323529  
10,2,9008.205000  
10,2,1518.572222  
10,2,1537.367347  
10,2,2290.445652  
10,2,2096.714286  
10,2,1757.534091  
10,2,1716.352941  
10,2,1935.663043  
10,2,1867.684896  
10,2,1749.031250  
10,2,1533.451087  
10,2,1637.920455  
10,2,1552.795918  
10,2,3377.875000  
10,2,1809.711364  
10,2,1704.267857  
10,2,1804.367188  
10,2,1500.297872  
10,2,1820.993421  
10,2,1884.848214  
10,2,1731.915761  
10,2,2029.166667  
10,2,1820.288462  
10,2,2511.367925  
10,2,1553.989130  
10,2,2000.398438  
10,2,1561.759615  
10,2,3374.414894  
10,2,1938.369898  
10,2,1955.340909  
10,2,2094.782051  
10,2,3001.015625  
10,2,1598.400000  
10,2,1987.554687  
10,2,1921.693750  
10,2,1671.480000  
10,2,1781.596154  
10,2,1529.104651  
10,2,9759.527174  
10,2,1619.746795  
10,2,2238.328947  
10,2,3443.531915  
10,2,1706.525000  
10,2,1572.375000  
10,2,1774.097561  
10,2,1513.096154  
10,2,1694.046875

10,2,1617.685000  
10,2,1638.572368  
10,2,1714.143750  
10,2,2489.161058  
10,2,2699.205882  
10,2,2894.000000  
10,2,1793.457547  
10,2,1674.633166  
10,2,1560.750000  
10,2,2037.889423  
10,2,2229.110000  
10,2,8678.992647  
10,2,14033.774510  
10,2,4505.321429  
10,2,1672.402778  
10,2,6850.608333  
10,2,1859.396552  
10,2,1532.613208  
10,2,2572.468085  
10,2,2541.590909  
10,2,1881.150510  
10,2,3264.163265  
10,2,1674.440789  
10,2,1785.391304  
10,2,1873.988095  
10,2,3083.593750  
10,2,1855.055556  
10,2,1932.358333  
10,2,4293.435714  
10,2,2081.902778  
10,2,1731.572917  
10,2,2043.593750  
10,2,1699.135870  
10,2,1547.437500  
10,2,2898.972222  
10,2,1549.726562  
10,2,1680.685811  
10,2,2175.567500  
10,2,1558.625000  
10,2,3323.605392  
10,2,2052.951923  
10,2,2945.018229  
10,2,1796.046875  
10,2,4025.010638  
10,2,1691.122951  
10,2,1988.500000  
10,2,2675.369048  
10,2,1516.697500  
10,2,1821.546512  
10,2,2442.125000  
10,2,13881.823529  
10,2,1931.884868  
10,2,1931.918478  
10,2,3439.680851  
10,2,1592.505952  
10,2,2051.640000  
10,2,1604.511628  
10,2,1615.156250  
10,2,2194.255319  
10,2,2203.666667  
10,2,1596.976415  
10,2,2276.188953  
10,2,1694.577778  
10,2,1561.482143  
10,2,5068.307692  
10,2,1636.068750

10,2,1799.950000  
10,2,3157.750000  
10,2,2478.481707  
10,2,1865.784574  
10,2,3247.925532  
10,2,1670.859375  
10,2,1849.700000  
10,2,1603.512500  
10,2,1532.913043  
10,2,1908.250000  
10,2,1826.858696  
10,2,2710.150000  
10,2,2316.250000  
10,2,2108.400000  
10,2,1810.090361  
10,2,1655.861702  
10,2,3734.886029  
10,2,2994.428571  
10,2,1802.950000  
10,2,12087.680556  
10,2,2130.911111  
10,2,2758.300000  
10,2,1688.554054  
10,2,1541.367647  
10,2,13400.489286  
10,2,1815.923469  
10,2,1984.239362  
10,2,2277.011364  
10,2,2443.512755  
10,2,2495.512755  
10,2,4330.305556  
10,2,1524.600962  
10,2,2304.593750  
10,2,2067.191489  
10,2,2040.875000  
10,2,1510.061224  
10,2,1545.221939  
10,2,1600.769231  
10,2,2065.240625  
10,2,1540.790816  
10,2,4744.683824  
10,2,2657.366071  
10,2,1926.011905  
10,2,2127.640000  
10,2,1954.428571  
10,2,2082.142857  
10,2,2225.494681  
10,2,2499.524390  
10,2,2369.867925  
10,2,1975.073171  
10,2,2039.470238  
10,2,2004.743590  
10,2,3871.404412  
10,2,1790.641509  
10,2,2103.098958  
10,2,1590.309091  
10,2,1777.738095  
10,2,4093.391304  
10,2,1901.475000  
10,2,3941.872340  
10,2,1886.686364  
10,2,1971.771429  
10,2,1766.348684  
10,2,3019.428571  
10,2,1973.103448  
10,2,1591.500000

10,2,1877.352041  
10,2,2617.627660  
10,2,1966.800000  
10,2,1680.164894  
10,2,1754.829787  
10,2,1643.738372  
10,2,2572.410256  
10,2,2229.850610  
10,2,1595.500000  
10,2,1535.216981  
10,2,2070.272222  
10,2,2488.738636  
10,2,2396.288265  
10,2,1512.018229  
10,2,2367.717949  
10,2,2718.631579  
10,2,3678.677778  
10,2,1523.928571  
10,2,3536.002660  
10,2,1710.000000  
10,2,1637.550000  
10,2,1550.687500  
10,2,3932.306818  
10,2,1777.062814  
10,2,3098.319079  
10,2,2833.279255  
10,2,2571.777778  
10,2,2918.239583  
10,2,1602.298295  
10,2,2053.682927  
10,2,2155.345930  
10,2,3670.218182  
10,2,2849.800000  
10,2,2253.613636  
10,2,7107.125000  
10,2,1735.307500  
10,2,1774.914474  
10,2,13374.006410  
10,2,3056.840000  
10,2,1961.912500  
10,2,2748.323529  
10,2,1542.335366  
10,2,2192.807292  
10,2,2088.290541  
10,2,1548.029661  
10,2,3765.000000  
10,2,2160.610577  
10,2,1708.848958  
10,2,1821.574468  
10,2,1752.682432  
10,2,5807.565000  
10,2,1501.336735  
10,2,4681.883929  
10,2,1749.220930  
10,2,1796.000000  
10,2,8105.121795  
10,2,2518.720859  
10,2,2307.305851  
10,2,2524.136364  
10,2,4451.956250  
10,2,2635.505435  
10,2,2919.864286  
10,2,2249.500000  
11,1,2202.781250  
11,1,7196.878676  
11,1,2022.960938

11,1,1599.125000  
11,1,6535.483871  
11,1,11298.857143  
11,1,4600.312500  
11,1,4783.545918  
11,1,3372.159091  
11,1,2012.160156  
11,1,2505.011628  
11,1,1734.375000  
11,1,2226.000000  
11,1,8717.898256  
11,1,4336.400000  
11,1,1747.050633  
11,1,2673.689394  
11,1,4084.000000  
11,1,3823.397727  
11,1,12602.977941  
11,1,11083.182927  
11,1,4319.593750  
11,1,2475.095930  
11,1,1538.365385  
11,1,4370.187500  
11,1,6852.138021  
11,1,1610.487805  
11,1,2117.826613  
11,1,2109.250000  
11,1,4807.351351  
11,1,1908.690217  
11,1,2407.607500  
11,1,3322.947368  
11,1,1585.960526  
11,1,9568.210227  
11,1,5951.657143  
11,1,2781.156250  
11,1,15512.452381  
11,1,6575.125000  
11,1,2851.809524  
11,1,2273.159574  
11,1,2074.628125  
11,1,10041.914062  
11,1,3543.301471  
11,1,3134.575758  
11,1,3124.000000  
11,1,2004.277778  
11,1,4371.928571  
11,1,1740.890244  
11,1,1947.456522  
11,1,2675.785156  
11,1,6159.796053  
11,1,2730.126289  
11,1,17646.895000  
11,1,5639.647059  
11,1,1728.400000  
11,1,2276.193548  
11,1,3561.392857  
11,1,2888.694444  
11,1,3753.925000  
11,1,3724.360465  
11,1,3433.898026  
11,1,7007.281250  
11,1,3056.429878  
11,1,3525.175000  
11,1,1618.941176  
11,1,11312.913462  
11,1,4455.803977  
11,1,5848.250000

11,1,2145.587209  
11,1,2448.705357  
11,1,17776.843750  
11,1,1900.168449  
11,1,6854.170732  
11,1,1667.487500  
11,1,2013.642241  
11,1,9853.037234  
11,1,6237.043478  
11,1,5166.036585  
11,1,3235.948529  
11,1,7215.282500  
11,1,7707.215116  
11,1,1648.578125  
11,1,2371.375000  
11,1,18718.470588  
11,1,2501.775641  
11,1,2897.333333  
11,1,2068.088415  
11,1,8645.448718  
11,1,2353.756098  
11,1,9655.841727  
11,1,2183.428571  
11,1,13821.347656  
11,1,6353.557292  
11,1,3427.812500  
11,1,1976.534483  
11,1,2574.029412  
11,1,2576.366935  
11,1,2199.382979  
11,1,3009.145161  
11,1,2509.500000  
11,1,1808.452381  
11,1,1547.727778  
11,1,2247.625000  
11,1,2995.075581  
11,1,5417.340426  
11,1,1855.560811  
11,1,1705.454545  
11,1,6601.005952  
11,1,5431.216216  
11,1,2157.378049  
11,1,2745.250000  
11,1,3534.322581  
11,1,2616.306122  
11,1,2339.852679  
11,1,15310.522727  
11,1,7874.186170  
11,1,9621.423077  
11,1,3782.318182  
11,1,11723.958333  
11,1,1993.750000  
11,1,4273.857143  
11,1,15787.942708  
11,1,5278.213710  
11,1,10269.157895  
11,1,4605.500000  
11,1,12029.834375  
11,1,8002.615196  
11,1,3278.600000  
11,1,2532.875000  
11,1,2445.519886  
11,1,1889.285714  
11,1,4381.010417  
11,1,2272.214674  
11,1,3912.012195

11,1,12067.287946  
11,1,5151.616279  
11,1,2597.314103  
11,1,2028.666667  
11,1,1940.625000  
11,1,1874.647727  
11,1,4213.267857  
11,1,1905.821429  
11,1,2046.833333  
11,1,2068.250000  
11,1,19275.508065  
11,1,2638.491848  
11,1,2780.205357  
11,1,14454.819444  
11,1,3715.780488  
11,1,3917.608333  
11,1,19808.230000  
11,1,1939.007143  
11,1,2789.145833  
11,1,2573.864865  
11,1,7931.235795  
11,1,1570.852941  
11,1,11152.705357  
11,1,2009.871711  
11,1,11344.800000  
11,1,3692.161290  
11,1,8514.180000  
11,1,1524.375000  
11,1,5872.375000  
11,1,3296.697368  
11,1,3354.076087  
11,1,6942.507812  
11,1,3150.821429  
11,1,1975.833333  
11,1,6442.000000  
11,1,2524.131250  
11,1,2021.306548  
11,1,3388.281915  
11,1,2424.012500  
11,1,17287.243590  
11,1,4144.705882  
11,1,5786.906250  
11,1,2435.028846  
11,1,2972.660714  
11,1,3005.334302  
11,1,2258.246711  
11,1,1937.481618  
11,1,1600.090116  
11,1,1749.093750  
11,1,3062.853659  
11,1,2337.218750  
11,1,2220.125000  
11,1,2572.285714  
11,1,4605.886364  
11,1,2298.585526  
11,1,7113.484375  
11,1,7811.250000  
11,1,2114.057692  
11,1,2488.705357  
11,1,2140.031250  
11,1,4314.690789  
11,1,2452.558824  
11,1,14680.578571  
11,1,1642.842105  
11,1,1808.155172  
11,1,12213.714286

11,1,4041.768750  
11,1,3476.812500  
11,1,7819.354167  
11,1,5934.109756  
11,1,1933.700000  
11,1,5628.156250  
11,1,14260.892361  
11,1,1900.713710  
11,1,5851.106707  
11,1,2148.363971  
11,1,9400.690972  
11,1,2442.946875  
11,1,1843.908333  
11,1,14481.234375  
11,1,1567.191176  
11,1,2118.967105  
11,1,6067.586207  
11,1,5182.426829  
11,1,11737.301471  
11,1,7731.535714  
11,1,2211.230769  
11,1,5840.558824  
11,1,4307.444444  
11,1,5343.040625  
11,1,2420.554878  
11,1,5917.340426  
11,1,2064.625000  
11,1,6883.105556  
11,1,1674.231707  
11,1,12323.293605  
11,1,3506.409091  
11,1,10891.648936  
11,1,2339.300000  
11,1,1594.796875  
11,1,3580.908088  
11,1,4744.555556  
11,1,8981.075581  
11,1,2270.300000  
11,1,2495.690341  
11,1,8489.134615  
11,1,1530.160714  
11,1,2636.593750  
11,1,19899.180851  
11,1,8262.625000  
11,1,2622.600000  
11,1,2035.800000  
11,1,1544.687500  
11,1,3447.195312  
11,1,2307.290323  
11,1,2878.847222  
11,1,7985.208333  
11,1,13714.423913  
11,1,1686.428571  
11,1,1540.974359  
11,1,18534.288462  
11,1,3329.296512  
11,1,3175.524457  
11,1,9421.125000  
11,1,2952.375000  
11,1,9612.281250  
11,1,9656.916667  
11,1,1720.532895  
11,1,3460.734848  
11,1,16345.755435  
11,1,3746.138158  
11,1,2629.056548

11,1,1506.723684  
11,1,8961.581395  
11,1,5044.658537  
11,1,10993.250000  
11,1,1530.738636  
11,1,2324.187500  
11,1,5409.830357  
11,1,3771.433333  
11,1,2135.085366  
11,1,12978.725962  
11,1,1534.258929  
11,1,3802.329268  
11,1,11079.495968  
11,1,1606.441860  
11,1,1976.412234  
11,1,1718.976744  
11,1,1601.531250  
11,1,3827.387500  
11,1,1542.071429  
11,1,9686.180921  
11,1,9940.664634  
11,1,2541.327703  
11,1,10074.825000  
11,1,10657.333333  
11,1,3296.767045  
11,1,6706.937500  
11,1,2226.484848  
11,1,1588.828947  
11,1,2597.884615  
11,1,2515.982558  
11,1,6754.272727  
11,1,2520.709677  
11,1,2072.000000  
11,1,1814.750000  
11,1,4065.675532  
11,1,1519.949219  
11,1,7669.371795  
11,1,3082.837209  
11,1,7909.439189  
11,1,1994.694444  
11,1,2486.197674  
11,1,18928.666667  
11,1,1943.737805  
11,1,14711.500000  
11,1,11342.048387  
11,1,3957.147059  
11,1,6164.860465  
11,1,1723.878049  
11,1,1639.358108  
11,1,1555.666667  
11,1,2031.815789  
11,1,11119.567568  
11,1,4173.497449  
11,1,14011.011111  
11,1,1973.732143  
11,1,3809.562500  
11,1,4035.255000  
11,1,3442.886905  
11,1,2783.006757  
11,1,1570.740385  
11,1,5648.202703  
11,1,6316.315625  
11,1,1555.516129  
11,1,12676.758929  
11,1,2008.712766  
11,1,10073.168103

11,1,3537.500000  
11,1,1627.198529  
11,1,12027.117021  
11,1,1837.928571  
11,1,2888.596774  
11,1,1622.172619  
11,1,4536.000000  
11,1,2863.172297  
11,1,5716.696429  
11,1,3735.798077  
11,1,4128.452381  
11,1,2785.217105  
11,1,7257.163462  
11,1,19183.535714  
11,1,3496.392857  
11,1,1737.551282  
11,1,7210.178571  
11,1,3746.371212  
11,1,8853.105263  
11,1,12457.386364  
11,1,3927.291667  
11,1,2365.691860  
11,1,1677.425197  
11,1,2542.875000  
11,1,1967.920213  
11,1,2328.505682  
11,1,18325.855263  
11,1,6513.461538  
11,1,1630.092857  
11,1,4061.392857  
11,1,5411.500000  
11,1,1949.812500  
11,1,3555.208333  
11,1,6507.191489  
11,1,2585.142857  
11,1,1837.781250  
11,1,2501.562500  
11,1,2848.212500  
11,1,12927.962500  
11,1,6228.097561  
11,1,9310.937500  
11,1,1830.421053  
11,1,2264.832317  
11,1,13436.178571  
11,1,1506.277778  
11,1,7523.816667  
11,1,5240.074468  
11,1,3183.142045  
11,1,2581.850000  
11,1,2449.323529  
11,1,8217.209677  
11,1,7502.000000  
11,1,5613.979730  
11,1,2722.468750  
11,1,15233.607143  
11,1,2448.625000  
11,1,3850.259615  
11,1,8450.859375  
11,1,1817.857143  
11,1,3200.230978  
11,1,2650.900000  
11,1,8098.127604  
11,1,6478.158088  
11,1,6634.593750  
11,1,11020.163690  
11,1,1673.500000

11,1,4858.608108  
11,1,2406.426471  
11,1,17941.750000  
11,1,4073.537500  
11,1,5128.747024  
11,1,5254.600000  
11,1,6714.267857  
11,1,2527.701220  
11,1,4607.842105  
11,1,1576.255952  
11,1,7190.336538  
11,1,3427.536184  
11,1,1705.929688  
11,1,1723.858108  
11,1,6661.589744  
11,1,7817.555556  
11,1,6825.006098  
11,1,4209.336538  
11,1,1758.644444  
11,1,2535.282609  
11,1,2975.470395  
11,1,5675.709184  
11,1,3488.664894  
11,1,1738.231250  
11,1,2360.000000  
11,1,1673.289773  
11,1,2894.164062  
11,1,7361.184211  
11,1,1501.946429  
11,1,18770.978571  
11,1,1758.976744  
11,1,2035.666667  
11,1,4324.040816  
11,1,18981.800000  
11,1,5594.520270  
11,1,7085.769231  
11,1,9972.611111  
11,1,5734.500000  
11,1,3252.426829  
11,1,6622.055556  
11,1,3284.512500  
11,1,19169.796053  
11,1,2024.309896  
11,1,1992.726190  
11,1,14873.210938  
11,1,4782.198529  
11,1,7738.699074  
11,1,1584.378378  
11,1,2908.817935  
11,1,2181.116848  
11,1,2245.671875  
11,1,2237.855769  
11,1,3082.125000  
11,1,2015.890000  
11,1,2393.094697  
11,1,1925.298780  
11,1,2677.594595  
11,1,1690.198529  
11,1,8768.927632  
11,1,8375.798780  
11,1,1533.732558  
11,1,7540.666667  
11,1,2936.704545  
11,1,19821.677885  
11,1,2267.000000  
11,1,8429.523026

11,1,8590.238372  
11,1,6648.894737  
11,1,5479.648649  
11,1,13613.927419  
11,1,3633.160714  
11,1,10225.625000  
11,1,4617.369186  
11,1,5244.500000  
11,1,2366.268293  
11,1,3039.906915  
11,1,3051.362805  
11,1,2415.718750  
11,1,2979.683824  
11,1,3664.285714  
11,1,14420.954545  
11,1,2356.493750  
11,1,1781.131579  
11,1,6840.199219  
11,1,13755.200000  
11,1,2430.796875  
11,1,3748.062500  
11,1,3215.722222  
11,1,5917.722973  
11,1,7386.375000  
11,1,9820.854167  
11,1,6948.518519  
11,1,2948.583333  
11,1,3377.120000  
11,1,5253.487805  
11,1,4528.818182  
11,1,9295.554878  
11,1,1918.348837  
11,1,1807.038043  
11,1,14749.226852  
11,1,5580.726562  
11,1,3426.967391  
11,1,6695.761364  
11,1,3361.061224  
11,1,1717.362500  
11,1,4946.208333  
11,1,3019.939904  
11,1,15866.934783  
11,1,11205.872222  
11,1,2731.643293  
11,1,1802.215909  
11,1,1546.181818  
11,1,1593.779605  
11,1,1499.111413  
11,1,5945.932692  
11,1,4909.571023  
11,1,4689.431818  
11,1,5703.406250  
11,1,3250.030488  
11,1,2770.489796  
11,1,12022.529412  
11,1,2307.855263  
11,1,5060.851064  
11,1,2437.298913  
11,1,1540.666667  
11,1,4405.875000  
11,1,1511.738889  
11,1,3159.485714  
11,1,1843.065789  
11,1,1905.129032  
11,1,13105.715909  
11,1,7426.941176

11,1,2491.902344  
11,1,12456.886364  
11,1,4512.062500  
11,1,9403.757812  
11,1,4526.404412  
11,1,5143.500000  
11,1,3433.833333  
11,1,4937.191489  
11,1,2137.593750  
11,1,1846.976974  
11,1,1858.170000  
11,1,1898.052632  
11,1,4775.750000  
11,1,1887.540541  
11,1,1621.669444  
11,1,1856.595238  
11,1,3524.801282  
11,1,1615.157895  
11,1,6816.675595  
11,1,1990.733871  
11,1,14688.669355  
11,1,1613.487805  
11,1,2990.937500  
11,1,3749.739130  
11,1,6793.477564  
11,1,6786.214286  
11,1,2736.382979  
11,1,2099.619792  
11,1,9425.846154  
11,1,13788.536184  
11,1,2063.894737  
11,1,2766.880682  
11,1,1664.700000  
11,1,5385.429167  
11,1,3947.220395  
11,1,1706.878378  
11,1,1960.730769  
11,1,7953.909091  
11,1,1835.841463  
11,1,7506.676471  
11,1,2716.500000  
11,1,1640.829545  
11,1,4510.340000  
11,1,1826.940972  
11,1,11131.130435  
11,1,1958.450000  
11,1,2500.375000  
11,1,3600.027778  
11,1,4001.984375  
11,1,4150.047619  
11,1,10826.553125  
11,1,12405.419355  
11,1,1551.052326  
11,1,1965.069853  
11,1,3563.478261  
11,1,2834.281250  
11,1,1547.149038  
11,1,2542.606618  
11,1,4250.689189  
11,1,3975.333333  
11,1,4583.337766  
11,1,2735.902439  
11,1,16001.500000  
11,1,2734.510000  
11,1,4013.072917  
11,1,11767.098684

11,1,2719.183673  
11,1,2665.493056  
11,1,2551.763889  
11,1,2366.222222  
11,1,1666.410714  
11,1,6565.103659  
11,1,2691.459302  
11,1,2972.680147  
11,1,3346.483333  
11,1,2498.250000  
11,1,2570.533742  
11,1,3729.023438  
11,1,6399.875000  
11,1,3106.250000  
11,1,5583.555000  
11,1,5145.114865  
11,1,6696.457447  
11,1,11560.079861  
11,1,7095.845238  
11,1,1562.835227  
11,1,1609.790698  
11,1,2828.993750  
11,1,5013.222222  
11,1,2482.150000  
11,1,4050.736702  
11,1,4365.828125  
11,1,6500.094595  
11,1,9382.869318  
11,1,2494.785714  
11,1,5604.187500  
11,1,6122.669643  
11,1,5941.986486  
11,1,1630.954545  
11,1,9398.333333  
11,1,5431.201220  
11,1,3589.806452  
11,1,1552.465116  
11,1,8893.750000  
11,1,3994.074324  
11,1,2282.812500  
11,1,3311.619048  
11,1,3988.821429  
11,1,3191.250000  
11,1,1598.294118  
11,1,3206.554054  
11,1,3873.833333  
11,1,2007.652174  
11,1,3281.094697  
11,1,2183.294643  
11,1,5558.871875  
11,1,3543.146341  
11,1,9675.019531  
11,1,1749.085366  
11,1,12828.087121  
11,1,2651.665323  
11,1,3582.705882  
11,1,4265.843750  
11,1,1626.562500  
11,1,1739.885417  
11,1,13517.000000  
11,1,7343.794643  
11,1,4424.864130  
11,1,3234.685714  
11,1,3342.793103  
11,1,2246.324405  
11,1,6428.197674

11,1,7371.625000  
11,1,7002.525000  
11,1,1771.018939  
11,1,2154.702703  
11,1,2331.621622  
11,1,2870.676829  
11,1,9450.923077  
11,1,1941.166667  
11,1,5659.817857  
11,1,8735.000000  
11,1,4290.784091  
11,1,2300.000000  
11,1,4641.937500  
11,1,11675.250000  
11,1,10329.644231  
11,1,7584.800000  
11,1,3394.399390  
11,1,8357.700000  
11,1,4981.141892  
11,1,1881.188953  
11,1,2198.970109  
11,1,5454.058824  
11,1,6566.454545  
11,1,2465.127551  
11,1,5436.552326  
11,1,3484.000000  
11,1,7774.506410  
11,1,4362.270270  
11,1,1540.991935  
11,1,6861.060714  
11,1,3814.952778  
11,1,16064.000000  
11,1,4947.800000  
11,1,3087.510000  
11,1,1831.325000  
11,1,8575.550000  
11,1,2126.604167  
11,1,4398.800000  
11,1,1642.600000  
11,1,3535.783088  
11,1,8731.461538  
11,1,7155.197674  
11,1,2483.103125  
11,1,16378.901786  
11,1,2586.076923  
11,1,6061.786585  
11,1,10167.073171  
11,1,1701.127778  
11,1,6824.483871  
11,1,15415.347222  
11,1,1598.699219  
11,1,1541.681250  
11,1,3600.889535  
11,1,6217.906250  
11,1,1510.303191  
11,1,6105.134375  
11,1,3469.304054  
11,1,1790.556818  
11,1,4716.487245  
11,1,1914.826087  
11,1,13736.562500  
11,1,2874.875000  
11,1,13962.810811  
11,1,5726.877976  
11,1,1876.536585  
11,1,2394.162791

11,1,4479.054348  
11,1,2687.404762  
11,1,7936.187500  
11,1,2742.427632  
11,1,1961.092262  
11,1,13633.013514  
11,1,3826.188830  
11,1,3944.568750  
11,1,8989.525641  
11,1,3285.584677  
11,1,3674.642857  
11,1,3896.592391  
11,1,2333.476562  
11,1,5448.608696  
11,1,2781.200000  
11,1,1806.156250  
11,1,15470.101064  
11,1,2428.505435  
11,1,2324.078571  
11,1,10652.605263  
11,1,4330.862745  
11,1,5201.525641  
11,1,2154.640625  
11,1,13978.346154  
11,1,8840.333333  
11,1,3326.812500  
11,1,7944.798077  
11,1,7610.073864  
11,1,2252.560976  
11,1,6329.906977  
11,1,3470.875000  
11,1,3998.808673  
11,1,17481.851064  
11,1,5749.202381  
11,1,2155.650000  
11,1,2145.765957  
11,1,2138.666667  
11,1,3439.769231  
11,1,5740.973684  
11,1,17314.045455  
11,1,3773.131944  
11,1,2725.560976  
11,1,1568.142857  
11,1,3763.076087  
11,1,2971.926829  
11,1,1792.062500  
11,1,3569.877907  
11,1,1759.618590  
11,1,1903.357143  
11,1,2611.300000  
11,1,2433.953125  
11,1,10105.341912  
11,1,2838.560714  
11,1,2197.204787  
11,1,3579.409722  
11,1,4519.315000  
11,1,1577.416667  
11,1,2648.926136  
11,1,2685.608333  
11,1,4923.281250  
11,1,1831.618243  
11,1,1745.900568  
11,1,2082.240625  
11,1,9620.287500  
11,1,11780.597826  
11,1,1853.363636

11,1,10468.320755  
11,1,3371.005952  
11,1,2488.665441  
11,1,4301.450000  
11,1,7001.225000  
11,1,3610.798780  
11,1,2758.761905  
11,1,5487.500000  
11,1,9221.097561  
11,1,3787.794872  
11,1,4690.458333  
11,1,14603.573529  
11,1,4735.916667  
11,1,2323.006757  
11,1,2137.485294  
11,1,4775.544643  
11,1,3604.520833  
11,1,3828.517857  
11,1,1764.051282  
11,1,2184.451531  
11,1,2096.043605  
11,1,5763.722222  
11,1,2867.171053  
11,1,3442.679688  
11,1,3624.780000  
11,1,6776.877778  
11,1,6898.980000  
11,1,2368.496429  
11,1,3972.636364  
11,1,1659.031250  
11,1,1811.542553  
11,1,2620.942308  
11,1,2584.981618  
11,1,7990.707386  
11,1,2696.394531  
11,1,1610.000000  
11,1,2250.329787  
11,1,3082.415441  
11,1,2272.571429  
11,1,11304.113281  
11,1,3046.960938  
11,1,1628.571429  
11,1,4649.461538  
11,1,14704.339744  
11,1,2422.444444  
11,1,9888.125000  
11,1,2049.316176  
11,1,16269.640957  
11,1,1512.454545  
11,1,1616.646341  
11,1,2906.250000  
11,1,1642.940000  
11,1,8349.371429  
11,1,1816.503125  
11,1,4436.488971  
11,1,3722.096154  
11,1,2137.292683  
11,1,15441.229839  
11,1,2475.411765  
11,1,2399.023256  
11,1,13805.413194  
11,1,2318.607143  
11,1,16786.108108  
11,1,2074.963415  
11,1,2358.875000  
11,1,3823.320122

11,1,6082.517500  
11,1,1788.739130  
11,1,2681.709677  
11,1,17450.072917  
11,1,4975.115385  
11,1,3664.075000  
11,1,1506.459677  
11,1,12440.152174  
11,1,2993.769231  
11,1,5120.241935  
11,1,4292.087963  
11,1,2792.764706  
11,1,4382.870968  
11,1,3765.489362  
11,1,1720.732143  
11,1,3070.586735  
11,1,2646.214286  
11,1,2528.408537  
11,1,1877.487500  
11,1,2803.500000  
11,1,3225.576531  
11,1,2226.950000  
11,1,3033.162162  
11,1,1798.635135  
11,1,9119.583333  
11,1,2010.355000  
11,1,8494.419355  
11,1,1749.343750  
11,1,3344.787500  
11,1,2879.250000  
11,1,2771.391304  
11,1,6589.795455  
11,1,6443.524194  
11,1,9175.388298  
11,1,5668.648585  
11,1,4158.045732  
11,1,19354.230769  
11,1,2031.949219  
11,1,2142.426471  
11,1,1846.612903  
11,1,3993.800000  
11,1,4611.044643  
11,1,2644.617647  
11,1,5071.116667  
11,1,2783.021429  
11,1,3345.660000  
11,1,2627.194149  
11,1,3426.390244  
11,1,5028.179487  
11,1,1768.929348  
11,1,4466.385417  
11,1,18645.095395  
11,1,7941.706731  
11,1,4034.541667  
11,1,2389.303922  
11,1,3802.409884  
11,1,1748.687500  
11,1,5173.687500  
11,1,2837.083333  
11,1,2106.469512  
11,1,7441.224490  
11,1,2036.832237  
11,1,15605.525000  
11,1,11838.014706  
11,1,4258.808140  
11,1,2166.961538

11,1,3101.261029  
11,1,2019.792614  
11,1,6981.004808  
11,1,1630.199324  
11,1,16308.196875  
11,1,2128.226974  
11,1,2743.736842  
11,1,3096.130319  
11,1,14524.953125  
11,1,7364.128788  
11,1,3876.723684  
11,1,9115.648438  
11,1,1914.766892  
11,1,3534.500000  
11,1,5814.750000  
11,1,7064.831250  
11,1,1609.480263  
11,1,15819.578947  
11,1,12400.052632  
11,1,4555.654255  
11,1,1910.179878  
11,1,2176.118421  
11,1,2069.580357  
11,1,5453.485294  
11,1,3382.833333  
11,1,1927.235577  
11,1,5625.816406  
11,1,1889.546875  
11,1,5522.389205  
11,1,1791.621795  
11,1,2742.132353  
11,1,3172.604651  
11,1,1964.815476  
11,1,13783.580729  
11,1,6193.352273  
11,1,7747.500000  
11,1,8308.187500  
11,1,13067.460000  
11,1,5331.637500  
11,1,1660.156250  
11,1,13047.250000  
11,1,13620.145833  
11,1,8318.676724  
11,1,1626.762500  
11,1,1962.340909  
11,1,10149.168367  
11,1,12631.015244  
11,1,1666.321809  
11,1,1947.108974  
11,1,6520.601190  
11,1,13051.500000  
11,1,11328.500000  
11,1,2575.363095  
11,1,4655.587209  
11,1,6797.436224  
11,1,3657.155000  
11,1,1543.632979  
11,1,2126.973404  
11,1,6544.728125  
11,1,6612.271277  
11,1,2305.263889  
11,1,1567.250000  
11,1,2306.867647  
11,1,1762.166667  
11,1,3083.679487  
11,1,3966.613281

11,1,1762.206395  
11,1,19291.000000  
11,1,8245.510204  
11,1,3032.044643  
11,1,3791.002551  
11,1,1695.842857  
11,1,2352.506757  
11,1,5270.704545  
11,1,12437.019608  
11,1,12938.335227  
11,1,1623.880102  
11,1,1840.280488  
11,1,6290.695652  
11,1,2320.073864  
11,1,1538.896104  
11,1,1559.772727  
11,1,1551.848837  
11,1,1659.642857  
11,1,17466.353659  
11,1,3175.885135  
11,1,3078.375000  
11,1,4383.275735  
11,1,1960.605263  
11,1,6066.100000  
11,1,2297.554348  
11,1,2324.090000  
11,1,3308.068182  
11,1,2081.607143  
11,1,7774.387821  
11,1,1686.602041  
11,1,3276.569767  
11,1,7917.454545  
11,1,7258.354167  
11,1,5970.864583  
11,1,2042.246212  
11,1,1895.150000  
11,1,13533.930851  
11,1,2460.109375  
11,1,1916.148810  
11,1,17819.875000  
11,1,5913.201923  
11,1,3665.750000  
11,1,4170.953488  
11,1,2357.133721  
11,1,1871.677632  
11,1,2048.000000  
11,1,6091.881250  
11,1,1541.483696  
11,1,2298.344595  
11,1,1509.019737  
11,1,8512.532609  
11,1,2860.446429  
11,1,1569.405405  
11,1,3264.837209  
11,1,2442.916667  
11,1,2092.789062  
11,1,2503.135714  
11,1,4091.463415  
11,1,2488.083333  
11,1,1727.467626  
11,1,5573.538462  
11,1,1591.136364  
11,1,2257.576389  
11,1,2344.058333  
11,1,1698.442308  
11,1,8327.279412

11,1,7929.257576  
11,1,6666.740132  
11,1,1522.222222  
11,1,4357.750000  
11,1,2250.719512  
11,1,4011.631579  
11,1,5420.771341  
11,1,11869.000000  
11,1,14947.264535  
11,1,5778.600000  
11,1,13296.452206  
11,1,2016.041667  
11,1,1577.583333  
11,1,9481.329268  
11,1,1552.021277  
11,1,2961.900000  
11,1,1707.000000  
11,1,1677.651316  
11,1,3445.450000  
11,1,3343.660256  
11,1,5479.454268  
11,1,3055.437500  
11,1,18210.666667  
11,1,2917.308824  
11,1,1500.319712  
11,1,9663.451220  
11,1,1613.062500  
11,1,3206.244444  
11,1,2335.133929  
11,1,6805.765957  
11,1,1506.541667  
11,1,19394.341463  
11,1,2569.841216  
11,1,2490.275862  
11,1,4414.184211  
11,1,1997.800000  
11,1,1986.831081  
11,1,7107.437500  
11,1,4255.553571  
11,1,10681.231618  
11,1,19775.941176  
11,1,3549.050000  
11,1,3741.943548  
11,1,2244.381098  
11,1,18463.015625  
11,1,2778.474490  
11,1,3875.150000  
11,1,2948.188953  
11,1,3324.714286  
11,1,1622.009146  
11,1,2899.733333  
11,1,3229.475000  
11,1,2169.299342  
11,1,12903.985294  
11,1,3387.131579  
11,1,3854.343750  
11,1,1671.674479  
11,1,3617.230769  
11,1,14638.447368  
11,1,1844.515625  
11,1,11245.181034  
11,1,9005.318182  
11,1,2356.362500  
11,1,13483.375000  
11,1,8857.391304  
11,1,3462.255814

11,1,1702.812500  
11,1,18826.070122  
11,1,2462.875000  
11,1,2697.455645  
11,1,1589.189189  
11,1,3107.125000  
11,1,1549.303571  
11,1,2589.200000  
11,1,7624.588816  
11,1,1579.979167  
11,1,10960.500000  
11,1,8023.775000  
11,1,12608.111702  
11,1,8274.274194  
11,1,3810.209302  
11,1,1934.895833  
11,1,5921.315341  
11,1,3071.897059  
11,1,4079.031250  
11,1,19774.062500  
11,1,17446.573171  
11,1,4444.288462  
11,1,2005.073370  
11,1,4259.984375  
11,1,1670.483871  
11,1,19137.241667  
11,1,2658.789474  
11,1,4602.500000  
11,1,1627.380556  
11,1,8347.500000  
11,1,2184.830000  
11,1,3078.950000  
11,1,1677.916667  
11,1,2044.312500  
11,1,2034.536585  
11,1,4385.941176  
11,1,2136.869318  
11,1,7665.996711  
11,1,2288.115385  
11,1,2972.770349  
11,1,8182.277778  
11,1,12771.244792  
11,1,1721.849138  
11,1,2783.262500  
11,1,4957.476562  
11,1,2588.911184  
11,1,6491.567568  
11,1,4603.011364  
11,1,9605.142857  
11,1,1790.007353  
11,1,2469.041667  
11,1,4991.388514  
11,1,5066.250000  
11,1,1523.000000  
11,1,18679.621875  
11,1,4297.679348  
11,1,1902.543103  
11,1,5199.446429  
11,1,4180.138158  
11,1,2235.944444  
11,1,3042.805556  
11,1,1542.000000  
11,1,4846.150000  
11,1,2254.455882  
11,1,11356.196809  
11,1,13916.993750

11,1,7516.173387  
11,1,11499.971429  
11,1,1848.443182  
11,1,1884.881250  
11,1,4329.515625  
11,1,2298.750000  
11,1,5860.681818  
11,1,1825.659091  
11,1,3125.122340  
11,1,2214.731250  
11,1,11007.062500  
11,1,2277.116279  
11,1,4291.546875  
11,1,2989.673387  
11,1,2597.460366  
11,1,1932.970238  
11,1,1982.871622  
11,1,5510.772436  
11,1,5842.594512  
11,1,4462.256098  
11,1,17794.500000  
11,1,10197.735294  
11,1,2360.547414  
11,1,2346.125000  
11,1,3263.897959  
11,1,7480.252660  
11,1,3523.946809  
11,1,1525.941176  
11,1,1795.548387  
11,1,3153.738889  
11,1,5316.150000  
11,1,2137.987179  
11,1,10000.463889  
11,1,2866.891304  
11,1,3032.306818  
11,1,3840.805147  
11,1,4954.225000  
11,1,5692.093023  
11,1,1838.750000  
11,1,3840.639706  
11,1,2539.400000  
11,1,15474.741667  
11,1,9215.777174  
11,1,10620.706250  
11,1,2928.738281  
11,1,3600.294118  
11,1,5022.718750  
11,1,1798.561224  
11,1,6969.428571  
11,1,2833.022321  
11,1,1542.262195  
11,1,8909.332143  
11,1,3058.593750  
11,1,2924.755814  
11,1,2518.689815  
11,1,3150.600000  
11,1,6903.179688  
11,1,2125.982143  
11,1,1540.020833  
11,1,3121.461538  
11,1,5374.568182  
11,1,1714.898810  
11,1,14650.250000  
11,1,7751.217391  
11,1,1993.835106  
11,1,1918.921053

11,1,16606.785000  
11,1,12254.604167  
11,1,6161.575581  
11,1,1671.083333  
11,1,14312.589147  
11,1,1984.121094  
11,1,2804.187500  
11,1,4363.946429  
11,1,2658.842105  
11,1,6950.114583  
11,1,2324.983871  
11,1,16348.627907  
11,1,1668.875000  
11,1,8961.728125  
11,1,3317.428571  
11,1,3004.877660  
11,1,1994.823529  
11,1,13918.361111  
11,1,1719.500000  
11,1,10487.394444  
11,1,2840.456081  
11,1,3627.753205  
11,1,1614.668367  
11,1,8698.944444  
11,1,2674.252976  
11,1,8409.760204  
11,1,12860.156250  
11,1,5262.392857  
11,1,4285.875000  
11,1,8270.086207  
11,1,7020.692308  
11,1,4024.469697  
11,1,1690.028571  
11,1,2188.194079  
11,1,7028.497159  
11,1,14957.843750  
11,1,2705.607143  
11,1,9583.369565  
11,1,1726.655556  
11,1,1750.173077  
11,1,1709.945312  
11,1,1553.913462  
11,1,2187.941176  
11,1,5676.608696  
11,1,4092.437500  
11,1,11369.675000  
11,1,18076.375000  
11,1,1530.989796  
11,1,3744.211538  
11,1,4920.666667  
11,1,2218.900000  
11,1,1628.771429  
11,1,2557.291667  
11,1,3445.368902  
11,1,6891.556250  
11,1,2524.522059  
11,1,9004.015152  
11,1,3270.322581  
11,1,2162.187500  
11,1,3462.446429  
11,1,3053.120000  
11,1,1897.088235  
11,1,2839.898649  
11,1,8583.468750  
11,1,2270.883721  
11,1,7253.269231

11,1,4070.885870  
11,1,7223.250000  
11,1,7623.894531  
11,1,7500.010870  
11,1,2640.611702  
11,1,2414.063830  
11,1,4527.058333  
11,1,5943.531250  
11,1,5422.525862  
11,1,5772.151596  
11,1,2328.676829  
11,1,8658.190476  
11,1,5293.045455  
11,1,2020.060000  
11,1,1711.500000  
11,1,6031.426136  
11,1,2067.956250  
11,1,11304.106509  
11,1,6675.853659  
11,1,5823.488372  
11,1,3583.684375  
11,1,3177.791667  
11,1,2430.545455  
11,1,9387.194079  
11,1,5673.655172  
11,1,3983.826389  
11,1,3917.741071  
11,1,5881.175000  
11,1,3709.157895  
11,1,2610.494565  
11,1,2376.500000  
11,1,14043.935897  
11,1,3674.829268  
11,1,19345.625000  
11,1,13008.153846  
11,1,5714.146226  
11,1,14287.987805  
11,1,3186.450000  
11,1,1792.046875  
11,1,1983.125000  
11,1,4331.147059  
11,1,4621.914474  
11,1,2714.250000  
11,1,1652.687500  
11,1,2654.720588  
11,1,4039.977273  
11,1,12929.853448  
11,1,2514.983333  
11,1,2752.801829  
11,1,1841.343750  
11,1,1799.964286  
11,1,2219.944444  
11,1,12665.953125  
11,1,2109.791667  
11,1,5671.159091  
11,1,3545.756098  
11,1,3395.285000  
11,1,2229.029762  
11,1,5766.333333  
11,1,6996.750000  
11,1,2205.864865  
11,1,7370.929688  
11,1,2996.666667  
11,1,1520.713235  
11,1,3024.125000  
11,1,3381.687500

11,1,5435.891304  
11,1,2619.294872  
11,1,1650.442308  
11,1,3585.455645  
11,1,12788.633929  
11,1,1926.914062  
11,1,2803.326531  
11,1,10604.562500  
11,1,9101.260638  
11,1,9339.773438  
11,1,1686.375000  
11,1,2057.062500  
11,1,18271.250000  
11,1,8466.982143  
11,1,2911.742647  
11,1,1508.921875  
11,1,2949.524390  
11,1,4701.502273  
11,1,6740.615385  
11,1,2071.428571  
11,1,4316.823718  
11,1,3676.833333  
11,1,11573.842105  
11,1,4284.666667  
11,1,1731.548387  
11,1,3154.904070  
11,1,4832.137500  
11,1,4746.625000  
11,1,1700.653125  
11,1,3441.080882  
11,1,2728.093085  
11,1,4343.675000  
11,1,1880.500000  
11,1,1677.929348  
11,1,3286.110294  
11,1,2024.870968  
11,1,7656.219512  
11,1,3979.875000  
11,1,2609.065476  
11,1,9887.674419  
11,1,11337.525000  
11,1,13840.750000  
11,1,2875.308511  
11,1,1940.062500  
11,1,1713.730769  
11,1,2140.970588  
11,1,1862.250000  
11,1,1955.230769  
11,1,3331.320000  
11,1,1606.109756  
11,1,1986.708333  
11,1,2628.390244  
11,1,3442.177885  
11,1,3387.945946  
11,1,11572.573529  
11,1,2076.787879  
11,1,9734.429688  
11,1,4754.736111  
11,1,3921.173913  
11,1,2239.000000  
11,1,1976.666667  
11,1,11198.532609  
11,1,8069.423387  
11,1,2321.102041  
11,1,3428.333333  
11,1,13908.279762

11,1,2924.903125  
11,1,16698.368902  
11,1,1655.272727  
11,1,6356.594697  
11,1,1502.942073  
11,1,3138.162791  
11,1,2101.116848  
11,1,1849.832237  
11,1,1833.375000  
11,1,2963.169643  
11,1,1610.969512  
11,1,9243.077206  
11,1,1697.533654  
11,1,2092.136905  
11,1,1704.156250  
11,1,15457.850694  
11,1,13305.221154  
11,1,2937.732143  
11,1,4156.370833  
11,1,3350.894022  
11,1,11490.261364  
11,1,3605.597973  
11,1,4096.568182  
11,1,2908.058824  
11,1,2128.500000  
11,1,2691.270000  
11,1,18204.991667  
11,1,2431.725000  
11,1,10937.964286  
11,1,16466.513021  
11,1,2189.952703  
11,1,2668.117647  
11,1,8824.000000  
11,1,4955.000000  
11,1,6413.558824  
11,1,6735.682927  
11,1,4910.711538  
11,1,3758.991279  
11,1,1887.183333  
11,1,4282.021277  
11,1,2173.347826  
11,1,2951.297619  
11,1,2504.750000  
11,1,6052.807692  
11,1,1863.909091  
11,1,4529.233553  
11,1,6731.270833  
11,1,1521.844595  
11,1,4254.758333  
11,1,7052.000000  
11,1,17572.769231  
11,1,3638.230114  
11,1,1789.527778  
11,1,9494.736842  
11,1,3804.310000  
11,1,1766.042763  
11,1,2763.925000  
11,1,7206.091837  
11,1,4931.319444  
11,1,19251.225000  
11,1,5343.782609  
11,1,6454.071429  
11,1,5760.230769  
11,1,2260.632353  
11,1,9991.863095  
11,1,2028.666667

11,1,2986.322222  
11,1,2728.965000  
11,1,6174.379032  
11,1,2924.877551  
11,1,1617.234375  
11,1,3286.078125  
11,1,3415.078125  
11,1,8250.663793  
11,1,7835.250000  
11,1,3713.666667  
11,1,3897.475000  
11,1,7813.241935  
11,1,5315.837500  
11,1,4190.625000  
11,1,3180.836538  
11,1,1704.855263  
11,1,3914.928571  
11,1,2033.654762  
11,1,3080.125000  
11,1,3996.272727  
12,2,2648.668478  
12,2,1970.585784  
12,2,1537.531250  
12,2,1615.281250  
12,2,1588.708333  
12,2,1511.812500  
12,2,1561.553977  
12,2,2341.500000  
12,2,1606.953488  
12,2,1979.490132  
12,2,1701.412500  
12,2,3297.243243  
12,2,2423.935897  
12,2,1711.554348  
12,2,2488.739583  
12,2,1538.000000  
12,2,2021.500000  
12,2,2305.934524  
12,2,3476.968023  
12,2,3572.109756  
12,2,2994.320755  
12,2,1808.010417  
12,2,2474.672131  
12,2,1677.950000  
12,2,2096.660714  
12,2,2194.111111  
12,2,2097.545455  
12,2,5556.585366  
12,2,1968.715909  
12,2,2110.804878  
12,2,1595.201087  
12,2,1527.581633  
12,2,1754.852778  
12,2,1623.375000  
12,2,2912.358974  
12,2,1561.608696  
12,2,2658.833333  
12,2,4696.062500  
12,2,14197.415625  
12,2,1533.779412  
12,2,1713.000000  
12,2,1940.550000  
12,2,4456.371528  
12,2,1802.797872  
12,2,3749.264706  
12,2,1525.846154

12,2,1870.956522  
12,2,2667.000000  
12,2,2200.125000  
12,2,2098.480392  
12,2,2251.533654  
12,2,4521.576531  
12,2,2989.968085  
12,2,2336.625000  
12,2,1656.293478  
12,2,1901.385135  
12,2,1617.500000  
12,2,3202.468085  
12,2,1898.270408  
12,2,2171.189286  
12,2,1845.372340  
12,2,1825.728814  
12,2,1973.711864  
12,2,1707.589674  
12,2,2008.680233  
12,2,1564.975000  
12,2,1508.865854  
12,2,1897.644444  
12,2,3272.691860  
12,2,1766.900000  
12,2,1534.331633  
12,2,2034.824324  
12,2,1817.205882  
12,2,1853.065789  
12,2,1778.219388  
12,2,2611.927632  
12,2,1598.994318  
12,2,1798.785714  
12,2,2552.062500  
12,2,2359.521341  
12,2,1837.343023  
12,2,4471.837500  
12,2,2453.177632  
12,2,1627.093023  
12,2,2086.600000  
12,2,2143.666667  
12,2,2445.422222  
12,2,1512.200000  
12,2,3214.517857  
12,2,3407.923611  
12,2,1847.466667  
12,2,2058.480769  
12,2,2120.051630  
12,2,2011.226974  
12,2,1704.727273  
12,2,2046.523810  
12,2,2500.750000  
12,2,1996.368421  
12,2,1574.930556  
12,2,1631.132653  
12,2,1507.839286  
12,2,2469.017544  
12,2,1524.625000  
12,2,1538.496711  
12,2,1660.606250  
12,2,3478.445000  
12,2,4061.208333  
12,2,1722.653061  
12,2,1664.035714  
12,2,1552.500000  
12,2,1918.573171  
12,2,1513.655405

12,2,2903.978723  
12,2,1743.545455  
12,2,1786.403846  
12,2,1714.125000  
12,2,2185.655000  
12,2,6611.666667  
12,2,14117.107143  
12,2,3251.375000  
12,2,2270.555556  
12,2,2172.615132  
12,2,1526.803571  
12,2,2361.125000  
12,2,2299.543103  
12,2,2624.500000  
12,2,3242.750000  
12,2,1556.368421  
12,2,2818.576531  
12,2,2184.469880  
12,2,2060.829082  
12,2,5001.326087  
12,2,4851.993590  
12,2,2329.142857  
12,2,2551.365625  
12,2,4746.929688  
12,2,2745.695652  
12,2,1610.437500  
12,2,2794.674342  
12,2,1736.303125  
12,2,1602.433594  
12,2,1588.100610  
12,2,2068.811275  
12,2,3620.016447  
12,2,1798.446809  
12,2,2344.241935  
12,2,4229.157609  
12,2,2670.377358  
12,2,1718.440678  
12,2,1596.294118  
12,2,6526.314103  
12,2,3098.200000  
12,2,2403.550000  
12,2,1726.209302  
12,2,1526.062500  
12,2,2517.625000  
12,2,1573.880682  
12,2,3474.076705  
12,2,2100.888889  
12,2,2824.666667  
12,2,1787.634615  
12,2,1822.040698  
12,2,1589.093220  
12,2,2676.670455  
12,2,1623.973404  
12,2,4560.510204  
12,2,2146.739583  
12,2,1972.024038  
12,2,4006.195652  
12,2,1624.642157  
12,2,2753.272059  
12,2,8340.842262  
12,2,1574.253205  
12,2,1643.981707  
12,2,1992.593750  
12,2,1932.588068  
12,2,2052.500000  
12,2,4732.615385

12,2,4478.458333  
12,2,2243.831395  
12,2,3806.625000  
12,2,2031.298077  
12,2,1792.282609  
12,2,1767.393617  
12,2,17716.431818  
12,2,11081.357143  
12,2,1975.238636  
12,2,1631.083333  
12,2,2067.020833  
12,2,2110.976351  
12,2,2436.612745  
12,2,2193.235294  
12,2,6646.518519  
12,2,2434.715278  
12,2,2802.524457  
12,2,2210.554245  
12,2,1773.269737  
12,2,1778.875000  
12,2,1788.897059  
12,2,1622.026316  
12,2,2213.916667  
12,2,3727.297872  
12,2,1535.954545  
12,2,1905.485795  
12,2,1661.196721  
12,2,2157.000000  
12,2,1593.218750  
12,2,1649.545918  
12,2,2960.518750  
12,2,1934.627778  
12,2,2190.082447  
12,2,5749.355263  
12,2,2914.863636  
12,2,1966.802885  
12,2,1631.128378  
12,2,3374.062500  
12,2,2081.517045  
12,2,1809.513889  
12,2,1816.062500  
12,2,1594.914634  
12,2,1520.327128  
12,2,3841.649457  
12,2,1515.377660  
12,2,1694.787500  
12,2,2055.250000  
12,2,1501.040000  
12,2,1828.425000  
12,2,2855.801471  
12,2,3084.944712  
12,2,3199.750000  
12,2,1890.878049  
12,2,2950.194767  
12,2,1921.330645  
12,2,1946.100000  
12,2,3009.323529  
12,2,2421.526316  
12,2,1642.347826  
12,2,2781.375000  
12,2,1906.906863  
12,2,2381.908163  
12,2,2466.147959  
12,2,3839.725490  
12,2,2248.625000  
12,2,1702.755952

12,2,1788.554245  
12,2,2401.300595  
12,2,1627.657609  
12,2,4997.727941  
12,2,4292.492647  
12,2,2295.230769  
12,2,3062.204545  
12,2,3201.192308  
12,2,1971.727778  
12,2,1825.321429  
12,2,2519.600000  
12,2,1561.183333  
12,2,2920.937500  
12,2,1585.190476  
12,2,2065.810256  
12,2,1966.605263  
12,2,2831.400000  
12,2,1611.250000  
12,2,2861.234694  
12,2,1628.536458  
12,2,2318.303879  
12,2,1844.137500  
12,2,1953.308824  
12,2,3987.836538  
12,2,1831.806818  
12,2,2031.738208  
12,2,1908.613372  
12,2,3714.000000  
12,2,1634.911765  
12,2,1569.083333  
12,2,1827.981132  
12,2,1762.929167  
12,2,1687.500000  
12,2,1508.600000  
12,2,2198.539062  
12,2,2797.138587  
12,2,2062.050000  
12,2,2267.478261  
12,2,1917.318182  
12,2,1613.395833  
12,2,1741.187500  
12,2,2259.296512  
12,2,1800.750000  
12,2,1666.520408  
12,2,1842.933511  
12,2,2265.269231  
12,2,1686.895161  
12,2,2584.425532  
12,2,2865.144886  
12,2,2099.237179  
12,2,2436.203947  
12,2,2864.905000  
12,2,3709.000000  
12,2,1671.580357  
12,2,1756.620853  
12,2,1845.050000  
12,2,1941.934211  
12,2,3431.083333  
12,2,1601.860000  
12,2,1819.197674  
12,2,4493.250000  
12,2,2294.230114  
12,2,2234.339623  
12,2,2167.169118  
12,2,1641.154412  
12,2,1607.731383

12,2,2213.117647  
12,2,2133.386364  
12,2,2688.250000  
12,2,2910.296875  
12,2,3003.571429  
12,2,2052.658019  
12,2,1840.657609  
12,2,2313.372340  
12,2,1519.707317  
12,2,2979.935897  
12,2,2426.875000  
12,2,1582.792683  
12,2,1964.489583  
12,2,4323.510638  
12,2,1987.330000  
12,2,1621.582500  
12,2,1743.806818  
12,2,2618.135638  
12,2,2745.130000  
12,2,1519.972973  
12,2,1807.127907  
12,2,5693.292553  
12,2,2144.844298  
12,2,2320.520833  
12,2,2108.642857  
12,2,2634.121212  
12,2,3227.724490  
12,2,3916.382979  
12,2,2172.619048  
12,2,1771.573529  
12,2,1732.800000  
12,2,2625.232500  
12,2,1814.740000  
12,2,2354.779412  
12,2,1526.889205  
12,2,2181.000000  
12,2,1885.081522  
12,2,1562.037234  
12,2,1884.534091  
12,2,1975.635000  
12,2,4318.824324  
12,2,3464.968750  
12,2,2297.226190  
12,2,3186.625000  
12,2,2702.259615  
12,2,2215.866071  
12,2,1815.211538  
12,2,4172.011364  
12,2,1558.747222  
12,2,2935.931250  
12,2,2461.843137  
12,2,1680.880000  
12,2,2919.378378  
12,2,4319.656915  
12,2,1876.728261  
12,2,1841.340426  
12,2,2224.396341  
12,2,11373.633094  
12,2,2416.250000  
12,2,1715.718750  
12,2,2118.322115  
12,2,1693.398936  
12,2,1733.988095  
12,2,1697.040625  
12,2,2702.069444  
12,2,2073.235119

12,2,3610.295918  
12,2,1909.006410  
12,2,2295.318627  
12,2,1626.046196  
12,2,1616.088415  
12,2,3476.853659  
12,2,1616.546512  
12,2,1642.128472  
12,2,13779.392857  
12,2,2960.908784  
12,2,2693.760000  
12,2,3485.639423  
12,2,1525.052500  
12,2,1520.836735  
12,2,1559.168919  
12,2,3010.224490  
12,2,9654.881579  
12,2,1500.838942  
12,2,1546.257812  
12,2,1734.435976  
12,2,1741.130000  
12,2,2586.421875  
12,2,1662.206633  
12,2,2090.023256  
12,2,1618.975543  
12,2,1628.414634  
12,2,1745.438830  
12,2,1684.461310  
12,2,2372.955882  
12,2,1878.798077  
12,2,1786.102564  
12,2,1771.372093  
12,2,2298.990566  
12,2,2284.135417  
12,2,2026.287791  
12,2,2006.160714  
12,2,2500.813830  
12,2,2761.416667  
12,2,1551.000000  
12,2,1528.916667  
12,2,1814.861702  
12,2,1636.555556  
12,2,1893.200000  
12,2,2408.772321  
12,2,4726.414062  
12,2,2023.252660  
12,2,1690.639706  
12,2,1557.552778  
12,2,2147.875000  
12,2,1693.184524  
12,2,2255.072368  
12,2,2160.392857  
12,2,4672.383929  
12,2,2072.650000  
12,2,2683.177778  
12,2,8645.368750  
12,2,1559.000000  
12,2,1986.408019  
12,2,2302.338710  
12,2,1757.500000  
12,2,1987.320513  
12,2,3212.050000  
12,2,1560.000000  
12,2,1675.033333  
12,2,3059.096154  
12,2,3198.400000

12,2,2415.666667  
12,2,1787.878205  
12,2,1941.689815  
12,2,1679.294118  
12,2,2121.200000  
12,2,1514.002315  
12,2,3777.426829  
12,2,2732.868056  
12,2,2548.975000  
12,2,2335.046053  
12,2,4983.260638  
12,2,4445.670213  
12,2,2704.904762  
12,2,1662.817708  
12,2,3180.596154  
12,2,1906.840000  
12,2,4388.942500  
12,2,2558.485000  
12,2,4224.235000  
12,2,1643.432432  
12,2,2821.818878  
12,2,1564.333333  
12,2,1582.761905  
12,2,2193.673077  
12,2,11592.213816  
12,2,3554.703804  
12,2,2159.285326  
12,2,2772.859375  
12,2,1668.517500  
12,2,4588.666667  
12,2,2370.718750  
12,2,1563.750000  
12,2,2083.002841  
12,2,2013.000000  
12,2,1560.031250  
12,2,2067.635417  
12,2,4379.687500  
12,2,1655.743590  
12,2,1607.291667  
12,2,1500.942308  
12,2,1527.910714  
12,2,2421.125000  
12,2,1945.005556  
12,2,1525.000000  
12,2,1923.380952  
12,2,1660.255814  
12,2,1609.662791  
12,2,2219.111111  
12,2,2361.870370  
12,2,1594.348837  
12,2,1642.736364  
12,2,2500.733796  
12,2,1564.198980  
12,2,1772.718750  
12,2,1540.266304  
12,2,1974.029255  
12,2,1800.360000  
12,2,4860.543478  
12,2,1647.222222  
12,2,2173.528846  
12,2,6822.059375  
12,2,3049.108974  
12,2,1710.879902  
12,2,2086.346939  
12,2,1638.767857  
12,2,1834.083333

12,2,1664.470588  
12,2,1860.125000  
12,2,1783.459459  
12,2,2270.328947  
12,2,4069.931034  
12,2,2253.937500  
12,2,2061.974490  
12,2,3068.772059  
12,2,2079.258523  
12,2,1683.390625  
12,2,2684.971875  
12,2,1528.414773  
12,2,9807.386792  
12,2,2075.410000  
12,2,1652.491071  
12,2,2636.510870  
12,2,1719.957447  
12,2,1532.875000  
12,2,1866.000000  
12,2,6049.081633  
12,2,1833.835938  
12,2,2060.922500  
12,2,3277.000000  
12,2,1540.959091  
12,2,1769.544643  
12,2,1529.096296  
12,2,2351.744898  
12,2,1610.859375  
12,2,2311.309524  
12,2,4215.015957  
12,2,2955.400000  
12,2,1797.375000  
12,2,2437.007143  
12,2,1611.609375  
12,2,2039.638587  
12,2,2807.190909  
12,2,3251.636364  
12,2,5501.000000  
12,2,1876.750000  
12,2,1588.225543  
12,2,1552.875000  
12,2,1704.635417  
12,2,2638.634615  
12,2,1845.566489  
12,2,1501.579787  
12,2,1606.218750  
12,2,2300.941489  
12,2,4161.093750  
12,2,1542.945946  
12,2,3666.035714  
12,2,1745.473404  
12,2,10028.505682  
12,2,2167.072674  
12,2,3302.062500  
12,2,4742.918367  
12,2,3494.181818  
12,2,2032.663462  
12,2,2155.716837  
12,2,1749.240625  
12,2,1664.958333  
12,2,1582.750000  
12,2,2007.882500  
12,2,1932.883721  
12,2,3026.767857  
12,2,2342.526786  
12,2,2103.556122

12,2,4247.033784  
12,2,1706.073864  
12,2,1727.695652  
12,2,2599.231250  
12,2,1775.487981  
12,2,3764.583333  
12,2,1879.351064  
12,2,1520.784722  
12,2,2926.472656  
12,2,1736.911765  
12,2,6550.993750  
12,2,3026.000000  
12,2,2481.819149  
12,2,2160.762500  
12,2,1911.265244  
12,2,1503.080729  
12,2,3427.669643  
12,2,2544.894737  
12,2,1777.231132  
12,2,1722.287234  
12,2,15311.107558  
12,2,1697.948529  
12,2,1718.617347  
12,2,3381.640957  
12,2,2203.526316  
12,2,1706.764706  
12,2,2511.205556  
12,2,9671.342105  
12,2,1908.810976  
12,2,2287.807018  
12,2,3415.099490  
12,2,1678.615385  
12,2,2400.560976  
12,2,2296.400000  
12,2,1685.937500  
12,2,1553.585227  
12,2,1630.029605  
12,2,2256.000000  
12,2,2449.326271  
12,2,3475.837500  
12,2,3384.169643  
12,2,1657.410000  
12,2,1683.325758  
12,2,1568.160714  
12,2,1852.832237  
12,2,2859.687500  
12,2,1906.730769  
12,2,1588.848684  
12,2,1682.750000  
12,2,2209.788889  
12,2,2592.812500  
12,2,1906.645000  
12,2,3305.052500  
12,2,4108.367925  
12,2,2649.557692  
12,2,2981.847826  
12,2,2073.511628  
12,2,1847.000000  
12,2,3629.091837  
12,2,3250.218750  
12,2,2532.354167  
12,2,1758.132979  
12,2,2355.265957  
12,2,1817.983333  
12,2,1718.567708  
12,2,1583.946078

12,2,1808.774194  
12,2,1625.076531  
12,2,1639.723684  
12,2,1590.641892  
12,2,3540.319712  
12,2,6983.022059  
12,2,3041.177885  
12,2,2329.460674  
12,2,2101.855603  
12,2,2055.477778  
12,2,3846.301829  
12,2,4242.066667  
12,2,1647.843750  
12,2,1749.156250  
12,2,1644.240000  
12,2,1970.825472  
12,2,1879.000000  
12,2,2433.927632  
12,2,1936.714286  
12,2,1748.181548  
12,2,1815.074468  
12,2,3344.055288  
12,2,1621.956522  
12,2,1593.414063  
12,2,1514.319444  
12,2,2596.263636  
12,2,1826.971154  
12,2,1610.514535  
12,2,1784.892442  
12,2,1652.769231  
12,2,2132.355469  
12,2,1654.627976  
12,2,2070.695000  
12,2,1684.649038  
12,2,1847.625000  
12,2,3294.669444  
12,2,4732.247159  
12,2,2800.568750  
12,2,2240.732500  
12,2,11092.577778  
12,2,1510.020833  
12,2,3664.459239  
12,2,4292.863839  
12,2,5171.276786  
12,2,2095.946429  
12,2,1591.892442  
12,2,2804.250000  
12,2,2083.442308  
12,2,1906.355263  
12,2,2999.809524  
12,2,5358.772959  
12,2,1654.612245  
12,2,2233.519231  
12,2,3046.189189  
12,2,1802.750000  
12,2,2537.162791  
12,2,1876.038690  
12,2,2468.762500  
12,2,2626.106618  
12,2,1569.430851  
12,2,1753.392857  
12,2,3851.179245  
12,2,2512.762500  
12,2,3880.636364  
12,2,1883.944444  
12,2,2610.659574

12,2,2414.857143  
12,2,2881.318182  
12,2,2126.375000  
12,2,3526.044872  
12,2,1648.366477  
12,2,1711.806818  
12,2,1512.865385  
12,2,1659.404762  
12,2,1879.959184  
12,2,1914.625000  
12,2,2054.354167  
12,2,1500.056122  
12,2,2243.553191  
12,2,1748.116848  
12,2,2401.042614  
12,2,2274.776744  
12,2,1584.576705  
12,2,2287.010204  
12,2,2207.293269  
12,2,2181.000000  
12,2,7190.801630  
12,2,3501.005435  
12,2,3247.020000  
12,2,1614.043478  
12,2,1838.428571  
12,2,1567.799419  
12,2,3797.136364  
12,2,2755.111111  
12,2,1991.537162  
12,2,4255.596154  
12,2,10710.465116  
12,2,1797.130435  
12,2,4199.039773  
12,2,3619.135417  
12,2,1542.294118  
12,2,1705.640625  
12,2,2579.878261  
12,2,1895.866667  
12,2,2718.080882  
12,2,3956.625000  
12,2,2104.928571  
12,2,1579.735294  
12,2,1520.164474  
12,2,2144.064103  
12,2,1871.204268  
12,2,1782.327128  
12,2,2057.030556  
12,2,2148.263158  
12,2,3287.519231  
12,2,4079.402027  
12,2,1998.306250  
12,2,1904.968750  
12,2,1767.095930  
12,2,2798.850000  
12,2,1575.046512  
12,2,3527.801630  
12,2,3106.675481  
12,2,1930.211111  
12,2,1586.864130  
12,2,2402.920732  
12,2,2095.092391  
12,2,1665.303571  
12,2,2289.321429  
12,2,1703.653846  
12,2,2909.416667  
12,2,2032.500000

12,2,1795.101974  
12,2,3441.851562  
12,2,2582.478723  
12,2,2065.315341  
12,2,1673.526316  
12,2,6605.364865  
12,2,1511.855769  
12,2,1949.075000  
12,2,2651.281250  
12,2,1683.956522  
12,2,1763.161765  
12,2,1607.470930  
12,2,1837.073864  
12,2,1917.864130  
12,2,1744.916667  
12,2,9161.369141  
12,2,1675.505000  
12,2,2772.105978  
12,2,1961.643617  
12,2,2548.802734  
12,2,1839.360465  
12,2,2455.548077  
12,2,1571.920833  
12,2,3656.517857  
12,2,8143.910000  
12,2,1792.893519  
12,2,3793.592105  
12,2,1568.319149  
12,2,2066.510204  
12,2,3046.297619  
12,2,1720.468750  
12,2,1578.389535  
12,2,2404.337838  
12,2,1627.642442  
12,2,2108.418182  
12,2,4118.625000  
12,2,2404.152174  
12,2,1714.264151  
12,2,2636.696429  
12,2,1930.422794  
12,2,4700.421196  
12,2,1873.279762  
12,2,2317.668103  
12,2,1756.383178  
12,2,2106.777174  
12,2,1760.556818  
12,2,3252.000000  
12,2,1682.682927  
12,2,1994.070000  
12,2,2466.240000  
12,2,3150.827500  
12,2,18399.222826  
12,2,1513.788889  
12,2,2852.431548  
12,2,1741.482955  
12,2,3965.068182  
12,2,1953.839286  
12,2,1692.802326  
12,2,2575.125000  
12,2,1652.467593  
12,2,1711.696429  
12,2,2039.777778  
12,2,1730.039894  
12,2,1739.324405  
12,2,1934.824405  
12,2,3552.500000

12,2,2201.062500  
12,2,1741.764706  
12,2,1575.039062  
12,2,1987.865854  
12,2,1569.970745  
12,2,2543.907895  
12,2,1666.030612  
12,2,2091.065217  
12,2,5230.216463  
12,2,1631.864796  
12,2,2050.989362  
12,2,1647.428571  
12,2,1547.158537  
12,2,2042.849057  
12,2,1536.602041  
12,2,1516.984293  
12,2,1936.813953  
12,2,3136.000000  
12,2,2689.225962  
12,2,1866.767857  
12,2,1714.991379  
12,2,5163.513587  
12,2,3092.426829  
12,2,1558.304545  
12,2,1800.372093  
12,2,1814.419643  
12,2,1929.651042  
12,2,2785.294643  
12,2,2086.142442  
12,2,2476.226562  
12,2,1957.304054  
12,2,2106.169643  
12,2,2174.197917  
12,2,3477.627907  
12,2,1767.159314  
12,2,2984.104167  
12,2,1752.147059  
12,2,2744.772500  
12,2,3241.539894  
12,2,1638.770349  
12,2,2562.880734  
12,2,1790.148437  
12,2,1872.070313  
12,2,1667.963415  
12,2,2087.700000  
12,2,2008.084239  
12,2,2205.901316  
12,2,2277.375000  
12,2,2604.570175  
12,2,1796.184783  
12,2,2500.383721  
12,2,4966.286585  
12,2,2360.300926  
12,2,1621.585366  
12,2,2479.398810  
12,2,4540.756757  
12,2,2057.065000  
12,2,1685.468750  
12,2,1513.951220  
12,2,1864.531250  
12,2,2104.429348  
12,2,2707.643750  
12,2,1592.660000  
12,2,2010.662791  
12,2,3345.259259  
12,2,1703.411058

12,2,2529.706633  
12,2,1826.750000  
12,2,1677.032500  
12,2,2310.058824  
12,2,1584.668750  
12,2,5951.659574  
12,2,2050.766304  
12,2,1520.553571  
12,2,2506.100610  
12,2,1552.875000  
12,2,2303.943966  
12,2,2041.791667  
12,2,1734.891892  
12,2,3575.203488  
12,2,14333.979167  
12,2,5998.053191  
12,2,1746.790698  
12,2,2235.250000  
12,2,2348.920000  
12,2,1526.057692  
12,2,2516.329787  
12,2,2841.940476  
12,2,1818.453947  
12,2,4185.722222  
12,2,4201.308824  
12,2,1690.085106  
12,2,1667.857143  
12,2,1905.159091  
12,2,1757.825000  
12,2,2056.573661  
12,2,2499.008523  
12,2,1624.298780  
12,2,15848.077778  
12,2,2384.923295  
12,2,1533.047794  
12,2,2399.750000  
12,2,1958.871622  
12,2,2287.375000  
12,2,1683.192308  
12,2,3076.682432  
12,2,1619.046875  
12,2,1676.357143  
12,2,3318.279255  
12,2,2207.710000  
12,2,2180.000000  
12,2,2071.848404  
12,2,1673.041667  
12,2,2658.651961  
12,2,1516.919283  
12,2,1722.722561  
12,2,2770.260870  
12,2,4550.925532  
12,2,1699.812500  
12,2,2102.665948  
12,2,2453.037500  
12,2,1768.726562  
12,2,2909.328947  
12,2,1899.185976  
12,2,1931.198980  
12,2,2333.250000  
12,2,1536.342262  
12,2,2091.345000  
12,2,2918.806604  
12,2,2784.260000  
12,2,5406.625000  
12,2,2907.489362

12,2,2409.440476  
12,2,1506.416667  
12,2,1813.200581  
12,2,1537.092105  
12,2,2420.392857  
12,2,1848.290909  
12,2,2172.730978  
12,2,2053.540816  
12,2,2000.200000  
12,2,1954.104167  
12,2,2615.053571  
12,2,2883.165698  
12,2,2070.836735  
12,2,3278.551020  
12,2,1935.737981  
12,2,2109.094907  
12,2,1542.314189  
12,2,1928.032609  
12,2,2823.625000  
12,2,1669.140625  
12,2,1673.104651  
12,2,3015.372093  
12,2,1503.064904  
12,2,2333.355263  
12,2,1775.132075  
12,2,1521.875000  
12,2,1903.709184  
12,2,2734.186170  
12,2,2306.467949  
12,2,1958.625000  
12,2,1589.882353  
12,2,2647.888587  
12,2,1506.705882  
12,2,2323.729167  
12,2,1773.677083  
12,2,5260.933140  
12,2,1786.418848  
12,2,1824.302326  
12,2,1969.247159  
12,2,7733.459239  
12,2,1579.027778  
12,2,3335.472973  
12,2,3352.764706  
12,2,1724.578947  
12,2,5913.090116  
12,2,2070.326531  
12,2,1596.000000  
12,2,1560.770833  
12,2,1699.460366  
12,2,3437.416667  
12,2,1999.590909  
12,2,1781.950000  
12,2,2018.214286  
12,2,1719.845745  
12,2,1540.119048  
12,2,8590.468750  
12,2,2120.610465  
12,2,1502.892857  
12,2,3303.702128  
12,2,1583.262195  
12,2,2269.274510  
12,2,1804.355769  
12,2,1870.413043  
12,2,2040.958333  
12,2,1607.518182  
12,2,2862.546875

12,2,2002.178571  
12,2,1504.763158  
12,2,1656.636792  
12,2,10679.162791  
12,2,1608.833333  
12,2,2662.632653  
12,2,1528.718750  
12,2,9498.154762  
12,2,4873.400000  
12,2,1588.357143  
12,2,1595.146226  
12,2,2427.917500  
12,2,3818.921875  
12,2,5157.324074  
12,2,2997.571429  
12,2,2744.000000  
12,2,1879.950000  
12,2,1864.035714  
12,2,1966.072222  
12,2,1730.817073  
12,2,1745.548913  
12,2,2479.183824  
12,2,1950.595745  
12,2,1749.871622  
12,2,1816.297619  
12,2,1631.000000  
12,2,2647.158654  
12,2,1900.662500  
12,2,1913.662791  
12,2,2488.531915  
12,2,17601.529412  
12,2,1512.848214  
12,2,2067.963068  
12,2,1917.500000  
12,2,4655.193182  
12,2,3652.755319  
12,2,1838.652174  
12,2,2117.407407  
12,2,2183.696429  
12,2,2779.428571  
12,2,2747.280702  
12,2,4420.367647  
12,2,3558.619048  
12,2,2378.523810  
12,2,1653.862745  
12,2,1591.794444  
12,2,1528.010638  
12,2,2232.517857  
12,2,2387.703125  
12,2,1648.200000  
12,2,2493.660714  
12,2,12040.207317  
12,2,3098.255952  
12,2,7474.159574  
12,2,2238.494318  
12,2,3209.219595  
12,2,2837.583333  
12,2,1546.517857  
12,2,4770.564103  
12,2,1654.148936  
12,2,4019.002604  
12,2,2633.571429  
12,2,1544.907258  
12,2,3660.107143  
12,2,3482.946429  
12,2,3626.109375

12,2,4005.551136  
12,2,1553.615385  
12,2,1601.372549  
12,2,2040.896341  
12,2,2564.693182  
12,2,3209.000000  
12,2,1860.588235  
12,2,6888.200000  
12,2,2030.500000  
12,2,1558.400000  
12,2,3776.875000  
12,2,2163.878049  
12,2,3310.704082  
12,2,1499.146341  
12,2,1614.318182  
12,2,2306.890000  
12,2,2554.846154  
12,2,1919.300000  
12,2,3132.167411  
12,2,4449.807927  
12,2,2309.730000  
12,2,2682.048611  
12,2,3713.948113  
12,2,3610.512195  
12,2,2393.250000  
12,2,2650.461538  
12,2,1671.632500  
12,2,2760.452128  
12,2,2022.316667  
12,2,4923.500000  
12,2,1661.530612  
12,2,14016.594388  
12,2,3355.520833  
12,2,2040.131944  
12,2,1513.149457  
12,2,2121.658019  
12,2,1614.284375  
12,2,4140.759091  
12,2,2332.790761  
12,2,1522.720745  
12,2,3662.846154  
12,2,2727.318878  
12,2,1848.906250  
12,2,2665.020833  
12,2,1937.466667  
12,2,2675.388298  
12,2,1659.122549  
12,2,2500.121622  
12,2,2187.000000  
12,2,2438.609375  
12,2,2873.796053  
12,2,1577.291667  
12,2,3165.972500  
12,2,2537.666667  
12,2,1973.281250  
12,2,1813.175676  
12,2,1591.534091  
12,2,3217.103365  
12,2,1766.648148  
12,2,1738.541667  
12,2,18288.058036  
12,2,3548.671429  
12,2,3092.058824  
12,2,1501.020408  
12,2,1566.772727  
12,2,1671.855000

12,2,3174.904605  
12,2,1833.960938  
12,2,2160.277344  
12,2,3408.481481  
12,2,3030.617021  
12,2,1556.968750  
12,2,10417.750000  
12,2,1980.904762  
12,2,1778.541667  
12,2,1988.900000  
12,2,2774.875000  
12,2,1774.523256  
12,2,6120.541667  
12,2,1543.743243  
12,2,1676.053571  
12,2,1867.714286  
12,2,1541.107143  
12,2,2443.664634  
12,2,1702.349265  
12,2,2995.671569  
12,2,2729.622596  
12,2,1538.237500  
12,2,1620.837696  
12,2,2266.000000  
12,2,2298.359043  
12,2,1531.187500  
12,2,2028.125000  
12,2,2204.285714  
12,2,4693.533333  
12,2,1768.567568  
12,2,1742.455000  
12,2,3801.530612  
12,2,1584.750000  
12,2,2971.176829  
12,2,2268.416667  
12,2,1854.912791  
12,2,2073.923077  
12,2,2073.651596  
12,2,1928.564286  
12,2,1561.130435  
12,2,1534.091837  
12,2,3891.475543  
12,2,1854.086538  
12,2,2265.218750  
12,2,2761.768293  
12,2,1682.071429  
12,2,1747.909091  
12,2,2833.941176  
12,2,2134.573661  
12,2,2340.232558  
12,2,1533.101064  
12,2,1951.714286  
12,2,1581.341146  
12,2,3079.612500  
12,2,1690.414894  
12,2,2339.692857  
12,2,2019.719512  
12,2,2792.783019  
12,2,1523.380435  
12,2,1512.253125  
12,2,3909.023256  
12,2,1557.333333  
12,2,3039.510204  
12,2,2103.735294  
12,2,1581.732558  
12,2,2868.375000

12,2,1660.698171  
12,2,2347.033708  
12,2,2361.453571  
12,2,1565.139706  
12,2,2002.041667  
12,2,7917.298387  
12,2,3300.098684  
12,2,2376.500000  
12,2,1602.308594  
12,2,2956.529070  
12,2,2363.861963  
12,2,1852.500000  
12,2,2883.850000  
12,2,1707.972222  
12,2,3540.556604  
12,2,3062.782609  
12,2,1765.460000  
12,2,1534.808511  
12,2,3490.403846  
12,2,2496.250000  
12,2,1533.977273  
12,2,3714.851562  
12,2,9392.283784  
12,2,1526.057432  
12,2,2790.125000  
12,2,2122.734694  
12,2,2169.480000  
12,2,3214.666667  
12,2,1879.630000  
12,2,1559.937500  
12,2,1883.121795  
12,2,2101.897436  
12,2,1728.210227  
12,2,1720.560000  
12,2,1801.539474  
12,2,4727.080000  
12,2,2291.237069  
12,2,1810.093023  
12,2,1517.019608  
12,2,1525.931034  
12,2,2680.986111  
12,2,1799.953125  
12,2,1640.469907  
12,2,1510.968085  
12,2,2913.708333  
12,2,1887.349432  
12,2,2041.076923  
12,2,1877.900000  
12,2,2716.011111  
12,2,2609.427419  
12,2,2111.609375  
12,2,2094.285714  
12,2,2548.451705  
12,2,1973.949468  
12,2,12318.285256  
12,2,1771.714286  
12,2,2465.233333  
12,2,2776.000000  
12,2,1659.689189  
12,2,1900.375000  
12,2,4295.506757  
12,2,1949.441860  
12,2,1921.140957  
12,2,1955.010417  
12,2,1715.892857  
12,2,2872.551282

12,2,2146.437500  
12,2,1919.375000  
12,2,5392.298077  
12,2,1506.272059  
12,2,2081.232558  
12,2,4140.043269  
12,2,1564.222561  
12,2,6522.843182  
12,2,2708.444767  
12,2,1564.328125  
12,2,2157.423469  
12,2,2016.234043  
12,2,1619.792683  
12,2,1719.262500  
12,2,1862.875000  
12,2,1756.152439  
12,2,1502.000000  
12,2,3873.575581  
12,2,2806.934211  
12,2,1889.386364  
12,2,4386.189815  
12,2,1932.922170  
12,2,1840.585714  
12,2,1819.428571  
12,2,1952.024194  
12,2,2731.002500  
12,2,1799.475543  
12,2,2501.636364  
12,2,4891.581967  
12,2,2418.800481  
12,2,1627.820513  
12,2,1510.910000  
12,2,1785.203125  
12,2,1925.117188  
12,2,1746.960000  
12,2,1579.907895  
12,2,7718.000000  
12,2,1889.000000  
12,2,2800.122340  
12,2,1612.367188  
12,2,1665.687500  
12,2,2266.644444  
12,2,3458.978723  
12,2,2319.678977  
12,2,3458.148810  
12,2,3586.359375  
12,2,1523.729381  
12,2,2475.970930  
12,2,1815.111702  
12,2,2636.000000  
12,2,2245.129630  
12,2,2987.250000  
12,2,1677.028409  
12,2,1961.765000  
12,2,2429.489362  
12,2,2062.481481  
12,2,2661.742188  
12,2,1585.618902  
12,2,1680.829545  
12,2,1801.300000  
12,2,2103.291667  
12,2,1551.073171  
12,2,1634.722222  
12,2,1766.301630  
12,2,3397.431373  
12,2,3470.187500

12,2,1871.955729  
12,2,2632.487805  
12,2,1647.343750  
12,2,2479.980392  
12,2,2534.360465  
12,2,1518.481818  
12,2,4720.275862  
12,2,4290.792763  
12,2,1708.338942  
12,2,8310.571970  
12,2,1780.262500  
12,2,1632.669811  
12,2,4512.910714  
12,2,2701.500000  
12,2,2048.381579  
12,2,1750.833333  
12,2,1980.684783  
12,2,7031.776596  
12,2,1624.610000  
12,2,2448.827500  
12,2,1850.778846  
12,2,1787.218750  
12,2,1705.570312  
12,2,3047.154412  
12,2,1989.642857  
12,2,2003.627551  
12,2,2052.692568  
12,2,1912.867347  
12,2,3239.562500  
12,2,1766.069149  
12,2,1806.096154  
12,2,3385.372093  
12,2,10885.030675  
12,2,2897.019231  
12,2,1765.428571  
12,2,2031.636364  
12,2,1744.909091  
12,2,2797.704082  
12,2,1647.910714  
12,2,16007.253125  
12,2,2633.250000  
12,2,4061.701087  
12,2,2507.250000  
12,2,1678.668919  
12,2,2124.458333  
12,2,1581.520408  
12,2,2394.586957  
12,2,1650.231707  
12,2,1913.181818  
12,2,2729.415948  
12,2,1520.065678  
12,2,2141.337264  
12,2,1968.351351  
12,2,1755.510870  
12,2,2724.698529  
12,2,4801.093750  
12,2,2077.422619  
12,2,1569.666667  
12,2,3200.196023  
12,2,1692.861486  
12,2,1572.281250  
12,2,4242.937500  
12,2,2111.606481  
12,2,17496.423780  
12,2,1688.935829  
12,2,2722.952586

12,2,1858.026786  
12,2,1951.744898  
12,2,5032.321429  
12,2,1553.010870  
12,2,2791.625000  
12,2,2180.530093  
12,2,1647.906250  
12,2,2480.372449  
12,2,1516.834677  
12,2,2184.937500  
12,2,2134.178571  
12,2,1555.348214  
12,2,1764.385870  
12,2,1956.924242  
12,2,2688.071429  
12,2,2345.434783  
12,2,2153.140351  
12,2,2172.652027  
12,2,1707.450000  
12,2,1698.522222  
12,2,1948.844340  
12,2,1631.675595  
12,2,1680.540865  
12,2,1931.023256  
12,2,1719.109694  
12,2,1722.500000  
12,2,2384.160714  
12,2,1590.557500  
12,2,1987.519737  
12,2,1818.380208  
12,2,1865.000000  
12,2,2038.027027  
12,2,1694.375000  
12,2,2142.502778  
12,2,2635.740385  
12,2,1795.141304  
12,2,4890.326923  
12,2,1815.322404  
12,2,1693.029412  
12,2,2028.692308  
12,2,2926.992647  
12,2,1526.656250  
12,2,2505.722222  
12,2,3691.478261  
12,2,2391.737500  
12,2,2537.724490  
12,2,2747.400000  
12,2,2226.785714  
12,2,1502.607143  
12,2,1850.027273  
12,2,2987.083333  
12,2,2205.839378  
12,2,2893.690476  
12,2,1526.836111  
12,2,2838.808824  
12,2,1897.212766  
12,2,1585.963415  
12,2,1751.625000  
12,2,1874.005814  
12,2,2475.088068  
12,2,1784.113095  
12,2,1744.328947  
12,2,1584.960227  
12,2,1528.867788  
12,2,1719.922500  
12,2,7985.559375

12,2,1520.100000  
12,2,1576.726562  
12,2,2421.545455  
12,2,15183.792763  
12,2,2126.691860  
12,2,1509.264706  
12,2,5187.821078  
12,2,2577.000000  
12,2,3080.500000  
12,2,2882.026316  
12,2,1505.562500  
12,2,1604.081522  
12,2,1722.763158  
12,2,1789.670213  
12,2,2035.155556  
12,2,5250.656250  
12,2,2708.548780  
12,2,1600.583333  
12,2,1505.310976  
12,2,2400.045455  
12,2,5877.209459  
12,2,1913.009434  
12,2,1576.730769  
12,2,1881.550676  
12,2,1972.732558  
12,2,1926.817073  
12,2,1650.267857  
12,2,1640.790698  
12,2,2028.444444  
12,2,7207.861486  
12,2,2688.133333  
12,2,1564.448529  
12,2,1631.375000  
12,2,1740.762500  
12,2,2767.793269  
12,2,2326.272727  
12,2,3335.534884  
12,2,1983.308333  
12,2,3003.845000  
12,2,1932.581633  
12,2,2544.912500  
12,2,2059.985119  
12,2,1533.794872  
12,2,1942.622642  
12,2,1627.328804  
12,2,1535.768750  
12,2,1797.250000  
12,2,1633.061047  
12,2,2127.653061  
12,2,2584.125000  
12,2,1839.396875  
12,2,2174.625000  
12,2,4685.490566  
12,2,1642.756098  
12,2,2649.189103  
12,2,2600.262712  
12,2,1654.482955  
12,2,1907.344444  
12,2,9009.132353  
12,2,2080.555556  
12,2,1520.134375  
12,2,4029.811275  
12,2,1510.950000  
12,2,2016.973214  
12,2,1585.828947  
12,2,1516.612500

12,2,1516.712766  
12,2,3745.422619  
12,2,1835.041667  
12,2,1597.828488  
12,2,2231.715909  
12,2,1670.569079  
12,2,1611.700000  
12,2,1676.232558  
12,2,1637.075658  
12,2,3703.000000  
12,2,1562.959091  
12,2,1699.673913  
12,2,1523.350000  
12,2,7732.218750  
12,2,1826.944712  
12,2,3684.625000  
12,2,1860.966216  
12,2,3683.285714  
12,2,2102.416667  
12,2,2231.793750  
12,2,2357.384259  
12,2,2191.899390  
12,2,1636.625000  
12,2,1868.651163  
12,2,2039.928125  
12,2,1518.523810  
12,2,3046.166667  
12,2,1805.235849  
12,2,2415.125000  
12,2,1664.009615  
12,2,1748.829787  
12,2,2336.438889  
12,2,1747.140000  
12,2,2499.107955  
12,2,1826.575000  
12,2,1687.154070  
12,2,1992.425532  
12,2,2333.306122  
12,2,3420.000000  
12,2,4519.106383  
12,2,1608.535714  
12,2,3111.113208  
12,2,1811.529412  
12,2,2324.169811  
12,2,2418.900000  
12,2,1535.589286  
12,2,16049.107955  
12,2,1676.449468  
12,2,2338.902439  
12,2,1627.718750  
12,2,1554.250000  
12,2,2323.692308  
12,2,1779.500000  
12,2,1631.958333  
12,2,3298.796296  
12,2,1714.285714  
12,2,3018.144737  
12,2,2832.650000  
12,2,1988.447368  
12,2,1888.574468  
12,2,1910.152778  
12,2,2437.723214  
12,2,1565.243243  
12,2,1852.489796  
12,2,1552.860119  
12,2,2232.166667

12,2,2745.789216  
12,2,1668.607143  
12,2,1526.238636  
12,2,1752.632353  
12,2,1993.950000  
12,2,1505.916667  
12,2,1580.416667  
12,2,2515.150000  
12,2,5979.428571  
12,2,1523.543478  
12,2,1779.649510  
12,2,1658.952381  
12,2,2465.647059  
12,2,1614.356707  
12,2,2107.238208  
12,2,2860.666667  
12,2,1809.971154  
12,2,1518.500000  
12,2,2090.910959  
12,2,2171.957447  
12,2,3635.636364  
12,2,2368.053191  
12,2,3383.720588  
12,2,2305.106771  
12,2,1690.932500  
12,2,2006.800000  
12,2,2731.799213  
12,2,2408.535714  
12,2,3591.932065  
12,2,1594.317073  
12,2,2182.056122  
12,2,1768.573171  
12,2,1920.563830  
12,2,4330.825000  
12,2,1946.275000  
12,2,2507.693182  
12,2,2919.658088  
12,2,2989.223361  
12,2,1597.909091  
12,2,1813.351562  
12,2,2405.539474  
12,2,1509.036585  
12,2,1800.521341  
12,2,1965.285714  
12,2,3644.500000  
12,2,4741.558824  
12,2,1776.490196  
12,2,2559.472973  
12,2,1601.963415  
12,2,2059.547486  
12,2,1734.500000  
12,2,1854.428571  
12,2,2955.990196  
12,2,1587.473039  
12,2,2188.331395  
12,2,2162.677083  
12,2,1583.227273  
12,2,1590.020833  
12,2,3058.234375  
12,2,2067.479592  
12,2,2517.412500  
12,2,1713.589286  
12,2,2887.647436  
12,2,7275.305921  
12,2,1586.336207  
12,2,6719.400000

12,2,2970.251282  
12,2,2271.614362  
12,2,2782.963415  
12,2,1691.509375  
12,2,2400.000000  
12,2,1545.765957  
12,2,1674.145833  
12,2,1986.780488  
12,2,2994.800000  
12,2,4758.050000  
12,2,1824.236842  
12,2,2364.054348  
12,2,1771.263158  
12,2,1798.305000  
12,2,1540.259146  
12,2,2829.574324  
12,2,1658.604167  
12,2,1504.362245  
12,2,1638.700000  
12,2,1611.015957  
12,2,2568.392857  
12,2,1590.193452  
12,2,5467.861842  
12,2,1908.375000  
12,2,1705.862434  
12,2,1658.567935  
12,2,1518.644737  
12,2,2409.846154  
12,2,1827.277439  
12,2,5084.500000  
12,2,1597.740854  
12,2,1549.339286  
12,2,1508.375000  
12,2,1574.350000  
12,2,1572.518519  
12,2,2700.000000  
12,2,1678.063776  
12,2,1585.172794  
12,2,1788.968750  
12,2,2272.070000  
12,2,1809.567568  
12,2,3131.134146  
12,2,1793.250000  
12,2,1969.250000  
12,2,4770.391667  
12,2,4012.436364  
12,2,6335.583333  
12,2,1846.328804  
12,2,3553.129717  
12,2,1621.585227  
12,2,1990.892857  
12,2,2965.042763  
12,2,1619.555556  
12,2,1567.085937  
12,2,2320.950000  
12,2,1548.035000  
12,2,1759.390306  
12,2,5591.395833  
12,2,2015.436364  
12,2,2144.204545  
12,2,2318.490000  
12,2,1546.909091  
12,2,8635.200000  
12,2,1684.540698  
12,2,1882.187500  
12,2,1696.320122

12,2,1847.718750  
12,2,1834.831522  
12,2,3359.437500  
12,2,2612.200000  
12,2,1606.075000  
12,2,2732.759615  
12,2,2046.230000  
12,2,2991.705357  
12,2,2124.054054  
12,2,1879.118421  
12,2,2817.239362  
12,2,1820.378378  
12,2,1917.433824  
12,2,1798.975000  
12,2,1881.684211  
12,2,1795.567073  
12,2,2147.360000  
12,2,11452.060606  
12,2,2162.794643  
12,2,16360.976974  
12,2,1905.956522  
12,2,2691.043478  
12,2,1877.956522  
12,2,2540.648936  
12,2,1826.245000  
12,2,2542.142857  
12,2,2001.448171  
12,2,1726.272727  
12,2,4650.840000  
12,2,1597.909574  
12,2,1590.903846  
12,2,7533.892241  
12,2,1944.818966  
12,2,2091.703804  
12,2,10831.929878  
12,2,3154.423295  
12,2,2076.833333  
12,2,3699.576923  
12,2,2211.880000  
12,2,2573.865854  
12,2,6697.930000  
12,2,1712.000000  
12,2,1527.684375  
12,2,1791.189732  
12,2,3189.346939  
12,2,1940.833333  
12,2,5484.875000  
12,2,2703.143617  
12,2,1891.656250  
12,2,4147.003676  
12,2,12752.819444  
12,2,2099.965000  
12,2,2757.666667  
12,2,1771.155556  
12,2,1565.002326  
12,2,1571.875000  
12,2,1743.750000  
12,2,1558.485000  
12,2,1719.586207  
12,2,1781.369318  
12,2,7412.111702  
12,2,1506.304348  
12,2,1912.656863  
12,2,1826.250000  
12,2,1517.627976  
12,2,8698.577128

12,2,1649.750000  
12,2,2942.178571  
12,2,3700.584375  
12,2,2094.880000  
12,2,1550.208333  
12,2,1630.068452  
12,2,1514.943396  
12,2,1665.666667  
12,2,1603.429878  
12,2,1876.110000  
12,2,3690.625000  
12,2,2201.990385  
12,2,10706.755952  
12,2,3532.750000  
12,2,3564.425532  
12,2,1553.843137  
12,2,2256.450000  
12,2,2841.702128  
12,2,1966.470588  
12,2,2559.205128  
12,2,4606.326220  
12,2,1773.445122  
12,2,2866.275735  
12,2,1526.300000  
12,2,1743.929487  
12,2,2637.230769  
12,2,3101.300000  
12,2,3633.347561  
12,2,1909.293478  
12,2,2827.901961  
12,2,1991.146789  
12,2,4092.500000  
12,2,7934.652439  
12,2,2061.475000  
12,2,2430.254545  
12,2,2028.036585  
12,2,1711.199324  
12,2,2562.020408  
12,2,2920.322368  
12,2,2494.023256  
12,2,1948.015625  
12,2,2711.719340  
12,2,2101.986111  
12,2,1670.285714  
12,2,1943.111111  
12,2,1604.500000  
12,2,2252.312500  
12,2,2034.936170  
12,2,1709.050000  
12,2,3868.881579  
12,2,2902.061224  
12,2,1549.571429  
12,2,1890.583333  
12,2,1506.965426  
12,2,1583.747159  
12,2,2617.315789  
12,2,3056.157343  
12,2,1829.622222  
12,2,1545.129630  
12,2,2516.437500  
12,2,1662.375000  
12,2,1738.896277  
12,2,1986.599432  
12,2,2617.732143  
12,2,4229.104651  
12,2,4636.250000

12,2,2691.453488  
12,2,1606.662791  
12,2,1589.986486  
12,2,1934.000000  
12,2,1786.840000  
12,2,2540.437500  
12,2,2269.580357  
12,2,3925.112245  
12,2,2562.949519  
12,2,1667.883065  
12,2,3257.335106  
12,2,6266.816860  
12,2,2489.196429  
12,2,2327.250000  
12,2,2136.291667  
12,2,1525.653846  
12,2,2141.446809  
12,2,7343.815789  
12,2,1747.119681  
12,2,1840.029412  
12,2,1601.239130  
12,2,2403.797297  
12,2,2099.214286  
12,2,1896.574324  
12,2,2580.732143  
12,2,2347.866667  
12,2,1557.744681  
12,2,1921.841912  
12,2,2887.100000  
12,2,1718.572917  
12,2,3368.883721  
12,2,2958.235556  
12,2,1575.875000  
12,2,3989.240385  
12,2,2129.773438  
12,2,1898.339286  
12,2,1848.086310  
12,2,1540.622549  
12,2,1509.214286  
12,2,1586.317500  
12,2,4574.257353  
12,2,1592.065341  
12,2,4943.205882  
12,2,2329.833333  
12,2,2123.005102  
12,2,2110.315068  
12,2,1884.866667  
12,2,2020.941176  
12,2,2051.823529  
12,2,2502.073529  
12,2,1653.885417  
12,2,1837.255814  
12,2,1623.531250  
12,2,1582.796875  
12,2,7139.451389  
12,2,1941.303571  
12,2,1893.058824  
12,2,1573.509615  
12,2,4256.100610  
12,2,2363.903061  
12,2,1558.875000  
12,2,2013.850000  
12,2,4980.268293  
12,2,2046.541667  
12,2,2598.143713  
12,2,4010.195122

12,2,2965.656250  
12,2,1695.438889  
12,2,1574.445312  
12,2,2033.677083  
12,2,1611.039474  
12,2,2361.872500  
12,2,1550.892157  
12,2,1525.115385  
12,2,1579.500000  
12,2,2663.561224  
12,2,3640.362500  
12,2,1935.132813  
12,2,1554.729651  
12,2,1514.678571  
12,2,1814.235294  
12,2,1643.250000  
12,2,1712.500000  
12,2,1947.786765  
12,2,1829.283784  
12,2,2060.180905  
12,2,3142.562500  
12,2,1499.092391  
12,2,1759.107143  
12,2,3983.857500  
12,2,2059.520833  
12,2,2415.714286  
12,2,2786.214286  
12,2,1500.500000  
12,2,1581.076923  
12,2,1716.912736  
12,2,1543.692308  
12,2,3148.415816  
12,2,1635.250000  
12,2,1621.000000  
12,2,2404.476190  
12,2,1819.402174  
12,2,2187.250000  
12,2,1948.596354  
12,2,5522.950000  
12,2,1910.000000  
12,2,4132.518229  
12,2,1774.000000  
12,2,7022.357143  
12,2,1596.111842  
12,2,10818.105263  
12,2,1907.166667  
12,2,1619.584302  
12,2,1599.680328  
12,2,3558.103261  
12,2,8331.303191  
12,2,3113.176020  
12,2,2402.228365  
12,2,3024.596154  
12,2,1836.063725  
12,2,2317.719512  
12,2,2354.913613  
12,2,1538.000000  
12,2,1769.686170  
12,2,2262.420000  
12,2,2406.812500  
12,2,1751.114865  
12,2,3937.808824  
12,2,3765.830882  
12,2,1599.550000  
12,2,1551.971154  
12,2,1811.315972

12,2,2115.422872  
12,2,1639.294643  
12,2,1650.612500  
12,2,1797.710938  
12,2,2089.458333  
12,2,2400.283654  
12,2,3458.328947  
12,2,1785.910112  
12,2,2821.694767  
12,2,1620.630435  
12,2,2866.274390  
12,2,1736.589744  
12,2,3822.398477  
12,2,1561.228659  
12,2,2971.800532  
12,2,2363.178571  
12,2,2131.092500  
12,2,2289.415541  
12,2,2597.636364  
12,2,1839.385965  
12,2,2600.893382  
12,2,1690.000000  
12,2,1938.638889  
12,2,2906.156915  
12,2,1655.696809  
12,2,1713.727273  
12,2,2307.847826  
12,2,2961.011364  
12,2,2005.075301  
12,2,2106.180000  
12,2,6957.640244  
12,2,2023.891892  
12,2,1962.920000  
12,2,1503.664894  
12,2,2365.493590  
12,2,3276.419118  
12,2,1731.385417  
12,2,5615.880000  
12,2,2074.437500  
12,2,1636.058333  
12,2,1707.239362  
12,2,1499.903061  
12,2,3821.571078  
12,2,2009.012195  
12,2,1752.178571  
12,2,2766.991667  
12,2,1798.103659  
12,2,2283.387500  
12,2,1627.660377  
12,2,2287.347826  
12,2,3213.785714  
12,2,1945.068627  
12,2,2843.566038  
12,2,1768.433962  
12,2,2206.809524  
12,2,2131.148936  
12,2,1506.014205  
12,2,3944.338235  
12,2,2311.352941  
12,2,1499.085714  
12,2,2530.041667  
12,2,2400.053571  
12,2,2105.130952  
12,2,1935.037037  
12,2,2846.063830  
12,2,1954.336538

12,2,2449.017857  
12,2,2170.053571  
12,2,1624.619048  
12,2,2359.889535  
12,2,3217.093137  
12,2,2506.472500  
12,2,2300.110849  
12,2,2478.180000  
12,2,1606.000000  
12,2,1808.928571  
12,2,1967.086310  
12,2,3130.750000  
12,2,4853.459135  
12,2,1788.000000  
12,2,1680.294444  
12,2,3628.910256  
12,2,1798.375000  
12,2,2095.297872  
12,2,7182.086957  
12,2,2321.959821  
12,2,4373.563830  
12,2,1539.101695  
12,2,1755.687500  
12,2,2096.291667  
12,2,1637.763158  
12,2,2775.984043  
12,2,2218.957143  
12,2,1780.195122  
12,2,1657.878049  
12,2,1794.704545  
12,2,1567.536932  
12,2,8350.632979  
12,2,12103.383721  
12,2,2868.725610  
12,2,1644.030000  
12,2,1607.469388  
12,2,1948.880319  
12,2,1706.528061  
12,2,1596.719444  
12,2,2349.421875  
12,2,2828.311364  
12,2,1617.565000  
12,2,1632.613095  
12,2,1710.317708  
12,2,2212.612981  
12,2,3567.062500  
12,2,7589.136364  
12,2,1566.148438  
12,2,3163.375000  
12,2,1502.125000  
12,2,6275.357558  
12,2,1984.461957  
12,2,1692.888021  
12,2,2561.140625  
12,2,1542.689189  
12,2,1509.576705  
12,2,1505.156915  
12,2,1944.945122  
12,2,2104.456250  
12,2,2025.493902  
12,2,4053.309524  
12,2,3057.022727  
12,2,1809.492925  
12,2,1869.412234  
12,2,1696.245000  
12,2,1575.695652

12,2,1625.221154  
12,2,2685.885135  
12,2,1542.044118  
12,2,3317.285000  
12,2,1583.219512  
12,2,1502.633333  
12,2,1825.390351  
12,2,1789.718750  
12,2,2995.154762  
12,2,2211.852273  
12,2,1985.625000  
12,2,1923.909574  
12,2,2126.904762  
12,2,1607.015306  
12,2,2406.611111  
12,2,5153.805147  
12,2,2202.645833  
12,2,1891.440000  
12,2,1513.446875  
12,2,1511.232955  
12,2,1548.581395  
12,2,1542.432065  
12,2,5855.997222  
12,2,2021.661932  
12,2,1535.994565  
12,2,1508.416667  
12,2,6796.188953  
12,2,1779.701923  
12,2,3917.666667  
12,2,1614.829787  
12,2,2421.438679  
12,2,1899.825000  
12,2,1695.139205  
12,2,3494.956522  
12,2,2766.525000  
12,2,2066.508721  
12,2,1867.943452  
12,2,2186.534091  
12,2,1552.470588  
12,2,2356.704545  
12,2,1658.440476  
12,2,2510.240132  
12,2,2654.024390  
12,2,2032.938776  
12,2,2065.571809  
12,2,2606.578431  
12,2,1609.905556  
12,2,2075.079545  
12,2,1595.046875  
12,2,5528.241071  
12,2,3238.100000  
12,2,14069.598958  
12,2,1785.408537  
12,2,4115.039634  
12,2,1897.769634  
12,2,1536.875000  
12,2,1878.096154  
12,2,3210.298913  
12,2,2134.828804  
12,2,2997.581633  
12,2,1764.395833  
12,2,2911.449468  
12,2,2766.889706  
12,2,1697.062500  
12,2,1579.646429  
12,2,1884.121875

12,2,2159.923077  
12,2,2839.086538  
12,2,1565.068182  
12,2,2072.269231  
12,2,1552.516447  
12,2,1518.565789  
12,2,2869.423077  
12,2,1646.463816  
12,2,2254.375000  
12,2,3637.740132  
12,2,1896.478723  
12,2,1629.247449  
12,2,1612.102564  
12,2,3567.785714  
12,2,1596.324324  
12,2,11531.334821  
12,2,1635.101064  
12,2,1767.640000  
12,2,2211.767857  
12,2,2059.625000  
12,2,2967.392157  
12,2,1525.747283  
12,2,1584.455000  
12,2,1773.615385  
12,2,2564.120000  
12,2,1961.000000  
12,2,1977.904255  
12,2,3938.650000  
12,2,1924.752660  
12,2,2955.428571  
12,2,1759.121875  
12,2,2313.587963  
12,2,2116.226190  
12,2,1750.984375  
12,2,1829.625000  
12,2,2144.636364  
12,2,2414.448529  
12,2,2327.433333  
12,2,4093.543478  
12,2,4342.145349  
12,2,2132.737745  
12,2,1852.078125  
12,2,2338.803571  
12,2,2093.900000  
12,2,2186.750000  
12,2,2166.301887  
12,2,1880.792683  
12,2,2312.595745  
12,2,1643.113636  
12,2,3183.221354  
12,2,2134.275510  
12,2,1565.340426  
12,2,1540.394444  
12,2,1690.459906  
12,2,5506.144231  
12,2,1542.228571  
12,2,2106.054688  
12,2,1613.780556  
12,2,2602.619318  
12,2,1615.785377  
12,2,1668.323864  
12,2,2152.618421  
12,2,1920.884615  
12,2,1506.696023  
12,2,2178.208333  
12,2,1533.240000

12,2,1985.162500  
12,2,1547.882500  
12,2,2875.000000  
12,2,1564.760000  
12,2,3421.602273  
12,2,2847.037736  
12,2,2559.566327  
12,2,1541.263021  
12,2,1873.400000  
12,2,1975.394886  
12,2,2505.144022  
13,1,3817.828125  
13,1,8303.230769  
13,1,1913.993902  
13,1,5313.277027  
13,1,4525.733333  
13,1,4215.910326  
13,1,2900.854167  
13,1,8143.722561  
13,1,17958.000000  
13,1,1888.072581  
13,1,10748.017241  
13,1,1545.127907  
13,1,5871.464286  
13,1,11883.638889  
13,1,4803.190217  
13,1,12406.964286  
13,1,8151.372159  
13,1,2123.524390  
13,1,5572.526316  
13,1,6798.387195  
13,1,2317.538462  
13,1,2074.869792  
13,1,2254.758523  
13,1,2813.500000  
13,1,4120.333333  
13,1,5833.410156  
13,1,6407.854730  
13,1,14061.122222  
13,1,8223.000000  
13,1,4284.101744  
13,1,9575.121951  
13,1,5302.651786  
13,1,1927.742188  
13,1,4951.370192  
13,1,4276.740132  
13,1,3627.044444  
13,1,7808.838710  
13,1,11640.056250  
13,1,4538.801282  
13,1,4187.535714  
13,1,13168.833333  
13,1,4084.681818  
13,1,1984.540698  
13,1,1592.159574  
13,1,7759.066860  
13,1,1941.303571  
13,1,3500.695312  
13,1,7003.360294  
13,1,2795.771429  
13,1,4271.266129  
13,1,2159.382353  
13,1,13185.979651  
13,1,14369.428571  
13,1,4398.352941  
13,1,1818.242647

13,1,8017.242857  
13,1,2615.134615  
13,1,3865.877717  
13,1,3778.525735  
13,1,1838.209302  
13,1,2248.565476  
13,1,14040.385135  
13,1,1829.888889  
13,1,1960.810811  
13,1,3782.661765  
13,1,2394.436224  
13,1,6159.741071  
13,1,2209.000000  
13,1,4705.875000  
13,1,8051.380435  
13,1,5135.993421  
13,1,4471.812500  
13,1,1526.975610  
13,1,1766.225806  
13,1,5778.729167  
13,1,1685.572917  
13,1,5340.156250  
13,1,7457.000000  
13,1,5021.162162  
13,1,1727.683824  
13,1,13730.655405  
13,1,5616.625000  
13,1,2443.831081  
13,1,2732.894737  
13,1,1708.563953  
13,1,6740.312500  
13,1,8512.321429  
13,1,4885.010417  
13,1,2470.091216  
13,1,3859.441860  
13,1,3601.142857  
13,1,10287.578947  
13,1,1932.134615  
13,1,5569.244792  
13,1,2975.509259  
13,1,4318.761905  
13,1,5582.112500  
13,1,11475.538462  
13,1,6680.800000  
13,1,7409.670455  
13,1,6692.336310  
13,1,2454.846939  
13,1,5786.324324  
13,1,12546.347826  
13,1,6626.642857  
13,1,8973.867647  
13,1,2022.446809  
13,1,3520.640000  
13,1,2271.320312  
13,1,1948.073718  
13,1,2943.523810  
13,1,3730.702703  
13,1,3375.395833  
13,1,2219.821429  
13,1,2026.762195  
13,1,4012.496622  
13,1,15002.340000  
13,1,3676.375000  
13,1,1728.611111  
13,1,1638.625000  
13,1,5515.894231

13,1,3167.674419  
13,1,1595.371795  
13,1,2266.963889  
13,1,10220.731771  
13,1,1719.505682  
13,1,14101.260417  
13,1,18364.556818  
13,1,16940.648438  
13,1,7793.000000  
13,1,1746.759146  
13,1,3923.977273  
13,1,3850.761029  
13,1,2287.564904  
13,1,3916.937500  
13,1,13831.844595  
13,1,17665.466667  
13,1,12716.621875  
13,1,6937.312500  
13,1,2614.829268  
13,1,4985.231250  
13,1,5334.914634  
13,1,6659.000000  
13,1,4342.514535  
13,1,6794.470588  
13,1,3955.214844  
13,1,1812.333333  
13,1,6213.359375  
13,1,5400.667763  
13,1,2463.944853  
13,1,2157.631579  
13,1,7885.076087  
13,1,1893.279070  
13,1,10285.405488  
13,1,11921.242187  
13,1,4368.250000  
13,1,12207.428977  
13,1,3555.196429  
13,1,7771.250000  
13,1,1786.094444  
13,1,4534.346154  
13,1,4362.090909  
13,1,3918.097561  
13,1,2836.958333  
13,1,2585.333333  
13,1,5409.151515  
13,1,1790.866667  
13,1,2490.937500  
13,1,2269.980769  
13,1,3670.902439  
13,1,1654.762500  
13,1,5938.378049  
13,1,4805.937500  
13,1,1761.000000  
13,1,2639.764706  
13,1,8357.172794  
13,1,3335.617647  
13,1,7823.781250  
13,1,5168.613636  
13,1,8124.363636  
13,1,1750.441176  
13,1,9352.892857  
13,1,3523.581395  
13,1,3688.125000  
13,1,1634.971591  
13,1,2866.951613  
13,1,16012.000000

13,1,1861.941176  
13,1,4343.500000  
13,1,3697.293367  
13,1,2354.478261  
13,1,9326.425000  
13,1,2271.295918  
13,1,1605.176829  
13,1,1727.217949  
13,1,2136.250000  
13,1,4690.241667  
13,1,2740.600000  
13,1,1859.454545  
13,1,19947.700000  
13,1,6479.948171  
13,1,9563.312500  
13,1,5573.279412  
13,1,1786.359375  
13,1,11395.736842  
13,1,2268.035714  
13,1,2734.716667  
13,1,2632.750000  
13,1,1913.524390  
13,1,2201.160714  
13,1,4668.901786  
13,1,18284.941406  
13,1,3414.926829  
13,1,7919.385714  
13,1,10941.383333  
13,1,7919.000000  
13,1,13026.315789  
13,1,1858.676829  
13,1,3718.676282  
13,1,12367.644231  
13,1,8767.423611  
13,1,11791.744318  
13,1,3828.723684  
13,1,2131.431818  
13,1,2962.107143  
13,1,2556.428241  
13,1,2245.222561  
13,1,2868.346154  
13,1,2358.594444  
13,1,1604.275862  
13,1,2506.000000  
13,1,3685.750000  
13,1,2664.077778  
13,1,12619.500000  
13,1,1912.142857  
13,1,5340.076923  
13,1,12374.476744  
13,1,10065.702206  
13,1,6449.188953  
13,1,5869.109756  
13,1,5645.000000  
13,1,1961.875000  
13,1,4837.945946  
13,1,2705.267857  
13,1,4567.274390  
13,1,1734.281250  
13,1,8591.888889  
13,1,6660.608696  
13,1,8109.816176  
13,1,2467.444444  
13,1,2026.487500  
13,1,5284.190104  
13,1,10079.049479

13,1,11782.121622  
13,1,1511.616071  
13,1,4686.487805  
13,1,4215.840909  
13,1,17513.250000  
13,1,3210.712121  
13,1,2805.500000  
13,1,5385.853448  
13,1,2854.503571  
13,1,2023.602273  
13,1,18215.943182  
13,1,6004.164634  
13,1,1750.022222  
13,1,5608.720109  
13,1,2761.915323  
13,1,1758.796875  
13,1,14250.666667  
13,1,1748.714286  
13,1,3213.163462  
13,1,2004.632353  
13,1,3239.644022  
13,1,11359.008065  
13,1,2511.791667  
13,1,1879.781250  
13,1,2190.887931  
13,1,1567.653846  
13,1,3996.000000  
13,1,2774.023810  
13,1,3294.681452  
13,1,6401.500000  
13,1,14065.315789  
13,1,5229.400735  
13,1,6257.750000  
13,1,2073.987500  
13,1,7605.567568  
13,1,3145.647059  
13,1,3325.706250  
13,1,2988.018382  
13,1,2403.175676  
13,1,14467.107143  
13,1,1764.258065  
13,1,5641.288462  
13,1,3936.718750  
13,1,10464.113281  
13,1,1814.894231  
13,1,1640.145833  
13,1,6999.291667  
13,1,7860.781915  
13,1,3493.359043  
13,1,3110.041667  
13,1,2771.636364  
13,1,3603.920455  
13,1,3489.802632  
13,1,10176.487500  
13,1,5830.000000  
13,1,7856.457317  
13,1,5254.258333  
13,1,6874.664474  
13,1,5979.923611  
13,1,4763.940972  
13,1,2358.609375  
13,1,2047.315789  
13,1,1709.424342  
13,1,3691.250000  
13,1,6059.659722  
13,1,4167.132812

13,1,5411.525000  
13,1,7688.871324  
13,1,3008.978723  
13,1,2710.500000  
13,1,3656.994792  
13,1,11619.226562  
13,1,8104.666667  
13,1,6309.300000  
13,1,18091.953947  
13,1,5569.102941  
13,1,15099.857143  
13,1,4298.198529  
13,1,1906.800676  
13,1,1693.875000  
13,1,12125.325758  
13,1,3288.733333  
13,1,2807.863636  
13,1,1943.500000  
13,1,11205.212500  
13,1,2174.456250  
13,1,17595.691489  
13,1,2149.567708  
13,1,7297.705882  
13,1,4803.618421  
13,1,4555.906250  
13,1,2713.919118  
13,1,6880.920455  
13,1,2890.875000  
13,1,2655.591912  
13,1,2342.784091  
13,1,2897.019231  
13,1,2818.642442  
13,1,6096.565217  
13,1,8429.416667  
13,1,5238.734375  
13,1,3040.719512  
13,1,7914.340116  
13,1,2675.015957  
13,1,2614.069767  
13,1,6692.187500  
13,1,2011.894231  
13,1,4526.855556  
13,1,1678.534884  
13,1,8648.794872  
13,1,3052.941489  
13,1,8346.235294  
13,1,7959.910714  
13,1,2229.040441  
13,1,2326.396277  
13,1,4148.625000  
13,1,5205.904412  
13,1,6187.783333  
13,1,2431.900000  
13,1,1581.731250  
13,1,2392.709302  
13,1,4332.717949  
13,1,1671.666667  
13,1,19065.096774  
13,1,1954.486842  
13,1,1509.482955  
13,1,1533.235294  
13,1,12947.478261  
13,1,5772.116071  
13,1,8395.200658  
13,1,4678.215909  
13,1,10299.364583

13,1,7574.137500  
13,1,8173.090909  
13,1,2709.243902  
13,1,19446.548077  
13,1,6005.875000  
13,1,2059.750000  
13,1,2953.656250  
13,1,6243.579787  
13,1,5605.829268  
13,1,6098.176136  
13,1,6897.653226  
13,1,2375.808594  
13,1,12742.267361  
13,1,6183.469945  
13,1,14370.250000  
13,1,10580.772727  
13,1,4214.485119  
13,1,1901.784091  
13,1,12416.956731  
13,1,1609.691860  
13,1,4561.534722  
13,1,6054.965625  
13,1,3404.743421  
13,1,15441.679688  
13,1,7285.801471  
13,1,2495.708333  
13,1,6118.880952  
13,1,5479.880682  
13,1,1723.343750  
13,1,7950.689655  
13,1,1513.619318  
13,1,11867.380435  
13,1,1928.909091  
13,1,1689.194079  
13,1,2734.906250  
13,1,1687.725543  
13,1,1870.125000  
13,1,2733.272727  
13,1,2149.337500  
13,1,13064.358025  
13,1,9313.416667  
13,1,2411.099265  
13,1,4544.200980  
13,1,2750.035156  
13,1,8777.856618  
13,1,3188.356707  
13,1,2859.257812  
13,1,7553.453125  
13,1,13008.125000  
13,1,4355.959239  
13,1,12499.432692  
13,1,6132.253049  
13,1,12308.027439  
13,1,6257.852941  
13,1,9459.619048  
13,1,6885.187500  
13,1,5974.000000  
13,1,3539.214674  
13,1,16911.947917  
13,1,1902.421053  
13,1,4540.781250  
13,1,2721.513889  
13,1,11195.887500  
13,1,10461.691667  
13,1,3880.141304  
13,1,2125.816489

13,1,3596.000000  
13,1,5273.146875  
13,1,1778.268293  
13,1,2462.128472  
13,1,1836.864583  
13,1,2120.365385  
13,1,12603.782407  
13,1,14018.071023  
13,1,2871.823529  
13,1,8956.392857  
13,1,5127.461538  
13,1,4454.073529  
13,1,10835.971154  
13,1,2322.802083  
13,1,4267.709677  
13,1,3729.692308  
13,1,1688.662500  
13,1,6309.250000  
13,1,2241.166667  
13,1,1802.386792  
13,1,5074.113889  
13,1,9675.477941  
13,1,1721.099359  
13,1,14069.838816  
13,1,3284.062500  
13,1,2129.682692  
13,1,1875.946875  
13,1,2898.289474  
13,1,1935.970588  
13,1,1961.740385  
13,1,10187.273437  
13,1,4438.361111  
13,1,4433.197917  
13,1,6204.682143  
13,1,3294.812500  
13,1,2255.650000  
13,1,1560.206250  
13,1,7531.703125  
13,1,4386.987805  
13,1,3779.259615  
13,1,1956.089286  
13,1,2263.613065  
13,1,2521.402344  
13,1,12577.935897  
13,1,2866.205128  
13,1,4046.052632  
13,1,3121.805556  
13,1,1748.093750  
13,1,7061.708333  
13,1,3158.805195  
13,1,5432.500000  
13,1,2571.914634  
13,1,4554.000000  
13,1,5272.350000  
13,1,6210.298780  
13,1,2991.853659  
13,1,3916.992188  
13,1,6693.279070  
13,1,3167.067308  
13,1,4801.772059  
13,1,1682.176471  
13,1,3270.187500  
13,1,3369.780488  
13,1,2163.807692  
13,1,1538.105263  
13,1,1528.100000

13,1,9219.375000  
13,1,2463.400000  
13,1,2051.375000  
13,1,1604.000000  
13,1,2678.589286  
13,1,10295.989286  
13,1,1977.391447  
13,1,2925.363636  
13,1,4364.705882  
13,1,2821.319149  
13,1,1663.767045  
13,1,2002.640000  
13,1,7915.253125  
13,1,4208.893617  
13,1,13038.095238  
13,1,3344.464286  
13,1,4174.058824  
13,1,6730.035714  
13,1,3134.909091  
13,1,19698.769737  
13,1,3591.303571  
13,1,9300.538265  
13,1,4523.871212  
13,1,4600.066176  
13,1,4390.104167  
13,1,3464.914634  
13,1,1597.257143  
13,1,8997.562500  
13,1,1932.039634  
13,1,1562.243056  
13,1,12400.919643  
13,1,5263.761905  
13,1,4166.517857  
13,1,15667.138158  
13,1,2735.350000  
13,1,16515.875000  
13,1,2984.699324  
13,1,5341.342593  
13,1,2149.196875  
13,1,2464.102941  
13,1,10571.825000  
13,1,8001.146739  
13,1,6812.432432  
13,1,2703.670732  
13,1,1516.600000  
13,1,2053.542683  
13,1,10811.020833  
13,1,4148.453125  
13,1,15392.950000  
13,1,7255.928030  
13,1,2281.088710  
13,1,4003.441176  
13,1,1663.985294  
13,1,4813.750000  
13,1,5373.346154  
13,1,3421.661765  
13,1,1844.743056  
13,1,1917.380556  
13,1,5732.723684  
13,1,4149.103125  
13,1,12540.914634  
13,1,2065.108696  
13,1,9893.047619  
13,1,4742.348684  
13,1,3900.802521  
13,1,1664.230769

13,1,2206.897059  
13,1,9291.312500  
13,1,1871.744318  
13,1,2334.666667  
13,1,1916.789773  
13,1,1609.864865  
13,1,7775.802632  
13,1,12518.214286  
13,1,3257.725610  
13,1,5406.500000  
13,1,3372.993750  
13,1,1504.593750  
13,1,19639.932927  
13,1,4655.127660  
13,1,1808.714286  
13,1,17274.897059  
13,1,2846.714286  
13,1,1617.465116  
13,1,1962.668269  
13,1,3007.913043  
13,1,7901.701220  
13,1,2177.378289  
13,1,5706.364286  
13,1,1566.538462  
13,1,5253.266667  
13,1,13560.460938  
13,1,8295.643750  
13,1,3465.575758  
13,1,6053.125000  
13,1,3309.538194  
13,1,1611.661290  
13,1,1690.217262  
13,1,4093.000000  
13,1,2909.750000  
13,1,2527.367647  
13,1,1769.119565  
13,1,1540.590909  
13,1,1761.058824  
13,1,4451.023438  
13,1,1769.179878  
13,1,1828.994565  
13,1,1944.317935  
13,1,2641.494186  
13,1,4953.928571  
13,1,8846.697674  
13,1,1845.261905  
13,1,7357.340909  
13,1,4268.952381  
13,1,2595.028125  
13,1,2709.195312  
13,1,3656.560976  
13,1,1556.653846  
13,1,8786.659091  
13,1,2849.388587  
13,1,2409.671875  
13,1,1520.157895  
13,1,1560.336957  
13,1,6522.709559  
13,1,1941.419118  
13,1,7282.480769  
13,1,14064.025000  
13,1,3618.893617  
13,1,1919.984756  
13,1,9012.500000  
13,1,2626.533784  
13,1,2707.044355

13,1,2516.714286  
13,1,2519.575000  
13,1,2528.625000  
13,1,12994.500000  
13,1,1582.319853  
13,1,2431.840909  
13,1,3138.040541  
13,1,3074.575658  
13,1,5306.972973  
13,1,1582.766447  
13,1,19841.398437  
13,1,2788.734375  
13,1,3021.211538  
13,1,4100.325000  
13,1,5260.741071  
13,1,1978.306548  
13,1,4384.855263  
13,1,3313.500000  
13,1,3355.428571  
13,1,1991.833333  
13,1,4649.576923  
13,1,2793.514286  
13,1,1776.803030  
13,1,2798.100806  
13,1,14174.133929  
13,1,3968.915323  
13,1,2289.625000  
13,1,2141.616071  
13,1,6182.000000  
13,1,1765.318750  
13,1,1834.358974  
13,1,5243.196429  
13,1,2787.133333  
13,1,2594.443966  
13,1,1708.468085  
13,1,8637.000000  
13,1,9125.125000  
13,1,1935.573718  
13,1,10767.436047  
13,1,1598.375000  
13,1,1919.625000  
13,1,1658.538462  
13,1,13741.390625  
13,1,1761.145833  
13,1,8156.750000  
13,1,6012.181250  
13,1,2592.636364  
13,1,2918.128205  
13,1,1908.926829  
13,1,5981.479167  
13,1,2065.187500  
13,1,19712.869565  
13,1,1577.588889  
13,1,4447.375000  
13,1,2344.718750  
13,1,1727.616667  
13,1,3107.655405  
13,1,2695.151515  
13,1,1714.437500  
13,1,1572.737179  
13,1,3481.455882  
13,1,2628.929487  
13,1,14799.282738  
13,1,4004.216216  
13,1,1562.340426  
13,1,4019.857143

13,1,1950.288889  
13,1,2439.187500  
13,1,3871.304348  
13,1,1667.500000  
13,1,1874.700000  
13,1,1947.455882  
13,1,10220.263889  
13,1,5245.653846  
13,1,2847.450000  
13,1,10159.833333  
13,1,6792.308824  
13,1,10434.437500  
13,1,6650.557143  
13,1,5220.300000  
13,1,11059.892241  
13,1,10161.176282  
13,1,3981.200000  
13,1,18139.262195  
13,1,7090.545455  
13,1,2711.441176  
13,1,2100.806818  
13,1,15641.790541  
13,1,1821.242647  
13,1,3015.945513  
13,1,5047.250000  
13,1,1766.229167  
13,1,3113.312500  
13,1,3088.909091  
13,1,2251.809211  
13,1,4972.937500  
13,1,2558.379032  
13,1,7212.399194  
13,1,5988.786765  
13,1,2385.000000  
13,1,2750.054054  
13,1,3736.750000  
13,1,2475.802885  
13,1,2554.804878  
13,1,5862.812500  
13,1,3015.719697  
13,1,1732.353659  
13,1,3532.630952  
13,1,17124.226190  
13,1,4657.162791  
13,1,2981.165625  
13,1,3985.419118  
13,1,6912.202128  
13,1,8614.344697  
13,1,2616.891667  
13,1,8009.140625  
13,1,10487.172727  
13,1,6537.476190  
13,1,1562.125000  
13,1,3449.957317  
13,1,1780.308333  
13,1,11213.312500  
13,1,2227.159091  
13,1,2960.414063  
13,1,3123.193182  
13,1,2350.925781  
13,1,2870.000000  
13,1,1679.217105  
13,1,7897.470588  
13,1,2009.797500  
13,1,1945.724359  
13,1,3164.786184

13,1,9386.980769  
13,1,2545.356618  
13,1,5544.945946  
13,1,3249.056548  
13,1,8047.362805  
13,1,2012.643382  
13,1,2465.181818  
13,1,2723.289062  
13,1,3680.858333  
13,1,6907.868421  
13,1,2643.173780  
13,1,9168.980769  
13,1,4751.969388  
13,1,5301.194444  
13,1,3627.757143  
13,1,3822.125000  
13,1,11127.902778  
13,1,6065.883721  
13,1,1580.833333  
13,1,4409.875000  
13,1,1806.208333  
13,1,2965.707317  
13,1,8031.633721  
13,1,3324.511905  
13,1,3774.695122  
13,1,3440.432692  
13,1,11270.285714  
13,1,4030.862500  
13,1,2293.976562  
13,1,6385.718750  
13,1,19624.666667  
13,1,5196.047414  
13,1,1763.184783  
13,1,1709.862179  
13,1,3615.811111  
13,1,7311.714286  
13,1,2574.473958  
13,1,1797.651163  
13,1,5144.690217  
13,1,10490.050314  
13,1,1629.310976  
13,1,15402.825000  
13,1,5705.393617  
13,1,5882.500000  
13,1,4599.131579  
13,1,2864.368590  
13,1,10585.047794  
13,1,1650.500000  
13,1,9919.968750  
13,1,2639.000000  
13,1,3357.350000  
13,1,1782.265625  
13,1,3548.939189  
13,1,3313.634146  
13,1,2126.829268  
13,1,1986.833333  
13,1,2126.617021  
13,1,2858.972973  
13,1,2075.000000  
13,1,3040.619565  
13,1,12830.372340  
13,1,6240.707317  
13,1,2086.785156  
13,1,4777.101562  
13,1,5203.285714  
13,1,8833.900000

13,1,7538.593750  
13,1,1507.358696  
13,1,13553.921875  
13,1,2048.128205  
13,1,4865.615385  
13,1,4150.020408  
13,1,8364.909091  
13,1,4526.153846  
13,1,10306.400000  
13,1,2715.206250  
13,1,2093.929688  
13,1,3533.493750  
13,1,16913.410256  
13,1,2791.375000  
13,1,4480.409091  
13,1,14017.687500  
13,1,7355.852273  
13,1,4033.250000  
13,1,2942.252976  
13,1,4596.000000  
13,1,1843.768293  
13,1,8110.281977  
13,1,16065.875000  
13,1,3152.071429  
13,1,1519.650000  
13,1,3082.078125  
13,1,10552.281915  
13,1,6367.409091  
13,1,7207.106618  
13,1,2158.333333  
13,1,2665.508333  
13,1,2619.244186  
13,1,1572.347561  
13,1,2279.117021  
13,1,3218.402778  
13,1,2218.841912  
13,1,5504.261364  
13,1,3029.692308  
13,1,3480.763158  
13,1,19487.384615  
13,1,1586.062500  
13,1,3559.404070  
13,1,2473.863372  
13,1,12877.328125  
13,1,5823.621429  
13,1,17642.588235  
13,1,10604.234848  
13,1,1567.125000  
13,1,9117.864865  
13,1,15500.425781  
13,1,1615.219512  
13,1,2410.875000  
13,1,4256.897059  
13,1,1809.641026  
13,1,2264.937500  
13,1,3429.686275  
13,1,2105.150000  
13,1,3530.227500  
13,1,15153.338235  
13,1,2656.394737  
13,1,7155.208333  
13,1,2354.875000  
13,1,1645.958333  
13,1,2599.377778  
13,1,5112.728571  
13,1,2609.092857

13,1,5859.750000  
13,1,1674.166667  
13,1,1713.510714  
13,1,2278.463816  
13,1,4827.750000  
13,1,1569.558594  
13,1,2500.606061  
13,1,2250.031250  
13,1,2536.158784  
13,1,4849.794872  
13,1,2734.265306  
13,1,1518.390625  
13,1,2730.233333  
13,1,7386.367647  
13,1,7304.458333  
13,1,6448.090909  
13,1,3230.807692  
13,1,1675.208333  
13,1,3546.305147  
13,1,1875.095238  
13,1,1663.747159  
13,1,1856.704545  
13,1,1754.297619  
13,1,2141.286765  
13,1,2667.545455  
13,1,6298.846154  
13,1,9947.775000  
13,1,10221.944444  
13,1,5022.302632  
13,1,15423.946429  
13,1,18391.867925  
13,1,7386.750000  
13,1,9415.268293  
13,1,7853.000000  
13,1,7089.524390  
13,1,8925.410256  
13,1,1713.135135  
13,1,2654.241379  
13,1,1656.792763  
13,1,4287.925926  
13,1,16389.687500  
13,1,1907.050000  
13,1,2259.297872  
13,1,9744.727273  
13,1,2059.687500  
13,1,2007.430556  
13,1,1692.656977  
13,1,3186.203125  
13,1,3066.347826  
13,1,4451.464286  
13,1,4969.742857  
13,1,3615.538462  
13,1,3709.045213  
13,1,8346.310976  
13,1,3608.000000  
13,1,2854.937500  
13,1,1975.382812  
13,1,6156.588235  
13,1,6153.916667  
13,1,1807.015244  
13,1,2081.872340  
13,1,2465.975000  
13,1,1569.127907  
13,1,7506.500000  
13,1,19559.406250  
13,1,1781.316860

13,1,9702.392857  
13,1,2669.465116  
13,1,2275.142857  
13,1,2121.810811  
13,1,1649.185811  
13,1,1577.372093  
13,1,2059.022727  
13,1,1816.375000  
13,1,8703.169355  
13,1,2805.868750  
13,1,2554.521277  
13,1,8988.406250  
13,1,2566.909091  
13,1,1509.110577  
13,1,1682.022727  
13,1,1826.017442  
13,1,2037.358696  
13,1,5890.435000  
13,1,3416.247549  
13,1,3196.711957  
13,1,1995.256098  
13,1,2760.979592  
13,1,4135.237245  
13,1,5860.716667  
13,1,3200.082386  
13,1,13708.335938  
13,1,2111.746324  
13,1,1504.672794  
13,1,7462.904762  
13,1,1813.312500  
13,1,1580.762195  
13,1,2435.887500  
13,1,4157.991279  
13,1,3068.295455  
13,1,6635.694767  
13,1,2069.625000  
13,1,2520.500000  
13,1,9189.504717  
13,1,4542.486486  
13,1,9280.952703  
13,1,9978.473958  
13,1,2524.798077  
13,1,3268.976744  
13,1,2982.553030  
13,1,7667.612245  
13,1,4413.279412  
13,1,5016.928571  
13,1,4834.492925  
13,1,2415.333333  
13,1,13091.959677  
13,1,4046.648256  
13,1,11769.364130  
13,1,15564.323529  
13,1,2134.243590  
13,1,1679.489796  
13,1,3060.750000  
13,1,3175.761905  
13,1,2140.652439  
13,1,7482.386719  
13,1,3787.825581  
13,1,9786.875000  
13,1,1758.031250  
13,1,1501.392442  
13,1,4251.671875  
13,1,1740.051282  
13,1,2289.583333

13,1,7966.547619  
13,1,4254.484848  
13,1,2360.625000  
13,1,16310.026042  
13,1,1833.475806  
13,1,2676.800000  
13,1,13367.211806  
13,1,6654.937500  
13,1,2926.334559  
13,1,1504.625000  
13,1,3444.108696  
13,1,2010.973684  
13,1,2207.046875  
13,1,1526.142857  
13,1,1717.039773  
13,1,10609.815000  
13,1,1943.447368  
13,1,2907.958333  
13,1,1737.571429  
13,1,3200.808594  
13,1,3667.988636  
13,1,14427.475962  
13,1,1697.208029  
13,1,11629.789286  
13,1,1663.360849  
13,1,2283.744186  
13,1,11491.769737  
13,1,3342.993243  
13,1,6734.938830  
13,1,3366.581250  
13,1,3706.111111  
13,1,2340.605000  
13,1,1513.938312  
13,1,4509.267442  
13,1,3283.234375  
13,1,12887.900424  
13,1,5558.052632  
13,1,2481.150568  
13,1,2361.265625  
13,1,5136.627907  
13,1,2327.179054  
13,1,1704.408088  
13,1,5580.515625  
13,1,3008.005556  
13,1,2435.181818  
13,1,3174.128378  
13,1,4586.102564  
13,1,8304.250000  
13,1,3397.176724  
13,1,4053.799419  
13,1,1594.846154  
13,1,5799.986842  
13,1,11583.664474  
13,1,2199.397436  
13,1,5790.477273  
13,1,3221.031250  
13,1,2386.658537  
13,1,14691.386905  
13,1,2058.765625  
13,1,3092.445946  
13,1,1901.513514  
13,1,2596.125000  
13,1,5904.809524  
13,1,15206.201087  
13,1,5521.576705  
13,1,7199.051282

13,1,14968.834459  
13,1,2081.487805  
13,1,1824.602564  
13,1,2458.063953  
13,1,1518.464286  
13,1,5625.206250  
13,1,3584.494565  
13,1,1934.948370  
13,1,7799.942308  
13,1,2321.750000  
13,1,14796.500000  
13,1,4442.870370  
13,1,4331.312500  
13,1,1735.776786  
13,1,2960.324468  
13,1,1972.000000  
13,1,1566.596154  
13,1,3779.500000  
13,1,10391.875000  
13,1,12626.062500  
13,1,13824.052632  
13,1,1785.125000  
13,1,10239.796875  
13,1,1721.272727  
13,1,2296.081633  
13,1,6474.177885  
13,1,4278.214286  
13,1,1800.195652  
13,1,6516.127551  
13,1,1933.000000  
13,1,1998.092593  
13,1,2071.024390  
13,1,4088.375000  
13,1,2572.279412  
13,1,6188.841837  
13,1,3795.800000  
13,1,1733.586538  
13,1,14137.368750  
13,1,3676.357143  
13,1,6898.677419  
13,1,3415.514706  
13,1,4471.720930  
13,1,3117.062500  
13,1,2035.316489  
13,1,4915.781250  
13,1,5505.000000  
13,1,7491.823529  
13,1,4618.441176  
13,1,12534.396429  
13,1,2133.500000  
13,1,1703.900862  
13,1,1708.914286  
13,1,2474.078947  
13,1,2390.432065  
13,1,1722.712963  
13,1,8617.875000  
13,1,1921.690476  
13,1,3887.587500  
13,1,1999.909091  
13,1,2489.955645  
13,1,2610.467391  
13,1,3579.552778  
13,1,9232.544118  
13,1,11307.612805  
13,1,6423.502778  
13,1,2719.750000

13,1,9107.728125  
13,1,7514.632500  
13,1,3634.512500  
13,1,15484.641026  
13,1,10011.960000  
13,1,1687.927632  
13,1,2420.521277  
13,1,8022.671053  
13,1,1868.000000  
13,1,2455.913043  
13,1,4858.112500  
13,1,1552.345238  
13,1,1578.901163  
13,1,4504.178571  
13,1,3917.500000  
13,1,4082.750000  
13,1,3144.307692  
13,1,3257.162500  
13,1,3196.720930  
13,1,9571.089674  
13,1,1809.218750  
13,1,1615.489362  
13,1,5468.642857  
13,1,5241.000000  
13,1,8434.617188  
13,1,4518.308511  
13,1,8041.219595  
13,1,1745.308511  
13,1,10390.744186  
13,1,10903.401316  
13,1,3394.375000  
13,1,8825.650000  
13,1,2036.668269  
13,1,2252.095588  
13,1,5758.410256  
13,1,6884.750000  
13,1,1792.500000  
13,1,1572.258152  
13,1,2328.684211  
13,1,3062.203125  
13,1,12208.901316  
13,1,3613.173077  
13,1,2131.729730  
13,1,2152.529605  
13,1,2185.666667  
13,1,3531.577381  
13,1,4842.764706  
13,1,3245.589674  
13,1,1763.456395  
13,1,1831.806452  
13,1,3161.875000  
13,1,2945.853659  
13,1,2265.341912  
13,1,6760.175000  
13,1,3282.429167  
13,1,2568.968085  
13,1,7052.428571  
13,1,7396.572222  
13,1,6277.318182  
13,1,8214.180556  
13,1,3128.964286  
13,1,3251.816176  
13,1,4387.388514  
13,1,6224.385204  
13,1,14508.464286  
13,1,7356.625000

13,1,1535.466912  
13,1,8483.250000  
13,1,1879.585106  
13,1,16628.183673  
13,1,10889.398936  
13,1,4925.562500  
13,1,3170.963235  
13,1,4600.540323  
13,1,6313.884615  
13,1,6224.177083  
13,1,2942.931452  
13,1,1598.843085  
13,1,3052.567568  
13,1,3304.976974  
13,1,5879.510000  
13,1,2312.859375  
13,1,1573.096154  
13,1,12244.375000  
13,1,3243.220395  
13,1,7536.706250  
13,1,4739.684211  
13,1,1684.335938  
13,1,5924.056250  
13,1,10466.229730  
13,1,4012.698529  
13,1,4082.990132  
13,1,4275.275000  
13,1,14388.678571  
13,1,10473.583333  
13,1,1859.416667  
13,1,7216.534091  
13,1,1978.861702  
13,1,7885.007143  
13,1,2510.806818  
13,1,3389.229730  
13,1,1940.193750  
13,1,19364.823529  
13,1,1781.625000  
13,1,5772.786765  
13,1,1703.545455  
13,1,18358.000000  
13,1,2058.683140  
13,1,1958.750000  
13,1,12919.781250  
13,1,6485.453125  
13,1,3611.312500  
13,1,1802.019022  
13,1,2113.214286  
13,1,2761.404762  
13,1,12016.125000  
13,1,1508.156250  
13,1,5367.851351  
13,1,7925.544118  
13,1,2978.551630  
13,1,1975.083333  
13,1,3018.000000  
13,1,3868.925000  
13,1,3697.816667  
13,1,1996.887500  
13,1,8286.950000  
13,1,1881.357143  
13,1,2346.728261  
13,1,1763.182927  
13,1,2016.527778  
13,1,4165.711538  
13,1,5478.294118

13,1,4279.627907  
13,1,10276.464674  
13,1,4011.201923  
13,1,10443.175532  
13,1,6811.166667  
13,1,1665.166667  
13,1,1638.236111  
13,1,1613.300000  
13,1,2287.250000  
13,1,2391.532609  
13,1,11574.333333  
13,1,1571.562500  
13,1,3207.250000  
13,1,5070.352941  
13,1,12262.722222  
13,1,1503.903302  
13,1,2774.541667  
13,1,6085.015000  
13,1,1909.593750  
13,1,7493.754717  
13,1,2057.162162  
13,1,2392.000000  
13,1,2879.190217  
13,1,3250.921053  
13,1,6160.390957  
13,1,4776.182500  
13,1,3721.711538  
13,1,2514.365854  
13,1,3962.576923  
13,1,2948.671875  
13,1,12576.212500  
13,1,2256.663194  
13,1,1688.363636  
13,1,9211.300000  
13,1,8014.850000  
13,1,8049.168750  
13,1,4402.190789  
13,1,17854.805233  
13,1,2843.538462  
13,1,4452.169118  
13,1,2690.432692  
13,1,11274.822368  
13,1,2771.871711  
13,1,6656.394444  
13,1,5229.371711  
13,1,4980.857143  
13,1,1538.086957  
13,1,2824.333333  
13,1,6946.000000  
13,1,2381.163690  
13,1,18912.967742  
13,1,1675.036458  
13,1,1571.779412  
13,1,16704.993590  
13,1,1872.730769  
13,1,1990.763889  
13,1,2226.125000  
13,1,2761.923077  
13,1,2052.966667  
13,1,15978.954545  
13,1,1845.156250  
13,1,10994.971154  
13,1,2715.255435  
13,1,8394.457317  
13,1,1556.091667  
13,1,2106.019737

13,1,16883.148438  
13,1,2416.041667  
13,1,1551.097561  
13,1,3821.405000  
13,1,3921.097561  
13,1,1706.912791  
13,1,6680.831731  
13,1,1524.178977  
13,1,7778.720395  
13,1,4062.935606  
13,1,2817.246951  
13,1,6467.528846  
13,1,4082.975000  
13,1,11796.086957  
13,1,3756.546512  
13,1,5027.000000  
13,1,13507.933333  
13,1,7435.967742  
13,1,2317.981771  
13,1,1851.352941  
13,1,2961.650000  
13,1,12627.119565  
13,1,3514.269231  
13,1,3178.220930  
13,1,10006.882353  
13,1,1768.767857  
13,1,5405.931818  
13,1,2469.308824  
13,1,1917.083333  
13,1,5963.618421  
13,1,2114.821429  
13,1,7874.176136  
13,1,11229.912162  
13,1,1912.371429  
13,1,1663.515244  
13,1,7964.059375  
13,1,5694.200893  
13,1,4709.237805  
13,1,1821.666667  
13,1,3393.095000  
13,1,10586.278571  
13,1,2533.206522  
13,1,8246.886364  
13,1,5253.828125  
13,1,2023.312500  
13,1,3815.000000  
14,2,1551.740566  
14,2,1563.263889  
14,2,2263.175000  
14,2,5718.800926  
14,2,8417.250000  
14,2,2234.659091  
14,2,3326.000000  
14,2,1692.587500  
14,2,2068.416667  
14,2,2518.505814  
14,2,7986.112245  
14,2,3583.021739  
14,2,1584.996951  
14,2,2612.225000  
14,2,1762.890000  
14,2,2340.767857  
14,2,2020.941964  
14,2,3380.054348  
14,2,2231.983553  
14,2,2741.468750

14,2,3223.545000  
14,2,1642.926471  
14,2,1679.587766  
14,2,1869.537162  
14,2,4129.222222  
14,2,6150.025862  
14,2,1696.772727  
14,2,2738.882812  
14,2,8436.497283  
14,2,1894.750000  
14,2,1791.973404  
14,2,1605.700000  
14,2,1859.445122  
14,2,2173.669643  
14,2,2806.090426  
14,2,2176.552326  
14,2,1529.195000  
14,2,2640.053030  
14,2,1628.574074  
14,2,14780.903846  
14,2,4145.625000  
14,2,2913.805556  
14,2,2016.015625  
14,2,1610.753676  
14,2,1637.273585  
14,2,1988.812500  
14,2,5870.135000  
14,2,1833.867925  
14,2,2453.760870  
14,2,1656.419643  
14,2,2081.482394  
14,2,1644.448980  
14,2,2014.770349  
14,2,2653.190217  
14,2,1980.264423  
14,2,1523.260417  
14,2,2642.735465  
14,2,1528.416667  
14,2,4246.597222  
14,2,10054.296875  
14,2,1639.516304  
14,2,1543.947917  
14,2,4547.732639  
14,2,8150.320000  
14,2,2273.896277  
14,2,2597.347826  
14,2,5415.610294  
14,2,7105.531250  
14,2,2311.479730  
14,2,2278.852941  
14,2,2023.337719  
14,2,3429.173295  
14,2,1714.338542  
14,2,2308.190476  
14,2,2376.308140  
14,2,1822.567935  
14,2,1599.688830  
14,2,7561.239583  
14,2,2852.718750  
14,2,1737.406250  
14,2,1500.500000  
14,2,1638.205882  
14,2,1648.533784  
14,2,1642.078125  
14,2,4490.385638  
14,2,1683.316327

14,2,5978.441176  
14,2,1514.066667  
14,2,1595.781250  
14,2,10611.243243  
14,2,3818.201754  
14,2,2999.018182  
14,2,1587.446429  
14,2,5214.057927  
14,2,2405.235294  
14,2,1908.273256  
14,2,1958.031915  
14,2,1760.545455  
14,2,2195.390957  
14,2,4277.252315  
14,2,1594.339286  
14,2,5266.711538  
14,2,1752.299528  
14,2,2117.659091  
14,2,1505.861702  
14,2,1654.191406  
14,2,2304.657895  
14,2,2163.510135  
14,2,1989.682927  
14,2,5088.884615  
14,2,2687.559211  
14,2,1539.527273  
14,2,1753.430288  
14,2,2568.399038  
14,2,1583.000000  
14,2,2172.081250  
14,2,3845.972222  
14,2,1744.500000  
14,2,2257.507979  
14,2,3380.767857  
14,2,2653.075000  
14,2,1645.677419  
14,2,1970.350000  
14,2,3243.000000  
14,2,2405.617500  
14,2,2079.565217  
14,2,15053.650000  
14,2,1582.244681  
14,2,1670.031250  
14,2,1566.089820  
14,2,1527.818182  
14,2,1653.844512  
14,2,3176.188953  
14,2,2900.944444  
14,2,1846.362805  
14,2,1604.072368  
14,2,4421.520833  
14,2,2139.285714  
14,2,1864.036111  
14,2,1715.980769  
14,2,2935.292683  
14,2,1500.163194  
14,2,6365.900000  
14,2,2144.292453  
14,2,1579.657407  
14,2,1577.730769  
14,2,2533.546875  
14,2,1994.791667  
14,2,1770.656250  
14,2,2652.487805  
14,2,1509.782051  
14,2,1739.802326

14,2,1860.155000  
14,2,2265.046875  
14,2,1730.826923  
14,2,1960.688995  
14,2,1985.728723  
14,2,2173.628049  
14,2,2532.245098  
14,2,2836.819149  
14,2,3147.782895  
14,2,3092.793956  
14,2,1675.912500  
14,2,2250.300000  
14,2,1534.000000  
14,2,8719.803571  
14,2,2034.500000  
14,2,2485.377551  
14,2,1829.025641  
14,2,2705.142857  
14,2,2087.966667  
14,2,1519.522959  
14,2,1755.687500  
14,2,2590.296296  
14,2,1509.250000  
14,2,1856.326705  
14,2,2832.353125  
14,2,1782.729167  
14,2,2895.735577  
14,2,1563.807692  
14,2,18764.800000  
14,2,1782.190476  
14,2,2563.106481  
14,2,2205.615385  
14,2,1557.726563  
14,2,2372.837838  
14,2,2671.221154  
14,2,2757.238372  
14,2,11153.864130  
14,2,3495.360465  
14,2,9136.243750  
14,2,1917.700000  
14,2,2049.461207  
14,2,2964.514151  
14,2,1824.538462  
14,2,3673.547872  
14,2,1753.880000  
14,2,2281.226562  
14,2,4022.036765  
14,2,1715.291667  
14,2,6592.656977  
14,2,2076.185185  
14,2,1559.622093  
14,2,2699.087500  
14,2,3022.368243  
14,2,1522.312500  
14,2,2148.883721  
14,2,1768.868590  
14,2,1569.211207  
14,2,5051.823529  
14,2,2047.437500  
14,2,7188.806604  
14,2,3210.218750  
14,2,1621.312500  
14,2,1585.938776  
14,2,3101.542553  
14,2,1638.766667  
14,2,1662.000000

14,2,1567.563830  
14,2,2980.927966  
14,2,1562.000000  
14,2,3259.808673  
14,2,2983.170732  
14,2,2050.940341  
14,2,1684.463816  
14,2,2039.710106  
14,2,2478.977273  
14,2,1706.320000  
14,2,1715.930556  
14,2,1647.683824  
14,2,1782.225806  
14,2,1530.981250  
14,2,1951.391667  
14,2,1630.061111  
14,2,2571.328947  
14,2,1580.437500  
14,2,2981.925926  
14,2,2211.500000  
14,2,1698.360000  
14,2,1533.023923  
14,2,1917.333333  
14,2,1549.086957  
14,2,1952.656250  
14,2,1746.720238  
14,2,1510.791667  
14,2,1841.068182  
14,2,2730.750000  
14,2,9441.975000  
14,2,2295.775000  
14,2,2267.095238  
14,2,2669.140909  
14,2,14530.625000  
14,2,5401.897959  
14,2,1747.606818  
14,2,1767.010000  
14,2,2022.713889  
14,2,1607.000000  
14,2,3270.588889  
14,2,3489.387255  
14,2,2138.432292  
14,2,2791.920213  
14,2,1951.578704  
14,2,5259.426887  
14,2,3749.937500  
14,2,2534.081395  
14,2,2055.404762  
14,2,3412.476974  
14,2,6092.201923  
14,2,1617.409884  
14,2,5075.352041  
14,2,3066.812500  
14,2,5588.989583  
14,2,1588.014151  
14,2,2814.905830  
14,2,1500.633152  
14,2,1535.925532  
14,2,1803.974265  
14,2,1917.197222  
14,2,1709.808824  
14,2,1814.793750  
14,2,1950.434783  
14,2,1760.716216  
14,2,1549.414634  
14,2,9853.853659

14,2,1499.719388  
14,2,2267.555556  
14,2,1817.957447  
14,2,1979.846939  
14,2,1533.596774  
14,2,3194.468085  
14,2,3659.520349  
14,2,1509.832335  
14,2,1568.696809  
14,2,2262.513514  
14,2,1790.872727  
14,2,1773.692308  
14,2,3098.565217  
14,2,1747.986702  
14,2,1869.639535  
14,2,2222.787234  
14,2,7489.866477  
14,2,1844.778302  
14,2,1527.978125  
14,2,2025.421512  
14,2,7397.813953  
14,2,2410.851064  
14,2,1937.320000  
14,2,2708.160000  
14,2,1789.845238  
14,2,2917.310000  
14,2,2473.466346  
14,2,2957.109375  
14,2,1838.833333  
14,2,2766.356383  
14,2,6118.038462  
14,2,1547.524390  
14,2,5550.253788  
14,2,2676.093750  
14,2,3181.903846  
14,2,2494.250000  
14,2,1774.216146  
14,2,2542.505319  
14,2,2332.585106  
14,2,1780.631250  
14,2,3620.576923  
14,2,2236.505000  
14,2,2754.089912  
14,2,3704.095745  
14,2,1641.077703  
14,2,1802.647059  
14,2,1717.939655  
14,2,3645.615385  
14,2,7820.625000  
14,2,4725.851064  
14,2,2365.469512  
14,2,2540.519231  
14,2,1569.838542  
14,2,6017.761905  
14,2,4752.675532  
14,2,1735.299419  
14,2,5645.404412  
14,2,3806.718085  
14,2,2899.020408  
14,2,5214.035000  
14,2,1531.487245  
14,2,1507.445000  
14,2,4306.354167  
14,2,2788.281250  
14,2,1805.711538  
14,2,1504.580000

14,2,2033.464744  
14,2,5486.197222  
14,2,1746.684375  
14,2,2926.441176  
14,2,5101.518229  
14,2,4485.900568  
14,2,1689.921429  
14,2,1663.457386  
14,2,2231.861702  
14,2,18639.678571  
14,2,4144.288462  
14,2,2158.470930  
14,2,1939.161111  
14,2,1651.628378  
14,2,2210.265625  
14,2,1555.010417  
14,2,1730.083333  
14,2,1654.209559  
14,2,1718.680233  
14,2,2093.250000  
14,2,2512.910714  
14,2,1647.760204  
14,2,1592.875000  
14,2,10020.034483  
14,2,3034.812500  
14,2,2577.414634  
14,2,2418.359694  
14,2,2649.013889  
14,2,7847.686275  
14,2,1915.491279  
14,2,2319.205357  
14,2,2770.724490  
14,2,2135.905405  
14,2,2116.125000  
14,2,9848.000000  
14,2,2611.870968  
14,2,3557.279070  
14,2,1581.440476  
14,2,1858.759146  
14,2,3838.110000  
14,2,3462.105263  
14,2,1899.950000  
14,2,1799.588816  
14,2,3423.452128  
14,2,1770.825000  
14,2,1562.772727  
14,2,1634.894737  
14,2,2868.203125  
14,2,1790.218023  
14,2,1597.738095  
14,2,1529.535714  
14,2,1524.294643  
14,2,1894.828947  
14,2,6692.178571  
14,2,1980.615854  
14,2,2783.810606  
14,2,2572.673913  
14,2,2582.485294  
14,2,1701.366071  
14,2,6590.385417  
14,2,14704.543478  
14,2,2855.619048  
14,2,1860.031250  
14,2,1724.000000  
14,2,2902.063953  
14,2,2170.730000

14,2,2889.200000  
14,2,1981.648148  
14,2,1656.043478  
14,2,2725.909091  
14,2,5609.239130  
14,2,3026.479592  
14,2,2034.978723  
14,2,2665.704545  
14,2,2146.194767  
14,2,1578.878205  
14,2,1739.905405  
14,2,2118.717105  
14,2,1845.888158  
14,2,2500.508929  
14,2,1527.768617  
14,2,1567.554487  
14,2,1520.326389  
14,2,2075.750000  
14,2,1521.714744  
14,2,2752.180288  
14,2,1590.707143  
14,2,1847.446809  
14,2,2968.363208  
14,2,5680.041667  
14,2,3361.870968  
14,2,2295.208333  
14,2,1589.786585  
14,2,1734.606250  
14,2,6142.862245  
14,2,3919.064103  
14,2,1883.907609  
14,2,3373.406818  
14,2,2389.350000  
14,2,2303.530660  
14,2,1975.235294  
14,2,1548.558140  
14,2,2039.697917  
14,2,1757.294872  
14,2,2267.750000  
14,2,2835.345745  
14,2,2279.389535  
14,2,3009.856707  
14,2,1620.163265  
14,2,3943.053191  
14,2,6325.843750  
14,2,1785.638298  
14,2,1897.266304  
14,2,1864.756757  
14,2,2943.888298  
14,2,2614.444444  
14,2,2276.500000  
14,2,1826.586957  
14,2,1912.135135  
14,2,2396.787234  
14,2,1871.202586  
14,2,2071.703125  
14,2,1709.571429  
14,2,1506.755814  
14,2,2188.854730  
14,2,6836.125000  
14,2,3229.535714  
14,2,1786.453488  
14,2,1948.727500  
14,2,1659.673077  
14,2,2436.544118  
14,2,1708.640000

14,2,3894.454545  
14,2,1526.166667  
14,2,2553.470238  
14,2,2085.122549  
14,2,1527.953947  
14,2,2663.151786  
14,2,1525.916667  
14,2,1919.530488  
14,2,3356.947368  
14,2,2264.063725  
14,2,1615.764706  
14,2,2692.693627  
14,2,1818.375000  
14,2,1654.466346  
14,2,1727.908163  
14,2,3857.599057  
14,2,2725.232143  
14,2,1904.542553  
14,2,1553.195122  
14,2,1840.702128  
14,2,1688.250000  
14,2,1563.989865  
14,2,4014.525000  
14,2,1942.478723  
14,2,1950.172872  
14,2,1504.250000  
14,2,2474.758333  
14,2,1638.818182  
14,2,1556.743243  
14,2,1891.110119  
14,2,4291.291667  
14,2,2128.183824  
14,2,3181.945000  
14,2,1982.420918  
14,2,1842.798913  
14,2,2893.877155  
14,2,5788.897196  
14,2,13376.500000  
14,2,1686.691327  
14,2,8517.972222  
14,2,2214.195946  
14,2,2290.220930  
14,2,1893.069767  
14,2,3116.198864  
14,2,2015.370192  
14,2,2354.584906  
14,2,1798.674419  
14,2,3320.943966  
14,2,1553.238095  
14,2,1529.400000  
14,2,2246.272059  
14,2,2063.500000  
14,2,2567.681818  
14,2,2104.422222  
14,2,1810.800000  
14,2,1581.421053  
14,2,3625.600000  
14,2,2329.187500  
14,2,1690.386905  
14,2,1558.390625  
14,2,2686.991071  
14,2,2396.367347  
14,2,1581.418367  
14,2,2933.750000  
14,2,2648.128342  
14,2,1718.916667

14,2,5758.381818  
14,2,2825.540698  
14,2,2188.840625  
14,2,2489.721591  
14,2,3004.562500  
14,2,1621.020833  
14,2,1585.906250  
14,2,1582.604167  
14,2,3677.361842  
14,2,1885.212302  
14,2,1823.756098  
14,2,2740.222826  
14,2,3969.635204  
14,2,1656.107143  
14,2,3731.235294  
14,2,2825.142857  
14,2,2048.760417  
14,2,1834.809375  
14,2,2162.338068  
14,2,2094.500000  
14,2,1748.746875  
14,2,3663.750000  
14,2,2643.882500  
14,2,3653.437500  
14,2,3194.270000  
14,2,1991.108491  
14,2,1801.885638  
14,2,2274.964286  
14,2,1803.223684  
14,2,1995.593750  
14,2,1852.730000  
14,2,1631.437500  
14,2,3176.375000  
14,2,1663.886905  
14,2,9769.714286  
14,2,3329.677419  
14,2,1882.445755  
14,2,2863.192073  
14,2,1530.828488  
14,2,2279.061224  
14,2,1618.946809  
14,2,2007.620536  
14,2,2089.554688  
14,2,1894.791667  
14,2,1873.476744  
14,2,3242.475000  
14,2,1505.229167  
14,2,1624.979167  
14,2,1591.581081  
14,2,1603.500000  
14,2,1994.720930  
14,2,1562.596354  
14,2,2054.051282  
14,2,1578.734043  
14,2,1750.686364  
14,2,13730.727273  
14,2,1721.324324  
14,2,1559.164773  
14,2,1726.765714  
14,2,3649.556548  
14,2,1810.263158  
14,2,2136.692308  
14,2,3163.820000  
14,2,1980.380000  
14,2,3383.210714  
14,2,1817.244681

14,2,1512.372024  
14,2,1683.063725  
14,2,2087.070312  
14,2,2350.583333  
14,2,1863.304878  
14,2,1555.086538  
14,2,1662.446429  
14,2,2242.775862  
14,2,2344.395349  
14,2,1527.000000  
14,2,3651.437500  
14,2,1950.328125  
14,2,2709.000000  
14,2,1956.963235  
14,2,1581.940476  
14,2,1764.166667  
14,2,2292.205446  
14,2,2276.833333  
14,2,2036.576923  
14,2,1943.345395  
14,2,1708.204861  
14,2,2662.697917  
14,2,2921.883152  
14,2,2329.858333  
14,2,2658.697674  
14,2,1673.902439  
14,2,3368.664062  
14,2,2275.088942  
14,2,1974.369565  
14,2,1924.500000  
14,2,2025.785714  
14,2,1835.090278  
14,2,3310.829268  
14,2,1609.495098  
14,2,2538.548718  
14,2,4437.445652  
14,2,1623.773438  
14,2,1976.520000  
14,2,2389.018293  
14,2,3135.916667  
14,2,1693.827381  
14,2,2741.572581  
14,2,2089.138889  
14,2,1653.606383  
14,2,1858.291667  
14,2,1500.709302  
14,2,3060.508523  
14,2,2996.166667  
14,2,2728.880208  
14,2,9030.166667  
14,2,2060.404255  
14,2,2248.455729  
14,2,9044.312500  
14,2,2513.808511  
14,2,1567.961538  
14,2,1648.676829  
14,2,1855.510870  
14,2,2241.104167  
14,2,1542.039216  
14,2,1930.543103  
14,2,2144.036364  
14,2,5849.869681  
14,2,2706.179245  
14,2,1714.523437  
14,2,2614.308140  
14,2,4393.539474

14,2,2439.339286  
14,2,1663.072917  
14,2,1766.270833  
14,2,1570.644737  
14,2,1886.349490  
14,2,4210.783784  
14,2,1582.265306  
14,2,1521.122596  
14,2,1609.023810  
14,2,1847.252778  
14,2,1503.750000  
14,2,2708.194444  
14,2,1568.325000  
14,2,1600.125000  
14,2,1906.527778  
14,2,2703.286458  
14,2,2496.500000  
14,2,3056.012500  
14,2,1631.520270  
14,2,1644.559375  
14,2,3654.760417  
14,2,4531.523707  
14,2,2972.916667  
14,2,1569.106383  
14,2,2762.433673  
14,2,4306.836957  
14,2,2044.214286  
14,2,2645.007812  
14,2,1535.820312  
14,2,3297.312500  
14,2,1499.011364  
14,2,4061.256098  
14,2,1939.635000  
14,2,1509.072115  
14,2,3441.743304  
14,2,1734.411765  
14,2,2015.410714  
14,2,1546.664634  
14,2,2540.599338  
14,2,1969.000000  
14,2,1511.912500  
14,2,3098.132353  
14,2,4177.745098  
14,2,2787.755952  
14,2,3650.283333  
14,2,12386.000000  
14,2,1743.169118  
14,2,1754.972222  
14,2,5163.529412  
14,2,2060.291667  
14,2,5555.227273  
14,2,6460.739583  
14,2,1771.227041  
14,2,1958.317308  
14,2,1852.157895  
14,2,1659.227041  
14,2,1618.280405  
14,2,2961.319149  
14,2,11915.982843  
14,2,2014.388298  
14,2,1638.239130  
14,2,1578.548077  
14,2,1519.218750  
14,2,2727.162791  
14,2,1672.000000  
14,2,2769.375000

14,2,2155.625000  
14,2,3994.341463  
14,2,3118.167614  
14,2,2480.481481  
14,2,1512.333333  
14,2,5327.812500  
14,2,1861.115385  
14,2,2859.960227  
14,2,1572.625000  
14,2,1653.189815  
14,2,2549.468750  
14,2,2152.235294  
14,2,1802.051020  
14,2,3108.039216  
14,2,3253.747768  
14,2,2212.512195  
14,2,1873.720930  
14,2,2859.089744  
14,2,5004.200581  
14,2,2572.655556  
14,2,14120.473485  
14,2,2908.704787  
14,2,1837.135135  
14,2,1797.106061  
14,2,2463.870000  
14,2,1938.344262  
14,2,1838.875000  
14,2,2941.110000  
14,2,1579.444444  
14,2,2938.808511  
14,2,2463.260000  
14,2,2882.489865  
14,2,4491.185897  
14,2,2729.659091  
14,2,1507.056818  
14,2,3267.428571  
14,2,3239.687500  
14,2,1559.089623  
14,2,2405.960227  
14,2,1722.290323  
14,2,1978.960526  
14,2,1582.918478  
14,2,2319.638889  
14,2,1712.697917  
14,2,5014.727083  
14,2,2591.843750  
14,2,2325.689189  
14,2,1621.875000  
14,2,2296.872340  
14,2,2370.354167  
14,2,1887.088889  
14,2,2529.110294  
14,2,2099.063889  
14,2,2666.770408  
14,2,2025.410714  
14,2,2172.750000  
14,2,2180.178571  
14,2,2066.860000  
14,2,3337.804878  
14,2,5085.864130  
14,2,1996.142857  
14,2,3139.860577  
14,2,1578.048780  
14,2,2841.652439  
14,2,1534.615385  
14,2,1995.323864

14,2,2392.442568  
14,2,2561.989286  
14,2,1545.500000  
14,2,7687.293478  
14,2,1653.216346  
14,2,1702.877660  
14,2,1942.375000  
14,2,7935.222826  
14,2,2175.078125  
14,2,1753.333333  
14,2,4890.858696  
14,2,4086.535714  
14,2,2389.750000  
14,2,3098.148438  
14,2,1537.200000  
14,2,1827.481132  
14,2,3144.463415  
14,2,1932.250000  
14,2,2056.338415  
14,2,3370.967105  
14,2,3353.209906  
14,2,2069.380319  
14,2,1848.367347  
14,2,7145.590909  
14,2,1619.520833  
14,2,2100.080000  
14,2,1803.867647  
14,2,5337.637500  
14,2,4311.857143  
14,2,5101.231707  
14,2,1947.036765  
14,2,2006.175676  
14,2,2080.319444  
14,2,4134.437500  
14,2,4303.320755  
14,2,1790.521739  
14,2,1791.387500  
14,2,1811.554545  
14,2,2046.490196  
14,2,3809.970588  
14,2,3198.659574  
14,2,1520.521739  
14,2,1901.574468  
14,2,2539.375000  
14,2,2530.413194  
14,2,7496.583333  
14,2,2856.957547  
14,2,2240.232558  
14,2,2033.874449  
14,2,2499.632653  
14,2,1681.406250  
14,2,2940.553571  
14,2,2025.447674  
14,2,2743.716981  
14,2,1518.308511  
14,2,3802.012931  
14,2,2142.527778  
14,2,1519.931452  
14,2,2293.489583  
14,2,1686.142157  
14,2,3229.779070  
14,2,10210.892857  
14,2,1737.147727  
14,2,1565.144886  
14,2,2459.334906  
14,2,1736.537736

14,2,7267.269231  
14,2,1844.640244  
14,2,1944.281250  
14,2,2208.759615  
14,2,2385.596154  
14,2,1801.000000  
14,2,4660.467593  
14,2,1624.218750  
14,2,1636.186170  
14,2,1594.071429  
14,2,1933.617647  
14,2,2319.215426  
14,2,2128.616279  
14,2,1739.085000  
14,2,4137.003049  
14,2,5498.866848  
14,2,1958.936224  
14,2,1550.716216  
14,2,3876.505102  
14,2,2574.472222  
14,2,1518.156250  
14,2,3281.415094  
14,2,2269.627907  
14,2,1597.512500  
14,2,4041.865000  
14,2,3919.769231  
14,2,3315.120690  
14,2,2842.045918  
14,2,1622.328125  
14,2,1648.750000  
14,2,2139.365385  
14,2,1633.226562  
14,2,2056.684049  
14,2,3814.736842  
14,2,2282.197674  
14,2,3767.165865  
14,2,1949.061224  
14,2,1986.231707  
14,2,2859.916667  
14,2,1781.411932  
14,2,1844.750000  
14,2,1603.816327  
14,2,2331.980263  
14,2,1624.709821  
14,2,2028.406250  
14,2,1907.346154  
14,2,1666.606250  
14,2,1784.569444  
14,2,2643.597826  
14,2,2585.552500  
14,2,2267.886905  
14,2,1918.386719  
14,2,1751.221939  
14,2,1533.913462  
14,2,2572.416667  
14,2,1766.490854  
14,2,4598.603175  
14,2,2001.909884  
14,2,2389.895000  
14,2,1567.937500  
14,2,1595.535714  
14,2,1865.101744  
14,2,1538.170455  
14,2,2430.375000  
14,2,1501.911765  
14,2,3052.378676

14,2,1976.291667  
14,2,1680.070652  
14,2,2726.686813  
14,2,5100.480000  
14,2,2184.105263  
14,2,2449.750000  
14,2,1513.836538  
14,2,1670.447115  
14,2,2295.875000  
14,2,2583.221698  
14,2,2013.908163  
14,2,1801.462766  
14,2,1565.131579  
14,2,4298.316038  
14,2,2669.050000  
14,2,4216.819079  
14,2,1582.211538  
14,2,2294.938776  
14,2,1659.942308  
14,2,1738.859694  
14,2,3893.522059  
14,2,1615.500000  
14,2,1818.902778  
14,2,2400.944444  
14,2,4463.795000  
14,2,2306.136364  
14,2,2296.605263  
14,2,2765.783537  
14,2,2376.993590  
14,2,1858.485714  
14,2,1817.655172  
14,2,1540.416667  
14,2,3884.163462  
14,2,1708.430921  
14,2,1684.387195  
14,2,1572.708333  
14,2,1569.609756  
14,2,2319.463636  
14,2,1735.377660  
14,2,2215.292683  
14,2,1718.017544  
14,2,1922.555556  
14,2,1818.611111  
14,2,1594.975000  
14,2,4823.777439  
14,2,1603.996324  
14,2,5133.380117  
14,2,2264.021277  
14,2,2006.402778  
14,2,1630.825000  
14,2,1648.214286  
14,2,2637.177632  
14,2,1821.900000  
14,2,4453.477941  
14,2,2843.470588  
14,2,5214.589623  
14,2,1576.029070  
14,2,1692.527027  
14,2,3612.005952  
14,2,2464.020408  
14,2,1827.875000  
14,2,2040.971591  
14,2,1586.087500  
14,2,3717.330882  
14,2,2509.412791  
14,2,4886.196429

14,2,3389.459559  
14,2,2525.543269  
14,2,6692.424479  
14,2,7055.723684  
14,2,3278.844388  
14,2,2613.022541  
14,2,1943.915816  
14,2,2221.250000  
14,2,1695.886905  
14,2,1715.948718  
14,2,1704.024390  
14,2,2125.576389  
14,2,1634.161458  
14,2,1547.807692  
14,2,2667.416667  
14,2,1721.435897  
14,2,6373.432692  
14,2,1814.545455  
14,2,1516.542553  
14,2,1608.704545  
14,2,2041.889706  
14,2,2515.544872  
14,2,1834.734043  
14,2,2506.427907  
14,2,1979.090426  
14,2,2031.031250  
14,2,2392.541667  
14,2,1736.472222  
14,2,1553.927083  
14,2,3217.636364  
14,2,1699.566667  
14,2,3756.250000  
14,2,9195.000000  
14,2,1718.602941  
14,2,1750.687500  
14,2,4191.729730  
14,2,1575.319079  
14,2,2187.500000  
14,2,2596.917553  
14,2,2465.901163  
14,2,2157.076754  
14,2,1639.833333  
14,2,9088.111486  
14,2,1501.255319  
14,2,1991.750000  
14,2,1766.556122  
14,2,3229.340909  
14,2,1622.014706  
14,2,2977.240000  
14,2,1869.895349  
14,2,5824.617647  
14,2,8587.120968  
14,2,2050.720930  
14,2,1789.432432  
14,2,1885.250000  
14,2,2310.546053  
14,2,4064.788462  
14,2,1508.809211  
14,2,2153.460106  
14,2,4558.250000  
14,2,2479.755208  
14,2,9286.333333  
14,2,1763.130435  
14,2,5701.951389  
14,2,1549.008929  
14,2,1724.530612

14,2,1535.605392  
14,2,1853.750000  
14,2,7349.655814  
14,2,4749.020408  
14,2,4048.986486  
14,2,2360.847500  
14,2,1827.572581  
14,2,2131.769231  
14,2,2163.293269  
14,2,1544.107143  
14,2,2325.888889  
14,2,2714.612245  
14,2,1543.250000  
14,2,3052.916667  
14,2,1714.784091  
14,2,1707.146341  
14,2,1776.867647  
14,2,2367.531863  
14,2,3406.153846  
14,2,1795.009434  
14,2,2210.714286  
14,2,1649.744048  
14,2,2396.500000  
14,2,2683.490000  
14,2,1856.653302  
14,2,2203.132653  
14,2,1813.516667  
14,2,1584.247024  
14,2,2024.584906  
14,2,3153.660000  
14,2,2153.699405  
14,2,3409.405488  
14,2,4084.702500  
14,2,2748.202703  
14,2,1776.682292  
14,2,1869.112805  
14,2,2329.043478  
14,2,2767.114130  
14,2,2064.367021  
14,2,2311.538462  
14,2,1525.986413  
14,2,3244.307018  
14,2,2187.770833  
14,2,2716.079545  
14,2,2102.905172  
14,2,1710.500000  
14,2,2266.487500  
14,2,1712.421875  
14,2,1992.625000  
14,2,1801.217391  
14,2,2853.250000  
14,2,1795.724138  
14,2,1598.412946  
14,2,4950.071429  
14,2,2158.952128  
14,2,1914.678571  
14,2,1772.406250  
14,2,1506.385714  
14,2,1574.668750  
14,2,1714.234694  
14,2,1516.669643  
14,2,2577.485294  
14,2,2820.437500  
14,2,2561.816860  
14,2,2108.921569  
14,2,1604.840000

14,2,1975.009146  
14,2,1788.340426  
14,2,3087.028646  
14,2,2237.031250  
14,2,1884.511905  
14,2,2114.718750  
14,2,2030.075000  
14,2,2271.558824  
14,2,1675.982143  
14,2,2602.872642  
14,2,1516.295918  
14,2,2395.914894  
14,2,4344.633929  
14,2,1855.826087  
14,2,1999.700000  
14,2,1940.741007  
14,2,1506.882353  
14,2,3620.377660  
14,2,2328.570000  
14,2,1501.091216  
14,2,2103.652439  
14,2,1745.582143  
14,2,2513.763636  
14,2,2207.411458  
14,2,3304.811321  
14,2,1935.790698  
14,2,1795.000000  
14,2,1813.319149  
14,2,4205.423611  
14,2,1784.425000  
14,2,3231.250000  
14,2,1702.948980  
14,2,1623.247093  
14,2,2144.489362  
14,2,1515.758929  
14,2,1634.116279  
14,2,2175.263889  
14,2,2323.703804  
14,2,1896.914216  
14,2,1640.247500  
14,2,4194.755435  
14,2,2898.416667  
14,2,1573.684211  
14,2,1534.063953  
14,2,5536.793605  
14,2,1742.753571  
14,2,1820.606707  
14,2,1510.005952  
14,2,1936.883523  
14,2,1809.554348  
14,2,2028.272727  
14,2,1907.505102  
14,2,1542.174419  
14,2,1633.557432  
14,2,1603.767857  
14,2,2984.210526  
14,2,1515.625000  
14,2,7297.465116  
14,2,2617.520833  
14,2,2266.920732  
14,2,2258.301136  
14,2,1681.062500  
14,2,6435.333333  
14,2,4216.375000  
14,2,2419.567308  
14,2,1858.733333

14,2,6392.206522  
14,2,2789.900943  
14,2,1971.788043  
14,2,2622.884375  
14,2,2501.562500  
14,2,1526.465116  
14,2,5444.307692  
14,2,1569.375000  
14,2,2210.156250  
14,2,2929.866667  
14,2,8558.350543  
14,2,1580.533333  
14,2,2317.697917  
14,2,3344.934524  
14,2,1690.934211  
14,2,1548.883721  
14,2,2054.835526  
14,2,5831.020833  
14,2,7138.843750  
14,2,5736.398810  
14,2,1505.517442  
14,2,1754.494792  
14,2,2110.101744  
14,2,1825.872449  
14,2,3510.924528  
14,2,2067.745370  
14,2,1943.643617  
14,2,1927.759615  
14,2,1690.600000  
14,2,6874.593750  
14,2,2260.945312  
14,2,2196.750000  
14,2,3110.923077  
14,2,3104.750000  
14,2,1657.945946  
14,2,1749.477500  
14,2,2370.804688  
14,2,2331.281915  
14,2,2367.117647  
14,2,2515.127660  
14,2,1687.764151  
14,2,2020.425926  
14,2,1795.512195  
14,2,1721.208333  
14,2,2189.717105  
14,2,2314.826531  
14,2,1730.432292  
14,2,3292.256039  
14,2,1789.407407  
14,2,2204.250000  
14,2,3084.912500  
14,2,3052.726064  
14,2,1551.122449  
14,2,2154.327830  
14,2,2084.662500  
14,2,1566.230000  
14,2,3447.727273  
14,2,4578.300000  
14,2,2448.156250  
14,2,1666.217391  
14,2,2162.550000  
14,2,2979.055556  
14,2,1503.988372  
14,2,7984.697674  
14,2,5808.432292  
14,2,3322.459184

14,2,1583.994792  
14,2,7683.145833  
14,2,1606.520833  
14,2,2412.943396  
14,2,2148.394022  
14,2,5677.041667  
14,2,2367.360000  
14,2,3169.696078  
14,2,1682.000000  
14,2,2430.640957  
14,2,2541.701705  
14,2,1603.505682  
14,2,4951.404255  
14,2,2983.923077  
14,2,1544.276596  
14,2,2756.377049  
14,2,2772.397059  
14,2,1586.330189  
14,2,3652.816176  
14,2,1853.804348  
14,2,3418.119792  
14,2,1565.504630  
14,2,1848.828947  
14,2,3074.775000  
14,2,1582.019737  
14,2,1807.750000  
14,2,2554.892857  
14,2,2068.325000  
14,2,2324.354592  
14,2,1824.172872  
14,2,2220.500000  
14,2,1581.588235  
14,2,3447.331395  
14,2,2940.564904  
14,2,1944.546196  
14,2,1792.321429  
14,2,2247.551020  
14,2,2140.562500  
14,2,1596.075658  
14,2,2191.157500  
14,2,2608.189286  
14,2,2091.750000  
14,2,2152.766892  
14,2,3947.151163  
14,2,3232.825521  
14,2,2024.636792  
14,2,4155.339286  
14,2,5264.730000  
14,2,1763.191489  
14,2,3655.970588  
14,2,1660.888889  
14,2,1552.750000  
14,2,2743.232558  
14,2,2138.552632  
14,2,3462.930481  
14,2,5850.217391  
14,2,2441.300532  
14,2,2182.081395  
14,2,1835.740000  
14,2,1738.954082  
14,2,2004.022059  
14,2,2784.651316  
14,2,14488.152500  
14,2,1513.520000  
14,2,1618.036585  
14,2,1927.083333

14,2,2152.733333  
14,2,1964.502358  
14,2,1530.558824  
14,2,2810.719907  
14,2,1505.660000  
14,2,2964.187500  
14,2,3889.859375  
14,2,2974.210526  
14,2,1591.210714  
14,2,1631.900000  
14,2,17487.240132  
14,2,1751.953488  
14,2,1732.980263  
14,2,1684.882075  
14,2,4540.412338  
14,2,1731.044643  
14,2,13253.455357  
14,2,2086.713068  
14,2,3604.055000  
14,2,2825.098404  
14,2,1858.174528  
14,2,1558.222222  
14,2,3569.405405  
14,2,2026.745192  
14,2,2316.400000  
14,2,1751.931818  
14,2,1539.080357  
14,2,1746.418367  
14,2,2753.822917  
14,2,1709.946023  
14,2,1953.847500  
14,2,2189.750000  
14,2,1725.976064  
14,2,1908.045918  
14,2,2508.212766  
14,2,1754.952381  
14,2,4213.716981  
14,2,1590.525000  
14,2,3394.347826  
14,2,1897.473958  
14,2,1917.918367  
14,2,1505.809524  
14,2,3264.784314  
14,2,6624.040816  
14,2,2859.744681  
14,2,1828.173295  
14,2,1510.216216  
14,2,1775.794872  
14,2,1875.705729  
14,2,1601.250000  
14,2,2141.683673  
14,2,1968.083333  
14,2,2048.961538  
14,2,2052.277439  
14,2,2112.510870  
14,2,1507.027174  
14,2,2136.036765  
14,2,1679.801829  
14,2,2589.018750  
14,2,1510.147727  
14,2,6527.879032  
14,2,1768.265957  
14,2,3700.188679  
14,2,1920.104651  
14,2,1550.665179  
14,2,2723.035714

14,2,2876.857143  
14,2,1919.580357  
14,2,1569.804878  
14,2,1692.283784  
14,2,1649.091981  
14,2,2146.459184  
14,2,1581.906250  
14,2,1717.693627  
14,2,2234.609043  
14,2,14526.427632  
14,2,2068.603774  
14,2,1515.258929  
14,2,4019.702703  
14,2,1624.357955  
14,2,1994.728448  
14,2,6304.405488  
14,2,1742.280702  
14,2,2431.174419  
14,2,1910.617801  
14,2,2097.328125  
14,2,3168.805556  
14,2,2670.723684  
14,2,1636.835227  
14,2,1703.511364  
14,2,5775.897059  
14,2,1519.190476  
14,2,1562.854167  
14,2,1556.952778  
14,2,7706.806818  
14,2,3962.490000  
14,2,7502.727273  
14,2,1816.316327  
14,2,5871.705882  
14,2,1688.000000  
14,2,3330.419118  
14,2,1788.496875  
14,2,1752.200000  
14,2,1634.758929  
14,2,3194.911585  
14,2,1565.256098  
14,2,1714.109043  
14,2,1568.636943  
14,2,7331.056452  
14,2,1857.600000  
14,2,1688.193548  
14,2,1991.500000  
14,2,1722.897059  
14,2,2247.339286  
14,2,1710.888889  
14,2,2086.258721  
14,2,1610.573661  
14,2,2733.960000  
14,2,2025.630952  
14,2,1634.575000  
14,2,2408.771277  
14,2,2352.000000  
14,2,1721.076923  
14,2,2068.421053  
14,2,2019.187500  
14,2,9101.956522  
14,2,2462.101190  
14,2,3344.705882  
14,2,1635.800000  
14,2,1707.352941  
14,2,1788.481132  
14,2,1957.053571

14,2,2522.758621  
14,2,1988.800000  
14,2,5700.858974  
14,2,2087.707447  
14,2,1609.842500  
14,2,2071.250000  
14,2,1756.667763  
14,2,2612.164286  
14,2,1597.290816  
14,2,2833.933962  
14,2,3946.761792  
14,2,2307.583333  
14,2,2633.841518  
14,2,2231.046875  
14,2,3134.967949  
14,2,3547.988095  
14,2,2003.113426  
14,2,1599.812500  
14,2,1589.478723  
14,2,1895.431604  
14,2,6675.919643  
14,2,1530.861702  
14,2,2560.946809  
14,2,1886.160377  
14,2,2061.195946  
14,2,7842.912791  
14,2,1996.733491  
14,2,2092.439815  
14,2,1974.329787  
14,2,2061.836735  
14,2,1833.215909  
14,2,2712.862500  
14,2,2389.149038  
14,2,2737.915816  
14,2,3254.710938  
14,2,2007.252874  
14,2,3462.250000  
14,2,2259.162791  
14,2,1744.154070  
14,2,1633.147959  
14,2,2160.510204  
14,2,3448.307692  
14,2,1536.000000  
14,2,2131.531250  
14,2,1751.461111  
14,2,2088.808140  
14,2,1877.463415  
14,2,2808.691327  
14,2,5710.940000  
14,2,1721.170330  
14,2,1893.788690  
14,2,2178.018519  
14,2,4344.219512  
14,2,4481.614286  
14,2,1922.385638  
14,2,1952.084091  
14,2,1799.439815  
14,2,1669.053977  
14,2,1656.497396  
14,2,2420.180085  
14,2,8058.640000  
14,2,1884.201220  
14,2,2919.750000  
14,2,2087.000000  
14,2,2004.500000  
14,2,2475.817073

14,2,2226.035714  
14,2,1931.925000  
14,2,2071.104730  
14,2,1637.040541  
14,2,1780.433673  
14,2,6358.538462  
14,2,3757.375000  
14,2,2076.824074  
14,2,2088.700000  
14,2,2412.807692  
14,2,2107.777273  
14,2,2721.625000  
14,2,6038.974138  
14,2,1837.846154  
14,2,1531.098214  
14,2,2220.293269  
14,2,1501.937500  
14,2,2325.044118  
14,2,1542.159091  
14,2,2236.353723  
14,2,1744.434783  
14,2,4666.403509  
14,2,2405.833333  
14,2,2245.937500  
14,2,3358.000000  
14,2,1596.541667  
14,2,2294.767241  
14,2,1984.235294  
14,2,3425.984375  
14,2,3394.438596  
14,2,2068.327778  
14,2,1706.598214  
14,2,2026.039062  
14,2,1585.581633  
14,2,2006.361979  
14,2,2593.442708  
14,2,2085.562874  
14,2,1708.321429  
14,2,4033.003205  
14,2,1571.383523  
14,2,2801.278846  
14,2,1997.982558  
14,2,1996.525568  
14,2,2414.238636  
14,2,1528.833333  
14,2,2667.950000  
14,2,3314.981250  
14,2,2660.233696  
14,2,2854.311224  
14,2,1885.316327  
14,2,1688.538043  
14,2,3389.834375  
14,2,2592.980769  
14,2,1844.267442  
14,2,1755.352941  
14,2,1512.640625  
14,2,2553.750000  
14,2,1874.745536  
14,2,4030.683962  
14,2,1605.160714  
14,2,2126.852273  
14,2,1902.185976  
14,2,1656.154412  
14,2,2018.662500  
14,2,1657.630556  
14,2,1850.384868

14,2,1501.314189  
14,2,1609.636364  
14,2,2158.720745  
14,2,2828.558824  
14,2,2215.153061  
14,2,1960.677885  
14,2,1773.312500  
14,2,1893.456395  
14,2,3562.500000  
14,2,1702.102041  
14,2,5109.977273  
14,2,6152.227273  
14,2,1680.310714  
14,2,2333.716667  
14,2,4058.062500  
14,2,1710.529412  
14,2,2027.368056  
14,2,1844.362705  
14,2,1803.107143  
14,2,3177.987903  
14,2,1515.800000  
14,2,1752.911765  
14,2,3621.451531  
14,2,3423.868421  
14,2,1541.900000  
14,2,1555.300000  
14,2,1963.227273  
14,2,1818.031250  
14,2,2166.940000  
14,2,2144.848404  
14,2,3924.365385  
14,2,4182.310000  
14,2,2496.425000  
14,2,1588.215426  
14,2,1619.951220  
14,2,1663.558282  
14,2,1879.205000  
14,2,1956.442308  
14,2,2467.340909  
14,2,1718.401163  
14,2,1536.842391  
14,2,3670.069149  
14,2,2602.140625  
14,2,2814.616279  
14,2,1541.178571  
14,2,2471.394022  
14,2,1658.769444  
14,2,1812.847222  
14,2,2333.912234  
14,2,2403.180804  
14,2,1577.703947  
14,2,2320.593750  
14,2,1614.553571  
14,2,2328.144737  
14,2,2894.717213  
14,2,1819.571429  
14,2,2405.116379  
14,2,1951.792614  
14,2,19178.916667  
14,2,2374.163194  
14,2,1666.791667  
14,2,3057.445455  
14,2,2768.759434  
14,2,7261.351351  
14,2,3921.364130  
14,2,1568.417969

14,2,2688.090278  
14,2,1858.483607  
14,2,1571.405556  
14,2,4815.394886  
14,2,1846.069767  
14,2,3048.463415  
14,2,2776.075893  
14,2,1609.000000  
14,2,2625.461957  
14,2,2644.135965  
14,2,2529.312500  
14,2,2836.911765  
14,2,3348.546875  
14,2,2702.620000  
14,2,1533.420000  
14,2,1704.196809  
14,2,6204.930233  
14,2,1647.828488  
14,2,1535.207547  
14,2,1505.963415  
14,2,3929.371622  
14,2,2243.389706  
14,2,1846.076923  
14,2,2004.880208  
14,2,3460.982955  
14,2,2765.581522  
14,2,1502.500000  
14,2,1655.443182  
14,2,1943.478659  
14,2,1819.341667  
14,2,1852.861111  
14,2,7149.928191  
14,2,3084.250000  
14,2,2608.375000  
14,2,2089.238636  
14,2,2538.286765  
14,2,2580.968750  
14,2,1523.163158  
14,2,2645.672269  
14,2,3522.146341  
14,2,3232.407407  
14,2,2270.600000  
14,2,3541.272727  
14,2,4104.482759  
14,2,1542.050000  
14,2,2859.813725  
14,2,1587.215625  
14,2,3058.484043  
14,2,1819.632653  
14,2,1599.244681  
14,2,9715.855263  
14,2,2328.913043  
14,2,1660.804878  
14,2,2340.494681  
14,2,1987.387821  
14,2,1686.323171  
14,2,2725.820513  
14,2,2314.750000  
14,2,2180.034314  
14,2,2201.352941  
14,2,1986.600543  
14,2,1653.946809  
14,2,1943.968750  
14,2,1991.444444  
14,2,1996.397727  
14,2,3078.476562

14,2,3468.900943  
14,2,1529.419872  
14,2,1576.900568  
14,2,2393.941176  
14,2,1822.182432  
14,2,3124.706522  
14,2,3932.045000  
14,2,17483.593750  
14,2,1657.500000  
14,2,2801.736979  
14,2,13477.839286  
14,2,1617.558511  
14,2,1717.047619  
14,2,2183.791667  
14,2,1606.812500  
14,2,1874.518182  
14,2,1542.647059  
14,2,4828.805556  
14,2,1656.230769  
14,2,1514.918919  
14,2,13014.857143  
14,2,15470.075000  
14,2,1917.718750  
14,2,2446.983051  
14,2,6602.074468  
14,2,1708.724432  
14,2,2261.950000  
14,2,4771.211735  
14,2,1850.482143  
14,2,2199.795455  
14,2,5788.062500  
14,2,1636.750000  
14,2,1793.289474  
14,2,2588.283854  
14,2,11276.142857  
14,2,1652.559211  
14,2,3258.638889  
14,2,3447.513889  
14,2,5406.891827  
14,2,14777.021341  
14,2,7164.424419  
14,2,3942.191860  
14,2,1692.785714  
14,2,1580.585526  
14,2,3837.166667  
14,2,2066.647727  
14,2,1725.007812  
14,2,2287.067308  
14,2,2560.058824  
14,2,3316.734375  
14,2,2020.548913  
14,2,1961.665179  
14,2,1575.609756  
14,2,1781.850490  
14,2,1809.853723  
14,2,1515.533654  
14,2,1547.697917  
14,2,5616.966981  
14,2,1902.522959  
14,2,1916.409722  
14,2,10879.375000  
14,2,2487.166667  
14,2,1733.265625  
14,2,2020.725490  
14,2,1641.201923  
14,2,1752.250000

14,2,2351.687500  
14,2,1525.218750  
14,2,1560.000000  
14,2,2007.100000  
14,2,1512.000000  
14,2,1579.147436  
14,2,4397.454545  
14,2,3383.135870  
14,2,2064.595745  
14,2,1976.791667  
14,2,2520.000000  
14,2,2249.375000  
14,2,2250.218750  
14,2,1965.382979  
14,2,2130.005102  
14,2,3042.560811  
14,2,1704.888298  
14,2,2195.692308  
14,2,1635.308140  
14,2,2162.558140  
14,2,3151.105263  
14,2,2286.281250  
14,2,2228.596154  
14,2,6058.537736  
14,2,1570.794643  
14,2,3108.544643  
14,2,1813.829082  
14,2,1792.490385  
14,2,1786.052632  
14,2,3364.605392  
14,2,2283.058594  
14,2,1555.060976  
14,2,6062.156250  
14,2,1815.926136  
14,2,1901.666667  
14,2,1972.000000  
14,2,1969.312500  
14,2,2233.174419  
14,2,2002.188679  
14,2,1799.235294  
14,2,2666.670213  
14,2,1554.383929  
14,2,1568.212264  
14,2,1542.369681  
14,2,1741.250000  
14,2,2567.148936  
14,2,2495.038462  
14,2,2661.979167  
14,2,1954.596154  
14,2,1742.087500  
14,2,2533.766667  
14,2,1892.383333  
14,2,2895.739362  
14,2,1798.453488  
14,2,1964.461538  
14,2,2907.454861  
14,2,1995.625000  
14,2,1715.935829  
14,2,2471.104167  
14,2,1622.197115  
14,2,1639.727273  
14,2,2700.224359  
14,2,2170.522959  
14,2,3455.298077  
14,2,2010.700000  
14,2,1549.817708

14,2,2118.901163  
14,2,2602.000000  
14,2,2974.853571  
14,2,3504.039216  
14,2,1838.607143  
14,2,2685.343023  
14,2,1679.217391  
14,2,1898.500000  
14,2,3455.191176  
14,2,3351.478261  
14,2,17527.686441  
14,2,17993.051471  
14,2,1512.166667  
14,2,1585.303191  
14,2,5058.250000  
14,2,1556.005435  
14,2,4951.607143  
14,2,1745.760417  
14,2,1655.139881  
14,2,2024.476190  
14,2,1618.875000  
14,2,1658.761364  
14,2,1916.312500  
14,2,3081.630682  
14,2,4036.961957  
14,2,1776.035714  
14,2,9694.020833  
14,2,4981.460106  
14,2,5974.750000  
14,2,3637.863095  
14,2,2547.733668  
14,2,3078.837838  
14,2,2451.596939  
14,2,2587.661458  
14,2,1621.053279  
14,2,1762.000000  
14,2,3123.400000  
14,2,1886.000000  
14,2,14076.631579  
14,2,1774.875000  
14,2,1733.612500  
14,2,1928.906915  
14,2,1588.768868  
14,2,1645.840909  
14,2,3856.644737  
14,2,3968.050000  
14,2,3021.856707  
14,2,1842.984043  
14,2,1551.938725  
14,2,2287.573864  
14,2,2030.062500  
14,2,1572.576923  
14,2,2745.755682  
14,2,1529.633333  
14,2,3976.018382  
14,2,1747.968137  
14,2,1539.117021  
14,2,16401.864865  
14,2,2993.281977  
14,2,1655.639205  
14,2,2909.400000  
14,2,1588.435897  
14,2,1607.785714  
14,2,2207.615385  
14,2,2045.177778  
14,2,2697.935000

14,2,1802.815000  
14,2,4980.432432  
14,2,2541.926829  
14,2,1944.450000  
14,2,1771.625000  
14,2,2487.304348  
14,2,1573.048387  
14,2,2131.459184  
14,2,3032.537500  
14,2,1674.523585  
14,2,7574.000000  
14,2,2471.042683  
14,2,1536.500000  
14,2,3250.166667  
14,2,2909.113208  
14,2,1663.594340  
14,2,5048.195000  
14,2,2127.882653  
14,2,4149.641892  
14,2,2138.571429  
14,2,1753.250000  
14,2,3128.435096  
14,2,7226.710366  
14,2,3134.867925  
14,2,2276.583333  
14,2,1695.375000  
14,2,1758.187500  
14,2,4896.750000  
14,2,1860.394737  
14,2,2014.500000  
14,2,1711.162162  
14,2,6008.718750  
14,2,1662.116959  
14,2,2449.800926  
14,2,2489.548077  
14,2,3165.741071  
14,2,1602.377551  
14,2,6097.860294  
14,2,1554.936170  
14,2,1534.410000  
14,2,1829.970395  
14,2,2696.071429  
14,2,1825.230114  
14,2,1939.985577  
14,2,3296.670918  
14,2,7490.138298  
14,2,1592.142857  
14,2,2021.109375  
14,2,1918.765306  
14,2,2223.823113  
14,2,2721.369565  
14,2,1737.208333  
14,2,1669.507500  
14,2,2315.000000  
14,2,8213.389706  
14,2,1548.829861  
14,2,2509.488636  
14,2,2159.144022  
14,2,2110.080357  
14,2,1989.140306  
14,2,2044.485294  
14,2,3456.015625  
14,2,1720.773148  
14,2,3152.540761  
14,2,3863.931034  
14,2,2633.416667

14,2,3321.087766  
14,2,1783.794118  
14,2,3035.648649  
14,2,3201.869565  
14,2,3524.607143  
14,2,1568.665761  
14,2,1758.648352  
14,2,2133.050000  
14,2,2452.734375  
14,2,1813.833333  
14,2,2589.275000  
14,2,1658.617647  
14,2,3309.325000  
14,2,1963.745000  
14,2,1656.024194  
14,2,2557.447368  
14,2,2160.325000  
14,2,2831.330882  
14,2,2053.228261  
14,2,1674.238095  
14,2,1861.302632  
14,2,2160.544118  
14,2,2262.132353  
14,2,3637.639535  
14,2,2073.687500  
14,2,1944.866848  
14,2,3043.157895  
14,2,2693.600000  
14,2,2298.008772  
14,2,1711.925000  
14,2,3264.595238  
14,2,1499.671569  
14,2,2283.227273  
14,2,1818.846154  
14,2,1963.898305  
14,2,1858.425000  
14,2,2005.981383  
14,2,2965.105263  
14,2,3079.930556  
14,2,2300.800000  
14,2,4203.814189  
14,2,2801.375000  
14,2,3423.621795  
14,2,1539.849490  
14,2,2421.614583  
14,2,3630.435976  
14,2,1734.877976  
14,2,5514.584821  
14,2,3424.744186  
14,2,7676.218750  
14,2,2221.780172  
14,2,7808.113208  
14,2,4226.653846  
14,2,4962.322581  
14,2,1847.842105  
14,2,1634.230769  
14,2,2018.531915  
14,2,2454.471939  
14,2,4652.250000  
14,2,4593.863636  
14,2,3431.484043  
14,2,1696.923077  
14,2,3565.823171  
14,2,1777.600000  
14,2,2032.875000  
14,2,4275.701987

14,2,3103.726190  
14,2,2038.500000  
14,2,2142.795918  
14,2,5223.151316  
14,2,2112.338542  
14,2,1856.701705  
14,2,3007.794118  
14,2,2105.625000  
14,2,1516.004310  
14,2,2949.449074  
14,2,2183.829545  
14,2,6686.000000  
14,2,1982.552632  
14,2,2738.212766  
14,2,1679.975000  
14,2,1758.760417  
14,2,1670.840909  
14,2,1654.387500  
14,2,2638.213942  
14,2,2879.543478  
14,2,2940.767442  
14,2,2177.365132  
14,2,3963.544643  
14,2,1975.125000  
14,2,2642.349359  
14,2,2893.417683  
14,2,3080.098214  
14,2,3453.409091  
14,2,7529.827206  
14,2,1658.177885  
14,2,1692.200000  
14,2,1771.964674  
14,2,1677.425532  
14,2,5695.539216  
14,2,1872.609375  
14,2,4578.007576  
14,2,3215.942500  
14,2,1533.093023  
14,2,2557.800000  
14,2,1795.250000  
14,2,2125.979651  
14,2,1959.415179  
14,2,10657.474576  
14,2,1920.986111  
14,2,1806.346154  
14,2,1875.853659  
14,2,1568.725000  
14,2,2267.541667  
14,2,1682.864583  
14,2,1977.391509  
14,2,1680.969828  
14,2,1572.558824  
14,2,3133.787234  
14,2,3155.595745  
14,2,2890.754717  
14,2,2950.437500  
14,2,2162.029412  
14,2,1947.914894  
14,2,1887.880000  
14,2,1619.255208  
14,2,1983.851190  
14,2,2235.581522  
14,2,2121.054054  
14,2,1942.364362  
14,2,1888.684896  
14,2,1921.893750

14,2,1561.147959  
14,2,3251.433673  
14,2,1698.406250  
14,2,2930.412500  
14,2,2413.756250  
14,2,1557.985294  
14,2,2009.075581  
14,2,1626.413551  
14,2,2829.657895  
14,2,1665.366667  
14,2,1542.184211  
14,2,3102.093750  
14,2,3449.746622  
14,2,12685.746795  
14,2,5092.772541  
14,2,2206.470588  
14,2,1809.897436  
14,2,1533.445652  
14,2,1576.621622  
14,2,2979.842949  
14,2,2351.078947  
14,2,5677.982955  
14,2,1528.040761  
14,2,1892.892500  
14,2,1561.711957  
14,2,3741.044118  
14,2,2075.511111  
14,2,1837.369898  
14,2,2353.333333  
14,2,1954.596154  
14,2,2060.263889  
14,2,1562.269231  
14,2,1928.812500  
14,2,2200.333333  
14,2,4101.384615  
14,2,4970.833333  
14,2,1596.574074  
14,2,2493.632576  
14,2,1876.296296  
14,2,3541.872596  
14,2,3472.247024  
14,2,1860.747685  
14,2,1537.704545  
14,2,2010.866477  
14,2,1835.102941  
14,2,1607.687500  
14,2,2073.398256  
14,2,1595.494681  
14,2,5897.000000  
14,2,16356.380682  
14,2,1546.058333  
14,2,9690.416667  
14,2,3030.062500  
14,2,1529.190217  
14,2,5180.970238  
14,2,1922.882075  
14,2,2333.218750  
14,2,2250.432432  
14,2,3116.916667  
14,2,2962.716981  
14,2,5261.690000  
14,2,1506.903846  
14,2,1966.710227  
14,2,2228.768293  
14,2,1506.000000  
14,2,1504.208333

14,2,1848.963415  
14,2,1951.358333  
14,2,4314.653061  
14,2,2201.177326  
14,2,2326.090278  
14,2,2475.833333  
14,2,1692.464286  
14,2,2555.965000  
14,2,2232.290909  
14,2,2022.854167  
14,2,2105.100543  
14,2,2250.747093  
14,2,1713.909091  
14,2,1641.857143  
14,2,2494.400000  
14,2,1560.962500  
14,2,1906.809659  
14,2,1776.080128  
14,2,2650.450521  
14,2,2250.619444  
14,2,1803.720930  
14,2,4486.982143  
14,2,1663.697917  
14,2,1815.500000  
14,2,1586.518750  
14,2,1564.931818  
14,2,1687.777778  
14,2,2290.110795  
14,2,1731.437500  
14,2,6975.774194  
14,2,2039.750000  
14,2,1965.276442  
14,2,2067.487500  
14,2,1523.260417  
14,2,2657.169118  
14,2,1915.544444  
14,2,3834.526316  
14,2,5478.387019  
14,2,1668.066667  
14,2,2805.507353  
14,2,3632.323529  
14,2,2380.090000  
14,2,2338.875000  
14,2,2001.254717  
14,2,1657.351562  
14,2,2439.118750  
14,2,2272.208333  
14,2,1864.627841  
14,2,2439.492347  
14,2,1632.558824  
14,2,1684.390957  
14,2,4755.385000  
14,2,2585.061111  
14,2,1570.217391  
14,2,1552.604167  
14,2,2209.307692  
14,2,2486.043478  
14,2,2524.166667  
14,2,1524.632653  
14,2,3306.600000  
14,2,7714.456140  
14,2,2084.922872  
14,2,4528.209906  
14,2,1976.646739  
14,2,1956.833333  
14,2,1862.968023

14,2,2928.074468  
14,2,1550.140625  
14,2,2430.058140  
14,2,1600.912500  
14,2,3267.623037  
14,2,2063.111842  
14,2,1815.738095  
14,2,3253.715116  
14,2,2315.166667  
14,2,1504.707447  
14,2,2063.674419  
14,2,2957.328125  
14,2,2752.108108  
14,2,3751.023438  
14,2,2302.160156  
14,2,3261.050000  
14,2,5288.381579  
14,2,1720.264205  
14,2,3533.003205  
14,2,2191.539773  
14,2,1807.893617  
14,2,2673.632212  
14,2,1698.212766  
14,2,2079.769231  
14,2,1580.925532  
14,2,1708.918478  
14,2,1661.634804  
14,2,3114.240196  
14,2,1721.389535  
14,2,4161.666667  
14,2,6797.556818  
14,2,1674.196429  
14,2,2487.000000  
14,2,2095.656250  
14,2,1666.203704  
14,2,5625.652778  
14,2,1736.561404  
14,2,2461.127660  
14,2,3469.413793  
14,2,2596.079295  
14,2,2215.018382  
14,2,5545.416667  
14,2,2508.705882  
14,2,1915.923469  
14,2,1505.159884  
14,2,1761.236702  
14,2,1645.112069  
14,2,1604.808511  
14,2,1854.069149  
14,2,4479.583333  
14,2,1623.156977  
14,2,1560.289634  
14,2,4556.886792  
14,2,1530.404891  
14,2,3782.044444  
14,2,2434.029412  
14,2,1589.395833  
14,2,1859.364130  
14,2,6579.527778  
14,2,2923.408163  
14,2,1677.967500  
14,2,5534.080000  
14,2,2318.090116  
14,2,2228.759615  
14,2,3069.774854  
14,2,3388.273585

14,2,10280.663265  
14,2,3549.611111  
14,2,1766.859375  
14,2,1549.766026  
14,2,1506.187500  
14,2,1514.841667  
14,2,2563.571429  
14,2,2277.906977  
14,2,2125.189904  
14,2,2670.917453  
14,2,1753.208333  
14,2,2186.320312  
14,2,2438.293605  
14,2,1889.769231  
14,2,1523.809045  
14,2,1929.551020  
14,2,2067.773810  
14,2,1803.788934  
14,2,2601.750000  
14,2,1799.175595  
14,2,1529.519231  
14,2,1694.750000  
14,2,3162.891026  
14,2,2091.416667  
14,2,2840.084135  
14,2,2263.655172  
14,2,2038.000000  
14,2,2455.843750  
14,2,1914.292453  
14,2,2915.735119  
14,2,4817.230000  
14,2,1897.750000  
14,2,1603.217857  
14,2,2105.431548  
14,2,2224.078431  
14,2,3533.926829  
14,2,2159.203704  
14,2,2792.461538  
14,2,1514.400000  
14,2,4229.937500  
14,2,2862.646341  
14,2,1605.378205  
14,2,4258.226190  
14,2,1712.094444  
14,2,3808.395455  
14,2,1591.672872  
14,2,3053.667453  
14,2,1505.062500  
14,2,1538.269886  
14,2,2695.340909  
14,2,1936.013889  
14,2,1921.275510  
14,2,2432.788462  
14,2,1574.616279  
14,2,1551.924020  
14,2,4210.834906  
14,2,2836.226974  
14,2,1744.903061  
14,2,1553.439024  
14,2,1693.702703  
14,2,1770.147059  
14,2,1523.591837  
14,2,17932.996875  
14,2,1565.979730  
14,2,1875.802326  
14,2,1635.225000

14,2,2122.318182  
14,2,3001.692857  
14,2,3538.072222  
14,2,1573.177632  
14,2,3078.925532  
14,2,1808.142857  
14,2,1744.205882  
14,2,3278.839286  
14,2,1544.357143  
14,2,1827.752551  
14,2,2108.675676  
14,2,1974.228571  
14,2,1981.862069  
14,2,2474.922619  
14,2,1536.250000  
14,2,2461.707317  
14,2,2569.178571  
14,2,2812.801020  
14,2,2075.948980  
14,2,1840.310000  
14,2,1940.720588  
14,2,2511.090909  
14,2,2123.957547  
14,2,1916.639881  
14,2,1752.919643  
14,2,3724.093750  
14,2,1620.480000  
14,2,3663.752604  
14,2,5608.888393  
14,2,2096.850000  
14,2,1972.122093  
14,2,1694.292857  
14,2,2362.093023  
14,2,4671.276442  
14,2,6144.752660  
14,2,2008.922222  
14,2,3512.866071  
14,2,2273.424460  
14,2,1884.292453  
14,2,1790.558140  
14,2,5039.530488  
14,2,3545.521739  
14,2,1754.952830  
14,2,2025.932692  
14,2,2938.437500  
14,2,1947.616071  
14,2,3917.416318  
14,2,9477.048128  
14,2,1594.092262  
14,2,1518.625000  
14,2,1717.769231  
14,2,1784.695313  
14,2,2815.218750  
14,2,1686.065104  
14,2,4660.556818  
14,2,1617.650000  
14,2,3963.042763  
14,2,5108.162791  
14,2,1558.605769  
14,2,1687.806818  
14,2,1883.110119  
14,2,2351.294271  
14,2,1809.883929  
14,2,2111.700000  
14,2,1950.988372  
14,2,1589.365854

14,2,2198.729167  
14,2,1946.473684  
14,2,2528.686047  
14,2,1907.632353  
14,2,7126.108553  
14,2,2181.200000  
14,2,1664.622024  
14,2,2878.098684  
14,2,3440.500000  
14,2,1965.936321  
14,2,1891.893750  
14,2,4643.125000  
14,2,1528.455882  
14,2,1594.858696  
14,2,2048.452830  
14,2,2188.375000  
14,2,3187.903846  
14,2,1948.255952  
14,2,1658.764205  
14,2,2135.400000  
14,2,1608.652500  
14,2,2365.909091  
14,2,1718.178571  
14,2,2786.977564  
14,2,1645.546512  
14,2,19379.768750  
14,2,2307.625000  
14,2,1773.227273  
14,2,2913.414894  
14,2,1537.852941  
14,2,1505.425676  
14,2,1779.372340  
14,2,1680.587500  
14,2,1895.823529  
14,2,2528.342857  
14,2,2570.307692  
14,2,1738.897059  
14,2,3150.794271  
14,2,3007.712766  
14,2,1948.173077  
14,2,13841.860465  
14,2,1651.997685  
14,2,1625.857143  
14,2,1577.818452  
14,2,1796.975610  
14,2,1565.785714  
14,2,4228.625000  
14,2,1773.963415  
14,2,1551.000000  
14,2,1546.949468  
14,2,2311.894737  
14,2,1574.353261  
14,2,4387.107143  
14,2,1708.704268  
14,2,1510.921875  
14,2,2028.705000  
14,2,2674.461310  
14,2,1695.923077  
14,2,1576.135870  
14,2,5325.406250  
14,2,1712.714286  
14,2,2134.272059  
14,2,3576.613636  
14,2,1909.733974  
14,2,1729.307692  
14,2,1816.000000

14,2,3897.965812  
14,2,1825.536458  
14,2,2280.829741  
14,2,5579.483108  
14,2,1849.545455  
14,2,4040.571429  
14,2,3008.979167  
14,2,2169.173469  
14,2,1846.225000  
14,2,1517.361111  
14,2,1979.521341  
14,2,2086.297872  
14,2,3661.301471  
14,2,5477.203947  
14,2,1571.731383  
14,2,6439.273438  
14,2,2553.635000  
14,2,3317.216418  
14,2,1562.108696  
14,2,2974.353659  
14,2,2532.464286  
14,2,1937.353261  
14,2,1721.560000  
14,2,2215.682692  
14,2,2153.500000  
14,2,1876.706250  
14,2,2078.855000  
14,2,4012.448529  
14,2,2362.820946  
14,2,1606.198171  
14,2,4593.468085  
14,2,1510.633929  
14,2,1919.546512  
14,2,1701.243243  
14,2,1775.752500  
14,2,4211.767857  
14,2,2302.828704  
14,2,1733.625000  
14,2,2444.612500  
14,2,5974.387755  
14,2,4908.000000  
14,2,2805.573770  
14,2,2283.781250  
14,2,1957.312500  
14,2,3591.340000  
14,2,3764.483696  
14,2,1698.181250  
14,2,4384.875000  
14,2,1844.403846  
14,2,1920.653846  
14,2,2263.917553  
14,2,1675.000000  
14,2,2966.187500  
14,2,1727.902344  
14,2,1727.254808  
14,2,2483.286932  
14,2,1983.085366  
14,2,2551.875000  
14,2,1507.772222  
14,2,2082.098404  
14,2,1544.723214  
14,2,1876.000000  
14,2,1765.437500  
14,2,1756.082500  
14,2,2008.737805  
14,2,2515.638158

14,2,1524.822222  
14,2,2728.747024  
14,2,3342.601974  
14,2,3816.937500  
14,2,2219.029412  
14,2,2186.500000  
14,2,2041.953947  
14,2,3383.712500  
14,2,2553.045455  
14,2,2533.528846  
14,2,3963.437500  
14,2,1547.210784  
14,2,2114.966216  
14,2,1731.151442  
14,2,1798.500000  
14,2,3094.705882  
14,2,2354.456522  
14,2,2049.115854  
14,2,1657.608247  
14,2,1861.865979  
14,2,1580.186047  
14,2,1748.456818  
14,2,1876.156818  
14,2,1708.676471  
14,2,2119.503676  
14,2,1673.433673  
14,2,2287.318182  
14,2,10977.526316  
14,2,1685.875000  
14,2,1802.342391  
14,2,2071.240741  
14,2,1845.255814  
14,2,1661.000000  
14,2,1816.452381  
14,2,1791.404762  
14,2,2789.234375  
14,2,2344.995098  
14,2,1577.968750  
14,2,2268.645408  
14,2,7964.138298  
14,2,2855.363636  
14,2,1935.978022  
14,2,5266.201923  
14,2,1681.920455  
14,2,1833.326389  
14,2,2091.182927  
14,2,2003.761905  
14,2,7942.723404  
14,2,12625.681818  
14,2,2199.864130  
14,2,2478.447222  
14,2,3843.848485  
14,2,3145.217500  
14,2,2527.356383  
14,2,1669.854167  
14,2,1558.560000  
14,2,8615.058824  
14,2,1571.978723  
14,2,4329.406250  
14,2,1633.941176  
14,2,5531.985294  
14,2,3153.074519  
14,2,1746.817073  
14,2,2516.881579  
14,2,2684.737143  
14,2,1508.105263

14,2,1662.062802  
15,1,2240.075000  
15,1,1774.191176  
15,1,5361.421053  
15,1,6550.850000  
15,1,2002.857143  
15,1,2085.483974  
15,1,4462.371951  
15,1,2427.733333  
15,1,3900.848214  
15,1,3527.911765  
15,1,2238.793269  
15,1,3089.316176  
15,1,1621.750000  
15,1,3846.739130  
15,1,2888.970588  
15,1,1845.087500  
15,1,3245.562500  
15,1,5109.853723  
15,1,2549.320652  
15,1,4818.870968  
15,1,4492.701754  
15,1,1812.246622  
15,1,1886.457317  
15,1,12216.013514  
15,1,3387.046875  
15,1,3016.319079  
15,1,2022.344512  
15,1,2001.419847  
15,1,1909.130682  
15,1,1698.755208  
15,1,1892.100000  
15,1,2933.718750  
15,1,2974.761905  
15,1,4908.790816  
15,1,2040.666667  
15,1,16347.875000  
15,1,14193.364286  
15,1,1800.222222  
15,1,2578.062500  
15,1,4286.333333  
15,1,11351.886905  
15,1,3259.155488  
15,1,4246.828125  
15,1,5300.153846  
15,1,4885.750000  
15,1,2583.227941  
15,1,5053.500000  
15,1,4961.840426  
15,1,6644.687500  
15,1,8981.500000  
15,1,3130.996575  
15,1,1846.933511  
15,1,4525.176471  
15,1,3309.600000  
15,1,6499.468750  
15,1,4241.780488  
15,1,4938.377778  
15,1,5423.191176  
15,1,10190.116279  
15,1,11099.819853  
15,1,5646.056548  
15,1,1812.822368  
15,1,2342.725000  
15,1,2548.469388  
15,1,6647.885714

15,1,4420.317073  
15,1,4531.663043  
15,1,1598.208333  
15,1,4217.320513  
15,1,2173.407500  
15,1,6278.513158  
15,1,2470.602941  
15,1,2895.236111  
15,1,3584.625000  
15,1,1632.155488  
15,1,5843.390625  
15,1,2184.225000  
15,1,1507.066406  
15,1,2370.565476  
15,1,1540.472222  
15,1,1645.287500  
15,1,3274.125000  
15,1,1561.867188  
15,1,2568.010714  
15,1,3739.181818  
15,1,5851.475610  
15,1,2256.361111  
15,1,1640.437500  
15,1,1873.617647  
15,1,1618.894737  
15,1,9826.964744  
15,1,2318.317308  
15,1,5822.952703  
15,1,2270.745509  
15,1,2840.194767  
15,1,1805.642857  
15,1,2046.222973  
15,1,6867.973684  
15,1,9985.395833  
15,1,8481.086735  
15,1,12245.270833  
15,1,3845.250000  
15,1,3176.317073  
15,1,2145.401163  
15,1,3645.584135  
15,1,3335.500000  
15,1,7632.659091  
15,1,2961.650000  
15,1,9644.049242  
15,1,4169.384615  
15,1,6126.839744  
15,1,2994.092857  
15,1,1578.965625  
15,1,9779.107955  
15,1,1624.279412  
15,1,4321.573171  
15,1,7027.596154  
15,1,2278.205357  
15,1,7623.303571  
15,1,12159.647727  
15,1,17778.596154  
15,1,3678.060976  
15,1,12441.705128  
15,1,4320.509615  
15,1,3485.985294  
15,1,1668.147436  
15,1,16895.548913  
15,1,1521.375000  
15,1,3801.127907  
15,1,4034.789062  
15,1,13362.250000

15,1,3250.534091  
15,1,3262.847826  
15,1,5495.769231  
15,1,2028.684211  
15,1,4865.500000  
15,1,2057.000000  
15,1,2853.690476  
15,1,3021.823171  
15,1,4651.045732  
15,1,11848.093750  
15,1,11908.020833  
15,1,10282.320000  
15,1,2288.625000  
15,1,7616.695000  
15,1,6291.800000  
15,1,6418.170732  
15,1,14614.714286  
15,1,4953.769231  
15,1,2722.520270  
15,1,3453.375000  
15,1,5903.842105  
15,1,5141.163462  
15,1,9285.909091  
15,1,1974.034884  
15,1,2816.281250  
15,1,1924.237805  
15,1,2593.500000  
15,1,17694.750000  
15,1,15023.324324  
15,1,1669.776786  
15,1,1893.500000  
15,1,7569.800595  
15,1,1951.161765  
15,1,2654.943396  
15,1,3059.877358  
15,1,3702.244681  
15,1,15026.963889  
15,1,1730.930147  
15,1,3190.098404  
15,1,8642.324405  
15,1,3898.562500  
15,1,3491.022727  
15,1,2324.595588  
15,1,5375.230114  
15,1,3706.250000  
15,1,3909.095745  
15,1,6715.884146  
15,1,1636.100610  
15,1,1599.128676  
15,1,2352.255000  
15,1,4830.302326  
15,1,4519.055556  
15,1,4100.348404  
15,1,1906.800000  
15,1,6951.000000  
15,1,1647.459459  
15,1,5181.300000  
15,1,8658.687500  
15,1,3731.663043  
15,1,2471.926471  
15,1,11927.435897  
15,1,8634.434211  
15,1,1543.148649  
15,1,4567.982143  
15,1,1851.096774  
15,1,1712.111842

15,1,9045.025000  
15,1,1733.994048  
15,1,2116.075000  
15,1,6825.023256  
15,1,6578.453804  
15,1,6720.786765  
15,1,4442.886905  
15,1,7680.155405  
15,1,2442.861111  
15,1,5239.292553  
15,1,6023.332317  
15,1,1539.069767  
15,1,15401.454545  
15,1,4977.023810  
15,1,2845.701220  
15,1,15478.571429  
15,1,1646.402778  
15,1,17037.187500  
15,1,1563.815476  
15,1,4468.500000  
15,1,6742.696078  
15,1,6827.101562  
15,1,4996.500000  
15,1,6486.160714  
15,1,2913.544872  
15,1,1953.709677  
15,1,5277.142857  
15,1,1829.392857  
15,1,8392.615385  
15,1,2333.013889  
15,1,10694.163793  
15,1,15223.034483  
15,1,2405.400510  
15,1,8952.645000  
15,1,4394.639706  
15,1,3879.518519  
15,1,1510.614362  
15,1,3712.772059  
15,1,19630.209302  
15,1,14012.467742  
15,1,2669.613095  
15,1,2228.145833  
15,1,16332.195652  
15,1,3125.035256  
15,1,2412.304054  
15,1,2653.705128  
15,1,1713.238095  
15,1,4202.833333  
15,1,2527.858974  
15,1,5764.528571  
15,1,6825.621795  
15,1,1627.725000  
15,1,5251.500000  
15,1,3614.384615  
15,1,14295.095588  
15,1,2780.378125  
15,1,2165.857143  
15,1,1552.823980  
15,1,8580.531250  
15,1,2309.000000  
15,1,4034.934783  
15,1,1546.600000  
15,1,1631.865385  
15,1,1559.258929  
15,1,6409.705128  
15,1,2576.567073

15,1,3058.015625  
15,1,5103.720238  
15,1,4231.031250  
15,1,2638.761905  
15,1,4598.750000  
15,1,17343.562500  
15,1,1713.162879  
15,1,12466.414634  
15,1,5647.000000  
15,1,4080.500000  
15,1,3573.864865  
15,1,2670.878378  
15,1,1517.928571  
15,1,2212.861607  
15,1,5016.913462  
15,1,5862.156250  
15,1,7805.510204  
15,1,4064.150735  
15,1,4131.951923  
15,1,15524.500000  
15,1,4655.135135  
15,1,1517.357558  
15,1,7109.468750  
15,1,2104.323171  
15,1,1926.125000  
15,1,18646.878676  
15,1,8311.838235  
15,1,2001.000000  
15,1,3505.487805  
15,1,11520.358333  
15,1,1819.918919  
15,1,1623.991848  
15,1,13125.078125  
15,1,2117.511029  
15,1,1858.816176  
15,1,3944.976190  
15,1,5051.012931  
15,1,5727.262500  
15,1,11927.402439  
15,1,5126.077586  
15,1,3065.864286  
15,1,9810.763889  
15,1,2001.150000  
15,1,14261.083333  
15,1,4428.512500  
15,1,2097.466216  
15,1,2506.125000  
15,1,9415.401786  
15,1,5156.039474  
15,1,1762.156250  
15,1,2386.482759  
15,1,13707.906250  
15,1,1816.887195  
15,1,2724.220588  
15,1,1521.864865  
15,1,4432.196970  
15,1,4597.642857  
15,1,1548.901596  
15,1,3717.085106  
15,1,3808.756579  
15,1,17016.230769  
15,1,2526.666667  
15,1,2224.500000  
15,1,2731.959184  
15,1,2354.781250  
15,1,4323.542614

15,1,19788.750000  
15,1,5745.669118  
15,1,14547.437500  
15,1,18435.926471  
15,1,2869.616667  
15,1,3027.554348  
15,1,6836.865854  
15,1,2504.844595  
15,1,4763.622159  
15,1,3197.968750  
15,1,6391.310345  
15,1,2252.421429  
15,1,2153.586538  
15,1,2340.937500  
15,1,1764.102564  
15,1,5702.092105  
15,1,2147.670455  
15,1,8431.229167  
15,1,1620.471429  
15,1,9546.725000  
15,1,1905.577778  
15,1,3473.274457  
15,1,3681.625000  
15,1,5461.758721  
15,1,2682.034884  
15,1,10176.182692  
15,1,7571.956731  
15,1,7401.500000  
15,1,12133.666667  
15,1,1581.437500  
15,1,2440.658784  
15,1,10410.347656  
15,1,6937.280303  
15,1,14922.238095  
15,1,3023.220000  
15,1,4128.104651  
15,1,1584.795455  
15,1,3421.309211  
15,1,6848.947368  
15,1,2229.679348  
15,1,1971.571970  
15,1,3465.750000  
15,1,1907.695652  
15,1,2892.215517  
15,1,11672.382812  
15,1,2438.320513  
15,1,1771.312500  
15,1,3025.972973  
15,1,3382.375000  
15,1,3775.522222  
15,1,8872.554878  
15,1,10018.913462  
15,1,5988.263158  
15,1,2281.000000  
15,1,6145.453804  
15,1,1748.473214  
15,1,1778.163265  
15,1,3604.940789  
15,1,16781.500000  
15,1,2789.303571  
15,1,3088.243243  
15,1,2621.857143  
15,1,6348.160000  
15,1,1743.375000  
15,1,1984.170455  
15,1,1864.675000

15,1,1717.735294  
15,1,5106.735294  
15,1,6018.843750  
15,1,1705.018750  
15,1,4478.154762  
15,1,1956.969512  
15,1,18343.821429  
15,1,2684.940341  
15,1,9460.878049  
15,1,2736.913462  
15,1,7261.279070  
15,1,3340.000000  
15,1,1871.539773  
15,1,2424.416667  
15,1,1847.031250  
15,1,1727.781250  
15,1,1965.833333  
15,1,1654.256410  
15,1,5653.333333  
15,1,2398.882353  
15,1,1729.875000  
15,1,12067.008929  
15,1,5435.345745  
15,1,1504.279070  
15,1,7064.978261  
15,1,2755.828571  
15,1,8845.340517  
15,1,5533.468085  
15,1,10481.391304  
15,1,17602.000000  
15,1,1720.057143  
15,1,2204.829268  
15,1,10091.500000  
15,1,4987.250000  
15,1,14509.536458  
15,1,1776.420213  
15,1,3235.923077  
15,1,4630.700000  
15,1,3766.509375  
15,1,1804.239796  
15,1,1947.388889  
15,1,1932.428571  
15,1,2457.864286  
15,1,1854.893382  
15,1,1899.985294  
15,1,4070.151515  
15,1,15481.815789  
15,1,7598.276316  
15,1,2074.632500  
15,1,13747.540625  
15,1,5102.863636  
15,1,17731.260000  
15,1,12077.435811  
15,1,3540.800000  
15,1,13484.262500  
15,1,4816.962264  
15,1,1706.540541  
15,1,10687.228723  
15,1,1838.898438  
15,1,3715.254808  
15,1,1843.898438  
15,1,6016.722973  
15,1,4320.352500  
15,1,8074.930147  
15,1,1587.316176  
15,1,2826.322581

15,1,2787.683673  
15,1,5052.235294  
15,1,4653.286765  
15,1,3294.147222  
15,1,6586.062500  
15,1,3572.042683  
15,1,1844.264706  
15,1,2083.766447  
15,1,1767.500000  
15,1,1874.088415  
15,1,5779.842391  
15,1,2621.400000  
15,1,5375.000000  
15,1,2122.548780  
15,1,1955.536585  
15,1,2204.436170  
15,1,1989.437500  
15,1,10121.000000  
15,1,1588.787500  
15,1,2622.050000  
15,1,1795.250000  
15,1,2029.078571  
15,1,1925.967742  
15,1,12079.875000  
15,1,9226.205128  
15,1,7652.200000  
15,1,8251.351852  
15,1,12643.968750  
15,1,1599.323529  
15,1,2095.542683  
15,1,2101.234043  
15,1,7568.826087  
15,1,3069.160714  
15,1,5221.666667  
15,1,2036.925000  
15,1,1951.078125  
15,1,1759.921875  
15,1,3671.985714  
15,1,1630.437500  
15,1,10097.523256  
15,1,4345.888889  
15,1,5347.743902  
15,1,3984.761029  
15,1,3667.250000  
15,1,1596.548780  
15,1,2974.875000  
15,1,5334.128571  
15,1,18118.882353  
15,1,13154.715909  
15,1,8846.585714  
15,1,3439.650000  
15,1,2111.000000  
15,1,4684.875000  
15,1,2832.730769  
15,1,5112.330882  
15,1,10024.344512  
15,1,7056.324324  
15,1,2512.723404  
15,1,1966.250000  
15,1,4827.713889  
15,1,7436.685185  
15,1,2515.164634  
15,1,18680.600000  
15,1,7252.089286  
15,1,2278.111111  
15,1,5935.000000

15,1,6127.692308  
15,1,4135.466216  
15,1,1946.568182  
15,1,8301.658537  
15,1,3572.216216  
15,1,1567.029412  
15,1,11686.804878  
15,1,2937.769231  
15,1,3017.125000  
15,1,2178.400000  
15,1,1607.955357  
15,1,8351.708333  
15,1,9017.464286  
15,1,4251.281250  
15,1,6162.618590  
15,1,3300.212766  
15,1,5388.059659  
15,1,2208.898810  
15,1,1549.622549  
15,1,5498.979167  
15,1,1740.140625  
15,1,2014.274390  
15,1,1802.984375  
15,1,4113.627907  
15,1,1594.135714  
15,1,12978.941176  
15,1,4968.896552  
15,1,2708.408537  
15,1,4179.803571  
15,1,18056.223684  
15,1,10446.948276  
15,1,2491.494681  
15,1,3040.968750  
15,1,5845.513298  
15,1,4597.750000  
15,1,1711.761111  
15,1,7215.221154  
15,1,2260.048077  
15,1,1507.476744  
15,1,1541.385204  
15,1,1843.568182  
15,1,14902.690476  
15,1,1906.342105  
15,1,2607.466216  
15,1,1610.423469  
15,1,6511.785714  
15,1,3186.625000  
15,1,5416.886029  
15,1,5629.599265  
15,1,5476.500000  
15,1,2774.571970  
15,1,1523.680556  
15,1,6300.754717  
15,1,2536.218750  
15,1,2161.641129  
15,1,3295.011628  
15,1,3284.465625  
15,1,1646.357143  
15,1,9353.361842  
15,1,6177.046875  
15,1,4782.717277  
15,1,9970.600000  
15,1,4657.500000  
15,1,7035.723404  
15,1,17049.907609  
15,1,2669.800000

15,1,4773.875000  
15,1,1903.517857  
15,1,4077.028571  
15,1,4334.229167  
15,1,7229.687500  
15,1,4852.923077  
15,1,5770.467742  
15,1,2523.069767  
15,1,9707.948718  
15,1,1553.236111  
15,1,2460.692308  
15,1,6326.772727  
15,1,5856.636905  
15,1,6074.907609  
15,1,5412.538462  
15,1,2479.954545  
15,1,1668.487500  
15,1,2814.750000  
15,1,3563.166667  
15,1,2317.756250  
15,1,4547.574405  
15,1,14858.333333  
15,1,2435.794118  
15,1,2204.562500  
15,1,6568.871212  
15,1,2485.782500  
15,1,1688.715625  
15,1,6751.250000  
15,1,3097.331522  
15,1,2314.209302  
15,1,3403.470588  
15,1,3512.794118  
15,1,1560.743750  
15,1,8829.000000  
15,1,11886.903846  
15,1,6527.784574  
15,1,2604.200000  
15,1,2463.579082  
15,1,3271.365132  
15,1,18762.829268  
15,1,12446.137931  
15,1,2757.523810  
15,1,2988.317308  
15,1,4387.891667  
15,1,1880.287500  
15,1,1996.961538  
15,1,2402.384615  
15,1,1764.490741  
15,1,2742.672078  
15,1,2660.212766  
15,1,2574.571429  
15,1,1823.083333  
15,1,1986.872340  
15,1,8509.161290  
15,1,2022.769697  
15,1,4331.053571  
15,1,2207.265625  
15,1,3206.656250  
15,1,1866.000000  
15,1,3064.201613  
15,1,6229.502976  
15,1,7923.246951  
15,1,12231.142857  
15,1,5271.513158  
15,1,2540.322917  
15,1,1523.750000

15,1,3006.250000  
15,1,1595.750000  
15,1,8821.164286  
15,1,2738.906250  
15,1,3072.161765  
15,1,7672.562500  
15,1,4254.221875  
15,1,1757.419872  
15,1,2775.690789  
15,1,3724.384615  
15,1,2096.263587  
15,1,2019.603659  
15,1,4138.793750  
15,1,4217.606707  
15,1,5031.722561  
15,1,4677.130952  
15,1,4472.769231  
15,1,6802.180556  
15,1,4186.625000  
15,1,1666.414894  
15,1,18864.173077  
15,1,1939.414474  
15,1,2131.271739  
15,1,9046.618750  
15,1,4205.600000  
15,1,3335.708333  
15,1,2337.700000  
15,1,4060.773810  
15,1,2684.133333  
15,1,1879.125000  
15,1,2147.182692  
15,1,1645.705128  
15,1,3204.693878  
15,1,7533.918367  
15,1,3742.396341  
15,1,9496.483333  
15,1,2530.708333  
15,1,16868.470588  
15,1,2341.596154  
15,1,4670.926471  
15,1,1881.962500  
15,1,3726.391304  
15,1,1973.575658  
15,1,2250.145270  
15,1,9341.512195  
15,1,3270.500000  
15,1,8444.750000  
15,1,1845.668750  
15,1,17935.303030  
15,1,2829.800000  
15,1,16197.125000  
15,1,3834.921875  
15,1,3121.788043  
15,1,2115.790698  
15,1,1501.972222  
15,1,5682.833333  
15,1,1595.060976  
15,1,3567.343750  
15,1,1602.000000  
15,1,4369.657609  
15,1,4128.775000  
15,1,10409.444444  
15,1,4057.870370  
15,1,1981.323718  
15,1,2463.195122  
15,1,1795.000000

15,1,8557.182065  
15,1,9320.833333  
15,1,2558.083333  
15,1,17818.137500  
15,1,2991.216912  
15,1,6146.307692  
15,1,13631.815972  
15,1,4694.651163  
15,1,3431.243902  
15,1,5543.659884  
15,1,5295.022727  
15,1,6631.625000  
15,1,2845.081522  
15,1,8435.713235  
15,1,1806.936047  
15,1,8650.525000  
15,1,2191.612179  
15,1,4259.774457  
15,1,2868.144231  
15,1,14513.252778  
15,1,1601.310606  
15,1,16522.900000  
15,1,3222.154605  
15,1,3777.573529  
15,1,3158.488095  
15,1,1745.301136  
15,1,1717.511364  
15,1,2970.583333  
15,1,1790.539773  
15,1,2522.253378  
15,1,3319.226190  
15,1,3849.756098  
15,1,1550.221591  
15,1,3494.215517  
15,1,2850.500000  
15,1,11739.083333  
15,1,18967.333333  
15,1,2003.187500  
15,1,2774.050000  
15,1,15453.928571  
15,1,1880.090909  
15,1,7745.824324  
15,1,5245.958333  
15,1,4234.714286  
15,1,10120.642857  
15,1,5328.813830  
15,1,1831.292683  
15,1,6614.491935  
15,1,12703.282258  
15,1,2007.391304  
15,1,5824.036765  
15,1,5188.517857  
15,1,2630.097561  
15,1,17132.416667  
15,1,2283.106771  
15,1,2505.081395  
15,1,1725.142857  
15,1,5427.272727  
15,1,4904.580882  
15,1,2515.625000  
15,1,1715.710938  
15,1,8421.027778  
15,1,6992.256579  
15,1,3139.270270  
15,1,3020.000000  
15,1,4891.172414

15,1,2264.250000  
15,1,3630.948718  
15,1,1614.335366  
15,1,10178.750000  
15,1,1946.186111  
15,1,12312.148148  
15,1,3280.718750  
15,1,4517.928571  
15,1,2073.590426  
15,1,5837.500000  
15,1,3750.236486  
15,1,7889.691406  
15,1,6979.760417  
15,1,2082.708333  
15,1,3157.573171  
15,1,17636.302632  
15,1,2581.933511  
15,1,6411.913690  
15,1,3850.260870  
15,1,2381.235119  
15,1,1786.795455  
15,1,2182.125000  
15,1,11413.986842  
15,1,6394.597656  
15,1,16798.076923  
15,1,18181.629310  
15,1,11118.378378  
15,1,4203.252976  
15,1,1803.541667  
15,1,2859.350962  
15,1,19723.630952  
15,1,12131.928125  
15,1,2147.782051  
15,1,6182.700000  
15,1,4869.835366  
15,1,14381.967105  
15,1,5914.992857  
15,1,5979.384146  
15,1,9591.331250  
15,1,4941.822368  
15,1,3642.985294  
15,1,14134.479730  
15,1,4573.922872  
15,1,1996.194444  
15,1,9527.682927  
15,1,1547.938889  
15,1,1602.516509  
15,1,2157.384615  
15,1,8564.841463  
15,1,4390.750000  
15,1,3703.184211  
15,1,3606.875000  
15,1,3093.992188  
15,1,1620.500000  
15,1,1914.803977  
15,1,2845.321429  
15,1,8849.159091  
15,1,13898.807692  
15,1,8963.625000  
15,1,7607.782738  
15,1,3398.166667  
15,1,3092.500000  
15,1,2429.393939  
15,1,6995.077830  
15,1,3030.021277  
15,1,2741.706081

15,1,2052.958333  
15,1,19765.548387  
15,1,3248.025735  
15,1,1523.403125  
15,1,3944.011029  
15,1,6287.326923  
15,1,5335.005952  
15,1,10762.072581  
15,1,3443.152778  
15,1,7259.700000  
15,1,5382.512500  
15,1,2216.362500  
15,1,11023.733696  
15,1,3699.934211  
15,1,3692.297619  
15,1,1560.615385  
15,1,6023.823529  
15,1,1779.282051  
15,1,2723.125000  
15,1,2783.768293  
15,1,8552.090909  
15,1,1529.937500  
15,1,2121.906250  
15,1,3613.000000  
15,1,9706.087963  
15,1,1651.250000  
15,1,2118.839286  
15,1,3186.923077  
15,1,8306.792857  
15,1,2856.105263  
15,1,10095.395161  
15,1,7745.755952  
15,1,5422.215426  
15,1,5441.444079  
15,1,3829.756281  
15,1,9766.382353  
15,1,3923.200000  
15,1,14005.712500  
15,1,12765.479730  
15,1,3840.809524  
15,1,2029.345238  
15,1,5049.284722  
15,1,1661.335366  
15,1,1835.443182  
15,1,1698.897436  
15,1,3543.321429  
15,1,4430.707317  
15,1,2081.264535  
15,1,2048.000000  
15,1,1512.103448  
15,1,1914.770349  
15,1,2303.000000  
15,1,1749.825000  
15,1,2301.234694  
15,1,6616.928571  
15,1,3471.666667  
15,1,5930.003676  
15,1,1775.127717  
15,1,8952.101351  
15,1,3372.794118  
15,1,4746.571429  
15,1,14136.277778  
15,1,11101.500000  
15,1,1851.807692  
15,1,1889.628125  
15,1,6690.952381

15,1,11614.403226  
15,1,5481.921875  
15,1,10311.902778  
15,1,2282.781250  
15,1,12127.307143  
15,1,11709.909091  
15,1,4689.906250  
15,1,5895.650000  
15,1,2361.622024  
15,1,5673.428571  
15,1,4036.132353  
15,1,6699.539634  
15,1,6864.770270  
15,1,3237.109375  
15,1,11053.872093  
15,1,4934.085366  
15,1,6926.102564  
15,1,1729.846154  
15,1,2848.500000  
15,1,1648.974359  
15,1,2136.631579  
15,1,2401.959559  
15,1,11808.312500  
15,1,3822.125000  
15,1,1821.483871  
15,1,1930.939024  
15,1,10646.517857  
15,1,11318.428571  
15,1,2803.364130  
15,1,5682.784375  
15,1,2593.307292  
15,1,5053.242188  
15,1,1512.602941  
15,1,3680.121622  
15,1,9442.052083  
15,1,1889.067073  
15,1,2842.961538  
15,1,3920.723214  
15,1,1890.128571  
15,1,2224.861111  
15,1,2897.256410  
15,1,6695.318750  
15,1,5599.807692  
15,1,12724.636029  
15,1,1597.470930  
15,1,7241.470588  
15,1,2827.138889  
15,1,1628.837209  
15,1,7382.727273  
15,1,5602.390244  
15,1,5552.318182  
15,1,3195.758523  
15,1,3703.218750  
15,1,2763.720745  
15,1,13673.428571  
15,1,3371.714286  
15,1,3236.077128  
15,1,3295.058140  
15,1,8288.910714  
15,1,4497.258065  
15,1,9147.274390  
15,1,9379.542857  
15,1,4384.286585  
15,1,3270.295918  
15,1,16367.187500  
15,1,2479.268229

15,1,2752.227941  
15,1,13370.845109  
15,1,2853.741071  
15,1,2896.825000  
15,1,2554.717949  
15,1,12807.495000  
15,1,6405.857143  
15,1,2293.957317  
15,1,1781.500000  
15,1,6100.385638  
15,1,5800.809524  
15,1,2209.432065  
15,1,4798.643939  
15,1,1909.071429  
15,1,1662.534722  
15,1,1956.758333  
15,1,19001.463415  
15,1,11615.319853  
15,1,1554.225000  
15,1,4139.344512  
15,1,5550.000000  
15,1,14878.452830  
15,1,3972.000000  
15,1,5023.316176  
15,1,1834.357143  
15,1,3235.162500  
15,1,3377.551020  
15,1,1981.574074  
15,1,8730.237500  
15,1,1838.404412  
15,1,6430.009868  
15,1,14009.160714  
15,1,5859.032895  
15,1,5041.146552  
15,1,1805.166667  
15,1,10275.197917  
15,1,6314.325000  
15,1,3491.002976  
15,1,1501.189024  
15,1,1567.338542  
15,1,7057.259615  
15,1,8577.500000  
15,1,3743.023649  
15,1,9892.606383  
15,1,8393.141026  
15,1,5724.323529  
15,1,5753.823529  
15,1,4177.202703  
15,1,2273.843750  
15,1,15984.297872  
15,1,1611.723684  
15,1,1650.959184  
15,1,3545.760736  
15,1,2401.951220  
15,1,2331.205556  
15,1,10334.345109  
15,1,4604.448718  
15,1,1891.269231  
15,1,4936.406250  
15,1,10982.236842  
15,1,5326.425000  
15,1,19534.925532  
15,1,5459.350694  
15,1,1630.234043  
15,1,1588.216463  
15,1,2235.827128

15,1,2662.052632  
15,1,4873.000000  
15,1,1550.597222  
15,1,4624.203390  
15,1,2661.246324  
15,1,4341.598404  
15,1,2008.666667  
15,1,3593.414062  
15,1,1503.410256  
15,1,5234.271875  
15,1,6180.152439  
15,1,14035.878378  
15,1,3995.854167  
15,1,5922.221591  
15,1,2759.550000  
15,1,2671.128049  
15,1,4344.884375  
15,1,3944.219697  
15,1,4545.171875  
15,1,2264.109043  
15,1,2180.371795  
15,1,1970.021739  
15,1,1608.588235  
15,1,3509.500000  
15,1,2174.750000  
15,1,1506.000000  
15,1,3299.333333  
15,1,2726.150000  
15,1,2812.298611  
15,1,1552.973684  
15,1,1868.083333  
15,1,2200.954545  
15,1,2042.306250  
15,1,4019.494186  
15,1,3771.212838  
15,1,2809.091463  
15,1,5383.709239  
15,1,6935.611111  
15,1,10766.272727  
15,1,1822.125000  
15,1,3708.782609  
15,1,2561.511364  
15,1,1561.450000  
15,1,6402.094697  
15,1,3835.427419  
15,1,9898.812500  
15,1,1670.418605  
15,1,3206.923077  
15,1,7769.546875  
15,1,3194.372340  
15,1,7251.043605  
15,1,4048.062500  
15,1,9079.750000  
15,1,3592.458333  
15,1,14894.707317  
15,1,1967.306250  
15,1,2422.833333  
15,1,2179.320755  
15,1,8848.488636  
15,1,1730.064516  
15,1,1556.708333  
15,1,2456.494318  
15,1,4440.953125  
15,1,3675.698529  
15,1,3359.468750  
15,1,3887.644444

15,1,2694.689024  
15,1,8739.793103  
15,1,6241.455357  
15,1,8874.878676  
15,1,6588.627907  
15,1,6421.066667  
15,1,8159.621795  
15,1,3870.943750  
15,1,3821.213415  
15,1,5456.447115  
15,1,2037.323529  
15,1,1787.349432  
15,1,1784.453947  
15,1,1651.000000  
15,1,6618.000000  
15,1,1560.771429  
15,1,2031.791667  
15,1,2346.509868  
15,1,9831.696429  
15,1,1600.750000  
15,1,5398.911765  
15,1,2843.597973  
15,1,12077.272436  
15,1,1878.432927  
15,1,1795.928571  
15,1,3535.543750  
15,1,6706.041667  
15,1,6442.000000  
15,1,3966.185484  
15,1,2550.212500  
15,1,15861.416667  
15,1,2629.243243  
15,1,3916.750000  
15,1,17263.471154  
15,1,3342.759615  
15,1,3177.578125  
15,1,1761.305000  
15,1,13335.842857  
15,1,12763.496094  
15,1,8581.600543  
15,1,4090.106061  
15,1,2628.268293  
15,1,1845.083333  
15,1,3153.115625  
15,1,2118.377778  
15,1,4326.726974  
15,1,2792.945122  
15,1,6171.595238  
15,1,5810.113095  
15,1,10391.977778  
15,1,8787.835938  
15,1,2020.333333  
15,1,4561.010204  
15,1,2938.809783  
15,1,2447.880208  
15,1,2343.937500  
15,1,4539.060811  
15,1,2955.770161  
15,1,1794.350000  
15,1,4196.773810  
15,1,1905.045732  
15,1,1874.337500  
15,1,2060.364583  
15,1,11484.779412  
15,1,2783.677083  
15,1,2477.035714

15,1,1991.558824  
15,1,2514.552885  
15,1,5495.290816  
15,1,2226.125000  
15,1,1921.330556  
15,1,3051.521277  
15,1,3202.400000  
15,1,3515.416667  
15,1,2873.250000  
15,1,11371.747449  
15,1,3859.461538  
15,1,6316.632812  
15,1,6948.670139  
15,1,4569.352273  
15,1,5075.895161  
15,1,3715.605556  
15,1,3082.592105  
15,1,15754.727941  
15,1,2149.909091  
15,1,3288.073864  
15,1,2068.530612  
15,1,4751.780000  
15,1,5986.421053  
15,1,2127.801136  
15,1,2012.464674  
15,1,6773.180556  
15,1,4482.329545  
15,1,7951.941176  
15,1,3024.428571  
15,1,1715.664474  
15,1,12600.682692  
15,1,1880.397727  
15,1,2547.704545  
15,1,3159.000000  
15,1,2372.368750  
15,1,2044.183673  
15,1,7430.058140  
15,1,3442.640625  
15,1,2288.412736  
15,1,4920.841463  
15,1,7923.280303  
15,1,1694.697368  
15,1,16610.055556  
15,1,5943.697368  
15,1,2682.970588  
15,1,3566.875000  
15,1,1684.593023  
15,1,2598.108553  
15,1,4918.102041  
15,1,9857.404762  
15,1,3981.964286  
15,1,3167.609756  
15,1,3719.988889  
15,1,1533.000000  
15,1,3399.986413  
15,1,5084.631579  
15,1,12683.166667  
15,1,3245.437500  
15,1,5298.285714  
15,1,3160.541667  
15,1,8506.829268  
15,1,1806.395833  
15,1,2342.364583  
15,1,5766.240625  
15,1,3140.397059  
15,1,5767.671053

15,1,5638.000000  
15,1,1996.128049  
15,1,3397.911765  
15,1,16452.968085  
15,1,1625.833333  
15,1,4561.714286  
15,1,4590.592391  
15,1,19393.058824  
15,1,1917.331250  
15,1,2391.293605  
15,1,4241.355556  
15,1,3200.334459  
15,1,2641.021429  
15,1,4976.169118  
15,1,1688.657609  
15,1,1618.246212  
15,1,2153.867647  
15,1,3072.011628  
15,1,2953.517857  
15,1,5878.301136  
15,1,2684.295455  
15,1,2268.875000  
15,1,2402.785714  
15,1,1868.015625  
15,1,2514.928571  
15,1,1773.019231  
15,1,2202.925000  
15,1,6615.628205  
15,1,4596.703125  
15,1,3743.953125  
15,1,10046.246875  
15,1,8689.161765  
15,1,2459.900000  
15,1,4299.218750  
15,1,4935.625000  
15,1,4854.614286  
15,1,4890.104167  
15,1,1673.521739  
15,1,2273.428571  
15,1,7762.500000  
15,1,2490.181818  
15,1,10956.500000  
15,1,4882.464844  
15,1,6756.589286  
15,1,10458.375000  
15,1,2629.803571  
15,1,5404.200000  
15,1,4927.990385  
15,1,6614.785714  
15,1,1894.125000  
15,1,3244.833333  
15,1,2759.982759  
15,1,5264.757353  
15,1,2290.752976  
15,1,4519.173077  
15,1,3782.814103  
15,1,12998.358553  
15,1,1939.515244  
15,1,4896.855769  
15,1,4066.524390  
15,1,3234.428571  
15,1,3051.596429  
15,1,8396.410714  
15,1,13639.732558  
15,1,3688.595395  
15,1,2661.308824

15,1,1777.847561  
15,1,2588.926471  
15,1,5516.267857  
15,1,3471.406250  
15,1,1914.888158  
15,1,13393.191489  
15,1,8053.714286  
15,1,11295.576923  
15,1,7034.040441  
15,1,16783.477941  
15,1,8445.343750  
15,1,2162.750000  
16,2,2721.502841  
16,2,2128.769737  
16,2,1749.875000  
16,2,2547.596154  
16,2,1537.893617  
16,2,2671.690000  
16,2,2875.678125  
16,2,2291.238095  
16,2,1910.867788  
16,2,1873.601744  
16,2,4743.250000  
16,2,1968.737805  
16,2,1591.412791  
16,2,2934.175481  
16,2,2335.012755  
16,2,2198.710000  
16,2,1751.429348  
16,2,1589.564516  
16,2,1873.613095  
16,2,1798.400000  
16,2,5023.440000  
16,2,2944.125000  
16,2,2189.444444  
16,2,1865.597561  
16,2,1629.600000  
16,2,1700.435811  
16,2,2076.820312  
16,2,1925.934211  
16,2,1691.008152  
16,2,1716.000000  
16,2,2363.477941  
16,2,1739.828947  
16,2,2779.729167  
16,2,1685.225000  
16,2,2072.621711  
16,2,1552.210784  
16,2,1604.394737  
16,2,1940.843750  
16,2,1813.635870  
16,2,2619.192857  
16,2,2682.534375  
16,2,2414.050000  
16,2,2062.488889  
16,2,1767.145833  
16,2,2449.350877  
16,2,1547.350000  
16,2,1789.769737  
16,2,2774.771277  
16,2,1566.500000  
16,2,2229.331395  
16,2,3640.575000  
16,2,2172.812500  
16,2,6090.735849  
16,2,2269.000000

16,2,1749.936170  
16,2,1661.533333  
16,2,1957.816489  
16,2,1566.395833  
16,2,2148.079082  
16,2,1681.478261  
16,2,1945.312500  
16,2,1829.825893  
16,2,2532.250000  
16,2,2034.521226  
16,2,1632.317500  
16,2,2939.925926  
16,2,1737.710526  
16,2,2554.632159  
16,2,2282.028409  
16,2,4809.959302  
16,2,1579.119048  
16,2,1658.938889  
16,2,3522.511111  
16,2,3378.168367  
16,2,1966.382353  
16,2,2322.080882  
16,2,3349.794776  
16,2,1941.521429  
16,2,6079.165323  
16,2,2721.875000  
16,2,2002.015625  
16,2,2068.561404  
16,2,2004.612903  
16,2,1557.778302  
16,2,2311.295455  
16,2,5134.416667  
16,2,1547.351974  
16,2,2947.270000  
16,2,2290.852941  
16,2,3162.548913  
16,2,1783.744792  
16,2,2155.732143  
16,2,2497.093750  
16,2,1591.875000  
16,2,2243.583333  
16,2,5270.842308  
16,2,8001.464286  
16,2,1724.434524  
16,2,1604.709302  
16,2,2011.833333  
16,2,1754.500000  
16,2,3638.690789  
16,2,2999.796296  
16,2,2514.015152  
16,2,1675.795000  
16,2,1824.533019  
16,2,2644.090909  
16,2,1806.147059  
16,2,1585.750000  
16,2,1738.845930  
16,2,2625.177500  
16,2,2555.627551  
16,2,4882.954545  
16,2,2877.437500  
16,2,3218.951923  
16,2,2142.845930  
16,2,1606.960000  
16,2,1538.361413  
16,2,1894.367188  
16,2,1824.761111

16,2,1866.031915  
16,2,1715.250000  
16,2,6940.625000  
16,2,3892.596354  
16,2,1980.234043  
16,2,1505.808511  
16,2,1888.560000  
16,2,8125.750000  
16,2,1840.400000  
16,2,1978.362245  
16,2,2180.760870  
16,2,2552.850000  
16,2,1537.916667  
16,2,1950.340426  
16,2,2293.250000  
16,2,1797.413265  
16,2,1962.027778  
16,2,1727.779412  
16,2,3436.208333  
16,2,1625.473837  
16,2,3149.815789  
16,2,2763.800000  
16,2,1715.769231  
16,2,2210.301339  
16,2,1616.766667  
16,2,1998.581522  
16,2,2302.250000  
16,2,2377.684896  
16,2,2104.662791  
16,2,2302.686275  
16,2,2031.363636  
16,2,2123.192308  
16,2,1706.836538  
16,2,2250.166667  
16,2,1562.312500  
16,2,1891.796569  
16,2,2745.369444  
16,2,2523.293478  
16,2,1561.163690  
16,2,1554.659574  
16,2,1971.000000  
16,2,1628.093750  
16,2,10543.801136  
16,2,1875.924419  
16,2,1798.950581  
16,2,9525.819149  
16,2,2079.681818  
16,2,2225.680000  
16,2,2487.618421  
16,2,1991.530000  
16,2,1528.046875  
16,2,1790.489796  
16,2,1804.562500  
16,2,2033.875000  
16,2,3796.941026  
16,2,7856.829545  
16,2,3819.500000  
16,2,1882.538043  
16,2,1538.000000  
16,2,2050.454167  
16,2,1678.782609  
16,2,4802.885246  
16,2,3564.660326  
16,2,1660.333333  
16,2,8589.375000  
16,2,6836.116071

16,2,1989.868750  
16,2,1606.702128  
16,2,4261.696809  
16,2,2761.312500  
16,2,2084.140000  
16,2,1750.723404  
16,2,1843.350446  
16,2,2452.875000  
16,2,2014.129386  
16,2,1574.347826  
16,2,1558.347222  
16,2,1760.882353  
16,2,1947.333333  
16,2,1959.170213  
16,2,1848.333333  
16,2,1810.115000  
16,2,2585.088235  
16,2,2305.015957  
16,2,2115.669643  
16,2,2647.186224  
16,2,3378.179487  
16,2,4173.375000  
16,2,1693.713942  
16,2,2258.851293  
16,2,2547.075000  
16,2,1895.654167  
16,2,1695.847222  
16,2,1562.564024  
16,2,2784.944444  
16,2,2054.187500  
16,2,4528.800000  
16,2,3771.162500  
16,2,1523.307500  
16,2,3909.491071  
16,2,1748.390625  
16,2,2233.610795  
16,2,1748.609375  
16,2,2173.500000  
16,2,1575.118750  
16,2,2145.229592  
16,2,5718.447368  
16,2,2064.404412  
16,2,15721.295455  
16,2,3806.319149  
16,2,1635.089286  
16,2,1645.022959  
16,2,2503.500000  
16,2,1840.500000  
16,2,6865.832589  
16,2,2094.083333  
16,2,1875.375000  
16,2,2572.650000  
16,2,1646.053571  
16,2,2505.669118  
16,2,5097.621951  
16,2,1936.000000  
16,2,4227.167832  
16,2,1921.808140  
16,2,1636.402174  
16,2,2160.387500  
16,2,3732.656915  
16,2,2020.826923  
16,2,1771.993056  
16,2,2004.583333  
16,2,1620.638298  
16,2,1669.461538

16,2,6999.230392  
16,2,1787.928571  
16,2,1531.705882  
16,2,3580.010417  
16,2,2004.644231  
16,2,1516.400000  
16,2,5852.145000  
16,2,1502.908537  
16,2,2077.093085  
16,2,2632.166667  
16,2,1823.204545  
16,2,1818.571429  
16,2,1544.682927  
16,2,1624.573171  
16,2,1543.594828  
16,2,3246.668478  
16,2,1629.293750  
16,2,1675.916667  
16,2,1779.101064  
16,2,2222.915094  
16,2,1814.404762  
16,2,1664.597826  
16,2,1646.093750  
16,2,1719.071429  
16,2,2245.310000  
16,2,1606.890625  
16,2,1539.500000  
16,2,1988.274510  
16,2,2203.108974  
16,2,1890.059524  
16,2,4792.025463  
16,2,1994.787234  
16,2,1801.787500  
16,2,5414.106250  
16,2,1917.046569  
16,2,1859.979592  
16,2,4485.184375  
16,2,1876.250000  
16,2,1568.729730  
16,2,1580.840909  
16,2,2826.411765  
16,2,4921.576531  
16,2,9812.328125  
16,2,1929.421053  
16,2,3807.115385  
16,2,6497.172500  
16,2,2835.539326  
16,2,1677.750000  
16,2,2351.509615  
16,2,1908.413265  
16,2,2187.625000  
16,2,2859.962719  
16,2,1773.814103  
16,2,6941.625000  
16,2,3018.593750  
16,2,1769.397959  
16,2,2078.788043  
16,2,2487.698370  
16,2,2788.084906  
16,2,1856.581731  
16,2,3374.229167  
16,2,2332.980000  
16,2,1877.631579  
16,2,1898.106383  
16,2,4535.026961  
16,2,3332.618750

16,2,2681.267857  
16,2,1871.675000  
16,2,1862.364796  
16,2,4398.146341  
16,2,1894.841463  
16,2,1574.562500  
16,2,2252.250000  
16,2,2027.966981  
16,2,2517.225962  
16,2,1678.882353  
16,2,2254.562500  
16,2,2889.725000  
16,2,2938.671875  
16,2,4951.993421  
16,2,2081.448864  
16,2,2344.980000  
16,2,1574.642857  
16,2,1581.022500  
16,2,1714.798913  
16,2,4773.157692  
16,2,3288.277778  
16,2,1852.755102  
16,2,1920.764706  
16,2,2556.428571  
16,2,2011.661765  
16,2,1658.143293  
16,2,2337.572917  
16,2,2061.824324  
16,2,1791.928571  
16,2,1536.676630  
16,2,1934.000000  
16,2,1589.275862  
16,2,2479.250000  
16,2,1954.635714  
16,2,1766.562500  
16,2,1963.173611  
16,2,1812.852941  
16,2,1613.726190  
16,2,3489.852778  
16,2,2377.105556  
16,2,1604.113372  
16,2,1652.892157  
16,2,2792.711538  
16,2,1748.690476  
16,2,2259.600000  
16,2,1905.410714  
16,2,1872.954545  
16,2,1709.388393  
16,2,1660.618182  
16,2,2790.808673  
16,2,1526.206522  
16,2,1541.740385  
16,2,1551.944444  
16,2,4881.941176  
16,2,5731.368421  
16,2,17008.285714  
16,2,1882.813830  
16,2,3804.450000  
16,2,1563.185000  
16,2,1525.878049  
16,2,2835.596154  
16,2,2480.437500  
16,2,1789.578431  
16,2,4137.648936  
16,2,2959.096154  
16,2,2042.687500

16,2,2650.250000  
16,2,2000.145349  
16,2,2751.296296  
16,2,2310.409091  
16,2,1612.260870  
16,2,2263.090909  
16,2,3970.500000  
16,2,10649.515244  
16,2,2105.231481  
16,2,10956.792411  
16,2,1518.238095  
16,2,3214.333333  
16,2,1646.141304  
16,2,8677.880682  
16,2,3695.617647  
16,2,15434.973214  
16,2,9655.595745  
16,2,6814.454054  
16,2,1524.494318  
16,2,2630.287736  
16,2,3433.645455  
16,2,3957.957447  
16,2,1698.581818  
16,2,2596.804054  
16,2,2377.147727  
16,2,2585.872024  
16,2,1665.831633  
16,2,1508.614130  
16,2,3629.347826  
16,2,1891.394737  
16,2,3559.238889  
16,2,1830.914773  
16,2,1605.812500  
16,2,1759.138889  
16,2,1731.640625  
16,2,2078.506696  
16,2,2154.901786  
16,2,2766.132353  
16,2,3485.892857  
16,2,2240.937209  
16,2,2489.801932  
16,2,1905.434783  
16,2,16708.454545  
16,2,1935.917910  
16,2,1637.651163  
16,2,2551.125000  
16,2,3169.163265  
16,2,2299.840000  
16,2,1695.208333  
16,2,3959.368750  
16,2,1761.566667  
16,2,3649.170732  
16,2,2167.000000  
16,2,2023.825000  
16,2,3866.128049  
16,2,4120.622549  
16,2,8376.016949  
16,2,2051.404255  
16,2,5545.250000  
16,2,1637.604651  
16,2,2889.815217  
16,2,1602.464286  
16,2,2273.006356  
16,2,1562.950000  
16,2,1778.214286  
16,2,4510.956522

16,2,1553.000000  
16,2,2242.902778  
16,2,2512.948864  
16,2,1551.122283  
16,2,2310.875000  
16,2,1653.545455  
16,2,3199.364583  
16,2,1758.302083  
16,2,7757.255556  
16,2,1709.800000  
16,2,1573.408163  
16,2,1862.872093  
16,2,1979.728723  
16,2,2190.442708  
16,2,1587.392857  
16,2,2582.494565  
16,2,1959.562500  
16,2,1605.000000  
16,2,2365.968085  
16,2,1710.900000  
16,2,1709.076220  
16,2,1973.000000  
16,2,1719.883152  
16,2,1524.038265  
16,2,2167.846591  
16,2,2706.742788  
16,2,3189.017857  
16,2,12716.742188  
16,2,1591.597561  
16,2,1621.026042  
16,2,1588.492647  
16,2,1623.750000  
16,2,1839.452128  
16,2,1876.372845  
16,2,2142.869792  
16,2,2033.609375  
16,2,2141.919118  
16,2,2992.563725  
16,2,1554.500000  
16,2,2589.447115  
16,2,1854.326316  
16,2,3383.596591  
16,2,1790.209302  
16,2,2078.717391  
16,2,2094.470455  
16,2,3005.351351  
16,2,1593.528125  
16,2,2425.377778  
16,2,2264.454545  
16,2,2074.961538  
16,2,2733.760417  
16,2,2197.388021  
16,2,1661.075000  
16,2,2548.051136  
16,2,2754.122024  
16,2,1656.428571  
16,2,1661.813253  
16,2,2845.687500  
16,2,1911.591216  
16,2,1939.750000  
16,2,4155.166667  
16,2,3094.217593  
16,2,5809.554348  
16,2,2093.500000  
16,2,1621.937500  
16,2,1862.413043

16,2,1706.045455  
16,2,2787.255208  
16,2,1527.648649  
16,2,1823.573171  
16,2,1750.541667  
16,2,3048.575000  
16,2,1955.280172  
16,2,1799.909091  
16,2,1953.800000  
16,2,2507.397059  
16,2,1964.243243  
16,2,5718.213415  
16,2,2061.166667  
16,2,2000.605769  
16,2,2787.000000  
16,2,1503.226064  
16,2,1915.000000  
16,2,2414.395349  
16,2,2903.709302  
16,2,2662.408654  
16,2,1861.262500  
16,2,1589.510638  
16,2,1968.357143  
16,2,2598.098958  
16,2,4426.782609  
16,2,2441.211957  
16,2,1989.651515  
16,2,2421.234756  
16,2,2267.955556  
16,2,2666.777273  
16,2,2291.783654  
16,2,2551.565104  
16,2,1980.147222  
16,2,3485.456522  
16,2,2586.855769  
16,2,1589.358491  
16,2,1840.050000  
16,2,3127.000000  
16,2,3165.766667  
16,2,2006.559278  
16,2,1971.881944  
16,2,1599.885417  
16,2,6173.463415  
16,2,2696.525000  
16,2,2944.772727  
16,2,1543.563953  
16,2,2938.333333  
16,2,2298.266447  
16,2,1646.000000  
16,2,1689.615385  
16,2,1717.487805  
16,2,2807.083333  
16,2,1550.143750  
16,2,1528.375000  
16,2,1933.954082  
16,2,1751.148148  
16,2,2134.680000  
16,2,1962.804348  
16,2,2075.933824  
16,2,1579.908784  
16,2,12755.172872  
16,2,2439.043750  
16,2,2596.617647  
16,2,3875.169271  
16,2,2126.840426  
16,2,2344.042553

16,2,2080.533333  
16,2,1965.830189  
16,2,2245.812500  
16,2,1660.544118  
16,2,2114.710000  
16,2,3489.960526  
16,2,2487.304054  
16,2,2243.692308  
16,2,2257.963415  
16,2,2645.489796  
16,2,2603.152778  
16,2,1815.423913  
16,2,1630.848837  
16,2,3534.037037  
16,2,4073.557927  
16,2,1772.565476  
16,2,1982.328125  
16,2,2176.801471  
16,2,2608.846154  
16,2,1710.971591  
16,2,7125.247159  
16,2,1847.134146  
16,2,2461.400000  
16,2,3823.764706  
16,2,1794.836735  
16,2,1790.138298  
16,2,1835.528846  
16,2,1905.097561  
16,2,1608.116071  
16,2,2335.831633  
16,2,4975.862903  
16,2,3229.846939  
16,2,1858.342105  
16,2,1688.950000  
16,2,6561.910714  
16,2,1979.665761  
16,2,1554.000000  
16,2,1711.104167  
16,2,1788.738636  
16,2,2895.783654  
16,2,16490.388889  
16,2,1910.795455  
16,2,1636.074074  
16,2,1947.702703  
16,2,3043.258621  
16,2,2406.012195  
16,2,2243.106383  
16,2,1974.375000  
16,2,3549.709091  
16,2,1755.309375  
16,2,1590.731383  
16,2,1830.986979  
16,2,4393.619048  
16,2,1899.169811  
16,2,1514.902778  
16,2,6901.565341  
16,2,2711.928571  
16,2,2348.504808  
16,2,1618.564904  
16,2,1505.147321  
16,2,1808.348214  
16,2,1996.078488  
16,2,2609.977273  
16,2,2036.837838  
16,2,1686.950521  
16,2,2294.731707

16,2,2182.025641  
16,2,1524.687500  
16,2,2801.151042  
16,2,2959.520833  
16,2,10632.002660  
16,2,2391.000000  
16,2,2698.151316  
16,2,2968.412234  
16,2,1960.252551  
16,2,2029.696809  
16,2,1589.795918  
16,2,8638.921875  
16,2,2094.290000  
16,2,1781.088889  
16,2,1697.534574  
16,2,2208.430556  
16,2,3532.760870  
16,2,3053.850610  
16,2,1589.330357  
16,2,5775.551020  
16,2,2266.468750  
16,2,2088.800000  
16,2,1723.988372  
16,2,2720.079545  
16,2,4443.377193  
16,2,2354.128676  
16,2,1828.860294  
16,2,2348.127660  
16,2,1702.153409  
16,2,2114.140244  
16,2,4188.232143  
16,2,1708.940789  
16,2,1698.036458  
16,2,1817.300000  
16,2,1880.132979  
16,2,1508.838415  
16,2,1791.500000  
16,2,2216.687500  
16,2,1506.018293  
16,2,4817.984375  
16,2,1627.204082  
16,2,2934.375000  
16,2,2669.139881  
16,2,1654.718750  
16,2,1958.769231  
16,2,2064.034375  
16,2,2030.363208  
16,2,8283.716981  
16,2,3532.225131  
16,2,5586.179054  
16,2,2275.469388  
16,2,4238.444444  
16,2,2301.062500  
16,2,4017.837500  
16,2,1523.888889  
16,2,11304.943182  
16,2,3390.903846  
16,2,1546.921053  
16,2,5885.145000  
16,2,1752.813953  
16,2,1526.767857  
16,2,1769.988636  
16,2,4851.525000  
16,2,2970.010638  
16,2,2039.062500  
16,2,4593.857143

16,2,1976.790698  
16,2,3021.750000  
16,2,1987.884146  
16,2,1957.250000  
16,2,1505.250000  
16,2,1588.782609  
16,2,2628.750000  
16,2,1596.740854  
16,2,1551.152439  
16,2,2312.218085  
16,2,1597.388889  
16,2,4248.968750  
16,2,4906.404661  
16,2,1574.928571  
16,2,1523.331818  
16,2,2513.438776  
16,2,1653.070312  
16,2,2369.533163  
16,2,5011.844595  
16,2,2478.375000  
16,2,1689.530405  
16,2,1734.262019  
16,2,2670.638298  
16,2,1933.411765  
16,2,2763.156250  
16,2,2897.365909  
16,2,1607.857143  
16,2,1598.315104  
16,2,2131.352273  
16,2,1978.685096  
16,2,9215.087500  
16,2,1883.625000  
16,2,2569.385135  
16,2,3607.953125  
16,2,2238.875000  
16,2,1932.375000  
16,2,2662.005319  
16,2,1723.128205  
16,2,1607.823370  
16,2,1784.921875  
16,2,2025.496875  
16,2,1932.500000  
16,2,2264.539773  
16,2,1648.609375  
16,2,2937.066489  
16,2,1639.676829  
16,2,2201.254545  
16,2,1969.890909  
16,2,1702.829082  
16,2,2375.459239  
16,2,3601.434783  
16,2,3237.942308  
16,2,2176.741071  
16,2,18208.267857  
16,2,2984.318182  
16,2,1600.261905  
16,2,1637.460227  
16,2,3483.393617  
16,2,3729.257812  
16,2,3920.422500  
16,2,2940.669118  
16,2,2402.837209  
16,2,2327.331250  
16,2,2424.503289  
16,2,2622.946429  
16,2,9939.118421

16,2,4441.542683  
16,2,8862.516667  
16,2,3119.836864  
16,2,1752.806250  
16,2,1513.275000  
16,2,1732.071429  
16,2,1713.410714  
16,2,12193.768293  
16,2,1688.163462  
16,2,1732.894231  
16,2,3297.106132  
16,2,2090.406250  
16,2,5958.983412  
16,2,2003.000000  
16,2,2705.542553  
16,2,1780.944149  
16,2,1628.712500  
16,2,1639.456522  
16,2,1792.172619  
16,2,1724.268293  
16,2,1639.261111  
16,2,5636.002976  
16,2,19300.073171  
16,2,2936.325000  
16,2,1709.317308  
16,2,2194.608553  
16,2,1673.494792  
16,2,4404.585526  
16,2,3325.222222  
16,2,2626.183673  
16,2,2867.902439  
16,2,2619.709184  
16,2,2132.507500  
16,2,1820.423077  
16,2,1684.861702  
16,2,3567.062500  
16,2,1540.125000  
16,2,3328.131868  
16,2,2546.472561  
16,2,1663.625000  
16,2,1522.482143  
16,2,2100.210526  
16,2,1749.031250  
16,2,2606.559783  
16,2,1651.200000  
16,2,1967.071429  
16,2,1863.479592  
16,2,1671.500000  
16,2,2851.733333  
16,2,3779.517857  
16,2,1530.843750  
16,2,1709.923295  
16,2,1534.220000  
16,2,1857.772727  
16,2,2296.773026  
16,2,2681.000000  
16,2,2191.964286  
16,2,1507.015625  
16,2,2457.800000  
16,2,1571.743421  
16,2,1664.500000  
16,2,1501.392157  
16,2,1804.782051  
16,2,2814.125000  
16,2,2355.214286  
16,2,13605.480769

16,2,2443.946429  
16,2,3237.125000  
16,2,2757.651163  
16,2,2677.883721  
16,2,1768.089674  
16,2,3818.827500  
16,2,1887.352273  
16,2,1865.283333  
16,2,2463.834906  
16,2,2778.840686  
16,2,2545.179688  
16,2,2201.833333  
16,2,1805.556818  
16,2,1916.211735  
16,2,6823.372727  
16,2,2794.309783  
16,2,5361.489583  
16,2,2286.830357  
16,2,3269.865132  
16,2,1894.525000  
16,2,1726.312500  
16,2,2142.853659  
16,2,2492.430556  
16,2,2396.765625  
16,2,1688.625000  
16,2,1604.508721  
16,2,4231.329787  
16,2,1616.750000  
16,2,1513.114583  
16,2,1523.785714  
16,2,2713.368421  
16,2,4792.140000  
16,2,1524.424342  
16,2,2797.616071  
16,2,2107.627551  
16,2,1848.437500  
16,2,1709.993750  
16,2,2843.161932  
16,2,2608.959239  
16,2,1939.901786  
16,2,1546.301020  
16,2,1920.056548  
16,2,2909.323370  
16,2,2240.871622  
16,2,1630.925847  
16,2,1703.976744  
16,2,2321.215385  
16,2,1721.405556  
16,2,1620.618902  
16,2,1531.600000  
16,2,3966.691489  
16,2,1893.825472  
16,2,7678.551136  
16,2,5004.605263  
16,2,3159.051471  
16,2,1560.234375  
16,2,1629.267442  
16,2,1689.648936  
16,2,1661.490625  
16,2,1619.735000  
16,2,2139.035714  
16,2,1930.595745  
16,2,1536.741071  
16,2,4110.445652  
16,2,1944.183673  
16,2,3201.862069

16,2,1605.750000  
16,2,2391.314103  
16,2,1692.637500  
16,2,9377.160714  
16,2,1758.985000  
16,2,2539.208333  
16,2,2292.416667  
16,2,3885.282895  
16,2,2082.344444  
16,2,2288.476562  
16,2,1537.383523  
16,2,1502.447368  
16,2,1540.186170  
16,2,1981.000000  
16,2,7254.326531  
16,2,2038.726852  
16,2,3595.330000  
16,2,1717.804878  
16,2,1541.548780  
16,2,4241.551020  
16,2,2992.978723  
16,2,1903.176136  
16,2,1847.892857  
16,2,1517.565217  
16,2,2462.500000  
16,2,1720.780612  
16,2,1621.279070  
16,2,2244.878049  
16,2,1748.808824  
16,2,3124.510638  
16,2,2217.255814  
16,2,2084.734043  
16,2,1641.477564  
16,2,2679.882353  
16,2,1906.477941  
16,2,2695.253049  
16,2,1770.222826  
16,2,1789.241071  
16,2,1871.442857  
16,2,1578.000000  
16,2,1755.510638  
16,2,2710.533333  
16,2,1763.171875  
16,2,1789.464286  
16,2,2822.303571  
16,2,3229.052885  
16,2,1931.594595  
16,2,2135.956522  
16,2,1872.987805  
16,2,18118.527027  
16,2,1616.670673  
16,2,3002.672619  
16,2,1970.657895  
16,2,2648.823529  
16,2,4720.500000  
16,2,1716.336735  
16,2,1708.938679  
16,2,4287.295455  
16,2,1916.512931  
16,2,1619.972222  
16,2,3552.975962  
16,2,1872.546875  
16,2,1728.723404  
16,2,2028.950000  
16,2,3242.463415  
16,2,2027.301724

16,2,1803.234756  
16,2,1717.343750  
16,2,2075.132500  
16,2,1510.788462  
16,2,2268.616848  
16,2,2151.300000  
16,2,1895.612500  
16,2,1551.540323  
16,2,1531.153409  
16,2,1611.495370  
16,2,1836.523585  
16,2,1956.303922  
16,2,1845.696809  
16,2,2636.020833  
16,2,6023.011029  
16,2,2198.687500  
16,2,1816.333333  
16,2,2250.420455  
16,2,1922.000000  
16,2,1827.173077  
16,2,1997.196809  
16,2,2099.990566  
16,2,15283.512195  
16,2,1904.023256  
16,2,1970.877778  
16,2,1586.571429  
16,2,1583.951220  
16,2,1560.364583  
16,2,1535.920732  
16,2,1536.097561  
16,2,6712.807692  
16,2,1520.865385  
16,2,2939.463415  
16,2,4413.074468  
16,2,1691.822368  
16,2,1643.701087  
16,2,2322.478723  
16,2,2841.888298  
16,2,3285.534014  
16,2,2239.502717  
16,2,1505.500000  
16,2,2367.257653  
16,2,1539.630000  
16,2,1520.627907  
16,2,1652.711957  
16,2,1784.640625  
16,2,2431.627778  
16,2,2074.979592  
16,2,1814.812500  
16,2,2120.277778  
16,2,2193.727273  
16,2,1681.488095  
16,2,2576.500000  
16,2,2369.423077  
16,2,2375.513158  
16,2,1506.578431  
16,2,3042.901961  
16,2,3018.000000  
16,2,3087.821429  
16,2,2671.250000  
16,2,2688.140097  
16,2,2054.702128  
16,2,1604.687500  
16,2,1544.750000  
16,2,4129.607143  
16,2,1785.033333

16,2,12491.534483  
16,2,1644.932018  
16,2,1986.333333  
16,2,2932.339286  
16,2,1545.985119  
16,2,2864.333333  
16,2,2310.493056  
16,2,1564.250000  
16,2,1687.855769  
16,2,1625.432143  
16,2,3120.921875  
16,2,1721.437500  
16,2,2147.162162  
16,2,1868.335227  
16,2,1695.131579  
16,2,1571.500000  
16,2,1784.073529  
16,2,2250.959184  
16,2,2066.398936  
16,2,4945.625000  
16,2,3019.388587  
16,2,3452.265306  
16,2,2098.606771  
16,2,2221.317130  
16,2,3957.313953  
16,2,2508.800000  
16,2,1718.229651  
16,2,1942.329545  
16,2,1603.989865  
16,2,2104.400735  
16,2,2030.000000  
16,2,2780.480978  
16,2,1567.300000  
16,2,1666.122449  
16,2,1526.058511  
16,2,3470.702128  
16,2,1649.421875  
16,2,2593.568182  
16,2,14144.989865  
16,2,2052.646277  
16,2,2042.220395  
16,2,1968.481383  
16,2,4838.147436  
16,2,2012.272727  
16,2,1653.127717  
16,2,2525.975000  
16,2,2266.726064  
16,2,1949.285714  
16,2,1605.561224  
16,2,2702.384615  
16,2,16480.912791  
16,2,1559.455357  
16,2,2843.611111  
16,2,1829.750000  
16,2,5569.701923  
16,2,1544.242500  
16,2,1775.857143  
16,2,1609.323980  
16,2,1715.555556  
16,2,2019.446809  
16,2,2160.712963  
16,2,2001.833333  
16,2,3481.428571  
16,2,1950.421875  
16,2,2383.869565  
16,2,3174.131696

16,2,1897.117188  
16,2,1660.816038  
16,2,1890.485000  
16,2,2883.159574  
16,2,2445.354167  
16,2,3401.284091  
16,2,4837.394231  
16,2,1751.877907  
16,2,1558.406250  
16,2,2474.280488  
16,2,2821.318182  
16,2,1816.648438  
16,2,1660.463710  
16,2,1939.510638  
16,2,1656.198661  
16,2,1995.640625  
16,2,1501.679878  
16,2,1868.253049  
16,2,1884.958333  
16,2,3621.331395  
16,2,5709.533333  
16,2,1697.125000  
16,2,2402.893617  
16,2,2726.541667  
16,2,2049.287234  
16,2,1698.776786  
16,2,1662.727500  
16,2,2261.700000  
16,2,2820.739286  
16,2,1832.610000  
16,2,2078.013889  
16,2,2525.544643  
16,2,1719.039474  
16,2,1544.063830  
16,2,1788.783654  
16,2,2216.571429  
16,2,1896.163265  
16,2,1538.883333  
16,2,1525.450000  
16,2,1932.765957  
16,2,1618.448718  
16,2,1796.234756  
16,2,1802.500000  
16,2,1570.250000  
16,2,6187.535714  
16,2,1519.037500  
16,2,2590.607500  
16,2,1853.682292  
16,2,3643.391827  
16,2,1681.957447  
16,2,1615.830882  
16,2,2326.887097  
16,2,4440.375000  
16,2,3962.809659  
16,2,1548.418605  
16,2,2841.483696  
16,2,1632.306818  
16,2,1625.963415  
16,2,2152.789894  
16,2,1958.561828  
16,2,1992.640000  
16,2,1600.004808  
16,2,2192.204082  
16,2,1846.395833  
16,2,1793.019231  
16,2,2182.906250

16,2,2635.085526  
16,2,1730.617647  
16,2,2562.512195  
16,2,1650.573529  
16,2,1646.460526  
16,2,1517.937500  
16,2,1642.428571  
16,2,2132.798077  
16,2,2845.137755  
16,2,4131.086957  
16,2,1746.687500  
16,2,1512.789474  
16,2,2854.665865  
16,2,2349.112500  
16,2,1808.643382  
16,2,2416.000000  
16,2,4299.583333  
16,2,1921.134146  
16,2,3545.019231  
16,2,1582.262195  
16,2,1878.899390  
16,2,3173.505319  
16,2,1849.518293  
16,2,1507.586957  
16,2,2444.035714  
16,2,3177.011905  
16,2,1974.957317  
16,2,2151.487805  
16,2,2456.660256  
16,2,2012.782609  
16,2,2462.339623  
16,2,1583.596154  
16,2,1943.052500  
16,2,2547.272500  
16,2,1865.407609  
16,2,1533.512195  
16,2,6623.050000  
16,2,1522.935897  
16,2,2306.120000  
16,2,1502.462264  
16,2,1712.500000  
16,2,1712.923077  
16,2,1547.545455  
16,2,1741.020833  
16,2,1522.416667  
16,2,1845.547872  
16,2,2792.574074  
16,2,1526.529412  
16,2,2426.891827  
16,2,1990.051471  
16,2,3458.048077  
16,2,2289.766667  
16,2,2661.900510  
16,2,1887.180556  
16,2,1816.513889  
16,2,1825.534722  
16,2,1548.500000  
16,2,1654.750000  
16,2,4741.218750  
16,2,1710.767857  
16,2,2716.090909  
16,2,4449.613636  
16,2,2876.961340  
16,2,2818.710227  
16,2,2612.611111  
16,2,2141.371795

16,2,2930.362500  
16,2,2174.241477  
16,2,3052.240909  
16,2,1564.720930  
16,2,1920.908537  
16,2,1552.096939  
16,2,2521.479651  
16,2,2145.212500  
16,2,1580.352273  
16,2,2133.082447  
16,2,2361.583333  
16,2,2344.910714  
16,2,2100.577128  
16,2,1523.021277  
16,2,1642.116071  
16,2,2921.948529  
16,2,2315.464286  
16,2,2666.484848  
16,2,1733.120690  
16,2,2062.750000  
16,2,1797.275862  
16,2,1606.586957  
16,2,2681.900000  
16,2,3121.651442  
16,2,2715.151515  
16,2,1843.105000  
16,2,1570.044118  
16,2,1699.407895  
16,2,1634.923913  
16,2,1599.197500  
16,2,2090.719444  
16,2,2135.313830  
16,2,3293.607143  
16,2,2627.385870  
16,2,2700.171196  
16,2,1663.101449  
16,2,1731.059211  
16,2,1993.044444  
16,2,2202.444444  
16,2,2782.805556  
16,2,2280.350000  
16,2,1782.042683  
16,2,16113.812500  
16,2,1765.603659  
16,2,2120.838415  
16,2,1748.638393  
16,2,1733.950658  
16,2,11977.090116  
16,2,2413.985294  
16,2,1857.000000  
16,2,2479.510870  
16,2,1649.690625  
16,2,2017.752232  
16,2,8615.046512  
16,2,1639.900000  
16,2,1758.043478  
16,2,2562.000000  
16,2,2166.392157  
16,2,2321.322917  
16,2,1809.583333  
16,2,3166.119048  
16,2,1787.184783  
16,2,1798.815000  
16,2,1591.191489  
16,2,4809.757353  
16,2,1559.811321

16,2,1505.901163  
16,2,1986.323529  
16,2,1612.732143  
16,2,1606.865625  
16,2,1557.643382  
16,2,2016.315000  
16,2,2289.730769  
16,2,2362.884868  
16,2,1819.887097  
16,2,1791.170213  
16,2,1617.583333  
16,2,1615.515625  
16,2,5008.778571  
16,2,1661.382653  
16,2,2864.868590  
16,2,2107.325000  
16,2,1900.834184  
16,2,2006.386139  
16,2,3286.987179  
16,2,4107.714286  
16,2,1698.800000  
16,2,1922.463235  
16,2,2123.750000  
16,2,1977.500000  
16,2,1690.909574  
16,2,2066.347826  
16,2,1851.391304  
16,2,2412.787500  
16,2,1532.465116  
16,2,2344.757812  
16,2,1819.955882  
16,2,2026.542683  
16,2,1539.721354  
16,2,1509.360294  
16,2,3111.351064  
16,2,1622.817308  
16,2,1537.477273  
16,2,1830.804688  
16,2,2015.570000  
16,2,1580.300000  
16,2,4473.105556  
16,2,2787.625000  
16,2,2795.545455  
16,2,1655.162879  
16,2,1918.615854  
16,2,2271.021277  
16,2,1499.576923  
16,2,1611.639151  
16,2,1661.930000  
16,2,2227.760000  
16,2,2139.067073  
16,2,1646.610000  
16,2,1599.083333  
16,2,2926.597826  
16,2,2649.619048  
16,2,2243.411585  
16,2,2762.617188  
16,2,1688.042553  
16,2,1827.195122  
16,2,1603.308333  
16,2,1502.718182  
16,2,3899.279255  
16,2,3470.007812  
16,2,1608.345000  
16,2,2868.187500  
16,2,1865.352941

16,2,1721.547170  
16,2,1924.319444  
16,2,2667.226190  
16,2,2299.365854  
16,2,3788.978659  
16,2,2336.410714  
16,2,2454.660714  
16,2,1745.690000  
16,2,3119.478261  
16,2,1775.119048  
16,2,2099.793750  
16,2,1775.716981  
16,2,1596.576531  
16,2,1772.111111  
16,2,1966.818182  
16,2,4775.866848  
16,2,2584.821429  
16,2,1574.750000  
16,2,1511.978261  
16,2,2345.474359  
16,2,2110.058140  
16,2,2521.687500  
16,2,2161.883333  
16,2,2305.109589  
16,2,1731.292683  
16,2,2404.250000  
16,2,1969.750000  
16,2,2264.361111  
16,2,1611.781250  
16,2,1829.103261  
16,2,2741.500000  
16,2,2502.750000  
16,2,4295.663265  
16,2,2061.256098  
16,2,2027.311224  
16,2,1820.709302  
16,2,1700.073864  
16,2,3690.141827  
16,2,1690.717949  
16,2,1700.944853  
16,2,1883.076923  
16,2,1991.500000  
16,2,2078.364865  
16,2,1871.903061  
16,2,4237.813830  
16,2,2236.097561  
16,2,1708.619898  
16,2,1993.877358  
16,2,2801.384375  
16,2,2096.600000  
16,2,1638.812500  
16,2,1740.521739  
16,2,1868.045000  
16,2,2461.579268  
16,2,1986.390625  
16,2,2869.937500  
16,2,1951.600000  
16,2,3236.227273  
16,2,1850.750000  
16,2,1661.307692  
16,2,1526.554878  
16,2,1959.798611  
16,2,1895.000000  
16,2,1530.260870  
16,2,1761.150000  
16,2,1985.792453

16,2,2059.798387  
16,2,3069.500000  
16,2,1931.339744  
16,2,2834.829032  
16,2,2660.698324  
16,2,4794.002604  
16,2,2025.250000  
16,2,2287.635000  
16,2,2183.760870  
16,2,4457.840000  
16,2,1666.750000  
16,2,2367.122449  
16,2,1677.065217  
16,2,1954.610465  
16,2,2445.475000  
16,2,4081.058824  
16,2,3840.883721  
16,2,1749.790698  
16,2,1763.076923  
16,2,1573.617788  
16,2,1875.431250  
16,2,2033.454545  
16,2,1770.696429  
16,2,3056.234043  
16,2,5462.138889  
16,2,1692.220588  
16,2,1796.544271  
16,2,1554.959184  
16,2,3417.344828  
16,2,3235.858696  
16,2,1677.958333  
16,2,4290.267442  
16,2,1707.136364  
16,2,2457.267857  
16,2,1924.125000  
16,2,2718.571429  
16,2,3298.390000  
16,2,19736.365854  
16,2,5582.017544  
16,2,3735.375000  
16,2,1633.805000  
16,2,16162.697368  
16,2,1933.271429  
16,2,2576.936170  
16,2,2063.019608  
16,2,1540.988095  
16,2,2319.712766  
16,2,2208.313725  
16,2,2111.855000  
16,2,2092.886364  
16,2,7646.687500  
16,2,1564.770833  
16,2,1996.200472  
16,2,1771.977778  
16,2,1877.000000  
16,2,2355.532609  
16,2,1521.125000  
16,2,1558.521341  
16,2,4550.435714  
16,2,3034.841912  
16,2,2860.690000  
16,2,1723.195946  
16,2,2524.875000  
16,2,2195.431818  
16,2,3106.225806  
16,2,5047.847826

16,2,16181.837209  
16,2,8432.430921  
16,2,2026.800000  
16,2,1785.597826  
16,2,1530.653846  
16,2,16278.723684  
16,2,4049.620370  
16,2,1906.872449  
16,2,3071.800000  
16,2,2334.625000  
16,2,2592.820000  
16,2,1759.392857  
16,2,2537.903125  
16,2,1979.609375  
16,2,1534.500000  
16,2,1595.544118  
16,2,3240.838415  
16,2,1792.440625  
16,2,2916.934028  
16,2,2190.690217  
16,2,2174.230000  
16,2,1767.250000  
16,2,7730.125000  
16,2,1820.280000  
16,2,1533.181818  
16,2,1701.892045  
16,2,1640.042553  
16,2,4054.895833  
16,2,2915.200000  
16,2,1562.268987  
16,2,1736.000000  
16,2,1915.650000  
16,2,5931.741848  
16,2,6439.572115  
16,2,1874.428571  
16,2,2512.305556  
16,2,2207.125000  
16,2,1827.580128  
16,2,2269.488372  
16,2,2450.022727  
16,2,1775.050926  
16,2,2632.966346  
16,2,1693.617347  
16,2,1733.920732  
16,2,1925.617347  
16,2,1566.958333  
16,2,1501.613971  
16,2,1578.742500  
16,2,3492.739583  
16,2,1717.317073  
16,2,2107.054688  
16,2,1802.459746  
16,2,2092.546512  
16,2,2419.548780  
16,2,2086.208333  
16,2,2971.983333  
16,2,5081.831250  
16,2,1988.739362  
16,2,1779.241071  
16,2,5220.201923  
16,2,3659.324468  
16,2,2189.741279  
16,2,2622.688830  
16,2,2214.804487  
16,2,1912.492188  
16,2,2166.560811

16,2,1659.547872  
16,2,2015.714286  
16,2,2872.820000  
16,2,2432.967949  
16,2,2197.904762  
16,2,1641.571429  
16,2,2471.263514  
16,2,2187.083333  
16,2,1738.077778  
16,2,3490.250000  
16,2,2036.250000  
16,2,2374.744186  
16,2,1685.197368  
16,2,2302.530000  
16,2,2650.171875  
16,2,1674.840426  
16,2,1987.632075  
16,2,3462.014535  
16,2,4223.473822  
16,2,2046.650000  
16,2,2636.583333  
16,2,1905.133152  
16,2,3544.732955  
16,2,1775.586538  
16,2,1633.602564  
16,2,2027.705556  
16,2,1564.251366  
16,2,1997.647500  
16,2,12995.328947  
16,2,1874.000000  
16,2,1536.828947  
16,2,1606.307870  
16,2,1669.992347  
16,2,2943.282051  
16,2,1787.622396  
16,2,1546.742021  
16,2,2462.250000  
16,2,3379.521739  
16,2,1647.234286  
16,2,2019.146341  
16,2,1901.621324  
16,2,1660.586735  
16,2,2471.950000  
16,2,2249.553571  
16,2,1741.210000  
16,2,4327.910156  
16,2,3638.529412  
16,2,2072.938953  
16,2,1600.406250  
16,2,1601.375000  
16,2,1667.172872  
16,2,1740.070755  
16,2,1972.781250  
16,2,3437.576531  
16,2,2533.353261  
16,2,1818.411765  
16,2,2927.291667  
16,2,1521.752500  
16,2,10868.261111  
16,2,2154.598214  
16,2,1699.163265  
16,2,10505.969595  
16,2,1850.795455  
16,2,2006.310811  
16,2,2084.500000  
16,2,2276.756757

16,2,2392.307692  
16,2,1612.962500  
16,2,1969.088235  
16,2,1940.500000  
16,2,1692.537234  
16,2,7555.583333  
16,2,2819.872340  
16,2,1551.562500  
16,2,1580.579545  
16,2,1563.239130  
16,2,2464.308511  
16,2,1756.737500  
16,2,2921.000000  
16,2,2354.804878  
16,2,2414.122222  
16,2,1611.800000  
16,2,1802.765625  
16,2,19153.439024  
16,2,3041.892857  
16,2,3473.760638  
16,2,1733.585366  
16,2,1939.003289  
16,2,1949.320513  
16,2,1516.000000  
16,2,5241.291667  
16,2,1529.039062  
16,2,1957.351190  
16,2,1638.298077  
16,2,1758.500000  
16,2,1847.613372  
16,2,2602.003676  
16,2,6275.675000  
16,2,1964.225490  
16,2,2073.296875  
16,2,2187.739796  
16,2,1500.250000  
16,2,1866.821809  
16,2,2196.466837  
16,2,2985.955000  
16,2,1628.401042  
16,2,5881.426136  
16,2,1809.780488  
16,2,1850.203125  
16,2,1771.954082  
16,2,2174.357143  
16,2,2011.973214  
16,2,1886.642857  
16,2,2272.000000  
16,2,1964.681250  
16,2,3055.086957  
16,2,10301.774390  
16,2,2820.864130  
16,2,1580.103175  
16,2,1538.562500  
16,2,1885.090426  
16,2,1675.808511  
16,2,2131.955128  
16,2,2101.500000  
16,2,2440.816327  
16,2,2312.889706  
16,2,2716.586957  
16,2,2230.400000  
16,2,1550.429348  
16,2,1718.837662  
16,2,1653.204082  
16,2,2243.722222

16,2,2592.078947  
16,2,2164.360294  
16,2,2016.308036  
16,2,4586.211111  
16,2,9083.982639  
16,2,1975.253049  
16,2,2285.320000  
16,2,2627.819149  
16,2,1614.225000  
16,2,1553.160714  
16,2,1680.236111  
16,2,2159.200000  
16,2,1596.875000  
16,2,1628.193750  
16,2,2974.527174  
16,2,1537.850694  
16,2,2214.947368  
16,2,1609.689655  
16,2,2528.464481  
16,2,1590.740000  
16,2,1663.271277  
16,2,3184.407609  
16,2,2289.703030  
16,2,1555.397959  
16,2,1993.611111  
16,2,2856.781250  
16,2,4498.770833  
16,2,1668.043269  
16,2,1542.770000  
16,2,1572.230556  
16,2,1691.448980  
16,2,1761.557065  
16,2,1537.437500  
16,2,2453.890244  
16,2,1593.260000  
16,2,1637.808140  
16,2,1992.738095  
16,2,1967.132812  
16,2,4259.125000  
16,2,2001.636364  
16,2,3723.434896  
16,2,4436.227500  
16,2,1627.439560  
16,2,9587.974359  
16,2,2169.983696  
16,2,1521.022222  
16,2,2110.645833  
16,2,1929.047222  
16,2,1929.538462  
16,2,1917.044643  
16,2,2618.201389  
16,2,1773.277778  
16,2,1965.153846  
16,2,1714.000000  
16,2,4531.264205  
16,2,1561.731707  
16,2,1529.319149  
16,2,1738.266667  
16,2,1815.117647  
16,2,3068.187500  
16,2,2947.539062  
16,2,1680.829268  
16,2,2229.237500  
16,2,1638.817308  
16,2,1859.190000  
16,2,4063.200581

16,2,1664.478723  
16,2,1524.708333  
16,2,2620.976744  
16,2,3739.666667  
16,2,2528.522222  
16,2,1605.294872  
16,2,2355.662500  
16,2,1520.533654  
16,2,2534.125000  
16,2,2401.771739  
16,2,1659.388298  
16,2,3099.110294  
16,2,1663.125000  
16,2,2383.853659  
16,2,1917.540000  
16,2,2214.901442  
16,2,5686.515957  
16,2,2836.795455  
16,2,2470.165761  
16,2,7071.304545  
16,2,2905.375000  
16,2,1908.760000  
16,2,1604.022727  
16,2,4556.858696  
16,2,1905.260000  
16,2,2272.000000  
16,2,3929.346154  
16,2,1611.486842  
16,2,4407.006250  
16,2,1683.223837  
16,2,1938.056122  
16,2,2100.718182  
16,2,1843.538462  
16,2,2802.565217  
16,2,1669.709302  
16,2,1937.833333  
16,2,2057.334906  
16,2,2163.423913  
16,2,2612.857955  
16,2,1521.897059  
16,2,2144.449405  
16,2,5666.509375  
16,2,1555.821023  
16,2,1558.428571  
16,2,10586.785714  
16,2,3885.041667  
16,2,2138.367021  
16,2,2534.279412  
16,2,1910.273256  
16,2,1538.076923  
16,2,2545.263158  
16,2,1924.183511  
16,2,1952.285714  
16,2,1554.237179  
16,2,1803.855769  
16,2,1742.115854  
16,2,2874.068878  
16,2,2081.033333  
16,2,1848.000000  
16,2,1730.797872  
16,2,1563.004902  
16,2,1855.156250  
16,2,2697.606061  
16,2,1608.282051  
16,2,1549.457447  
16,2,2648.994565

16,2,4140.812500  
16,2,1705.166667  
16,2,1761.100000  
16,2,1822.006579  
16,2,1648.416667  
16,2,1756.222222  
16,2,2448.696429  
16,2,2465.318182  
16,2,2914.788462  
16,2,7977.396226  
16,2,1885.461538  
16,2,2167.831395  
16,2,1863.892857  
16,2,1825.791667  
16,2,1639.020408  
16,2,1741.416667  
16,2,1518.075581  
16,2,1766.607843  
16,2,1809.141892  
16,2,2059.214286  
16,2,2051.420673  
16,2,1588.069767  
16,2,2662.361702  
16,2,1659.104651  
16,2,2775.000000  
16,2,1827.330000  
16,2,1649.268750  
16,2,1993.198864  
16,2,1677.752358  
16,2,1841.843023  
16,2,2886.820000  
16,2,1544.636364  
16,2,1622.731383  
16,2,1823.831897  
16,2,1833.717262  
16,2,1646.883929  
16,2,2539.000000  
16,2,2427.785714  
16,2,1499.750000  
16,2,2435.440217  
16,2,2102.500000  
16,2,3855.224359  
16,2,1688.331081  
16,2,2914.526316  
16,2,1694.266667  
16,2,2391.119469  
16,2,3216.020408  
16,2,1636.893617  
16,2,2383.238095  
16,2,1824.661585  
16,2,1794.989796  
16,2,3000.203488  
16,2,13267.571429  
16,2,1546.772727  
16,2,2972.562500  
16,2,1735.977041  
16,2,2499.500000  
16,2,1851.583333  
16,2,3226.024510  
16,2,1907.744186  
16,2,2162.400000  
16,2,1862.938776  
16,2,6319.081081  
16,2,2960.197368  
16,2,1602.202128  
16,2,3639.654070

16,2,2180.000000  
16,2,2205.776596  
16,2,2620.289474  
16,2,2165.128049  
16,2,2345.000000  
16,2,1820.045732  
16,2,3147.203125  
16,2,1921.521429  
16,2,2257.561170  
16,2,2741.930851  
16,2,1903.877841  
16,2,2304.666667  
16,2,1567.505682  
16,2,2038.375000  
16,2,1505.421569  
16,2,2009.557143  
16,2,2984.312500  
16,2,5732.550595  
16,2,1799.000000  
16,2,1855.705128  
16,2,1802.654762  
16,2,2014.762500  
16,2,2100.144444  
16,2,1693.357143  
16,2,1706.155172  
16,2,3619.300000  
16,2,1813.171875  
16,2,1706.954545  
16,2,1995.333333  
16,2,2540.696335  
16,2,3234.654412  
16,2,9535.778409  
16,2,3209.000000  
16,2,2053.634615  
16,2,1754.000000  
16,2,2401.353659  
16,2,3039.903226  
16,2,1871.587209  
16,2,1902.128049  
16,2,2409.327381  
16,2,1641.079268  
16,2,2488.103659  
16,2,3117.914286  
16,2,1961.721154  
16,2,2733.924528  
16,2,7729.910256  
16,2,2531.883929  
16,2,2502.788462  
16,2,3479.994048  
16,2,2063.070513  
16,2,3289.630000  
16,2,1536.631579  
16,2,2356.714844  
16,2,1848.712766  
16,2,2042.600000  
16,2,2906.854651  
16,2,1776.845000  
16,2,2742.303191  
16,2,4683.767857  
16,2,5713.461538  
16,2,1602.075000  
16,2,1618.220588  
16,2,4265.354839  
16,2,2253.453125  
16,2,2262.632353  
16,2,2153.798469

16,2,2139.539062  
16,2,2010.936170  
16,2,1507.055000  
16,2,1525.581633  
16,2,1818.250000  
16,2,3266.730556  
16,2,1555.250000  
16,2,2206.500000  
16,2,3616.687500  
16,2,1629.664634  
16,2,2760.010870  
16,2,1769.966346  
16,2,1816.121622  
16,2,1992.125000  
16,2,3402.583333  
16,2,2044.823864  
16,2,1718.798077  
16,2,1569.156250  
16,2,3507.260638  
16,2,1863.024457  
16,2,1708.882353  
16,2,2388.862500  
16,2,1548.947917  
16,2,8509.912500  
16,2,2779.800000  
16,2,3545.091146  
16,2,2261.814394  
16,2,2747.031250  
16,2,2097.256944  
16,2,2079.975410  
16,2,2429.054054  
16,2,2040.792683  
16,2,2077.837209  
16,2,1706.957317  
16,2,1695.333333  
16,2,1987.978723  
16,2,1510.487179  
16,2,1556.800000  
16,2,1633.012195  
16,2,1780.625000  
16,2,2789.058673  
16,2,1919.474576  
16,2,1730.848837  
16,2,2475.454545  
16,2,1895.235795  
16,2,1507.357143  
16,2,2869.839286  
16,2,1683.484472  
16,2,2667.234694  
16,2,3115.245370  
16,2,2110.058824  
16,2,3173.844444  
16,2,2187.554688  
16,2,4575.075472  
16,2,1776.281250  
16,2,2033.525000  
16,2,1727.761905  
16,2,2269.851064  
16,2,2104.852041  
16,2,2409.500000  
16,2,2811.272727  
16,2,3928.171875  
16,2,1589.076923  
16,2,2097.211538  
16,2,1656.015957  
16,2,13185.782895

16,2,1539.328125  
16,2,2132.611111  
16,2,2162.151961  
16,2,2258.625000  
16,2,1783.200000  
16,2,2298.187500  
16,2,2156.046512  
16,2,3920.892857  
16,2,2740.008621  
16,2,1507.088235  
16,2,2348.191489  
16,2,3790.351695  
16,2,13462.551282  
16,2,2264.017500  
16,2,3924.507812  
16,2,1881.884615  
16,2,1780.346154  
16,2,2375.955357  
16,2,1771.808824  
16,2,2140.919643  
16,2,3377.089286  
16,2,2491.625000  
16,2,2916.127717  
16,2,1941.307692  
16,2,1627.900000  
16,2,1607.076531  
16,2,2809.583333  
16,2,3395.606383  
16,2,1540.802326  
16,2,1713.797297  
16,2,8193.678571  
16,2,1992.593023  
16,2,3819.896552  
16,2,1578.944444  
16,2,1686.919643  
16,2,1507.906863  
16,2,2426.500000  
16,2,1725.645833  
16,2,2047.000000  
16,2,3497.750000  
16,2,1769.112245  
16,2,1556.637500  
16,2,1827.416667  
16,2,2613.100000  
16,2,1925.119898  
16,2,1638.377451  
16,2,2280.671512  
16,2,13389.263889  
16,2,1657.435000  
16,2,2417.168478  
16,2,1534.080000  
16,2,1712.235294  
16,2,4706.880000  
16,2,1554.446809  
16,2,1538.094512  
16,2,1622.906250  
16,2,1804.763393  
16,2,2040.208333  
16,2,3039.392361  
16,2,2171.506944  
16,2,2171.137755  
16,2,1830.518382  
16,2,1765.358696  
16,2,3574.485294  
16,2,1606.208333  
16,2,2396.962963

16,2,2142.473404  
16,2,1903.046875  
16,2,1499.710938  
16,2,1650.917614  
16,2,1707.323864  
16,2,1738.852941  
16,2,1913.125000  
16,2,1825.201389  
16,2,1747.518293  
16,2,1576.257979  
16,2,1815.593750  
16,2,5079.250000  
16,2,1677.570312  
16,2,2121.948529  
16,2,2121.652778  
16,2,2980.239286  
16,2,2206.675000  
16,2,1709.782609  
16,2,5395.862245  
16,2,2592.066667  
16,2,5730.985577  
16,2,1746.000000  
16,2,2166.363636  
16,2,1499.696809  
16,2,1712.785714  
16,2,9139.579787  
16,2,3103.973039  
16,2,11468.575000  
16,2,1702.159314  
16,2,3589.970588  
16,2,10037.301829  
16,2,2371.771739  
16,2,1920.465426  
16,2,2073.659483  
16,2,2101.487500  
16,2,1754.384434  
16,2,2280.591912  
16,2,7700.430556  
16,2,1598.337209  
16,2,1949.130682  
16,2,1682.140957  
16,2,4230.002841  
16,2,2271.571429  
16,2,2505.268750  
16,2,2225.066667  
16,2,2247.916667  
16,2,1863.406250  
16,2,2448.000000  
16,2,7237.250000  
16,2,1717.952830  
16,2,2330.476190  
16,2,2407.792553  
16,2,2889.772727  
16,2,1561.561170  
16,2,2947.129870  
16,2,1582.216216  
16,2,2734.401515  
16,2,2519.665816  
16,2,1606.528846  
16,2,2892.790761  
16,2,2705.856250  
16,2,4380.000000  
16,2,1922.697917  
16,2,1577.466346  
16,2,4433.105114  
16,2,5078.604167

16,2,1567.666667  
16,2,3514.979651  
16,2,2074.044872  
16,2,1588.732759  
16,2,2088.017442  
16,2,1619.073171  
16,2,6513.037234  
16,2,1576.531915  
16,2,3047.500000  
16,2,2541.500000  
16,2,2401.164062  
16,2,1723.259259  
16,2,1582.394231  
16,2,1827.807500  
16,2,4209.454268  
16,2,1618.529605  
16,2,1856.771635  
16,2,2715.535714  
16,2,2601.454787  
16,2,1648.180851  
16,2,2153.260870  
16,2,1500.682927  
16,2,2234.647059  
16,2,4511.333333  
16,2,1794.476351  
16,2,1512.197917  
16,2,2453.347826  
16,2,1719.500000  
16,2,1564.225610  
16,2,2464.371795  
16,2,1934.500000  
16,2,2059.009615  
16,2,2819.929245  
16,2,1874.283019  
16,2,2067.948113  
16,2,2001.239130  
16,2,2387.576389  
16,2,2512.095745  
16,2,2231.913690  
16,2,2644.553571  
16,2,2140.114286  
16,2,2046.500000  
16,2,1594.201923  
16,2,2296.578947  
16,2,1909.119565  
16,2,2294.238426  
16,2,2219.367647  
16,2,1892.925000  
16,2,1666.134615  
16,2,3453.557692  
16,2,5010.281250  
16,2,2004.875000  
16,2,3726.273438  
16,2,2251.375000  
16,2,1516.286184  
16,2,1501.114583  
16,2,1551.050000  
16,2,2563.785714  
16,2,1643.250000  
16,2,1516.191489  
16,2,1630.336735  
16,2,1935.383929  
16,2,2738.230769  
16,2,1823.758772  
16,2,1853.621212  
16,2,1735.050000

16,2,1648.946809  
16,2,1647.531250  
16,2,1665.796875  
16,2,2988.899390  
16,2,5407.691964  
16,2,2031.130000  
16,2,2429.201923  
16,2,2558.009615  
16,2,2113.614362  
16,2,2283.136364  
16,2,2405.916667  
16,2,2000.292553  
16,2,1512.064655  
16,2,3485.130682  
16,2,1573.250000  
16,2,1938.218750  
16,2,1577.431579  
16,2,2987.120000  
16,2,3969.500000  
16,2,1846.766667  
16,2,1743.432692  
16,2,3296.913043  
16,2,4482.937500  
16,2,1587.896186  
16,2,1683.775510  
16,2,1864.784314  
16,2,3276.011364  
16,2,2194.238208  
16,2,2548.447115  
16,2,1657.056818  
16,2,2535.880952  
16,2,3719.825472  
16,2,1993.000000  
16,2,1873.584559  
16,2,1895.497396  
16,2,2101.250000  
16,2,3337.510638  
16,2,1885.638889  
16,2,1598.781818  
16,2,14046.944444  
16,2,2111.435000  
16,2,1571.122222  
16,2,2953.531915  
16,2,1585.325000  
16,2,1922.368902  
16,2,2955.478659  
16,2,1767.813830  
16,2,1592.465116  
16,2,4935.144444  
16,2,1811.439024  
16,2,2539.290000  
16,2,1756.713542  
16,2,2688.525000  
16,2,2734.273256  
16,2,2239.600000  
16,2,2182.189286  
16,2,1573.285714  
16,2,1529.651042  
16,2,1775.100000  
16,2,1951.820122  
16,2,4241.631579  
16,2,1506.714286  
16,2,1827.429878  
16,2,2453.150000  
16,2,1623.947917  
16,2,5472.541667

16,2,3654.916667  
16,2,1735.839286  
16,2,2346.847826  
16,2,2136.840000  
16,2,1614.007353  
16,2,2033.200000  
16,2,2913.390957  
16,2,1724.000000  
16,2,3223.644231  
16,2,1698.833333  
16,2,2440.925000  
16,2,2104.672619  
16,2,9244.250000  
16,2,1897.664062  
16,2,19998.702128  
16,2,3253.088983  
16,2,1816.872500  
16,2,1837.622642  
16,2,2729.346154  
16,2,2686.022727  
16,2,2067.031250  
16,2,3131.862500  
16,2,1520.728723  
16,2,1988.299419  
16,2,2383.384615  
16,2,1603.193452  
16,2,2316.474432  
16,2,1706.410256  
16,2,3418.441860  
16,2,3193.968023  
16,2,1659.615132  
16,2,1687.953488  
16,2,1683.987500  
16,2,1776.458333  
16,2,2032.603774  
16,2,2546.419118  
16,2,8314.250000  
16,2,1590.796875  
16,2,2034.547500  
16,2,1761.250000  
16,2,1511.345395  
16,2,1579.388889  
16,2,2342.415816  
16,2,1871.700000  
16,2,3243.375000  
16,2,2161.250000  
16,2,3660.558511  
16,2,2769.241477  
16,2,2351.830000  
16,2,1678.470588  
16,2,1935.817500  
16,2,1678.714286  
16,2,1539.875000  
16,2,3721.372973  
16,2,3171.500000  
16,2,4337.371429  
16,2,3261.601562  
16,2,2108.487805  
16,2,4980.015625  
16,2,1521.596154  
16,2,1563.339623  
16,2,1687.209459  
16,2,2582.457547  
16,2,1771.855769  
16,2,2338.074468  
16,2,1794.545455

16,2,1508.500000  
16,2,1565.156250  
16,2,4349.731544  
16,2,2052.697917  
16,2,1751.570652  
16,2,1506.300000  
16,2,1719.375000  
16,2,1794.685976  
16,2,2862.059524  
16,2,2885.204545  
16,2,5111.544643  
16,2,1868.250000  
16,2,2578.032609  
16,2,3422.781915  
16,2,10658.685976  
16,2,1783.339674  
16,2,1573.633721  
16,2,1573.383929  
16,2,1506.023438  
16,2,1991.357143  
16,2,2365.813725  
16,2,1704.587209  
16,2,2700.638889  
16,2,1899.170213  
16,2,2342.625000  
16,2,2563.043605  
16,2,2304.557927  
16,2,1520.755208  
16,2,1521.681818  
16,2,1785.914062  
16,2,1733.962766  
16,2,1527.593750  
16,2,2384.923077  
16,2,5190.639706  
16,2,1526.435000  
16,2,3511.418182  
16,2,1640.041667  
16,2,1832.021277  
16,2,1591.671875  
16,2,1858.375000  
16,2,3951.909091  
16,2,5280.214286  
16,2,1947.957500  
16,2,3184.446809  
16,2,4444.350543  
16,2,1727.000000  
16,2,1528.000000  
16,2,2281.354545  
16,2,2661.250000  
16,2,2122.652778  
16,2,1504.577128  
16,2,2096.820000  
16,2,1588.089286  
16,2,1548.564189  
16,2,1767.765625  
16,2,2546.524038  
16,2,7364.010417  
16,2,1505.416667  
16,2,2987.572500  
16,2,2268.276596  
16,2,2680.847973  
16,2,4206.434211  
16,2,2896.896739  
16,2,1542.955882  
16,2,6471.428571  
16,2,2014.486486

16,2,2331.606383  
16,2,2055.177885  
16,2,1818.292683  
16,2,1956.563679  
16,2,2366.944149  
16,2,3048.729592  
16,2,1949.500000  
16,2,1655.051887  
16,2,3100.789474  
16,2,1651.891892  
16,2,1971.840426  
16,2,2645.947368  
16,2,1802.792763  
16,2,1858.273437  
16,2,1741.360000  
16,2,1837.600000  
16,2,1782.132075  
16,2,1607.250000  
16,2,2002.870000  
16,2,2463.191038  
16,2,19407.109375  
16,2,1636.075000  
16,2,2291.459184  
16,2,1651.732143  
16,2,2715.991071  
16,2,2338.570312  
16,2,7632.220930  
16,2,3437.441176  
16,2,1734.981707  
16,2,3356.092391  
16,2,2069.015000  
16,2,3451.989796  
16,2,1987.082317  
16,2,17658.307692  
16,2,3728.809211  
16,2,2558.059375  
16,2,1527.062500  
16,2,1767.346875  
16,2,2650.979651  
16,2,2344.275000  
16,2,2557.994681  
16,2,1630.675676  
16,2,3285.850806  
16,2,2218.927083  
16,2,2257.850000  
16,2,2419.500000  
16,2,3597.328947  
16,2,1525.170000  
16,2,1711.102778  
16,2,3041.181818  
16,2,1545.241279  
16,2,1696.750000  
16,2,1818.484043  
16,2,3885.734375  
16,2,2423.534884  
16,2,1591.021739  
16,2,3283.972826  
16,2,2129.000000  
16,2,3200.803571  
16,2,3231.628676  
16,2,2969.988889  
16,2,2521.340909  
16,2,1641.939189  
16,2,2117.325521  
16,2,1621.130952  
16,2,2491.150568

16,2,3498.708333  
16,2,1997.966667  
16,2,2107.372340  
16,2,2553.426471  
16,2,2149.681818  
16,2,2836.238281  
16,2,2246.619048  
16,2,5399.722222  
16,2,1521.115385  
16,2,4316.976744  
16,2,1511.204082  
17,1,1748.446429  
17,1,6087.775000  
17,1,6493.116071  
17,1,5700.878676  
17,1,3206.240385  
17,1,2559.524390  
17,1,2955.511364  
17,1,2376.646739  
17,1,8150.943182  
17,1,18762.595238  
17,1,9448.021739  
17,1,2357.880435  
17,1,2354.333333  
17,1,14446.184783  
17,1,1671.244318  
17,1,1564.920732  
17,1,4854.130435  
17,1,6470.279412  
17,1,8401.142045  
17,1,1766.071429  
17,1,18464.520000  
17,1,4800.362805  
17,1,8342.410000  
17,1,8058.937500  
17,1,2884.182927  
17,1,4144.226562  
17,1,1519.958333  
17,1,1891.719595  
17,1,2303.185096  
17,1,2439.250000  
17,1,8778.333333  
17,1,3037.301471  
17,1,13541.250000  
17,1,12730.473684  
17,1,5430.500000  
17,1,1678.000000  
17,1,13474.375000  
17,1,6866.625000  
17,1,1778.134146  
17,1,4314.134146  
17,1,2371.414634  
17,1,4381.622449  
17,1,13774.043478  
17,1,8401.625000  
17,1,5902.556818  
17,1,7944.930233  
17,1,8883.186170  
17,1,2468.718085  
17,1,2307.010870  
17,1,8446.729911  
17,1,3240.211111  
17,1,4214.160000  
17,1,4025.421053  
17,1,3042.637500  
17,1,6878.826087

17,1,1894.481707  
17,1,2980.765244  
17,1,1839.662500  
17,1,1587.966912  
17,1,13151.369565  
17,1,12332.491667  
17,1,2557.958333  
17,1,3327.235577  
17,1,7743.169811  
17,1,8693.544444  
17,1,1861.119048  
17,1,1733.641304  
17,1,6749.276515  
17,1,2937.950000  
17,1,1680.442857  
17,1,3013.266447  
17,1,10427.096354  
17,1,5066.000000  
17,1,1910.125000  
17,1,4879.521635  
17,1,2808.527344  
17,1,2214.903846  
17,1,1831.987500  
17,1,14059.086735  
17,1,19619.546875  
17,1,3832.746951  
17,1,3260.583333  
17,1,1975.555556  
17,1,1847.108871  
17,1,1943.062500  
17,1,2951.080556  
17,1,2333.656818  
17,1,3336.206081  
17,1,1818.562500  
17,1,6229.496875  
17,1,7271.906977  
17,1,6250.104651  
17,1,12720.145833  
17,1,13070.596875  
17,1,1775.136905  
17,1,1988.326923  
17,1,3903.945122  
17,1,1884.127907  
17,1,3614.031250  
17,1,2242.226190  
17,1,1587.800000  
17,1,3500.140541  
17,1,1671.583333  
17,1,5285.695946  
17,1,1730.262195  
17,1,2214.671512  
17,1,5225.627451  
17,1,1529.375000  
17,1,1723.131579  
17,1,1585.054348  
17,1,10411.517857  
17,1,1951.847222  
17,1,14853.715625  
17,1,4121.250000  
17,1,6169.270270  
17,1,1906.900000  
17,1,1583.735795  
17,1,4847.310096  
17,1,1949.951087  
17,1,2273.253788  
17,1,4638.785714

17,1,3771.025735  
17,1,9133.615385  
17,1,4888.086207  
17,1,1946.111486  
17,1,16538.536184  
17,1,2008.106383  
17,1,4496.386364  
17,1,8571.588816  
17,1,3540.743750  
17,1,16839.315104  
17,1,6131.958333  
17,1,7965.230769  
17,1,15498.951923  
17,1,2055.439024  
17,1,1728.791667  
17,1,2577.666667  
17,1,3439.071429  
17,1,6676.800000  
17,1,11974.986842  
17,1,5486.117647  
17,1,1711.064103  
17,1,7942.111842  
17,1,13382.320312  
17,1,11550.625000  
17,1,1585.048077  
17,1,12949.500000  
17,1,2219.589844  
17,1,3821.610119  
17,1,3874.187500  
17,1,2741.500000  
17,1,2659.104651  
17,1,3102.116071  
17,1,16808.812500  
17,1,7750.698718  
17,1,2982.731707  
17,1,2370.243750  
17,1,4070.750000  
17,1,13080.312500  
17,1,2337.307692  
17,1,5941.750000  
17,1,4950.035714  
17,1,3901.649038  
17,1,2922.127717  
17,1,3484.662879  
17,1,4364.298387  
17,1,2236.522059  
17,1,3409.179878  
17,1,18645.886029  
17,1,1763.544118  
17,1,2509.640244  
17,1,3524.050000  
17,1,2567.779762  
17,1,1886.647059  
17,1,19407.980469  
17,1,7501.954545  
17,1,5642.875000  
17,1,1811.344697  
17,1,2685.000000  
17,1,6184.942308  
17,1,2729.021739  
17,1,1716.350000  
17,1,2100.916667  
17,1,1670.187500  
17,1,4245.892857  
17,1,8734.489796  
17,1,1775.871429

17,1,6767.975610  
17,1,2765.432292  
17,1,3879.187500  
17,1,2421.250000  
17,1,3611.869565  
17,1,4470.380000  
17,1,1612.047794  
17,1,3627.875000  
17,1,10513.750000  
17,1,11616.625000  
17,1,4400.730978  
17,1,1587.755102  
17,1,7484.073718  
17,1,4147.872500  
17,1,10587.236842  
17,1,2860.973684  
17,1,18937.948980  
17,1,5315.470588  
17,1,7997.662500  
17,1,1576.725000  
17,1,4118.466667  
17,1,19752.163462  
17,1,3588.063830  
17,1,12975.869565  
17,1,3600.687500  
17,1,1644.482955  
17,1,7074.805147  
17,1,3537.361702  
17,1,3634.729167  
17,1,5082.858974  
17,1,7030.740741  
17,1,1506.390625  
17,1,4419.845930  
17,1,2371.242347  
17,1,2820.750000  
17,1,1946.841216  
17,1,1506.007979  
17,1,16283.279605  
17,1,6518.093023  
17,1,1904.312500  
17,1,4577.758929  
17,1,7160.819767  
17,1,3179.687500  
17,1,2276.472973  
17,1,1897.085938  
17,1,2853.987805  
17,1,3038.973485  
17,1,3882.411765  
17,1,8610.546875  
17,1,4411.236842  
17,1,13717.180233  
17,1,6174.966981  
17,1,2569.285714  
17,1,1961.111979  
17,1,2554.608333  
17,1,17894.194079  
17,1,2141.300000  
17,1,12256.867647  
17,1,8042.992188  
17,1,6915.637755  
17,1,3327.443182  
17,1,7662.315217  
17,1,2686.141892  
17,1,3536.629630  
17,1,1872.694444  
17,1,1977.959184

17,1,1640.857143  
17,1,14988.256410  
17,1,6542.102273  
17,1,12959.187500  
17,1,2296.764706  
17,1,10339.401316  
17,1,3458.091463  
17,1,1545.660256  
17,1,2015.786184  
17,1,1533.054878  
17,1,4206.183673  
17,1,4647.227273  
17,1,1819.844697  
17,1,15796.125000  
17,1,15335.724359  
17,1,5918.841463  
17,1,2310.780172  
17,1,2257.106618  
17,1,4103.442308  
17,1,13760.390625  
17,1,1815.796875  
17,1,6779.994186  
17,1,1978.685714  
17,1,11821.729730  
17,1,2271.634868  
17,1,2246.527778  
17,1,2125.544118  
17,1,5006.500000  
17,1,8175.971774  
17,1,1658.329545  
17,1,3154.953125  
17,1,2971.640625  
17,1,12093.833333  
17,1,2093.600000  
17,1,1992.404891  
17,1,1845.091346  
17,1,2946.794872  
17,1,5722.750000  
17,1,2087.641667  
17,1,1560.232558  
17,1,1969.744186  
17,1,2739.031250  
17,1,1605.292683  
17,1,1751.920455  
17,1,2250.681818  
17,1,8465.830556  
17,1,1786.037234  
17,1,2263.367188  
17,1,1775.190000  
17,1,2742.500000  
17,1,2146.243902  
17,1,1579.560976  
17,1,10324.666667  
17,1,11021.967105  
17,1,2212.413043  
17,1,2587.500000  
17,1,10808.939024  
17,1,6808.574468  
17,1,15389.250000  
17,1,8164.904412  
17,1,4695.146341  
17,1,1847.936047  
17,1,19226.464744  
17,1,6661.764706  
17,1,2085.053191  
17,1,2013.097826

17,1,3116.448171  
17,1,2964.029605  
17,1,2507.572581  
17,1,8690.000000  
17,1,11377.791667  
17,1,4062.478125  
17,1,1825.205729  
17,1,6257.804878  
17,1,17793.000000  
17,1,1719.757979  
17,1,1730.242424  
17,1,4795.604167  
17,1,1913.812500  
17,1,10234.430556  
17,1,1906.519444  
17,1,8531.906250  
17,1,3414.478261  
17,1,2149.864865  
17,1,3224.402439  
17,1,3095.564103  
17,1,18011.271277  
17,1,14462.659091  
17,1,2626.106383  
17,1,1597.307692  
17,1,3015.413043  
17,1,11169.375000  
17,1,3281.353659  
17,1,12948.000000  
17,1,1663.931818  
17,1,5908.383333  
17,1,18403.514423  
17,1,2214.894886  
17,1,1633.122340  
17,1,2629.263158  
17,1,4589.064815  
17,1,8985.750000  
17,1,1852.616477  
17,1,3053.025000  
17,1,3250.037879  
17,1,5984.222656  
17,1,2469.834302  
17,1,6454.869186  
17,1,7275.916667  
17,1,2985.000000  
17,1,18058.889535  
17,1,1694.344595  
17,1,5339.146341  
17,1,7535.250000  
17,1,8262.727564  
17,1,2389.375000  
17,1,2918.636364  
17,1,2526.970109  
17,1,4602.028125  
17,1,11707.145349  
17,1,1664.993243  
17,1,5460.727273  
17,1,12010.965909  
17,1,2132.425532  
17,1,3724.821429  
17,1,7127.596774  
17,1,12943.564286  
17,1,8841.855769  
17,1,2535.932927  
17,1,9944.191489  
17,1,7435.734694  
17,1,17166.852941

17,1,5751.789474  
17,1,15950.312500  
17,1,2424.411585  
17,1,1519.746212  
17,1,7955.000000  
17,1,5330.654412  
17,1,4323.383721  
17,1,8661.017857  
17,1,5115.492647  
17,1,2345.382353  
17,1,1752.456731  
17,1,4677.383929  
17,1,17303.651515  
17,1,1683.541667  
17,1,13184.151786  
17,1,3361.303191  
17,1,9539.269231  
17,1,3047.187500  
17,1,6978.277500  
17,1,1609.546875  
17,1,1756.708333  
17,1,12842.718750  
17,1,2111.608108  
17,1,8687.480000  
17,1,1679.088235  
17,1,4028.916667  
17,1,4651.230769  
17,1,2736.215278  
17,1,2623.515152  
17,1,2883.750000  
17,1,4004.437500  
17,1,3858.048780  
17,1,4256.524038  
17,1,15575.307692  
17,1,2424.928571  
17,1,5392.258065  
17,1,7805.329787  
17,1,11033.375000  
17,1,5008.262821  
17,1,6830.500000  
17,1,4526.951923  
17,1,9297.135417  
17,1,9045.483333  
17,1,2601.388889  
17,1,9566.397059  
17,1,2761.962766  
17,1,10199.284375  
17,1,10727.062500  
17,1,2352.841912  
17,1,13908.420000  
17,1,9751.875000  
17,1,2655.312500  
17,1,2656.426630  
17,1,3121.708333  
17,1,6095.156250  
17,1,4226.229167  
17,1,1611.087838  
17,1,2304.482143  
17,1,4611.185484  
17,1,7307.565789  
17,1,4409.164062  
17,1,3100.277778  
17,1,3686.256098  
17,1,3241.468750  
17,1,19394.450000  
17,1,4851.419118

17,1,2316.319444  
17,1,1649.524194  
17,1,2826.367647  
17,1,2055.502778  
17,1,2718.547619  
17,1,8378.525641  
17,1,3115.346154  
17,1,2967.945312  
17,1,3878.821429  
17,1,15315.250000  
17,1,1665.000000  
17,1,3274.488971  
17,1,4873.426471  
17,1,12314.576923  
17,1,1732.328488  
17,1,3872.937500  
17,1,3952.178571  
17,1,5442.500000  
17,1,17872.966981  
17,1,1903.219512  
17,1,5014.018750  
17,1,9149.104167  
17,1,2169.054348  
17,1,14432.000000  
17,1,2579.738971  
17,1,3670.206522  
17,1,4225.260870  
17,1,10390.768293  
17,1,10790.908163  
17,1,3154.796512  
17,1,7021.898026  
17,1,8323.080128  
17,1,3609.285714  
17,1,3758.585526  
17,1,9444.553571  
17,1,5075.207031  
17,1,3710.765306  
17,1,2625.121795  
17,1,5552.859756  
17,1,4418.162162  
17,1,1875.042553  
17,1,4820.488971  
17,1,2886.190972  
17,1,2757.492424  
17,1,5203.303922  
17,1,2249.136364  
17,1,5596.050000  
17,1,19626.174528  
17,1,5794.477941  
17,1,5793.037879  
17,1,14714.378906  
17,1,17129.687500  
17,1,3946.714286  
17,1,1957.474359  
17,1,1646.102778  
17,1,1825.608696  
17,1,1983.260417  
17,1,2037.875000  
17,1,3857.347826  
17,1,12907.114583  
17,1,2689.125000  
17,1,3354.909375  
17,1,4629.282895  
17,1,2189.472973  
17,1,2271.978723  
17,1,6838.153226

17,1,19072.750000  
17,1,4435.000000  
17,1,1778.664062  
17,1,3496.263158  
17,1,3370.446970  
17,1,2703.921875  
17,1,11984.502907  
17,1,1643.717949  
17,1,10263.005952  
17,1,2042.942308  
17,1,1855.545139  
17,1,2785.200000  
17,1,1903.059211  
17,1,4356.458333  
17,1,2284.485714  
17,1,1720.221154  
17,1,5337.260638  
17,1,6630.502841  
17,1,4401.384615  
17,1,7753.037500  
17,1,6821.714286  
17,1,5190.201613  
17,1,2193.914062  
17,1,4188.966667  
17,1,9261.214286  
17,1,2248.375000  
17,1,3082.024390  
17,1,3166.875000  
17,1,3683.557927  
17,1,7488.562500  
17,1,3539.512195  
17,1,2463.285714  
17,1,17714.500000  
17,1,2031.789062  
17,1,5100.175781  
17,1,3918.509146  
17,1,2618.868421  
17,1,3765.906250  
17,1,2415.615385  
17,1,3337.826087  
17,1,4911.024390  
17,1,10534.541667  
17,1,1681.500000  
17,1,3889.800000  
17,1,4000.442857  
17,1,2328.423077  
17,1,8119.200000  
17,1,14029.663043  
17,1,2374.593750  
17,1,3858.096875  
17,1,1910.181818  
17,1,9215.663462  
17,1,4143.625000  
17,1,3139.851562  
17,1,5335.069767  
17,1,3467.649306  
17,1,8370.578947  
17,1,2487.125000  
17,1,1946.452381  
17,1,2918.363636  
17,1,2664.115385  
17,1,7280.920455  
17,1,10914.722222  
17,1,3037.017045  
17,1,3435.386364  
17,1,17880.646429

17,1,2941.526316  
17,1,1739.255814  
17,1,4201.676471  
17,1,1517.975806  
17,1,5077.370192  
17,1,7366.509146  
17,1,1666.000000  
17,1,6338.808824  
17,1,2751.089286  
17,1,2638.769231  
17,1,6934.551020  
17,1,5226.700000  
17,1,2143.619318  
17,1,1777.378049  
17,1,5240.458333  
17,1,2524.836735  
17,1,4647.790698  
17,1,3931.898026  
17,1,2018.872340  
17,1,15825.447368  
17,1,12813.446023  
17,1,5691.026596  
17,1,2330.968023  
17,1,2097.421875  
17,1,2304.784722  
17,1,1942.000000  
17,1,3031.276786  
17,1,5084.083333  
17,1,13660.284091  
17,1,9655.586207  
17,1,4560.819853  
17,1,8425.933824  
17,1,4375.273438  
17,1,2675.800000  
17,1,8046.157143  
17,1,3425.776163  
17,1,4885.625000  
17,1,5216.224265  
17,1,1799.593750  
17,1,2660.236486  
17,1,3156.090909  
17,1,18837.097561  
17,1,1697.796053  
17,1,6048.962500  
17,1,2283.135000  
17,1,6767.522727  
17,1,2368.338816  
17,1,5380.730769  
17,1,10778.731707  
17,1,10379.461957  
17,1,3443.935897  
17,1,2172.431250  
17,1,1910.600000  
17,1,1830.888158  
17,1,2633.666667  
17,1,5701.589744  
17,1,9954.088710  
17,1,5647.354167  
17,1,2916.731132  
17,1,18705.870968  
17,1,4795.916667  
17,1,3131.714286  
17,1,2921.627907  
17,1,8176.315341  
17,1,4375.150000  
17,1,3228.987179

17,1,2840.666667  
17,1,1761.993902  
17,1,2589.005952  
17,1,2406.465000  
17,1,1727.866071  
17,1,3488.932143  
17,1,6676.147727  
17,1,1522.015306  
17,1,4991.846591  
17,1,2531.396552  
17,1,15158.410256  
17,1,3770.677885  
17,1,1941.394231  
17,1,3829.657407  
17,1,1716.187500  
17,1,3123.634146  
17,1,6670.762019  
17,1,3517.575581  
17,1,5118.525735  
17,1,2490.450000  
17,1,4890.203125  
17,1,1754.937500  
17,1,4736.053571  
17,1,4417.358974  
17,1,4938.734848  
17,1,18205.052632  
17,1,16096.461538  
17,1,1804.363636  
17,1,9421.315625  
17,1,2712.765306  
17,1,4549.989362  
17,1,6166.964286  
17,1,9696.881250  
17,1,1981.224490  
17,1,7563.867647  
17,1,2352.791667  
17,1,2686.625000  
17,1,1796.116279  
17,1,2205.580882  
17,1,1785.878049  
17,1,6095.166667  
17,1,2944.191176  
17,1,2275.072222  
17,1,3311.148810  
17,1,3081.983696  
17,1,3546.756098  
17,1,1883.750000  
17,1,3418.909091  
17,1,5746.088415  
17,1,2240.437500  
17,1,1878.671053  
17,1,9656.980263  
17,1,4073.000000  
17,1,7526.923913  
17,1,7153.180288  
17,1,4048.191667  
17,1,1895.868056  
17,1,8418.003049  
17,1,2091.336957  
17,1,4236.986842  
17,1,12114.110294  
17,1,2790.421053  
17,1,2301.678571  
17,1,3906.671053  
17,1,1951.848684  
17,1,9925.000000

17,1,9664.679348  
17,1,2686.111413  
17,1,1842.500000  
17,1,5077.508152  
17,1,6667.410714  
17,1,3937.447368  
17,1,7592.425926  
17,1,2437.325758  
17,1,5516.363095  
17,1,17223.587121  
17,1,8204.923077  
17,1,2015.875000  
17,1,2841.720395  
17,1,5307.520270  
17,1,9992.361111  
17,1,4478.795455  
17,1,2907.000000  
17,1,3793.076389  
17,1,12628.160000  
17,1,5786.628049  
17,1,2307.454545  
17,1,10228.772727  
17,1,2691.316176  
17,1,5879.882653  
17,1,2302.343023  
17,1,6401.180851  
17,1,3925.852273  
17,1,10075.228571  
17,1,3423.500000  
17,1,7312.294643  
17,1,12382.639706  
17,1,1847.384146  
17,1,8903.506579  
17,1,4191.581731  
17,1,2119.250000  
17,1,1626.773810  
17,1,2166.277778  
17,1,4590.241071  
17,1,2567.942308  
17,1,8207.083333  
17,1,1917.019231  
17,1,2579.333333  
17,1,5540.884146  
17,1,2167.500000  
17,1,1730.458333  
17,1,4100.657895  
17,1,2265.446429  
17,1,1686.861702  
17,1,3809.790698  
17,1,1677.365385  
17,1,2097.306818  
17,1,4912.184211  
17,1,3894.236111  
17,1,2358.337500  
17,1,8588.127660  
17,1,2204.988281  
17,1,1847.609375  
17,1,2516.575000  
17,1,12065.595238  
17,1,5466.719388  
17,1,3268.668367  
17,1,15135.372340  
17,1,15056.795732  
17,1,15995.375000  
17,1,7681.513158  
17,1,4285.170732

17,1,5065.766892  
17,1,3350.602273  
17,1,2999.196429  
17,1,13275.711538  
17,1,6360.351351  
17,1,2123.728261  
17,1,1550.702381  
17,1,1732.575000  
17,1,2139.987500  
17,1,7270.600000  
17,1,2172.434783  
17,1,2126.148026  
17,1,11093.762195  
17,1,10502.875000  
17,1,8150.465625  
17,1,2371.000000  
17,1,3623.495098  
17,1,3203.119048  
17,1,2750.197674  
17,1,19173.972656  
17,1,4424.121094  
17,1,1890.065789  
17,1,11656.242188  
17,1,9519.285714  
17,1,4655.609756  
17,1,1772.904762  
17,1,2147.375000  
17,1,5532.617188  
17,1,4714.771277  
17,1,18685.935714  
17,1,2542.337209  
17,1,8756.358974  
17,1,10700.409722  
17,1,3588.691489  
17,1,18165.000000  
17,1,3407.560976  
17,1,1854.431250  
17,1,2901.000000  
17,1,5967.409091  
17,1,1862.360000  
17,1,2087.867788  
17,1,3640.687500  
17,1,6791.451220  
17,1,7656.179487  
17,1,3694.839286  
17,1,1559.015306  
17,1,2068.593750  
17,1,4635.284091  
17,1,2626.500000  
17,1,2151.243902  
17,1,17378.234043  
17,1,11280.416667  
17,1,4278.275000  
17,1,5450.243243  
17,1,2047.550000  
17,1,8092.785000  
17,1,5308.637500  
17,1,5240.392857  
17,1,13438.269444  
17,1,3311.375000  
17,1,1598.203804  
17,1,1561.500000  
17,1,1865.760135  
17,1,6810.915441  
17,1,6332.725000  
17,1,2922.500000

17,1,1924.924242  
17,1,13942.640625  
17,1,5689.796875  
17,1,1748.461538  
17,1,1893.408654  
17,1,3161.885714  
17,1,4556.646341  
17,1,3894.400000  
17,1,2525.875000  
17,1,1803.854167  
17,1,11019.632353  
17,1,15181.974265  
17,1,3482.298780  
17,1,19785.503472  
17,1,5465.464286  
17,1,13635.418605  
17,1,1748.256579  
17,1,2494.803191  
17,1,13211.120690  
17,1,5757.000000  
17,1,1534.385417  
17,1,2442.439516  
17,1,2975.829787  
17,1,2876.812500  
17,1,7031.938953  
17,1,3354.321429  
17,1,12464.733333  
17,1,1678.725000  
17,1,4096.458333  
17,1,6469.904412  
17,1,10441.381579  
17,1,5857.487903  
17,1,2059.212766  
17,1,8316.135135  
17,1,5422.345588  
17,1,3698.744565  
17,1,17736.125000  
17,1,4897.935976  
17,1,4951.902439  
17,1,2841.357143  
17,1,2955.191489  
17,1,2971.625000  
17,1,2163.069767  
17,1,1624.353659  
17,1,5178.475000  
17,1,2621.633333  
17,1,11107.780488  
17,1,3830.878571  
17,1,1532.937500  
17,1,4017.190789  
17,1,3121.285714  
17,1,2694.000000  
17,1,2529.958333  
17,1,1783.790698  
17,1,5215.900510  
17,1,7569.914634  
17,1,9484.319853  
17,1,12775.652778  
17,1,2286.943878  
17,1,6856.475000  
17,1,4183.409091  
17,1,7323.174342  
17,1,5671.636364  
17,1,2414.875000  
17,1,5477.600000  
17,1,17797.150568

17,1,3500.788462  
17,1,4531.847973  
17,1,10954.500000  
17,1,3841.584135  
17,1,2395.592391  
17,1,7890.956522  
17,1,6140.939655  
17,1,4813.588235  
17,1,2109.875000  
17,1,1968.204545  
17,1,7778.311047  
17,1,1831.843750  
17,1,5685.419118  
17,1,17807.894737  
17,1,7119.272727  
17,1,2709.973837  
17,1,1744.076613  
17,1,5936.083333  
17,1,7794.602273  
17,1,2494.823171  
17,1,2909.531250  
17,1,1758.850000  
17,1,6013.602941  
17,1,8759.211538  
17,1,4615.801471  
17,1,8975.000000  
17,1,1706.742188  
17,1,1760.750000  
17,1,1728.743902  
17,1,2663.394231  
17,1,10345.625000  
17,1,2187.937500  
17,1,9697.575000  
17,1,1554.800781  
17,1,1833.152344  
17,1,1539.301020  
17,1,19650.613095  
17,1,1794.075658  
17,1,4350.456818  
17,1,3069.366477  
17,1,11765.781250  
17,1,7459.678030  
17,1,3983.450758  
17,1,4851.166667  
17,1,2295.375000  
17,1,5862.753676  
17,1,9820.689024  
17,1,2192.425676  
17,1,8937.119048  
17,1,5605.646739  
17,1,2847.264706  
17,1,7482.601744  
17,1,2832.062500  
17,1,6076.486842  
17,1,5004.287234  
17,1,12427.171875  
17,1,5749.333333  
17,1,2235.437500  
17,1,4847.298780  
17,1,10405.315625  
17,1,8834.818182  
17,1,5627.852941  
17,1,5718.476562  
17,1,8065.756757  
17,1,10651.137500  
17,1,2022.375000

17,1,5261.823529  
17,1,1914.290441  
17,1,9771.000000  
17,1,1665.488636  
17,1,13137.298077  
17,1,18320.678571  
17,1,8388.044355  
17,1,2060.756757  
17,1,8583.410714  
17,1,1954.864865  
17,1,1547.375000  
17,1,6976.497340  
17,1,5812.411111  
17,1,2048.625000  
17,1,1546.276596  
17,1,1590.142857  
17,1,10386.615385  
17,1,3404.651163  
17,1,2951.802326  
17,1,5573.759615  
17,1,1928.310345  
17,1,2626.300000  
17,1,1588.605769  
17,1,1835.825000  
17,1,2405.320652  
17,1,17622.875000  
17,1,1825.369048  
17,1,8410.985465  
17,1,1968.425000  
17,1,6651.269231  
17,1,6965.421875  
17,1,2614.631410  
17,1,1709.597826  
17,1,5397.937500  
17,1,10492.088235  
17,1,1895.831250  
17,1,2345.662736  
17,1,3419.264706  
17,1,1589.953125  
17,1,3196.580645  
17,1,5309.187500  
17,1,1691.500000  
17,1,14683.105114  
17,1,4157.894231  
17,1,10656.705357  
17,1,9895.642857  
17,1,5421.143293  
17,1,8768.232143  
17,1,19137.886029  
17,1,4348.818182  
17,1,8448.880556  
17,1,19216.666667  
17,1,5095.733333  
17,1,2150.625000  
17,1,2042.325000  
17,1,10410.228125  
17,1,6327.625000  
17,1,3746.597222  
17,1,3735.717949  
17,1,3166.252660  
17,1,2786.250000  
17,1,7114.068750  
17,1,7773.323529  
17,1,3701.015306  
17,1,5774.727273  
17,1,12572.594828

17,1,3366.826220  
17,1,2677.583333  
17,1,2564.875000  
17,1,14688.980769  
17,1,3005.649390  
17,1,2893.916667  
17,1,2598.029605  
17,1,1923.782051  
17,1,1519.770833  
17,1,2948.608696  
17,1,7663.302419  
17,1,1919.060976  
17,1,9441.678571  
17,1,5687.803571  
17,1,2594.812500  
17,1,4616.589286  
17,1,1932.218750  
17,1,9692.692308  
17,1,14013.022727  
17,1,8494.634615  
17,1,3887.338235  
17,1,18455.297872  
17,1,1730.475000  
17,1,9614.884615  
17,1,8073.884615  
17,1,1539.106383  
17,1,2581.693182  
17,1,1727.750000  
17,1,11578.750000  
17,1,16097.421053  
17,1,2687.133333  
17,1,3599.268293  
17,1,7297.144737  
17,1,8437.267442  
17,1,1834.985294  
17,1,4619.187500  
17,1,17238.089623  
17,1,17482.875000  
17,1,4176.306604  
17,1,4428.375000  
17,1,1721.448276  
17,1,5037.466146  
17,1,2723.000000  
17,1,2463.264535  
17,1,19321.767857  
17,1,1822.174419  
17,1,1836.569444  
17,1,5146.018750  
17,1,3625.710227  
17,1,5404.255319  
17,1,2695.017045  
17,1,1942.416667  
17,1,6559.392857  
17,1,5151.795455  
17,1,3048.611111  
17,1,3144.777778  
17,1,3733.479167  
17,1,4136.897436  
17,1,3090.943750  
17,1,1688.484043  
17,1,8442.145161  
17,1,4386.912162  
17,1,2649.202381  
17,1,7476.592391  
17,1,8283.698171  
17,1,9918.070312

17,1,3840.451923  
17,1,15499.475000  
17,1,8949.862069  
17,1,7062.513393  
17,1,3296.125000  
17,1,1916.125000  
17,1,10228.712500  
17,1,1720.828947  
17,1,1988.256579  
17,1,1602.413690  
17,1,4450.954545  
17,1,1549.460938  
17,1,3337.419118  
17,1,5836.425532  
17,1,3973.152027  
17,1,1783.755814  
17,1,3014.157609  
17,1,4738.500000  
17,1,2014.307692  
17,1,2565.018868  
17,1,4370.597500  
17,1,2705.346154  
17,1,13464.411765  
17,1,11671.792411  
17,1,1620.353659  
17,1,16317.551020  
17,1,4533.375000  
17,1,3017.285714  
17,1,9291.840116  
17,1,1715.884868  
17,1,2150.125000  
17,1,2695.707317  
17,1,4713.043478  
17,1,3851.398810  
17,1,3215.158654  
17,1,1781.466667  
17,1,2642.453488  
17,1,1997.818750  
17,1,10851.439655  
17,1,5946.562500  
17,1,2682.080128  
17,1,2901.264706  
17,1,1934.833333  
17,1,8823.138889  
17,1,3685.853659  
17,1,2192.500000  
17,1,1598.838816  
17,1,8811.696875  
17,1,14292.565217  
17,1,5273.250000  
17,1,3842.888021  
17,1,1599.187500  
17,1,1551.184783  
17,1,4954.333333  
17,1,6003.875000  
17,1,9241.581081  
17,1,6686.090000  
17,1,2799.952381  
17,1,1964.031250  
17,1,4753.779255  
17,1,14252.867647  
17,1,5112.000000  
17,1,4075.000000  
17,1,1506.365625  
17,1,3850.875000  
17,1,8107.695122

17,1,12184.475000  
17,1,2021.839474  
17,1,2031.655172  
17,1,1933.968750  
17,1,11014.897727  
17,1,12739.329545  
17,1,2519.487500  
17,1,3498.783333  
17,1,8691.170732  
17,1,3230.773026  
17,1,4206.128205  
17,1,1591.875000  
17,1,1945.267442  
17,1,2710.281915  
17,1,5174.900000  
17,1,9053.514706  
17,1,4931.477564  
17,1,4135.636364  
17,1,5639.000000  
17,1,18222.437500  
17,1,6221.245690  
17,1,1633.244898  
17,1,2367.771739  
17,1,3949.391026  
17,1,3971.344444  
17,1,11110.371094  
17,1,1787.665179  
17,1,1620.150568  
17,1,2173.335366  
17,1,2197.337838  
17,1,1970.920455  
17,1,6514.413043  
17,1,1740.872340  
17,1,8532.539286  
17,1,4500.136364  
17,1,1592.258929  
17,1,3058.422619  
17,1,2655.558140  
17,1,3944.926829  
17,1,4402.824074  
17,1,4685.553571  
17,1,1686.579268  
17,1,2466.231707  
17,1,4166.011029  
17,1,13000.059524  
17,1,1510.250000  
17,1,18606.678571  
17,1,16303.261905  
17,1,4794.095238  
17,1,1973.561224  
17,1,2115.948171  
17,1,4315.634615  
17,1,6149.590909  
17,1,1515.197222  
17,1,6414.330357  
17,1,1548.390244  
17,1,16642.493902  
17,1,4118.521277  
17,1,1968.729167  
17,1,1544.291667  
17,1,3617.460227  
17,1,1607.649038  
17,1,3491.854167  
17,1,2359.209184  
17,1,6797.500000  
17,1,5302.085526

17,1,6115.825758  
17,1,5604.954545  
17,1,4200.200000  
17,1,2494.615854  
17,1,2686.794118  
17,1,11314.219512  
17,1,2241.684211  
17,1,8263.660714  
17,1,2454.572115  
17,1,7966.700000  
17,1,5712.156250  
17,1,2168.563953  
17,1,6534.349432  
17,1,6927.918919  
17,1,4645.595930  
17,1,7442.951220  
17,1,3652.195652  
17,1,11508.462121  
17,1,1511.058333  
17,1,4802.050000  
17,1,2118.562500  
17,1,12248.324324  
17,1,14855.792683  
17,1,3651.202703  
17,1,2446.085227  
17,1,3458.250000  
17,1,7597.205882  
17,1,6423.127451  
17,1,6493.513587  
17,1,2024.057692  
18,2,2655.860294  
18,2,2449.682692  
18,2,3447.152439  
18,2,1733.734375  
18,2,1531.549342  
18,2,1750.584906  
18,2,1609.905488  
18,2,2196.285714  
18,2,1949.712264  
18,2,2854.616379  
18,2,2275.940789  
18,2,2250.562500  
18,2,2859.924107  
18,2,1662.016304  
18,2,1562.339286  
18,2,2098.399038  
18,2,4104.296875  
18,2,5565.603774  
18,2,2004.208333  
18,2,6533.117647  
18,2,1975.390244  
18,2,1896.085526  
18,2,3300.309278  
18,2,1673.962963  
18,2,1951.375000  
18,2,1746.319712  
18,2,18125.458333  
18,2,1851.538462  
18,2,2429.934211  
18,2,2928.057692  
18,2,1587.389881  
18,2,1651.395408  
18,2,1536.132212  
18,2,1965.278409  
18,2,2104.796875  
18,2,3630.890244

18,2,1582.762500  
18,2,2929.354651  
18,2,1514.656250  
18,2,3444.558140  
18,2,2087.960784  
18,2,2071.900000  
18,2,1613.493421  
18,2,3006.195312  
18,2,1940.109375  
18,2,1635.929878  
18,2,2052.136364  
18,2,1990.979167  
18,2,1568.625000  
18,2,1513.558594  
18,2,1942.725490  
18,2,2490.177632  
18,2,2452.762755  
18,2,1876.026042  
18,2,6179.576271  
18,2,3246.439698  
18,2,2366.422297  
18,2,2005.319767  
18,2,2099.750000  
18,2,7514.388587  
18,2,1947.328804  
18,2,2231.052778  
18,2,7405.146635  
18,2,4825.622283  
18,2,1625.068182  
18,2,2937.408163  
18,2,8268.147436  
18,2,1640.556034  
18,2,2153.875000  
18,2,2144.771739  
18,2,2314.815217  
18,2,2520.666667  
18,2,1601.887195  
18,2,3472.222222  
18,2,2256.142857  
18,2,1771.163265  
18,2,2011.988827  
18,2,1646.337209  
18,2,2900.418269  
18,2,1938.981771  
18,2,4325.815476  
18,2,1588.411932  
18,2,2336.335106  
18,2,1689.547486  
18,2,3799.473214  
18,2,4395.761905  
18,2,2039.266827  
18,2,2223.309659  
18,2,2597.354167  
18,2,1903.426136  
18,2,2290.771739  
18,2,2696.906250  
18,2,3375.000000  
18,2,1874.793103  
18,2,11148.752155  
18,2,1831.180000  
18,2,1779.244444  
18,2,2525.691176  
18,2,1938.781250  
18,2,1511.777778  
18,2,1546.944444  
18,2,1642.925926

18,2,1543.970443  
18,2,1916.500000  
18,2,1555.409091  
18,2,1837.556548  
18,2,2644.250000  
18,2,2818.493421  
18,2,1642.483696  
18,2,2697.746622  
18,2,2293.539773  
18,2,5562.216463  
18,2,1935.750000  
18,2,2037.750000  
18,2,1833.541667  
18,2,1606.857143  
18,2,1609.176020  
18,2,2137.118056  
18,2,3188.897500  
18,2,3835.800000  
18,2,1631.927083  
18,2,3104.375000  
18,2,1775.406977  
18,2,1962.457317  
18,2,1506.827206  
18,2,3032.122159  
18,2,2309.962500  
18,2,1580.244318  
18,2,4911.578947  
18,2,1952.208333  
18,2,1602.137255  
18,2,2382.744048  
18,2,2863.396226  
18,2,2335.301724  
18,2,2481.137755  
18,2,2306.469828  
18,2,1941.984375  
18,2,6849.078947  
18,2,4094.557692  
18,2,2517.415094  
18,2,1560.491848  
18,2,2724.266484  
18,2,1574.058511  
18,2,1667.354592  
18,2,7105.169118  
18,2,2619.428977  
18,2,1896.067935  
18,2,2658.505682  
18,2,1982.406977  
18,2,5018.911765  
18,2,2251.988208  
18,2,1612.869565  
18,2,2656.553030  
18,2,3819.818750  
18,2,2477.827128  
18,2,3040.206897  
18,2,1732.551282  
18,2,2939.780702  
18,2,1535.678191  
18,2,2391.175000  
18,2,2384.734848  
18,2,3402.918605  
18,2,1515.112805  
18,2,17857.135000  
18,2,2556.250000  
18,2,1604.744186  
18,2,1602.105405  
18,2,16978.596154

18,2,2455.808333  
18,2,2721.357143  
18,2,2117.816327  
18,2,1567.382353  
18,2,3401.520000  
18,2,2455.317708  
18,2,1523.389706  
18,2,10466.560606  
18,2,1763.756757  
18,2,1659.953125  
18,2,1663.135000  
18,2,2964.524390  
18,2,2478.352500  
18,2,2996.460938  
18,2,2981.500000  
18,2,13460.351562  
18,2,1728.811321  
18,2,2781.988636  
18,2,1604.812500  
18,2,4118.034091  
18,2,1534.000000  
18,2,1520.957447  
18,2,1780.000000  
18,2,2801.582888  
18,2,2450.675000  
18,2,2483.676471  
18,2,2493.578125  
18,2,4294.344444  
18,2,1734.250000  
18,2,1825.378378  
18,2,1679.541667  
18,2,1563.187500  
18,2,2297.057692  
18,2,1726.577778  
18,2,2734.112069  
18,2,3981.886364  
18,2,1899.666667  
18,2,4555.482422  
18,2,3770.325980  
18,2,1556.283333  
18,2,2118.976562  
18,2,1815.860000  
18,2,3445.803571  
18,2,1965.434783  
18,2,2462.793103  
18,2,2994.823529  
18,2,1615.727273  
18,2,3421.236111  
18,2,1598.451613  
18,2,5472.290323  
18,2,1581.666667  
18,2,1649.650000  
18,2,2675.188776  
18,2,2820.867647  
18,2,1535.539773  
18,2,2137.000000  
18,2,3090.141304  
18,2,2170.011111  
18,2,1854.660377  
18,2,2829.988095  
18,2,1809.857143  
18,2,2497.052083  
18,2,2428.940000  
18,2,2433.163462  
18,2,3568.889706  
18,2,3086.885135

18,2,2388.540541  
18,2,1627.875000  
18,2,1622.637195  
18,2,1850.231707  
18,2,2179.702381  
18,2,2326.370000  
18,2,2050.460227  
18,2,3822.689024  
18,2,2557.878289  
18,2,1582.121429  
18,2,1686.546875  
18,2,1549.200581  
18,2,1909.664634  
18,2,2122.896552  
18,2,1916.350000  
18,2,1823.240854  
18,2,1765.513889  
18,2,3783.599138  
18,2,1919.551829  
18,2,1809.659091  
18,2,2321.265909  
18,2,1945.054545  
18,2,2673.351744  
18,2,2998.732143  
18,2,10249.057143  
18,2,1822.207547  
18,2,2943.826923  
18,2,2150.163462  
18,2,1859.173913  
18,2,1957.937500  
18,2,1725.140704  
18,2,1820.818182  
18,2,1813.235849  
18,2,2543.025641  
18,2,3178.214286  
18,2,1499.450549  
18,2,1872.619048  
18,2,12563.115741  
18,2,2384.196429  
18,2,3763.822222  
18,2,1916.023256  
18,2,1615.200000  
18,2,2032.414773  
18,2,3477.806548  
18,2,2023.298611  
18,2,1836.352941  
18,2,1762.983108  
18,2,1529.924528  
18,2,3027.590909  
18,2,4587.638021  
18,2,1547.916667  
18,2,2941.657895  
18,2,2000.905488  
18,2,2255.429825  
18,2,2468.421875  
18,2,7050.006383  
18,2,1584.250000  
18,2,1610.908088  
18,2,2789.948276  
18,2,5077.232955  
18,2,1504.354167  
18,2,3173.401042  
18,2,1539.125000  
18,2,2646.465909  
18,2,1683.849057  
18,2,1917.666667

18,2,2292.925000  
18,2,1860.500000  
18,2,1806.094828  
18,2,2202.649306  
18,2,2885.951087  
18,2,1955.037500  
18,2,1626.451087  
18,2,1972.500000  
18,2,2146.796875  
18,2,2399.840426  
18,2,1803.250000  
18,2,1587.212121  
18,2,1686.255319  
18,2,1945.017361  
18,2,1547.750000  
18,2,1833.600694  
18,2,1692.808824  
18,2,2733.395349  
18,2,1704.071023  
18,2,2068.650000  
18,2,5087.386719  
18,2,1540.019231  
18,2,1628.423077  
18,2,2591.034722  
18,2,4615.068182  
18,2,4699.950000  
18,2,1859.625000  
18,2,4202.981132  
18,2,6316.843750  
18,2,2528.970588  
18,2,2925.509804  
18,2,5018.981250  
18,2,3178.875000  
18,2,2140.353659  
18,2,1981.058140  
18,2,2413.247685  
18,2,1841.443878  
18,2,6012.942308  
18,2,1830.050000  
18,2,1658.631944  
18,2,2272.460784  
18,2,2059.347561  
18,2,1532.125000  
18,2,2129.718750  
18,2,2141.618750  
18,2,2872.857143  
18,2,2047.583333  
18,2,1593.646667  
18,2,2173.359756  
18,2,1579.627717  
18,2,1802.688776  
18,2,2255.490854  
18,2,5650.069444  
18,2,2409.681818  
18,2,2710.907895  
18,2,1865.453125  
18,2,2094.675926  
18,2,2688.585784  
18,2,4927.508152  
18,2,1528.706731  
18,2,2594.527778  
18,2,2885.885870  
18,2,1966.114583  
18,2,2403.616071  
18,2,1808.367347  
18,2,2622.820000

18,2,2045.228723  
18,2,1568.327830  
18,2,1742.730000  
18,2,2658.336898  
18,2,2829.148148  
18,2,4000.575658  
18,2,1514.466667  
18,2,1903.912162  
18,2,2251.870000  
18,2,2018.130435  
18,2,1833.653846  
18,2,2681.316860  
18,2,2251.115385  
18,2,2559.863636  
18,2,1501.732143  
18,2,1868.894737  
18,2,1735.332237  
18,2,2496.361111  
18,2,2690.000000  
18,2,1693.755556  
18,2,1564.330729  
18,2,1591.145349  
18,2,2029.431373  
18,2,3559.948370  
18,2,1622.200000  
18,2,2281.000000  
18,2,1991.812500  
18,2,1686.442308  
18,2,16217.269608  
18,2,2432.181818  
18,2,3823.957447  
18,2,3391.977500  
18,2,1696.525641  
18,2,1655.671429  
18,2,1612.770349  
18,2,1852.886792  
18,2,1519.827500  
18,2,1602.013298  
18,2,1811.690341  
18,2,1810.591667  
18,2,1834.062500  
18,2,2152.823529  
18,2,13023.734694  
18,2,5410.476562  
18,2,1519.337838  
18,2,2787.274457  
18,2,1556.000000  
18,2,1784.272727  
18,2,1703.102273  
18,2,4152.196078  
18,2,2950.156250  
18,2,2455.020833  
18,2,1958.878049  
18,2,2023.886029  
18,2,1847.264706  
18,2,3768.280488  
18,2,1598.358871  
18,2,4076.846154  
18,2,2339.163265  
18,2,3236.275000  
18,2,3769.378571  
18,2,2807.000000  
18,2,1740.553191  
18,2,1859.970238  
18,2,1733.037037  
18,2,1729.141129

18,2,1618.481250  
18,2,2972.102941  
18,2,2010.197674  
18,2,1613.194444  
18,2,2889.250000  
18,2,2098.190476  
18,2,2410.823276  
18,2,1554.529412  
18,2,2017.348018  
18,2,1822.868421  
18,2,2115.583333  
18,2,1991.656250  
18,2,2013.673913  
18,2,1559.875000  
18,2,1833.381579  
18,2,5639.244792  
18,2,2726.964744  
18,2,2044.525510  
18,2,1511.219512  
18,2,2770.577703  
18,2,1521.060897  
18,2,2835.571429  
18,2,3404.743590  
18,2,2576.500000  
18,2,2244.891892  
18,2,2465.036585  
18,2,1825.601415  
18,2,2249.735849  
18,2,1709.507075  
18,2,1884.365385  
18,2,1674.342262  
18,2,3073.489362  
18,2,2237.856250  
18,2,3383.471591  
18,2,2284.334906  
18,2,1506.029605  
18,2,2286.271635  
18,2,2017.908163  
18,2,1765.446429  
18,2,5611.583333  
18,2,1846.314286  
18,2,2442.731771  
18,2,2621.343023  
18,2,1964.752404  
18,2,1583.418182  
18,2,1859.767442  
18,2,2376.646341  
18,2,2392.500000  
18,2,2073.062500  
18,2,1669.903125  
18,2,4760.187500  
18,2,2551.989362  
18,2,3297.000000  
18,2,1868.931818  
18,2,1539.795455  
18,2,3152.380208  
18,2,2762.592672  
18,2,2510.692308  
18,2,2276.358974  
18,2,1619.025000  
18,2,2444.522727  
18,2,2518.762238  
18,2,7286.648936  
18,2,1646.204545  
18,2,2168.592593  
18,2,1841.655000

18,2,2095.736607  
18,2,1607.489362  
18,2,2437.618902  
18,2,2165.969388  
18,2,3656.522727  
18,2,1609.000000  
18,2,1801.117647  
18,2,6018.222222  
18,2,1650.321429  
18,2,1509.677419  
18,2,3717.500000  
18,2,2769.672297  
18,2,1505.796875  
18,2,2770.285714  
18,2,1891.346939  
18,2,4532.651163  
18,2,1607.090625  
18,2,1969.330000  
18,2,3749.118056  
18,2,1969.104167  
18,2,1725.436170  
18,2,1549.156863  
18,2,2141.289773  
18,2,2451.015625  
18,2,2296.645161  
18,2,8567.616379  
18,2,1543.178571  
18,2,1609.653302  
18,2,1789.608974  
18,2,2464.018293  
18,2,2095.427500  
18,2,2652.543981  
18,2,1844.419118  
18,2,2167.250000  
18,2,1522.285714  
18,2,5685.614796  
18,2,3294.791667  
18,2,1565.687500  
18,2,2051.296512  
18,2,1620.833333  
18,2,1544.442708  
18,2,2108.750000  
18,2,1989.160000  
18,2,2665.308511  
18,2,3922.960784  
18,2,3014.556818  
18,2,2045.700000  
18,2,5094.735294  
18,2,3065.355114  
18,2,1830.625000  
18,2,2539.448370  
18,2,3287.507979  
18,2,1593.303125  
18,2,1609.491279  
18,2,2254.169118  
18,2,1533.175000  
18,2,2399.579268  
18,2,4745.195122  
18,2,2047.568750  
18,2,1912.280000  
18,2,2537.428571  
18,2,3079.000000  
18,2,15764.843750  
18,2,1767.131944  
18,2,1528.057692  
18,2,2539.614583

18,2,2631.679245  
18,2,3482.242291  
18,2,1710.656250  
18,2,1563.820513  
18,2,4114.285714  
18,2,2176.780488  
18,2,1731.716667  
18,2,2425.299451  
18,2,3560.054878  
18,2,2183.000000  
18,2,4346.303977  
18,2,1656.668919  
18,2,1722.756098  
18,2,1607.286585  
18,2,1521.679348  
18,2,1741.235577  
18,2,1564.525000  
18,2,1511.372449  
18,2,1571.817073  
18,2,2476.294118  
18,2,2243.755102  
18,2,3265.183824  
18,2,3635.625000  
18,2,3210.510638  
18,2,2394.375000  
18,2,1626.657738  
18,2,2582.287791  
18,2,2595.254167  
18,2,1606.212766  
18,2,1556.765244  
18,2,1982.805556  
18,2,2166.632353  
18,2,2327.780612  
18,2,2050.250000  
18,2,3135.804687  
18,2,2011.636905  
18,2,1991.978723  
18,2,1577.244186  
18,2,1618.528226  
18,2,2561.704787  
18,2,1609.285714  
18,2,3172.565217  
18,2,2159.595745  
18,2,1716.349057  
18,2,2229.979651  
18,2,1685.289474  
18,2,2319.267857  
18,2,2425.140625  
18,2,3602.791667  
18,2,3897.980769  
18,2,4060.009434  
18,2,2304.453125  
18,2,1574.806604  
18,2,3567.073113  
18,2,2663.972222  
18,2,3953.526316  
18,2,4188.130000  
18,2,1512.382212  
18,2,5449.028061  
18,2,1731.017442  
18,2,1888.976974  
18,2,1557.487179  
18,2,3392.345000  
18,2,1612.800000  
18,2,2707.679487  
18,2,2199.809659

18,2,1619.277273  
18,2,1814.341463  
18,2,2128.625000  
18,2,2503.483333  
18,2,1643.529762  
18,2,2141.073529  
18,2,1913.034314  
18,2,1857.085714  
18,2,1573.177083  
18,2,2199.701923  
18,2,3154.455000  
18,2,2083.755000  
18,2,3134.203488  
18,2,2560.285714  
18,2,1961.538889  
18,2,1551.312500  
18,2,1704.034091  
18,2,2359.533088  
18,2,2236.051724  
18,2,2271.913690  
18,2,2476.002907  
18,2,2332.457447  
18,2,2959.239583  
18,2,2056.170213  
18,2,2034.967500  
18,2,2438.648026  
18,2,2332.393750  
18,2,2555.715278  
18,2,2202.000000  
18,2,2278.037037  
18,2,2699.271277  
18,2,3052.389706  
18,2,3133.646635  
18,2,3878.195000  
18,2,1780.315217  
18,2,2456.562500  
18,2,7002.458333  
18,2,1804.500000  
18,2,1538.260000  
18,2,1996.904255  
18,2,1743.148649  
18,2,3611.424419  
18,2,2757.512931  
18,2,1797.011628  
18,2,2333.252717  
18,2,2566.235294  
18,2,1568.364362  
18,2,2686.725000  
18,2,4932.203947  
18,2,1500.267500  
18,2,1596.028125  
18,2,2842.593750  
18,2,3234.558824  
18,2,2779.908163  
18,2,1804.025735  
18,2,2138.638514  
18,2,1933.207589  
18,2,2813.033537  
18,2,2169.187500  
18,2,2922.877358  
18,2,1631.510638  
18,2,2175.731132  
18,2,1693.695652  
18,2,2240.354911  
18,2,2721.776596  
18,2,2752.176471

18,2,2232.977041  
18,2,3854.781250  
18,2,2745.821809  
18,2,2080.040865  
18,2,2503.075581  
18,2,1840.091912  
18,2,1827.926829  
18,2,3072.459821  
18,2,1896.413690  
18,2,1739.108108  
18,2,1943.290179  
18,2,4615.750000  
18,2,1899.589674  
18,2,3298.397959  
18,2,1904.530612  
18,2,1612.298780  
18,2,2248.669811  
18,2,1876.275000  
18,2,2744.798077  
18,2,2198.052356  
18,2,2847.350000  
18,2,2001.475000  
18,2,1861.692500  
18,2,1541.806818  
18,2,1939.152174  
18,2,1605.000000  
18,2,4401.187500  
18,2,2014.152439  
18,2,2368.345238  
18,2,1573.335227  
18,2,2324.280702  
18,2,1942.638298  
18,2,1783.600000  
18,2,2801.785714  
18,2,1806.555556  
18,2,1598.962963  
18,2,2360.242647  
18,2,1906.569149  
18,2,2420.292453  
18,2,2188.000000  
18,2,1568.928571  
18,2,1817.354839  
18,2,2861.587500  
18,2,1837.615385  
18,2,1767.647727  
18,2,1846.110465  
18,2,1533.476744  
18,2,3846.048077  
18,2,3110.122093  
18,2,2277.825472  
18,2,2042.423077  
18,2,1925.829268  
18,2,4522.413462  
18,2,2837.070755  
18,2,1947.335227  
18,2,1900.406250  
18,2,1981.425000  
18,2,5468.895833  
18,2,1504.250000  
18,2,3406.852941  
18,2,1855.461538  
18,2,2736.855263  
18,2,2011.433824  
18,2,1584.431818  
18,2,1513.594595  
18,2,6883.229167

18,2,6292.391827  
18,2,1782.723837  
18,2,4057.923077  
18,2,2408.458333  
18,2,2003.823529  
18,2,1504.502907  
18,2,12920.133333  
18,2,1777.329787  
18,2,1937.808511  
18,2,1921.520833  
18,2,2132.021429  
18,2,2046.031250  
18,2,2031.791667  
18,2,1600.740566  
18,2,3487.440789  
18,2,2028.383929  
18,2,1533.963415  
18,2,3364.161458  
18,2,2757.019531  
18,2,2334.602273  
18,2,1594.882653  
18,2,1512.462766  
18,2,2191.872881  
18,2,1713.502358  
18,2,1883.729032  
18,2,4026.718750  
18,2,1539.311111  
18,2,2005.037500  
18,2,2513.566176  
18,2,1942.455556  
18,2,2869.583333  
18,2,2115.452586  
18,2,1502.318627  
18,2,1808.000000  
18,2,2527.904605  
18,2,2153.767857  
18,2,1583.576389  
18,2,1867.141361  
18,2,1610.923077  
18,2,3853.442857  
18,2,2761.500000  
18,2,1933.318966  
18,2,15534.833333  
18,2,13309.709091  
18,2,2415.930233  
18,2,1565.500000  
18,2,2888.301829  
18,2,1771.274457  
18,2,2020.478261  
18,2,3315.089744  
18,2,3468.821429  
18,2,3323.825000  
18,2,3532.598684  
18,2,12468.950000  
18,2,2234.247549  
18,2,1664.453488  
18,2,3023.285377  
18,2,1502.878378  
18,2,2679.888889  
18,2,1651.790865  
18,2,4649.790000  
18,2,2143.734694  
18,2,1720.009868  
18,2,2539.585106  
18,2,1563.959459  
18,2,6714.274457

18,2,2694.612745  
18,2,2710.585366  
18,2,1657.992308  
18,2,1553.700000  
18,2,2451.865385  
18,2,2244.127451  
18,2,3269.928571  
18,2,2989.160000  
18,2,1952.260417  
18,2,1714.287879  
18,2,1864.988095  
18,2,2631.895833  
18,2,2781.443750  
18,2,2721.544118  
18,2,2721.125000  
18,2,1816.136364  
18,2,1555.732759  
18,2,4190.769737  
18,2,4992.562500  
18,2,2031.500000  
18,2,13949.730769  
18,2,1850.750000  
18,2,1546.445312  
18,2,4477.105263  
18,2,1624.200000  
18,2,1835.858696  
18,2,2870.800595  
18,2,2188.962963  
18,2,2445.941860  
18,2,12562.451923  
18,2,1768.049020  
18,2,1587.901786  
18,2,1507.257812  
18,2,2490.216216  
18,2,2841.747642  
18,2,1534.260870  
18,2,2151.541667  
18,2,1781.459302  
18,2,2249.510135  
18,2,1966.785714  
18,2,1830.133929  
18,2,1975.000000  
18,2,3588.672414  
18,2,2122.349515  
18,2,1656.670673  
18,2,1550.737179  
18,2,2201.680556  
18,2,2102.768617  
18,2,4174.400000  
18,2,2505.279412  
18,2,8488.173913  
18,2,1830.958333  
18,2,1506.804348  
18,2,4659.810096  
18,2,1707.945122  
18,2,1898.790698  
18,2,6230.886792  
18,2,1771.858553  
18,2,6058.530612  
18,2,1906.263514  
18,2,6301.971154  
18,2,2338.483871  
18,2,2235.430233  
18,2,2105.058140  
18,2,2302.307692  
18,2,1639.280488

18,2,1753.526316  
18,2,3584.524510  
18,2,1814.786458  
18,2,1705.943750  
18,2,4180.322368  
18,2,2445.895652  
18,2,2355.215909  
18,2,6905.141509  
18,2,1805.957237  
18,2,1921.163462  
18,2,2306.480978  
18,2,6520.311364  
18,2,4760.972973  
18,2,1572.863636  
18,2,2037.000000  
18,2,2263.405488  
18,2,3676.854167  
18,2,1651.743056  
18,2,1654.082500  
18,2,2579.576087  
18,2,4255.970588  
18,2,1996.686170  
18,2,2595.139881  
18,2,2782.316176  
18,2,1833.840625  
18,2,4436.370968  
18,2,2034.599057  
18,2,1576.240385  
18,2,1858.165909  
18,2,2845.000000  
18,2,1565.265625  
18,2,2572.210000  
18,2,1713.834459  
18,2,1574.909375  
18,2,1746.454082  
18,2,2276.854545  
18,2,1685.679348  
18,2,1865.760000  
18,2,3283.704545  
18,2,1615.646635  
18,2,1632.360577  
18,2,1590.729167  
18,2,7109.687500  
18,2,3458.609043  
18,2,2546.276316  
18,2,2309.708333  
18,2,9656.544643  
18,2,2114.545918  
18,2,2445.037791  
18,2,2013.203125  
18,2,15726.425532  
18,2,2787.181818  
18,2,3050.933333  
18,2,2742.300000  
18,2,5262.681818  
18,2,1637.603659  
18,2,2433.573604  
18,2,2433.937500  
18,2,1888.550000  
18,2,1853.676471  
18,2,1730.833333  
18,2,4242.750000  
18,2,2018.833333  
18,2,2648.700000  
18,2,3442.317073  
18,2,1987.647059

18,2,2259.712209  
18,2,1705.000000  
18,2,1728.892857  
18,2,1526.937500  
18,2,1714.206522  
18,2,1677.167411  
18,2,2583.815000  
18,2,3185.937500  
18,2,2455.333333  
18,2,2019.119048  
18,2,1563.721875  
18,2,1503.208333  
18,2,1569.670213  
18,2,1508.750000  
18,2,2885.180851  
18,2,2320.220455  
18,2,2063.865385  
18,2,1499.026316  
18,2,3598.090625  
18,2,3365.041667  
18,2,1560.428571  
18,2,1562.180000  
18,2,2348.383333  
18,2,2733.161765  
18,2,2591.506410  
18,2,1974.094340  
18,2,2888.662500  
18,2,1512.836735  
18,2,3120.829545  
18,2,3900.137712  
18,2,1507.084270  
18,2,6385.166667  
18,2,5304.530612  
18,2,2793.654412  
18,2,3145.534884  
18,2,1966.781690  
18,2,3197.542553  
18,2,3098.283163  
18,2,1917.036638  
18,2,2091.465278  
18,2,2107.605000  
18,2,1687.700000  
18,2,1929.973214  
18,2,2451.469595  
18,2,1943.355263  
18,2,2783.065789  
18,2,6829.500000  
18,2,2339.914894  
18,2,3458.750000  
18,2,1537.107500  
18,2,3173.971591  
18,2,2104.500000  
18,2,5360.493056  
18,2,2252.926724  
18,2,1513.551471  
18,2,5366.101562  
18,2,4512.076923  
18,2,1812.578125  
18,2,3887.252273  
18,2,1937.128205  
18,2,2013.375000  
18,2,2727.445946  
18,2,1703.132075  
18,2,1776.938679  
18,2,2991.880319  
18,2,1963.153061

18,2,1977.692708  
18,2,6342.170213  
18,2,2477.642857  
18,2,8773.062500  
18,2,2010.854167  
18,2,1563.808333  
18,2,2074.914773  
18,2,1926.187500  
18,2,1939.468085  
18,2,2736.060000  
18,2,5261.202778  
18,2,3861.787234  
18,2,1931.250000  
18,2,1523.618902  
18,2,2591.437500  
18,2,3051.380952  
18,2,4126.923077  
18,2,2189.515000  
18,2,2332.551020  
18,2,1896.955556  
18,2,2235.700000  
18,2,2503.185714  
18,2,1502.031250  
18,2,1743.928571  
18,2,1656.800000  
18,2,2672.000000  
18,2,1755.882979  
18,2,3676.476415  
18,2,3244.421875  
18,2,2536.861111  
18,2,1717.750000  
18,2,1858.455882  
18,2,2524.462264  
18,2,1941.347222  
18,2,1889.976974  
18,2,2658.083333  
18,2,1852.759615  
18,2,3161.340000  
18,2,4914.175676  
18,2,2827.000000  
18,2,10608.315789  
18,2,7463.383621  
18,2,1788.043750  
18,2,4915.952703  
18,2,3049.890625  
18,2,2956.270349  
18,2,2315.761111  
18,2,1975.918478  
18,2,6014.831395  
18,2,3555.076923  
18,2,5401.607143  
18,2,9089.575000  
18,2,1775.733945  
18,2,3993.204787  
18,2,2464.429245  
18,2,2224.881250  
18,2,2470.262755  
18,2,2891.842365  
18,2,1734.496795  
18,2,4473.765957  
18,2,2433.069519  
18,2,1985.482143  
18,2,1695.811111  
18,2,1649.880319  
18,2,4048.180556  
18,2,1770.850000

18,2,7778.506944  
18,2,2382.401786  
18,2,1810.570000  
18,2,2583.673246  
18,2,1520.378378  
18,2,3787.723404  
18,2,1695.200000  
18,2,7086.292857  
18,2,1965.900000  
18,2,2654.966667  
18,2,2886.476351  
18,2,2155.875000  
18,2,1781.058673  
18,2,1643.882353  
18,2,1738.926829  
18,2,4310.810345  
18,2,7531.306818  
18,2,3011.714286  
18,2,2620.500000  
18,2,1609.290865  
18,2,2274.085938  
18,2,1546.467391  
18,2,3099.437500  
18,2,1800.216837  
18,2,2946.832386  
18,2,2593.010638  
18,2,7352.617021  
18,2,1721.703488  
18,2,1611.490854  
18,2,3399.607843  
18,2,1727.000000  
18,2,1766.077273  
18,2,1870.959184  
18,2,2079.060000  
18,2,1585.423077  
18,2,6487.802632  
18,2,2204.692308  
18,2,1587.146875  
18,2,3283.153846  
18,2,1854.541667  
18,2,3342.594595  
18,2,2251.062500  
18,2,9152.704787  
18,2,2996.843750  
18,2,2369.410000  
18,2,1799.475000  
18,2,2505.306250  
18,2,1591.974057  
18,2,2210.689189  
18,2,2354.583333  
18,2,1876.260870  
18,2,2107.159574  
18,2,3130.220930  
18,2,4817.159091  
18,2,2242.984043  
18,2,2273.617647  
18,2,2233.615000  
18,2,3897.930233  
18,2,1685.401316  
18,2,8131.165625  
18,2,2804.255556  
18,2,2830.052632  
18,2,2734.404762  
18,2,9302.942935  
18,2,5348.750000  
18,2,1557.279412

18,2,2103.470745  
18,2,2594.360000  
18,2,2647.838068  
18,2,1738.609756  
18,2,3553.471939  
18,2,1850.558140  
18,2,1588.733333  
18,2,1977.587500  
18,2,1843.529412  
18,2,2032.107143  
18,2,1854.655629  
18,2,2289.952830  
18,2,1768.949405  
18,2,1541.153846  
18,2,5378.200000  
18,2,2239.128125  
18,2,1880.750000  
18,2,2051.048077  
18,2,1707.046296  
18,2,2738.880952  
18,2,2392.767045  
18,2,4337.250000  
18,2,1826.058824  
18,2,2422.882353  
18,2,1613.062500  
18,2,4394.207317  
18,2,2032.581081  
18,2,1617.858696  
18,2,1820.750000  
18,2,1526.393443  
18,2,1956.000000  
18,2,6375.810976  
18,2,2063.461538  
18,2,1627.441406  
18,2,2922.265152  
18,2,1766.375000  
18,2,4838.930921  
18,2,2682.429245  
18,2,2438.156250  
18,2,1742.567568  
18,2,1898.892857  
18,2,2307.478723  
18,2,2676.704545  
18,2,4201.883333  
18,2,1551.163462  
18,2,1931.013158  
18,2,2191.349057  
18,2,2293.800000  
18,2,5713.812500  
18,2,2381.355556  
18,2,2160.593085  
18,2,2095.538043  
18,2,1663.224490  
18,2,1973.435897  
18,2,3005.944079  
18,2,4447.903409  
18,2,2719.340625  
18,2,1990.256579  
18,2,1747.858696  
18,2,4485.245902  
18,2,2148.033333  
18,2,1813.801630  
18,2,2198.846154  
18,2,1978.463235  
18,2,1760.625000  
18,2,1854.228365

18,2,4449.187500  
18,2,1908.390909  
18,2,1866.500000  
18,2,2639.810000  
18,2,5956.926829  
18,2,2146.963068  
18,2,2229.510204  
18,2,3382.197368  
18,2,2693.437500  
18,2,1696.803191  
18,2,1863.250000  
18,2,5689.702703  
18,2,3093.463889  
18,2,3569.720000  
18,2,3181.689189  
18,2,2234.881818  
18,2,2375.767857  
18,2,3655.344512  
18,2,10724.000000  
18,2,3149.177778  
18,2,1574.837209  
18,2,1518.045455  
18,2,2198.509615  
18,2,3309.000000  
18,2,2271.405303  
18,2,4977.479167  
18,2,1611.547872  
18,2,5571.827957  
18,2,4750.325472  
18,2,1576.326923  
18,2,2647.910714  
18,2,1732.800000  
18,2,16101.820000  
18,2,2127.750000  
18,2,1775.178571  
18,2,2780.160714  
18,2,1794.638298  
18,2,1734.226744  
18,2,1549.557692  
18,2,1907.923780  
18,2,8153.328804  
18,2,2996.554348  
18,2,3205.226667  
18,2,2092.089744  
18,2,1542.638889  
18,2,2426.205357  
18,2,1758.680851  
18,2,1630.988636  
18,2,2598.158163  
18,2,2351.000000  
18,2,2280.154070  
18,2,5796.986111  
18,2,1882.562500  
18,2,1754.769231  
18,2,1510.825000  
18,2,1501.824468  
18,2,2295.169271  
18,2,1857.025510  
18,2,1799.196759  
18,2,2997.250000  
18,2,9331.276163  
18,2,2590.414286  
18,2,2137.869565  
18,2,1746.212500  
18,2,1886.177778  
18,2,2608.703125

18,2,1821.201220  
18,2,1780.718750  
18,2,1751.240642  
18,2,3651.478261  
18,2,1884.000000  
18,2,11727.907609  
18,2,2248.323529  
18,2,2044.657895  
18,2,1795.963889  
18,2,1677.285256  
18,2,1748.875000  
18,2,1654.016026  
18,2,2127.544118  
18,2,2111.717949  
18,2,11964.000000  
18,2,2117.844595  
18,2,1800.776316  
18,2,5914.593750  
18,2,1728.371951  
18,2,1975.736364  
18,2,2785.158333  
18,2,11910.843023  
18,2,1747.035714  
18,2,1774.120192  
18,2,1509.453125  
18,2,1546.380952  
18,2,1714.192857  
18,2,1538.572917  
18,2,1784.967262  
18,2,2659.994444  
18,2,2404.456522  
18,2,1792.163636  
18,2,2359.319444  
18,2,3657.937500  
18,2,2519.314286  
18,2,1687.875000  
18,2,8610.595000  
18,2,2240.721154  
18,2,3031.366492  
18,2,2524.164671  
18,2,12483.893617  
18,2,5245.105263  
18,2,2029.166667  
18,2,7088.172794  
18,2,1618.264205  
18,2,2275.122093  
18,2,1625.092391  
18,2,1525.875000  
18,2,1755.792453  
18,2,1649.633065  
18,2,8735.750000  
18,2,1696.333333  
18,2,2004.053125  
18,2,2335.997093  
18,2,16735.291667  
18,2,1531.000000  
18,2,1591.119792  
18,2,2993.922222  
18,2,2971.023256  
18,2,14179.333333  
18,2,1518.801630  
18,2,2912.305556  
18,2,2014.885417  
18,2,1802.044118  
18,2,4452.566327  
18,2,1653.433036

18,2,1738.627273  
18,2,1807.867424  
18,2,1781.750000  
18,2,2904.242347  
18,2,1738.265306  
18,2,2183.828125  
18,2,2202.189189  
18,2,1655.870283  
18,2,1704.157895  
18,2,2695.116848  
18,2,17035.618243  
18,2,3655.318878  
18,2,1653.700000  
18,2,2660.936170  
18,2,6857.815789  
18,2,3156.520833  
18,2,1893.113839  
18,2,2306.502907  
18,2,1773.621711  
18,2,3490.464286  
18,2,1546.697917  
18,2,2138.439286  
18,2,1689.114130  
18,2,2665.684524  
18,2,1813.506250  
18,2,2337.206731  
18,2,3446.381944  
18,2,2686.270408  
18,2,4863.045455  
18,2,2127.875000  
18,2,2433.528302  
18,2,5378.826705  
18,2,2281.901961  
18,2,8561.342949  
18,2,1588.109375  
18,2,2225.946429  
18,2,2132.282609  
18,2,1502.968750  
18,2,5496.163462  
18,2,2795.984043  
18,2,3006.772321  
18,2,1556.959677  
18,2,1675.209677  
18,2,4547.215116  
18,2,6322.750000  
18,2,2522.423611  
18,2,1946.169271  
18,2,3315.897959  
18,2,1859.863372  
18,2,4524.910828  
18,2,7965.562500  
18,2,3614.828947  
18,2,1931.452703  
18,2,2540.656977  
18,2,2376.004902  
18,2,3441.500000  
18,2,2740.573864  
18,2,1878.119048  
18,2,1739.343085  
18,2,3424.220588  
18,2,1620.461957  
18,2,1837.847222  
18,2,1523.041667  
18,2,2156.702830  
18,2,1513.187500  
18,2,1976.165094

18,2,1624.750000  
18,2,1879.991071  
18,2,1615.908163  
18,2,1914.735849  
18,2,2471.938776  
18,2,1712.061170  
18,2,2306.901316  
18,2,7594.745968  
18,2,2173.877551  
18,2,2068.162500  
18,2,5402.700000  
18,2,1625.302632  
18,2,2163.350000  
18,2,1530.038462  
18,2,2001.653226  
18,2,1851.708333  
18,2,2092.500000  
18,2,3918.481250  
18,2,1735.510638  
18,2,2490.568182  
18,2,3229.716981  
18,2,1918.897059  
18,2,3163.679245  
18,2,2026.430147  
18,2,1542.298780  
18,2,3549.956250  
18,2,2116.584416  
18,2,1686.207317  
18,2,4575.227273  
18,2,4966.313679  
18,2,2394.000000  
18,2,11342.461538  
18,2,1890.095000  
18,2,2806.307065  
18,2,2588.145492  
18,2,1995.538462  
18,2,2079.736111  
18,2,4511.305556  
18,2,1921.698370  
18,2,1861.842262  
18,2,2139.360577  
18,2,19397.693182  
18,2,1698.915625  
18,2,2274.151515  
18,2,9956.375000  
18,2,2150.306122  
18,2,2474.731771  
18,2,1912.011364  
18,2,3824.229167  
18,2,3098.535326  
18,2,2278.555556  
18,2,2022.906250  
18,2,1555.059783  
18,2,1520.095588  
18,2,3051.409091  
18,2,2583.049020  
18,2,2427.897959  
18,2,2383.740741  
18,2,2118.250000  
18,2,1738.235795  
18,2,4398.625000  
18,2,2661.265957  
18,2,3075.428571  
18,2,2625.681818  
18,2,1528.919271  
18,2,3882.444149

18,2,3968.061364  
18,2,1697.845395  
18,2,2135.517045  
18,2,3174.085526  
18,2,1903.736111  
18,2,1955.307692  
18,2,7716.431122  
18,2,1788.606250  
18,2,2272.914216  
18,2,1939.647059  
18,2,1609.479651  
18,2,3263.043367  
18,2,2241.945652  
18,2,2235.571429  
18,2,2215.593750  
18,2,2331.151042  
18,2,1571.375000  
18,2,2230.625000  
18,2,1558.077128  
18,2,1730.855769  
18,2,18456.721774  
18,2,2746.948718  
18,2,2931.472727  
18,2,3394.180556  
18,2,2478.390625  
18,2,17637.000000  
18,2,5121.848684  
18,2,2504.218085  
18,2,3935.921296  
18,2,2298.937500  
18,2,2978.682143  
18,2,2581.931818  
18,2,2315.652174  
18,2,1812.625000  
18,2,3419.250000  
18,2,2035.435185  
18,2,1726.468085  
18,2,2704.541667  
18,2,1952.859296  
18,2,1540.250000  
18,2,1716.862745  
18,2,2813.711538  
18,2,2192.142857  
18,2,1698.360294  
18,2,1792.159091  
18,2,4807.456633  
18,2,1837.375000  
18,2,3110.406250  
18,2,1930.934211  
18,2,1537.328488  
18,2,2053.232143  
18,2,13624.615385  
18,2,2367.394737  
18,2,2387.234043  
18,2,1870.000000  
18,2,3175.553191  
18,2,2108.780556  
18,2,2202.313679  
18,2,1651.159091  
18,2,2714.375000  
18,2,2503.285714  
18,2,2827.500000  
18,2,2427.673913  
18,2,1661.933155  
18,2,2225.687500  
18,2,2320.500000

18,2,1544.375000  
18,2,2584.948370  
18,2,2618.000000  
18,2,2202.060000  
18,2,1686.305851  
18,2,2730.465426  
18,2,1582.342105  
18,2,1597.731707  
18,2,2251.667614  
18,2,1971.084135  
18,2,2302.294118  
18,2,1693.877551  
18,2,1556.500000  
18,2,1953.323113  
18,2,2170.056818  
18,2,2254.757500  
18,2,2135.750000  
18,2,1836.941860  
18,2,1715.555556  
18,2,1658.464286  
18,2,1507.671196  
18,2,1971.505102  
18,2,1936.093137  
18,2,1944.567308  
18,2,2349.495000  
18,2,1992.210648  
18,2,4800.916667  
18,2,2763.664894  
18,2,1525.845395  
18,2,2983.744318  
18,2,3435.319149  
18,2,1650.304688  
18,2,1695.113208  
18,2,2470.938776  
18,2,1564.278409  
18,2,1886.114130  
18,2,1681.607143  
18,2,3997.352041  
18,2,3507.927778  
18,2,1680.500000  
18,2,2157.484375  
18,2,2577.027778  
18,2,1961.600000  
18,2,3620.980392  
18,2,1510.433673  
18,2,2712.812500  
18,2,1797.955000  
18,2,2432.703704  
18,2,1656.337500  
18,2,1584.441860  
18,2,1584.875000  
18,2,3727.808962  
18,2,5291.101562  
18,2,1553.214286  
18,2,2960.860000  
18,2,1884.531250  
18,2,2624.690476  
18,2,2793.189189  
18,2,2478.020408  
18,2,2083.200000  
18,2,2094.575000  
18,2,1789.518519  
18,2,2001.513089  
18,2,2139.519231  
18,2,2397.458333  
18,2,2965.708333

18,2,3171.235294  
18,2,8937.851562  
18,2,2411.900000  
18,2,1652.710526  
18,2,1640.821429  
18,2,4508.605263  
18,2,1692.916667  
18,2,1636.214286  
18,2,1731.514881  
18,2,12238.000000  
18,2,1546.759868  
18,2,2012.081395  
18,2,2614.830000  
18,2,10910.199219  
18,2,1892.218182  
18,2,2622.348214  
18,2,1620.886792  
18,2,2345.424020  
18,2,1543.861111  
18,2,1978.606707  
18,2,2225.260638  
18,2,2374.790909  
18,2,2524.091837  
18,2,1522.783784  
18,2,2108.439024  
18,2,3234.740000  
18,2,1823.686047  
18,2,2072.579861  
18,2,4275.340909  
18,2,5959.833333  
18,2,1898.250000  
18,2,1693.666667  
18,2,1509.025735  
18,2,2826.468750  
18,2,2919.535714  
18,2,3611.115385  
18,2,1743.195652  
18,2,1626.359375  
18,2,3760.653409  
18,2,2081.693878  
18,2,1698.445652  
18,2,2487.133929  
18,2,2470.345000  
18,2,1548.727778  
18,2,3265.455556  
18,2,1885.653846  
18,2,1636.627193  
18,2,1920.120536  
18,2,1867.716146  
18,2,1545.304348  
18,2,2713.616279  
18,2,2362.051282  
18,2,1605.400000  
18,2,3472.372549  
18,2,2555.593750  
18,2,2233.552632  
18,2,2308.957237  
18,2,2424.482143  
18,2,2219.581250  
18,2,1675.222222  
18,2,2777.000000  
18,2,2283.770833  
18,2,5475.472973  
18,2,1880.000000  
18,2,2251.823980  
18,2,2989.186047

18,2,1583.117647  
18,2,4564.788889  
18,2,12763.269444  
18,2,1591.551829  
18,2,1853.171875  
18,2,2031.583333  
18,2,9136.457447  
18,2,2259.921875  
18,2,2079.875000  
18,2,8512.703125  
18,2,1668.233491  
18,2,2890.534884  
18,2,2890.357843  
18,2,1551.963855  
18,2,1739.675481  
18,2,4256.175926  
18,2,3029.880000  
18,2,2587.867187  
18,2,1684.274457  
18,2,3305.892857  
18,2,1502.718750  
18,2,5051.694444  
18,2,2475.290000  
18,2,3737.559783  
18,2,5519.723404  
18,2,1641.000000  
18,2,1713.433140  
18,2,1696.500000  
18,2,1870.003125  
18,2,1530.692308  
18,2,1726.505435  
18,2,2025.708333  
18,2,1966.142500  
18,2,4771.133333  
18,2,4909.077586  
18,2,2280.889706  
18,2,3999.652174  
18,2,3075.511628  
18,2,1961.595745  
18,2,1637.549020  
18,2,2249.196078  
18,2,2533.049020  
18,2,1983.414474  
18,2,1993.262500  
18,2,3820.669811  
18,2,1918.811321  
18,2,2729.678571  
18,2,1722.123656  
18,2,1771.819444  
18,2,1951.331250  
18,2,1758.542553  
18,2,2318.280660  
18,2,2556.602564  
18,2,1530.217105  
18,2,1674.635870  
18,2,1681.728261  
18,2,2014.472222  
18,2,2065.164062  
18,2,1790.343750  
18,2,2189.127119  
18,2,3212.834559  
18,2,2094.767442  
18,2,7492.558511  
18,2,1866.952381  
18,2,2150.088235  
18,2,3269.316327

18,2,4391.240385  
18,2,2278.700000  
18,2,2890.618421  
18,2,2004.617021  
18,2,2288.216216  
18,2,3051.433962  
18,2,1761.920213  
18,2,2688.160377  
18,2,2222.112500  
18,2,2049.880952  
18,2,1501.590000  
18,2,2452.250000  
18,2,3949.777778  
18,2,2074.265625  
18,2,2239.033333  
18,2,18095.294643  
18,2,2429.395833  
18,2,3745.664336  
18,2,1987.083333  
18,2,4410.298913  
18,2,2027.944767  
18,2,1617.047297  
18,2,1913.000000  
18,2,3752.100000  
18,2,1791.380319  
18,2,2967.662791  
18,2,2096.693750  
18,2,1642.877500  
18,2,1877.279412  
18,2,1798.298611  
18,2,1582.257143  
18,2,3809.453947  
18,2,4250.515909  
18,2,2252.168182  
18,2,1668.339623  
18,2,2623.891447  
18,2,1735.711538  
18,2,5025.946809  
18,2,2298.546875  
18,2,8278.762821  
18,2,2148.653846  
18,2,2715.591463  
18,2,1772.500000  
18,2,4249.312500  
18,2,2349.161765  
18,2,2661.706522  
18,2,1642.524390  
18,2,1670.968750  
18,2,3061.359375  
18,2,1717.407407  
18,2,1738.737805  
18,2,2431.627119  
18,2,2199.861111  
18,2,6213.100000  
18,2,2441.383721  
18,2,2133.388889  
18,2,5442.058824  
18,2,2038.097973  
18,2,2186.853659  
18,2,2588.011905  
18,2,5582.432432  
18,2,6080.551136  
18,2,3529.845588  
18,2,2595.455000  
18,2,1556.214286  
18,2,2476.651584

18,2,2080.259615  
18,2,2755.750000  
18,2,1525.692308  
18,2,1985.812500  
18,2,13836.100000  
18,2,3866.393617  
18,2,1801.091912  
18,2,4974.509615  
18,2,1505.847222  
18,2,1678.423077  
18,2,1566.878125  
18,2,2406.375887  
18,2,4825.147727  
18,2,1525.009434  
18,2,2056.587500  
18,2,2614.566489  
18,2,1669.479167  
18,2,1730.081395  
18,2,3787.076923  
18,2,10923.197674  
18,2,4654.921875  
18,2,8829.169444  
18,2,6000.103659  
18,2,1977.779412  
18,2,1518.284091  
18,2,2031.150000  
18,2,4618.670139  
18,2,2772.950521  
18,2,1604.000000  
18,2,2203.156863  
18,2,2069.913043  
18,2,1583.511111  
18,2,1965.026316  
18,2,1616.607143  
18,2,2130.322674  
18,2,2548.965517  
18,2,2491.513514  
18,2,2238.744681  
18,2,1919.048780  
18,2,1916.815789  
18,2,1851.387500  
18,2,1850.100000  
18,2,2683.424479  
18,2,1526.600000  
18,2,1573.219072  
18,2,3202.000000  
18,2,2546.706633  
18,2,1546.042553  
18,2,4483.934659  
18,2,1598.696078  
18,2,10724.695122  
18,2,1536.250000  
18,2,2639.516129  
18,2,3281.108696  
18,2,11963.951087  
18,2,2361.042500  
18,2,1805.690909  
18,2,7740.923780  
18,2,1506.437500  
18,2,2094.063776  
18,2,3611.265625  
18,2,2457.021739  
18,2,6493.707386  
18,2,1746.937500  
18,2,2071.106061  
18,2,1762.770000

18,2,3004.730769  
18,2,4667.222222  
18,2,10024.233696  
18,2,2001.142857  
18,2,2094.171875  
18,2,1705.854651  
18,2,3052.954327  
18,2,3490.641509  
18,2,1536.403061  
18,2,10742.923913  
18,2,2002.708333  
18,2,2206.800000  
18,2,1847.695312  
18,2,2248.764205  
18,2,2426.370833  
18,2,3403.365132  
18,2,8982.367925  
18,2,2622.925926  
18,2,1978.424528  
18,2,1518.809896  
18,2,2580.176829  
18,2,1914.265625  
18,2,3569.361607  
18,2,2359.495000  
18,2,9839.287500  
18,2,1588.463889  
18,2,1788.977500  
18,2,1582.776596  
18,2,2013.551136  
18,2,2552.119318  
18,2,2530.463415  
18,2,3639.799107  
18,2,2187.641509  
18,2,3540.828125  
18,2,2194.204082  
18,2,2436.739130  
18,2,2352.220588  
18,2,3300.800532  
18,2,2051.907895  
18,2,13832.327778  
18,2,2114.312500  
18,2,2034.959184  
18,2,2060.519231  
18,2,1573.475000  
18,2,2028.534722  
18,2,1751.425000  
18,2,9804.508152  
18,2,2051.205189  
18,2,10299.089844  
18,2,2572.666667  
18,2,3973.475877  
18,2,3949.009868  
18,2,1955.207547  
18,2,1677.198529  
18,2,1844.530612  
18,2,3649.700000  
18,2,2046.180000  
18,2,1746.197368  
18,2,1566.853659  
18,2,1656.440758  
18,2,2251.331081  
18,2,2405.415094  
18,2,2269.500000  
18,2,2039.343750  
18,2,3143.606481  
18,2,2287.803571

18,2,1901.744318  
18,2,3812.529412  
18,2,1718.591518  
18,2,1794.414634  
18,2,1648.046875  
18,2,2135.803922  
18,2,1850.792453  
18,2,3655.538462  
18,2,2103.385000  
18,2,1762.500000  
18,2,2713.926829  
18,2,4590.699324  
18,2,1534.862500  
18,2,9103.372727  
18,2,1924.714286  
18,2,1771.697674  
18,2,2078.975000  
18,2,3831.025862  
18,2,2531.525000  
18,2,6203.651596  
18,2,1771.017045  
18,2,1884.423077  
18,2,3191.208333  
18,2,4540.596491  
18,2,2569.653509  
18,2,1909.473684  
18,2,3329.375000  
18,2,2834.146119  
18,2,1633.829268  
18,2,1892.763158  
18,2,1502.803191  
18,2,2661.110577  
18,2,2508.108491  
18,2,1531.548077  
18,2,1893.589286  
18,2,2244.756944  
18,2,3145.278125  
18,2,1991.250000  
18,2,2421.956522  
18,2,2065.656250  
18,2,5562.094340  
18,2,2873.388889  
18,2,2990.357955  
18,2,3962.097561  
18,2,10801.556250  
18,2,2284.689474  
18,2,3147.326389  
18,2,10229.348214  
18,2,2474.320313  
18,2,4199.655000  
18,2,2397.237143  
18,2,1823.823529  
18,2,1652.422619  
18,2,1819.170391  
18,2,1522.602649  
18,2,3532.441489  
18,2,2444.793605  
18,2,1761.215116  
18,2,2534.891892  
18,2,1546.146341  
18,2,2525.287234  
18,2,14269.226562  
18,2,1908.062500  
18,2,2235.555000  
18,2,1875.037500  
18,2,4333.247642

18,2,1727.818182  
18,2,4324.027778  
18,2,2050.360000  
18,2,1663.576087  
18,2,1923.983333  
18,2,3420.817881  
18,2,1606.891892  
18,2,2096.897727  
18,2,1509.695312  
18,2,2230.084906  
18,2,9009.826220  
18,2,2218.396739  
18,2,4579.000000  
18,2,4580.548913  
18,2,3730.496711  
18,2,2037.933511  
18,2,1697.320175  
18,2,2317.187783  
18,2,2645.937500  
18,2,1798.787500  
18,2,1568.996622  
18,2,1569.348837  
18,2,5722.797297  
18,2,1729.064655  
18,2,1606.904255  
18,2,2613.263158  
18,2,1788.855114  
18,2,2194.189516  
18,2,1654.527778  
18,2,1769.372093  
18,2,2131.336735  
18,2,1937.043605  
18,2,2434.514151  
18,2,3140.140306  
18,2,3301.152778  
18,2,1913.566667  
18,2,1595.677632  
18,2,1992.343750  
18,2,2885.375000  
18,2,2020.088889  
18,2,1517.000000  
18,2,2222.468750  
18,2,2023.297297  
18,2,1771.913690  
18,2,1996.774457  
18,2,2574.769231  
18,2,1626.395349  
18,2,3890.223684  
18,2,3961.875000  
18,2,10584.133333  
18,2,10665.511719  
18,2,1940.729167  
18,2,3373.826923  
18,2,6663.627551  
18,2,3426.032738  
18,2,3290.465116  
18,2,2175.968085  
18,2,1596.170213  
18,2,1982.127451  
18,2,3123.955645  
18,2,2435.645000  
18,2,1502.239583  
18,2,1706.761628  
18,2,1917.357143  
18,2,1885.101190  
18,2,2621.527778

18,2,1991.250000  
18,2,1915.329787  
18,2,3606.138889  
18,2,2072.018519  
18,2,1982.932432  
18,2,3481.177083  
18,2,3352.636905  
18,2,1541.348214  
18,2,1673.625000  
18,2,2505.005682  
18,2,1885.200000  
18,2,1603.104167  
18,2,2014.845745  
18,2,3098.681818  
18,2,5920.122449  
18,2,1736.723684  
18,2,1852.635870  
18,2,1502.666667  
18,2,1849.349432  
18,2,2405.906977  
18,2,2648.047500  
18,2,1662.276596  
18,2,2083.781250  
18,2,2986.986413  
18,2,2515.403846  
18,2,9530.405488  
18,2,4714.794643  
18,2,11914.083333  
18,2,1778.000000  
18,2,1765.070652  
18,2,5753.172131  
18,2,1587.461111  
18,2,2022.416667  
18,2,1701.677083  
18,2,2424.720930  
18,2,2600.310976  
18,2,4008.203571  
18,2,1599.762500  
18,2,3829.221675  
18,2,2326.968750  
18,2,2299.600000  
18,2,2132.039634  
18,2,2056.669355  
18,2,1597.204082  
18,2,1865.453947  
18,2,1663.562500  
18,2,5221.201923  
18,2,1541.039474  
18,2,1584.016393  
18,2,1657.482955  
18,2,3118.629808  
18,2,2263.750000  
18,2,1697.051429  
18,2,1724.326816  
18,2,1937.796875  
18,2,1579.358108  
18,2,5714.155556  
18,2,1705.208333  
18,2,4571.388298  
18,2,3151.193396  
18,2,1512.180851  
18,2,1827.925926  
18,2,2937.812500  
18,2,1629.679167  
18,2,1585.317073  
18,2,4023.337838

18,2,2117.772727  
18,2,2198.886905  
18,2,2656.409091  
18,2,3513.190476  
18,2,1768.000000  
18,2,6067.574324  
18,2,3271.627976  
18,2,1770.753906  
18,2,3720.989583  
18,2,6225.000000  
18,2,3299.757576  
18,2,2971.583333  
18,2,1848.380435  
18,2,1775.879902  
18,2,1566.926829  
18,2,1742.281250  
18,2,2613.801136  
18,2,2465.309896  
18,2,1713.002273  
18,2,5077.372093  
18,2,2057.947368  
18,2,1531.062500  
18,2,1499.695946  
18,2,1635.166667  
18,2,1559.765000  
18,2,1571.406250  
18,2,1802.400568  
18,2,1593.683333  
18,2,3937.250000  
18,2,1645.027174  
18,2,1567.354167  
18,2,2084.169355  
18,2,7569.512195  
18,2,2561.413462  
18,2,2383.202128  
18,2,7027.726562  
18,2,3955.055233  
18,2,1983.400000  
18,2,1606.196429  
18,2,2542.689189  
18,2,1851.719388  
18,2,1561.101190  
18,2,1673.045455  
18,2,1646.338235  
18,2,4514.458333  
18,2,2230.650510  
18,2,1758.420732  
18,2,1827.875000  
18,2,1925.348039  
18,2,1737.967593  
18,2,1775.893868  
18,2,1803.454545  
18,2,5009.115741  
18,2,1939.669271  
18,2,2022.663462  
18,2,4203.044444  
18,2,2249.405405  
18,2,1646.566667  
18,2,1802.362069  
18,2,2783.058824  
18,2,4295.274419  
18,2,2411.987500  
18,2,1730.933673  
18,2,1604.725000  
18,2,2092.759091  
18,2,1558.458333

18,2,3292.620000  
18,2,2192.637500  
18,2,1609.528302  
18,2,1787.375000  
18,2,3000.073718  
18,2,2039.363372  
18,2,2150.951923  
18,2,2579.852941  
18,2,1634.104167  
18,2,1789.986111  
18,2,2030.523936  
18,2,1604.257353  
18,2,1656.914894  
18,2,2402.879630  
18,2,1564.450472  
18,2,1537.377841  
18,2,10563.243750  
18,2,1855.730769  
18,2,1828.492424  
18,2,18353.824519  
18,2,2430.669872  
18,2,1540.443452  
18,2,2344.054688  
18,2,2243.741206  
18,2,1552.910714  
18,2,4974.368421  
18,2,1534.562500  
18,2,1794.864796  
18,2,2714.875000  
18,2,1700.746951  
18,2,1857.500000  
18,2,2241.125000  
18,2,3455.787500  
18,2,2467.287037  
18,2,1663.375000  
18,2,1528.684091  
18,2,1907.474490  
18,2,1620.880435  
18,2,2228.615854  
18,2,1885.418605  
18,2,7729.959459  
18,2,3161.243750  
18,2,2385.095395  
18,2,3242.793750  
18,2,9189.163194  
18,2,3409.125000  
18,2,3254.293478  
18,2,1540.295455  
18,2,1749.632653  
18,2,2217.607143  
18,2,5804.609375  
18,2,1798.411765  
18,2,1894.434375  
18,2,1828.387195  
18,2,1723.086207  
18,2,1938.971698  
18,2,1594.453488  
18,2,3959.547619  
18,2,1815.316176  
18,2,1520.156977  
18,2,2023.394231  
18,2,1594.867188  
18,2,2720.005102  
18,2,1710.385714  
18,2,2461.087264  
18,2,4241.707317

18,2,1516.407895  
18,2,2263.476744  
18,2,3013.635417  
18,2,3742.431250  
18,2,2694.009615  
18,2,2294.526316  
18,2,2278.277027  
18,2,2624.625000  
18,2,1613.478365  
18,2,9942.428571  
18,2,3773.007813  
18,2,6333.261905  
18,2,1801.092105  
18,2,2039.782609  
18,2,3982.824074  
18,2,1502.250000  
18,2,1879.883721  
18,2,1826.091463  
18,2,3564.710227  
18,2,1962.863636  
18,2,2094.768293  
18,2,1658.150000  
18,2,1499.151961  
18,2,14848.125000  
18,2,4520.919643  
18,2,3944.487500  
18,2,6575.697368  
18,2,1563.192073  
18,2,1637.208333  
18,2,2166.691489  
18,2,2849.084746  
18,2,5263.332237  
18,2,1825.250000  
18,2,2952.390625  
18,2,2364.617647  
18,2,2439.557692  
18,2,2352.866667  
18,2,7057.101449  
18,2,1792.312500  
18,2,1888.630208  
18,2,2496.278409  
18,2,1721.853723  
18,2,2069.395000  
18,2,2047.187500  
18,2,9046.950820  
18,2,1594.197674  
18,2,1687.489362  
18,2,1865.320652  
18,2,4221.223214  
18,2,2870.430000  
18,2,1552.182927  
18,2,4653.000000  
18,2,2189.375000  
18,2,2429.635000  
18,2,1980.895349  
18,2,3889.250000  
18,2,3214.228261  
18,2,2308.679878  
18,2,2646.365854  
18,2,2909.693878  
18,2,3722.375000  
18,2,1973.270349  
18,2,1761.526316  
18,2,2849.457317  
18,2,2250.263636  
18,2,4227.468085

18,2,2448.736842  
18,2,1564.953488  
18,2,3600.900000  
18,2,4543.287234  
18,2,1542.725000  
18,2,1552.406250  
18,2,1830.709302  
18,2,3073.798077  
18,2,2645.348039  
18,2,1827.415094  
18,2,3362.937500  
18,2,4175.272727  
18,2,1726.893750  
18,2,2283.244318  
18,2,1660.033854  
18,2,1838.208333  
18,2,3384.625000  
18,2,2103.308511  
18,2,1747.562500  
18,2,4887.961538  
18,2,3037.392857  
18,2,1587.308219  
18,2,1961.286585  
18,2,2060.320652  
18,2,1873.089623  
18,2,1655.347826  
18,2,1962.725806  
18,2,2401.313253  
18,2,1834.328125  
18,2,1530.697581  
18,2,2164.872340  
18,2,2392.600000  
18,2,2814.666667  
18,2,5557.585106  
18,2,3448.080508  
18,2,1590.335000  
18,2,1537.462264  
18,2,1562.822581  
18,2,1971.121795  
18,2,2262.654255  
18,2,1511.093023  
18,2,1639.153061  
18,2,2069.765625  
18,2,1697.576923  
18,2,2171.223404  
18,2,1600.844444  
18,2,3160.325342  
18,2,2415.390244  
18,2,4462.233696  
18,2,2195.273148  
18,2,3107.148148  
18,2,4253.046512  
18,2,1840.346939  
18,2,2290.085106  
18,2,3488.500000  
18,2,2792.049107  
18,2,2704.872283  
18,2,1880.362745  
18,2,1922.826087  
18,2,2763.795673  
18,2,2237.742188  
18,2,1919.993590  
18,2,1734.442708  
18,2,2521.120192  
18,2,1504.494186  
18,2,2015.147222

18,2,3249.683333  
18,2,1602.725490  
18,2,1578.250000  
18,2,1582.666667  
18,2,2005.945122  
18,2,1886.837500  
18,2,1977.042553  
18,2,3014.192308  
18,2,1677.000000  
18,2,3124.159574  
18,2,2116.087838  
18,2,3996.875000  
18,2,2166.794872  
18,2,2447.671429  
18,2,3157.732143  
18,2,1665.147059  
18,2,3106.219512  
18,2,2548.715517  
18,2,2191.592500  
18,2,1501.337838  
18,2,1599.294118  
18,2,3418.928571  
18,2,2330.095833  
18,2,2650.723404  
18,2,1654.724432  
18,2,8810.229730  
18,2,1995.554687  
18,2,3453.302778  
18,2,3048.572917  
18,2,4481.566176  
18,2,2799.521341  
18,2,2226.250000  
18,2,2639.234043  
18,2,6110.313725  
18,2,4639.065789  
18,2,2025.491071  
18,2,1734.021429  
18,2,1672.883721  
18,2,1568.500000  
18,2,1542.002778  
18,2,1846.445000  
18,2,2013.222222  
18,2,4067.220833  
18,2,1571.163793  
18,2,1832.282895  
18,2,3072.750000  
18,2,1548.487069  
18,2,1915.866667  
18,2,1947.050000  
18,2,2228.258152  
18,2,3851.970588  
18,2,4241.250000  
18,2,1877.424528  
18,2,1568.000000  
18,2,2095.720588  
18,2,1619.928571  
18,2,1670.885000  
18,2,2693.565217  
18,2,2438.883721  
18,2,2166.360465  
18,2,3858.484375  
18,2,1759.042857  
18,2,2091.800000  
18,2,6363.332386  
18,2,1771.173469  
18,2,2222.809524

18,2,3227.116477  
18,2,3535.574074  
18,2,1707.819149  
18,2,1955.547619  
18,2,2391.750000  
18,2,1560.934783  
18,2,1961.607143  
18,2,1502.770408  
18,2,2065.397436  
18,2,1522.104651  
18,2,1649.359043  
18,2,2052.577778  
18,2,2459.669811  
18,2,1869.605556  
18,2,2880.002358  
18,2,5094.375000  
18,2,1505.256410  
18,2,1576.769737  
18,2,1725.584906  
18,2,2609.718750  
18,2,1861.848214  
18,2,1536.186047  
18,2,3863.500000  
18,2,2029.032609  
18,2,1961.987179  
18,2,11008.000000  
18,2,1597.869565  
18,2,1503.830000  
18,2,2907.305233  
18,2,2646.083333  
18,2,1692.571429  
18,2,2118.022727  
18,2,1502.000000  
18,2,2436.233696  
18,2,1757.937500  
18,2,2413.281250  
18,2,1612.895833  
18,2,3069.460526  
18,2,1597.076923  
18,2,2750.606132  
18,2,2409.107843  
18,2,1700.210000  
18,2,2025.358974  
18,2,1637.763889  
18,2,1800.680921  
18,2,2217.236364  
18,2,3531.161184  
18,2,1912.077778  
18,2,2128.164894  
18,2,2184.108974  
18,2,3853.100000  
18,2,4179.053435  
18,2,1856.864583  
18,2,1848.477941  
18,2,2068.369318  
18,2,1552.728261  
18,2,1909.737288  
18,2,2937.481818  
18,2,2888.552083  
18,2,1690.843137  
18,2,2460.390625  
18,2,1550.724359  
18,2,3100.084906  
18,2,1584.500000  
18,2,1885.600000  
18,2,1505.313725

18,2,1672.500000  
18,2,1954.402439  
18,2,9015.073980  
18,2,2732.953947  
18,2,1942.250000  
18,2,2273.412037  
18,2,2752.063830  
18,2,1535.426829  
18,2,2810.768939  
18,2,1501.787879  
18,2,1538.957589  
18,2,2102.188889  
18,2,2163.617647  
18,2,2053.331522  
18,2,1547.494048  
18,2,2681.973684  
18,2,3472.756098  
18,2,2081.872549  
18,2,1642.701087  
18,2,1722.056818  
18,2,1665.392045  
18,2,2270.177778  
18,2,2112.666667  
18,2,1722.468085  
18,2,1559.403226  
18,2,1500.119681  
18,2,3953.596939  
18,2,1883.577128  
18,2,1709.358974  
18,2,2218.719298  
18,2,1619.622549  
18,2,2376.798942  
18,2,4001.914286  
18,2,1671.538462  
18,2,2658.015625  
18,2,3414.223558  
18,2,1526.110119  
18,2,1700.013889  
18,2,2304.343085  
18,2,1858.155000  
18,2,1505.405405  
18,2,3200.438710  
18,2,1867.559783  
18,2,2190.177778  
18,2,1867.083333  
18,2,3809.500000  
18,2,2485.438424  
18,2,2071.339623  
18,2,1804.483108  
18,2,2880.351064  
18,2,2546.821429  
18,2,1942.977041  
18,2,5618.741848  
18,2,1718.625000  
18,2,2285.440217  
18,2,1841.500000  
18,2,2382.273810  
18,2,11694.731618  
18,2,2258.715909  
18,2,1593.027027  
18,2,3808.435714  
18,2,2720.534091  
18,2,3387.675000  
18,2,2353.482143  
18,2,5712.000000  
18,2,4177.022727

18,2,2266.107143  
18,2,3037.796875  
18,2,2540.854167  
18,2,1991.804878  
18,2,1689.078125  
18,2,19475.921053  
18,2,1575.493056  
18,2,2000.375000  
18,2,1539.689286  
18,2,3609.344262  
18,2,1675.084184  
18,2,2025.369565  
18,2,1675.000000  
18,2,2243.722222  
18,2,1753.388021  
18,2,2812.457447  
18,2,1505.250000  
18,2,1692.507576  
18,2,5681.997024  
18,2,2961.969388  
18,2,2035.802326  
18,2,2193.522222  
18,2,2392.482955  
18,2,1639.515306  
18,2,2323.470588  
18,2,2650.778017  
18,2,2601.127660  
18,2,4429.375000  
18,2,2117.293103  
18,2,1918.267857  
18,2,2624.819149  
18,2,1780.301829  
18,2,1642.607143  
18,2,1989.566176  
18,2,3083.729167  
18,2,2020.000000  
18,2,2738.955556  
18,2,3337.916107  
18,2,12045.875000  
18,2,2136.397059  
18,2,1726.894608  
18,2,1765.390625  
18,2,1760.243243  
18,2,2317.409091  
18,2,2761.800000  
18,2,2290.400000  
18,2,2146.419118  
18,2,2431.435897  
18,2,5957.378049  
18,2,2250.875000  
18,2,3082.538265  
18,2,1999.650000  
18,2,1928.250000  
18,2,1816.281977  
18,2,3266.025000  
18,2,3979.531250  
18,2,1885.082237  
18,2,3320.575581  
18,2,1605.250000  
18,2,2142.716216  
18,2,3588.276042  
18,2,11112.181818  
18,2,1626.644737  
18,2,6857.349490  
18,2,2869.571429  
18,2,2387.750000

18,2,1871.798913  
18,2,1838.593750  
18,2,2065.916667  
18,2,1575.948718  
18,2,4525.905172  
18,2,1547.044811  
18,2,2156.141304  
18,2,10758.668478  
18,2,1571.875000  
18,2,1628.421875  
18,2,7171.675000  
18,2,2855.666667  
18,2,1579.073529  
18,2,3992.562500  
18,2,1825.404070  
18,2,1634.397727  
18,2,4291.522727  
18,2,2544.904891  
18,2,3268.710526  
18,2,2225.836538  
18,2,4878.232143  
18,2,2487.526163  
18,2,9401.016667  
18,2,5308.880952  
18,2,1671.767442  
18,2,1909.088889  
18,2,2232.558140  
18,2,5660.961538  
18,2,3344.691406  
18,2,2795.234694  
18,2,1500.515625  
18,2,1527.431034  
18,2,1550.095238  
18,2,1988.785714  
18,2,1756.908537  
18,2,3786.162162  
18,2,2121.194444  
18,2,1765.616279  
18,2,2021.520833  
18,2,2521.095588  
18,2,2632.150000  
18,2,2049.210106  
18,2,2165.863095  
18,2,2164.152174  
18,2,2381.854651  
18,2,1772.260870  
18,2,3764.996324  
18,2,7151.984375  
18,2,3533.532258  
18,2,3991.725000  
18,2,2060.357843  
18,2,3353.679245  
18,2,1653.397727  
18,2,1706.300000  
18,2,2299.650000  
18,2,1999.918605  
18,2,2561.700000  
18,2,3079.832237  
18,2,1598.878049  
18,2,6233.750000  
18,2,3098.347222  
18,2,1502.412736  
18,2,1506.090909  
19,1,5524.115625  
19,1,5908.378049  
19,1,2779.481618

19,1,17329.475000  
19,1,3479.330000  
19,1,3927.717949  
19,1,8216.164474  
19,1,4105.821429  
19,1,2232.497340  
19,1,1620.500000  
19,1,2903.920455  
19,1,14642.744186  
19,1,2888.471154  
19,1,1899.173913  
19,1,11817.340426  
19,1,7190.314516  
19,1,6197.681818  
19,1,5351.450000  
19,1,1902.916667  
19,1,1502.104167  
19,1,2946.595930  
19,1,8140.125000  
19,1,7951.746622  
19,1,1744.863281  
19,1,3251.400000  
19,1,6173.940217  
19,1,2889.395833  
19,1,1892.992188  
19,1,2075.525000  
19,1,1701.458333  
19,1,1522.744318  
19,1,1541.208333  
19,1,12062.858333  
19,1,3974.841912  
19,1,11950.994048  
19,1,3852.440789  
19,1,4081.270270  
19,1,1742.091216  
19,1,12596.600000  
19,1,8299.666667  
19,1,1534.983333  
19,1,2557.188679  
19,1,2338.744186  
19,1,10015.600000  
19,1,2605.460938  
19,1,2876.010870  
19,1,12476.181818  
19,1,3512.475000  
19,1,1787.931298  
19,1,5919.062500  
19,1,9052.437500  
19,1,4848.275000  
19,1,6443.418919  
19,1,2470.222973  
19,1,2901.281977  
19,1,3260.926829  
19,1,2845.153846  
19,1,3980.234043  
19,1,5673.000000  
19,1,5001.781250  
19,1,8571.812500  
19,1,5335.904167  
19,1,1994.122283  
19,1,5089.333333  
19,1,16015.430851  
19,1,4080.975610  
19,1,2551.986486  
19,1,3522.375000  
19,1,3723.763158

19,1,4640.750000  
19,1,5457.583333  
19,1,1541.676471  
19,1,2061.953947  
19,1,17087.803571  
19,1,5798.738889  
19,1,16371.662162  
19,1,10647.208333  
19,1,2704.047619  
19,1,2140.750000  
19,1,2308.439024  
19,1,3523.130319  
19,1,6001.456395  
19,1,1656.472561  
19,1,2141.877717  
19,1,7111.302632  
19,1,7452.693182  
19,1,5131.560976  
19,1,8908.678571  
19,1,2993.034884  
19,1,2315.375000  
19,1,17841.409722  
19,1,6203.972973  
19,1,5679.550000  
19,1,1712.016304  
19,1,4622.761905  
19,1,12593.500000  
19,1,1594.080000  
19,1,1881.750000  
19,1,2384.310976  
19,1,4325.648936  
19,1,4744.115385  
19,1,2036.046296  
19,1,2593.789894  
19,1,4455.547619  
19,1,2700.425532  
19,1,6704.812500  
19,1,1531.555556  
19,1,1709.615385  
19,1,1593.995690  
19,1,3469.937500  
19,1,2047.500000  
19,1,2049.451613  
19,1,2870.856061  
19,1,4369.750000  
19,1,3855.400735  
19,1,1555.023256  
19,1,1635.961111  
19,1,4391.194079  
19,1,1639.378676  
19,1,7097.875000  
19,1,2952.816667  
19,1,2838.760870  
19,1,2145.130952  
19,1,2540.839844  
19,1,1897.090909  
19,1,2713.971429  
19,1,1577.076220  
19,1,4085.195946  
19,1,4136.318182  
19,1,7391.145349  
19,1,11242.040441  
19,1,1581.187500  
19,1,5225.500000  
19,1,1751.326220  
19,1,1565.704545

19,1,1710.390244  
19,1,4904.093750  
19,1,3443.500000  
19,1,2497.423077  
19,1,2125.704787  
19,1,4667.234043  
19,1,5306.157895  
19,1,2261.097561  
19,1,2513.157895  
19,1,1719.515625  
19,1,14335.392857  
19,1,7864.403846  
19,1,2330.580882  
19,1,3379.166667  
19,1,7543.750000  
19,1,7320.869681  
19,1,3101.605114  
19,1,2190.333333  
19,1,9925.964674  
19,1,14748.060714  
19,1,9201.925676  
19,1,1770.525000  
19,1,5477.518293  
19,1,1537.564286  
19,1,1708.437500  
19,1,6146.393382  
19,1,8563.687500  
19,1,6545.622024  
19,1,2112.383333  
19,1,1627.576923  
19,1,2272.681548  
19,1,9601.945652  
19,1,4317.253472  
19,1,1607.219512  
19,1,1951.400000  
19,1,5320.197674  
19,1,7066.733333  
19,1,3917.640625  
19,1,1730.598214  
19,1,6356.430000  
19,1,3389.740566  
19,1,1542.053030  
19,1,1771.512195  
19,1,2022.515625  
19,1,3478.982143  
19,1,14841.993243  
19,1,2440.920732  
19,1,3769.055000  
19,1,2593.343750  
19,1,2398.615385  
19,1,1839.921512  
19,1,4664.916667  
19,1,3269.171512  
19,1,5026.020833  
19,1,2286.537879  
19,1,4128.083333  
19,1,1589.230769  
19,1,2765.236842  
19,1,1529.266892  
19,1,2553.868590  
19,1,4855.000000  
19,1,2383.632143  
19,1,4987.162162  
19,1,6202.630952  
19,1,7304.172619  
19,1,5876.775000

19,1,1792.791667  
19,1,1723.392857  
19,1,6870.884615  
19,1,7683.709302  
19,1,3458.310000  
19,1,11506.685185  
19,1,6082.143519  
19,1,14350.221154  
19,1,15952.826923  
19,1,4971.115385  
19,1,2856.586806  
19,1,19067.538462  
19,1,16206.296875  
19,1,3113.115854  
19,1,2711.555556  
19,1,2482.834677  
19,1,7039.487179  
19,1,2687.681250  
19,1,1737.775000  
19,1,3230.000000  
19,1,7858.954545  
19,1,3230.071429  
19,1,2215.478659  
19,1,2675.050000  
19,1,5487.725000  
19,1,2307.059211  
19,1,3462.700658  
19,1,4600.519231  
19,1,3634.475000  
19,1,4431.936170  
19,1,1983.076923  
19,1,1854.060897  
19,1,1971.152174  
19,1,1900.061224  
19,1,5626.750000  
19,1,5061.391447  
19,1,2976.280405  
19,1,12433.990132  
19,1,2071.500000  
19,1,7627.343023  
19,1,8843.585227  
19,1,1876.779412  
19,1,3631.447368  
19,1,2945.051020  
19,1,1866.977041  
19,1,3630.255102  
19,1,15293.287791  
19,1,1741.620968  
19,1,1845.208333  
19,1,1945.500000  
19,1,2281.885714  
19,1,1607.987500  
19,1,1777.964286  
19,1,11576.832386  
19,1,3498.625000  
19,1,14319.846154  
19,1,2067.884615  
19,1,8259.293860  
19,1,2409.677326  
19,1,3643.832500  
19,1,6723.031250  
19,1,2869.880556  
19,1,7678.166667  
19,1,5791.454545  
19,1,17070.206522  
19,1,2049.062500

19,1,2871.223404  
19,1,2338.163462  
19,1,2148.395349  
19,1,16988.033088  
19,1,2483.725000  
19,1,3832.900568  
19,1,5256.849138  
19,1,4186.689189  
19,1,2922.645833  
19,1,4836.333333  
19,1,3002.684211  
19,1,3224.634615  
19,1,15336.274306  
19,1,4976.622222  
19,1,2357.812500  
19,1,6406.483333  
19,1,2484.629630  
19,1,5839.005682  
19,1,2125.303571  
19,1,1668.615385  
19,1,15695.418919  
19,1,2203.818182  
19,1,15753.993750  
19,1,15718.572674  
19,1,2941.863636  
19,1,5342.206522  
19,1,1556.555556  
19,1,3042.996429  
19,1,8155.366279  
19,1,2120.716216  
19,1,1515.833333  
19,1,7124.195313  
19,1,4976.181818  
19,1,3564.661290  
19,1,10923.767857  
19,1,8343.250000  
19,1,1634.609756  
19,1,1656.416667  
19,1,3355.878049  
19,1,2231.421875  
19,1,1958.405556  
19,1,1624.264286  
19,1,4896.000000  
19,1,2971.268293  
19,1,2041.872093  
19,1,2319.947368  
19,1,9121.404255  
19,1,1615.196429  
19,1,2984.984043  
19,1,8468.829268  
19,1,9087.416667  
19,1,1747.630556  
19,1,2212.816667  
19,1,1978.921053  
19,1,1554.246951  
19,1,14455.820122  
19,1,3190.094512  
19,1,1788.000000  
19,1,2334.960106  
19,1,1654.734694  
19,1,2067.439394  
19,1,2449.534483  
19,1,4673.164773  
19,1,2267.250000  
19,1,1735.125000  
19,1,9966.464286

19,1,6441.309783  
19,1,2336.333333  
19,1,3756.500000  
19,1,4458.740385  
19,1,1845.625000  
19,1,4530.522222  
19,1,4195.079167  
19,1,17112.835227  
19,1,1518.705882  
19,1,2462.125000  
19,1,4397.000000  
19,1,5828.579861  
19,1,7112.125000  
19,1,3420.847973  
19,1,14125.253571  
19,1,2764.356771  
19,1,1538.930851  
19,1,4015.775000  
19,1,1711.618421  
19,1,12938.000000  
19,1,4179.658163  
19,1,4686.195946  
19,1,6703.911111  
19,1,4493.455128  
19,1,5306.179487  
19,1,3777.587766  
19,1,7126.007812  
19,1,4061.511628  
19,1,12784.313953  
19,1,1996.862500  
19,1,12678.888889  
19,1,4678.548611  
19,1,1619.355978  
19,1,15219.919118  
19,1,2907.407500  
19,1,8327.266827  
19,1,3978.714286  
19,1,3272.494681  
19,1,2098.767857  
19,1,3319.193750  
19,1,3237.687500  
19,1,2942.555556  
19,1,4322.893293  
19,1,2085.282609  
19,1,10344.639205  
19,1,3467.900568  
19,1,1724.307692  
19,1,4747.250000  
19,1,5317.200000  
19,1,3852.888889  
19,1,4454.239286  
19,1,18497.038889  
19,1,2458.611111  
19,1,2143.105114  
19,1,10006.329545  
19,1,2741.145161  
19,1,2191.647059  
19,1,6356.265306  
19,1,1811.853659  
19,1,12446.676829  
19,1,12552.230769  
19,1,2129.906250  
19,1,8332.785714  
19,1,2773.218085  
19,1,2692.750000  
19,1,1770.377005

19,1,2164.096154  
19,1,3564.692568  
19,1,4425.867500  
19,1,2482.151961  
19,1,2148.953125  
19,1,4472.337209  
19,1,2342.591912  
19,1,4970.571429  
19,1,5324.136364  
19,1,3406.860000  
19,1,1881.000000  
19,1,2604.762500  
19,1,3654.052083  
19,1,10548.142857  
19,1,1928.723837  
19,1,1617.840909  
19,1,4930.173387  
19,1,2926.941176  
19,1,8694.452128  
19,1,3495.485294  
19,1,4871.343750  
19,1,8611.655172  
19,1,4064.106061  
19,1,2158.545455  
19,1,1782.102041  
19,1,2380.755814  
19,1,3445.062500  
19,1,3274.222222  
19,1,8051.452381  
19,1,1663.258065  
19,1,5095.285714  
19,1,2308.648649  
19,1,2318.568182  
19,1,1707.038265  
19,1,4329.229167  
19,1,1891.268293  
19,1,2675.671875  
19,1,8223.937500  
19,1,3148.217105  
19,1,13324.764706  
19,1,5764.937500  
19,1,5522.500000  
19,1,7176.465116  
19,1,4707.068182  
19,1,1596.000000  
19,1,10707.355556  
19,1,1612.704545  
19,1,1806.441176  
19,1,9691.754464  
19,1,1570.756098  
19,1,9518.601351  
19,1,4486.812500  
19,1,18658.791667  
19,1,2842.674419  
19,1,8543.517857  
19,1,2548.202703  
19,1,3939.418919  
19,1,3665.230769  
19,1,3208.086806  
19,1,2655.952381  
19,1,2268.187500  
19,1,2978.588235  
19,1,1883.072581  
19,1,17096.972222  
19,1,6408.288793  
19,1,1526.648026

19,1,10909.500000  
19,1,2306.009146  
19,1,1868.496324  
19,1,1570.171429  
19,1,2636.675000  
19,1,3175.879808  
19,1,2845.666667  
19,1,6215.448276  
19,1,8262.589286  
19,1,2925.172414  
19,1,2604.432927  
19,1,6303.272727  
19,1,4516.955882  
19,1,9104.893617  
19,1,3867.578125  
19,1,2479.058824  
19,1,1761.583333  
19,1,3468.914894  
19,1,6544.610294  
19,1,4554.000000  
19,1,2058.911765  
19,1,3334.868421  
19,1,1684.159091  
19,1,3971.849138  
19,1,10055.018519  
19,1,2009.905000  
19,1,8093.989865  
19,1,16927.161585  
19,1,1553.000000  
19,1,3613.113636  
19,1,1627.933511  
19,1,3030.937500  
19,1,3551.500000  
19,1,1593.991071  
19,1,8707.531250  
19,1,3249.625000  
19,1,2108.005319  
19,1,2854.298077  
19,1,6265.014205  
19,1,2798.988636  
19,1,2064.638889  
19,1,1506.219697  
19,1,2848.110465  
19,1,1781.925000  
19,1,1921.486413  
19,1,3311.918269  
19,1,1772.055556  
19,1,5329.750000  
19,1,4859.343750  
19,1,3993.393750  
19,1,1710.726562  
19,1,5619.531250  
19,1,2305.883929  
19,1,2220.677305  
19,1,17880.206897  
19,1,4147.976562  
19,1,4020.169811  
19,1,3780.090909  
19,1,1530.600610  
19,1,1950.026042  
19,1,4995.798780  
19,1,4793.936170  
19,1,2888.125000  
19,1,4738.109756  
19,1,1666.676471  
19,1,19525.136905

19,1,4068.738095  
19,1,1669.650000  
19,1,2390.755435  
19,1,5283.601351  
19,1,5649.391026  
19,1,5102.060606  
19,1,1684.892857  
19,1,3164.314024  
19,1,9336.800000  
19,1,3636.727273  
19,1,1645.656250  
19,1,2457.975962  
19,1,2279.617647  
19,1,2390.305556  
19,1,3060.293478  
19,1,1984.817073  
19,1,2597.516667  
19,1,3267.884146  
19,1,10782.937500  
19,1,1920.045732  
19,1,2108.521739  
19,1,6505.250000  
19,1,5259.482143  
19,1,1629.512195  
19,1,3943.000000  
19,1,2703.017857  
19,1,4768.842105  
19,1,3761.811111  
19,1,1764.958333  
19,1,4779.750000  
19,1,5978.346154  
19,1,4295.833333  
19,1,2216.767442  
19,1,16858.662500  
19,1,13133.950000  
19,1,19222.505102  
19,1,5589.692308  
19,1,3798.808824  
19,1,2375.000000  
19,1,2166.422222  
19,1,3448.950658  
19,1,2964.597500  
19,1,4076.020833  
19,1,2867.166667  
19,1,3850.887324  
19,1,1512.172727  
19,1,2868.675000  
19,1,1648.211538  
19,1,11781.761905  
19,1,3705.707317  
19,1,2609.660256  
19,1,1893.104167  
19,1,3556.538043  
19,1,5076.136029  
19,1,1842.487805  
19,1,1844.927632  
19,1,4106.863636  
19,1,1553.586207  
19,1,4484.989583  
19,1,18114.400000  
19,1,2008.941176  
19,1,15622.830357  
19,1,10963.880435  
19,1,5230.500000  
19,1,3808.192935  
19,1,1617.846875

19,1,11935.039773  
19,1,3794.530405  
19,1,2558.363889  
19,1,10820.554348  
19,1,5000.736979  
19,1,3380.940000  
19,1,17658.750000  
19,1,2322.918269  
19,1,3507.826087  
19,1,16701.831731  
19,1,4215.254032  
19,1,2589.397727  
19,1,3483.000000  
19,1,1852.269886  
19,1,2958.681034  
19,1,2337.113636  
19,1,5622.882353  
19,1,1682.777778  
19,1,3384.581633  
19,1,14993.826923  
19,1,2276.477941  
19,1,5624.809524  
19,1,2315.287500  
19,1,2240.845745  
19,1,8199.909091  
19,1,2964.617647  
19,1,1612.200000  
19,1,3493.682927  
19,1,9105.125000  
19,1,3287.668919  
19,1,4780.304348  
19,1,10435.785714  
19,1,7470.486486  
19,1,4980.157895  
19,1,5109.694444  
19,1,7740.043103  
19,1,1504.660714  
19,1,11259.857143  
19,1,2460.000000  
19,1,5367.820000  
19,1,4975.062500  
19,1,1930.328125  
19,1,5053.416667  
19,1,8447.308824  
19,1,1711.302326  
19,1,2655.289773  
19,1,3920.640625  
19,1,3833.745690  
19,1,5498.303977  
19,1,2129.895833  
19,1,8955.594595  
19,1,5455.191489  
19,1,5578.985849  
19,1,2323.194444  
19,1,9669.417683  
19,1,5613.000000  
19,1,4181.040816  
19,1,2089.763889  
19,1,8092.741848  
19,1,1767.134615  
19,1,1885.865854  
19,1,8043.934211  
19,1,6354.436275  
19,1,5531.731707  
19,1,1517.997642  
19,1,2771.000000

19,1,6901.625000  
19,1,4213.520349  
19,1,2248.120192  
19,1,1989.847973  
19,1,2316.000000  
19,1,6329.055851  
19,1,5616.500000  
19,1,3022.570513  
19,1,1885.579787  
19,1,3902.214286  
19,1,3960.458333  
19,1,5125.387195  
19,1,2363.736111  
19,1,1971.111111  
19,1,6951.923077  
19,1,11643.458333  
19,1,6334.993590  
19,1,2538.726351  
19,1,1899.590909  
19,1,6554.733333  
19,1,1718.528846  
19,1,5820.247283  
19,1,2363.325000  
19,1,3352.516667  
19,1,12232.481250  
19,1,3823.028409  
19,1,16250.283333  
19,1,4716.625000  
19,1,1868.552885  
19,1,5323.813830  
19,1,5571.041667  
19,1,5864.093085  
19,1,1734.787234  
19,1,11897.833333  
19,1,1901.125000  
19,1,15155.262500  
19,1,12357.127717  
19,1,15688.541667  
19,1,1546.000000  
19,1,2298.280556  
19,1,12108.295455  
19,1,3927.660377  
19,1,4907.952381  
19,1,8578.888889  
19,1,2756.642500  
19,1,3261.151515  
19,1,3283.619048  
19,1,3581.247596  
19,1,4170.663194  
19,1,11137.524510  
19,1,3509.979592  
19,1,3206.162791  
19,1,6221.234756  
19,1,3161.629032  
19,1,3439.000000  
19,1,5396.208333  
19,1,17652.076923  
19,1,3701.805556  
19,1,2912.991477  
19,1,2189.177778  
19,1,4335.305921  
19,1,7397.692073  
19,1,6229.790441  
19,1,4404.038043  
19,1,4521.854167  
19,1,13027.214286

19,1,1677.261364  
19,1,1949.307292  
19,1,2126.600000  
19,1,1600.714286  
19,1,18027.766129  
19,1,2146.797619  
19,1,2004.453125  
19,1,7710.000000  
19,1,4397.736486  
19,1,2702.454787  
19,1,5307.808824  
19,1,1865.416667  
19,1,1823.721429  
19,1,3401.638889  
19,1,2562.455000  
19,1,7343.875000  
19,1,9477.511111  
19,1,8620.584375  
19,1,5642.238095  
19,1,2485.375000  
19,1,11585.255319  
19,1,1622.000000  
19,1,3651.562500  
19,1,2041.446809  
19,1,3321.600000  
19,1,4142.940476  
19,1,11622.688889  
19,1,19201.923077  
19,1,6099.617424  
19,1,2154.859756  
19,1,7365.034091  
19,1,4651.540541  
19,1,6714.323171  
19,1,2394.707317  
19,1,19126.077381  
19,1,5386.625000  
19,1,1975.547619  
19,1,1815.878205  
19,1,7352.063953  
19,1,8762.942857  
19,1,9232.851190  
19,1,7470.812500  
19,1,7372.941406  
19,1,2259.562500  
19,1,6449.283088  
19,1,1975.182692  
19,1,7299.265625  
19,1,1986.011905  
19,1,4182.617424  
19,1,5428.875000  
19,1,1544.517857  
19,1,2722.392857  
19,1,18788.731707  
19,1,1923.317073  
19,1,4485.218750  
19,1,6333.158088  
19,1,12209.113636  
19,1,1622.955882  
19,1,1887.310606  
19,1,10494.933333  
19,1,5495.568182  
19,1,1539.104167  
19,1,1574.934524  
19,1,1551.285714  
19,1,2918.280488  
19,1,14605.942308

19,1,6616.799020  
19,1,4720.765957  
19,1,2169.317308  
19,1,1775.965909  
19,1,3124.933333  
19,1,8718.922794  
19,1,1949.397059  
19,1,2330.361842  
19,1,3493.340426  
19,1,4390.547794  
19,1,7538.406977  
19,1,1792.000000  
19,1,5160.843750  
19,1,2789.456522  
19,1,2164.428571  
19,1,4377.641827  
19,1,1824.756757  
19,1,3686.727273  
19,1,2030.714286  
19,1,1979.180556  
19,1,1916.767857  
19,1,1691.404255  
19,1,7037.802083  
19,1,3733.910000  
19,1,3411.666667  
19,1,2970.895270  
19,1,3501.640625  
19,1,11993.833333  
19,1,3575.657258  
19,1,4355.170455  
19,1,5568.316667  
19,1,3371.767442  
19,1,2738.192857  
19,1,3576.160714  
19,1,17170.638298  
19,1,7335.833333  
19,1,3453.010050  
19,1,1885.382979  
19,1,2395.940217  
19,1,6799.703125  
19,1,5928.349265  
19,1,2852.184375  
19,1,4144.599265  
19,1,11974.750000  
19,1,1834.860294  
19,1,4908.250000  
19,1,8132.994565  
19,1,5791.850543  
19,1,4493.092949  
19,1,2357.153846  
19,1,12228.186047  
19,1,1961.902174  
19,1,11007.617500  
19,1,2793.678571  
19,1,7782.125000  
19,1,5548.398810  
19,1,1872.646341  
19,1,1723.523256  
19,1,5798.442308  
19,1,4928.628906  
19,1,3001.166667  
19,1,4451.870192  
19,1,2778.812500  
19,1,1631.855263  
19,1,5730.000000  
19,1,1768.000000

19,1,8891.732558  
19,1,2677.232143  
19,1,6300.455128  
19,1,3433.758721  
19,1,2111.475000  
19,1,10963.243902  
19,1,2139.679878  
19,1,11706.567308  
19,1,9545.142857  
19,1,7615.625000  
19,1,4052.918919  
19,1,3126.443750  
19,1,16347.125000  
19,1,8581.039894  
19,1,2102.023256  
19,1,8312.339844  
19,1,6096.601744  
19,1,13259.233696  
19,1,6557.143382  
19,1,3939.824219  
19,1,2450.000000  
19,1,4610.657895  
19,1,3972.777344  
19,1,1730.390625  
19,1,17665.809783  
19,1,2592.375000  
19,1,9057.830729  
19,1,1846.115385  
19,1,3311.545455  
19,1,3040.014706  
19,1,1502.381579  
19,1,5759.639706  
19,1,4441.250000  
19,1,4717.920732  
19,1,1970.482143  
19,1,14108.158537  
19,1,4001.535714  
19,1,8275.593023  
19,1,4655.950000  
19,1,2180.000000  
19,1,2438.184524  
19,1,6790.844595  
19,1,2659.815476  
19,1,7009.926136  
19,1,2354.320312  
19,1,1547.891892  
19,1,1877.823171  
19,1,6455.391129  
19,1,3088.142857  
19,1,2333.954082  
19,1,4459.883333  
19,1,4142.990854  
19,1,8545.244318  
19,1,2496.480769  
19,1,4487.877500  
19,1,2260.659574  
19,1,1691.335938  
19,1,1910.575758  
19,1,6451.379310  
19,1,5744.625000  
19,1,2005.576687  
19,1,1676.674479  
19,1,8584.775000  
19,1,1875.871795  
19,1,4939.381757  
19,1,4261.313776

19,1,1849.000000  
19,1,3149.909091  
19,1,8559.892045  
19,1,5785.716981  
19,1,4636.728723  
19,1,1579.697674  
19,1,6910.558673  
19,1,5402.204545  
19,1,10219.713235  
19,1,9257.843750  
19,1,6934.256098  
19,1,2329.264535  
19,1,2396.176471  
19,1,2731.776786  
19,1,5112.090000  
19,1,6225.392857  
19,1,4184.700000  
19,1,12732.830645  
19,1,1594.062500  
19,1,12896.000000  
19,1,3705.913043  
19,1,13127.067308  
19,1,2216.336538  
19,1,2057.777778  
19,1,2511.555556  
19,1,2356.928571  
19,1,5198.070652  
19,1,12854.326531  
19,1,1660.240625  
19,1,2618.281863  
19,1,2849.309783  
19,1,1886.543367  
19,1,3756.692857  
19,1,5581.464844  
19,1,1604.869565  
19,1,3937.200000  
19,1,4507.659091  
19,1,2114.939516  
19,1,7710.146739  
19,1,18260.880000  
19,1,1930.815789  
19,1,2641.440476  
19,1,1618.214286  
19,1,3164.128125  
19,1,3123.140957  
19,1,6019.364362  
19,1,7705.527778  
19,1,2335.492857  
19,1,5035.875000  
19,1,1600.934211  
19,1,1894.648437  
19,1,2172.265625  
19,1,4051.097826  
19,1,2664.097500  
19,1,11277.013158  
19,1,7696.906250  
19,1,7632.088235  
19,1,2453.355000  
19,1,16591.527174  
19,1,2158.714286  
19,1,3339.187500  
19,1,1795.341667  
19,1,2645.242424  
19,1,3766.375000  
19,1,6290.267241  
19,1,1531.578125

19,1,3196.988636  
19,1,2193.886719  
19,1,12644.692308  
19,1,4253.314286  
19,1,5540.063830  
19,1,2002.433333  
19,1,1642.134146  
19,1,4527.906250  
19,1,1685.981132  
19,1,6018.405405  
19,1,4276.682500  
19,1,3474.860294  
19,1,1614.545000  
19,1,1621.982639  
19,1,18814.692308  
19,1,1913.550781  
19,1,1720.642857  
19,1,1575.786458  
19,1,2105.695652  
19,1,4789.888889  
19,1,3365.494048  
19,1,1752.687500  
19,1,2326.132353  
19,1,4365.500000  
19,1,5948.933333  
19,1,4449.107558  
19,1,1725.152174  
19,1,1821.633929  
19,1,4730.306818  
19,1,5272.048828  
19,1,1615.013298  
19,1,8099.153846  
19,1,10814.402174  
19,1,3512.097561  
19,1,14195.666667  
19,1,9123.906736  
19,1,4430.814815  
19,1,1654.868243  
19,1,7868.845588  
19,1,2045.769231  
19,1,2327.213816  
19,1,2423.065000  
19,1,4105.500000  
19,1,7087.302966  
19,1,3636.068966  
19,1,5927.269231  
19,1,7300.285714  
19,1,8162.809524  
19,1,2261.789474  
19,1,2727.000000  
19,1,1536.625000  
19,1,19730.281250  
19,1,5093.320755  
19,1,1992.125000  
19,1,17169.974265  
19,1,8417.642857  
19,1,1529.737500  
19,1,9286.466667  
19,1,14642.789062  
19,1,1792.000000  
19,1,1891.107143  
19,1,3603.395270  
19,1,1900.432292  
19,1,1674.448276  
19,1,14322.468750  
19,1,3377.187500

19,1,3287.097222  
19,1,1606.080882  
19,1,1518.856618  
19,1,1782.250000  
19,1,1786.209677  
19,1,4734.559524  
19,1,1798.039062  
19,1,11702.500000  
19,1,3948.977273  
19,1,12996.315217  
19,1,15529.429348  
19,1,1525.625000  
19,1,16948.036932  
19,1,2157.750000  
19,1,1949.909091  
19,1,2023.861111  
19,1,15388.354839  
19,1,2448.767442  
19,1,2189.750000  
19,1,1950.800000  
19,1,1725.694444  
19,1,5253.448276  
19,1,3967.493902  
19,1,3188.078125  
19,1,4125.948718  
19,1,1916.875000  
19,1,7601.460526  
19,1,3371.234694  
19,1,2346.675000  
19,1,4298.125000  
19,1,6481.027174  
19,1,3041.914773  
19,1,2155.076705  
19,1,2266.622396  
19,1,3873.653846  
19,1,3031.538462  
19,1,11018.031250  
19,1,14491.250000  
19,1,9602.585938  
19,1,2185.761628  
19,1,11944.375000  
19,1,1548.861702  
19,1,1761.947368  
19,1,3126.689024  
19,1,3069.433824  
19,1,3272.250000  
19,1,2903.079268  
19,1,3855.099490  
19,1,7915.468750  
19,1,10023.222656  
19,1,2411.220000  
19,1,5575.677778  
19,1,3208.636364  
19,1,1829.814024  
19,1,4173.204082  
19,1,2706.590909  
19,1,1662.176471  
19,1,2595.823529  
19,1,5156.031250  
19,1,2646.650000  
19,1,7930.108974  
19,1,2458.279412  
19,1,2850.837209  
19,1,12362.545455  
19,1,1827.803571  
19,1,2223.495146

19,1,4313.559278  
19,1,12877.503289  
19,1,3273.781250  
19,1,2315.621951  
19,1,2631.212121  
19,1,2520.212500  
19,1,18609.640625  
19,1,3335.375000  
19,1,7631.166667  
19,1,2090.942308  
19,1,8513.392857  
19,1,2930.045455  
19,1,1991.756757  
19,1,6577.590909  
19,1,10977.056122  
19,1,2283.814815  
19,1,4512.116667  
19,1,11469.288462  
19,1,11851.655172  
19,1,5350.000000  
19,1,1858.900000  
19,1,17356.397727  
19,1,2000.390244  
19,1,1646.154605  
19,1,2048.451613  
19,1,3165.609848  
19,1,5646.315789  
19,1,2245.719512  
19,1,6543.851190  
19,1,10075.594388  
19,1,5889.579787  
19,1,2322.881250  
19,1,6120.772727  
19,1,7371.340686  
19,1,8912.141129  
19,1,15486.974265  
19,1,4134.473214  
19,1,2847.570000  
19,1,2298.885135  
19,1,7797.009259  
19,1,1925.948529  
19,1,2075.042553  
19,1,8417.875000  
19,1,12256.475000  
19,1,4777.400000  
19,1,1855.684659  
19,1,3660.654255  
19,1,1582.816176  
19,1,1972.825000  
19,1,11852.104545  
19,1,2984.923077  
19,1,3554.953704  
19,1,1548.587209  
19,1,1830.941176  
19,1,2106.132576  
19,1,6665.096154  
19,1,18898.675676  
19,1,2684.263158  
19,1,5172.189655  
19,1,2866.317308  
19,1,2548.948718  
19,1,4800.518750  
19,1,7432.554688  
19,1,1505.671053  
19,1,6178.750000  
19,1,2706.190476

19,1,1514.916667  
19,1,9645.164474  
19,1,3551.731707  
19,1,4423.017045  
19,1,1828.992021  
19,1,3751.934211  
19,1,5045.928030  
19,1,3673.198529  
19,1,3389.214286  
19,1,2511.616279  
19,1,17758.625000  
19,1,4412.729167  
19,1,2028.607143  
19,1,4473.460938  
19,1,4553.552632  
19,1,9174.264881  
19,1,6777.390625  
19,1,2738.000000  
19,1,3487.125000  
19,1,2834.453125  
19,1,1740.904412  
19,1,3990.581250  
19,1,9246.236842  
19,1,2547.171875  
19,1,4782.487805  
19,1,4232.833333  
19,1,3885.281250  
19,1,2608.891026  
19,1,6267.155488  
19,1,8787.106061  
19,1,4634.946429  
19,1,13268.967391  
19,1,7579.500000  
19,1,12300.812500  
19,1,1865.796875  
19,1,2725.950000  
19,1,5297.629630  
19,1,1535.696429  
19,1,16083.139286  
19,1,7120.100806  
19,1,5063.365385  
19,1,2941.875000  
19,1,2070.425000  
19,1,3573.852941  
19,1,3588.952206  
19,1,1923.631579  
19,1,2501.926471  
19,1,6974.865385  
19,1,4051.632576  
19,1,1608.207031  
19,1,2399.478261  
19,1,11020.625000  
19,1,3902.901042  
19,1,2346.162791  
19,1,9145.222222  
19,1,3803.945652  
19,1,4920.454545  
19,1,3406.649038  
19,1,6525.260870  
19,1,1984.555556  
19,1,4751.132812  
19,1,8522.363636  
19,1,1848.597561  
19,1,2048.712766  
19,1,2903.895349  
19,1,1888.051282

19,1,2369.926829  
19,1,4306.491667  
19,1,3335.625000  
19,1,2505.661458  
19,1,6590.265957  
19,1,5968.600000  
19,1,4727.304348  
19,1,2216.000000  
19,1,2227.893617  
19,1,1506.029412  
19,1,1979.759868  
19,1,4846.267045  
19,1,1544.172794  
19,1,2627.836538  
19,1,1762.750000  
19,1,8444.612805  
19,1,4605.080645  
19,1,3992.036585  
19,1,3340.115000  
19,1,2512.967391  
19,1,1770.070000  
19,1,15938.945833  
19,1,16716.947674  
19,1,1850.319767  
19,1,2504.914062  
19,1,1843.194149  
19,1,10878.352273  
19,1,13950.848684  
19,1,3453.970930  
19,1,1857.173077  
19,1,3654.333333  
19,1,6033.292857  
19,1,7600.954545  
19,1,4720.115385  
19,1,16989.893382  
19,1,1828.357143  
19,1,2354.578947  
19,1,1843.463415  
19,1,3749.738281  
19,1,3146.375000  
19,1,2542.931818  
19,1,10269.763889  
19,1,4474.705729  
19,1,7878.115625  
19,1,4715.815476  
19,1,7104.422619  
19,1,3964.517045  
19,1,6638.093023  
19,1,5389.121324  
19,1,3367.307927  
19,1,6163.145161  
19,1,3164.160000  
19,1,2390.843750  
19,1,1707.619792  
19,1,1733.701923  
19,1,1636.972222  
19,1,8835.294118  
19,1,2231.656250  
19,1,1810.839286  
19,1,5347.830882  
19,1,7357.359375  
19,1,15193.882353  
19,1,8126.978659  
19,1,5975.238095  
19,1,4322.242188  
19,1,2597.857143

19,1,4510.802083  
19,1,4313.306034  
19,1,3150.566176  
19,1,3534.559524  
19,1,2808.836735  
19,1,3458.937500  
19,1,2236.458333  
19,1,10569.323529  
19,1,9893.388298  
19,1,4394.573864  
19,1,2440.220930  
19,1,8473.194444  
19,1,3458.378676  
19,1,3353.679348  
19,1,6830.918478  
19,1,6138.862500  
19,1,2777.553030  
19,1,1797.761628  
19,1,13344.619318  
19,1,10260.986842  
19,1,2159.453488  
19,1,2773.652439  
19,1,1698.428571  
19,1,1554.181818  
19,1,11049.713816  
19,1,3424.595930  
19,1,4007.440574  
19,1,4403.796512  
19,1,3389.328431  
19,1,1865.212766  
19,1,12076.642442  
19,1,7423.655612  
19,1,1532.562500  
19,1,6038.888372  
19,1,14940.474359  
19,1,1792.637931  
19,1,6291.449219  
19,1,3073.265306  
19,1,8951.000000  
19,1,1797.854167  
19,1,2649.017857  
19,1,3241.609375  
19,1,3176.463415  
19,1,1899.781915  
19,1,8223.388587  
19,1,17603.177083  
19,1,9729.551471  
19,1,3545.418478  
19,1,4073.096354  
19,1,2377.301020  
19,1,1715.621094  
19,1,4388.682692  
19,1,1628.454545  
19,1,1730.451087  
19,1,1714.941489  
19,1,1860.850000  
19,1,2206.073171  
19,1,1951.222826  
19,1,6859.048469  
19,1,3828.541667  
19,1,1902.361842  
19,1,19225.758929  
19,1,7040.917553  
19,1,2791.343750  
19,1,1813.826705  
19,1,7745.186047

19,1,7878.969512  
19,1,12944.323529  
19,1,2118.550000  
19,1,1764.227273  
19,1,4385.961111  
19,1,5572.284375  
19,1,5705.843750  
19,1,6752.223404  
19,1,5826.163265  
19,1,1732.218750  
19,1,2142.698718  
19,1,7379.158654  
19,1,7877.071429  
19,1,2536.676471  
19,1,2177.177083  
19,1,6202.820122  
19,1,5792.616279  
19,1,4129.418367  
19,1,2260.093750  
19,1,3496.132812  
19,1,3821.854839  
19,1,5469.166667  
19,1,3288.333333  
19,1,2993.362069  
19,1,3593.081250  
19,1,5398.210938  
19,1,3676.929487  
19,1,7285.883929  
19,1,2012.524390  
19,1,1956.351064  
19,1,4290.083333  
19,1,7319.284884  
19,1,1914.504808  
19,1,1831.530303  
19,1,10577.854839  
19,1,2555.538462  
19,1,1523.750000  
19,1,8129.257353  
19,1,10813.415323  
19,1,1879.306818  
19,1,2540.068182  
19,1,11799.215000  
19,1,9484.454787  
19,1,3305.586111  
19,1,5457.172414  
19,1,6348.077586  
19,1,5196.823529  
19,1,2408.833333  
19,1,1665.991667  
19,1,3724.913043  
19,1,2478.232955  
19,1,1967.312500  
19,1,10893.947674  
19,1,3665.609756  
19,1,2210.562500  
19,1,4281.178571  
19,1,15493.108333  
19,1,1601.111111  
19,1,2665.260417  
19,1,3743.894737  
19,1,11306.142857  
19,1,1914.800000  
19,1,17239.284884  
19,1,2218.867021  
19,1,2434.352941  
19,1,4738.363095

19,1,1609.583333  
19,1,2732.589744  
19,1,8898.790761  
19,1,12992.936170  
19,1,16708.320513  
19,1,2234.707447  
19,1,5082.741379  
19,1,10145.815476  
19,1,4248.000000  
19,1,2342.283784  
19,1,1555.980114  
19,1,11075.059524  
19,1,12842.200000  
19,1,1856.628571  
19,1,2903.350000  
19,1,2288.592105  
19,1,2955.317935  
19,1,2570.619048  
19,1,1628.120192  
19,1,2431.991477  
19,1,2820.736111  
19,1,15987.420000  
19,1,4639.729167  
19,1,17779.578125  
19,1,2204.743902  
19,1,4079.788889  
19,1,5062.100000  
19,1,5537.801282  
19,1,17262.936170  
19,1,4132.625000  
19,1,2356.585938  
19,1,7923.063830  
19,1,5875.846154  
19,1,5339.732955  
19,1,2962.396739  
19,1,2328.892045  
19,1,2495.521277  
19,1,8885.385135  
19,1,5455.500000  
19,1,1985.503571  
19,1,2322.558140  
19,1,4922.529412  
19,1,1784.794872  
19,1,2176.897436  
19,1,2330.898936  
19,1,19373.785714  
19,1,2037.894022  
19,1,14718.194853  
19,1,1908.740854  
19,1,7216.425000  
19,1,5023.740000  
19,1,1937.367424  
19,1,1537.387097  
19,1,1902.837500  
19,1,2557.233871  
19,1,8581.563889  
19,1,9194.164634  
19,1,2543.038889  
19,1,2431.872449  
19,1,1661.940625  
19,1,4110.898649  
19,1,1640.433824  
19,1,4538.058333  
19,1,4352.848485  
19,1,4087.425000  
19,1,2039.652174

19,1,4600.266667  
19,1,13944.805000  
19,1,19065.720833  
19,1,2552.350000  
20,2,1975.127841  
20,2,3511.206522  
20,2,2738.893617  
20,2,1702.189024  
20,2,9596.483333  
20,2,2205.072115  
20,2,4936.095588  
20,2,1978.511364  
20,2,1630.850000  
20,2,9016.465278  
20,2,1727.655405  
20,2,1869.812500  
20,2,1697.700658  
20,2,2022.447115  
20,2,5884.923913  
20,2,3928.719697  
20,2,2447.465116  
20,2,2303.014535  
20,2,2631.965116  
20,2,1982.115385  
20,2,2473.601064  
20,2,2448.654891  
20,2,2742.302632  
20,2,9499.848837  
20,2,1680.300000  
20,2,1806.587838  
20,2,1572.015625  
20,2,4153.500000  
20,2,2022.202381  
20,2,3415.218750  
20,2,1926.639423  
20,2,2185.115385  
20,2,5864.368421  
20,2,1869.925000  
20,2,1935.441489  
20,2,1695.844828  
20,2,2495.526316  
20,2,1685.147727  
20,2,2833.743750  
20,2,2343.268519  
20,2,2189.750000  
20,2,1501.359375  
20,2,4685.161364  
20,2,2119.464286  
20,2,2738.000000  
20,2,1645.122449  
20,2,1905.022500  
20,2,2858.054245  
20,2,3147.727273  
20,2,2732.420455  
20,2,3333.232955  
20,2,4592.841346  
20,2,2863.844262  
20,2,1519.321429  
20,2,2393.902439  
20,2,2212.565217  
20,2,1803.595395  
20,2,1799.915000  
20,2,3406.775943  
20,2,1830.270000  
20,2,4250.209302  
20,2,1977.468750

20,2,9856.687500  
20,2,2273.750000  
20,2,2525.338235  
20,2,1744.147727  
20,2,1582.625000  
20,2,1516.590116  
20,2,1918.738095  
20,2,2613.500000  
20,2,4681.843750  
20,2,1958.864865  
20,2,2136.930233  
20,2,1619.732759  
20,2,1794.666667  
20,2,2741.747396  
20,2,1936.433735  
20,2,1696.218750  
20,2,1816.281250  
20,2,1909.571970  
20,2,2378.022321  
20,2,2114.667614  
20,2,1558.477273  
20,2,3582.691038  
20,2,2608.920000  
20,2,1649.448370  
20,2,4246.296053  
20,2,2851.160000  
20,2,1717.869231  
20,2,1853.911111  
20,2,2370.446809  
20,2,2138.005814  
20,2,2203.512195  
20,2,2086.656250  
20,2,1663.177083  
20,2,1540.819444  
20,2,2182.303030  
20,2,2058.110577  
20,2,1912.392857  
20,2,1909.994898  
20,2,1983.933333  
20,2,2153.184028  
20,2,1548.457317  
20,2,2863.703125  
20,2,1869.477273  
20,2,2743.459821  
20,2,1863.528846  
20,2,2265.355769  
20,2,2867.833333  
20,2,3875.643617  
20,2,3025.197368  
20,2,2665.387500  
20,2,1643.707447  
20,2,1685.928571  
20,2,1966.642458  
20,2,2644.530837  
20,2,2087.266055  
20,2,2548.008929  
20,2,2684.434524  
20,2,2046.648256  
20,2,2053.732143  
20,2,2206.271875  
20,2,3862.450000  
20,2,1548.069149  
20,2,1575.312500  
20,2,1730.904255  
20,2,1681.574324  
20,2,1777.617647

20,2,5287.375000  
20,2,5978.375000  
20,2,1529.187500  
20,2,1699.097561  
20,2,2397.888158  
20,2,3056.897959  
20,2,1638.542553  
20,2,1650.636364  
20,2,2344.333333  
20,2,1819.382812  
20,2,1747.388298  
20,2,3457.130000  
20,2,2051.012195  
20,2,2461.817308  
20,2,2539.787234  
20,2,2958.727941  
20,2,2464.230769  
20,2,2957.511628  
20,2,3416.470588  
20,2,1717.744186  
20,2,1954.377778  
20,2,2254.233333  
20,2,3095.812500  
20,2,2880.381579  
20,2,5753.566667  
20,2,2201.569444  
20,2,1713.750000  
20,2,2694.050000  
20,2,2206.716346  
20,2,1613.051020  
20,2,2136.000000  
20,2,19102.581818  
20,2,2480.581081  
20,2,1995.605769  
20,2,1632.237500  
20,2,3848.678571  
20,2,2866.953488  
20,2,2919.429687  
20,2,1810.500000  
20,2,1554.968750  
20,2,1904.021277  
20,2,2121.740000  
20,2,2089.933824  
20,2,1652.140704  
20,2,1709.771654  
20,2,1797.837500  
20,2,1580.840909  
20,2,2640.595745  
20,2,1687.319149  
20,2,5448.016447  
20,2,2701.638298  
20,2,4871.384804  
20,2,1503.317708  
20,2,2006.648649  
20,2,2203.984043  
20,2,1933.455357  
20,2,1628.058511  
20,2,1641.282609  
20,2,1538.902778  
20,2,1730.302326  
20,2,1635.367647  
20,2,1516.400000  
20,2,6569.397500  
20,2,2912.785326  
20,2,2716.093137  
20,2,13532.571429

20,2,2145.000000  
20,2,1532.156250  
20,2,1516.815000  
20,2,2446.143868  
20,2,1716.796875  
20,2,6247.585427  
20,2,1920.712500  
20,2,1859.595000  
20,2,2102.693878  
20,2,2093.600000  
20,2,1621.670732  
20,2,1893.435976  
20,2,2254.447368  
20,2,1862.782609  
20,2,2413.595109  
20,2,1887.761905  
20,2,3237.911585  
20,2,1886.375000  
20,2,1829.245283  
20,2,1828.901316  
20,2,1620.091463  
20,2,1625.820312  
20,2,1570.715000  
20,2,1988.770833  
20,2,2912.434524  
20,2,1650.243902  
20,2,7516.984375  
20,2,4838.875000  
20,2,1620.000000  
20,2,1530.567708  
20,2,2801.083333  
20,2,1555.823864  
20,2,2610.556604  
20,2,6534.941860  
20,2,1767.140625  
20,2,1504.634615  
20,2,2061.492424  
20,2,1879.266667  
20,2,3706.666667  
20,2,2017.732143  
20,2,1700.466667  
20,2,1643.703704  
20,2,2378.199074  
20,2,13849.542857  
20,2,3890.250000  
20,2,2709.985294  
20,2,1840.432292  
20,2,2605.305000  
20,2,1661.428571  
20,2,2085.283019  
20,2,1610.108108  
20,2,4265.967742  
20,2,1945.445946  
20,2,1695.986842  
20,2,2089.163462  
20,2,2004.449468  
20,2,2700.875000  
20,2,1877.857143  
20,2,3377.953488  
20,2,1695.802632  
20,2,1629.203125  
20,2,1716.365909  
20,2,1768.000000  
20,2,2800.163043  
20,2,2043.502976  
20,2,6930.208333

20,2,2827.756579  
20,2,2153.542763  
20,2,2759.443182  
20,2,6922.125000  
20,2,2657.329268  
20,2,2805.410000  
20,2,1731.737500  
20,2,3217.540948  
20,2,1828.107955  
20,2,1585.625000  
20,2,2011.062500  
20,2,2519.529412  
20,2,3285.549342  
20,2,7598.047619  
20,2,2113.834135  
20,2,1652.810897  
20,2,3372.365854  
20,2,2428.830000  
20,2,1837.250000  
20,2,1617.547794  
20,2,1533.275000  
20,2,2814.467105  
20,2,2436.632653  
20,2,1826.677326  
20,2,3523.023936  
20,2,1960.062500  
20,2,2450.534091  
20,2,3177.705882  
20,2,1668.468750  
20,2,1547.170213  
20,2,2375.733333  
20,2,6133.956522  
20,2,2044.187500  
20,2,2954.673469  
20,2,2388.307692  
20,2,1772.694444  
20,2,2551.168367  
20,2,1584.529762  
20,2,1570.240854  
20,2,4712.418367  
20,2,1577.736979  
20,2,2301.204082  
20,2,2040.503676  
20,2,1738.044271  
20,2,1527.474265  
20,2,4378.276074  
20,2,2623.333333  
20,2,7342.821429  
20,2,4557.067797  
20,2,1633.083333  
20,2,1650.174569  
20,2,2223.179426  
20,2,1543.095000  
20,2,2429.028302  
20,2,2385.315476  
20,2,3124.928571  
20,2,12519.617187  
20,2,3803.584906  
20,2,1563.913043  
20,2,2663.696078  
20,2,5426.875000  
20,2,2792.239362  
20,2,2927.648936  
20,2,1503.276042  
20,2,1621.770000  
20,2,1533.391892

20,2,1734.714286  
20,2,3760.978659  
20,2,1790.446429  
20,2,1508.546053  
20,2,2836.941176  
20,2,1818.250000  
20,2,3678.673469  
20,2,2827.774510  
20,2,1659.866667  
20,2,2849.071429  
20,2,3013.652439  
20,2,2299.642857  
20,2,3463.250000  
20,2,5209.250000  
20,2,4622.500000  
20,2,1820.397059  
20,2,8070.097222  
20,2,2049.497159  
20,2,1745.218009  
20,2,1930.779762  
20,2,1811.168367  
20,2,2533.325000  
20,2,2377.733696  
20,2,1758.470588  
20,2,1969.911184  
20,2,1564.035714  
20,2,1770.699468  
20,2,1616.845109  
20,2,1723.668919  
20,2,1654.610465  
20,2,2528.078125  
20,2,1909.351744  
20,2,1601.329861  
20,2,4016.025943  
20,2,1788.128906  
20,2,2068.041667  
20,2,2129.500000  
20,2,2045.431122  
20,2,2050.750000  
20,2,1592.848485  
20,2,2367.117647  
20,2,1657.905660  
20,2,8553.653125  
20,2,1941.562500  
20,2,2561.228723  
20,2,1622.779605  
20,2,5323.933511  
20,2,1846.198864  
20,2,3180.311111  
20,2,1704.163265  
20,2,1903.009615  
20,2,1683.284314  
20,2,3344.600000  
20,2,1907.210227  
20,2,1589.345395  
20,2,4226.750000  
20,2,3187.531250  
20,2,5116.736842  
20,2,2109.469512  
20,2,1550.486486  
20,2,2838.000000  
20,2,1641.055556  
20,2,1922.317568  
20,2,1765.756757  
20,2,3594.284314  
20,2,2900.371429

20,2,1760.084302  
20,2,2599.505435  
20,2,2221.541667  
20,2,1991.269231  
20,2,1673.413265  
20,2,1638.463918  
20,2,2152.950000  
20,2,2883.225490  
20,2,11786.296512  
20,2,2212.552632  
20,2,1628.125000  
20,2,2243.725000  
20,2,1770.835227  
20,2,2400.980000  
20,2,3296.436275  
20,2,2714.072674  
20,2,2877.000000  
20,2,1545.156250  
20,2,1566.687500  
20,2,5079.217262  
20,2,1693.688679  
20,2,1650.003378  
20,2,2401.625000  
20,2,3449.191860  
20,2,1798.178571  
20,2,2579.027174  
20,2,2858.872396  
20,2,9841.434783  
20,2,1874.569149  
20,2,2615.457547  
20,2,2203.492647  
20,2,1934.436170  
20,2,7991.784722  
20,2,2089.245536  
20,2,4184.851351  
20,2,3137.280000  
20,2,1903.747222  
20,2,2098.316327  
20,2,1874.205357  
20,2,2173.233696  
20,2,1523.950000  
20,2,2300.750000  
20,2,3725.476351  
20,2,3257.125000  
20,2,5181.518617  
20,2,3378.877119  
20,2,3151.785714  
20,2,1874.778646  
20,2,1784.358333  
20,2,3833.933824  
20,2,2733.312500  
20,2,2714.774194  
20,2,1696.462500  
20,2,2388.505319  
20,2,5393.218750  
20,2,2019.959459  
20,2,1784.607955  
20,2,4162.821429  
20,2,2826.174020  
20,2,5327.447581  
20,2,1938.678571  
20,2,1747.489583  
20,2,2095.831081  
20,2,1808.420455  
20,2,2481.689189  
20,2,2576.640625

20,2,1801.345000  
20,2,1679.311224  
20,2,2569.000000  
20,2,3602.682292  
20,2,1811.387500  
20,2,1794.967391  
20,2,1572.062500  
20,2,1678.852941  
20,2,5047.824468  
20,2,2545.000000  
20,2,2421.035714  
20,2,2836.310897  
20,2,1613.133929  
20,2,1519.971098  
20,2,2276.264706  
20,2,1642.861111  
20,2,2305.424242  
20,2,1660.403846  
20,2,2406.434783  
20,2,1509.826220  
20,2,1816.853659  
20,2,2581.841463  
20,2,2460.432065  
20,2,1581.682692  
20,2,4502.217391  
20,2,2925.452381  
20,2,1715.887195  
20,2,2185.467742  
20,2,3659.291667  
20,2,2547.600000  
20,2,3569.612500  
20,2,8107.037736  
20,2,2312.593750  
20,2,3846.722222  
20,2,1586.070833  
20,2,1504.693878  
20,2,2592.736111  
20,2,2271.891304  
20,2,1768.687500  
20,2,1860.075000  
20,2,2322.116279  
20,2,1640.646226  
20,2,2339.244898  
20,2,2053.037500  
20,2,1710.162109  
20,2,1799.255319  
20,2,1704.000000  
20,2,1775.383929  
20,2,3902.566176  
20,2,1510.509615  
20,2,1806.282051  
20,2,1557.179878  
20,2,1723.298246  
20,2,2623.724490  
20,2,2387.000000  
20,2,1751.247396  
20,2,4487.369565  
20,2,10534.914773  
20,2,1541.275000  
20,2,2010.302083  
20,2,2982.500000  
20,2,2284.913043  
20,2,1691.230000  
20,2,3902.939189  
20,2,4172.975000  
20,2,2170.241071

20,2,2054.597222  
20,2,1749.805000  
20,2,2427.437500  
20,2,1735.568182  
20,2,2471.414474  
20,2,2109.466146  
20,2,2254.156250  
20,2,7143.083333  
20,2,2635.818966  
20,2,1931.786765  
20,2,2211.506410  
20,2,1512.109375  
20,2,2125.759615  
20,2,3426.288462  
20,2,9372.000000  
20,2,4064.310976  
20,2,2941.727500  
20,2,2116.344444  
20,2,1599.072368  
20,2,1584.319767  
20,2,2644.824561  
20,2,2096.690476  
20,2,3408.240196  
20,2,1727.724265  
20,2,3209.932692  
20,2,1881.618750  
20,2,1667.558140  
20,2,3389.254237  
20,2,1572.591837  
20,2,1928.481250  
20,2,3085.923295  
20,2,1748.551471  
20,2,1802.834184  
20,2,1522.537736  
20,2,2424.465909  
20,2,1613.535326  
20,2,2065.858173  
20,2,5510.451531  
20,2,3259.750000  
20,2,2199.645833  
20,2,1582.428571  
20,2,1927.700000  
20,2,2621.718750  
20,2,2951.155612  
20,2,1674.875000  
20,2,4674.440789  
20,2,2004.544872  
20,2,3924.500000  
20,2,2416.109375  
20,2,3191.371795  
20,2,2302.723684  
20,2,1887.820513  
20,2,7736.888889  
20,2,1538.480000  
20,2,3517.735294  
20,2,5563.384615  
20,2,2271.725806  
20,2,2366.877660  
20,2,3312.750000  
20,2,2092.244681  
20,2,1699.705729  
20,2,1885.592105  
20,2,2579.415816  
20,2,1975.414894  
20,2,3989.222222  
20,2,1719.112745

20,2,1587.136364  
20,2,2161.441038  
20,2,1815.476562  
20,2,2201.647727  
20,2,2581.260870  
20,2,2394.111702  
20,2,1789.427632  
20,2,1992.852778  
20,2,3033.659091  
20,2,2092.500000  
20,2,2896.714286  
20,2,1576.877604  
20,2,2586.360795  
20,2,1558.947368  
20,2,1743.976190  
20,2,3399.936275  
20,2,1579.160714  
20,2,13851.173529  
20,2,1535.477273  
20,2,1879.181818  
20,2,3123.975000  
20,2,1682.493750  
20,2,3606.706522  
20,2,1959.236111  
20,2,1598.926471  
20,2,1577.625000  
20,2,2361.479730  
20,2,1653.153509  
20,2,1800.832258  
20,2,2798.417763  
20,2,1641.127500  
20,2,2072.750000  
20,2,1926.021739  
20,2,1589.375000  
20,2,2438.736413  
20,2,1563.864865  
20,2,2206.835000  
20,2,8177.342213  
20,2,1751.571429  
20,2,1609.431452  
20,2,2248.600000  
20,2,2045.451705  
20,2,2485.135747  
20,2,2391.993902  
20,2,3169.710938  
20,2,1516.365000  
20,2,2614.490385  
20,2,1801.480263  
20,2,1734.190000  
20,2,2140.437500  
20,2,4253.680000  
20,2,2501.419355  
20,2,1810.732143  
20,2,3050.362245  
20,2,1719.000000  
20,2,3196.588068  
20,2,1553.148936  
20,2,2122.800926  
20,2,4702.429348  
20,2,2344.218750  
20,2,1804.069767  
20,2,2044.961538  
20,2,1877.083333  
20,2,3905.250000  
20,2,2572.000000  
20,2,2548.633523

20,2,1690.147436  
20,2,6616.802632  
20,2,1644.847458  
20,2,2087.799020  
20,2,1644.877907  
20,2,2478.746528  
20,2,1931.497768  
20,2,2527.572674  
20,2,2288.536585  
20,2,2693.105769  
20,2,2016.200000  
20,2,3540.004808  
20,2,1504.744681  
20,2,1733.714286  
20,2,3708.456522  
20,2,2176.548780  
20,2,1786.788889  
20,2,1636.357143  
20,2,1614.815789  
20,2,1710.144231  
20,2,5393.550000  
20,2,1893.232143  
20,2,2691.851852  
20,2,2551.134615  
20,2,2082.051724  
20,2,2437.302632  
20,2,2107.705882  
20,2,3491.769231  
20,2,2817.421875  
20,2,2137.919811  
20,2,5918.896226  
20,2,2051.195122  
20,2,1680.139151  
20,2,2086.890000  
20,2,2091.026596  
20,2,3112.975610  
20,2,1504.959459  
20,2,5039.643617  
20,2,1629.423469  
20,2,2185.415761  
20,2,2070.093750  
20,2,1504.039062  
20,2,2325.966981  
20,2,1990.844444  
20,2,5142.408088  
20,2,2819.403846  
20,2,2252.281250  
20,2,3509.536585  
20,2,3814.500000  
20,2,3143.117647  
20,2,4829.875000  
20,2,3341.495000  
20,2,1721.303571  
20,2,1632.112805  
20,2,1862.015086  
20,2,1648.513514  
20,2,1582.000000  
20,2,1915.636364  
20,2,3613.434659  
20,2,2058.702128  
20,2,2348.750000  
20,2,1635.050000  
20,2,1781.947368  
20,2,2270.750000  
20,2,5480.121711  
20,2,6434.500000

20,2,1723.511111  
20,2,2850.111413  
20,2,2287.345588  
20,2,2195.187500  
20,2,1755.758929  
20,2,2293.719262  
20,2,3553.375000  
20,2,1560.820513  
20,2,3521.610714  
20,2,2106.783654  
20,2,2233.500000  
20,2,2946.651961  
20,2,1567.826087  
20,2,1745.857955  
20,2,1784.542453  
20,2,2699.378906  
20,2,2452.847561  
20,2,2325.475000  
20,2,1629.047297  
20,2,1563.093750  
20,2,1860.616071  
20,2,4566.125000  
20,2,2628.150000  
20,2,2253.258929  
20,2,2037.921053  
20,2,1714.070652  
20,2,2869.230769  
20,2,1791.867347  
20,2,2292.500000  
20,2,1832.595238  
20,2,4527.866667  
20,2,3011.493243  
20,2,1623.424242  
20,2,1540.600000  
20,2,2536.794118  
20,2,1917.764706  
20,2,3203.342500  
20,2,2904.060976  
20,2,2076.950980  
20,2,1562.111111  
20,2,1923.183333  
20,2,1651.750000  
20,2,1502.375000  
20,2,2788.696429  
20,2,2385.912791  
20,2,6922.389535  
20,2,1772.860465  
20,2,1561.028571  
20,2,3413.394737  
20,2,1791.602041  
20,2,2431.840625  
20,2,2001.211735  
20,2,1852.133721  
20,2,2454.600000  
20,2,2589.700000  
20,2,2793.500000  
20,2,2954.262500  
20,2,2616.102041  
20,2,1869.414773  
20,2,1605.045673  
20,2,4007.203125  
20,2,1566.807292  
20,2,2125.545455  
20,2,2365.192308  
20,2,3995.203125  
20,2,2223.906977

20,2,2513.787234  
20,2,3032.220000  
20,2,1681.312500  
20,2,1681.139706  
20,2,1702.851064  
20,2,5203.481132  
20,2,1566.153125  
20,2,5953.508523  
20,2,1990.057692  
20,2,2771.079545  
20,2,2137.127660  
20,2,2695.388889  
20,2,1942.500000  
20,2,2337.555556  
20,2,1507.750000  
20,2,2069.459016  
20,2,3411.205882  
20,2,2035.500000  
20,2,2103.875000  
20,2,1970.789474  
20,2,2514.241477  
20,2,1697.416667  
20,2,3260.671053  
20,2,3213.312500  
20,2,1996.018182  
20,2,1949.236979  
20,2,1645.560811  
20,2,3318.574219  
20,2,2736.115385  
20,2,3364.382979  
20,2,4060.383333  
20,2,1724.453431  
20,2,3539.750000  
20,2,2080.616848  
20,2,3396.794872  
20,2,4323.682065  
20,2,2709.507812  
20,2,2149.513158  
20,2,1750.687500  
20,2,1639.425781  
20,2,2396.434783  
20,2,2634.941176  
20,2,1591.847826  
20,2,1525.275000  
20,2,7834.750000  
20,2,2479.938596  
20,2,4113.906250  
20,2,1514.259615  
20,2,1657.062500  
20,2,1747.107143  
20,2,3280.039062  
20,2,3040.265625  
20,2,2829.375000  
20,2,1738.803030  
20,2,2752.230769  
20,2,3039.861111  
20,2,5380.953125  
20,2,2229.119318  
20,2,1915.266129  
20,2,3442.176136  
20,2,2346.882353  
20,2,3694.625000  
20,2,2175.441176  
20,2,2110.068878  
20,2,1602.638587  
20,2,3535.882353

20,2,1808.931548  
20,2,1578.989796  
20,2,1629.923077  
20,2,1630.750000  
20,2,1558.914894  
20,2,1509.571429  
20,2,1746.080882  
20,2,2576.031250  
20,2,1681.636905  
20,2,2324.779762  
20,2,1751.913462  
20,2,2093.983553  
20,2,2241.474359  
20,2,1850.307692  
20,2,1570.078947  
20,2,2136.986111  
20,2,1659.944444  
20,2,1712.819196  
20,2,1986.494792  
20,2,3719.813953  
20,2,1709.527778  
20,2,1524.312500  
20,2,2626.125000  
20,2,3048.722222  
20,2,1603.097561  
20,2,2862.900000  
20,2,1684.858974  
20,2,1761.000000  
20,2,1514.546875  
20,2,1882.076923  
20,2,2177.860000  
20,2,1564.908537  
20,2,1892.883333  
20,2,2361.290625  
20,2,2020.652778  
20,2,1732.133721  
20,2,1661.166667  
20,2,1583.128205  
20,2,4952.487805  
20,2,1755.340517  
20,2,2097.181818  
20,2,1749.291667  
20,2,2081.979167  
20,2,2452.159884  
20,2,2435.664474  
20,2,3999.012821  
20,2,1598.154605  
20,2,1529.812500  
20,2,2044.355769  
20,2,2374.305921  
20,2,1658.094595  
20,2,1509.514423  
20,2,2143.576923  
20,2,2693.956250  
20,2,3148.284884  
20,2,1507.285714  
20,2,3329.312500  
20,2,1580.500000  
20,2,1558.625000  
20,2,2217.553191  
20,2,1521.086111  
20,2,2196.303191  
20,2,2348.863636  
20,2,2169.800000  
20,2,2076.590426  
20,2,2544.928571

20,2,1609.515625  
20,2,1714.930380  
20,2,1935.573529  
20,2,5596.813953  
20,2,7593.909091  
20,2,8735.725000  
20,2,7212.794118  
20,2,2311.280612  
20,2,2783.343137  
20,2,1541.742647  
20,2,2165.827500  
20,2,2522.250000  
20,2,3311.176282  
20,2,4576.220930  
20,2,2622.910000  
20,2,1745.364583  
20,2,3286.302500  
20,2,2026.344444  
20,2,1943.147500  
20,2,1971.586735  
20,2,1662.917683  
20,2,3420.420455  
20,2,1988.000000  
20,2,3895.736111  
20,2,1885.400000  
20,2,1751.500000  
20,2,4239.729730  
20,2,2130.157143  
20,2,7887.481707  
20,2,1742.847973  
20,2,2145.568182  
20,2,2642.307377  
20,2,1928.459459  
20,2,2618.535714  
20,2,1613.264151  
20,2,1949.724490  
20,2,3490.882812  
20,2,3364.032609  
20,2,2858.176471  
20,2,1856.673246  
20,2,1835.461538  
20,2,1504.837209  
20,2,1632.575581  
20,2,1515.946429  
20,2,1931.590909  
20,2,2244.891667  
20,2,3049.968750  
20,2,1591.256579  
20,2,1950.858696  
20,2,2317.622283  
20,2,6575.881944  
20,2,1546.705882  
20,2,2931.500000  
20,2,2694.468571  
20,2,1572.676829  
20,2,6101.757653  
20,2,3959.059896  
20,2,1988.622396  
20,2,2162.413043  
20,2,2779.941038  
20,2,1682.750000  
20,2,1527.511364  
20,2,6331.440000  
20,2,3028.387755  
20,2,2132.750000  
20,2,1601.700000

20,2,1506.132653  
20,2,1609.996622  
20,2,4592.687500  
20,2,2837.026042  
20,2,4211.953804  
20,2,1699.156863  
20,2,2479.178571  
20,2,1551.925781  
20,2,3319.978723  
20,2,2347.471698  
20,2,2451.303191  
20,2,4120.250000  
20,2,1971.000000  
20,2,2294.570000  
20,2,2248.000000  
20,2,3241.353261  
20,2,1545.356707  
20,2,1613.336957  
20,2,3278.760000  
20,2,2069.523256  
20,2,2431.808962  
20,2,1713.722222  
20,2,2122.824519  
20,2,1958.088710  
20,2,1732.024590  
20,2,2377.560345  
20,2,1926.413265  
20,2,1567.613636  
20,2,1966.432990  
20,2,1889.820513  
20,2,1815.598214  
20,2,2314.944444  
20,2,2926.278409  
20,2,3887.630435  
20,2,1714.312500  
20,2,2349.420455  
20,2,2157.171875  
20,2,2407.320000  
20,2,1840.642857  
20,2,3466.860656  
20,2,2121.267857  
20,2,3468.062500  
20,2,2035.288136  
20,2,2759.414773  
20,2,1747.025000  
20,2,1505.500000  
20,2,3320.086957  
20,2,2252.650000  
20,2,2117.573529  
20,2,3209.331140  
20,2,8661.082447  
20,2,1556.946429  
20,2,13399.295455  
20,2,1965.656250  
20,2,2499.184028  
20,2,1690.877717  
20,2,3075.591216  
20,2,5579.125000  
20,2,2447.742424  
20,2,1536.828125  
20,2,3846.517857  
20,2,1512.475806  
20,2,3753.814103  
20,2,4887.502119  
20,2,7336.285714  
20,2,2196.699074

20,2,1689.912500  
20,2,1739.802632  
20,2,1720.252841  
20,2,1532.365385  
20,2,1713.579787  
20,2,2583.208333  
20,2,3659.454545  
20,2,2471.150000  
20,2,1598.156250  
20,2,1601.734043  
20,2,2000.821429  
20,2,3601.950000  
20,2,2495.838415  
20,2,2159.929245  
20,2,1750.715909  
20,2,1543.882353  
20,2,1878.955882  
20,2,2540.690476  
20,2,4262.766667  
20,2,2391.963068  
20,2,3959.865566  
20,2,2765.727500  
20,2,1891.968750  
20,2,2197.281250  
20,2,1718.214286  
20,2,1534.003289  
20,2,2617.780488  
20,2,2954.625000  
20,2,3105.431250  
20,2,1681.377551  
20,2,1874.914063  
20,2,2641.583333  
20,2,1745.904412  
20,2,2593.875000  
20,2,2430.100000  
20,2,3421.018293  
20,2,2019.106383  
20,2,3232.537500  
20,2,2090.550000  
20,2,2401.166667  
20,2,1767.250000  
20,2,1896.804487  
20,2,3491.933673  
20,2,4519.568878  
20,2,1703.221106  
20,2,3027.636364  
20,2,5878.068627  
20,2,4806.377358  
20,2,2388.857143  
20,2,2546.110000  
20,2,2154.045455  
20,2,1788.923077  
20,2,1847.797170  
20,2,2081.921569  
20,2,3111.958333  
20,2,1955.485294  
20,2,1737.978125  
20,2,3006.456897  
20,2,1591.199324  
20,2,1621.497283  
20,2,1626.452381  
20,2,2826.000000  
20,2,2848.593750  
20,2,2500.544271  
20,2,2607.893617  
20,2,1812.480769

20,2,1663.471154  
20,2,1868.768229  
20,2,1986.462963  
20,2,1833.586735  
20,2,2136.323529  
20,2,1887.684783  
20,2,11593.878378  
20,2,4506.194444  
20,2,2014.115385  
20,2,7388.297619  
20,2,1711.659091  
20,2,2143.722727  
20,2,2704.046875  
20,2,3091.209302  
20,2,1696.846429  
20,2,1747.569149  
20,2,2005.162234  
20,2,2075.833333  
20,2,2050.533854  
20,2,6104.591837  
20,2,1774.280488  
20,2,3274.032609  
20,2,1734.412037  
20,2,3837.681818  
20,2,1965.125000  
20,2,2358.143293  
20,2,2585.021739  
20,2,3917.495192  
20,2,8450.041667  
20,2,1694.047619  
20,2,1644.097561  
20,2,1767.309524  
20,2,2624.938776  
20,2,1636.420000  
20,2,2106.892308  
20,2,1722.401786  
20,2,12520.553571  
20,2,3687.500000  
20,2,1836.647783  
20,2,2254.557292  
20,2,1746.345745  
20,2,2025.448113  
20,2,1828.383152  
20,2,1513.855556  
20,2,1538.570313  
20,2,2348.146277  
20,2,1669.355263  
20,2,2693.328125  
20,2,1591.843750  
20,2,1746.938889  
20,2,3459.338542  
20,2,2261.997093  
20,2,8038.605769  
20,2,1897.037234  
20,2,3141.368421  
20,2,1944.822368  
20,2,2374.176471  
20,2,1938.625000  
20,2,3933.502551  
20,2,1998.788043  
20,2,1718.378378  
20,2,3836.323370  
20,2,2371.053191  
20,2,1839.634615  
20,2,2404.981818  
20,2,2074.385638

20,2,2795.517857  
20,2,2307.846154  
20,2,1810.074468  
20,2,1928.940476  
20,2,2270.672500  
20,2,1510.014423  
20,2,1883.217949  
20,2,2934.491279  
20,2,7230.341463  
20,2,1499.828488  
20,2,2102.156250  
20,2,2162.854167  
20,2,1550.714286  
20,2,1508.454268  
20,2,1732.022727  
20,2,4858.512500  
20,2,1817.549133  
20,2,1840.408019  
20,2,2324.836364  
20,2,1892.160714  
20,2,2054.444444  
20,2,2435.579545  
20,2,1769.112069  
20,2,2562.071429  
20,2,2277.259259  
20,2,1573.878049  
20,2,2008.140625  
20,2,1935.558824  
20,2,3183.669643  
20,2,11373.688596  
20,2,2297.025735  
20,2,1863.989796  
20,2,2192.625000  
20,2,2810.891892  
20,2,2492.823529  
20,2,2888.450000  
20,2,1603.598837  
20,2,2857.067308  
20,2,1853.910714  
20,2,2123.673077  
20,2,2027.536458  
20,2,1655.471591  
20,2,3107.889706  
20,2,2910.952128  
20,2,1778.430233  
20,2,2174.845238  
20,2,4305.243243  
20,2,2281.112500  
20,2,2204.766304  
20,2,5946.042553  
20,2,1605.425373  
20,2,4237.430556  
20,2,2050.040201  
20,2,1867.449219  
20,2,6798.000000  
20,2,2425.144022  
20,2,1538.208333  
20,2,1888.050000  
20,2,1834.184211  
20,2,1639.222826  
20,2,4014.210526  
20,2,2335.590426  
20,2,2082.895833  
20,2,4547.875000  
20,2,2104.686047  
20,2,2124.514205

20,2,2289.848039  
20,2,2832.670455  
20,2,1618.226563  
20,2,1910.780000  
20,2,3442.076087  
20,2,1776.267442  
20,2,3433.398305  
20,2,3100.700000  
20,2,1515.705882  
20,2,2224.676471  
20,2,1692.300000  
20,2,1855.375000  
20,2,1578.535714  
20,2,3282.775000  
20,2,1790.406250  
20,2,2156.809783  
20,2,1674.996094  
20,2,3165.553191  
20,2,1870.085000  
20,2,3508.184783  
20,2,2614.558442  
20,2,2624.206250  
20,2,1500.000000  
20,2,1774.222222  
20,2,1560.951705  
20,2,2909.853659  
20,2,1596.250000  
20,2,2325.285000  
20,2,2739.756757  
20,2,1853.580000  
20,2,2197.357143  
20,2,2416.800000  
20,2,1678.076220  
20,2,1538.125000  
20,2,4447.775510  
20,2,2620.421196  
20,2,1990.991935  
20,2,1511.250000  
20,2,2788.475000  
20,2,1995.526316  
20,2,2493.886905  
20,2,4453.950000  
20,2,3494.345238  
20,2,2532.785714  
20,2,3347.159574  
20,2,1815.375000  
20,2,1930.017857  
20,2,2932.875000  
20,2,8294.600000  
20,2,1603.825000  
20,2,6534.187500  
20,2,2001.975000  
20,2,1748.987500  
20,2,2427.000000  
20,2,1551.812500  
20,2,2283.087500  
20,2,3125.564103  
20,2,2595.117647  
20,2,2343.088235  
20,2,5144.962054  
20,2,1670.338068  
20,2,10832.934783  
20,2,2383.816327  
20,2,1910.097826  
20,2,1669.307692  
20,2,2081.970238

20,2,2653.494624  
20,2,5301.532051  
20,2,5057.567073  
20,2,2181.555556  
20,2,1517.607143  
20,2,2255.899510  
20,2,1937.928977  
20,2,1862.928571  
20,2,1636.882353  
20,2,1626.158333  
20,2,4161.980978  
20,2,2768.875000  
20,2,1541.933511  
20,2,2447.400000  
20,2,2299.170918  
20,2,1528.512097  
20,2,1689.675532  
20,2,6503.750000  
20,2,1806.016667  
20,2,2021.968023  
20,2,1855.491071  
20,2,1703.958333  
20,2,2916.011364  
20,2,10817.937500  
20,2,1701.145000  
20,2,2110.220000  
20,2,2064.625000  
20,2,2694.487500  
20,2,3839.980769  
20,2,1805.625000  
20,2,1650.290323  
20,2,3627.880137  
20,2,12312.469388  
20,2,1845.543750  
20,2,3305.187500  
20,2,1690.821429  
20,2,2837.750000  
20,2,2448.020000  
20,2,2241.734375  
20,2,2362.950000  
20,2,1840.289474  
20,2,2444.199468  
20,2,2559.320122  
20,2,2887.342105  
20,2,2733.793478  
20,2,4022.625000  
20,2,2432.000000  
20,2,3616.120000  
20,2,2372.274194  
20,2,2095.304054  
20,2,2053.375000  
20,2,2809.656250  
20,2,2760.616667  
20,2,1793.592391  
20,2,2558.880319  
20,2,2204.968750  
20,2,3009.400000  
20,2,2001.129902  
20,2,2427.093023  
20,2,1961.795455  
20,2,2641.142857  
20,2,2793.297872  
20,2,1929.243902  
20,2,1544.464286  
20,2,1513.671569  
20,2,1612.019231

20,2,2103.125000  
20,2,4845.165816  
20,2,2737.980263  
20,2,1628.478723  
20,2,1735.627451  
20,2,3657.500000  
20,2,1537.444444  
20,2,1737.500000  
20,2,3142.209375  
20,2,2216.125000  
20,2,2712.060000  
20,2,2894.159314  
20,2,1842.486979  
20,2,4052.934524  
20,2,1591.912500  
20,2,1536.761905  
20,2,2727.601852  
20,2,8265.844444  
20,2,4365.351351  
20,2,1675.134804  
20,2,1682.900000  
20,2,1575.600000  
20,2,1544.125000  
20,2,2090.833333  
20,2,2489.760417  
20,2,2320.826923  
20,2,1797.478261  
20,2,5224.740000  
20,2,3509.372093  
20,2,2512.034884  
20,2,2024.803191  
20,2,2990.255814  
20,2,3550.315789  
20,2,1572.541667  
20,2,1657.904523  
20,2,3391.099138  
20,2,2002.765957  
20,2,2348.927374  
20,2,2436.336735  
20,2,2371.069079  
20,2,2893.056122  
20,2,1810.527500  
20,2,1569.352941  
20,2,4067.309659  
20,2,1530.022727  
20,2,1545.659574  
20,2,2335.442308  
20,2,2133.634146  
20,2,4085.398649  
20,2,2004.086111  
20,2,2623.875000  
20,2,1521.460000  
20,2,3074.076923  
20,2,4903.455357  
20,2,2136.397059  
20,2,5384.778125  
20,2,2723.914894  
20,2,1655.798913  
20,2,3090.053571  
20,2,1606.700000  
20,2,2001.077128  
20,2,2147.683824  
20,2,2207.787234  
20,2,1686.978261  
20,2,1834.007813  
20,2,1794.927778

20,2,5567.221698  
20,2,2222.584906  
20,2,1555.040816  
20,2,1610.378205  
20,2,2600.970238  
20,2,1892.326531  
20,2,2674.000000  
20,2,1525.187500  
20,2,2089.192500  
20,2,1613.295455  
20,2,2389.484375  
20,2,2268.020833  
20,2,1838.805147  
20,2,1531.682692  
20,2,3288.333333  
20,2,1626.238764  
20,2,2259.375000  
20,2,2030.448276  
20,2,3371.165698  
20,2,1776.740000  
20,2,1976.073718  
20,2,1989.541667  
20,2,2117.528646  
20,2,3388.562500  
20,2,3013.229167  
20,2,2323.027174  
20,2,2549.769444  
20,2,2368.865385  
20,2,1504.353659  
20,2,2118.756579  
20,2,3430.425000  
20,2,2657.940476  
20,2,1693.367647  
20,2,3030.662791  
20,2,3106.095745  
20,2,5385.125000  
20,2,2551.659722  
20,2,2147.264151  
20,2,2597.911364  
20,2,3173.292614  
20,2,1508.965000  
20,2,2498.000000  
20,2,4059.350000  
20,2,1501.219512  
20,2,2212.512500  
20,2,1803.926471  
20,2,1643.136364  
20,2,1917.989796  
20,2,1660.593023  
20,2,2111.750000  
20,2,2180.125000  
20,2,1653.338235  
20,2,2260.187500  
20,2,3268.264706  
20,2,1631.787234  
20,2,15587.780000  
20,2,2854.787791  
20,2,2174.014706  
20,2,2397.873563  
20,2,1924.702381  
20,2,5342.881148  
20,2,2102.325581  
20,2,2733.845588  
20,2,3613.075000  
20,2,6062.718750  
20,2,1642.147059

20,2,2475.922872  
20,2,2543.236607  
20,2,3389.264423  
20,2,6050.084746  
20,2,1658.329787  
20,2,2016.634146  
20,2,2885.377451  
20,2,5177.816489  
20,2,4562.791667  
20,2,2388.572727  
20,2,2225.242857  
20,2,1655.786765  
20,2,3722.469388  
20,2,1802.029240  
20,2,4043.115196  
20,2,2342.804878  
20,2,1756.875000  
20,2,1801.436170  
20,2,1499.821429  
20,2,2184.493056  
20,2,1985.740000  
20,2,1911.346154  
20,2,2031.343750  
20,2,2558.652174  
20,2,4018.246324  
20,2,1634.986111  
20,2,3712.166667  
20,2,8026.021875  
20,2,1898.040000  
20,2,2714.581019  
20,2,2704.887640  
20,2,1866.180851  
20,2,4006.939189  
20,2,2642.492188  
20,2,1597.500000  
20,2,1543.900568  
20,2,3068.930921  
20,2,2599.843750  
20,2,2065.294643  
20,2,1598.100610  
20,2,1794.801829  
20,2,5376.300000  
20,2,3243.609375  
20,2,1801.810811  
20,2,1889.584821  
20,2,1736.482143  
20,2,2565.776042  
20,2,1897.315972  
20,2,1573.508333  
20,2,1997.023952  
20,2,3294.493421  
20,2,1625.127273  
20,2,2291.754717  
20,2,2483.022727  
20,2,2539.010417  
20,2,1799.800000  
20,2,5366.944444  
20,2,2265.000000  
20,2,1540.244444  
20,2,1687.796053  
20,2,2137.875000  
20,2,6561.081081  
20,2,1803.820122  
20,2,1743.935976  
20,2,1749.346939  
20,2,1551.762500

20,2,2882.044118  
20,2,2295.175000  
20,2,3582.958333  
20,2,2092.461364  
20,2,1759.215116  
20,2,1879.513158  
20,2,1745.826531  
20,2,2538.853659  
20,2,2097.151596  
20,2,2130.115385  
20,2,4064.357143  
20,2,2518.447115  
20,2,1787.904762  
20,2,2297.255682  
20,2,1602.600000  
20,2,2205.846154  
20,2,1567.732143  
20,2,2185.268519  
20,2,2483.512195  
20,2,1812.712209  
20,2,1806.925676  
20,2,1812.975490  
20,2,2068.939189  
20,2,5320.698276  
20,2,1531.021739  
20,2,2773.687500  
20,2,2227.878125  
20,2,4614.615854  
20,2,2595.178571  
20,2,1507.138889  
20,2,3432.664063  
20,2,1525.542500  
20,2,2869.103774  
20,2,3643.571429  
20,2,2911.614583  
20,2,1626.089844  
20,2,1601.366848  
20,2,1874.786585  
20,2,2878.000000  
20,2,1742.416667  
20,2,1767.962963  
20,2,2392.109756  
20,2,9007.635000  
20,2,1590.724138  
20,2,1926.760204  
20,2,2025.250000  
20,2,3798.331250  
20,2,1615.051136  
20,2,2335.815789  
20,2,2515.972826  
20,2,1558.227273  
20,2,1695.666667  
20,2,1855.664894  
20,2,3376.579268  
20,2,4725.375000  
20,2,4995.247951  
20,2,2007.800000  
20,2,1803.307432  
20,2,1760.965909  
20,2,1989.602273  
20,2,1840.828125  
20,2,3381.294118  
20,2,2909.630814  
20,2,2885.307292  
20,2,2070.155556  
20,2,2139.978723

20,2,1595.629310  
20,2,3650.272727  
20,2,1647.394444  
20,2,1500.987500  
20,2,3941.273810  
20,2,1707.316860  
20,2,1845.434524  
20,2,6085.926136  
20,2,4204.795455  
20,2,17970.696809  
20,2,2870.387500  
20,2,2483.635870  
20,2,1558.129167  
20,2,1866.446759  
20,2,1802.757813  
20,2,3348.066667  
20,2,2190.802326  
20,2,2513.961538  
20,2,1740.444444  
20,2,2968.236111  
20,2,2227.511574  
20,2,2365.570755  
20,2,3794.869792  
20,2,2429.640625  
20,2,12930.571809  
20,2,1884.801020  
20,2,2241.743056  
20,2,1829.505952  
20,2,1890.095588  
20,2,1672.750000  
20,2,1811.800000  
20,2,1945.303922  
20,2,1562.519444  
20,2,1902.861979  
20,2,1846.990385  
20,2,2499.096491  
20,2,3397.117647  
20,2,4006.210526  
20,2,2648.904255  
20,2,2076.147727  
20,2,3297.460938  
20,2,2078.875000  
20,2,2448.618644  
20,2,1954.122449  
20,2,1933.119565  
20,2,1827.910000  
20,2,3963.664216  
20,2,1834.382653  
20,2,2002.175000  
20,2,2461.625000  
20,2,2419.010204  
20,2,1570.118056  
20,2,1564.973684  
20,2,4043.227545  
20,2,1612.694175  
20,2,1914.803191  
20,2,2107.183962  
20,2,2434.803922  
20,2,2771.884146  
20,2,2183.882353  
20,2,1899.133333  
20,2,2274.235294  
20,2,2108.000000  
20,2,1834.255814  
20,2,1647.771739  
20,2,2123.370370

20,2,2086.980114  
20,2,2124.181818  
20,2,6418.666667  
20,2,1834.651163  
20,2,1518.250000  
20,2,2932.093750  
20,2,7114.125000  
20,2,2574.313953  
20,2,2923.333333  
20,2,4452.077206  
20,2,1832.804688  
20,2,3257.647727  
20,2,3133.576220  
20,2,1648.442708  
20,2,2123.455882  
20,2,14769.163043  
20,2,1909.791667  
20,2,2665.716981  
20,2,4151.005000  
20,2,2133.289634  
20,2,2862.277174  
20,2,2334.788462  
20,2,5796.545455  
20,2,3621.969388  
20,2,1753.092391  
20,2,2005.970000  
20,2,1750.750000  
20,2,2029.322115  
20,2,2348.312500  
20,2,3013.388889  
20,2,6201.581395  
20,2,1680.915094  
20,2,2082.332636  
20,2,1616.111111  
20,2,4539.117021  
20,2,2240.744898  
20,2,2651.790541  
20,2,1981.244898  
20,2,1904.737745  
20,2,1570.808511  
20,2,2646.372093  
20,2,1639.697500  
20,2,3458.923913  
20,2,1541.275862  
20,2,1825.541667  
20,2,1615.818182  
20,2,2046.850000  
20,2,1825.576923  
20,2,2197.323529  
20,2,1759.680851  
20,2,3458.734694  
20,2,1869.345000  
20,2,2482.405000  
20,2,2166.158333  
20,2,1998.122340  
20,2,1719.548913  
20,2,2424.389205  
20,2,2198.093750  
20,2,2038.551020  
20,2,1611.012195  
20,2,2899.790865  
20,2,2575.850000  
20,2,4527.695652  
20,2,3904.970588  
20,2,2108.812500  
20,2,2116.750000

20,2,1769.934783  
20,2,1589.875000  
20,2,1901.052632  
20,2,2189.755814  
20,2,2402.120000  
20,2,1589.367021  
20,2,2916.345000  
20,2,5039.656250  
20,2,2796.108796  
20,2,5412.352273  
20,2,1771.202830  
20,2,2415.109043  
20,2,2475.000000  
20,2,1572.380000  
20,2,1867.255435  
20,2,7510.203431  
20,2,5096.125000  
20,2,1594.013158  
20,2,3660.884615  
20,2,2247.786765  
20,2,1700.394231  
20,2,1932.109091  
20,2,3102.945122  
20,2,1506.062500  
20,2,2019.152778  
20,2,3889.187500  
20,2,1696.328947  
20,2,1805.000000  
20,2,1558.576923  
20,2,3088.260638  
20,2,1792.997642  
20,2,6392.875000  
20,2,3522.429487  
20,2,2135.302326  
20,2,1652.934783  
20,2,5362.142045  
20,2,1622.510870  
20,2,2465.131250  
20,2,1811.244318  
20,2,2532.018182  
20,2,2078.375000  
20,2,4819.663043  
20,2,5915.127660  
20,2,3612.925481  
20,2,2325.557143  
20,2,2741.505319  
20,2,3269.331731  
20,2,4924.511628  
20,2,3464.108333  
20,2,1952.550595  
20,2,1532.971354  
20,2,5676.320755  
20,2,1560.010638  
20,2,1815.336957  
20,2,2460.677966  
20,2,1941.125000  
20,2,2475.050000  
20,2,1646.017045  
20,2,2895.409091  
20,2,2863.220588  
20,2,3392.434375  
20,2,2296.908537  
20,2,4095.105114  
20,2,1888.018519  
20,2,2271.285377  
20,2,2294.348558

20,2,1523.082237  
20,2,1784.062500  
20,2,2369.009804  
20,2,2542.712719  
20,2,1613.078431  
20,2,3684.042969  
20,2,2188.175532  
20,2,1935.793478  
20,2,1544.025000  
20,2,2709.524510  
20,2,1783.409091  
20,2,6459.000000  
20,2,1564.750000  
20,2,1685.828125  
20,2,2417.607143  
20,2,2051.485294  
20,2,1847.810897  
20,2,2439.006944  
20,2,5797.500000  
20,2,1675.041667  
20,2,2002.328125  
20,2,2370.360119  
20,2,5094.698529  
20,2,1753.625000  
20,2,6224.993243  
20,2,1562.907609  
20,2,1550.391304  
20,2,2138.250000  
20,2,1990.408333  
20,2,6215.256098  
20,2,2014.412500  
20,2,7582.000000  
20,2,2015.739583  
20,2,1562.683673  
20,2,3573.756098  
20,2,2487.535714  
20,2,3504.021277  
20,2,1884.986111  
20,2,3806.000000  
20,2,1593.024306  
20,2,1518.679687  
20,2,1632.461538  
20,2,2253.618421  
20,2,1604.600000  
20,2,1578.214286  
20,2,1595.611702  
20,2,3268.750000  
20,2,5244.485714  
20,2,3014.587500  
20,2,2242.208333  
20,2,1742.305921  
20,2,1528.489362  
20,2,1578.297297  
20,2,3151.583333  
20,2,1683.975000  
20,2,2004.800000  
20,2,2878.938889  
20,2,1816.013089  
20,2,3002.650641  
20,2,1836.590625  
20,2,2624.218750  
20,2,3601.562500  
20,2,1966.191964  
20,2,2481.173913  
20,2,2371.517857  
20,2,1972.741379

20,2,1982.650000  
20,2,1596.833333  
20,2,1640.375000  
20,2,1826.276596  
20,2,1529.635135  
20,2,4160.433824  
20,2,2110.000000  
20,2,1625.392857  
20,2,1928.493056  
20,2,1633.961207  
20,2,4238.562500  
20,2,2848.973214  
20,2,2391.270000  
20,2,1660.473684  
20,2,2250.833333  
20,2,1747.491071  
20,2,2544.400000  
20,2,2140.254545  
20,2,1712.053191  
20,2,1846.931818  
20,2,1799.657895  
20,2,2109.470000  
20,2,3066.666667  
20,2,2187.400000  
20,2,1707.661836  
20,2,2186.250000  
20,2,1555.786585  
20,2,1704.493421  
20,2,1931.642857  
20,2,1640.359375  
20,2,3004.040816  
20,2,1711.461806  
20,2,2887.393939  
20,2,2575.087209  
20,2,1828.514706  
20,2,2128.901163  
20,2,1845.325472  
20,2,1511.617021  
20,2,2365.264706  
20,2,3803.080189  
20,2,5012.790179  
20,2,5335.997340  
20,2,1627.000000  
20,2,1567.809859  
20,2,2212.630000  
20,2,1617.509615  
20,2,2159.758621  
20,2,1620.631250  
20,2,1691.636111  
20,2,2915.992500  
20,2,1653.750000  
20,2,2129.598837  
20,2,1758.932692  
20,2,2380.735294  
20,2,3169.100000  
20,2,4587.769231  
20,2,1701.952381  
20,2,1739.743243  
20,2,2547.512821  
20,2,1636.585714  
20,2,1518.959302  
20,2,2190.844512  
20,2,3097.856383  
20,2,3478.637255  
20,2,3014.495968  
20,2,1586.481250

20,2,2681.425150  
20,2,2630.945161  
20,2,3682.500000  
20,2,2002.583333  
20,2,2361.397959  
20,2,1782.183824  
20,2,8132.568182  
20,2,1666.673611  
20,2,3138.513514  
20,2,6763.668367  
20,2,1533.381579  
20,2,1661.476190  
20,2,5028.828125  
20,2,3020.333333  
20,2,1607.917763  
20,2,1938.655405  
20,2,1630.991477  
20,2,1855.566176  
20,2,2689.666667  
20,2,2367.125000  
20,2,2603.470588  
20,2,2596.153846  
20,2,2538.963235  
20,2,2066.414062  
20,2,3759.200000  
20,2,2839.241228  
20,2,1746.884868  
20,2,1689.337500  
20,2,2500.173611  
20,2,2918.758333  
20,2,2304.803922  
20,2,15914.750000  
20,2,2357.408163  
20,2,1588.018750  
20,2,3647.739394  
20,2,1549.500000  
20,2,2008.058511  
20,2,5953.412281  
20,2,1826.593750  
20,2,5000.506944  
20,2,1754.361702  
20,2,1956.823171  
20,2,2443.144231  
20,2,11141.662500  
20,2,4615.312500  
20,2,1856.051339  
20,2,1996.805851  
20,2,1916.857143  
20,2,2678.509615  
20,2,1565.454545  
20,2,1687.000000  
20,2,1559.086538  
20,2,3428.031250  
20,2,1781.295732  
20,2,2220.025000  
20,2,1779.870000  
20,2,2329.956250  
20,2,1534.333333  
20,2,1520.911111  
20,2,2023.163265  
20,2,1762.712500  
20,2,1945.285714  
20,2,1865.062500  
20,2,2672.138587  
20,2,1855.102941  
20,2,2308.312500

20,2,2336.391304  
20,2,2377.518519  
20,2,2335.555556  
20,2,1779.310096  
20,2,1944.625000  
20,2,1541.659574  
20,2,2419.036765  
20,2,2295.233696  
20,2,2244.078431  
20,2,2273.728659  
20,2,1530.905488  
20,2,2276.461538  
20,2,1514.653061  
20,2,2489.802500  
20,2,2137.528846  
20,2,1827.053571  
20,2,3054.908333  
20,2,1792.578947  
20,2,3238.687500  
20,2,3394.699074  
20,2,2704.122449  
20,2,1577.715909  
20,2,1536.000000  
20,2,2272.320122  
20,2,1809.041667  
20,2,1757.000000  
20,2,4058.759259  
20,2,2715.068396  
20,2,2162.714286  
20,2,2095.441810  
20,2,1964.875000  
20,2,1612.671875  
20,2,2683.901042  
20,2,3502.506579  
20,2,2717.634615  
20,2,1956.547170  
20,2,1642.750000  
20,2,2984.782609  
20,2,2052.074074  
20,2,1696.354167  
20,2,1928.398437  
20,2,6293.379310  
20,2,2889.530612  
20,2,1729.033333  
20,2,3153.799479  
20,2,4158.967593  
20,2,2991.551020  
20,2,3463.909574  
20,2,1833.560811  
20,2,2196.611979  
20,2,2525.763158  
20,2,1533.269231  
20,2,1623.825000  
20,2,5017.187500  
20,2,2083.435897  
20,2,2262.034884  
20,2,1978.570513  
20,2,2583.042857  
20,2,1667.601744  
20,2,1948.370000  
20,2,1908.666667  
20,2,1799.012500  
20,2,1893.489796  
20,2,2474.794643  
20,2,3077.570652  
20,2,1554.792614

20,2,2055.108108  
20,2,3070.423469  
20,2,4701.168478  
20,2,3611.937500  
20,2,1849.704268  
20,2,6122.660156  
20,2,1605.488372  
20,2,3079.500000  
20,2,1980.015244  
20,2,2404.541667  
20,2,3401.036585  
20,2,10337.019231  
20,2,1674.875000  
20,2,1777.559211  
20,2,1679.090909  
20,2,1677.028846  
20,2,1651.638889  
20,2,1968.785256  
20,2,1976.414474  
20,2,1656.958333  
20,2,4831.397059  
20,2,2355.397727  
20,2,10742.500000  
20,2,1897.370000  
20,2,1558.945455  
20,2,1750.500000  
20,2,1793.875000  
20,2,2885.135135  
20,2,7408.706522  
20,2,3582.640625  
20,2,1822.703125  
20,2,2156.000000  
20,2,2116.148438  
20,2,2360.658088  
20,2,2001.218750  
20,2,8811.613636  
20,2,1879.850877  
20,2,2971.062500  
20,2,1789.666667  
20,2,2297.187500  
20,2,2781.207547  
20,2,2343.676471  
20,2,1513.937500  
20,2,1565.780000  
20,2,1717.459677  
20,2,2636.400000  
20,2,3896.518987  
20,2,2446.087500  
20,2,2691.718085  
20,2,1622.544118  
20,2,3089.407609  
20,2,2611.297414  
20,2,2356.038462  
20,2,1548.072917  
20,2,2460.495283  
20,2,1644.333333  
20,2,10272.004902  
20,2,2886.848958  
20,2,1529.643293  
20,2,4703.509146  
20,2,2145.982143  
20,2,2034.517157  
20,2,4557.025641  
20,2,4151.129808  
20,2,1613.895000  
20,2,1577.891304

20,2,2541.714286  
20,2,1843.625000  
20,2,2609.877660  
20,2,2430.310000  
20,2,2782.543367  
20,2,2485.459239  
20,2,2641.706140  
20,2,1802.116071  
20,2,2206.145161  
20,2,2057.893750  
20,2,4683.741935  
20,2,1745.223214  
20,2,5518.029412  
20,2,3989.906250  
20,2,9196.750000  
20,2,1657.777027  
20,2,1796.461957  
20,2,1848.108333  
20,2,3180.516447  
20,2,1723.881250  
20,2,2429.102941  
20,2,1565.444079  
20,2,1528.104167  
20,2,2857.542683  
20,2,2504.446875  
20,2,2437.326389  
20,2,5463.890957  
20,2,2370.046053  
20,2,2076.016129  
20,2,3436.617925  
20,2,1915.884615  
20,2,1842.172414  
20,2,1705.915000  
20,2,2079.187500  
20,2,1722.805921  
20,2,2092.086538  
20,2,1526.875000  
20,2,4175.292683  
20,2,2077.695122  
20,2,1737.500000  
20,2,6235.375000  
20,2,2470.691489  
20,2,1788.843750  
20,2,19841.281250  
20,2,2026.250000  
20,2,10521.052632  
20,2,2517.897959  
20,2,2876.027778  
20,2,2693.000000  
20,2,8552.292683  
20,2,1584.384058  
20,2,1811.045455  
20,2,1562.708333  
20,2,1915.002358  
20,2,7984.261905  
20,2,2064.835106  
20,2,1861.345588  
20,2,1630.734375  
20,2,1536.235294  
20,2,2229.704082  
20,2,1622.034375  
20,2,2257.445000  
20,2,1947.500000  
20,2,2281.319149  
20,2,2142.166667  
20,2,1869.514286

20,2,1927.757353  
20,2,3184.609091  
20,2,1524.294118  
20,2,1969.511628  
20,2,14265.817073  
20,2,3057.187500  
20,2,1615.846154  
20,2,1726.346154  
20,2,5818.648585  
20,2,1964.000000  
20,2,1858.002551  
20,2,3251.010417  
20,2,1667.633333  
20,2,1867.395833  
20,2,1499.524390  
20,2,1723.875000  
20,2,2428.762195  
20,2,3004.259868  
20,2,3606.007979  
20,2,2225.100000  
20,2,1886.207386  
20,2,1731.692308  
20,2,2500.578125  
20,2,1707.537037  
20,2,6094.300000  
20,2,3662.761905  
20,2,1620.062500  
20,2,1913.750000  
20,2,1691.333333  
20,2,2877.444444  
20,2,1999.982143  
20,2,1847.942073  
20,2,3178.730769  
20,2,11448.277778  
20,2,1607.134146  
20,2,1712.000000  
20,2,5202.312500  
20,2,2006.884868  
20,2,1687.100000  
20,2,3325.692308  
20,2,2640.610577  
20,2,3008.639535  
20,2,2340.294118  
20,2,1929.837838  
20,2,1610.048913  
20,2,2297.331250  
20,2,2678.839286  
20,2,1710.602273  
20,2,1670.825581  
20,2,2886.209184  
20,2,1515.707317  
20,2,2121.275000  
20,2,2106.787500  
20,2,3139.360000  
20,2,3767.925000  
20,2,1766.214674  
20,2,2284.115385  
20,2,1537.604651  
20,2,2940.507653  
20,2,2127.089674  
20,2,3741.080645  
20,2,2622.326923  
20,2,5909.073370  
20,2,2547.443750  
20,2,2172.042614  
20,2,8002.803571

20,2,2497.007075  
20,2,1835.871711  
20,2,5407.620000  
20,2,4709.418367  
20,2,2326.649306  
20,2,4080.861111  
20,2,2145.690000  
20,2,4926.152778  
20,2,4144.800000  
20,2,1649.667683  
20,2,2040.245968  
20,2,2303.258065  
20,2,2242.000000  
20,2,3336.842105  
20,2,2046.976562  
20,2,1765.625000  
20,2,1757.203947  
20,2,3758.463816  
20,2,2589.566038  
20,2,1985.066860  
20,2,2679.343750  
20,2,4203.525000  
20,2,3272.968750  
20,2,2337.125000  
20,2,2924.450000  
20,2,2095.976744  
20,2,1561.255924  
20,2,1925.237500  
20,2,2905.750000  
20,2,1552.714286  
20,2,3892.795000  
20,2,3501.962500  
20,2,5062.125000  
20,2,2750.000000  
20,2,5477.812500  
20,2,1704.979592  
20,2,1857.661111  
20,2,4196.042683  
20,2,2071.355263  
20,2,1659.420455  
20,2,2406.740741  
20,2,3238.083333  
20,2,1770.828125  
20,2,2659.955128  
20,2,3098.187500  
20,2,1968.755000  
20,2,2033.684211  
20,2,2290.718750  
20,2,2328.645833  
20,2,1741.404762  
20,2,1559.851562  
20,2,1532.538462  
20,2,2290.523585  
20,2,1881.700000  
20,2,3102.556373  
20,2,2190.680851  
20,2,1573.975446  
20,2,3232.694079  
20,2,1957.139151  
20,2,1837.031250  
20,2,2304.922222  
20,2,1870.439024  
20,2,1704.371429  
20,2,1796.880952  
20,2,1713.295918  
20,2,1822.160714

20,2,1504.973958  
20,2,5061.985849  
20,2,2176.642857  
20,2,3772.540000  
20,2,2149.699519  
20,2,1663.216667  
20,2,1646.062500  
20,2,2466.750000  
20,2,2948.669118  
20,2,2474.875000  
20,2,2118.079545  
20,2,1545.000000  
20,2,1694.477273  
20,2,4866.889286  
20,2,2140.977564  
20,2,2329.305556  
20,2,2032.166667  
20,2,2561.420213  
20,2,1733.772727  
20,2,1720.963235  
20,2,1816.317308  
20,2,1870.119318  
20,2,1848.912500  
20,2,2107.893617  
20,2,2950.714844  
20,2,1929.833333  
20,2,1622.562500  
20,2,3457.166667  
20,2,2013.980392  
20,2,1547.955556  
20,2,1680.859375  
20,2,1501.982143  
20,2,1781.038462  
20,2,2074.450980  
20,2,1588.939815  
20,2,1614.907609  
20,2,1522.640625  
20,2,3159.269608  
20,2,2781.892045  
20,2,1718.489362  
20,2,2788.431250  
20,2,3722.601974  
20,2,2258.397059  
20,2,1656.437500  
20,2,2297.320000  
20,2,2461.719828  
20,2,2344.849138  
20,2,2322.851852  
20,2,2002.368902  
20,2,2550.346154  
20,2,1780.958333  
20,2,1642.392857  
20,2,5200.100000  
20,2,1737.250000  
20,2,2475.840686  
20,2,14756.338710  
20,2,3758.928571  
20,2,1615.756757  
20,2,2513.503289  
20,2,4554.288043  
20,2,2482.619565  
20,2,4891.530093  
20,2,1808.200000  
20,2,4440.586735  
20,2,2473.674242  
20,2,3094.521739

20,2,2363.972973  
20,2,1500.985294  
20,2,1953.128205  
20,2,3227.078652  
20,2,1981.369318  
20,2,1599.365385  
20,2,1504.000000  
20,2,2188.137500  
20,2,2187.577381  
20,2,1707.791667  
20,2,2399.962500  
20,2,2502.000000  
20,2,3464.465909  
20,2,1689.457237  
20,2,5903.383721  
20,2,1543.439024  
20,2,1901.724432  
20,2,1593.134615  
20,2,1688.412791  
20,2,1513.875000  
20,2,2654.227273  
20,2,2298.195652  
20,2,3092.000000  
20,2,3076.788265  
20,2,5813.574468  
20,2,7751.540698  
20,2,5695.227041  
20,2,1873.226415  
20,2,1651.775641  
20,2,2568.250000  
20,2,3805.000000  
20,2,1842.785714  
20,2,2902.333333  
20,2,1515.032609  
20,2,1536.487805  
20,2,1594.691176  
20,2,3031.757813  
20,2,2263.081081  
20,2,2531.051282  
20,2,2448.554245  
20,2,1897.412879  
20,2,2359.465000  
20,2,2098.473958  
20,2,2012.227273  
20,2,1527.143617  
20,2,5732.227778  
20,2,1810.073171  
20,2,2629.410714  
20,2,4595.586735  
20,2,2368.284091  
20,2,2021.150000  
20,2,1553.842105  
20,2,1653.141667  
20,2,1510.454268  
20,2,1561.400000  
20,2,1626.378125  
20,2,2103.215909  
20,2,2072.145833  
20,2,2356.412500  
20,2,2213.239583  
20,2,1503.035714  
20,2,2226.000000  
20,2,1605.957447  
20,2,3722.260776  
20,2,2319.012887  
20,2,1521.000000

20,2,2764.107143  
20,2,2105.250000  
20,2,1560.504237  
20,2,2739.264706  
20,2,1861.549342  
20,2,2378.846939  
20,2,1670.818878  
20,2,2093.800000  
20,2,1763.968750  
20,2,2548.451389  
20,2,1889.375000  
20,2,2433.312500  
20,2,2454.000000  
20,2,3455.320455  
20,2,5354.250000  
20,2,1987.035714  
20,2,1502.730769  
20,2,2275.662234  
20,2,1726.731250  
20,2,3004.090625  
20,2,2493.267857  
20,2,3889.271277  
20,2,2706.414894  
20,2,3686.076531  
20,2,1536.976190  
20,2,1715.447115  
20,2,1594.179825  
20,2,2748.511628  
20,2,1534.153846  
20,2,1742.670455  
20,2,2674.806818  
20,2,2461.750000  
20,2,1624.200000  
20,2,4488.127907  
20,2,3644.781977  
20,2,2081.615625  
20,2,1884.595745  
20,2,2200.360294  
20,2,1802.133333  
20,2,3012.960526  
20,2,1968.957317  
20,2,3486.152778  
20,2,1595.547619  
20,2,3066.973684  
20,2,2674.187500  
20,2,1640.770161  
20,2,2384.961538  
20,2,1668.260417  
20,2,1695.835938  
20,2,4971.454545  
20,2,1891.750000  
20,2,2408.687500  
20,2,1784.701220  
20,2,3282.671429  
20,2,1995.882653  
20,2,1574.707317  
20,2,1824.039062  
20,2,1718.377717  
20,2,2728.777778  
20,2,1541.352941  
20,2,1687.868421  
20,2,2510.571875  
20,2,1635.000000  
20,2,1918.041667  
20,2,4601.526786  
20,2,1891.822917

20,2,1703.325000  
20,2,2591.819444  
20,2,2654.577586  
20,2,1638.848958  
20,2,2074.958333  
20,2,4122.896552  
20,2,4755.158537  
20,2,1553.291667  
20,2,7058.992857  
20,2,1584.042553  
20,2,1512.147059  
20,2,2097.262755  
20,2,1655.708333  
20,2,1505.635762  
20,2,2063.262195  
20,2,2892.971429  
20,2,1530.386364  
20,2,5146.221154  
20,2,1941.017857  
20,2,3021.666667  
20,2,1949.194767  
20,2,5463.750000  
20,2,1945.587500  
20,2,1854.515957  
20,2,1546.656250  
20,2,3529.039216  
20,2,1823.632653  
20,2,1589.200000  
20,2,2382.489583  
20,2,2009.848837  
20,2,1804.282895  
20,2,3443.280488  
20,2,1620.588889  
20,2,2658.846154  
20,2,1503.047872  
20,2,1584.617188  
20,2,2139.766304  
20,2,2344.723958  
20,2,2024.250000  
20,2,2576.446429  
20,2,1506.023026  
20,2,2163.844595  
20,2,1559.279412  
20,2,2869.566176  
20,2,2437.045455  
20,2,3860.472500  
20,2,1885.291667  
20,2,2219.427083  
20,2,2557.902778  
20,2,3961.885417  
20,2,1634.340909  
20,2,1592.434375  
20,2,4072.416667  
20,2,3821.400000  
20,2,1796.900000  
20,2,1514.950000  
20,2,1688.954787  
20,2,1545.871324  
20,2,2308.838942  
20,2,3655.478723  
20,2,2344.820122  
20,2,1588.187500  
20,2,1530.083333  
20,2,1720.205729  
20,2,2002.478261  
20,2,1642.551020

20,2,1857.500000  
20,2,3475.181818  
20,2,1521.575000  
20,2,1958.188830  
20,2,4003.000000  
20,2,1834.362500  
20,2,1537.744186  
20,2,1658.261161  
20,2,2986.966292  
20,2,2214.220000  
20,2,2009.859375  
20,2,3191.309524  
20,2,1883.707317  
20,2,2779.230769  
20,2,1667.500000  
20,2,1566.083333  
20,2,2516.479167  
20,2,2016.681548  
20,2,1602.174342  
20,2,2543.825000  
20,2,2011.377778  
20,2,1672.352564  
20,2,1950.330189  
20,2,2390.150000  
20,2,2689.553191  
20,2,2860.010870  
20,2,1919.435811  
20,2,2412.740741  
20,2,2382.560811  
20,2,1960.166667  
20,2,1645.513158  
20,2,7619.187500  
20,2,8031.523256  
20,2,5040.000000  
20,2,1771.607143  
20,2,2673.517857  
20,2,2441.928922  
20,2,1752.148936  
20,2,2086.500000  
20,2,2095.348684  
20,2,1791.913580  
20,2,1622.822917  
20,2,3463.766667  
20,2,12366.527778  
20,2,1610.208333  
20,2,1976.090909  
20,2,1862.211957  
20,2,1946.419872  
20,2,1651.488889  
20,2,1678.773026  
20,2,1662.350000  
20,2,2121.021429  
20,2,1918.037791  
20,2,1864.625000  
20,2,1672.274194  
20,2,1863.687500  
20,2,1821.704268  
20,2,2461.593750  
20,2,1617.452703  
20,2,1623.569444  
20,2,4302.075000  
20,2,1550.937500  
20,2,1684.930921  
20,2,3005.664773  
20,2,2016.348404  
20,2,1754.914286

20,2,1558.375000  
20,2,3228.054545  
20,2,1677.750000  
20,2,2672.989796  
20,2,1812.900568  
20,2,1627.946429  
20,2,3313.492021  
20,2,1768.906250  
20,2,1686.690789  
20,2,3067.367647  
20,2,1897.888889  
20,2,3343.058824  
20,2,2445.240000  
20,2,2144.617021  
20,2,2290.941327  
20,2,1759.263889  
20,2,1607.530488  
20,2,3637.039216  
20,2,2621.750000  
20,2,3457.875000  
20,2,2357.208333  
20,2,1613.994186  
20,2,1556.330000  
20,2,2015.281250  
20,2,1767.960106  
20,2,3086.202500  
20,2,3138.364796  
20,2,2088.141026  
20,2,4044.531915  
20,2,2450.978723  
20,2,3671.712500  
20,2,1612.010417  
20,2,11765.367347  
20,2,1570.666667  
20,2,2021.946429  
20,2,2636.677083  
20,2,7178.666667  
20,2,2401.823529  
20,2,1975.734694  
20,2,2040.226351  
20,2,2603.947917  
20,2,3015.257653  
20,2,2427.000000  
20,2,3045.500000  
20,2,3765.663043  
20,2,1947.227273  
20,2,12726.510135  
20,2,1695.730769  
20,2,1511.125000  
20,2,1538.188889  
20,2,8262.526316  
20,2,1602.531250  
20,2,1832.414634  
20,2,1581.890625  
20,2,2755.750000  
20,2,1921.143750  
20,2,2139.753049  
20,2,1696.645833  
20,2,2480.906736  
20,2,1582.500000  
20,2,3470.917763  
20,2,2312.601351  
20,2,1644.789773  
20,2,1657.823980  
20,2,1544.625000  
20,2,5779.818182

20,2,1727.784091  
20,2,1708.937500  
20,2,6678.403846  
20,2,1585.791667  
20,2,2224.070122  
20,2,4732.034722  
20,2,5072.055851  
20,2,1635.190909  
20,2,1881.032609  
20,2,1865.544643  
20,2,1649.857558  
20,2,3256.675439  
20,2,2751.256250  
20,2,2284.500000  
20,2,2723.350543  
20,2,1519.530000  
20,2,2551.042553  
20,2,1537.750000  
20,2,2058.125000  
20,2,3218.921875  
20,2,2164.625000  
20,2,1843.398438  
20,2,1733.625000  
20,2,2234.140909  
20,2,1732.855469  
20,2,2188.500000  
20,2,5901.528571  
20,2,2728.957237  
20,2,1855.055556  
20,2,2398.609756  
20,2,2805.600000  
20,2,1935.133333  
20,2,5488.210526  
20,2,4965.968750  
20,2,4335.125000  
20,2,2910.988636  
20,2,1516.765957  
20,2,2441.817797  
20,2,1977.375000  
20,2,11596.266304  
20,2,2807.051471  
20,2,3789.500000  
20,2,1924.693182  
20,2,1749.063636  
20,2,5464.525000  
20,2,2376.484375  
20,2,1503.914216  
20,2,1687.488095  
20,2,1673.446023  
20,2,1616.358491  
20,2,2718.507353  
20,2,1972.455729  
20,2,1923.610465  
20,2,1878.125000  
20,2,4337.815476  
20,2,1695.287234  
20,2,2403.222826  
20,2,4877.170455  
20,2,2355.772727  
20,2,2247.534884  
20,2,2327.428571  
20,2,1501.360577  
20,2,2934.900000  
20,2,3051.230000  
20,2,1754.232843  
20,2,1702.323529

20,2,1600.181122  
20,2,2685.776163  
20,2,1858.522436  
20,2,2397.414894  
20,2,1563.627907  
20,2,2400.608696  
20,2,1672.588942  
20,2,3106.323529  
20,2,4616.044503  
20,2,5079.485577  
20,2,1841.937500  
20,2,3350.355263  
20,2,4675.104167  
20,2,1968.208333  
20,2,9134.156250  
20,2,2409.300000  
20,2,1499.914894  
20,2,2100.010135  
20,2,1983.145695  
20,2,1975.153846  
20,2,1567.055556  
20,2,1746.755556  
20,2,1652.725610  
20,2,2498.647059  
20,2,3657.487179  
20,2,6674.263158  
20,2,2288.793103  
20,2,3764.244505  
20,2,2426.065217  
20,2,2970.627660  
20,2,3096.172170  
20,2,2670.901786  
20,2,2153.250000  
20,2,1665.845745  
20,2,2835.512195  
20,2,2593.651786  
20,2,4146.521875  
20,2,2253.480263  
20,2,1504.213415  
20,2,1565.690217  
20,2,1590.437500  
20,2,4139.023026  
20,2,1751.537791  
20,2,3369.875000  
20,2,1769.960937  
20,2,2638.986111  
20,2,1640.705556  
20,2,2335.590000  
20,2,2132.315476  
20,2,3813.044444  
20,2,1653.500000  
20,2,3502.190476  
20,2,1913.897059  
20,2,1978.867925  
20,2,2103.216981  
20,2,1943.125000  
20,2,2138.937500  
20,2,2043.415698  
20,2,4152.821429  
20,2,2763.701220  
20,2,1983.812500  
20,2,1634.293103  
20,2,2238.671875  
20,2,1614.836538  
20,2,1617.793367  
20,2,2028.493590

20,2,3377.289062  
20,2,2894.446429  
20,2,1563.000000  
20,2,8015.025641  
20,2,2078.744565  
20,2,1866.090426  
20,2,1795.437500  
20,2,2162.716346  
20,2,1881.000000  
20,2,2749.359043  
20,2,1902.602941  
20,2,1565.116279  
20,2,1879.260204  
20,2,2169.109375  
20,2,1622.921875  
20,2,2261.892857  
20,2,1573.052500  
20,2,2517.606383  
20,2,1729.494872  
20,2,1741.610465  
20,2,2627.137255  
20,2,4680.455556  
20,2,3230.500000  
20,2,1761.377717  
20,2,2027.283333  
20,2,1944.441860  
20,2,2086.562500  
20,2,1962.515244  
20,2,1608.000000  
20,2,1859.322727  
20,2,2277.421053  
20,2,2079.360000  
20,2,1501.354167  
20,2,1637.312500  
20,2,1683.188889  
20,2,2395.333333  
20,2,2189.333333  
20,2,1915.785714  
20,2,2910.818182  
20,2,2042.464286  
20,2,1703.583333  
20,2,3791.627907  
20,2,1573.728814  
20,2,3379.699324  
20,2,3640.607143  
20,2,1960.793478  
20,2,1708.200000  
20,2,3592.000000  
20,2,2026.176724  
20,2,3312.387255  
20,2,1851.705128  
21,1,17880.975610  
21,1,2950.285714  
21,1,1499.243243  
21,1,1909.780488  
21,1,2380.125000  
21,1,19579.574468  
21,1,2033.722826  
21,1,5623.536585  
21,1,1995.426136  
21,1,16399.872685  
21,1,7168.923913  
21,1,2084.861111  
21,1,4162.078947  
21,1,1733.357143  
21,1,10183.736413

21,1,1552.420732  
21,1,17309.000000  
21,1,2387.172297  
21,1,3697.253289  
21,1,3759.078947  
21,1,2303.900000  
21,1,4605.167683  
21,1,4556.403846  
21,1,2896.526316  
21,1,7594.236486  
21,1,2037.929348  
21,1,14196.731707  
21,1,4088.813953  
21,1,2542.959559  
21,1,2890.718750  
21,1,12644.000000  
21,1,2107.705882  
21,1,1723.333333  
21,1,1724.791667  
21,1,2616.267442  
21,1,1623.005435  
21,1,1551.664474  
21,1,4258.472656  
21,1,17000.185185  
21,1,4170.923077  
21,1,1872.801136  
21,1,6283.060714  
21,1,2947.677885  
21,1,3543.310811  
21,1,2315.273438  
21,1,2206.810976  
21,1,2279.685000  
21,1,4313.632812  
21,1,11154.085366  
21,1,1577.147727  
21,1,1506.095238  
21,1,3983.303030  
21,1,14174.186047  
21,1,11557.161290  
21,1,2450.421196  
21,1,4857.754032  
21,1,1836.097826  
21,1,3396.242647  
21,1,8854.625000  
21,1,3978.500000  
21,1,1874.250000  
21,1,3271.651515  
21,1,4877.769231  
21,1,14290.424242  
21,1,3364.512195  
21,1,3708.216912  
21,1,7700.435484  
21,1,1884.100000  
21,1,1527.089744  
21,1,2934.653846  
21,1,3859.055556  
21,1,6363.653846  
21,1,2385.571429  
21,1,2446.403846  
21,1,10813.875000  
21,1,3386.318182  
21,1,7785.558824  
21,1,6417.986486  
21,1,16398.602273  
21,1,3695.569853  
21,1,2044.183824

21,1,2137.230769  
21,1,1950.113971  
21,1,1522.242424  
21,1,1749.538462  
21,1,7464.286585  
21,1,4946.381250  
21,1,2073.716463  
21,1,16784.900000  
21,1,3348.250000  
21,1,1702.554688  
21,1,6589.937500  
21,1,4795.071429  
21,1,2873.182432  
21,1,2094.114286  
21,1,3728.000000  
21,1,7241.775735  
21,1,8425.319444  
21,1,18663.256944  
21,1,4031.000000  
21,1,1763.226190  
21,1,5659.809211  
21,1,1619.150000  
21,1,3096.037037  
21,1,3103.072368  
21,1,1657.762500  
21,1,2019.091146  
21,1,8941.190789  
21,1,2007.774194  
21,1,13988.976190  
21,1,5596.803922  
21,1,5410.444444  
21,1,1836.678977  
21,1,2944.427632  
21,1,1927.278125  
21,1,4640.026042  
21,1,2257.714286  
21,1,14504.523438  
21,1,4298.728571  
21,1,16951.321429  
21,1,2469.923780  
21,1,18451.556250  
21,1,2450.381579  
21,1,3805.279412  
21,1,3273.136364  
21,1,6368.040541  
21,1,8070.646552  
21,1,7550.610465  
21,1,6217.678571  
21,1,14622.111111  
21,1,4888.500000  
21,1,1676.840909  
21,1,10506.606481  
21,1,2166.110577  
21,1,8761.266667  
21,1,10193.250000  
21,1,3511.977564  
21,1,2760.372449  
21,1,18307.465116  
21,1,2237.000000  
21,1,1642.329268  
21,1,2552.738372  
21,1,3266.875000  
21,1,2557.363636  
21,1,1879.768382  
21,1,14274.863636  
21,1,3771.250000

21,1,2884.951923  
21,1,2993.090426  
21,1,8425.163522  
21,1,7077.797794  
21,1,14227.421053  
21,1,9280.187500  
21,1,2588.090909  
21,1,15167.105000  
21,1,10756.921875  
21,1,6575.806452  
21,1,1512.889205  
21,1,1756.583333  
21,1,3102.291667  
21,1,8198.318548  
21,1,2248.040441  
21,1,2608.785714  
21,1,13463.301136  
21,1,2075.750000  
21,1,7325.244681  
21,1,1847.852941  
21,1,4408.744681  
21,1,2119.380682  
21,1,4870.766304  
21,1,6355.536765  
21,1,3665.286458  
21,1,12297.270000  
21,1,6967.637821  
21,1,6676.878289  
21,1,5484.486486  
21,1,3169.463415  
21,1,2383.065217  
21,1,2324.812500  
21,1,2016.454545  
21,1,2927.477273  
21,1,9319.886364  
21,1,4472.115625  
21,1,11725.897059  
21,1,2154.035714  
21,1,19564.189189  
21,1,1885.183333  
21,1,2330.181818  
21,1,2761.383929  
21,1,17187.800000  
21,1,2385.445000  
21,1,3422.368590  
21,1,4438.531250  
21,1,2921.714286  
21,1,5127.996429  
21,1,12738.000000  
21,1,3303.545455  
21,1,2616.130952  
21,1,4030.534091  
21,1,8994.770833  
21,1,6765.266667  
21,1,6200.765625  
21,1,6858.915761  
21,1,4639.369048  
21,1,2107.363971  
21,1,4702.125000  
21,1,3983.459459  
21,1,3905.347826  
21,1,1649.687500  
21,1,3953.690789  
21,1,5500.656250  
21,1,4527.704545  
21,1,15733.312500

21,1,1976.000000  
21,1,1720.570000  
21,1,7416.725543  
21,1,1516.125000  
21,1,2250.360000  
21,1,8011.846154  
21,1,15858.684322  
21,1,4409.039474  
21,1,9989.500000  
21,1,2067.061170  
21,1,1503.358696  
21,1,6561.838235  
21,1,3239.585366  
21,1,3746.441667  
21,1,1587.068182  
21,1,8025.666667  
21,1,2286.300000  
21,1,4913.500000  
21,1,2150.052632  
21,1,5081.500000  
21,1,7866.882353  
21,1,17676.139073  
21,1,3105.673077  
21,1,1871.011628  
21,1,6999.696133  
21,1,7811.888636  
21,1,2169.945122  
21,1,11735.857143  
21,1,3545.608108  
21,1,9091.132353  
21,1,9462.773026  
21,1,4746.456522  
21,1,14197.147059  
21,1,4318.342857  
21,1,2345.638889  
21,1,16505.107143  
21,1,1785.791667  
21,1,1659.436782  
21,1,1773.655914  
21,1,2360.875000  
21,1,2494.000000  
21,1,5658.733553  
21,1,1566.832143  
21,1,2383.957386  
21,1,1691.761364  
21,1,4975.486842  
21,1,2751.937500  
21,1,9937.937500  
21,1,4442.458333  
21,1,2394.170455  
21,1,1912.169872  
21,1,10380.111702  
21,1,2642.208333  
21,1,3601.636364  
21,1,2268.135135  
21,1,1686.941176  
21,1,13164.138587  
21,1,10923.975610  
21,1,2281.411765  
21,1,3162.222656  
21,1,2215.904070  
21,1,3348.127551  
21,1,2001.065909  
21,1,3534.500000  
21,1,18109.071970  
21,1,7187.088710

21,1,1526.604651  
21,1,3405.732143  
21,1,14478.846154  
21,1,3156.777778  
21,1,2053.083333  
21,1,6971.375000  
21,1,1665.648936  
21,1,4466.673913  
21,1,4317.628378  
21,1,6750.632353  
21,1,1594.628205  
21,1,1822.375000  
21,1,4673.315217  
21,1,4700.446429  
21,1,1516.118421  
21,1,4274.388889  
21,1,2380.676136  
21,1,2992.529605  
21,1,1593.813953  
21,1,8335.375000  
21,1,8152.173077  
21,1,17130.416667  
21,1,1874.993243  
21,1,1545.209459  
21,1,4463.164062  
21,1,2863.318182  
21,1,2304.906250  
21,1,1499.580645  
21,1,6908.790698  
21,1,2358.632653  
21,1,2826.949405  
21,1,15520.613095  
21,1,2582.083333  
21,1,7109.411111  
21,1,11206.781250  
21,1,5573.815972  
21,1,7773.718750  
21,1,2444.613636  
21,1,5276.978659  
21,1,3981.718750  
21,1,2418.215278  
21,1,1707.375000  
21,1,2184.282609  
21,1,10284.205882  
21,1,6418.103571  
21,1,12819.730769  
21,1,13649.382979  
21,1,3509.986702  
21,1,7560.242647  
21,1,15027.222222  
21,1,3849.988636  
21,1,7252.212500  
21,1,1963.803977  
21,1,5660.229167  
21,1,3499.184896  
21,1,7842.329545  
21,1,2504.437500  
21,1,1655.936170  
21,1,1710.945946  
21,1,1920.111702  
21,1,3381.060000  
21,1,2167.210526  
21,1,2128.113636  
21,1,6487.571429  
21,1,2893.931250  
21,1,5510.287791

21,1,1791.769231  
21,1,2803.253472  
21,1,7541.548780  
21,1,4146.170213  
21,1,4400.050000  
21,1,2268.284091  
21,1,2129.875000  
21,1,1540.659091  
21,1,4163.272727  
21,1,3013.937500  
21,1,11239.375000  
21,1,5560.615385  
21,1,2760.698980  
21,1,10815.437500  
21,1,3857.500000  
21,1,1566.173077  
21,1,4414.131579  
21,1,1732.106383  
21,1,1585.779412  
21,1,5544.472561  
21,1,10826.244565  
21,1,3739.245399  
21,1,4056.116848  
21,1,2202.343750  
21,1,3925.100000  
21,1,8199.732759  
21,1,7095.539062  
21,1,3690.349432  
21,1,8886.172414  
21,1,1856.218750  
21,1,13113.278571  
21,1,13871.677419  
21,1,6116.392045  
21,1,1940.750000  
21,1,6218.406250  
21,1,1797.209559  
21,1,1754.692308  
21,1,2260.546875  
21,1,1628.377358  
21,1,13518.750000  
21,1,4070.692308  
21,1,4246.314516  
21,1,17831.401786  
21,1,5147.239865  
21,1,6545.935811  
21,1,4208.058824  
21,1,4665.703125  
21,1,14964.689655  
21,1,6165.927326  
21,1,2951.410714  
21,1,9482.955882  
21,1,2052.328571  
21,1,2621.913462  
21,1,15003.236842  
21,1,1995.187500  
21,1,3805.035714  
21,1,2587.068452  
21,1,6226.096774  
21,1,5775.513889  
21,1,14210.416667  
21,1,1711.280000  
21,1,6713.682292  
21,1,2938.657143  
21,1,16897.757143  
21,1,3355.437500  
21,1,1908.972222

21,1,1902.000000  
21,1,4060.994186  
21,1,2705.919118  
21,1,2815.291667  
21,1,1537.933673  
21,1,3113.097222  
21,1,15458.937500  
21,1,6244.000000  
21,1,16298.637500  
21,1,3495.425781  
21,1,3763.923913  
21,1,11926.909091  
21,1,2406.326087  
21,1,4790.110000  
21,1,1884.813830  
21,1,1753.672222  
21,1,8759.024194  
21,1,7125.553191  
21,1,3142.041667  
21,1,14941.975610  
21,1,1536.875000  
21,1,3340.090909  
21,1,5836.578125  
21,1,8303.564024  
21,1,4826.645349  
21,1,2099.559211  
21,1,1761.290625  
21,1,13011.837209  
21,1,3087.182927  
21,1,5147.887195  
21,1,2795.000000  
21,1,2794.218750  
21,1,7287.632353  
21,1,1670.736979  
21,1,2055.090909  
21,1,2724.139535  
21,1,1796.983871  
21,1,16004.719595  
21,1,2380.019231  
21,1,3980.775000  
21,1,4225.829787  
21,1,1924.955729  
21,1,1715.636364  
21,1,13481.323980  
21,1,1521.029412  
21,1,1627.187500  
21,1,3576.443182  
21,1,2585.038194  
21,1,2361.289474  
21,1,2418.030303  
21,1,8946.820946  
21,1,2359.070312  
21,1,3865.989130  
21,1,2290.375000  
21,1,2499.379464  
21,1,2321.726744  
21,1,12773.519608  
21,1,1617.066176  
21,1,3511.661765  
21,1,3411.028846  
21,1,2965.995833  
21,1,10504.285714  
21,1,2563.215278  
21,1,2454.588235  
21,1,3317.715116  
21,1,2445.762500

21,1,4160.871324  
21,1,4005.578947  
21,1,2160.610795  
21,1,1819.953488  
21,1,2577.982558  
21,1,4446.200521  
21,1,6294.928191  
21,1,1613.709677  
21,1,6088.116071  
21,1,2263.300000  
21,1,8252.500000  
21,1,2261.071875  
21,1,2260.336310  
21,1,2604.543919  
21,1,12404.838816  
21,1,1775.541667  
21,1,2973.062500  
21,1,2468.352273  
21,1,4387.552632  
21,1,7785.632353  
21,1,1837.868750  
21,1,5356.721154  
21,1,1968.384615  
21,1,4006.586538  
21,1,2007.493056  
21,1,1812.027500  
21,1,5461.454545  
21,1,14570.304348  
21,1,1507.742188  
21,1,6846.977778  
21,1,5867.144231  
21,1,4477.395833  
21,1,6184.861111  
21,1,2947.855769  
21,1,2889.742857  
21,1,1568.338415  
21,1,2112.585000  
21,1,3603.455357  
21,1,4007.817308  
21,1,13589.361842  
21,1,3972.125000  
21,1,10797.000000  
21,1,5282.715278  
21,1,3107.617647  
21,1,4887.955696  
21,1,14997.311224  
21,1,2232.698718  
21,1,3835.484375  
21,1,3359.725694  
21,1,1930.379032  
21,1,2661.288462  
21,1,17983.765625  
21,1,1517.000000  
21,1,10131.479167  
21,1,2112.937500  
21,1,2504.425532  
21,1,15166.892857  
21,1,4355.066667  
21,1,3723.840278  
21,1,3589.000000  
21,1,8210.320652  
21,1,12974.000000  
21,1,2072.745192  
21,1,4234.125000  
21,1,1577.857955  
21,1,2635.545455

21,1,1633.600000  
21,1,2744.108173  
21,1,6204.154255  
21,1,5046.178571  
21,1,1707.372159  
21,1,6611.761628  
21,1,7236.901316  
21,1,12794.058673  
21,1,2768.557692  
21,1,15479.193182  
21,1,11653.758929  
21,1,1538.022727  
21,1,1747.824324  
21,1,13800.544811  
21,1,16193.434783  
21,1,2308.839844  
21,1,4504.878125  
21,1,16095.825758  
21,1,4000.082386  
21,1,1732.260000  
21,1,3778.027500  
21,1,2985.954545  
21,1,2284.885638  
21,1,4842.062500  
21,1,3497.750000  
21,1,2336.490385  
21,1,5270.593137  
21,1,2552.700000  
21,1,2970.088816  
21,1,4374.093750  
21,1,4041.107500  
21,1,8567.782609  
21,1,6122.562500  
21,1,17006.877660  
21,1,6249.901042  
21,1,13592.956897  
21,1,5317.444444  
21,1,2843.138298  
21,1,1987.432692  
21,1,3577.600000  
21,1,4063.250000  
21,1,10224.500000  
21,1,4009.454545  
21,1,2073.913462  
21,1,1551.288889  
21,1,18884.458333  
21,1,3260.800000  
21,1,7654.184211  
21,1,3629.894737  
21,1,11845.988372  
21,1,1574.487179  
21,1,11280.465909  
21,1,2572.087838  
21,1,9389.256410  
21,1,1827.403061  
21,1,1718.205882  
21,1,4268.692857  
21,1,12789.080000  
21,1,6269.000000  
21,1,14907.750000  
21,1,14873.477941  
21,1,13345.044118  
21,1,15591.752841  
21,1,3337.679878  
21,1,4518.427419  
21,1,1620.833333

21,1,2585.904762  
21,1,18241.094512  
21,1,2566.852941  
21,1,2459.405172  
21,1,4458.033088  
21,1,4406.801020  
21,1,4095.593750  
21,1,1659.750000  
21,1,12464.223214  
21,1,12116.031250  
21,1,17627.750000  
21,1,1577.472826  
21,1,10629.637500  
21,1,3947.066327  
21,1,1993.779605  
21,1,1517.419444  
21,1,4224.812500  
21,1,5987.423077  
21,1,7715.229167  
21,1,5845.092949  
21,1,2060.058824  
21,1,14028.456522  
21,1,3402.312500  
21,1,3837.717262  
21,1,3275.516129  
21,1,6067.963542  
21,1,2613.729167  
21,1,7466.807692  
21,1,2020.812500  
21,1,1901.292683  
21,1,1899.741935  
21,1,17120.543478  
21,1,14507.848214  
21,1,6022.867647  
21,1,1703.105263  
21,1,3218.560976  
21,1,5237.400000  
21,1,2634.279070  
21,1,3925.236702  
21,1,2404.308511  
21,1,2582.054054  
21,1,6563.027027  
21,1,5481.709677  
21,1,3797.526316  
21,1,2121.100806  
21,1,1637.761905  
21,1,1696.157609  
21,1,16933.263889  
21,1,15621.976190  
21,1,4882.556452  
21,1,1738.030303  
21,1,3739.800000  
21,1,1934.950000  
21,1,3515.664474  
21,1,2423.613281  
21,1,1724.764706  
21,1,3112.470588  
21,1,5003.583333  
21,1,5335.000000  
21,1,4092.295213  
21,1,7698.125000  
21,1,2107.762500  
21,1,5293.875000  
21,1,5803.632812  
21,1,4796.016129  
21,1,5424.441176

21,1,1811.884146  
21,1,1504.105263  
21,1,4739.444444  
21,1,3490.635135  
21,1,1685.250000  
21,1,1815.202703  
21,1,6256.420213  
21,1,2666.750000  
21,1,2949.455357  
21,1,11369.770833  
21,1,1594.000000  
21,1,3332.881250  
21,1,3310.468750  
21,1,19957.339744  
21,1,8434.375000  
21,1,6512.822917  
21,1,2068.250000  
21,1,2928.953488  
21,1,3380.777027  
21,1,4316.875000  
21,1,2026.474359  
21,1,8485.158333  
21,1,3112.571875  
21,1,1508.114130  
21,1,15257.406977  
21,1,3436.095588  
21,1,4656.464744  
21,1,5178.462209  
21,1,2653.661765  
21,1,13510.979167  
21,1,12541.986842  
21,1,4052.705357  
21,1,12919.250000  
21,1,1749.643293  
21,1,7003.000000  
21,1,10797.040441  
21,1,1962.250000  
21,1,4099.801471  
21,1,2090.171875  
21,1,1583.766892  
21,1,6020.335227  
21,1,2751.952381  
21,1,1575.160326  
21,1,2081.417683  
21,1,2865.384615  
21,1,1729.631579  
21,1,7273.701220  
21,1,1856.643939  
21,1,1695.090909  
21,1,15433.085938  
21,1,1935.166667  
21,1,1826.842857  
21,1,3835.687500  
21,1,1799.198171  
21,1,1772.926829  
21,1,4409.878788  
21,1,4649.106618  
21,1,3620.307692  
21,1,3665.500000  
21,1,16456.871094  
21,1,4274.323529  
21,1,15311.056818  
21,1,12307.323171  
21,1,2554.509091  
21,1,1650.852941  
21,1,5665.839286

21,1,7555.288793  
21,1,2135.925000  
21,1,7751.162500  
21,1,9393.375000  
21,1,6171.420732  
21,1,11295.012195  
21,1,1790.003049  
21,1,4198.932692  
21,1,3390.787879  
21,1,5342.544118  
21,1,4275.025000  
21,1,2137.160156  
21,1,2757.723214  
21,1,1598.679688  
21,1,4241.893617  
21,1,1990.939394  
21,1,1560.947368  
21,1,4508.083333  
21,1,6137.295455  
21,1,4760.625000  
21,1,1783.495968  
21,1,1654.038462  
21,1,2243.317073  
21,1,2434.572368  
21,1,3243.309524  
21,1,7040.006944  
21,1,13334.932292  
21,1,2359.921053  
21,1,2656.066667  
21,1,2961.141026  
21,1,18678.444444  
21,1,2479.662500  
21,1,1952.423077  
21,1,1763.200000  
21,1,9705.090426  
21,1,3468.366071  
21,1,1505.593750  
21,1,2932.174528  
21,1,2082.413793  
21,1,3952.674419  
21,1,4468.965000  
21,1,6367.180000  
21,1,4230.888889  
21,1,10647.493902  
21,1,4125.075758  
21,1,16866.660714  
21,1,1727.016026  
21,1,3574.575000  
21,1,19614.588235  
21,1,7211.404762  
21,1,2574.867857  
21,1,2166.000000  
21,1,5661.933673  
21,1,6401.181818  
21,1,2386.734375  
21,1,15248.583333  
21,1,2711.600000  
21,1,2916.410714  
21,1,2512.109091  
21,1,15470.133333  
21,1,1721.284091  
21,1,1615.413043  
21,1,4961.912500  
21,1,8214.000000  
21,1,2090.234043  
21,1,3657.321429

21,1,7437.384615  
21,1,2372.390244  
21,1,10835.115385  
21,1,3104.312500  
21,1,2143.087500  
21,1,7529.458333  
21,1,6795.012255  
21,1,3058.605769  
21,1,2435.302326  
21,1,1576.923077  
21,1,14694.038462  
21,1,1866.337500  
21,1,15067.125000  
21,1,2733.210526  
21,1,5281.666667  
21,1,4181.285714  
21,1,5503.078804  
21,1,3633.263514  
21,1,9609.200000  
21,1,7263.745000  
21,1,2972.600000  
21,1,3583.216216  
21,1,1916.341463  
21,1,7098.892857  
21,1,1964.375000  
21,1,1768.737805  
21,1,4863.488372  
21,1,16669.838235  
21,1,3498.617647  
21,1,2401.944444  
21,1,2317.714286  
21,1,2746.142857  
21,1,1704.702381  
21,1,2731.496622  
21,1,2731.878049  
21,1,14731.250000  
21,1,1915.081250  
21,1,1755.574324  
21,1,10705.000000  
21,1,5094.448276  
21,1,3928.382353  
21,1,2022.000000  
21,1,4858.708333  
21,1,15774.457447  
21,1,17223.555921  
21,1,3333.242188  
21,1,5865.800781  
21,1,4182.011111  
21,1,3492.062500  
21,1,2151.055851  
21,1,4098.228261  
21,1,7378.771812  
21,1,2827.343750  
21,1,8301.180000  
21,1,4838.131579  
21,1,4046.987805  
21,1,3717.465909  
21,1,1556.025641  
21,1,1866.880952  
21,1,3639.103659  
21,1,2945.625000  
21,1,2868.719697  
21,1,2078.872024  
21,1,1691.990625  
21,1,1767.285714  
21,1,2244.702703

21,1,1513.266667  
21,1,2207.745690  
21,1,17869.323718  
21,1,3246.960526  
21,1,1591.980769  
21,1,1522.735294  
21,1,4224.959459  
21,1,3706.986413  
21,1,1739.497340  
21,1,8091.556250  
21,1,2086.428571  
21,1,3583.823529  
21,1,11229.416667  
21,1,3155.910156  
21,1,3342.319149  
21,1,9723.602273  
21,1,1687.201220  
21,1,9749.062500  
21,1,2941.875000  
21,1,3243.829787  
21,1,4221.846154  
21,1,1836.538462  
21,1,3491.343750  
21,1,5971.500000  
21,1,18520.789062  
21,1,6457.178571  
21,1,7713.487805  
21,1,2500.898649  
21,1,5981.099265  
21,1,4234.395833  
21,1,5558.317308  
21,1,6499.718750  
21,1,3081.964286  
21,1,18422.558140  
21,1,1517.612500  
21,1,1787.221429  
21,1,6456.973485  
21,1,7092.562500  
21,1,15724.692308  
21,1,2262.058824  
21,1,5104.172222  
21,1,4360.214286  
21,1,3325.060345  
21,1,3056.663889  
21,1,2104.187500  
21,1,2160.422619  
21,1,2449.531915  
21,1,2234.769231  
21,1,1559.243590  
21,1,3560.897436  
21,1,1984.545732  
21,1,2890.702128  
21,1,3037.107143  
21,1,3697.500000  
21,1,4715.428571  
21,1,2685.894231  
21,1,1651.453125  
21,1,12721.596154  
21,1,4641.543478  
21,1,13922.211310  
21,1,1551.128676  
21,1,3632.613971  
21,1,16056.500000  
21,1,1752.647059  
21,1,2112.500000  
21,1,3161.408654

21,1,6456.428571  
21,1,3467.185811  
21,1,1873.646341  
21,1,3919.557692  
21,1,7160.621324  
21,1,6195.849359  
21,1,3363.375000  
21,1,3933.378049  
21,1,1726.055147  
21,1,6427.243902  
21,1,7170.080882  
21,1,2907.700658  
21,1,3797.030405  
21,1,3888.000000  
21,1,12595.405303  
21,1,1517.807692  
21,1,3058.725806  
21,1,2283.005319  
21,1,12506.681034  
21,1,8283.442308  
21,1,3059.857143  
21,1,4270.454861  
21,1,2905.732143  
21,1,7784.261905  
21,1,5012.534483  
21,1,6090.636719  
21,1,16894.300000  
21,1,8343.000000  
21,1,1766.405172  
21,1,4910.390625  
21,1,3289.625000  
21,1,5693.865385  
21,1,4858.388889  
21,1,7501.459239  
21,1,1669.971154  
21,1,5914.550000  
21,1,3473.765625  
21,1,2849.000000  
21,1,2469.193182  
21,1,10002.906250  
21,1,4957.923077  
21,1,3723.433824  
21,1,11186.500000  
21,1,4238.363636  
21,1,7347.768293  
21,1,2038.750000  
21,1,8167.220588  
21,1,7017.950893  
21,1,4722.545455  
21,1,3347.651786  
21,1,9297.250000  
21,1,15496.334677  
21,1,2227.858333  
21,1,7113.121951  
21,1,2028.647059  
21,1,3254.470588  
21,1,9733.988636  
21,1,4028.646341  
21,1,2036.209559  
21,1,4995.820513  
21,1,9700.718750  
21,1,3535.012195  
21,1,1521.109375  
21,1,13817.734756  
21,1,6298.727941  
21,1,3997.029412

21,1,4040.906977  
21,1,16200.698276  
21,1,3604.630952  
21,1,2842.153846  
21,1,6890.963235  
21,1,7098.262500  
21,1,10693.992188  
21,1,2213.757143  
21,1,1923.231707  
21,1,9206.892857  
21,1,1576.357143  
21,1,8923.481707  
21,1,1613.740132  
21,1,3131.444444  
21,1,8061.220588  
21,1,4434.321429  
21,1,16170.791667  
21,1,7673.875000  
21,1,1892.968750  
21,1,6181.591346  
21,1,2540.529412  
21,1,8352.634615  
21,1,2970.000000  
21,1,1942.977941  
21,1,4558.454545  
21,1,2947.470588  
21,1,6048.195513  
21,1,2842.794872  
21,1,2013.058140  
21,1,5411.891892  
21,1,8038.764706  
21,1,4166.337838  
21,1,9712.020833  
21,1,1562.446970  
21,1,11633.525735  
21,1,1677.000000  
21,1,8511.388298  
21,1,2866.931250  
21,1,2742.087500  
21,1,1537.687500  
21,1,2769.764423  
21,1,6632.312500  
21,1,10912.504310  
21,1,6056.507353  
21,1,4203.913462  
21,1,15249.468750  
21,1,2189.833333  
21,1,1757.415323  
21,1,6770.325000  
21,1,4240.487179  
21,1,5193.730769  
21,1,4197.303977  
21,1,3391.985294  
21,1,2854.263158  
21,1,1548.678571  
21,1,6778.396341  
21,1,4532.055556  
21,1,2410.339286  
21,1,7641.000000  
21,1,5737.338235  
21,1,4267.256410  
21,1,3221.962766  
21,1,3328.496951  
21,1,2951.421053  
21,1,3381.033333  
21,1,1633.622222

21,1,5117.696429  
21,1,9641.932432  
21,1,2456.397436  
21,1,4451.166667  
21,1,2986.679878  
21,1,3627.250000  
21,1,4470.755435  
21,1,19968.939394  
21,1,2413.853659  
21,1,1556.147059  
21,1,2404.761905  
21,1,3434.012500  
21,1,7958.736486  
21,1,18192.450000  
21,1,5812.967742  
21,1,5146.000000  
21,1,17487.840278  
21,1,2095.870370  
21,1,3882.423611  
21,1,1854.855000  
21,1,4490.316176  
21,1,5628.886719  
21,1,7931.031250  
21,1,2250.042683  
21,1,10018.203125  
21,1,2176.625000  
21,1,5661.353125  
21,1,1799.145349  
21,1,1502.479167  
21,1,2777.451389  
21,1,3612.375000  
21,1,2990.330882  
21,1,3544.835227  
21,1,5966.585366  
21,1,2902.967742  
21,1,5237.037500  
21,1,1704.472222  
21,1,10219.964286  
21,1,11377.682927  
21,1,1832.297619  
21,1,2194.589286  
21,1,3210.160714  
21,1,9055.639535  
21,1,9871.229167  
21,1,3059.384615  
21,1,1750.027778  
21,1,1704.547222  
21,1,1821.704268  
21,1,2191.804878  
21,1,11892.000000  
21,1,11118.907738  
21,1,1752.625000  
21,1,17796.717949  
21,1,2912.110294  
21,1,2500.473214  
21,1,3931.090278  
21,1,3088.388298  
21,1,2247.141304  
21,1,5626.724359  
21,1,2376.953488  
21,1,5702.913265  
21,1,1622.010638  
21,1,3087.107955  
21,1,1732.596875  
21,1,7196.977941  
21,1,2300.000000

21,1,4751.252404  
21,1,7418.438144  
21,1,3193.358696  
21,1,5221.196023  
21,1,1984.666667  
21,1,10905.000000  
21,1,1828.632812  
21,1,4436.117647  
21,1,3047.082500  
21,1,1952.787879  
21,1,6150.651786  
21,1,3726.937500  
21,1,4460.484375  
21,1,2924.865385  
21,1,10289.625000  
21,1,1689.694149  
21,1,9380.931548  
21,1,3404.293478  
21,1,3858.250000  
21,1,4067.521739  
21,1,13349.750000  
21,1,18850.000000  
21,1,4692.913690  
21,1,4312.833333  
21,1,5951.532895  
21,1,3060.510870  
21,1,6694.209677  
21,1,5015.731707  
21,1,16107.402174  
21,1,2545.848039  
21,1,3749.734375  
21,1,2396.510870  
21,1,3316.425000  
21,1,9775.867021  
21,1,3827.675000  
21,1,11627.812500  
21,1,12272.175676  
21,1,1840.720588  
21,1,7200.000000  
21,1,7225.793919  
21,1,4460.900000  
21,1,17565.000000  
21,1,2784.866667  
21,1,6314.947500  
21,1,5648.750000  
21,1,3351.575000  
21,1,10332.567073  
21,1,6718.823529  
21,1,2684.678977  
21,1,3073.393617  
21,1,19500.075000  
21,1,2646.250000  
21,1,1977.750000  
21,1,2773.886364  
21,1,2410.472222  
21,1,4037.437500  
21,1,8696.964286  
21,1,2231.669872  
21,1,9564.820513  
21,1,1718.753049  
21,1,7196.610465  
21,1,17451.273256  
21,1,6720.546196  
21,1,2558.211957  
21,1,1812.959677  
21,1,10578.076613

21,1,3811.550000  
21,1,2016.641304  
21,1,2237.774194  
21,1,2878.203488  
21,1,3344.093750  
21,1,15180.652027  
21,1,5890.821429  
21,1,2180.828431  
21,1,2824.892857  
21,1,1747.470588  
21,1,4775.546875  
21,1,4913.367347  
21,1,1713.601563  
21,1,2340.619898  
21,1,16227.705882  
21,1,9844.120000  
21,1,8225.187500  
21,1,2528.519231  
21,1,4829.467391  
21,1,3292.176282  
21,1,6898.112069  
21,1,18585.899457  
21,1,3091.527778  
21,1,6129.461538  
21,1,9740.771552  
21,1,4844.673077  
21,1,7747.229167  
21,1,1812.561224  
21,1,1713.875000  
21,1,3867.523810  
21,1,3980.057692  
21,1,6044.359756  
21,1,3645.434375  
21,1,3430.421512  
21,1,5709.339286  
21,1,3883.519231  
21,1,5823.200000  
21,1,3877.729730  
21,1,7413.258523  
21,1,2088.984375  
21,1,3215.284091  
21,1,17583.051282  
21,1,8138.764706  
21,1,16369.997340  
21,1,11691.560897  
21,1,2512.008065  
21,1,4742.109375  
21,1,3040.675000  
21,1,8126.073529  
21,1,4807.833333  
21,1,14629.887255  
21,1,1541.985294  
21,1,2234.863095  
21,1,7668.014706  
21,1,10006.857143  
21,1,1857.176829  
21,1,7800.024510  
21,1,2692.810976  
21,1,6497.614583  
21,1,7317.642361  
21,1,1591.149306  
21,1,9112.567568  
21,1,19106.000000  
21,1,3361.727273  
21,1,13930.923611  
21,1,12080.958333

21,1,1879.388514  
21,1,1983.916667  
21,1,6119.645161  
21,1,4342.375000  
21,1,2476.750000  
21,1,2368.066667  
21,1,2407.750000  
21,1,3845.250000  
21,1,4878.859375  
21,1,3778.359756  
21,1,1934.896277  
21,1,15613.127660  
21,1,2668.059659  
21,1,2874.380208  
21,1,1829.137255  
21,1,4362.547170  
21,1,2258.691860  
21,1,4682.500000  
21,1,7006.025000  
21,1,6958.604592  
21,1,2597.145833  
21,1,3482.219512  
21,1,4416.504630  
21,1,7618.702128  
21,1,1874.234375  
21,1,7320.953125  
21,1,14713.894231  
21,1,9315.914062  
21,1,4163.020349  
21,1,4714.192308  
21,1,6665.219512  
21,1,3682.916667  
21,1,4566.851064  
21,1,2542.540441  
21,1,2195.559211  
21,1,2244.896552  
21,1,1826.209302  
21,1,4902.572222  
21,1,1536.000000  
21,1,15042.746429  
21,1,7357.069853  
21,1,2342.550000  
21,1,1520.815217  
21,1,7860.977500  
21,1,1711.318182  
21,1,12713.622093  
21,1,18630.009615  
21,1,1802.205128  
21,1,2472.461207  
21,1,19329.345395  
21,1,1817.175532  
21,1,2145.731707  
21,1,4748.664286  
21,1,6379.819767  
21,1,3751.496212  
21,1,5984.232558  
21,1,2308.984043  
21,1,2040.846774  
21,1,8095.666667  
21,1,12971.179688  
21,1,5212.145833  
21,1,2027.838068  
21,1,2720.233108  
21,1,1807.966216  
21,1,13444.139423  
21,1,17061.128049

21,1,14167.730469  
21,1,12059.580882  
21,1,3179.054054  
21,1,4335.072581  
21,1,17405.708333  
21,1,3822.450000  
22,2,8515.612500  
22,2,1691.115385  
22,2,2027.730159  
22,2,2154.866667  
22,2,1551.437500  
22,2,1534.255102  
22,2,1579.448980  
22,2,2981.643868  
22,2,2956.391304  
22,2,2533.107143  
22,2,1975.484375  
22,2,1535.886905  
22,2,2858.565789  
22,2,1860.295732  
22,2,1540.062500  
22,2,1745.364583  
22,2,2330.363636  
22,2,1869.140244  
22,2,2396.298913  
22,2,1542.470238  
22,2,2754.061224  
22,2,7145.085366  
22,2,6682.605769  
22,2,4458.370370  
22,2,2264.029412  
22,2,2046.625000  
22,2,2041.410000  
22,2,1555.421569  
22,2,2243.318182  
22,2,1638.510638  
22,2,2542.471591  
22,2,1646.338889  
22,2,2282.602500  
22,2,2216.083333  
22,2,1828.655612  
22,2,1689.562500  
22,2,1630.795455  
22,2,2144.517857  
22,2,2585.291667  
22,2,4445.419643  
22,2,2409.041667  
22,2,1504.158654  
22,2,1782.316327  
22,2,1726.935000  
22,2,2460.377778  
22,2,2205.622093  
22,2,2337.142857  
22,2,2975.556034  
22,2,5502.079787  
22,2,1968.695122  
22,2,1799.045455  
22,2,3969.480114  
22,2,2793.846154  
22,2,16579.951220  
22,2,2463.781250  
22,2,2352.264205  
22,2,1701.333333  
22,2,5002.786932  
22,2,1698.651786  
22,2,1543.331731

22,2,4189.011719  
22,2,2034.178571  
22,2,1926.990741  
22,2,1782.380952  
22,2,3757.985465  
22,2,2103.324519  
22,2,1748.895270  
22,2,1827.106383  
22,2,2043.475000  
22,2,2052.520833  
22,2,2552.480769  
22,2,4359.757576  
22,2,1517.513514  
22,2,1590.707317  
22,2,5932.433673  
22,2,2110.971875  
22,2,2723.780000  
22,2,2536.707447  
22,2,2052.443182  
22,2,2177.072674  
22,2,1660.768293  
22,2,1837.920213  
22,2,2096.725000  
22,2,2283.162162  
22,2,1575.884434  
22,2,2834.150943  
22,2,2105.436275  
22,2,2019.755208  
22,2,2665.245536  
22,2,2120.742925  
22,2,3013.931818  
22,2,3069.325581  
22,2,1773.191860  
22,2,3570.538462  
22,2,1784.954545  
22,2,1707.675595  
22,2,2152.804825  
22,2,2314.280612  
22,2,2081.797619  
22,2,1653.927632  
22,2,1544.323529  
22,2,1779.555556  
22,2,10471.515957  
22,2,1834.456081  
22,2,3167.406250  
22,2,2206.058824  
22,2,1755.392857  
22,2,1621.982143  
22,2,3043.858491  
22,2,4784.075000  
22,2,1556.243243  
22,2,1559.132500  
22,2,3206.269737  
22,2,1811.356771  
22,2,2614.750000  
22,2,1567.801471  
22,2,1816.139881  
22,2,1929.940217  
22,2,2068.383721  
22,2,2457.969388  
22,2,3236.329787  
22,2,1906.621951  
22,2,2870.685185  
22,2,7226.617500  
22,2,2179.000000  
22,2,2163.199468

22,2,1723.691489  
22,2,1529.166667  
22,2,2231.280000  
22,2,1603.335000  
22,2,1541.326531  
22,2,2190.332447  
22,2,11644.448819  
22,2,1844.506250  
22,2,3483.750000  
22,2,1515.317073  
22,2,1520.972222  
22,2,2049.411458  
22,2,2304.230392  
22,2,3206.750000  
22,2,1615.929687  
22,2,1584.773026  
22,2,1671.923977  
22,2,1671.058140  
22,2,1573.780488  
22,2,1592.842105  
22,2,2045.181159  
22,2,1586.997807  
22,2,2979.482759  
22,2,4165.144231  
22,2,5857.769737  
22,2,1516.329268  
22,2,1768.000000  
22,2,1916.787037  
22,2,1626.177778  
22,2,1720.012500  
22,2,2543.400000  
22,2,1795.885204  
22,2,3277.476974  
22,2,1576.422500  
22,2,2155.620000  
22,2,1633.802326  
22,2,1944.704545  
22,2,8304.627273  
22,2,5438.221591  
22,2,2941.198980  
22,2,1516.000000  
22,2,3178.591146  
22,2,1769.491667  
22,2,5407.215426  
22,2,2125.458333  
22,2,2810.211538  
22,2,2376.065217  
22,2,1516.700000  
22,2,2123.925714  
22,2,1750.670455  
22,2,1785.357143  
22,2,1828.080882  
22,2,1593.828804  
22,2,3177.836957  
22,2,2023.472727  
22,2,2299.923077  
22,2,1755.633721  
22,2,1742.128571  
22,2,2811.618182  
22,2,1919.022321  
22,2,3249.944444  
22,2,1767.333333  
22,2,2014.724138  
22,2,1723.260870  
22,2,1671.127358  
22,2,2695.547170

22,2,1763.339674  
22,2,1627.656977  
22,2,1915.953488  
22,2,2050.875000  
22,2,1613.911765  
22,2,3102.798295  
22,2,2642.307292  
22,2,3297.487245  
22,2,2741.823529  
22,2,2246.233333  
22,2,1805.651316  
22,2,2384.052632  
22,2,5360.517241  
22,2,2617.250000  
22,2,1726.825000  
22,2,1746.352273  
22,2,5200.808140  
22,2,1635.333333  
22,2,1503.577128  
22,2,1903.150000  
22,2,1744.877358  
22,2,1612.990385  
22,2,8432.618750  
22,2,2532.766304  
22,2,1972.316327  
22,2,2888.661058  
22,2,2319.625000  
22,2,2003.881579  
22,2,3366.105263  
22,2,1722.459184  
22,2,1910.679487  
22,2,10386.601190  
22,2,2487.625000  
22,2,1697.235294  
22,2,2189.101064  
22,2,2050.720588  
22,2,1838.080000  
22,2,1544.805556  
22,2,1827.187500  
22,2,1592.990385  
22,2,1683.941176  
22,2,2583.294643  
22,2,2318.425000  
22,2,1541.803571  
22,2,2626.785714  
22,2,1659.492647  
22,2,1811.000000  
22,2,1538.125000  
22,2,3694.088068  
22,2,2721.375000  
22,2,1548.023026  
22,2,1640.695652  
22,2,1824.983333  
22,2,2413.695513  
22,2,2914.073171  
22,2,1920.308190  
22,2,1839.125000  
22,2,3314.520000  
22,2,2344.971154  
22,2,1786.058673  
22,2,3130.983051  
22,2,2393.035326  
22,2,7564.431034  
22,2,1651.604592  
22,2,2012.598039  
22,2,1690.173780

22,2,1747.072674  
22,2,1677.108696  
22,2,1531.146875  
22,2,2854.734375  
22,2,1813.312500  
22,2,2766.000000  
22,2,2819.000000  
22,2,1619.870000  
22,2,1706.705128  
22,2,1881.142857  
22,2,2425.285714  
22,2,1584.190217  
22,2,1945.312500  
22,2,4836.281646  
22,2,1575.508929  
22,2,1563.458333  
22,2,2835.016447  
22,2,9282.174419  
22,2,11864.698113  
22,2,8882.622159  
22,2,2076.400000  
22,2,1887.325581  
22,2,2803.094828  
22,2,1810.426829  
22,2,1659.714286  
22,2,2538.583333  
22,2,1881.102273  
22,2,1584.333333  
22,2,4764.327381  
22,2,2652.740385  
22,2,2721.580189  
22,2,1506.377358  
22,2,1772.175000  
22,2,2363.165761  
22,2,1659.500000  
22,2,2073.500000  
22,2,1668.165094  
22,2,2153.837838  
22,2,2422.454327  
22,2,1499.875000  
22,2,2824.272727  
22,2,2268.154762  
22,2,2191.455729  
22,2,2123.605000  
22,2,1598.187500  
22,2,1779.125000  
22,2,3073.353659  
22,2,2856.714286  
22,2,1658.890244  
22,2,3383.036458  
22,2,2189.472222  
22,2,1817.381579  
22,2,15662.422872  
22,2,1536.245000  
22,2,2474.591912  
22,2,3627.433333  
22,2,1689.497340  
22,2,4458.100000  
22,2,1939.660714  
22,2,2708.460784  
22,2,1572.450000  
22,2,2389.187500  
22,2,1802.771277  
22,2,7020.720930  
22,2,1514.077206  
22,2,1620.452128

22,2,2026.486413  
22,2,2007.484375  
22,2,1851.981383  
22,2,1708.043478  
22,2,1983.827586  
22,2,3671.723684  
22,2,2049.440341  
22,2,2216.177419  
22,2,2029.235849  
22,2,1623.175532  
22,2,2259.547297  
22,2,3788.770270  
22,2,2185.093023  
22,2,3145.453125  
22,2,2005.995614  
22,2,2022.780488  
22,2,1520.196809  
22,2,1615.846875  
22,2,2739.593085  
22,2,1701.906250  
22,2,1911.573171  
22,2,1693.432292  
22,2,1940.875000  
22,2,1895.362245  
22,2,1600.510204  
22,2,3778.346939  
22,2,1616.260870  
22,2,1621.888889  
22,2,2629.532895  
22,2,1594.350000  
22,2,1499.910714  
22,2,3022.966981  
22,2,1818.500000  
22,2,2282.545455  
22,2,3922.562500  
22,2,1663.472973  
22,2,1755.900000  
22,2,1562.906250  
22,2,1522.474537  
22,2,3074.464744  
22,2,1641.727941  
22,2,2658.202778  
22,2,1556.180000  
22,2,2275.700581  
22,2,3141.822917  
22,2,1839.409884  
22,2,2799.200000  
22,2,1574.614130  
22,2,2331.467105  
22,2,1959.414286  
22,2,2404.304348  
22,2,1616.940104  
22,2,2008.553977  
22,2,1850.122222  
22,2,2868.935897  
22,2,2009.128571  
22,2,1887.875000  
22,2,1719.578947  
22,2,1574.872340  
22,2,3306.864130  
22,2,2195.078431  
22,2,2131.414773  
22,2,2066.200000  
22,2,1788.448864  
22,2,1707.054054  
22,2,2458.180000

22,2,2215.955882  
22,2,2723.050000  
22,2,2136.870370  
22,2,1722.815476  
22,2,3387.419643  
22,2,3579.489130  
22,2,2340.678571  
22,2,5033.755319  
22,2,1771.531977  
22,2,2055.576271  
22,2,3544.865741  
22,2,5596.872093  
22,2,1951.636364  
22,2,1899.263514  
22,2,1601.636792  
22,2,1574.221698  
22,2,1803.162500  
22,2,1674.525862  
22,2,2258.645408  
22,2,5026.858553  
22,2,1608.908163  
22,2,1641.125000  
22,2,2594.875000  
22,2,2351.596591  
22,2,1523.300000  
22,2,3435.240000  
22,2,1608.513514  
22,2,2101.423077  
22,2,3205.149038  
22,2,1516.562500  
22,2,2322.364130  
22,2,1783.912791  
22,2,3485.403846  
22,2,1690.266667  
22,2,1725.477041  
22,2,5043.622449  
22,2,4607.380952  
22,2,3578.090909  
22,2,1719.742647  
22,2,3066.115385  
22,2,3125.363636  
22,2,3174.166667  
22,2,3037.172414  
22,2,3257.044444  
22,2,2056.359375  
22,2,3405.913690  
22,2,3080.659091  
22,2,1588.937500  
22,2,2413.432692  
22,2,4883.553977  
22,2,2258.439815  
22,2,2324.937500  
22,2,2627.056122  
22,2,3590.407895  
22,2,3988.553571  
22,2,1979.821429  
22,2,3515.732143  
22,2,2319.767857  
22,2,2606.406250  
22,2,2325.702381  
22,2,3150.437500  
22,2,3088.429487  
22,2,1527.484375  
22,2,2013.787500  
22,2,1648.267442  
22,2,1698.878378

22,2,1742.866667  
22,2,2984.540816  
22,2,2874.026442  
22,2,1858.358108  
22,2,4416.367347  
22,2,2236.050000  
22,2,2319.913043  
22,2,1901.198370  
22,2,2175.775862  
22,2,1654.872024  
22,2,2701.024390  
22,2,1819.125000  
22,2,3059.150000  
22,2,2500.431034  
22,2,1642.968750  
22,2,1766.487500  
22,2,3856.750000  
22,2,3970.780000  
22,2,1882.000000  
22,2,1587.906250  
22,2,2345.038462  
22,2,2820.602041  
22,2,2405.169643  
22,2,1741.836957  
22,2,2550.500000  
22,2,2032.692308  
22,2,2106.000000  
22,2,2220.581395  
22,2,3890.971154  
22,2,1578.654762  
22,2,2344.238095  
22,2,2282.652174  
22,2,1985.910714  
22,2,1879.710526  
22,2,1797.658537  
22,2,2182.902174  
22,2,2189.717391  
22,2,2504.631579  
22,2,4231.309524  
22,2,2398.412162  
22,2,2739.875000  
22,2,1742.427632  
22,2,4146.446524  
22,2,10239.521875  
22,2,1808.250000  
22,2,2783.052632  
22,2,2124.625000  
22,2,2097.259434  
22,2,1548.037736  
22,2,1618.000000  
22,2,2645.660377  
22,2,1920.529412  
22,2,1652.972222  
22,2,1877.593085  
22,2,9416.370833  
22,2,2248.142857  
22,2,1570.744444  
22,2,2055.558824  
22,2,1513.073171  
22,2,1594.984375  
22,2,3405.719388  
22,2,1540.425926  
22,2,1662.000000  
22,2,5866.938679  
22,2,1831.000000  
22,2,1862.788043

22,2,3295.778409  
22,2,1603.381944  
22,2,1584.769022  
22,2,2538.730932  
22,2,1654.771739  
22,2,2219.375000  
22,2,2320.416667  
22,2,2230.875000  
22,2,4508.224490  
22,2,1617.602778  
22,2,1702.375000  
22,2,1846.407895  
22,2,1740.125000  
22,2,2103.812500  
22,2,1519.687500  
22,2,1569.570652  
22,2,1750.704861  
22,2,1677.283784  
22,2,5342.239130  
22,2,2024.375000  
22,2,2522.355978  
22,2,2497.333333  
22,2,2074.497807  
22,2,4267.353659  
22,2,1893.476190  
22,2,2410.200000  
22,2,1804.788043  
22,2,2428.050000  
22,2,2558.787500  
22,2,1732.781250  
22,2,1565.163265  
22,2,3562.153846  
22,2,1794.062500  
22,2,3340.662500  
22,2,2183.307692  
22,2,2206.399194  
22,2,2531.594388  
22,2,2816.173913  
22,2,1544.264706  
22,2,3159.875000  
22,2,1503.000000  
22,2,3542.467262  
22,2,19372.500000  
22,2,2848.366667  
22,2,2534.064286  
22,2,1870.363636  
22,2,1894.171429  
22,2,1725.243902  
22,2,1739.000000  
22,2,3215.689024  
22,2,1636.827381  
22,2,2127.563679  
22,2,1819.738372  
22,2,1951.073980  
22,2,3087.764706  
22,2,2214.588235  
22,2,1594.905405  
22,2,1615.715909  
22,2,3419.460000  
22,2,1723.071429  
22,2,4062.479545  
22,2,4347.500000  
22,2,1564.076087  
22,2,1675.182927  
22,2,3335.227273  
22,2,2545.312500

22,2,1673.717105  
22,2,2216.312500  
22,2,2049.533163  
22,2,3130.180556  
22,2,3037.360000  
22,2,1852.139535  
22,2,3421.245283  
22,2,1903.250000  
22,2,1504.804688  
22,2,3254.772727  
22,2,1903.400000  
22,2,1540.380952  
22,2,7185.318966  
22,2,3421.494318  
22,2,2331.351190  
22,2,2247.862179  
22,2,2368.933824  
22,2,1559.815789  
22,2,1887.086735  
22,2,1501.742647  
22,2,3377.250000  
22,2,2285.837766  
22,2,1965.829787  
22,2,2362.037037  
22,2,1611.813953  
22,2,1750.760000  
22,2,2287.653846  
22,2,1737.695652  
22,2,1814.125000  
22,2,1632.347826  
22,2,1599.447368  
22,2,2553.187500  
22,2,1706.000000  
22,2,1563.326087  
22,2,1523.558036  
22,2,3550.336323  
22,2,3788.367647  
22,2,1653.943182  
22,2,2151.448980  
22,2,1905.806122  
22,2,2321.507653  
22,2,1978.073171  
22,2,2461.052632  
22,2,1562.807500  
22,2,2086.042857  
22,2,2147.850000  
22,2,12262.125000  
22,2,3632.386905  
22,2,2356.545455  
22,2,2681.435096  
22,2,2123.505814  
22,2,3172.187500  
22,2,1509.820000  
22,2,1615.769608  
22,2,2484.166667  
22,2,5553.819444  
22,2,1818.096154  
22,2,2237.446429  
22,2,3285.710227  
22,2,1712.837500  
22,2,1800.000000  
22,2,1728.916667  
22,2,1839.921296  
22,2,1528.404762  
22,2,1499.321970  
22,2,2564.919355

22,2,1914.587838  
22,2,2222.263393  
22,2,1968.538462  
22,2,1626.112245  
22,2,2247.492500  
22,2,4617.694853  
22,2,1762.866667  
22,2,1525.718750  
22,2,2762.733333  
22,2,1936.000000  
22,2,5204.823171  
22,2,4565.736842  
22,2,3163.093750  
22,2,1679.313776  
22,2,1691.594340  
22,2,2129.193878  
22,2,3261.601744  
22,2,2228.914773  
22,2,1699.750000  
22,2,4632.908088  
22,2,2637.210000  
22,2,1623.823864  
22,2,2243.839286  
22,2,1673.108108  
22,2,2299.440341  
22,2,2000.997159  
22,2,3238.200000  
22,2,2521.218085  
22,2,1717.866071  
22,2,1506.152439  
22,2,1543.571429  
22,2,1636.187500  
22,2,2773.665441  
22,2,1606.712209  
22,2,2849.994792  
22,2,2123.696429  
22,2,1515.313830  
22,2,2757.125000  
22,2,1976.824627  
22,2,1825.490385  
22,2,1935.666667  
22,2,1649.333333  
22,2,1751.418750  
22,2,1545.505556  
22,2,1859.450000  
22,2,1871.151442  
22,2,1726.122093  
22,2,1534.019022  
22,2,3175.141304  
22,2,3160.484375  
22,2,2067.595930  
22,2,3916.809896  
22,2,2108.551020  
22,2,1704.437500  
22,2,1525.707386  
22,2,1707.000000  
22,2,8429.736842  
22,2,2578.857143  
22,2,2172.256098  
22,2,1720.649038  
22,2,2953.316176  
22,2,3098.606383  
22,2,3103.734694  
22,2,1745.825000  
22,2,1550.413462  
22,2,2008.594444

22,2,2253.186047  
22,2,1711.535000  
22,2,1796.294872  
22,2,1810.832447  
22,2,1821.038194  
22,2,3060.539773  
22,2,1946.519022  
22,2,1519.319149  
22,2,2034.644444  
22,2,1985.502604  
22,2,2148.061170  
22,2,2590.226190  
22,2,1840.315476  
22,2,2193.789189  
22,2,2124.807692  
22,2,1704.744444  
22,2,4220.330645  
22,2,1851.139706  
22,2,1507.495192  
22,2,1803.858974  
22,2,1891.202128  
22,2,2840.922727  
22,2,4369.078947  
22,2,1839.683908  
22,2,2070.047619  
22,2,2405.477273  
22,2,2995.387755  
22,2,1943.783537  
22,2,3934.538462  
22,2,2981.820513  
22,2,2750.063830  
22,2,3660.085714  
22,2,2065.811321  
22,2,1668.453947  
22,2,1761.685096  
22,2,4963.611111  
22,2,3694.200000  
22,2,5150.065217  
22,2,2518.017857  
22,2,1891.977273  
22,2,2182.991279  
22,2,1522.750000  
22,2,1721.118304  
22,2,2331.836957  
22,2,2942.640625  
22,2,2042.702703  
22,2,2284.043478  
22,2,2034.818182  
22,2,1560.117021  
22,2,1541.212121  
22,2,1925.284483  
22,2,1636.375000  
22,2,1633.896341  
22,2,2387.800000  
22,2,1842.937500  
22,2,2547.125000  
22,2,1785.180851  
22,2,2043.583333  
22,2,3194.634868  
22,2,1870.037037  
22,2,1563.416667  
22,2,1790.000000  
22,2,1651.086957  
22,2,2302.613372  
22,2,1562.393229  
22,2,1511.550000

22,2,3389.734694  
22,2,2357.708333  
22,2,3229.256410  
22,2,1918.625000  
22,2,1842.959184  
22,2,1881.394886  
22,2,1534.191489  
22,2,1549.818878  
22,2,5088.125000  
22,2,1561.272727  
22,2,2141.684211  
22,2,1538.565217  
22,2,1751.225000  
22,2,2230.757979  
22,2,4867.855978  
22,2,2162.500000  
22,2,1735.299242  
22,2,2064.254902  
22,2,1887.357143  
22,2,1560.692308  
22,2,1660.000000  
22,2,2850.750000  
22,2,3021.529412  
22,2,2700.782609  
22,2,2406.468085  
22,2,1917.855263  
22,2,3353.837209  
22,2,3137.160000  
22,2,1539.041667  
22,2,1677.327500  
22,2,1971.517857  
22,2,2876.703947  
22,2,1726.229167  
22,2,1812.149457  
22,2,1929.687500  
22,2,2740.060000  
22,2,3482.220588  
22,2,2456.340278  
22,2,2148.731132  
22,2,2245.236842  
22,2,2795.942308  
22,2,2462.782051  
22,2,1594.797727  
22,2,1783.975610  
22,2,1499.120690  
22,2,2868.571429  
22,2,1500.222222  
22,2,1827.297297  
22,2,2265.200581  
22,2,1751.989130  
22,2,2625.959184  
22,2,1655.196429  
22,2,2247.875000  
22,2,2017.425595  
22,2,2437.369444  
22,2,1741.484375  
22,2,2019.441176  
22,2,1502.214286  
22,2,1613.441860  
22,2,2209.564516  
22,2,2608.488636  
22,2,1874.281250  
22,2,1820.180233  
22,2,2146.397959  
22,2,1910.315341  
22,2,4115.471154

22,2,3196.622222  
22,2,2658.843750  
22,2,1943.014706  
22,2,1999.375000  
22,2,1854.661932  
22,2,1571.896739  
22,2,3123.832386  
22,2,1954.996875  
22,2,2242.518617  
22,2,2413.027174  
22,2,2065.256098  
22,2,2645.454545  
22,2,4796.920455  
22,2,2326.369565  
22,2,2409.000000  
22,2,2482.824503  
22,2,3151.813830  
22,2,1754.026316  
22,2,2111.654070  
22,2,1659.199468  
22,2,15976.062500  
22,2,6062.840116  
22,2,1774.243902  
22,2,1520.241379  
22,2,1913.785714  
22,2,2901.562500  
22,2,1690.543750  
22,2,1724.464744  
22,2,3373.776515  
22,2,2254.192500  
22,2,1580.500000  
22,2,2139.020000  
22,2,2177.552885  
22,2,1619.833333  
22,2,1683.666667  
22,2,2091.095238  
22,2,1905.041667  
22,2,1719.781863  
22,2,2651.094512  
22,2,2074.945755  
22,2,3265.169811  
22,2,2157.758152  
22,2,2132.887255  
22,2,1769.572674  
22,2,2761.970745  
22,2,2656.565217  
22,2,1503.437500  
22,2,2352.165094  
22,2,1720.692308  
22,2,5031.821023  
22,2,2607.848958  
22,2,11968.421875  
22,2,1586.356383  
22,2,2112.337766  
22,2,2862.958333  
22,2,2993.441176  
22,2,5841.100000  
22,2,2496.956522  
22,2,1655.085034  
22,2,1588.864362  
22,2,1878.556818  
22,2,1616.803571  
22,2,2517.862500  
22,2,3739.586957  
22,2,1785.872093  
22,2,3288.250000

22,2,2483.750000  
22,2,2949.298387  
22,2,1926.459184  
22,2,1540.722222  
22,2,2020.668605  
22,2,3162.967105  
22,2,1987.772727  
22,2,8631.442500  
22,2,2280.397959  
22,2,2077.875000  
22,2,1850.561111  
22,2,1586.176471  
22,2,3477.679545  
22,2,1817.823718  
22,2,1739.255000  
22,2,2047.882979  
22,2,1857.601744  
22,2,1691.839286  
22,2,3361.289773  
22,2,1560.165761  
22,2,2133.071429  
22,2,1601.081081  
22,2,1879.125000  
22,2,3393.145833  
22,2,1880.520833  
22,2,1712.840625  
22,2,1750.470930  
22,2,6267.290000  
22,2,2095.369318  
22,2,6602.686475  
22,2,1998.590909  
22,2,1503.714286  
22,2,1695.206897  
22,2,1756.100000  
22,2,1841.750000  
22,2,1665.750000  
22,2,1971.125000  
22,2,3935.500000  
22,2,3364.000000  
22,2,1548.390306  
22,2,1940.338068  
22,2,1657.619318  
22,2,1751.250000  
22,2,6844.581731  
22,2,2500.079755  
22,2,1583.788889  
22,2,1779.982456  
22,2,2275.041667  
22,2,1519.379464  
22,2,1540.000000  
22,2,1549.880435  
22,2,2322.101064  
22,2,3153.406915  
22,2,2101.357143  
22,2,1567.128205  
22,2,2114.311224  
22,2,1991.571429  
22,2,1577.712121  
22,2,1546.771277  
22,2,1975.030612  
22,2,3760.687500  
22,2,1783.242188  
22,2,2372.250000  
22,2,3228.503472  
22,2,2318.970930  
22,2,2425.827778

22,2,1499.524096  
22,2,2715.360294  
22,2,2343.760417  
22,2,1609.180147  
22,2,1518.856383  
22,2,1872.928571  
22,2,1861.488095  
22,2,1521.750000  
22,2,1651.033333  
22,2,2404.329268  
22,2,1961.593750  
22,2,2420.469388  
22,2,2451.036458  
22,2,1626.192568  
22,2,2035.951613  
22,2,1651.490385  
22,2,1689.000000  
22,2,1796.156863  
22,2,1739.082031  
22,2,1822.000000  
22,2,1909.809524  
22,2,1560.354545  
22,2,1671.164894  
22,2,6264.016129  
22,2,3764.777778  
22,2,2414.254630  
22,2,1948.307692  
22,2,4003.857143  
22,2,1880.780000  
22,2,3807.908730  
22,2,2486.610256  
22,2,4020.724432  
22,2,2658.165094  
22,2,1941.652439  
22,2,3166.850694  
22,2,5167.161184  
22,2,2639.432927  
22,2,2163.262712  
22,2,1613.078125  
22,2,1695.836538  
22,2,1636.500000  
22,2,2279.995690  
22,2,1972.387755  
22,2,2189.110577  
22,2,2231.460227  
22,2,1722.062500  
22,2,2065.625000  
22,2,1652.087500  
22,2,3853.461538  
22,2,1570.578947  
22,2,2586.250000  
22,2,2330.625000  
22,2,2231.000000  
22,2,14489.992857  
22,2,3894.161017  
22,2,3941.673469  
22,2,1862.911111  
22,2,2825.966667  
22,2,2007.808673  
22,2,2597.797619  
22,2,3028.976562  
22,2,7704.937500  
22,2,2517.829545  
22,2,2668.000000  
22,2,4355.481481  
22,2,1986.875000

22,2,1642.677326  
22,2,2839.119792  
22,2,1705.845395  
22,2,2266.957237  
22,2,1850.483333  
22,2,1784.492857  
22,2,2998.720588  
22,2,4674.423611  
22,2,2575.229730  
22,2,1735.822222  
22,2,1717.444444  
22,2,3149.764151  
22,2,1581.445312  
22,2,1847.401316  
22,2,1775.199468  
22,2,1861.825000  
22,2,1868.032738  
22,2,1986.712500  
22,2,1714.107558  
22,2,2187.425000  
22,2,4457.433673  
22,2,2601.183333  
22,2,1898.783784  
22,2,2824.830882  
22,2,15704.693548  
22,2,1554.819444  
22,2,2015.448980  
22,2,2169.567308  
22,2,2129.398649  
22,2,1596.355556  
22,2,3392.321429  
22,2,1528.333333  
22,2,2197.079268  
22,2,1547.088710  
22,2,1554.446429  
22,2,1913.558511  
22,2,2191.415816  
22,2,1523.534091  
22,2,2081.482143  
22,2,2009.422619  
22,2,1818.500000  
22,2,1509.085106  
22,2,1591.174419  
22,2,2903.990000  
22,2,10384.263158  
22,2,1596.993421  
22,2,1778.000000  
22,2,3565.454545  
22,2,3536.221154  
22,2,1802.133523  
22,2,1864.340426  
22,2,1957.500000  
22,2,1604.377358  
22,2,8387.970000  
22,2,3051.295455  
22,2,1551.392857  
22,2,1574.668478  
22,2,2840.400000  
22,2,1505.500000  
22,2,10685.140244  
22,2,1703.489796  
22,2,1611.950980  
22,2,1665.000000  
22,2,1607.936170  
22,2,2483.345000  
22,2,1515.809896

22,2,2703.533784  
22,2,1970.736979  
22,2,1501.750000  
22,2,1727.452381  
22,2,1735.355769  
22,2,1504.145833  
22,2,2353.655556  
22,2,1570.166667  
22,2,1707.680921  
22,2,1646.783163  
22,2,1511.807692  
22,2,3564.485714  
22,2,2792.625000  
22,2,1521.700000  
22,2,2380.774510  
22,2,1666.025510  
22,2,2042.660714  
22,2,1761.608491  
22,2,2207.650000  
22,2,2192.107143  
22,2,1574.809524  
22,2,1963.232143  
22,2,4073.659574  
22,2,4475.090426  
22,2,1925.806818  
22,2,4796.522727  
22,2,1595.162500  
22,2,4647.000000  
22,2,2803.796875  
22,2,2271.610294  
22,2,2383.450000  
22,2,1730.000000  
22,2,2654.531915  
22,2,2150.854651  
22,2,2014.794872  
22,2,2698.420103  
22,2,1765.807692  
22,2,1642.750000  
22,2,2088.314815  
22,2,4346.552632  
22,2,4425.146875  
22,2,1806.400000  
22,2,1515.755556  
22,2,3085.103365  
22,2,1722.171875  
22,2,2409.587719  
22,2,2073.250000  
22,2,1766.687500  
22,2,4049.548544  
22,2,6050.227500  
22,2,3322.726562  
22,2,1867.244186  
22,2,3105.604651  
22,2,3028.768293  
22,2,3471.636628  
22,2,2718.133152  
22,2,2025.577778  
22,2,1750.142442  
22,2,4583.314286  
22,2,2161.113095  
22,2,1776.200581  
22,2,2425.164216  
22,2,2401.599432  
22,2,2486.680000  
22,2,3097.655093  
22,2,1685.285714

22,2,1914.083832  
22,2,4104.596154  
22,2,3207.680000  
22,2,1600.648026  
22,2,1889.128289  
22,2,3273.346939  
22,2,5970.518293  
22,2,2531.660000  
22,2,1886.305000  
22,2,2238.222826  
22,2,2639.561111  
22,2,1765.708333  
22,2,1889.125000  
22,2,2117.777027  
22,2,2301.054545  
22,2,2918.720000  
22,2,2582.523438  
22,2,2068.258065  
22,2,2727.101415  
22,2,2504.042453  
22,2,2325.127049  
22,2,1777.978723  
22,2,2952.290094  
22,2,5816.996795  
22,2,2091.009091  
22,2,2894.000000  
22,2,2124.961538  
22,2,2813.221698  
22,2,1784.750000  
22,2,2485.225000  
22,2,2027.179878  
22,2,16691.101744  
22,2,12840.541667  
22,2,6272.095238  
22,2,6968.892857  
22,2,2390.875000  
22,2,8546.468137  
22,2,1549.353448  
22,2,2159.545455  
22,2,3677.736842  
22,2,1556.937500  
22,2,1766.109375  
22,2,2231.625000  
22,2,1984.765625  
22,2,3270.828125  
22,2,2758.317708  
22,2,2782.282609  
22,2,1975.506098  
22,2,2659.466912  
22,2,4260.010000  
22,2,1586.905660  
22,2,1712.125000  
22,2,1981.328571  
22,2,1997.528409  
22,2,1756.515152  
22,2,2722.175000  
22,2,1566.332547  
22,2,2220.301136  
22,2,2859.744444  
22,2,4271.800000  
22,2,2528.315217  
22,2,10827.018750  
22,2,1814.105978  
22,2,1554.068182  
22,2,5658.231707  
22,2,2324.280488

22,2,1621.077830  
22,2,1792.771429  
22,2,8965.976190  
22,2,1642.944149  
22,2,1710.000000  
22,2,1956.943548  
22,2,2724.585714  
22,2,3147.910000  
22,2,2480.079787  
22,2,1740.913043  
22,2,1695.340686  
22,2,2589.901163  
22,2,1722.406915  
22,2,1963.727941  
22,2,4635.810345  
22,2,2591.473404  
22,2,1529.107143  
22,2,1647.093023  
22,2,2182.905172  
22,2,3992.179641  
22,2,2577.825000  
22,2,2053.978723  
22,2,4571.800000  
22,2,6238.051887  
22,2,2785.550847  
22,2,2234.391304  
22,2,2594.957031  
22,2,1646.178571  
22,2,1782.166667  
22,2,2453.673913  
22,2,1837.000000  
22,2,4491.953704  
22,2,1759.120000  
22,2,1504.625000  
22,2,1532.625000  
22,2,2896.125000  
22,2,4280.046875  
22,2,1715.396226  
22,2,1505.036585  
22,2,1524.142857  
22,2,1619.039062  
22,2,1809.801136  
22,2,2280.855114  
22,2,1644.853659  
22,2,1593.439024  
22,2,2699.496212  
22,2,1537.263158  
22,2,1685.705000  
22,2,1660.187500  
22,2,1904.463636  
22,2,2078.625000  
22,2,1986.940341  
22,2,1659.772436  
22,2,1631.787037  
22,2,2319.708333  
22,2,1564.142857  
22,2,2546.425000  
22,2,1933.954545  
22,2,1518.843750  
22,2,4784.960784  
22,2,2015.703804  
22,2,10604.658088  
22,2,1890.744898  
22,2,10985.777778  
22,2,5763.391304  
22,2,2167.063830

22,2,1966.615385  
22,2,1915.707447  
22,2,3839.194444  
22,2,1790.937500  
22,2,1854.063953  
22,2,1841.690217  
22,2,2036.000000  
22,2,1577.338889  
22,2,2627.696809  
22,2,2027.118902  
22,2,1733.853723  
22,2,4270.316327  
22,2,3532.400000  
22,2,7253.911765  
22,2,1709.724359  
22,2,2463.205357  
22,2,1608.920918  
22,2,1678.950000  
22,2,9934.471429  
22,2,2518.710526  
22,2,1504.914894  
22,2,1505.820513  
22,2,2672.606383  
22,2,1673.723837  
22,2,1748.800000  
22,2,1820.095238  
22,2,1762.418919  
22,2,4688.828704  
22,2,2675.164975  
22,2,1621.968750  
22,2,2819.941176  
22,2,1930.120000  
22,2,3013.203704  
22,2,2488.333333  
22,2,2068.776042  
22,2,2446.032895  
22,2,2104.176471  
22,2,3391.220588  
22,2,1582.669643  
22,2,3610.567568  
22,2,8024.989583  
22,2,1768.670455  
22,2,10831.975694  
22,2,1752.304054  
22,2,1802.688889  
22,2,3469.904762  
22,2,2260.825472  
22,2,2008.630208  
22,2,1584.363636  
22,2,8351.513889  
22,2,1733.007979  
22,2,4667.926829  
22,2,2228.213953  
22,2,1926.736842  
22,2,1765.794271  
22,2,2314.812500  
22,2,2233.094697  
22,2,2364.631579  
22,2,1618.132353  
22,2,2018.366071  
22,2,3419.627232  
22,2,2730.384615  
22,2,1666.774457  
22,2,2138.279605  
22,2,12365.600000  
22,2,2101.097500

22,2,1525.025000  
22,2,3592.783333  
22,2,8593.110000  
22,2,2773.435897  
22,2,3534.598958  
22,2,1571.363636  
22,2,1958.210366  
22,2,1864.359375  
22,2,1893.458333  
22,2,1823.290698  
22,2,6547.255034  
22,2,1901.750000  
22,2,2340.204545  
22,2,2242.682500  
22,2,4805.250000  
22,2,2088.476562  
22,2,1543.081081  
22,2,1591.356707  
22,2,2239.712766  
22,2,1708.750000  
22,2,1501.000000  
22,2,1681.495000  
22,2,1998.331522  
22,2,1911.284884  
22,2,2737.363636  
22,2,1742.693182  
22,2,1501.875000  
22,2,1962.078125  
22,2,1706.265244  
22,2,2251.733333  
22,2,8181.260000  
22,2,2812.160000  
22,2,2386.701987  
22,2,2778.531977  
22,2,2621.660714  
22,2,1612.005000  
22,2,2347.418605  
22,2,1531.724490  
22,2,1748.162162  
22,2,3016.312500  
22,2,1709.311047  
22,2,1924.308824  
22,2,2007.163636  
22,2,1874.083333  
22,2,2840.670455  
22,2,1777.857143  
22,2,2279.006098  
22,2,2035.988636  
22,2,2276.666667  
22,2,1915.737245  
22,2,3343.173469  
22,2,1622.000000  
22,2,3000.520000  
22,2,3519.396226  
22,2,1822.700000  
22,2,2465.297297  
22,2,3161.232143  
22,2,1961.585366  
22,2,1813.632353  
22,2,1574.657895  
22,2,2549.615385  
22,2,2506.062500  
22,2,1783.950980  
22,2,2415.091837  
22,2,1790.807927  
22,2,1889.500000

22,2,2114.250000  
22,2,1917.632812  
22,2,1614.808824  
22,2,2569.213235  
22,2,8144.071429  
22,2,2153.308511  
22,2,3348.073529  
22,2,1683.632653  
22,2,1604.575000  
22,2,1961.601974  
22,2,2607.040816  
22,2,2276.513889  
22,2,3071.745192  
22,2,1517.397959  
22,2,7053.689189  
22,2,5917.154255  
22,2,4142.156780  
22,2,2112.005952  
22,2,1905.792453  
22,2,1519.605769  
22,2,1509.630435  
22,2,1807.559659  
22,2,1745.833333  
22,2,1654.785714  
22,2,8412.078125  
22,2,1926.183824  
22,2,2173.279762  
22,2,3385.703125  
22,2,3232.015152  
22,2,2072.159574  
22,2,1918.976351  
22,2,2333.857143  
22,2,3184.713568  
22,2,1800.038690  
22,2,2229.669643  
22,2,1788.900510  
22,2,3364.865000  
22,2,1710.027027  
22,2,7573.342105  
22,2,1710.833333  
22,2,2010.010870  
22,2,2878.877604  
22,2,2255.643750  
22,2,1728.378378  
22,2,2536.763158  
22,2,1741.850000  
22,2,2113.090909  
22,2,1697.012019  
22,2,1709.797727  
22,2,6022.480769  
22,2,2946.859091  
22,2,2814.986607  
22,2,1833.302083  
22,2,1994.145349  
22,2,1836.545455  
22,2,2387.187500  
22,2,2417.738208  
22,2,1804.752551  
22,2,1678.755435  
22,2,1529.225000  
22,2,2127.261364  
22,2,4775.287500  
22,2,3138.068452  
22,2,1657.063830  
22,2,2775.989362  
22,2,18029.331522

22,2,3397.833333  
22,2,2305.534091  
22,2,1520.396226  
22,2,1552.241477  
22,2,1570.604651  
22,2,4859.906250  
22,2,2028.573864  
22,2,2121.926471  
22,2,2591.229592  
22,2,2814.156250  
22,2,2079.125000  
22,2,2150.512755  
22,2,17683.039216  
22,2,3141.450000  
22,2,1825.717391  
22,2,1939.900510  
22,2,1548.028846  
22,2,7293.176282  
22,2,2401.009615  
22,2,2755.141447  
22,2,3690.781780  
22,2,1884.233696  
22,2,1547.427673  
22,2,1777.732500  
22,2,1857.630319  
22,2,8425.083333  
22,2,1636.568878  
22,2,1623.500000  
22,2,2931.817073  
22,2,2094.979167  
22,2,2023.745192  
22,2,1818.364865  
22,2,2124.837719  
22,2,2174.223214  
22,2,1628.712500  
22,2,2708.015957  
22,2,2032.303191  
22,2,6082.470395  
22,2,1852.576087  
22,2,2155.200000  
22,2,2352.932432  
22,2,1762.456633  
22,2,1667.794271  
22,2,2313.275000  
22,2,4250.510870  
22,2,2931.983333  
22,2,1980.104167  
22,2,2014.588235  
22,2,3408.529018  
22,2,1860.664286  
22,2,1591.228125  
22,2,1588.750000  
22,2,1818.769886  
22,2,2659.222222  
22,2,4179.326923  
22,2,1565.580838  
22,2,2054.639344  
22,2,2606.574519  
22,2,1818.203125  
22,2,1787.860849  
22,2,1591.625000  
22,2,1605.092105  
22,2,1583.535714  
22,2,1534.657407  
22,2,1620.722561  
22,2,17894.044444

22,2,1847.106383  
22,2,2573.399038  
22,2,2795.440000  
22,2,2812.536111  
22,2,1513.507812  
22,2,1572.023810  
22,2,2189.467593  
22,2,2366.785714  
22,2,1947.381356  
22,2,4176.762931  
22,2,4413.602679  
22,2,3627.981707  
22,2,4761.877315  
22,2,3654.000000  
22,2,2372.210938  
22,2,3130.370455  
22,2,3862.433333  
22,2,2039.934783  
22,2,3585.687500  
22,2,3218.825000  
22,2,1831.263158  
22,2,2250.316327  
22,2,2510.744681  
22,2,2377.116477  
22,2,1589.584184  
22,2,1569.471875  
22,2,3264.500000  
22,2,1987.833333  
22,2,1850.845395  
22,2,2489.397321  
22,2,6754.270833  
22,2,2272.000000  
22,2,3091.348958  
22,2,1676.882682  
22,2,2763.018868  
22,2,2988.500000  
22,2,2391.756579  
22,2,1535.958333  
22,2,1714.316327  
22,2,2864.929032  
22,2,2074.804545  
22,2,2058.200000  
22,2,1880.033333  
22,2,2233.543269  
22,2,2445.847458  
22,2,3004.344512  
22,2,1976.119792  
22,2,5048.400000  
22,2,9394.237805  
22,2,1537.465116  
22,2,1499.695513  
22,2,1705.744681  
22,2,3328.162791  
22,2,1516.484375  
22,2,2467.343750  
22,2,1806.481383  
22,2,2653.607955  
22,2,2579.276596  
22,2,2828.010204  
22,2,1530.350490  
22,2,2432.250000  
22,2,2609.375000  
22,2,1818.139423  
22,2,2083.190476  
22,2,1589.343750  
22,2,2318.586047

22,2,3554.333333  
22,2,2705.454545  
22,2,2412.451705  
22,2,1879.250000  
22,2,1563.656250  
22,2,1992.535714  
22,2,2340.422872  
22,2,1541.342857  
22,2,1598.300000  
22,2,2342.500000  
22,2,2244.048951  
22,2,3205.072222  
22,2,1702.294872  
22,2,2126.608871  
22,2,5279.437500  
22,2,1990.279070  
22,2,5870.047794  
22,2,1509.428571  
22,2,3062.960938  
22,2,1502.232955  
22,2,4419.671053  
22,2,2099.323370  
22,2,2325.448718  
22,2,7195.544643  
22,2,2609.659091  
22,2,2142.062500  
22,2,1632.206897  
22,2,1928.204082  
22,2,1755.875000  
22,2,1541.910256  
22,2,1778.312500  
22,2,1511.400000  
22,2,1558.588235  
22,2,2015.793981  
22,2,4240.245614  
22,2,1582.857143  
22,2,3387.750000  
22,2,2410.750000  
22,2,2502.867925  
22,2,6512.971014  
22,2,2879.208333  
22,2,3059.923567  
22,2,1865.000000  
22,2,2405.310811  
22,2,2298.632653  
22,2,3314.062500  
22,2,6637.897959  
22,2,1736.659574  
22,2,1502.132653  
22,2,1732.500000  
22,2,7420.065789  
22,2,2019.130208  
22,2,5248.312500  
22,2,2291.073864  
22,2,1750.923469  
22,2,2543.940476  
22,2,1533.446078  
22,2,1510.391304  
22,2,1609.600000  
22,2,1546.258929  
22,2,8045.804878  
22,2,4985.933333  
22,2,1785.875000  
22,2,1520.071875  
22,2,1910.997449  
22,2,1529.125000

22,2,1922.143519  
22,2,3517.311475  
22,2,1889.791667  
22,2,11048.114130  
22,2,6003.291667  
22,2,3925.279070  
22,2,3632.131579  
22,2,4416.584906  
22,2,2217.622159  
22,2,2017.098404  
22,2,2217.161290  
22,2,1781.441176  
22,2,1810.690789  
22,2,1712.002976  
22,2,1920.406977  
22,2,2047.662879  
22,2,1544.544643  
22,2,2214.250000  
22,2,1600.764706  
22,2,2017.069712  
22,2,1763.375000  
22,2,1973.349057  
22,2,1882.837209  
22,2,4360.364865  
22,2,1642.677326  
22,2,2585.476562  
22,2,2669.697674  
22,2,1865.307500  
22,2,1541.369792  
22,2,1560.560976  
22,2,2378.246212  
22,2,1773.346154  
22,2,1586.791667  
22,2,1940.926829  
22,2,2466.062500  
22,2,2961.288889  
22,2,1513.058511  
22,2,5540.739362  
22,2,3722.076923  
22,2,2578.000000  
22,2,1890.650510  
22,2,2006.026961  
22,2,1941.707547  
22,2,4182.803571  
22,2,2362.986111  
22,2,1769.171875  
22,2,3790.000000  
22,2,6066.485000  
22,2,4885.174528  
22,2,2502.979545  
22,2,8585.436170  
22,2,2277.000000  
22,2,4662.457500  
22,2,1616.389151  
22,2,2322.783784  
22,2,2524.073171  
22,2,2366.443452  
22,2,3810.803571  
22,2,4123.208333  
22,2,2076.905612  
22,2,3823.035088  
22,2,2021.433333  
22,2,1519.151596  
22,2,1660.588235  
22,2,1998.921053  
22,2,1622.263889

22,2,2059.672414  
22,2,2254.427083  
22,2,1735.676471  
22,2,2397.879464  
22,2,1822.671296  
22,2,2017.553571  
22,2,1829.845395  
22,2,2416.024390  
22,2,2131.333333  
22,2,2005.134868  
22,2,1581.666667  
22,2,1586.511111  
22,2,2771.255814  
22,2,1908.400000  
22,2,6378.839286  
22,2,1806.434783  
22,2,1663.938776  
22,2,2151.635135  
22,2,2356.333333  
22,2,1499.611413  
22,2,5191.050000  
22,2,1545.700000  
22,2,1664.544643  
22,2,2188.423077  
22,2,2015.150000  
22,2,2142.562500  
22,2,1937.926471  
22,2,1500.153846  
22,2,2344.462766  
22,2,2112.922297  
22,2,1810.892857  
22,2,1754.479592  
22,2,1953.531250  
22,2,1530.076220  
22,2,8549.851190  
22,2,6672.665094  
22,2,1876.421875  
22,2,1783.345930  
22,2,1560.925532  
22,2,4083.881356  
22,2,1770.944444  
22,2,2268.031977  
22,2,1558.346354  
22,2,2120.553191  
22,2,2479.523256  
22,2,8363.275000  
22,2,1716.555085  
22,2,4750.483696  
22,2,1801.977941  
22,2,2556.637500  
22,2,1774.538462  
22,2,1499.428571  
22,2,4114.326923  
22,2,1666.621711  
22,2,3831.939189  
22,2,1983.582500  
22,2,2338.223404  
22,2,1819.787500  
22,2,3022.928571  
22,2,2896.042857  
22,2,2932.864796  
22,2,1830.500000  
22,2,1507.281250  
22,2,1699.510638  
22,2,3467.283333  
22,2,1915.437500

22,2,2541.164634  
22,2,2793.000000  
22,2,2085.733974  
22,2,2181.038462  
22,2,1835.625000  
22,2,1666.707031  
22,2,1854.673469  
22,2,3065.040541  
22,2,1833.355556  
22,2,2921.027778  
22,2,3660.607955  
22,2,2062.125000  
22,2,2549.929878  
22,2,1740.568182  
22,2,1824.412234  
22,2,3192.338235  
22,2,1601.708333  
22,2,1874.428571  
22,2,1685.253289  
22,2,1817.553191  
22,2,2085.752660  
22,2,1544.812500  
22,2,1846.313953  
22,2,2751.989796  
22,2,3048.337209  
22,2,2174.313636  
22,2,1541.007353  
22,2,3441.545918  
22,2,1975.456250  
22,2,1847.573171  
22,2,2100.509146  
22,2,2689.722222  
22,2,2109.671875  
22,2,1518.383929  
22,2,1783.000000  
22,2,2231.250000  
22,2,1507.125000  
22,2,1679.179878  
22,2,1952.729167  
22,2,3496.888889  
22,2,5013.160714  
22,2,1973.577889  
22,2,1504.681818  
22,2,1873.447115  
22,2,2285.548246  
22,2,2884.055000  
22,2,2192.038043  
22,2,1796.250000  
22,2,1606.430921  
22,2,1521.180851  
22,2,1924.043605  
22,2,2613.661058  
22,2,1638.756757  
22,2,2160.226562  
22,2,3612.839286  
22,2,1912.454545  
22,2,1509.103659  
22,2,1620.396341  
22,2,1589.042683  
22,2,2133.197727  
22,2,1649.771739  
22,2,1654.218750  
22,2,2766.065104  
22,2,1813.821990  
22,2,1843.583333  
22,2,2483.287500

22,2,10269.724432  
22,2,2877.937500  
22,2,1975.350962  
22,2,1541.671875  
22,2,2674.718750  
22,2,5730.556452  
22,2,10647.775000  
22,2,3111.027027  
22,2,1725.824468  
22,2,2038.863636  
22,2,2479.942308  
22,2,2287.016949  
22,2,3441.073171  
22,2,1589.110465  
22,2,3031.269231  
22,2,1685.162162  
22,2,2166.890244  
22,2,2893.392857  
22,2,4229.250000  
22,2,2204.752604  
22,2,1966.250000  
22,2,1942.454545  
22,2,8533.570312  
22,2,1655.459239  
22,2,1618.769231  
22,2,2008.909091  
22,2,4425.966463  
22,2,2083.756098  
22,2,1745.285714  
22,2,1868.113889  
22,2,2180.522222  
22,2,3341.428571  
22,2,2048.975000  
22,2,2390.676829  
22,2,1962.207317  
22,2,1614.004310  
22,2,2747.933962  
22,2,2605.461538  
22,2,2254.714286  
22,2,3515.444444  
22,2,1563.372549  
22,2,2415.889205  
22,2,6155.954545  
22,2,1624.898438  
22,2,1616.100000  
22,2,3168.493902  
22,2,1838.547486  
22,2,1830.125000  
22,2,1920.892857  
22,2,2013.687500  
22,2,3847.359375  
22,2,2187.898256  
22,2,2300.237805  
22,2,2153.141892  
22,2,1571.029412  
22,2,2095.333333  
22,2,1855.206818  
22,2,2007.455882  
22,2,3179.028846  
22,2,3183.137195  
22,2,2365.956522  
22,2,2137.566176  
22,2,1735.631250  
22,2,1951.650000  
22,2,2529.502155  
22,2,2360.705000

22,2,3210.294118  
22,2,1772.477273  
22,2,1702.120000  
22,2,1816.710526  
22,2,1671.096154  
22,2,2360.560976  
22,2,3312.474432  
22,2,2694.875000  
22,2,1633.142857  
22,2,4665.664773  
22,2,2062.559211  
22,2,1684.213942  
22,2,2971.636628  
22,2,1913.613889  
22,2,1884.029255  
22,2,1766.050000  
22,2,1750.343023  
22,2,2177.409375  
22,2,2319.950980  
22,2,1698.784091  
22,2,1553.786184  
22,2,2078.096154  
22,2,7064.117647  
22,2,1879.666667  
22,2,2650.856250  
22,2,3117.831081  
22,2,1590.191667  
22,2,2888.007500  
22,2,2066.333333  
22,2,1510.210227  
22,2,2555.787500  
22,2,8681.460526  
22,2,1836.037037  
22,2,1533.688889  
22,2,1584.777778  
22,2,2303.562500  
22,2,1507.168367  
22,2,3116.016667  
22,2,2770.072368  
22,2,1852.728070  
22,2,1914.182692  
22,2,1603.000000  
22,2,1792.916667  
22,2,1899.500000  
22,2,3482.209302  
22,2,2191.468085  
22,2,3432.487437  
22,2,2292.125000  
22,2,1876.678571  
22,2,2753.111111  
22,2,1774.591667  
22,2,1972.302632  
22,2,1872.722826  
22,2,1964.487500  
22,2,1609.393229  
22,2,1641.310160  
22,2,2093.693750  
22,2,1633.845238  
22,2,7065.611111  
22,2,1899.500000  
22,2,3435.221154  
22,2,2373.000000  
22,2,1939.782500  
22,2,1918.304054  
22,2,2022.548077  
22,2,1776.035326

22,2,2511.500000  
22,2,3440.514706  
22,2,1685.488889  
22,2,2170.617647  
22,2,2605.331395  
22,2,2136.528846  
22,2,1572.052083  
22,2,3207.696078  
22,2,1715.415698  
22,2,2421.116279  
22,2,1795.038462  
22,2,2832.075472  
22,2,1634.054348  
22,2,3513.410714  
22,2,2042.000000  
22,2,3610.505682  
22,2,2336.451220  
22,2,14893.502717  
22,2,1888.854167  
22,2,2024.709184  
22,2,2168.816667  
22,2,3566.913043  
22,2,1636.723404  
22,2,1730.625000  
22,2,2009.575758  
22,2,3633.969595  
22,2,2241.178571  
22,2,1788.195000  
22,2,1531.242188  
22,2,8002.816667  
22,2,2230.742424  
22,2,3324.456522  
22,2,1891.164773  
22,2,2363.021277  
22,2,1660.925000  
22,2,1885.246875  
22,2,1696.630435  
22,2,1645.000000  
22,2,1641.978774  
22,2,1914.621622  
22,2,2454.243243  
22,2,2337.916667  
22,2,4504.670139  
22,2,1747.901786  
22,2,3902.610169  
22,2,6355.897959  
22,2,1546.390625  
22,2,1691.837209  
22,2,2040.510638  
22,2,2427.970588  
22,2,2216.813725  
22,2,2032.893939  
22,2,2458.392045  
22,2,2666.165563  
22,2,2902.781250  
22,2,3639.551020  
22,2,3567.161458  
22,2,1956.144444  
22,2,6490.755556  
22,2,1837.607143  
22,2,2438.500000  
22,2,19070.062500  
22,2,1753.682927  
22,2,1901.595745  
22,2,2317.931122  
22,2,2545.225806

22,2,2652.421875  
22,2,4157.729167  
22,2,2708.733333  
22,2,1514.000000  
22,2,1731.954545  
22,2,1866.365385  
22,2,8614.031250  
22,2,2273.046875  
22,2,1908.233491  
22,2,2411.310976  
22,2,5343.223558  
22,2,1526.562500  
22,2,2342.866279  
22,2,7057.775641  
22,2,1783.352041  
22,2,1635.187500  
22,2,1773.294643  
22,2,2195.409483  
22,2,2216.500000  
22,2,1724.392442  
22,2,2069.829268  
22,2,3364.816176  
22,2,2739.104592  
22,2,1723.441038  
22,2,1588.541667  
22,2,1609.837500  
22,2,2533.597826  
22,2,1525.779762  
22,2,1630.598540  
22,2,5645.868966  
22,2,1687.375000  
22,2,2014.833333  
22,2,1505.988024  
22,2,2192.400000  
22,2,1957.013393  
22,2,3218.718023  
22,2,1863.035714  
22,2,2265.466346  
22,2,1923.466667  
22,2,4297.444444  
22,2,2076.560811  
22,2,1713.293194  
22,2,1549.744681  
22,2,2720.125000  
22,2,2677.712963  
22,2,1849.161290  
22,2,2956.315789  
22,2,1536.508333  
22,2,1508.165000  
22,2,5178.985294  
22,2,1891.736842  
22,2,1569.532609  
22,2,1899.100000  
22,2,2473.837838  
22,2,1654.259375  
22,2,1954.058824  
22,2,1825.611429  
22,2,1995.775785  
22,2,1847.516129  
22,2,1900.367188  
22,2,1510.789474  
22,2,2652.877660  
22,2,4309.877500  
22,2,1755.666667  
22,2,3408.214286  
22,2,1646.592262

22,2,1733.928571  
22,2,1952.750000  
22,2,2064.564103  
22,2,1785.375000  
22,2,1807.429687  
22,2,1509.795031  
22,2,3119.067073  
22,2,3762.045000  
22,2,1552.612245  
22,2,3224.393617  
22,2,1843.584559  
22,2,6876.345109  
22,2,1886.858796  
22,2,1522.513889  
22,2,1757.069767  
22,2,8055.621795  
22,2,2422.534314  
22,2,1829.375000  
22,2,1904.585366  
22,2,2084.825581  
22,2,1976.540698  
22,2,1509.782609  
22,2,1849.882353  
22,2,1752.048246  
22,2,2070.662500  
22,2,1996.490566  
22,2,1860.933140  
22,2,2799.107955  
22,2,4517.450292  
22,2,2304.625000  
22,2,2632.046512  
22,2,1802.885870  
22,2,1927.219340  
22,2,1597.352273  
22,2,3015.687500  
22,2,1978.410326  
22,2,1887.169811  
22,2,1669.867647  
22,2,2203.618421  
22,2,2249.272222  
22,2,1862.771226  
22,2,2499.505319  
22,2,1625.064103  
22,2,2998.209302  
22,2,1692.039474  
22,2,9335.493421  
22,2,3350.885135  
22,2,1983.485294  
22,2,2401.863095  
22,2,6044.018293  
22,2,8944.215116  
22,2,2011.187500  
22,2,1798.502500  
22,2,1706.397959  
22,2,1726.014535  
22,2,2862.394737  
22,2,1643.665698  
22,2,3250.562500  
22,2,3511.622340  
22,2,2477.232639  
22,2,1857.554878  
22,2,1649.145455  
22,2,2547.385000  
22,2,4400.982143  
22,2,1543.275000  
22,2,2122.267857

22,2,3430.121875  
22,2,1905.476744  
22,2,2743.695755  
22,2,3802.214286  
22,2,3913.083333  
22,2,2273.037234  
22,2,1758.579545  
22,2,1908.191489  
22,2,1512.190104  
22,2,2769.401042  
22,2,1565.926829  
22,2,1672.300000  
22,2,2907.370370  
22,2,1589.403941  
22,2,4874.283333  
22,2,1996.851190  
22,2,1589.437500  
22,2,19702.714286  
22,2,2618.416667  
22,2,1532.129630  
22,2,3119.539352  
22,2,1718.921569  
22,2,2067.632653  
22,2,2037.702128  
22,2,6199.005556  
22,2,6655.487069  
22,2,2118.450000  
22,2,2072.261905  
22,2,1535.305233  
22,2,2566.965000  
22,2,1667.375000  
22,2,1572.357143  
22,2,1783.400000  
22,2,1717.206633  
22,2,1927.496622  
22,2,1661.226974  
22,2,2760.256757  
22,2,6397.127551  
22,2,2099.289894  
22,2,2462.646277  
22,2,1849.806604  
22,2,3367.165541  
22,2,2185.828947  
22,2,1896.687500  
22,2,3595.500000  
22,2,2026.845238  
22,2,1863.937500  
22,2,2257.071429  
22,2,1648.733333  
22,2,1941.950000  
22,2,1619.000000  
22,2,1512.768229  
22,2,2467.650943  
22,2,1645.223214  
22,2,1605.393617  
22,2,2633.151042  
22,2,4029.668367  
22,2,1547.843750  
22,2,2085.944149  
22,2,7904.286765  
22,2,8405.941176  
22,2,1589.765625  
22,2,1802.703125  
22,2,1979.959239  
22,2,3007.485714  
22,2,2049.547414

22,2,1646.833333  
22,2,1582.351351  
22,2,1546.027778  
22,2,2757.219388  
22,2,2151.323529  
22,2,1713.333333  
22,2,1532.740132  
22,2,1633.204787  
22,2,2036.844512  
22,2,2223.355769  
22,2,2691.250000  
22,2,1821.732143  
22,2,1751.053191  
22,2,3904.250000  
22,2,12866.934211  
22,2,1650.023256  
22,2,2077.279070  
22,2,2651.375000  
22,2,1512.200000  
22,2,1820.337054  
22,2,2560.168919  
22,2,1615.032609  
22,2,2317.985849  
22,2,2611.922222  
22,2,2270.122449  
22,2,5076.414894  
22,2,1591.505814  
22,2,2179.152778  
22,2,2944.817308  
22,2,1943.394737  
22,2,2714.397727  
22,2,2116.550000  
22,2,4088.944079  
22,2,2508.729167  
22,2,1898.210526  
22,2,2009.352273  
22,2,2084.489796  
22,2,2434.242021  
22,2,2882.643617  
22,2,2348.413690  
22,2,2141.875000  
22,2,1535.418605  
22,2,2424.194444  
22,2,2643.343750  
22,2,2432.125000  
22,2,7401.500000  
22,2,2563.409483  
22,2,1591.348837  
22,2,2020.533333  
22,2,1777.500000  
22,2,2805.778846  
22,2,1975.709091  
22,2,1635.183824  
22,2,3148.765306  
22,2,1889.881250  
22,2,3227.096154  
22,2,1623.665816  
22,2,2173.278409  
22,2,2570.959302  
22,2,2460.780000  
22,2,1575.192073  
22,2,2062.259259  
22,2,1663.651786  
22,2,1651.378378  
22,2,2199.097561  
22,2,2031.642857

22,2,2982.882500  
22,2,2178.158537  
22,2,3856.246324  
22,2,1523.408537  
22,2,2142.676829  
22,2,2381.307692  
22,2,2521.190217  
22,2,2300.750000  
22,2,3086.203704  
22,2,2395.489583  
22,2,2916.655556  
22,2,1931.825000  
22,2,2276.857143  
22,2,4997.175000  
22,2,1561.822222  
22,2,1608.074074  
22,2,2236.690476  
22,2,1715.935714  
22,2,1932.875000  
22,2,2372.504167  
22,2,1975.755814  
22,2,1977.705128  
22,2,1623.333333  
22,2,1639.656915  
22,2,1866.666667  
22,2,1752.577206  
22,2,1852.411458  
22,2,2247.832500  
22,2,2350.707317  
22,2,2258.892857  
22,2,2317.708333  
22,2,1608.184524  
22,2,1604.185811  
22,2,1614.000000  
22,2,3431.631579  
22,2,3781.920635  
22,2,2205.226852  
22,2,3189.679487  
22,2,2877.858491  
22,2,1947.103659  
22,2,2144.150000  
22,2,1589.724490  
22,2,3034.666667  
22,2,2037.456522  
22,2,5111.258333  
22,2,2284.497449  
22,2,2402.072115  
22,2,2431.019022  
22,2,3084.925926  
22,2,2309.125000  
22,2,2618.680851  
22,2,3234.218750  
22,2,1628.525000  
22,2,3492.312500  
22,2,2229.125000  
22,2,1755.490000  
22,2,1554.375000  
22,2,15342.500000  
22,2,3433.212766  
22,2,2776.864362  
22,2,5127.590426  
22,2,1674.420455  
22,2,1506.391304  
22,2,2100.786585  
22,2,3704.912162  
22,2,3156.924342

22,2,2128.417763  
22,2,2326.512195  
22,2,1937.000000  
22,2,1547.296296  
22,2,1516.517361  
22,2,2169.375000  
22,2,1515.474490  
22,2,2496.700000  
22,2,3003.351852  
22,2,1556.640625  
22,2,14505.761905  
22,2,1619.081250  
22,2,1768.594595  
22,2,2588.609375  
22,2,1728.156250  
22,2,3346.125000  
22,2,2325.063953  
22,2,1517.669811  
22,2,1956.142857  
22,2,1571.806604  
22,2,2287.473404  
22,2,1571.961735  
22,2,5371.325000  
22,2,1952.014706  
22,2,3488.981818  
22,2,3065.276596  
22,2,2247.180233  
22,2,3120.468750  
22,2,2026.554878  
22,2,2692.902174  
22,2,1689.069444  
22,2,1597.356771  
22,2,1755.086806  
22,2,2374.700000  
22,2,2504.474576  
22,2,4320.978571  
22,2,1679.375000  
22,2,1705.954545  
22,2,1681.000000  
22,2,3985.051020  
22,2,9733.974576  
22,2,2239.590909  
22,2,1914.380682  
22,2,2963.732143  
22,2,2517.402500  
22,2,2961.180851  
22,2,1801.828947  
22,2,1531.243243  
22,2,1589.393229  
22,2,1637.472727  
22,2,4704.186047  
22,2,2528.436170  
22,2,1808.100000  
22,2,7611.657895  
22,2,4065.433594  
22,2,1854.236111  
22,2,1540.723404  
22,2,1604.868421  
22,2,2655.518293  
22,2,1591.716146  
22,2,2186.900000  
22,2,2218.324468  
22,2,1654.228723  
22,2,1522.436170  
22,2,1811.300000  
22,2,3065.585106

22,2,3521.747396  
22,2,3735.102273  
22,2,1700.178571  
22,2,2734.375000  
22,2,2203.864865  
22,2,2651.000000  
22,2,2655.545455  
22,2,2216.214286  
22,2,2121.771341  
22,2,2234.850543  
22,2,10954.275000  
22,2,2436.057692  
22,2,2855.129545  
22,2,1851.080000  
22,2,7393.699219  
22,2,1966.245833  
22,2,2074.059524  
22,2,2712.400000  
22,2,4241.145349  
22,2,5026.431452  
22,2,1540.777174  
22,2,2253.129032  
22,2,1769.400000  
22,2,1503.364865  
22,2,4688.750000  
22,2,1624.860119  
22,2,2246.341837  
22,2,1514.776442  
22,2,1609.010714  
22,2,2260.358491  
22,2,2984.951220  
22,2,1507.583333  
22,2,2126.808511  
22,2,2972.947500  
22,2,1809.209906  
22,2,2106.147727  
22,2,2060.592262  
22,2,5703.625000  
22,2,1521.407609  
22,2,2024.268293  
22,2,1836.707447  
22,2,3352.972222  
22,2,1669.666667  
22,2,2125.375000  
22,2,2872.782609  
22,2,2367.125000  
22,2,2491.326531  
22,2,3489.769397  
22,2,2204.596154  
22,2,1753.121951  
22,2,17958.625000  
22,2,1983.750000  
22,2,1959.506098  
22,2,1793.771277  
22,2,1864.450000  
22,2,1723.768293  
22,2,4504.071429  
22,2,3952.105263  
22,2,2038.568750  
22,2,2236.604167  
22,2,1569.657895  
22,2,1823.676630  
22,2,2174.093750  
22,2,3110.369898  
22,2,1787.514706  
22,2,2533.598214

22,2,2694.421687  
22,2,1968.024390  
22,2,3485.032895  
22,2,1584.681122  
22,2,1844.451705  
22,2,2915.566406  
22,2,4209.562500  
22,2,2682.127660  
22,2,3072.378049  
22,2,2086.191489  
22,2,1955.058333  
22,2,1525.279605  
22,2,2174.925000  
22,2,2737.816038  
22,2,1730.007576  
22,2,1840.358974  
22,2,3007.958333  
22,2,1736.929688  
22,2,1543.089674  
22,2,2715.111364  
22,2,1671.237500  
22,2,3520.921875  
22,2,1587.039216  
22,2,1555.100000  
22,2,15391.478261  
22,2,4018.737500  
22,2,5242.872340  
22,2,4628.640625  
22,2,1553.167553  
22,2,1997.500000  
22,2,1735.648256  
22,2,2692.882500  
22,2,2357.000000  
22,2,1561.014205  
22,2,2904.825000  
22,2,1923.416667  
22,2,2011.018293  
22,2,3091.154255  
22,2,2082.439024  
22,2,1635.492647  
22,2,1783.717391  
22,2,2702.889706  
22,2,3742.004310  
22,2,3052.062500  
22,2,1829.392857  
22,2,2770.621429  
22,2,10572.375000  
22,2,3948.329787  
22,2,2754.686047  
22,2,3186.897059  
22,2,7002.588235  
22,2,2459.709302  
22,2,2137.571429  
22,2,3214.153646  
22,2,1860.000000  
22,2,2190.958333  
22,2,1710.775510  
22,2,2316.770000  
22,2,2735.239865  
22,2,1569.200000  
22,2,2345.049479  
22,2,1764.177083  
22,2,2316.675926  
22,2,2735.241071  
22,2,2412.563830  
22,2,1622.196023

22,2,1538.041667  
22,2,2416.101064  
22,2,5732.250000  
22,2,1552.358974  
22,2,2688.338235  
22,2,9368.836207  
22,2,2198.676887  
22,2,2171.654255  
22,2,1585.562500  
22,2,1504.684211  
22,2,1678.267857  
22,2,4073.316667  
22,2,3775.875000  
22,2,2117.000000  
22,2,3284.336538  
22,2,2349.345930  
22,2,1562.760870  
22,2,3601.508523  
22,2,2053.043478  
22,2,1571.918919  
22,2,1572.673469  
22,2,4428.857143  
22,2,2261.166667  
22,2,1897.961538  
22,2,2545.526163  
22,2,1744.890000  
22,2,3631.398026  
22,2,1751.715426  
22,2,1889.303571  
22,2,3265.610619  
22,2,5433.320312  
22,2,1566.222222  
22,2,2248.353125  
22,2,2007.093750  
22,2,1836.515152  
22,2,1669.775424  
22,2,1619.650000  
22,2,2612.850610  
22,2,1911.986842  
22,2,1697.025641  
22,2,1653.070000  
22,2,1724.813679  
22,2,2683.177778  
22,2,1590.614130  
22,2,1982.757812  
22,2,6999.613208  
22,2,1571.711111  
22,2,2696.740000  
22,2,1823.558824  
22,2,5966.520833  
22,2,3929.011905  
22,2,2062.266509  
22,2,1580.153409  
22,2,2052.000000  
22,2,1852.753049  
22,2,1880.586957  
22,2,1648.948529  
22,2,1711.752907  
22,2,1860.437500  
22,2,3028.059783  
22,2,1721.500000  
22,2,5576.115000  
22,2,2559.453488  
22,2,10054.269737  
22,2,1534.635000  
22,2,1757.984293

22,2,2409.030660  
22,2,1592.500000  
22,2,1942.589286  
22,2,1956.235000  
22,2,1999.654412  
22,2,2830.876923  
22,2,2459.548469  
22,2,1828.875000  
22,2,1602.223214  
22,2,16495.012500  
22,2,1534.815972  
22,2,1619.531250  
22,2,1531.121528  
22,2,1544.812500  
22,2,9587.059375  
22,2,1838.210526  
22,2,2114.161932  
22,2,3629.375000  
22,2,2456.360294  
22,2,2179.443750  
22,2,2289.789062  
22,2,1742.854545  
22,2,1906.930233  
22,2,2233.636364  
22,2,6402.402273  
22,2,1663.011364  
22,2,4245.054688  
22,2,1634.955882  
22,2,3036.272727  
22,2,1683.462963  
22,2,3634.740909  
22,2,1609.172414  
22,2,1588.187500  
22,2,14455.294118  
22,2,3007.848039  
22,2,3322.890000  
22,2,2501.097561  
22,2,1660.937500  
22,2,1920.357558  
22,2,2072.867925  
22,2,2347.574405  
22,2,1586.128205  
22,2,4210.723558  
22,2,3512.442308  
22,2,3275.245098  
22,2,7928.878049  
22,2,3908.721154  
22,2,3908.938776  
22,2,1591.125000  
22,2,2903.691176  
22,2,2376.576142  
22,2,2825.625000  
22,2,2337.957317  
22,2,2828.780220  
22,2,2824.812500  
22,2,2392.383333  
22,2,4037.467391  
22,2,1664.445122  
22,2,1952.584459  
22,2,3006.245283  
22,2,4064.937500  
22,2,1999.236842  
22,2,2246.343195  
22,2,1704.300000  
22,2,4744.144231  
22,2,5836.003125

22,2,1949.775510  
22,2,4067.352941  
22,2,3171.448276  
22,2,1786.531250  
22,2,16730.513021  
22,2,2119.677885  
22,2,3544.405556  
22,2,1888.892857  
22,2,1535.162791  
22,2,1627.536585  
22,2,2435.022222  
22,2,1660.428571  
22,2,3461.494681  
22,2,1778.040541  
22,2,3282.865854  
22,2,2147.520710  
22,2,2619.375000  
22,2,3581.771739  
22,2,1714.555288  
22,2,2618.784574  
22,2,1731.488372  
22,2,2595.500000  
22,2,1738.184783  
22,2,2692.521739  
22,2,4365.000000  
22,2,1554.181818  
22,2,3255.540816  
22,2,1760.394231  
22,2,1642.759777  
22,2,2826.285714  
22,2,1552.514706  
22,2,1561.839286  
22,2,1849.677083  
22,2,1541.023649  
22,2,2186.086957  
22,2,1698.312500  
22,2,3235.216080  
22,2,1891.703125  
22,2,3768.932292  
22,2,1878.364130  
22,2,2102.064655  
22,2,9283.666667  
22,2,15867.600000  
22,2,3616.337500  
22,2,2326.180556  
22,2,1952.663462  
22,2,1653.449324  
22,2,1501.606707  
22,2,1688.162736  
22,2,1569.569444  
22,2,2939.085937  
22,2,1557.851064  
22,2,1858.713415  
22,2,2134.425532  
22,2,1785.650000  
22,2,1652.333333  
22,2,1761.500000  
22,2,1705.163462  
22,2,2376.697115  
22,2,1782.274457  
22,2,1938.804878  
22,2,1805.210526  
22,2,1676.291667  
22,2,2359.188889  
22,2,2351.395833  
22,2,3080.169811

22,2,1635.200000  
22,2,1685.183594  
22,2,1754.427632  
22,2,2028.059783  
22,2,3705.210106  
22,2,1920.500000  
22,2,1731.903846  
22,2,2402.776163  
22,2,1668.255319  
22,2,3152.428571  
22,2,1688.714286  
22,2,2040.125000  
22,2,1973.512255  
22,2,10114.996094  
22,2,1871.000000  
22,2,2460.473684  
22,2,2385.569444  
22,2,2382.426136  
22,2,1943.218750  
22,2,1567.269737  
22,2,1833.644444  
22,2,1920.053922  
22,2,2238.795000  
22,2,1626.300000  
22,2,1940.158537  
22,2,1566.403061  
22,2,1773.584375  
22,2,2566.783019  
22,2,2994.384146  
22,2,1714.040441  
23,1,1514.395349  
23,1,1721.753378  
23,1,3487.348485  
23,1,9032.608696  
23,1,13544.383929  
23,1,9237.953947  
23,1,10083.090909  
23,1,1777.228261  
23,1,2695.868421  
23,1,11581.335227  
23,1,2753.302885  
23,1,5726.742857  
23,1,4717.022727  
23,1,13895.480978  
23,1,1895.115385  
23,1,2825.107143  
23,1,2058.363636  
23,1,3058.848485  
23,1,4282.093750  
23,1,4988.458333  
23,1,2679.169643  
23,1,5354.107143  
23,1,17753.320122  
23,1,5460.432927  
23,1,2675.312500  
23,1,16722.571429  
23,1,13515.306122  
23,1,5688.333333  
23,1,2716.496622  
23,1,2127.125000  
23,1,4866.500000  
23,1,2030.750000  
23,1,1527.560976  
23,1,3174.950000  
23,1,3634.807692  
23,1,8709.303030

23,1,11631.000000  
23,1,1626.267857  
23,1,8092.319149  
23,1,10008.642857  
23,1,3253.107143  
23,1,13992.976562  
23,1,7483.610294  
23,1,10280.797794  
23,1,1588.585366  
23,1,1694.142857  
23,1,1689.727273  
23,1,2110.916667  
23,1,2644.939103  
23,1,7200.764535  
23,1,1506.557927  
23,1,1621.839744  
23,1,3070.857143  
23,1,13747.369444  
23,1,19575.607143  
23,1,1509.315789  
23,1,16426.354167  
23,1,15005.546512  
23,1,9189.777027  
23,1,1569.396875  
23,1,1581.505814  
23,1,17156.592105  
23,1,2176.298780  
23,1,9532.828804  
23,1,14124.301282  
23,1,1835.460366  
23,1,5391.900424  
23,1,4328.267857  
23,1,9392.996875  
23,1,4782.666667  
23,1,3669.494565  
23,1,1539.000000  
23,1,6104.022727  
23,1,18096.550676  
23,1,2678.907500  
23,1,14569.583333  
23,1,5303.031250  
23,1,5724.714286  
23,1,4095.125000  
23,1,1894.454545  
23,1,8025.418103  
23,1,4091.253676  
23,1,1612.901786  
23,1,2783.025641  
23,1,3075.461290  
23,1,5959.418605  
23,1,10855.145161  
23,1,1669.125000  
23,1,1540.125000  
23,1,12872.433333  
23,1,1588.031250  
23,1,4336.505814  
23,1,3518.686111  
23,1,3169.314516  
23,1,1990.900000  
23,1,8806.346154  
23,1,6686.500000  
23,1,2031.041667  
23,1,3569.176630  
23,1,3167.031250  
23,1,4647.433824  
23,1,3350.919271

23,1,13248.336111  
23,1,8407.015625  
23,1,3551.404255  
23,1,11401.256944  
23,1,3001.979730  
23,1,1747.015625  
23,1,2383.000000  
23,1,4496.620370  
23,1,7039.059211  
23,1,18969.224359  
23,1,5132.541667  
23,1,2496.930556  
23,1,2093.344595  
23,1,1850.085106  
23,1,2345.884146  
23,1,8961.408333  
23,1,1948.611702  
23,1,6553.477273  
23,1,7276.579545  
23,1,3329.280303  
23,1,3151.805851  
23,1,5989.082143  
23,1,8617.336111  
23,1,1766.008523  
23,1,6124.958333  
23,1,1538.530612  
23,1,3760.875000  
23,1,13295.545918  
23,1,2944.282738  
23,1,15174.794118  
23,1,3335.954787  
23,1,1568.782738  
23,1,4064.055147  
23,1,1605.116667  
23,1,1787.203125  
23,1,9013.553571  
23,1,3858.763514  
23,1,5118.997340  
23,1,6501.780488  
23,1,2440.955882  
23,1,2630.023256  
23,1,2419.958333  
23,1,2288.345930  
23,1,2169.508929  
23,1,5741.500000  
23,1,1959.881579  
23,1,5072.182927  
23,1,2009.075472  
23,1,4584.324324  
23,1,2714.145349  
23,1,4487.958333  
23,1,4175.500000  
23,1,18113.869565  
23,1,2882.542411  
23,1,5791.016667  
23,1,2607.872340  
23,1,19112.384615  
23,1,3857.030000  
23,1,2830.486111  
23,1,17526.756757  
23,1,4191.694444  
23,1,10424.915625  
23,1,2382.250000  
23,1,2200.856618  
23,1,1957.500000  
23,1,9286.980769

23,1,3525.322917  
23,1,10832.456250  
23,1,5062.833333  
23,1,1824.835227  
23,1,5962.968085  
23,1,5092.552632  
23,1,1642.708333  
23,1,4033.777778  
23,1,2085.875000  
23,1,2761.607500  
23,1,17116.759615  
23,1,2599.834302  
23,1,3190.240000  
23,1,17725.532609  
23,1,2415.150000  
23,1,1997.600000  
23,1,2379.680851  
23,1,1560.032609  
23,1,7992.601744  
23,1,1835.829268  
23,1,9320.677632  
23,1,2529.996951  
23,1,2210.808511  
23,1,2432.630208  
23,1,11095.412500  
23,1,1808.695122  
23,1,15850.351562  
23,1,4391.462500  
23,1,3048.600000  
23,1,6628.625000  
23,1,16833.166667  
23,1,10285.402542  
23,1,5519.766667  
23,1,2837.940104  
23,1,1550.062500  
23,1,9655.104839  
23,1,2241.187500  
23,1,9096.409091  
23,1,8934.166667  
23,1,8969.327703  
23,1,13675.684659  
23,1,4910.630208  
23,1,2615.755102  
23,1,6543.815789  
23,1,7208.207447  
23,1,1768.628571  
23,1,3953.153846  
23,1,1631.802083  
23,1,1711.865854  
23,1,3740.937500  
23,1,1723.024390  
23,1,6255.250000  
23,1,1663.815789  
23,1,11673.515957  
23,1,6343.063830  
23,1,12519.960526  
23,1,4329.502907  
23,1,5131.125000  
23,1,1858.750000  
23,1,2999.351351  
23,1,4816.726852  
23,1,1921.464286  
23,1,14961.937500  
23,1,2456.491935  
23,1,6225.156250  
23,1,9675.448718

23,1,1747.882353  
23,1,3253.906977  
23,1,2599.337838  
23,1,1534.414773  
23,1,4121.423611  
23,1,6189.909091  
23,1,1991.791667  
23,1,2515.295455  
23,1,18818.954861  
23,1,15677.632353  
23,1,3329.906250  
23,1,17143.125000  
23,1,11724.987500  
23,1,5842.647059  
23,1,5397.255319  
23,1,9637.868750  
23,1,3638.630435  
23,1,2112.260417  
23,1,2340.149390  
23,1,2724.827586  
23,1,1733.952586  
23,1,2125.428571  
23,1,14315.263514  
23,1,1849.500000  
23,1,3554.622500  
23,1,2440.464844  
23,1,3435.539474  
23,1,3937.750000  
23,1,8453.760135  
23,1,1553.131579  
23,1,3685.112500  
23,1,1552.375000  
23,1,1642.961957  
23,1,2195.793919  
23,1,6380.034091  
23,1,10979.666667  
23,1,6927.937500  
23,1,12448.744681  
23,1,3965.448529  
23,1,5741.012821  
23,1,2686.243590  
23,1,7238.333333  
23,1,1739.966667  
23,1,2014.062500  
23,1,2846.421053  
23,1,4010.886364  
23,1,1570.664062  
23,1,8320.794118  
23,1,4250.736842  
23,1,14488.729167  
23,1,7722.892857  
23,1,1939.823370  
23,1,2052.609375  
23,1,4074.943750  
23,1,1666.753125  
23,1,9920.906250  
23,1,4685.375000  
23,1,1536.714286  
23,1,11762.375000  
23,1,4476.935000  
23,1,2811.684028  
23,1,1996.242424  
23,1,2922.062500  
23,1,2711.887255  
23,1,2089.250000  
23,1,1557.684211

23,1,1986.997340  
23,1,7632.425532  
23,1,4332.426471  
23,1,10217.700000  
23,1,2909.586111  
23,1,2425.642857  
23,1,3717.923780  
23,1,10338.978448  
23,1,6115.810185  
23,1,17742.384615  
23,1,14228.429688  
23,1,6814.035714  
23,1,15460.963415  
23,1,2197.112805  
23,1,2999.213710  
23,1,1708.232143  
23,1,3406.900000  
23,1,2553.651316  
23,1,2825.103659  
23,1,5182.121795  
23,1,2909.478261  
23,1,5058.797297  
23,1,12505.271277  
23,1,10780.070312  
23,1,8895.125000  
23,1,3794.272727  
23,1,12093.333333  
23,1,5048.159091  
23,1,12739.584559  
23,1,3607.485294  
23,1,2125.218750  
23,1,2213.753378  
23,1,7401.437500  
23,1,4277.493902  
23,1,2689.538265  
23,1,3544.145161  
23,1,9472.363636  
23,1,1706.250000  
23,1,3309.189655  
23,1,14684.953125  
23,1,4378.580645  
23,1,2553.412500  
23,1,2974.082143  
23,1,1828.400000  
23,1,14138.531250  
23,1,1567.886364  
23,1,3010.600000  
23,1,10726.466216  
23,1,11533.905303  
23,1,7781.947368  
23,1,4554.500000  
23,1,7445.200000  
23,1,16024.181818  
23,1,4106.136364  
23,1,7103.483871  
23,1,16072.153846  
23,1,12088.419872  
23,1,10406.341837  
23,1,2591.812500  
23,1,2347.238889  
23,1,5072.800000  
23,1,2559.320513  
23,1,4865.523256  
23,1,5075.812500  
23,1,3099.293269  
23,1,2496.650568

23,1,2566.965517  
23,1,3654.265625  
23,1,19517.585227  
23,1,9831.416667  
23,1,12700.095238  
23,1,5246.892857  
23,1,2641.329167  
23,1,10341.641892  
23,1,3357.625000  
23,1,2996.167553  
23,1,8076.340278  
23,1,2312.774390  
23,1,14713.566406  
23,1,2771.852564  
23,1,2479.571429  
23,1,3703.573864  
23,1,5216.032258  
23,1,12003.092742  
23,1,1925.193548  
23,1,1775.990854  
23,1,8379.905405  
23,1,2317.141667  
23,1,1907.459559  
23,1,2091.395349  
23,1,1710.739796  
23,1,4589.909091  
23,1,11999.839286  
23,1,2640.687500  
23,1,18452.648649  
23,1,4427.018519  
23,1,3143.218750  
23,1,2091.638514  
23,1,6951.823529  
23,1,12722.912791  
23,1,1746.487805  
23,1,14598.830882  
23,1,5379.609694  
23,1,1914.128049  
23,1,1685.144737  
23,1,3396.012821  
23,1,4190.029412  
23,1,2948.121622  
23,1,4121.963235  
23,1,11281.884146  
23,1,1650.584375  
23,1,1902.597826  
23,1,13261.943182  
23,1,2184.985577  
23,1,2018.069444  
23,1,3338.772727  
23,1,10231.782895  
23,1,1584.500000  
23,1,17941.279605  
23,1,10757.910156  
23,1,2095.960227  
23,1,8516.304878  
23,1,1916.230769  
23,1,3280.088235  
23,1,7004.780488  
23,1,3956.996324  
23,1,2286.045455  
23,1,12938.844444  
23,1,2451.192308  
23,1,2892.659091  
23,1,4198.113095  
23,1,1889.993902

23,1,2622.554688  
23,1,5864.818750  
23,1,2341.522727  
23,1,7085.512500  
23,1,9839.343750  
23,1,1792.891447  
23,1,4769.416667  
23,1,2908.113636  
23,1,1516.760000  
23,1,4132.446429  
23,1,4255.136719  
23,1,2728.538462  
23,1,3205.648438  
23,1,5806.166667  
23,1,11620.556818  
23,1,2931.650000  
23,1,11668.992188  
23,1,1511.975610  
23,1,2711.941860  
23,1,3126.695312  
23,1,6748.294118  
23,1,1693.000000  
23,1,11738.051724  
23,1,1516.600000  
23,1,1851.764706  
23,1,4735.692308  
23,1,3707.179487  
23,1,5377.916667  
23,1,5606.942857  
23,1,2957.151515  
23,1,4801.316667  
23,1,1892.786585  
23,1,17208.960000  
23,1,1815.814189  
23,1,2761.654762  
23,1,8320.625000  
23,1,1853.666667  
23,1,11855.371429  
23,1,12647.916667  
23,1,12175.232143  
23,1,1657.750000  
23,1,15346.237179  
23,1,2080.423077  
23,1,2956.922794  
23,1,4364.081897  
23,1,19889.823529  
23,1,2268.845238  
23,1,12391.229730  
23,1,1676.205357  
23,1,1516.410156  
23,1,1538.860795  
23,1,2040.647059  
23,1,3456.620690  
23,1,11003.152174  
23,1,5104.190789  
23,1,4421.615385  
23,1,3199.114583  
23,1,3529.500000  
23,1,10527.256098  
23,1,5502.482143  
23,1,2440.650000  
23,1,4677.006098  
23,1,11712.738372  
23,1,1562.125000  
23,1,5439.985795  
23,1,1779.463415

23,1,3652.191176  
23,1,2566.284483  
23,1,14206.105769  
23,1,18427.909574  
23,1,3147.857143  
23,1,2497.763514  
23,1,4795.218750  
23,1,4541.818182  
23,1,15262.285156  
23,1,7747.588235  
23,1,16105.022727  
23,1,7930.093750  
23,1,16251.089674  
23,1,2562.500000  
23,1,3764.048913  
23,1,2157.187500  
23,1,11959.452703  
23,1,2799.700000  
23,1,2161.678571  
23,1,1767.168919  
23,1,5613.738636  
23,1,2173.421053  
23,1,3601.267442  
23,1,4890.153846  
23,1,3007.115385  
23,1,6472.071429  
23,1,10334.118902  
23,1,14706.865385  
23,1,3379.455882  
23,1,4441.333333  
23,1,2209.532051  
23,1,4212.371951  
23,1,2713.232143  
23,1,3504.035156  
23,1,3401.363971  
23,1,2189.767857  
23,1,7701.012195  
23,1,2011.375000  
23,1,9396.105769  
23,1,5010.846875  
23,1,2039.429688  
23,1,1821.532500  
23,1,3209.489286  
23,1,4566.414634  
23,1,5600.400000  
23,1,4115.666667  
23,1,10846.238095  
23,1,8268.205882  
23,1,4355.319444  
23,1,1949.229167  
23,1,1874.862069  
23,1,4312.419643  
23,1,9337.154605  
23,1,2311.458333  
23,1,2499.695652  
23,1,3264.935897  
23,1,3537.379808  
23,1,2831.337500  
23,1,6626.307692  
23,1,11450.911111  
23,1,4537.069853  
23,1,3505.816176  
23,1,2016.334677  
23,1,1914.890625  
23,1,5537.782609  
23,1,3722.675595

23,1,3578.306250  
23,1,4141.483696  
23,1,2014.871094  
23,1,3774.835227  
23,1,6468.100694  
23,1,4315.534884  
23,1,4466.829861  
23,1,4545.833333  
23,1,1880.128049  
23,1,1635.516447  
23,1,8832.837209  
23,1,3362.281250  
23,1,4363.045455  
23,1,12469.634375  
23,1,11517.517045  
23,1,1585.333333  
23,1,12807.094512  
23,1,5316.395833  
23,1,7508.340909  
23,1,5351.281250  
23,1,1974.785714  
23,1,6241.209677  
23,1,3283.872340  
23,1,1965.735714  
23,1,1821.608108  
23,1,2482.900735  
23,1,4767.000000  
23,1,5379.753289  
23,1,2944.500000  
23,1,3056.694853  
23,1,1826.255319  
23,1,2221.065476  
23,1,2731.750000  
23,1,7263.357143  
23,1,5259.290323  
23,1,2473.847826  
23,1,4491.576613  
23,1,17990.028571  
23,1,2964.653846  
23,1,4592.923611  
23,1,1973.279412  
23,1,2804.475000  
23,1,10382.365385  
23,1,2444.255556  
23,1,3889.553125  
23,1,9334.984375  
23,1,18404.952381  
23,1,13296.421053  
23,1,6358.297619  
23,1,3329.425676  
23,1,2098.650641  
23,1,2295.854839  
23,1,4311.121622  
23,1,2209.236842  
23,1,15361.417614  
23,1,11112.455882  
23,1,4741.713542  
23,1,14261.225000  
23,1,11842.044444  
23,1,2120.898438  
23,1,2467.783537  
23,1,1972.150000  
23,1,3212.256944  
23,1,2268.690476  
23,1,2819.314655  
23,1,2239.389205

23,1,9250.416667  
23,1,2374.096939  
23,1,10658.528571  
23,1,3534.467857  
23,1,9287.006250  
23,1,10986.058824  
23,1,11942.818182  
23,1,2397.710526  
23,1,2081.125000  
23,1,10463.025641  
23,1,2942.840909  
23,1,3543.775641  
23,1,1512.910714  
23,1,8346.697674  
23,1,16846.058824  
23,1,1783.687500  
23,1,1792.708333  
23,1,2855.033333  
23,1,2328.073529  
23,1,15720.375000  
23,1,2272.175676  
23,1,3733.000000  
23,1,15840.250000  
23,1,1617.319853  
23,1,1615.823529  
23,1,9238.648649  
23,1,5744.084239  
23,1,6508.743590  
23,1,12102.476974  
23,1,2011.525000  
23,1,2727.418103  
23,1,3228.019231  
23,1,6896.122093  
23,1,1884.307692  
23,1,1522.296429  
23,1,2088.910714  
23,1,2413.551282  
23,1,5367.598837  
23,1,3872.445312  
23,1,11451.883333  
23,1,3330.482143  
23,1,2087.488889  
23,1,3032.402344  
23,1,2614.144231  
23,1,11982.875000  
23,1,6923.445652  
23,1,1665.540323  
23,1,2087.250000  
23,1,8748.165698  
23,1,2193.701220  
23,1,1644.423077  
23,1,2946.577381  
23,1,3745.494048  
23,1,4848.000000  
23,1,3180.365854  
23,1,12795.883929  
23,1,3999.578125  
23,1,2463.854167  
23,1,8977.625000  
23,1,1674.833333  
23,1,3185.400000  
23,1,14945.082143  
23,1,1892.994565  
23,1,9971.639344  
23,1,1734.200000  
23,1,1904.946429

23,1,16062.711864  
23,1,1557.113636  
23,1,4357.198171  
23,1,7394.833333  
23,1,7271.116279  
23,1,1862.375000  
23,1,3945.529070  
23,1,1821.285714  
23,1,3184.527273  
23,1,5166.287736  
23,1,1627.888889  
23,1,15587.589286  
23,1,5893.717391  
23,1,2853.569444  
23,1,6174.656250  
23,1,7401.239583  
23,1,15956.269737  
23,1,1522.875000  
23,1,2447.833333  
23,1,1995.238636  
23,1,3543.008065  
23,1,2831.729651  
23,1,2744.614362  
23,1,1629.375000  
23,1,5502.171875  
23,1,3342.680921  
23,1,10785.607143  
23,1,1974.500000  
23,1,3075.503731  
23,1,1781.000000  
23,1,3355.333333  
23,1,3430.338235  
23,1,2365.026596  
23,1,2217.296512  
23,1,8450.486486  
23,1,2416.230978  
23,1,9155.294118  
23,1,1953.867925  
23,1,1745.460526  
23,1,2484.180000  
23,1,4849.325581  
23,1,3914.459459  
23,1,5969.520833  
23,1,8159.806452  
23,1,7600.800000  
23,1,1618.000000  
23,1,3526.457547  
23,1,2270.270270  
23,1,5591.961111  
23,1,2351.150000  
23,1,2557.477273  
23,1,1840.535714  
23,1,6950.273026  
23,1,1743.402439  
23,1,5330.243902  
23,1,15158.500000  
23,1,2088.768182  
23,1,6436.025641  
23,1,1994.666667  
23,1,11109.515957  
23,1,2519.947674  
23,1,1754.051471  
23,1,1969.568182  
23,1,18900.455729  
23,1,5430.894737  
23,1,15184.419643

23,1,7674.160000  
23,1,6409.171875  
23,1,6363.413043  
23,1,3760.312500  
23,1,2007.039062  
23,1,4396.014286  
23,1,1911.910714  
23,1,12886.093750  
23,1,5450.544643  
23,1,2384.640000  
23,1,6954.666667  
23,1,2495.972222  
23,1,5285.136792  
23,1,4298.276163  
23,1,3595.216667  
23,1,7522.203125  
23,1,1603.534091  
23,1,14622.510417  
23,1,2317.657895  
23,1,3783.102273  
23,1,4348.815972  
23,1,3410.500000  
23,1,3099.944149  
23,1,2714.701923  
23,1,6864.055804  
23,1,6853.461538  
23,1,13196.019531  
23,1,4827.146635  
23,1,1638.841463  
23,1,5111.096591  
23,1,19447.510638  
23,1,12624.142442  
23,1,4635.453125  
23,1,1816.369565  
23,1,1582.534722  
23,1,3579.358491  
23,1,3246.173077  
23,1,6992.125000  
23,1,9735.882812  
23,1,6016.057692  
23,1,12120.835227  
23,1,8784.214674  
23,1,1794.604651  
23,1,2214.668478  
23,1,4797.958333  
23,1,1624.187500  
23,1,2180.462500  
23,1,2829.755102  
23,1,2165.100806  
23,1,1780.802083  
23,1,4068.520833  
23,1,12601.625000  
23,1,17179.403846  
23,1,9109.048913  
23,1,2498.916667  
23,1,5561.691406  
23,1,3721.840909  
23,1,4573.607143  
23,1,19963.723837  
23,1,3407.468750  
23,1,4645.336538  
23,1,2138.238372  
23,1,1707.000000  
23,1,6169.695652  
23,1,9530.600000  
23,1,2199.534091

23,1,10575.468085  
23,1,1628.125000  
23,1,3814.224537  
23,1,2426.350000  
23,1,1696.294118  
23,1,1719.133929  
23,1,18418.625000  
23,1,2465.700000  
23,1,10485.842105  
23,1,9123.152439  
23,1,6601.250000  
23,1,17427.509434  
23,1,1572.628049  
23,1,3529.645161  
23,1,1765.125000  
23,1,11663.041667  
23,1,16452.950000  
23,1,5255.951389  
23,1,1789.450658  
23,1,1769.503289  
23,1,6723.256579  
23,1,1941.923077  
23,1,1803.334239  
23,1,1713.468750  
23,1,5026.936170  
23,1,4562.537234  
23,1,3287.125000  
23,1,11899.156250  
23,1,10560.425000  
23,1,5119.557692  
23,1,13974.678241  
23,1,1946.902439  
23,1,17517.899457  
23,1,2253.454545  
23,1,7574.209302  
23,1,3372.516667  
23,1,2412.027273  
23,1,9414.862500  
23,1,3939.385000  
23,1,8271.589623  
23,1,2962.492188  
23,1,4968.043750  
23,1,5688.973558  
23,1,1523.523936  
23,1,5337.347222  
23,1,15813.842857  
23,1,2895.992347  
23,1,3395.521739  
23,1,2302.351351  
23,1,3383.835526  
23,1,3469.409091  
23,1,1986.845930  
23,1,5734.835106  
23,1,7082.137931  
23,1,4601.210526  
23,1,3103.236842  
23,1,2915.000000  
23,1,3062.750000  
23,1,15146.020833  
23,1,2728.083333  
23,1,2387.657738  
23,1,10594.358974  
23,1,10484.432927  
23,1,3032.363636  
23,1,1568.547872  
23,1,2395.183673

23,1,3897.559375  
23,1,18804.253906  
23,1,13954.707447  
23,1,1595.187500  
23,1,1520.246324  
23,1,2900.600000  
23,1,16165.381250  
23,1,11179.187500  
23,1,3599.763514  
23,1,15721.072368  
23,1,13626.148649  
23,1,3109.098958  
23,1,12547.750000  
23,1,3447.161932  
23,1,3873.375000  
23,1,2663.146875  
23,1,13253.500000  
23,1,2281.087500  
23,1,4419.054688  
23,1,2639.125000  
23,1,1885.333333  
23,1,2756.682927  
23,1,2868.218182  
23,1,2952.862069  
23,1,8527.243750  
23,1,1537.785714  
23,1,14725.905172  
23,1,8067.890625  
23,1,4536.790441  
23,1,2087.675000  
23,1,2531.340625  
23,1,2250.395833  
23,1,14622.691860  
23,1,8754.781250  
23,1,1691.384615  
23,1,2715.220000  
23,1,17029.035714  
23,1,7659.500000  
23,1,11203.517045  
23,1,5866.420732  
23,1,6598.357143  
23,1,1991.500000  
23,1,1929.480769  
23,1,4945.710714  
23,1,5363.875000  
23,1,3275.072115  
23,1,1702.103659  
23,1,3259.371429  
23,1,6467.102941  
23,1,10808.387500  
23,1,5221.500000  
23,1,5696.403846  
23,1,10777.889706  
23,1,4316.823171  
23,1,1575.500000  
23,1,5889.556818  
23,1,2164.632353  
23,1,5477.766129  
23,1,5867.757576  
23,1,2333.168750  
23,1,8473.250000  
23,1,2307.273438  
23,1,4237.589286  
23,1,2432.402778  
23,1,10621.448718  
23,1,1878.162500

23,1,4579.618750  
23,1,3194.000000  
23,1,2279.433594  
23,1,2747.510870  
23,1,1707.074468  
23,1,4125.562500  
23,1,7215.589286  
23,1,9211.723684  
23,1,3093.178030  
23,1,2036.433824  
23,1,4708.017857  
23,1,2295.207143  
23,1,2118.215909  
23,1,3172.804054  
23,1,6573.901316  
23,1,1558.250000  
23,1,5831.635870  
23,1,15394.971154  
23,1,16155.634868  
23,1,5292.637500  
23,1,19667.341912  
23,1,2874.413793  
23,1,10974.939024  
23,1,3351.058594  
23,1,4741.687500  
23,1,4123.292683  
23,1,1677.095109  
23,1,6389.250000  
23,1,2053.125000  
23,1,6776.396947  
23,1,8368.304688  
23,1,2827.537879  
23,1,6188.544118  
23,1,2299.250000  
23,1,5016.257143  
23,1,3864.717105  
23,1,3324.718750  
23,1,4601.650000  
23,1,8361.209677  
23,1,13552.513587  
23,1,7603.931250  
23,1,3546.413690  
23,1,1717.875000  
23,1,2834.000000  
23,1,1556.125000  
23,1,2053.926829  
23,1,10096.939516  
23,1,7069.515625  
23,1,8467.192308  
23,1,3463.982143  
23,1,6340.361111  
23,1,10427.666667  
23,1,2825.631579  
23,1,5530.847561  
23,1,13597.322917  
23,1,1910.718750  
23,1,2203.416667  
23,1,15455.657895  
23,1,2576.666667  
23,1,8373.462500  
23,1,12721.790816  
23,1,2947.753472  
23,1,2249.981618  
23,1,14718.468085  
23,1,2320.772436  
23,1,3229.755952

23,1,1907.838415  
23,1,15871.323171  
23,1,3812.352273  
23,1,5656.621622  
23,1,15841.830882  
23,1,2471.750000  
23,1,6326.531250  
23,1,4507.852941  
23,1,4197.385135  
23,1,1938.197115  
23,1,12371.906250  
23,1,3033.000000  
23,1,8382.198171  
23,1,2930.384615  
23,1,2325.178571  
23,1,9211.551136  
23,1,5809.368056  
23,1,11429.081250  
23,1,2319.857143  
23,1,2322.357143  
23,1,17132.136364  
23,1,12124.809211  
23,1,15484.633333  
23,1,1754.344512  
23,1,5201.009259  
23,1,9753.000000  
23,1,5271.835366  
23,1,16175.362500  
23,1,14691.798077  
23,1,15338.973404  
23,1,12394.681818  
23,1,7128.535000  
23,1,3502.277778  
23,1,3029.101852  
23,1,2166.556818  
23,1,10950.705357  
23,1,3059.067857  
23,1,2471.088235  
23,1,1789.854167  
23,1,7001.000000  
23,1,4118.642857  
23,1,5670.198864  
23,1,9898.970588  
23,1,13681.711111  
23,1,3837.946875  
23,1,1536.744792  
23,1,1546.384615  
23,1,6541.705000  
23,1,3680.533333  
23,1,16641.607143  
23,1,3265.968750  
23,1,6395.461538  
23,1,1982.964286  
23,1,6266.916667  
23,1,7010.714286  
23,1,3018.948718  
23,1,2310.647059  
23,1,1584.386905  
23,1,2326.845588  
23,1,14018.832317  
23,1,2682.835714  
23,1,12549.898256  
23,1,2646.451220  
23,1,2310.970588  
23,1,1848.949219  
23,1,2202.115854

23,1,19648.708333  
23,1,3327.525000  
23,1,1682.644231  
23,1,5586.291667  
23,1,2891.974265  
23,1,3335.055147  
23,1,4597.000000  
23,1,3537.037500  
23,1,2516.000000  
23,1,9425.332317  
23,1,1531.904412  
23,1,1570.062500  
23,1,10656.625000  
23,1,1968.125000  
23,1,3142.838710  
23,1,7766.647059  
23,1,13788.903226  
23,1,8137.208333  
23,1,1676.185811  
23,1,3047.959559  
23,1,11587.973684  
23,1,1939.500000  
23,1,12255.463415  
23,1,3592.545455  
23,1,1826.833333  
23,1,8956.036184  
23,1,13530.812500  
23,1,13441.812500  
23,1,2627.320122  
23,1,5472.432692  
23,1,13859.817073  
23,1,1611.930000  
23,1,5323.381098  
23,1,1596.446429  
23,1,2634.500000  
23,1,3293.833333  
23,1,1653.351190  
23,1,3411.833333  
23,1,2075.243902  
23,1,2879.625000  
23,1,1906.297619  
23,1,7891.375000  
23,1,8250.902439  
23,1,10659.878205  
23,1,3388.073171  
23,1,6491.838235  
23,1,3022.911765  
23,1,3494.692308  
23,1,1930.673077  
23,1,7712.770408  
23,1,4026.290441  
23,1,11766.080357  
23,1,3017.059524  
23,1,11013.303125  
23,1,4890.880208  
23,1,4684.363636  
23,1,6801.847561  
23,1,1861.843750  
23,1,7830.897436  
23,1,1558.940476  
23,1,18880.440789  
23,1,2391.750000  
23,1,4485.690625  
23,1,2793.625000  
23,1,1500.720930  
23,1,1929.576923

23,1,2127.779412  
23,1,2119.926471  
23,1,5416.062500  
23,1,2903.341837  
23,1,4008.324219  
23,1,3213.775568  
23,1,1610.192308  
23,1,4843.578125  
23,1,13311.861111  
23,1,1934.563830  
23,1,2284.204545  
23,1,7210.276596  
23,1,3323.455556  
23,1,4798.727941  
23,1,13749.202381  
23,1,7939.472656  
23,1,13496.057432  
23,1,14515.625000  
23,1,1593.085784  
23,1,2902.640625  
23,1,1870.912791  
23,1,5394.761719  
23,1,7013.840000  
23,1,2291.923077  
23,1,14462.243902  
23,1,16536.857143  
23,1,1593.853261  
23,1,1534.971429  
23,1,19148.628472  
23,1,17979.250000  
23,1,4090.211538  
23,1,2634.271341  
23,1,7399.540541  
23,1,2227.119681  
23,1,7662.661765  
23,1,7945.554054  
23,1,5383.735294  
23,1,4409.529255  
23,1,2738.011574  
23,1,3937.663462  
23,1,2946.683824  
23,1,10875.500000  
23,1,8912.041667  
23,1,2721.218750  
23,1,7171.829545  
23,1,2330.143293  
23,1,1703.609375  
23,1,6159.180000  
23,1,13348.288265  
23,1,16966.535714  
23,1,3063.605263  
23,1,7438.106618  
23,1,2208.529412  
23,1,1783.536765  
23,1,1502.367424  
23,1,6629.017857  
23,1,3094.200000  
23,1,8748.814394  
23,1,6180.781250  
23,1,2984.808824  
23,1,1595.759868  
23,1,14855.481132  
23,1,4204.500000  
23,1,1510.355556  
23,1,2864.842105  
23,1,2769.352564

23,1,1560.761905  
23,1,7517.093137  
23,1,14732.767442  
23,1,2351.146739  
23,1,3882.079082  
23,1,4607.625000  
23,1,2160.410714  
23,1,2118.286458  
23,1,19664.535714  
23,1,4720.241667  
23,1,2038.125000  
23,1,8052.989130  
23,1,1797.695652  
23,1,3311.777778  
23,1,2237.476562  
23,1,4161.947368  
23,1,3220.599265  
23,1,3822.669118  
23,1,3316.244444  
23,1,3407.891447  
23,1,16561.970238  
23,1,1651.692073  
23,1,2376.336735  
23,1,7950.135135  
23,1,3165.260135  
23,1,2739.913194  
24,2,1775.150641  
24,2,2672.102273  
24,2,1759.055147  
24,2,2555.019231  
24,2,2028.439024  
24,2,5127.383333  
24,2,1875.067935  
24,2,1949.684783  
24,2,1571.670213  
24,2,4980.785714  
24,2,2015.911290  
24,2,1651.509375  
24,2,2559.365132  
24,2,1679.971774  
24,2,2506.058511  
24,2,1524.446809  
24,2,2007.675000  
24,2,2319.245283  
24,2,2646.941176  
24,2,2069.195755  
24,2,2572.842742  
24,2,1852.400000  
24,2,7359.578125  
24,2,1934.825000  
24,2,2453.577778  
24,2,1856.875000  
24,2,3376.709091  
24,2,2287.875000  
24,2,2758.551471  
24,2,1572.800000  
24,2,1642.730556  
24,2,8364.363636  
24,2,2084.702381  
24,2,1558.125000  
24,2,2131.852273  
24,2,2078.150000  
24,2,2478.807500  
24,2,3757.297297  
24,2,2277.446809  
24,2,2777.571429

24,2,2158.329268  
24,2,1730.136364  
24,2,2462.325000  
24,2,9271.033654  
24,2,2034.340426  
24,2,2828.195313  
24,2,1587.523256  
24,2,2386.922619  
24,2,2587.960000  
24,2,1750.592593  
24,2,1600.031818  
24,2,3431.846154  
24,2,2759.783333  
24,2,1544.710526  
24,2,4178.921569  
24,2,2015.491848  
24,2,1643.957447  
24,2,1853.957237  
24,2,1537.055556  
24,2,1958.978723  
24,2,1523.769231  
24,2,1716.085000  
24,2,2493.384615  
24,2,9573.642857  
24,2,1737.521739  
24,2,3180.712963  
24,2,2632.451923  
24,2,2159.020270  
24,2,1554.758929  
24,2,2424.111111  
24,2,4659.032407  
24,2,1724.536585  
24,2,3092.747093  
24,2,1861.814024  
24,2,1610.447500  
24,2,1589.500000  
24,2,2122.411765  
24,2,3437.322500  
24,2,3972.276316  
24,2,10127.687500  
24,2,3763.955357  
24,2,1837.953125  
24,2,2287.940000  
24,2,4217.000000  
24,2,1499.391026  
24,2,1572.965000  
24,2,1885.302083  
24,2,1599.511628  
24,2,2763.505102  
24,2,2005.470395  
24,2,1966.252841  
24,2,2196.278689  
24,2,5080.270349  
24,2,7721.454082  
24,2,3174.305233  
24,2,2520.076220  
24,2,2111.202586  
24,2,4033.720588  
24,2,2391.000000  
24,2,1675.688953  
24,2,1513.148649  
24,2,5099.941406  
24,2,1566.444915  
24,2,1657.430000  
24,2,2044.633929  
24,2,2927.945652

24,2,1571.988889  
24,2,1631.277174  
24,2,3673.900000  
24,2,1698.560000  
24,2,1901.260870  
24,2,1724.692308  
24,2,1834.263393  
24,2,1870.576923  
24,2,2092.535156  
24,2,2188.244681  
24,2,1543.725490  
24,2,5712.975000  
24,2,1983.909091  
24,2,2168.638298  
24,2,2334.181818  
24,2,2782.722222  
24,2,1706.680556  
24,2,2139.690104  
24,2,1971.285256  
24,2,11188.801887  
24,2,2630.394737  
24,2,2759.366379  
24,2,1887.660714  
24,2,2145.645000  
24,2,2006.800000  
24,2,1592.239130  
24,2,2010.788265  
24,2,1691.584677  
24,2,1517.221154  
24,2,2363.069767  
24,2,2085.140000  
24,2,4038.952381  
24,2,1752.651316  
24,2,1519.308333  
24,2,2062.285714  
24,2,2311.757653  
24,2,1936.896739  
24,2,1630.750000  
24,2,2003.892045  
24,2,2097.220588  
24,2,1502.864865  
24,2,1824.646341  
24,2,1853.941860  
24,2,2239.852564  
24,2,1526.324468  
24,2,2209.634434  
24,2,1986.113636  
24,2,1706.042614  
24,2,2295.207317  
24,2,3580.527778  
24,2,1602.480000  
24,2,2694.115000  
24,2,1576.664062  
24,2,5992.264706  
24,2,1689.932692  
24,2,1526.977778  
24,2,1995.050000  
24,2,1969.880435  
24,2,1809.275000  
24,2,1538.761029  
24,2,3910.308824  
24,2,1569.675676  
24,2,1617.705882  
24,2,1533.600000  
24,2,6163.027174  
24,2,1692.875000

24,2,3035.341837  
24,2,1589.528571  
24,2,3015.236842  
24,2,1758.750000  
24,2,2775.017857  
24,2,1888.113636  
24,2,2023.333333  
24,2,1522.860465  
24,2,1999.021739  
24,2,2316.631579  
24,2,2011.377358  
24,2,1525.754310  
24,2,1862.798780  
24,2,1960.729730  
24,2,2304.041667  
24,2,2227.901961  
24,2,1791.846429  
24,2,2102.836957  
24,2,3609.323864  
24,2,1698.855769  
24,2,2075.323529  
24,2,2420.093750  
24,2,2491.520000  
24,2,2308.892045  
24,2,2628.297872  
24,2,1588.149390  
24,2,2691.275000  
24,2,1749.096154  
24,2,2786.904762  
24,2,1757.181818  
24,2,4695.937500  
24,2,1524.490196  
24,2,1825.000000  
24,2,1755.039773  
24,2,8885.896341  
24,2,2031.819767  
24,2,3993.235294  
24,2,4070.031250  
24,2,1607.520408  
24,2,1591.517857  
24,2,1623.041667  
24,2,4012.062500  
24,2,1599.000000  
24,2,1813.144444  
24,2,1932.020270  
24,2,4609.275000  
24,2,3824.454545  
24,2,1660.922619  
24,2,2461.243304  
24,2,1826.000000  
24,2,1587.757500  
24,2,1615.704545  
24,2,3305.653846  
24,2,1899.425595  
24,2,1541.717500  
24,2,2303.950000  
24,2,2515.200000  
24,2,2078.976190  
24,2,1499.944444  
24,2,1736.988095  
24,2,3471.076531  
24,2,4372.054348  
24,2,1720.006098  
24,2,3228.710938  
24,2,1536.750000  
24,2,1868.607143

24,2,2053.010000  
24,2,2339.680851  
24,2,2915.779412  
24,2,1532.664516  
24,2,3389.866477  
24,2,1644.723404  
24,2,1975.109756  
24,2,2475.056250  
24,2,2914.682065  
24,2,2673.234375  
24,2,1796.393617  
24,2,1563.118421  
24,2,3313.683036  
24,2,2212.875000  
24,2,1822.585366  
24,2,2885.855978  
24,2,2616.200000  
24,2,1520.500000  
24,2,5719.709302  
24,2,2362.326087  
24,2,2234.714286  
24,2,1612.608108  
24,2,1652.616279  
24,2,1623.872340  
24,2,3497.915441  
24,2,1568.951220  
24,2,1657.113095  
24,2,1650.731250  
24,2,1788.157609  
24,2,2623.413265  
24,2,1985.640244  
24,2,1758.616848  
24,2,2235.618750  
24,2,1609.173913  
24,2,1655.083333  
24,2,2275.588235  
24,2,1804.987981  
24,2,3052.098684  
24,2,2800.382979  
24,2,1823.375000  
24,2,1738.051282  
24,2,3843.750000  
24,2,2890.572500  
24,2,1577.750000  
24,2,7459.297872  
24,2,2036.365000  
24,2,1900.896226  
24,2,2858.884615  
24,2,2778.854167  
24,2,1499.400000  
24,2,2125.882353  
24,2,1638.244048  
24,2,2093.429245  
24,2,2069.851562  
24,2,4539.567568  
24,2,1599.372093  
24,2,4405.773585  
24,2,2111.247024  
24,2,2449.530405  
24,2,1604.081250  
24,2,1562.393382  
24,2,5085.010204  
24,2,2317.441860  
24,2,1901.743243  
24,2,1630.357143  
24,2,2284.462500

24,2,12515.375000  
24,2,1521.111111  
24,2,1975.386364  
24,2,1796.619792  
24,2,3681.738208  
24,2,1742.529762  
24,2,2166.926136  
24,2,1979.354167  
24,2,2444.725000  
24,2,2426.620536  
24,2,1706.603175  
24,2,2114.722222  
24,2,1834.665909  
24,2,1886.806452  
24,2,1683.687500  
24,2,2590.531250  
24,2,1740.080357  
24,2,2281.409091  
24,2,1812.843750  
24,2,1577.672297  
24,2,2232.637500  
24,2,2109.986111  
24,2,2140.744681  
24,2,1663.750000  
24,2,2144.980392  
24,2,1621.301136  
24,2,2419.813953  
24,2,1708.000000  
24,2,5170.750000  
24,2,3318.985849  
24,2,1811.476351  
24,2,2646.526042  
24,2,2567.239796  
24,2,1676.735294  
24,2,1725.656250  
24,2,1943.664634  
24,2,3309.709677  
24,2,1991.875000  
24,2,3505.721154  
24,2,1946.083333  
24,2,2057.480392  
24,2,2882.291667  
24,2,1825.651786  
24,2,1827.333333  
24,2,1855.888889  
24,2,6333.076923  
24,2,1858.888889  
24,2,2245.297872  
24,2,3094.000000  
24,2,2466.233108  
24,2,1758.533333  
24,2,2806.700000  
24,2,2306.087500  
24,2,2627.073864  
24,2,4462.409574  
24,2,2401.796875  
24,2,1682.329545  
24,2,1500.432927  
24,2,3344.813636  
24,2,8653.210227  
24,2,1836.575000  
24,2,1777.803571  
24,2,18039.741935  
24,2,1564.969828  
24,2,3318.100000  
24,2,1730.255814

24,2,2478.469388  
24,2,1767.500000  
24,2,5532.855263  
24,2,2904.187500  
24,2,2315.250000  
24,2,2289.400000  
24,2,1852.526316  
24,2,1793.574074  
24,2,1545.343750  
24,2,1507.682692  
24,2,2163.828125  
24,2,2235.797872  
24,2,2443.575000  
24,2,2836.833333  
24,2,1769.208333  
24,2,1524.997340  
24,2,2095.957547  
24,2,2420.491071  
24,2,2157.607143  
24,2,3311.348214  
24,2,2946.104592  
24,2,1614.544643  
24,2,2296.528125  
24,2,2417.644231  
24,2,1832.568182  
24,2,1566.937500  
24,2,4738.308140  
24,2,1782.859756  
24,2,1551.410714  
24,2,3232.265625  
24,2,2409.442308  
24,2,7644.404412  
24,2,1570.419492  
24,2,2831.540000  
24,2,2530.071942  
24,2,2804.450000  
24,2,2475.104592  
24,2,1880.986111  
24,2,2857.414634  
24,2,1566.746711  
24,2,1888.363095  
24,2,2798.432432  
24,2,1590.613636  
24,2,1604.294118  
24,2,2219.000000  
24,2,1656.295732  
24,2,1546.658537  
24,2,1850.017857  
24,2,2894.696429  
24,2,2678.582237  
24,2,1792.500000  
24,2,3721.063679  
24,2,2095.003378  
24,2,2892.919118  
24,2,2282.450000  
24,2,2088.201220  
24,2,11012.192308  
24,2,2474.679775  
24,2,1910.085938  
24,2,2485.576531  
24,2,2115.559783  
24,2,1874.065217  
24,2,3199.958333  
24,2,2281.384615  
24,2,1659.255319  
24,2,2344.776316

24,2,2124.951220  
24,2,1885.864865  
24,2,1561.678571  
24,2,2371.375000  
24,2,3054.833333  
24,2,2441.655612  
24,2,3263.702381  
24,2,2255.896739  
24,2,12208.000000  
24,2,1718.954861  
24,2,1765.497449  
24,2,1515.723837  
24,2,2564.871951  
24,2,1729.117647  
24,2,2335.036765  
24,2,2320.766667  
24,2,1529.828125  
24,2,3451.073864  
24,2,1994.010753  
24,2,1527.020408  
24,2,2052.255435  
24,2,1953.613095  
24,2,1757.800000  
24,2,1634.397059  
24,2,2497.653061  
24,2,2659.297794  
24,2,1959.752551  
24,2,2056.011628  
24,2,2564.265625  
24,2,1753.842857  
24,2,1655.081081  
24,2,2253.886503  
24,2,4255.007075  
24,2,2018.940000  
24,2,1846.942308  
24,2,1708.619048  
24,2,4809.681818  
24,2,4340.750000  
24,2,2168.602941  
24,2,1754.846939  
24,2,1776.360294  
24,2,1542.700000  
24,2,3240.688830  
24,2,2374.444444  
24,2,2031.777778  
24,2,1807.526316  
24,2,2143.975610  
24,2,1576.145833  
24,2,6478.544910  
24,2,1519.714623  
24,2,1977.279070  
24,2,1524.023936  
24,2,2493.507212  
24,2,2022.336957  
24,2,5071.953704  
24,2,1742.047170  
24,2,1756.764423  
24,2,2129.750000  
24,2,2485.855263  
24,2,1789.884868  
24,2,1648.702703  
24,2,2195.000000  
24,2,2271.460000  
24,2,1613.537234  
24,2,1662.114362  
24,2,3203.580357

24,2,2594.494792  
24,2,4247.957143  
24,2,14885.821429  
24,2,1674.018939  
24,2,1608.967742  
24,2,3548.932927  
24,2,2515.701389  
24,2,1811.222561  
24,2,1742.245000  
24,2,1663.705882  
24,2,1959.896739  
24,2,2040.878049  
24,2,1621.222973  
24,2,2018.478365  
24,2,1528.583333  
24,2,2012.000000  
24,2,1938.489796  
24,2,2333.591912  
24,2,3494.794118  
24,2,2425.377907  
24,2,1795.922222  
24,2,1563.909574  
24,2,1903.142857  
24,2,1837.829268  
24,2,2377.602273  
24,2,1909.956395  
24,2,1700.228571  
24,2,3631.415888  
24,2,1556.398649  
24,2,1678.635870  
24,2,2652.941860  
24,2,1805.720000  
24,2,2748.321875  
24,2,4304.625000  
24,2,1572.784091  
24,2,1510.605000  
24,2,3975.666667  
24,2,2026.390244  
24,2,2732.797872  
24,2,2859.475000  
24,2,1655.236842  
24,2,1629.290698  
24,2,6209.225000  
24,2,2074.772727  
24,2,4337.252232  
24,2,1716.854167  
24,2,1689.197368  
24,2,2144.256098  
24,2,1579.616667  
24,2,2136.666667  
24,2,3229.420918  
24,2,2131.966981  
24,2,2026.774390  
24,2,1597.166667  
24,2,1509.448980  
24,2,3204.007042  
24,2,2002.200000  
24,2,1793.731844  
24,2,2829.105556  
24,2,1711.875000  
24,2,2902.637931  
24,2,2557.617647  
24,2,2003.060096  
24,2,3842.065000  
24,2,4950.031250  
24,2,1992.256098

24,2,2376.237903  
24,2,4291.937500  
24,2,1970.707386  
24,2,2195.136364  
24,2,1658.261905  
24,2,2176.182870  
24,2,1996.297872  
24,2,2305.423469  
24,2,1718.762712  
24,2,1499.583333  
24,2,5337.916667  
24,2,2325.834302  
24,2,2847.633929  
24,2,4063.102273  
24,2,5250.798077  
24,2,1698.057870  
24,2,2089.030000  
24,2,1643.878049  
24,2,2481.069444  
24,2,1826.346939  
24,2,1650.954787  
24,2,2997.750000  
24,2,1920.772727  
24,2,1715.389535  
24,2,2442.250000  
24,2,2496.580645  
24,2,2033.426829  
24,2,6020.052326  
24,2,2027.752273  
24,2,2222.546429  
24,2,3672.811170  
24,2,1856.677419  
24,2,1796.477273  
24,2,3185.063830  
24,2,1897.558824  
24,2,1694.395349  
24,2,1679.522222  
24,2,3664.163265  
24,2,3544.125000  
24,2,1809.702128  
24,2,1747.577778  
24,2,1774.200000  
24,2,2032.119681  
24,2,1771.577778  
24,2,1558.181818  
24,2,1881.360465  
24,2,1606.687500  
24,2,1775.825000  
24,2,2004.048913  
24,2,1866.728448  
24,2,1967.395349  
24,2,3653.562500  
24,2,2900.204082  
24,2,4134.853448  
24,2,1877.892857  
24,2,1646.590278  
24,2,1587.008152  
24,2,2069.132075  
24,2,5177.299419  
24,2,3516.634146  
24,2,2816.762821  
24,2,2002.750000  
24,2,1667.272500  
24,2,2943.251256  
24,2,1966.390909  
24,2,2268.171053

24,2,1773.108696  
24,2,1694.515306  
24,2,4598.331522  
24,2,1500.144231  
24,2,3359.380952  
24,2,2269.691860  
24,2,1817.601562  
24,2,3040.200000  
24,2,1711.277500  
24,2,3182.421053  
24,2,2124.202128  
24,2,2243.820000  
24,2,5259.333333  
24,2,1549.186047  
24,2,4159.931452  
24,2,2138.204082  
24,2,2606.397436  
24,2,1939.948718  
24,2,1726.709184  
24,2,3587.321429  
24,2,4109.062500  
24,2,3393.101064  
24,2,1824.941176  
24,2,1852.085366  
24,2,1712.849057  
24,2,1691.517857  
24,2,5701.060811  
24,2,1689.407738  
24,2,2527.636029  
24,2,2220.098131  
24,2,1850.105263  
24,2,3229.076923  
24,2,2121.091463  
24,2,1700.079268  
24,2,2726.840426  
24,2,6823.763158  
24,2,1951.231707  
24,2,2299.095109  
24,2,1670.693750  
24,2,4451.875000  
24,2,1968.142157  
24,2,1645.531250  
24,2,1741.662791  
24,2,2592.487500  
24,2,3131.348684  
24,2,1623.682927  
24,2,3888.625000  
24,2,4760.235795  
24,2,2278.555288  
24,2,2313.525641  
24,2,2147.156250  
24,2,5489.852083  
24,2,1665.602564  
24,2,2286.913043  
24,2,3543.622727  
24,2,1662.062500  
24,2,5313.714286  
24,2,2048.892308  
24,2,4133.886364  
24,2,7040.532609  
24,2,2010.224490  
24,2,2729.480000  
24,2,2964.739130  
24,2,1748.487805  
24,2,2850.121711  
24,2,2021.350962

24,2,1663.846154  
24,2,1904.851563  
24,2,2800.600543  
24,2,2204.254902  
24,2,1544.875000  
24,2,1995.727749  
24,2,2588.524038  
24,2,1678.993750  
24,2,1874.610294  
24,2,3061.888889  
24,2,1901.446023  
24,2,1851.317073  
24,2,1713.255102  
24,2,2065.163265  
24,2,2028.750000  
24,2,1641.254902  
24,2,3675.946429  
24,2,4867.559211  
24,2,3045.048780  
24,2,3037.851190  
24,2,2222.644737  
24,2,2352.224490  
24,2,2992.016760  
24,2,18600.656250  
24,2,6049.863636  
24,2,1628.000000  
24,2,1638.442308  
24,2,2112.614286  
24,2,2544.312500  
24,2,5846.577778  
24,2,8880.588362  
24,2,1898.098214  
24,2,1768.825000  
24,2,2810.092391  
24,2,2287.000000  
24,2,1719.419643  
24,2,2201.484848  
24,2,9558.277778  
24,2,14534.526316  
24,2,2587.441860  
24,2,2765.250000  
24,2,5273.016892  
24,2,1589.375000  
24,2,1586.400000  
24,2,1570.190217  
24,2,2299.000000  
24,2,2247.775000  
24,2,1521.979167  
24,2,3474.900000  
24,2,2304.625000  
24,2,2822.680000  
24,2,4087.579082  
24,2,4652.823661  
24,2,3623.109091  
24,2,1537.214286  
24,2,2553.491489  
24,2,7580.642857  
24,2,4240.951087  
24,2,1641.619048  
24,2,2172.967742  
24,2,2998.878205  
24,2,1987.604167  
24,2,5467.865000  
24,2,2569.352941  
24,2,4088.260870  
24,2,2662.146341

24,2,1690.224490  
24,2,2353.557143  
24,2,1717.361111  
24,2,1562.852564  
24,2,1706.630000  
24,2,3844.357955  
24,2,1599.602041  
24,2,2743.562500  
24,2,3358.850000  
24,2,5927.291667  
24,2,2849.778409  
24,2,1732.740196  
24,2,5811.818182  
24,2,1834.685714  
24,2,1718.484043  
24,2,4033.698864  
24,2,1700.320312  
24,2,2363.366071  
24,2,1976.802500  
24,2,2411.226744  
24,2,1814.071429  
24,2,6562.491848  
24,2,2305.165000  
24,2,2713.006250  
24,2,2467.625000  
24,2,2075.368056  
24,2,2094.190217  
24,2,1692.480769  
24,2,3667.935185  
24,2,1660.500000  
24,2,2434.585227  
24,2,2321.163265  
24,2,1599.509434  
24,2,2641.571429  
24,2,1797.413462  
24,2,1690.130435  
24,2,2351.565217  
24,2,2089.571429  
24,2,1645.696809  
24,2,1569.835000  
24,2,1749.121951  
24,2,2579.935185  
24,2,1873.762255  
24,2,1530.451613  
24,2,2524.500000  
24,2,2535.625000  
24,2,1872.680000  
24,2,10866.208333  
24,2,5113.691176  
24,2,1975.092105  
24,2,2890.104545  
24,2,1985.114865  
24,2,1887.000000  
24,2,1594.196429  
24,2,3298.490132  
24,2,3424.400000  
24,2,2157.125000  
24,2,1874.317073  
24,2,2373.403846  
24,2,1607.125000  
24,2,4279.500000  
24,2,3737.364865  
24,2,2029.757143  
24,2,4305.085227  
24,2,2859.651042  
24,2,2013.307870

24,2,1757.678125  
24,2,2217.184211  
24,2,1617.263158  
24,2,2430.110714  
24,2,1771.642857  
24,2,1775.275000  
24,2,1917.676471  
24,2,2386.850000  
24,2,9783.657500  
24,2,5361.789773  
24,2,1863.310345  
24,2,2444.963415  
24,2,2133.895833  
24,2,1528.250000  
24,2,2561.258929  
24,2,2687.915625  
24,2,3560.727273  
24,2,2294.562500  
24,2,1804.683824  
24,2,2886.701531  
24,2,2690.530093  
24,2,1701.179487  
24,2,1944.228261  
24,2,2168.088889  
24,2,3253.030303  
24,2,2056.734694  
24,2,1807.202381  
24,2,1637.487500  
24,2,2380.602041  
24,2,1980.882812  
24,2,2325.335648  
24,2,1989.800532  
24,2,1970.203947  
24,2,1539.968750  
24,2,1575.920000  
24,2,1906.665816  
24,2,3181.450000  
24,2,1740.520833  
24,2,2216.339623  
24,2,3538.817500  
24,2,2190.253125  
24,2,1570.925000  
24,2,1599.342995  
24,2,4387.095238  
24,2,4031.243243  
24,2,3449.177885  
24,2,3709.060547  
24,2,1631.271277  
24,2,2473.657895  
24,2,2390.432692  
24,2,1912.769231  
24,2,1804.548387  
24,2,2616.250000  
24,2,2144.150000  
24,2,1872.351974  
24,2,1989.500000  
24,2,1707.309783  
24,2,3396.489583  
24,2,2644.589623  
24,2,1755.533163  
24,2,6432.726415  
24,2,1872.464286  
24,2,1877.341346  
24,2,1932.461957  
24,2,11454.055851  
24,2,1518.720000

24,2,2144.928571  
24,2,2544.940104  
24,2,1984.367347  
24,2,1862.110465  
24,2,8764.894737  
24,2,1931.596354  
24,2,2631.000000  
24,2,3019.589623  
24,2,1621.604167  
24,2,1873.713235  
24,2,1577.092949  
24,2,1512.333333  
24,2,1848.495370  
24,2,2616.556250  
24,2,3017.032143  
24,2,2183.519231  
24,2,2472.730769  
24,2,1667.133523  
24,2,1565.514535  
24,2,1751.778846  
24,2,2642.047222  
24,2,2338.125000  
24,2,3264.615000  
24,2,1945.381410  
24,2,8845.920000  
24,2,1766.593750  
24,2,2025.277778  
24,2,1725.562500  
24,2,1918.878049  
24,2,4528.494318  
24,2,1527.051136  
24,2,1558.071970  
24,2,2270.867647  
24,2,3295.849057  
24,2,5637.290541  
24,2,10730.771875  
24,2,1748.193182  
24,2,2040.681122  
24,2,1651.788462  
24,2,1676.771429  
24,2,1595.369792  
24,2,1995.983333  
24,2,3422.105769  
24,2,2388.420732  
24,2,2516.560000  
24,2,1699.307692  
24,2,2403.762500  
24,2,1896.846591  
24,2,2783.112179  
24,2,2259.778409  
24,2,2276.600000  
24,2,2782.365385  
24,2,2226.052500  
24,2,2403.481481  
24,2,1873.750000  
24,2,1739.877500  
24,2,1935.750000  
24,2,3478.761792  
24,2,7332.395000  
24,2,2300.269231  
24,2,1924.017857  
24,2,2668.395833  
24,2,2310.708333  
24,2,1597.909574  
24,2,1537.536765  
24,2,1739.031250

24,2,1962.631757  
24,2,2338.478261  
24,2,2231.631579  
24,2,2033.750000  
24,2,1896.528571  
24,2,1920.625000  
24,2,5441.766827  
24,2,1988.046196  
24,2,2452.661765  
24,2,2994.770408  
24,2,1504.063830  
24,2,1882.519737  
24,2,1594.063953  
24,2,2180.301887  
24,2,1629.926471  
24,2,3762.410256  
24,2,12384.823529  
24,2,5353.904762  
24,2,1763.850000  
24,2,1516.590909  
24,2,2080.300000  
24,2,3544.333333  
24,2,1608.315217  
24,2,2085.672297  
24,2,2236.802885  
24,2,2917.246429  
24,2,3122.948276  
24,2,1856.875000  
24,2,1738.932500  
24,2,1602.435484  
24,2,1581.000000  
24,2,2272.500000  
24,2,1540.568627  
24,2,1511.015625  
24,2,3373.088889  
24,2,1757.187500  
24,2,3198.348214  
24,2,1605.152174  
24,2,3876.450000  
24,2,1986.056122  
24,2,1730.633929  
24,2,4536.368421  
24,2,1930.190104  
24,2,6677.083333  
24,2,3514.625000  
24,2,4704.433468  
24,2,2440.598837  
24,2,1978.529070  
24,2,4834.080645  
24,2,1544.388587  
24,2,2174.024457  
24,2,1802.496951  
24,2,2157.375000  
24,2,1931.092593  
24,2,1883.876712  
24,2,1858.663462  
24,2,2583.641026  
24,2,2012.935714  
24,2,2629.312500  
24,2,1583.461538  
24,2,3403.656250  
24,2,3731.420000  
24,2,2588.300781  
24,2,1656.117647  
24,2,5623.256696  
24,2,2386.560000

24,2,2002.521739  
24,2,1804.515625  
24,2,1881.092262  
24,2,2217.264706  
24,2,2430.826087  
24,2,2426.154412  
24,2,1927.350000  
24,2,1822.800532  
24,2,3418.420213  
24,2,2080.144172  
24,2,1524.944079  
24,2,1916.405128  
24,2,1716.329609  
24,2,3174.666667  
24,2,2888.163265  
24,2,1811.098958  
24,2,1785.589744  
24,2,1838.002841  
24,2,1812.590278  
24,2,2345.222222  
24,2,5887.424419  
24,2,2035.198718  
24,2,5266.017241  
24,2,1656.120000  
24,2,2041.000000  
24,2,1819.608696  
24,2,1646.464286  
24,2,3830.837500  
24,2,1548.588415  
24,2,2569.388636  
24,2,3114.045139  
24,2,1853.888889  
24,2,1684.553191  
24,2,1721.812500  
24,2,1867.445652  
24,2,1771.202381  
24,2,3586.437500  
24,2,2411.500000  
24,2,1678.500000  
24,2,1797.407609  
24,2,1502.627907  
24,2,1854.807692  
24,2,1740.136905  
24,2,2241.857143  
24,2,2877.628049  
24,2,1978.467742  
24,2,2175.369565  
24,2,1874.630102  
24,2,2015.410000  
24,2,2264.722826  
24,2,2043.997727  
24,2,1511.714286  
24,2,2978.602041  
24,2,2899.292453  
24,2,2000.440104  
24,2,2642.487903  
24,2,3464.125000  
24,2,14167.018750  
24,2,3567.851852  
24,2,3090.867647  
24,2,1682.244186  
24,2,3936.923913  
24,2,2569.647059  
24,2,8351.671196  
24,2,1791.000000  
24,2,1717.130000

24,2,1739.542553  
24,2,2342.391304  
24,2,2994.616071  
24,2,15938.718750  
24,2,2567.101562  
24,2,1760.476974  
24,2,11864.580882  
24,2,1723.464286  
24,2,2213.530769  
24,2,6840.081081  
24,2,1705.504808  
24,2,1505.034483  
24,2,1538.500000  
24,2,1672.593023  
24,2,15946.312500  
24,2,1913.739583  
24,2,2296.085227  
24,2,2357.104167  
24,2,1734.101190  
24,2,2386.796512  
24,2,1554.628378  
24,2,1993.480000  
24,2,1530.560976  
24,2,1623.517442  
24,2,2159.750000  
24,2,1500.586310  
24,2,1995.735577  
24,2,1865.153846  
24,2,2269.201087  
24,2,1808.218750  
24,2,3006.708333  
24,2,2048.100000  
24,2,1609.098039  
24,2,1564.807065  
24,2,2046.039474  
24,2,1897.500000  
24,2,2099.829268  
24,2,2812.227041  
24,2,2094.607143  
24,2,1812.750000  
24,2,2185.447368  
24,2,1874.279070  
24,2,2754.561224  
24,2,6683.276316  
24,2,1608.652500  
24,2,1963.590909  
24,2,2239.027174  
24,2,2578.727941  
24,2,1710.254902  
24,2,1923.289474  
24,2,1717.350446  
24,2,2197.194444  
24,2,2151.678571  
24,2,2950.844444  
24,2,1965.375000  
24,2,1506.761905  
24,2,1921.311275  
24,2,1657.583333  
24,2,1847.821429  
24,2,1568.706395  
24,2,2593.720000  
24,2,1660.621951  
24,2,2097.007653  
24,2,1862.772321  
24,2,2148.122449  
24,2,2917.071429

24,2,2871.161765  
24,2,2446.530172  
24,2,1815.767442  
24,2,1548.625000  
24,2,2168.750000  
24,2,5423.687500  
24,2,1996.707237  
24,2,4824.328571  
24,2,1841.658537  
24,2,1649.561047  
24,2,2026.366071  
24,2,1765.000000  
24,2,1603.786458  
24,2,4218.234375  
24,2,5068.191489  
24,2,2710.419643  
24,2,2355.848837  
24,2,2223.660714  
24,2,3443.905612  
24,2,2785.618421  
24,2,2139.684659  
24,2,1901.428571  
24,2,2805.000000  
24,2,1529.295000  
24,2,2544.050000  
24,2,2062.143519  
24,2,2796.902439  
24,2,2542.750000  
24,2,5151.200000  
24,2,5049.340909  
24,2,2198.098131  
24,2,1775.882500  
24,2,2259.734375  
24,2,8103.885417  
24,2,1934.505208  
24,2,2643.750000  
24,2,2278.466667  
24,2,1872.058511  
24,2,2914.296196  
24,2,1557.410714  
24,2,3331.846154  
24,2,2683.621429  
24,2,1530.393750  
24,2,1923.250000  
24,2,1539.937500  
24,2,2051.538462  
24,2,1992.981250  
24,2,1966.882653  
24,2,1625.242788  
24,2,1717.681818  
24,2,1536.619792  
24,2,2441.090909  
24,2,2606.280612  
24,2,2227.878205  
24,2,6946.762500  
24,2,6760.043478  
24,2,2560.898810  
24,2,1608.529605  
24,2,2049.456522  
24,2,4586.733553  
24,2,2556.778571  
24,2,1865.326531  
24,2,1503.625000  
24,2,6003.163462  
24,2,4813.766304  
24,2,1767.925532

24,2,1858.865566  
24,2,2454.357143  
24,2,1661.242188  
24,2,1621.179487  
24,2,2098.020270  
24,2,1883.040441  
24,2,5595.012500  
24,2,2839.954268  
24,2,1777.127551  
24,2,1970.212766  
24,2,5443.072581  
24,2,1605.828571  
24,2,1745.142857  
24,2,1805.646739  
24,2,1953.889831  
24,2,3249.410714  
24,2,1796.686275  
24,2,2385.439024  
24,2,4067.264706  
24,2,2485.875000  
24,2,4780.000000  
24,2,1837.227941  
24,2,1654.250000  
24,2,1735.430556  
24,2,1719.121951  
24,2,1576.918750  
24,2,2398.571809  
24,2,1619.161458  
24,2,3863.666667  
24,2,2116.520833  
24,2,7608.043605  
24,2,1591.337766  
24,2,1786.000000  
24,2,2264.035714  
24,2,2600.593085  
24,2,1713.997159  
24,2,2252.543478  
24,2,2249.013298  
24,2,2805.852941  
24,2,2058.650000  
24,2,1776.497596  
24,2,2034.964623  
24,2,2659.132075  
24,2,1503.471875  
24,2,1823.731250  
24,2,1701.817500  
24,2,2274.577586  
24,2,2385.960938  
24,2,1499.135638  
24,2,1513.950000  
24,2,1683.662234  
24,2,1729.510638  
24,2,2822.282609  
24,2,1948.510204  
24,2,2175.200000  
24,2,4811.911058  
24,2,1933.922222  
24,2,2470.993902  
24,2,2408.916230  
24,2,1958.705357  
24,2,3140.808511  
24,2,1746.218750  
24,2,1637.959239  
24,2,1948.819444  
24,2,2351.663462  
24,2,1625.356383

24,2,2638.333333  
24,2,1609.325581  
24,2,2741.618421  
24,2,2015.069444  
24,2,1845.785714  
24,2,1838.446809  
24,2,1582.209184  
24,2,3338.593023  
24,2,2363.875000  
24,2,7225.010929  
24,2,2238.782895  
24,2,2487.406250  
24,2,1778.174847  
24,2,1675.333333  
24,2,1963.375000  
24,2,1726.762097  
24,2,1673.230769  
24,2,1730.796875  
24,2,2067.654412  
24,2,5117.319444  
24,2,2063.348837  
24,2,1563.518382  
24,2,1827.253289  
24,2,6082.135714  
24,2,3079.341463  
24,2,2004.867647  
24,2,1537.562500  
24,2,1717.120536  
24,2,2569.464674  
24,2,1847.850000  
24,2,1810.000000  
24,2,2596.205128  
24,2,1550.817073  
24,2,2252.125000  
24,2,2245.709302  
24,2,2905.709302  
24,2,1524.710000  
24,2,1670.843023  
24,2,3750.465909  
24,2,1522.861111  
24,2,2151.856250  
24,2,1823.054348  
24,2,4149.461864  
24,2,3409.556604  
24,2,2296.760870  
24,2,1792.777778  
24,2,1622.303191  
24,2,1589.793478  
24,2,1772.073171  
24,2,2371.204082  
24,2,2010.703488  
24,2,2387.078571  
24,2,2117.726190  
24,2,3958.911765  
24,2,1766.757353  
24,2,2064.564583  
24,2,1717.800000  
24,2,1532.986111  
24,2,6730.711538  
24,2,2321.594595  
24,2,3540.070122  
24,2,1695.466667  
24,2,2170.696429  
24,2,1641.392857  
24,2,3691.562500  
24,2,14508.707317

24,2,1956.627717  
24,2,1504.137500  
24,2,1616.084906  
24,2,3371.750000  
24,2,1662.916667  
24,2,1716.483333  
24,2,4035.473404  
24,2,1588.505556  
24,2,2512.087963  
24,2,2494.583333  
24,2,7362.996429  
24,2,1807.689516  
24,2,2226.989796  
24,2,1654.883065  
24,2,1655.151786  
24,2,1821.629310  
24,2,1632.402597  
24,2,1930.057292  
24,2,1604.629032  
24,2,1560.294118  
24,2,2876.162791  
24,2,2810.687500  
24,2,1510.792553  
24,2,2529.312500  
24,2,1742.782609  
24,2,3497.517241  
24,2,1635.482143  
24,2,4143.897059  
24,2,1810.607143  
24,2,1836.096154  
24,2,1595.333333  
24,2,2218.000000  
24,2,2367.997159  
24,2,9467.773438  
24,2,2332.130435  
24,2,2953.764423  
24,2,2036.900000  
24,2,2067.634146  
24,2,3691.685000  
24,2,2574.206250  
24,2,3549.676339  
24,2,2167.196429  
24,2,2040.208333  
24,2,2451.154545  
24,2,1941.647500  
24,2,1760.804348  
24,2,2953.900000  
24,2,7782.268293  
24,2,2885.666667  
24,2,2546.448529  
24,2,1666.062500  
24,2,3077.372549  
24,2,1762.779070  
24,2,2011.100000  
24,2,2076.508929  
24,2,4159.467857  
24,2,1872.743455  
24,2,4825.588235  
24,2,2435.527174  
24,2,2217.237500  
24,2,3207.826389  
24,2,3876.573171  
24,2,1558.800000  
24,2,2144.483871  
24,2,2552.092105  
24,2,2842.319444

24,2,1869.487500  
24,2,5223.019531  
24,2,1637.875000  
24,2,1746.375000  
24,2,2473.224490  
24,2,5595.310000  
24,2,1947.192308  
24,2,1797.080882  
24,2,1659.125000  
24,2,1838.932065  
24,2,1800.494792  
24,2,1943.181818  
24,2,4886.559322  
24,2,3725.336538  
24,2,2214.278302  
24,2,1606.460000  
24,2,7864.487179  
24,2,1773.731481  
24,2,2624.707317  
24,2,8486.390000  
24,2,2847.066327  
24,2,1593.459302  
24,2,13936.127841  
24,2,2495.166667  
24,2,1571.125000  
24,2,1578.844512  
24,2,3087.428571  
24,2,4891.676647  
24,2,1926.942857  
24,2,2493.855769  
24,2,4164.949219  
24,2,3017.912500  
24,2,8118.625000  
24,2,2203.799107  
24,2,1709.500000  
24,2,7324.416667  
24,2,1638.932432  
24,2,2569.812500  
24,2,2138.927500  
24,2,2127.700000  
24,2,1604.333333  
24,2,1763.120000  
24,2,1650.519084  
24,2,2520.375000  
24,2,2950.609756  
24,2,1623.942857  
24,2,3230.937500  
24,2,1824.186047  
24,2,2887.476852  
24,2,1727.906250  
24,2,1718.078125  
24,2,1728.826087  
24,2,2186.541667  
24,2,1938.714286  
24,2,1516.521875  
24,2,6390.244681  
24,2,3786.972222  
24,2,2068.847561  
24,2,1767.039352  
24,2,3115.463415  
24,2,1891.296512  
24,2,5322.735849  
24,2,2566.300000  
24,2,1527.414352  
24,2,3177.630814  
24,2,1975.525000

24,2,1870.966667  
24,2,1998.632979  
24,2,3088.142857  
24,2,1662.674419  
24,2,3773.864130  
24,2,3779.211538  
24,2,1615.580882  
24,2,2815.492857  
24,2,1593.437500  
24,2,2121.617021  
24,2,2697.250000  
24,2,3103.508475  
24,2,1999.864583  
24,2,1633.737179  
24,2,1820.816038  
24,2,2165.320513  
24,2,3521.029605  
24,2,1554.211538  
24,2,2006.038690  
24,2,1812.456250  
24,2,1598.045732  
24,2,5403.048077  
24,2,1771.086957  
24,2,2058.223837  
24,2,1676.622500  
24,2,1600.960526  
24,2,8484.803571  
24,2,2468.597561  
24,2,1980.038043  
24,2,1605.870968  
24,2,2219.227500  
24,2,3058.154255  
24,2,2163.813953  
24,2,2194.185000  
24,2,2417.857143  
24,2,1511.316667  
24,2,2491.687500  
24,2,3234.607143  
24,2,1759.811047  
24,2,1712.294643  
24,2,2210.250000  
24,2,2021.456633  
24,2,1716.312500  
24,2,2697.776786  
24,2,1537.097656  
24,2,2585.142857  
24,2,2329.336864  
24,2,2595.971875  
24,2,1625.679688  
24,2,1669.817708  
24,2,2067.779070  
24,2,10485.921875  
24,2,2024.977273  
24,2,1978.338942  
24,2,1773.118421  
24,2,2107.911765  
24,2,1775.349490  
24,2,2678.085227  
24,2,2839.021739  
24,2,2690.225000  
24,2,1805.244898  
24,2,1551.296875  
24,2,2932.526042  
24,2,4381.473837  
24,2,1575.275862  
24,2,3731.708333

24,2,2018.925000  
24,2,2356.375000  
24,2,2984.734375  
24,2,1516.655488  
24,2,1967.910256  
24,2,2757.511111  
24,2,2019.038603  
24,2,3245.000000  
24,2,1859.727500  
24,2,6380.977041  
24,2,2846.914894  
24,2,1715.277027  
24,2,2543.444444  
24,2,1963.869565  
24,2,2802.647959  
24,2,2302.278061  
24,2,2471.375000  
24,2,1918.750000  
24,2,4703.315789  
24,2,2940.593750  
24,2,2133.820513  
24,2,1835.542553  
24,2,2238.577778  
24,2,2840.470930  
24,2,2366.525641  
24,2,1936.747549  
24,2,1509.305233  
24,2,2125.298913  
24,2,2910.636646  
24,2,2483.342105  
24,2,2223.596591  
24,2,1612.472222  
24,2,3578.993750  
24,2,1819.000000  
24,2,1940.565217  
24,2,3326.012195  
24,2,3397.600000  
24,2,2741.190000  
24,2,1931.857143  
24,2,1671.475000  
24,2,2820.952381  
24,2,1599.279412  
24,2,2361.731707  
24,2,1558.125000  
24,2,2005.460106  
24,2,1936.883721  
24,2,2280.975000  
24,2,2430.238208  
24,2,1764.386364  
24,2,2564.334906  
24,2,1563.882979  
24,2,1549.932927  
24,2,1831.489362  
24,2,4644.933962  
24,2,1651.610465  
24,2,3377.903846  
24,2,1849.300481  
24,2,1702.927083  
24,2,1862.000000  
24,2,1711.396277  
24,2,2606.878049  
24,2,1550.750000  
24,2,7424.558824  
24,2,1631.500000  
24,2,1558.587838  
24,2,2300.491477

24,2,3184.619355  
24,2,3178.699074  
24,2,1582.395833  
24,2,1679.753049  
24,2,1642.772959  
24,2,2731.682292  
24,2,1501.780488  
24,2,2799.875000  
24,2,1504.137500  
24,2,2121.687500  
24,2,1661.776042  
24,2,2775.593750  
24,2,3106.095238  
24,2,2331.019531  
24,2,2007.395000  
24,2,1613.946429  
24,2,2810.615132  
24,2,1576.128125  
24,2,2017.563679  
24,2,1744.006696  
24,2,2178.829545  
24,2,3619.420000  
24,2,4628.040625  
24,2,1764.241848  
24,2,1756.333333  
24,2,2543.596698  
24,2,5332.845395  
24,2,1567.728723  
24,2,1667.333333  
24,2,2515.135417  
24,2,2033.740000  
24,2,1995.893519  
24,2,4886.922500  
24,2,2968.170000  
24,2,2083.456522  
24,2,1675.196429  
24,2,1860.335937  
24,2,1861.308824  
24,2,1862.633333  
24,2,2079.204545  
24,2,1707.826531  
24,2,1741.071429  
24,2,1622.116279  
24,2,1910.534483  
24,2,4379.929245  
24,2,2058.279070  
24,2,1834.738636  
24,2,1667.677326  
24,2,3253.573529  
24,2,1617.054348  
24,2,4014.246212  
24,2,1743.446875  
24,2,1640.787791  
24,2,3093.333333  
24,2,6628.605263  
24,2,1938.895349  
24,2,1959.277778  
24,2,1670.000000  
24,2,1521.012500  
24,2,1530.586735  
24,2,2075.000000  
24,2,3130.634146  
24,2,1629.978365  
24,2,2879.213235  
24,2,2081.500000  
24,2,3951.269231

24,2,2606.897436  
24,2,2646.114583  
24,2,2017.571429  
24,2,2297.947222  
24,2,2688.310976  
24,2,2574.152778  
24,2,4332.511905  
24,2,2243.282051  
24,2,2683.750000  
24,2,1829.813725  
24,2,1683.000000  
24,2,2441.494898  
24,2,2611.294118  
24,2,1856.882143  
24,2,1805.663462  
24,2,2053.727273  
24,2,2126.285714  
24,2,1950.589744  
24,2,2522.625000  
24,2,3232.355769  
24,2,1790.141447  
24,2,2030.850000  
24,2,2042.625000  
24,2,1945.255000  
24,2,2805.411765  
24,2,1514.969388  
24,2,11520.156977  
24,2,2309.583333  
24,2,1929.861842  
24,2,4960.038462  
24,2,2154.221591  
24,2,1690.166667  
24,2,1542.730978  
24,2,1755.672727  
24,2,2822.756250  
24,2,1502.041667  
24,2,2188.606250  
24,2,3796.107143  
24,2,2138.000000  
24,2,1515.593750  
24,2,4504.333333  
24,2,4029.924242  
24,2,1851.625000  
24,2,1891.856250  
24,2,4137.085366  
24,2,2332.325431  
24,2,1798.491018  
24,2,2247.087500  
24,2,2095.287162  
24,2,1837.505682  
24,2,2961.622222  
24,2,1605.088415  
24,2,2006.335938  
24,2,1533.384146  
24,2,4044.755102  
24,2,1933.265625  
24,2,2262.313725  
24,2,1764.160326  
24,2,1860.857143  
24,2,2664.658537  
24,2,3082.060000  
24,2,2229.184783  
24,2,2389.134615  
24,2,3310.392857  
24,2,2103.279412  
24,2,3911.793269

24,2,12062.865854  
24,2,2023.731250  
24,2,2482.159091  
24,2,1755.209302  
24,2,3498.350000  
24,2,1845.814286  
24,2,1962.729592  
24,2,1737.892500  
24,2,1634.050000  
24,2,1967.463068  
24,2,1587.026442  
24,2,3151.317708  
24,2,2530.969595  
24,2,1618.263587  
24,2,1786.259615  
24,2,6165.485294  
24,2,1765.590625  
24,2,2855.087054  
24,2,1798.165625  
24,2,1580.138021  
24,2,2198.263889  
24,2,1870.737179  
24,2,2534.673913  
24,2,1690.232143  
24,2,3669.107143  
24,2,2336.490909  
24,2,2156.571429  
24,2,3262.521739  
24,2,2053.678571  
24,2,1839.750000  
24,2,12174.525862  
24,2,3689.142857  
24,2,1885.375000  
24,2,2234.569444  
24,2,1983.000000  
24,2,2369.145833  
24,2,2209.000000  
24,2,1735.675000  
24,2,1690.067568  
24,2,3100.000000  
24,2,2706.439286  
24,2,3099.836364  
24,2,2133.198980  
24,2,8991.382353  
24,2,3859.000000  
24,2,1549.190476  
24,2,1921.897727  
24,2,1704.010638  
24,2,1869.699153  
24,2,3215.637500  
24,2,2007.016667  
24,2,2536.005319  
24,2,1776.828488  
24,2,1866.023810  
24,2,2341.665761  
24,2,2043.158537  
24,2,1507.413043  
24,2,2330.052632  
24,2,1882.934375  
24,2,1560.468750  
24,2,2376.974057  
24,2,2209.000000  
24,2,1862.583333  
24,2,2682.027174  
24,2,1540.879902  
24,2,1549.095109

24,2,2598.170213  
24,2,2807.590909  
24,2,2239.823529  
24,2,1647.351064  
24,2,1621.710526  
24,2,1554.911765  
24,2,3065.202128  
24,2,1661.448276  
24,2,1679.607843  
24,2,1859.712500  
24,2,2363.500000  
24,2,2403.695313  
24,2,2374.942308  
24,2,2393.300000  
24,2,2037.455189  
24,2,1621.796053  
24,2,2111.534091  
24,2,2013.401786  
24,2,2571.835937  
24,2,1850.578571  
24,2,3131.870968  
24,2,2426.014706  
24,2,1726.939189  
24,2,1686.304348  
24,2,3043.921875  
24,2,1674.488095  
24,2,2039.050000  
24,2,2592.056604  
24,2,1806.537234  
24,2,1773.480769  
24,2,3891.018443  
24,2,2733.727679  
24,2,3981.076923  
24,2,15118.325581  
24,2,1827.724868  
24,2,2018.972826  
24,2,2136.928191  
24,2,3609.175000  
24,2,1932.977273  
24,2,2440.953947  
24,2,1682.211735  
24,2,1867.591837  
24,2,1960.750000  
24,2,1661.928571  
24,2,2262.834239  
24,2,1944.892500  
24,2,1928.597561  
24,2,1604.833333  
24,2,2556.315000  
24,2,1550.193966  
24,2,1843.833333  
24,2,2010.091346  
24,2,2013.013158  
24,2,1530.684783  
24,2,1562.714286  
24,2,1593.108696  
24,2,1586.000000  
24,2,2119.922619  
24,2,2546.070946  
24,2,3562.959459  
24,2,1697.055000  
24,2,2560.000000  
24,2,1733.702703  
24,2,1878.737981  
24,2,2001.970455  
24,2,1742.858974

24,2,2313.768519  
24,2,1764.932500  
24,2,1599.665000  
24,2,3603.345238  
24,2,3134.406250  
24,2,1761.222222  
24,2,3833.292683  
24,2,1584.687500  
24,2,3631.622159  
24,2,2509.562500  
24,2,1743.628676  
24,2,1819.726415  
24,2,1719.818182  
24,2,3086.758152  
24,2,1518.757500  
24,2,4590.143617  
24,2,2136.185185  
24,2,2859.500000  
24,2,7546.100000  
24,2,2826.447674  
24,2,1711.095745  
24,2,2087.439024  
24,2,1948.829268  
24,2,1979.210227  
24,2,1846.573864  
24,2,1925.182927  
24,2,1568.525735  
24,2,1714.045732  
24,2,1618.027778  
24,2,1582.226415  
24,2,2602.302419  
24,2,7230.356618  
24,2,1514.500000  
24,2,2554.785714  
24,2,1929.980769  
24,2,4067.656915  
24,2,4250.514286  
24,2,1796.793367  
24,2,1595.208333  
24,2,3341.150000  
24,2,1703.935897  
24,2,2185.744681  
24,2,1798.832317  
24,2,9709.593750  
24,2,1536.465909  
24,2,2136.375000  
24,2,3375.046512  
24,2,1654.782209  
24,2,2398.978261  
24,2,2850.211538  
24,2,1698.641892  
24,2,1647.487179  
24,2,2989.406863  
24,2,7030.040816  
24,2,2374.683140  
24,2,1586.940217  
24,2,1873.262821  
24,2,2783.901163  
24,2,1619.315217  
24,2,1913.036585  
24,2,2096.881818  
24,2,1515.571429  
24,2,2258.434524  
24,2,1799.256579  
24,2,1749.233333  
24,2,1657.368590

24,2,2135.000000  
24,2,1968.783854  
24,2,1575.541096  
24,2,3730.234375  
24,2,1710.550000  
24,2,1681.268293  
24,2,2142.079787  
24,2,8336.778125  
24,2,1795.450000  
24,2,1962.142857  
24,2,2619.303571  
24,2,5237.060811  
24,2,1705.810811  
24,2,1811.852564  
24,2,2132.428571  
24,2,1657.363128  
24,2,2929.922500  
24,2,1602.763514  
24,2,1778.052632  
24,2,1620.189189  
24,2,2079.647500  
24,2,4388.981481  
24,2,1500.391892  
24,2,2161.680556  
24,2,1529.760714  
24,2,3384.750000  
24,2,3373.713889  
24,2,1653.411765  
24,2,2365.628125  
24,2,1877.351351  
24,2,1899.317308  
24,2,1609.830556  
24,2,1673.668919  
24,2,1518.236111  
24,2,2479.352564  
24,2,1657.377660  
24,2,4185.385204  
24,2,1920.312500  
24,2,5112.113636  
24,2,1887.879902  
24,2,3010.281250  
24,2,9801.000000  
24,2,2095.714286  
24,2,4603.434211  
24,2,2568.941176  
24,2,2160.269886  
24,2,2268.145833  
24,2,2276.300000  
24,2,4929.194149  
24,2,1829.491379  
24,2,3261.300000  
24,2,1959.469388  
24,2,1767.476190  
24,2,1837.441667  
24,2,2623.848404  
24,2,2551.792453  
24,2,1887.066176  
24,2,2207.102941  
24,2,4410.840909  
24,2,2833.545213  
24,2,1979.313889  
24,2,2217.312500  
24,2,1949.500000  
24,2,2697.292683  
24,2,2888.695122  
24,2,2233.901786

24,2,3030.090426  
24,2,4514.038889  
24,2,11014.750000  
24,2,1503.406250  
24,2,1521.900000  
24,2,1908.377717  
24,2,3050.520833  
24,2,1654.921569  
24,2,1783.257143  
24,2,2070.523810  
24,2,1623.737179  
24,2,2403.850000  
24,2,2003.970588  
24,2,1704.000000  
24,2,2923.744898  
24,2,1569.011364  
24,2,1658.468085  
24,2,2502.627660  
24,2,5622.654605  
24,2,1909.202586  
24,2,1784.330000  
24,2,2933.656250  
24,2,1787.721154  
24,2,2416.863208  
24,2,2259.365625  
24,2,1736.350000  
24,2,1726.334459  
24,2,1804.372093  
24,2,2047.957386  
24,2,3082.510417  
24,2,3392.153061  
24,2,1842.244186  
24,2,1799.173469  
24,2,1826.830645  
24,2,1593.674419  
24,2,1928.572917  
24,2,1669.609375  
24,2,3404.684211  
24,2,1564.547794  
24,2,1542.478261  
24,2,2481.291667  
24,2,2066.514706  
24,2,1716.404018  
24,2,7267.534375  
24,2,8332.000000  
24,2,1951.182927  
24,2,2387.742347  
24,2,2151.121951  
24,2,1507.616279  
24,2,1719.692708  
24,2,1614.053571  
24,2,2024.685811  
24,2,2643.021277  
24,2,1825.615385  
24,2,1576.443548  
24,2,1683.250000  
24,2,1509.025510  
24,2,1510.833333  
24,2,2291.775510  
24,2,1644.186047  
24,2,2391.895833  
24,2,2652.000000  
24,2,1833.697674  
24,2,1684.023810  
24,2,12061.916667  
24,2,1611.784091

24,2,2213.420918  
24,2,2034.979167  
24,2,1844.875000  
24,2,1992.531250  
24,2,1927.568878  
24,2,1579.601064  
24,2,1762.475000  
24,2,1869.890957  
24,2,8997.209040  
24,2,2157.588235  
24,2,6561.122951  
24,2,1753.562500  
24,2,1568.115385  
24,2,4506.789744  
24,2,1508.558824  
24,2,2825.471698  
24,2,1912.734375  
24,2,2304.143750  
24,2,1536.587766  
24,2,2081.635135  
24,2,1725.618750  
24,2,2558.865000  
24,2,2300.317568  
24,2,3026.293269  
24,2,2354.980392  
24,2,2148.653846  
24,2,2052.976293  
24,2,1802.137821  
24,2,1605.940625  
24,2,2443.166667  
24,2,2318.207317  
24,2,2702.435714  
24,2,2297.921875  
24,2,1786.434375  
24,2,2976.770833  
24,2,2350.723684  
24,2,3082.826087  
24,2,1788.625000  
24,2,1873.500000  
24,2,2921.117647  
24,2,2087.964286  
24,2,12961.984043  
24,2,2896.250000  
24,2,2040.315000  
24,2,2093.195122  
24,2,1600.580189  
24,2,2937.800000  
24,2,2034.790816  
24,2,1512.138298  
24,2,1684.600000  
24,2,2336.583333  
24,2,1508.900000  
24,2,1815.125000  
24,2,2142.518382  
24,2,1515.253049  
24,2,1700.450000  
24,2,3180.200000  
24,2,3972.190476  
24,2,1758.662500  
24,2,2489.416667  
24,2,5633.944444  
24,2,1989.513889  
24,2,1550.525000  
24,2,1502.736111  
24,2,2692.365854  
24,2,5737.566176

24,2,4527.560606  
24,2,2684.597458  
24,2,2938.937500  
24,2,1804.157895  
24,2,2892.637255  
24,2,1803.980769  
24,2,2125.519608  
24,2,1705.272727  
24,2,3195.942857  
24,2,1682.700000  
24,2,2652.794643  
24,2,2808.127273  
24,2,3025.750000  
24,2,2740.961957  
24,2,1639.934783  
24,2,1683.011905  
24,2,4184.465426  
24,2,1663.632653  
24,2,1501.308673  
24,2,1625.011364  
24,2,1684.615385  
24,2,1575.117647  
24,2,1592.114796  
24,2,2451.834239  
24,2,2908.267045  
24,2,6256.135135  
24,2,5096.795000  
24,2,1884.247727  
24,2,2028.913462  
24,2,3133.388889  
24,2,2128.638298  
24,2,1717.525641  
24,2,1783.120000  
24,2,2324.919872  
24,2,2458.390625  
24,2,2048.477564  
24,2,1587.468085  
24,2,1810.035326  
24,2,3339.625000  
24,2,1509.750000  
24,2,2347.714286  
24,2,2267.854167  
24,2,2376.840625  
24,2,5242.411765  
24,2,1950.327830  
24,2,1715.773585  
24,2,1568.851562  
24,2,1648.459302  
24,2,9211.521277  
24,2,6004.612245  
24,2,2574.418919  
24,2,1799.532609  
24,2,2591.615385  
24,2,2276.796875  
24,2,2017.974359  
24,2,3868.268868  
24,2,1695.333333  
24,2,2847.752212  
24,2,1909.436047  
24,2,2760.723684  
24,2,2309.158163  
24,2,1615.070312  
24,2,1748.222222  
24,2,12177.025000  
24,2,2031.812500  
24,2,1766.211111

24,2,4487.149390  
24,2,2470.170000  
24,2,1510.730769  
24,2,2045.095745  
24,2,1547.062500  
24,2,4575.295455  
24,2,3701.538462  
24,2,1730.585366  
24,2,3181.962766  
24,2,2896.240196  
24,2,1554.955357  
24,2,1589.111111  
24,2,2791.250000  
24,2,3297.006944  
24,2,1517.388298  
24,2,1573.674419  
24,2,3333.939394  
24,2,2156.763889  
24,2,1846.181818  
24,2,3787.224265  
24,2,1569.511628  
24,2,1738.320513  
24,2,3326.915094  
24,2,8797.683594  
24,2,3261.243902  
24,2,1736.770833  
24,2,5246.239130  
24,2,1789.766304  
24,2,3901.065217  
24,2,2353.084559  
24,2,2195.271739  
24,2,2436.901596  
24,2,2204.306818  
24,2,3506.708333  
24,2,1574.921875  
24,2,2037.304878  
24,2,2123.758621  
24,2,3446.286458  
24,2,1630.933824  
24,2,2217.854167  
24,2,2525.912500  
24,2,7281.763021  
24,2,1850.375000  
24,2,2222.167453  
24,2,2130.470588  
24,2,1817.232558  
24,2,1804.363636  
24,2,2176.285714  
24,2,2293.875000  
24,2,2391.915761  
24,2,12828.489362  
24,2,1554.191667  
24,2,1532.689394  
24,2,12578.480469  
24,2,2173.528302  
24,2,4793.656863  
24,2,1767.317308  
24,2,4392.537879  
24,2,2182.848958  
24,2,1619.136905  
24,2,2469.132353  
24,2,1542.473958  
24,2,2115.666667  
24,2,3907.842105  
24,2,1567.987981  
24,2,1683.372596

24,2,2615.241071  
24,2,3079.365625  
24,2,2457.597561  
24,2,1854.836735  
24,2,2367.390000  
24,2,3715.683140  
24,2,1587.955556  
24,2,2026.897059  
24,2,1738.000000  
24,2,2263.508721  
24,2,2454.790441  
24,2,2986.714286  
24,2,2068.730769  
24,2,1798.349432  
24,2,1732.661458  
24,2,2522.922872  
24,2,1710.778409  
24,2,1794.050000  
24,2,1692.055556  
24,2,2618.352941  
24,2,3592.105000  
24,2,1570.166667  
24,2,2102.243056  
24,2,1726.630435  
24,2,2104.225806  
24,2,3612.500000  
24,2,1783.620000  
24,2,2266.396739  
24,2,1593.743902  
24,2,3880.927083  
24,2,1953.493902  
24,2,3311.586957  
24,2,1747.070000  
24,2,2507.461735  
24,2,1804.412500  
24,2,2931.828125  
24,2,1637.750000  
24,2,3162.568548  
24,2,1866.756579  
24,2,2442.904255  
24,2,2641.681818  
24,2,1523.812500  
24,2,8804.350000  
24,2,3291.367788  
24,2,1995.222826  
24,2,1621.875000  
24,2,1571.191176  
24,2,3848.755435  
24,2,1569.703125  
24,2,4179.172619  
24,2,1596.089912  
24,2,3346.656250  
24,2,1502.676471  
24,2,2226.562500  
24,2,4489.500000  
24,2,10390.166667  
24,2,2105.423077  
24,2,2838.984375  
24,2,4244.856383  
24,2,1579.928571  
24,2,2929.465116  
24,2,1516.000000  
24,2,1678.050847  
24,2,2087.477941  
24,2,2706.555147  
24,2,4039.582386

24,2,3879.008772  
24,2,1865.062500  
24,2,1975.922297  
24,2,3018.603774  
24,2,1503.701220  
24,2,2308.397959  
24,2,4488.342262  
24,2,1512.975610  
24,2,1504.406250  
24,2,3114.166667  
24,2,3014.782895  
24,2,2163.150000  
24,2,2169.416667  
24,2,1670.833333  
24,2,6146.250000  
24,2,2434.543919  
24,2,2321.659314  
24,2,1932.521635  
24,2,1824.104651  
24,2,2102.351064  
24,2,2832.218750  
24,2,3419.891892  
24,2,2029.040816  
24,2,1738.197674  
24,2,1855.857143  
24,2,1523.081250  
24,2,2143.136905  
24,2,2925.000000  
24,2,2184.142857  
24,2,1745.292553  
24,2,1596.548077  
24,2,1557.156250  
24,2,1779.117647  
24,2,1677.666667  
24,2,1797.536585  
24,2,3533.357143  
24,2,1523.933333  
24,2,7047.506757  
24,2,1562.402439  
24,2,1577.852500  
24,2,2080.937500  
24,2,3161.612500  
24,2,1719.994792  
24,2,1584.571429  
24,2,1838.142857  
24,2,2079.909091  
24,2,2127.844444  
24,2,2209.725000  
24,2,1542.708333  
24,2,1569.096591  
24,2,1531.027778  
24,2,1667.739583  
24,2,2130.036585  
24,2,2031.315625  
24,2,2191.636792  
24,2,2593.698529  
24,2,3011.778061  
24,2,2033.006410  
24,2,2466.032258  
24,2,1936.054688  
24,2,2025.157895  
24,2,1977.429688  
24,2,1505.914634  
24,2,1860.634375  
24,2,3490.593023  
24,2,2499.807500

24,2,5600.640625  
24,2,1582.841837  
24,2,2699.300000  
24,2,1984.886905  
24,2,4227.496951  
24,2,2055.659091  
24,2,2235.346591  
24,2,5036.355159  
24,2,1606.840625  
24,2,1840.500000  
24,2,2383.080000  
24,2,1920.184783  
24,2,2304.087500  
24,2,2167.250000  
24,2,1534.922500  
24,2,1858.640625  
24,2,1563.921569  
24,2,2858.771739  
24,2,1964.375000  
24,2,1852.375000  
24,2,2007.027778  
24,2,2819.688623  
24,2,1652.029545  
24,2,6435.805556  
24,2,1545.242347  
24,2,2161.658537  
24,2,1796.953125  
24,2,2519.951220  
24,2,3113.500000  
24,2,1854.237500  
24,2,1679.785714  
24,2,1709.410714  
24,2,3631.039773  
24,2,1902.180233  
24,2,3193.736842  
24,2,1634.984694  
24,2,1751.450000  
24,2,1861.018293  
24,2,1717.812500  
24,2,4379.440000  
24,2,2633.599537  
24,2,1676.271739  
24,2,2054.375000  
24,2,2232.147436  
24,2,4004.731707  
24,2,2983.521226  
24,2,1604.777778  
24,2,1958.818182  
24,2,2096.067073  
24,2,3232.975000  
24,2,3223.000000  
24,2,3048.613636  
24,2,2438.500000  
24,2,3733.733696  
24,2,1546.941176  
24,2,1762.756757  
24,2,1753.851562  
24,2,1552.444444  
24,2,2106.469388  
24,2,12707.277439  
24,2,1639.576705  
24,2,4567.295455  
24,2,1596.168605  
24,2,1970.585106  
24,2,2110.600000  
24,2,2521.500000

24,2,1823.356771  
24,2,5125.151316  
24,2,3381.200000  
24,2,2240.364583  
24,2,2469.505814  
24,2,2476.460000  
24,2,1506.238971  
24,2,1709.648936  
24,2,2293.710227  
24,2,2708.500000  
24,2,7927.270833  
24,2,1822.900000  
24,2,2464.209052  
24,2,1540.875000  
24,2,5873.897959  
24,2,2127.170732  
24,2,1515.913043  
24,2,1829.409091  
24,2,2234.114130  
24,2,1590.723837  
24,2,2307.333333  
24,2,1912.857143  
24,2,1988.000000  
24,2,1786.848039  
24,2,13382.375000  
24,2,2480.375000  
24,2,1712.227273  
24,2,1587.625000  
24,2,1706.541667  
24,2,2339.147436  
24,2,1528.500000  
24,2,1704.193452  
24,2,1706.336207  
24,2,7740.246875  
24,2,2109.120000  
24,2,2866.457386  
24,2,3100.555215  
24,2,1554.995327  
24,2,2299.059748  
24,2,1611.234375  
24,2,2062.992647  
24,2,2351.000000  
24,2,3951.406250  
24,2,1889.567308  
24,2,5266.161364  
24,2,2180.133333  
24,2,2539.349359  
24,2,1695.450658  
24,2,2181.901786  
24,2,2033.377778  
24,2,1597.306818  
24,2,9563.390625  
24,2,2272.738095  
24,2,1669.535714  
24,2,2017.586957  
24,2,2340.069767  
24,2,2525.630208  
24,2,1533.955882  
24,2,1577.590909  
24,2,2252.627451  
24,2,2353.909091  
24,2,2157.610577  
24,2,2485.573171  
24,2,1598.270000  
24,2,1591.272059  
24,2,1603.445513

24,2,2641.916667  
24,2,1943.170213  
24,2,3677.798077  
24,2,1864.073171  
24,2,1958.175000  
24,2,1906.750000  
24,2,1547.950000  
24,2,1579.125000  
24,2,1695.548077  
24,2,3495.707237  
24,2,2039.056122  
24,2,2457.750000  
24,2,1546.384615  
24,2,2295.837500  
24,2,2496.150943  
24,2,2958.937500  
24,2,1598.851064  
24,2,5480.092262  
24,2,2184.291667  
24,2,1865.159091  
24,2,2659.661017  
24,2,1643.250000  
24,2,2053.021552  
24,2,2535.365854  
24,2,2875.665761  
24,2,1776.380208  
24,2,1562.267442  
24,2,1799.541667  
24,2,4044.418750  
24,2,1713.986702  
24,2,2347.871951  
24,2,1967.367647  
24,2,1630.750000  
24,2,2792.644022  
24,2,1506.142857  
24,2,1771.433511  
24,2,1543.300000  
24,2,2190.421053  
24,2,1942.500000  
24,2,1879.704545  
24,2,1793.266332  
24,2,1603.865854  
24,2,2018.566327  
24,2,1836.086538  
24,2,1529.403409  
24,2,1821.204082  
24,2,1872.593750  
24,2,1888.595588  
24,2,1801.326087  
24,2,1537.529412  
24,2,1562.696809  
24,2,1519.909091  
24,2,1698.786585  
24,2,1777.127841  
24,2,2236.060096  
24,2,1978.772321  
24,2,2295.811594  
24,2,1686.250000  
24,2,2328.798780  
24,2,2336.162162  
24,2,5147.799020  
24,2,1695.657609  
24,2,3564.950820  
24,2,1681.127551  
24,2,2120.375000  
24,2,2014.451923

24,2,2485.173077  
24,2,2341.576923  
24,2,1537.806250  
24,2,4926.565217  
24,2,1855.608333  
24,2,2637.127604  
24,2,2288.366667  
24,2,2760.500000  
24,2,2894.879630  
24,2,1719.562500  
24,2,1704.750000  
24,2,2797.943396  
24,2,2137.465686  
24,2,2800.390244  
24,2,1709.735294  
24,2,1819.035714  
24,2,1802.108108  
24,2,1809.797872  
24,2,3856.000000  
24,2,1760.043367  
24,2,1702.646226  
24,2,3422.678571  
24,2,3405.330882  
24,2,1725.290323  
24,2,3704.569444  
24,2,4865.840909  
24,2,3388.691176  
24,2,2641.696809  
24,2,1821.039773  
24,2,1928.638298  
24,2,2134.976744  
24,2,1932.218023  
24,2,1804.523026  
24,2,1880.586957  
24,2,1722.916667  
24,2,1857.635870  
24,2,1666.350000  
24,2,1736.603659  
24,2,1835.478261  
24,2,2811.859375  
24,2,2416.631356  
24,2,1937.843750  
24,2,2375.793269  
24,2,2032.237981  
24,2,1703.047500  
24,2,3662.533854  
24,2,3651.394231  
24,2,5586.366071  
24,2,1962.894231  
24,2,1510.671875  
24,2,5689.684211  
24,2,1660.300000  
24,2,1814.086207  
24,2,1650.231132  
24,2,1885.482558  
24,2,1632.678571  
24,2,2311.997596  
24,2,1655.000000  
24,2,1511.357143  
24,2,3590.352941  
24,2,2882.669643  
24,2,1774.250000  
24,2,1772.276596  
24,2,2316.714286  
24,2,2762.421875  
24,2,2068.964286

24,2,1955.720588  
24,2,2411.160000  
24,2,2509.074324  
24,2,1833.648438  
24,2,1539.200000  
24,2,2088.650943  
24,2,2947.595745  
24,2,3667.366848  
24,2,2860.842105  
24,2,8842.710526  
24,2,1932.239130  
24,2,2510.300000  
24,2,7145.171569  
24,2,3352.418605  
24,2,2540.276596  
24,2,2952.256039  
24,2,1724.925000  
24,2,1654.406250  
24,2,2692.555556  
24,2,1615.416667  
24,2,3033.905172  
24,2,1904.500000  
24,2,4279.877551  
24,2,3572.717391  
24,2,2369.834459  
24,2,1660.173077  
24,2,1980.407609  
24,2,2321.069767  
24,2,2125.400000  
24,2,1692.666667  
24,2,2217.307692  
24,2,1767.311111  
24,2,1717.013889  
24,2,2880.142857  
24,2,4406.570000  
24,2,2103.840278  
24,2,7848.125000  
24,2,1953.446809  
24,2,3490.342672  
24,2,2363.738636  
24,2,2946.494565  
24,2,3121.052632  
24,2,3858.707317  
24,2,4018.683333  
24,2,1631.706250  
24,2,2118.140625  
24,2,1835.017045  
24,2,1731.989796  
24,2,3976.616071  
24,2,2396.375000  
24,2,2189.306818  
24,2,1656.564815  
24,2,2162.586538  
24,2,1779.310096  
24,2,2085.357143  
24,2,4321.015957  
24,2,1687.677083  
24,2,7310.578125  
24,2,1969.660714  
24,2,1562.529412  
24,2,2228.500000  
24,2,1582.918103  
24,2,2336.345588  
24,2,4552.583333  
24,2,2661.857143  
24,2,2201.254808

24,2,2814.031250  
24,2,3872.457317  
24,2,2285.493827  
24,2,1773.323171  
24,2,1707.166667  
24,2,1753.084459  
24,2,1744.083333  
24,2,2945.292683  
24,2,2926.033333  
24,2,2552.046875  
24,2,2088.608108  
24,2,2115.000000  
24,2,3116.030000  
24,2,2156.937500  
24,2,4031.848684  
24,2,2446.536058  
24,2,1805.363636  
24,2,1547.480769  
24,2,2852.595109  
24,2,1557.000000  
24,2,1777.505435  
24,2,1510.966981  
24,2,1666.261905  
24,2,2857.812500  
24,2,1931.735465  
24,2,4140.173469  
24,2,1960.200000  
24,2,1854.633929  
24,2,2876.800000  
24,2,2576.251232  
24,2,1870.581633  
24,2,1500.500000  
24,2,2578.250000  
24,2,1937.619048  
24,2,2123.635204  
24,2,1545.166667  
24,2,1941.395408  
24,2,2080.534884  
24,2,2988.391667  
24,2,2186.666667  
24,2,15683.666667  
24,2,1544.425532  
24,2,19132.355263  
24,2,1754.489583  
24,2,6248.058824  
24,2,2655.085784  
24,2,2217.136364  
24,2,5321.398585  
24,2,1909.618421  
24,2,19743.040441  
24,2,1581.140625  
24,2,1908.523026  
24,2,1917.125000  
24,2,1787.482143  
24,2,2001.953125  
24,2,2771.307692  
24,2,1737.756098  
24,2,2924.506410  
24,2,3471.068182  
24,2,1502.825581  
24,2,1532.666667  
24,2,2429.062500  
24,2,2228.945652  
24,2,1610.105263  
24,2,1630.872159  
24,2,2858.214286

24,2,1727.880000  
24,2,2527.416667  
24,2,2677.497642  
24,2,3094.132979  
24,2,1724.851415  
24,2,1682.239583  
24,2,1598.990625  
24,2,2150.829545  
24,2,1927.937500  
24,2,1618.152466  
24,2,3142.700980  
24,2,2345.769231  
24,2,1715.003049  
24,2,1551.218085  
24,2,1592.605263  
24,2,1644.967857  
24,2,1967.722222  
24,2,2674.454741  
24,2,1501.035714  
24,2,1945.771552  
24,2,1681.528846  
24,2,5343.437500  
24,2,4461.242187  
24,2,2737.172872  
24,2,6508.187500  
24,2,3653.201923  
24,2,1839.198529  
24,2,3271.938776  
24,2,2185.368902  
24,2,3469.227041  
24,2,1580.619048  
24,2,2143.105263  
24,2,1769.644231  
24,2,6466.012500  
24,2,1702.324519  
24,2,2413.341346  
24,2,1556.714286  
24,2,2590.111111  
24,2,2227.884615  
24,2,2658.205128  
24,2,2007.198529  
24,2,1786.581395  
24,2,3350.026163  
24,2,1824.411458  
24,2,1512.613372  
24,2,1632.772222  
24,2,6398.385246  
24,2,3489.127551  
24,2,2076.728774  
24,2,1686.880000  
24,2,2083.500000  
24,2,2401.321429  
24,2,2194.707317  
24,2,1684.769231  
24,2,1634.908333  
24,2,2514.146277  
24,2,3077.109091  
24,2,1779.410000  
24,2,2428.581818  
24,2,2293.359375  
24,2,2751.197115  
24,2,4600.138889  
24,2,1737.558673  
24,2,3560.804878  
24,2,6154.781250  
24,2,2040.406250

24,2,2063.186404  
24,2,1958.660000  
24,2,3916.347826  
24,2,1878.323276  
24,2,2915.924342  
24,2,1765.897959  
24,2,1504.516667  
24,2,5271.224490  
24,2,2046.860465  
24,2,3999.056818  
24,2,1932.772727  
24,2,2413.593750  
24,2,2084.360577  
24,2,1499.969388  
24,2,1580.272059  
24,2,1921.354167  
24,2,1819.166667  
24,2,2385.982143  
24,2,1597.801471  
24,2,1839.877193  
24,2,3411.292500  
24,2,2044.681818  
24,2,2038.042614  
24,2,1499.714286  
24,2,1509.607143  
24,2,1533.058824  
24,2,1880.744444  
24,2,1999.916667  
24,2,1546.376884  
24,2,2404.945946  
24,2,1999.375000  
24,2,2499.902439  
24,2,2443.691489  
24,2,5454.215426  
24,2,6229.052778  
24,2,1570.700000  
24,2,1914.108108  
24,2,5086.328947  
24,2,2540.000000  
24,2,2323.595745  
24,2,2111.625000  
24,2,2297.888889  
24,2,2412.452703  
24,2,4243.517241  
24,2,1641.315000  
24,2,1611.197368  
24,2,2174.333333  
24,2,1766.482558  
24,2,2750.340116  
24,2,3650.238636  
24,2,1938.392157  
24,2,2372.990385  
24,2,1822.361702  
24,2,6882.702381  
24,2,2125.743304  
24,2,1536.505556  
24,2,2249.451389  
24,2,4066.089623  
24,2,2352.204545  
24,2,1801.057065  
24,2,2655.035714  
24,2,2209.772727  
24,2,1781.680233  
24,2,2226.782609  
24,2,3319.942308  
24,2,1499.059375

24,2,2116.019231  
24,2,2930.260870  
24,2,5348.093023  
24,2,2629.717105  
24,2,1607.675000  
24,2,6613.307692  
24,2,3385.500000  
24,2,2458.083333  
24,2,2254.416667  
24,2,2233.215625  
24,2,1671.404255  
24,2,1854.576087  
24,2,3164.884615  
24,2,2711.185000  
24,2,2049.530405  
24,2,1573.333333  
24,2,1703.872024  
24,2,2590.464286  
24,2,2929.867788  
24,2,2879.218750  
24,2,1808.305233  
24,2,4157.540816  
24,2,2267.668478  
24,2,1585.906250  
24,2,1612.761905  
24,2,1980.244565  
24,2,2347.437500  
24,2,1504.349490  
24,2,1832.947917  
24,2,2898.769231  
24,2,1701.444444  
24,2,1886.976562  
24,2,1945.161932  
24,2,6123.166667  
24,2,1539.585714  
24,2,1709.451220  
24,2,1595.519231  
24,2,2378.722222  
24,2,5761.627717  
24,2,2764.386364  
24,2,1820.516026  
24,2,2753.326389  
24,2,2031.000000  
24,2,2158.189189  
24,2,3903.288690  
24,2,1676.353774  
24,2,2216.034375  
24,2,2348.341216  
24,2,9061.648585  
24,2,2390.150000  
24,2,1756.303922  
24,2,3972.945455  
24,2,2605.018750  
24,2,2222.178977  
24,2,2210.642857  
24,2,1700.547170  
24,2,2241.281250  
24,2,7803.391447  
24,2,2100.596774  
24,2,3635.000000  
24,2,2087.418478  
24,2,1722.316964  
24,2,1709.846154  
24,2,2836.674419  
24,2,1905.783784  
24,2,2910.522059

24,2,2669.278409  
24,2,2396.937500  
24,2,1618.950658  
24,2,2748.524390  
24,2,2063.970588  
24,2,2199.219444  
24,2,3001.955556  
24,2,2397.223214  
24,2,2093.754237  
24,2,5511.613372  
24,2,1950.095238  
24,2,1776.291667  
24,2,2605.712054

Table S1 B) Intensity recorded for peptide NLS-alpha-CE on MATa and MATalpha cells. MATa recordings correspond with odd Time numbers, and MATalpha with even Time numbers

Time,GroupByColor,Intensity

1,1,1676.875000  
1,1,3710.336538  
1,1,30623.134146  
1,1,2598.895349  
1,1,1888.300000  
1,1,3021.195513  
1,1,1584.239583  
1,1,9160.490625  
1,1,83743.326923  
1,1,1618.116477  
1,1,4466.380814  
1,1,10945.911765  
1,1,1525.451220  
1,1,42763.820122  
1,1,4395.460526  
1,1,3379.822368  
1,1,1572.208333  
1,1,7716.968750  
1,1,34489.689189  
1,1,4490.738426  
1,1,4236.010870  
1,1,2013.947368  
1,1,4285.689394  
1,1,10259.875000  
1,1,3084.826087  
1,1,3000.625000  
1,1,8298.184028  
1,1,2931.800000  
1,1,2915.000000  
1,1,12215.052273  
1,1,2183.478659  
1,1,2355.292553  
1,1,1564.476744  
1,1,5775.648936  
1,1,1761.770408  
1,1,1678.750000  
1,1,3516.937500  
1,1,17391.648707  
1,1,1694.960526  
1,1,3536.617021  
1,1,1689.000000  
1,1,51235.333333  
1,1,10072.181818  
1,1,10188.718750  
1,1,2991.750000  
1,1,2037.226563  
1,1,5751.229167  
1,1,13869.789773  
1,1,1917.142045

1,1,7003.802469  
1,1,4909.672222  
1,1,8408.326087  
1,1,2151.292614  
1,1,9931.201531  
1,1,5452.000000  
1,1,4243.744624  
1,1,7161.930233  
1,1,2732.375000  
1,1,8552.418301  
1,1,5518.765060  
1,1,4418.408854  
1,1,4830.384615  
1,1,1994.260234  
1,1,37735.505882  
1,1,112283.737805  
1,1,6831.315217  
1,1,8919.697368  
1,1,1558.919118  
1,1,10172.562500  
1,1,1727.809524  
1,1,2020.082447  
1,1,1727.197674  
1,1,1672.367188  
1,1,3797.511628  
1,1,1571.191667  
1,1,6886.130435  
1,1,7211.431818  
1,1,11029.545455  
1,1,2719.960526  
1,1,1506.727273  
1,1,2411.952128  
1,1,10078.863636  
1,1,4307.508929  
1,1,2252.266667  
1,1,16984.000000  
1,1,6831.840909  
1,1,2727.604651  
1,1,7930.381250  
1,1,1934.585938  
1,1,2301.500000  
1,1,3916.057143  
1,1,4556.945946  
1,1,1905.416667  
1,1,2591.555556  
1,1,1524.997024  
1,1,6584.934783  
1,1,3198.060000  
1,1,2836.312139  
1,1,8342.600000  
1,1,4504.910714  
1,1,6047.875000  
1,1,74946.100000  
1,1,28061.229167  
1,1,1615.730978  
1,1,2630.358333  
1,1,4620.145349  
1,1,3422.788889  
1,1,1890.532895  
1,1,4005.085714  
1,1,8255.106061  
1,1,2009.547486  
1,1,2583.946809  
1,1,2166.766667  
1,1,4279.633523  
1,1,2478.927326

1,1,5391.787234  
1,1,1954.149425  
1,1,2541.250000  
1,1,6313.176471  
1,1,1620.085938  
1,1,4176.157258  
1,1,3062.659091  
1,1,2963.384615  
1,1,3896.875000  
1,1,2803.062500  
1,1,7447.920000  
1,1,1694.494318  
1,1,3132.611111  
1,1,4113.070312  
1,1,3553.670213  
1,1,4277.364865  
1,1,1923.875000  
1,1,2069.855346  
1,1,6505.775253  
1,1,5579.515152  
1,1,4496.273810  
1,1,14378.544444  
1,1,2571.593750  
1,1,19936.468085  
1,1,3239.900000  
1,1,6045.523810  
1,1,2799.386364  
1,1,2615.229167  
1,1,3927.205357  
1,1,17267.179487  
1,1,2879.338889  
1,1,1769.942073  
1,1,1748.471154  
1,1,3646.062500  
1,1,9031.919444  
1,1,7276.508523  
1,1,5080.682432  
1,1,1668.428030  
1,1,4543.937500  
1,1,2169.987179  
1,1,2920.836957  
1,1,2999.966667  
1,1,2177.884146  
1,1,1780.791667  
1,1,7485.846591  
1,1,60324.460938  
1,1,1696.562500  
1,1,3600.609649  
1,1,5397.349057  
1,1,2034.584239  
1,1,1716.817073  
1,1,1639.135135  
1,1,2397.735000  
1,1,3941.634146  
1,1,2249.174419  
1,1,2260.851852  
1,1,2533.794872  
1,1,2801.469388  
1,1,7736.462963  
1,1,2261.712766  
1,1,36852.521429  
1,1,40570.703125  
1,1,5012.153409  
1,1,1559.875000  
1,1,17554.785256  
1,1,5078.717949

1,1,2130.719697  
1,1,3597.604651  
1,1,1596.882979  
1,1,3271.804878  
1,1,2654.853723  
1,1,1946.981250  
1,1,2187.301948  
1,1,1784.192073  
1,1,2688.822917  
1,1,2640.173077  
1,1,18911.094697  
1,1,4062.970588  
1,1,2204.285714  
1,1,1919.460526  
1,1,2618.314286  
1,1,1762.910714  
1,1,3654.266055  
1,1,23131.657895  
1,1,2323.976562  
1,1,3443.946429  
1,1,3302.610294  
1,1,19008.500000  
1,1,2319.788235  
1,1,2748.238636  
1,1,6158.171053  
1,1,2917.250000  
1,1,32700.184659  
1,1,4217.182857  
1,1,10321.323171  
1,1,3108.670732  
1,1,5295.781915  
1,1,2355.801136  
1,1,4905.975000  
1,1,11865.108108  
1,1,1595.664634  
1,1,8243.950000  
1,1,7681.965625  
1,1,9586.854592  
1,1,1765.670139  
1,1,2531.750000  
1,1,2476.923780  
1,1,56311.663043  
1,1,3366.720690  
1,1,2360.484043  
1,1,4263.006098  
1,1,3723.650000  
1,1,2797.500000  
1,1,10118.087838  
1,1,2358.100000  
1,1,2511.771277  
1,1,4061.850962  
1,1,2332.088415  
1,1,3514.312500  
1,1,1598.235465  
1,1,1849.673077  
1,1,2873.204545  
1,1,1966.242647  
1,1,30619.471154  
1,1,1530.634615  
1,1,1780.780788  
1,1,4042.604651  
1,1,15146.762500  
1,1,3155.768293  
1,1,3334.892857  
1,1,13379.861111  
1,1,36668.300000

1,1,3578.200000  
1,1,2527.650000  
1,1,16763.850543  
1,1,1629.788889  
1,1,11774.578947  
1,1,6031.277778  
1,1,1648.545455  
1,1,4425.457447  
1,1,2182.415000  
1,1,1742.185714  
1,1,2021.863636  
1,1,1871.465426  
1,1,2720.854730  
1,1,7503.320000  
1,1,4845.143617  
1,1,4369.415385  
1,1,2686.414634  
1,1,5449.892857  
1,1,3710.500000  
1,1,11832.159483  
1,1,1598.913043  
1,1,6040.094595  
1,1,2176.906250  
1,1,1975.217391  
1,1,1758.888889  
1,1,6440.756944  
1,1,2114.643382  
1,1,2817.012019  
1,1,5163.883436  
1,1,39961.236842  
1,1,6012.170732  
1,1,4728.000000  
1,1,12270.710366  
1,1,2004.678977  
1,1,5005.686111  
1,1,2026.996377  
1,1,2440.932692  
1,1,2583.915761  
1,1,5963.602273  
1,1,27233.318548  
1,1,2121.558824  
1,1,38904.818182  
1,1,3048.687500  
1,1,79388.460526  
1,1,5978.588816  
1,1,2553.000000  
1,1,4898.262500  
1,1,5718.200000  
1,1,1709.316176  
1,1,4885.425532  
1,1,8009.000000  
1,1,2234.965278  
1,1,1877.930921  
1,1,1672.693878  
1,1,33249.559028  
1,1,10112.181818  
1,1,11626.577778  
1,1,5930.840278  
1,1,2721.324468  
1,1,2537.266667  
1,1,2728.928571  
1,1,10198.135135  
1,1,2118.692308  
1,1,42081.660326  
1,1,2265.402778  
1,1,3167.397436

1,1,1576.490132  
1,1,9938.276786  
1,1,1829.864362  
1,1,2557.560976  
1,1,1523.779255  
1,1,2155.670833  
1,1,65799.385714  
1,1,4471.352941  
1,1,2008.827586  
1,1,2346.105263  
1,1,3521.000000  
1,1,2610.977273  
1,1,2112.511628  
1,1,1950.817857  
1,1,1713.784574  
1,1,8702.857143  
1,1,1631.898256  
1,1,2500.710366  
1,1,5287.121622  
1,1,6171.143617  
1,1,2302.958333  
1,1,3439.541667  
1,1,3541.548780  
1,1,5119.460227  
1,1,4712.923077  
1,1,4105.458333  
1,1,2457.578947  
1,1,1844.333333  
1,1,2041.610795  
1,1,100597.909091  
1,1,1892.855556  
1,1,43261.325000  
1,1,3628.604396  
1,1,2792.000000  
1,1,1540.979730  
1,1,3319.782051  
1,1,2531.393750  
1,1,4681.224490  
1,1,5808.593137  
1,1,2170.247024  
1,1,3720.395349  
1,1,2825.419355  
1,1,6961.343750  
1,1,10392.219298  
1,1,1650.743902  
1,1,5893.875000  
1,1,13074.125000  
1,1,3074.706522  
1,1,114372.043478  
1,1,1517.937500  
1,1,5827.060606  
1,1,1552.957447  
1,1,7592.578125  
1,1,7052.541667  
1,1,1545.081081  
1,1,1736.133333  
1,1,40707.821429  
1,1,3185.398810  
1,1,1557.771739  
1,1,49513.333333  
1,1,1781.107143  
1,1,9579.442308  
1,1,6327.688623  
1,1,3390.107759  
1,1,4413.851562  
1,1,2012.090909

1,1,14055.893617  
1,1,6603.012821  
1,1,20087.950758  
1,1,1972.239583  
1,1,2366.244898  
1,1,2342.439024  
1,1,14254.600694  
1,1,2159.714286  
1,1,6022.237500  
1,1,1654.078125  
1,1,2990.720588  
1,1,90112.697917  
1,1,6685.383234  
1,1,1782.371622  
1,1,2984.746951  
1,1,99060.532895  
1,1,10614.544811  
1,1,1598.050000  
1,1,2874.035714  
1,1,2058.616667  
1,1,6909.685811  
1,1,4395.764706  
1,1,8438.308824  
1,1,2142.110465  
1,1,4043.101351  
1,1,2086.514423  
1,1,1925.194444  
1,1,2951.275862  
1,1,3822.500000  
1,1,2878.122093  
1,1,4637.500000  
1,1,2002.965278  
1,1,4073.886364  
1,1,3478.912162  
1,1,3768.359375  
1,1,2595.189189  
1,1,2012.836957  
1,1,2842.444444  
1,1,4167.427136  
1,1,1668.684375  
1,1,3234.071809  
1,1,1804.103448  
1,1,6259.125000  
1,1,5432.652174  
1,1,5131.309659  
1,1,1998.412500  
1,1,3252.714286  
1,1,8663.000000  
1,1,1824.378049  
1,1,2091.768382  
1,1,3098.208333  
1,1,6051.450000  
1,1,1645.613095  
1,1,2062.207447  
1,1,4490.071770  
1,1,1560.393939  
1,1,1925.441860  
1,1,2597.750000  
1,1,66752.666667  
1,1,13401.982143  
1,1,2924.890625  
1,1,2873.182390  
1,1,2682.157895  
1,1,1583.534722  
1,1,8543.765957  
1,1,4785.235294

1,1,22541.014205  
1,1,5582.113636  
1,1,65176.019231  
1,1,2043.664634  
1,1,1619.673469  
1,1,1656.022857  
1,1,4294.670213  
1,1,2017.083333  
1,1,5968.288462  
1,1,3715.901316  
1,1,100087.144231  
1,1,18514.772727  
1,1,3146.031250  
1,1,3099.642857  
1,1,3811.705882  
1,1,119801.729167  
1,1,6072.054688  
1,1,2976.266892  
1,1,3997.138889  
1,1,12272.043367  
1,1,6084.744186  
1,1,1501.142857  
1,1,3076.755556  
1,1,6238.531250  
1,1,2658.936111  
1,1,3493.329545  
1,1,1552.380952  
1,1,20120.909091  
1,1,1853.657143  
1,1,2494.263158  
1,1,6130.668605  
1,1,10252.913043  
1,1,11070.298387  
1,1,7265.047619  
1,1,92875.335106  
1,1,9247.926829  
1,1,13049.975610  
1,1,37033.875000  
1,1,2151.883721  
1,1,11614.226415  
1,1,5288.103448  
1,1,2992.250000  
1,1,4065.083333  
1,1,41872.937500  
1,1,4989.057065  
1,1,2159.969388  
1,1,5581.921875  
1,1,45600.566406  
1,1,8659.151786  
1,1,10030.223214  
1,1,3696.592949  
1,1,2057.977273  
1,1,4085.304054  
1,1,4006.607143  
1,1,2527.896875  
1,1,2960.430233  
1,1,26572.875000  
1,1,2374.545732  
1,1,1793.596154  
1,1,4381.704545  
1,1,3466.729167  
1,1,5871.125000  
1,1,1714.888889  
1,1,2976.851744  
1,1,1603.460227  
1,1,1825.817568

1,1,4156.187500  
1,1,3962.451923  
1,1,4014.500000  
1,1,2796.280303  
1,1,2391.344595  
1,1,1761.012500  
1,1,2088.657143  
1,1,2069.778846  
1,1,1545.171429  
1,1,2725.316667  
1,1,2651.000000  
1,1,1838.058824  
1,1,22257.248428  
1,1,54703.946429  
1,1,1553.113095  
1,1,10873.443452  
1,1,3717.271429  
1,1,1714.923295  
1,1,4095.108108  
1,1,1682.185811  
1,1,1866.029070  
1,1,6011.515152  
1,1,7338.045455  
1,1,1885.091667  
1,1,87514.723958  
1,1,5436.247159  
1,1,9062.100694  
1,1,2977.812500  
1,1,1570.361486  
1,1,19344.591837  
1,1,10580.175000  
1,1,18305.243243  
1,1,5241.076923  
1,1,1674.851190  
1,1,11350.462500  
1,1,3965.423295  
1,1,26247.900568  
1,1,2351.238636  
1,1,2023.968750  
1,1,16062.469697  
1,1,10614.395833  
1,1,3464.091463  
1,1,1510.568182  
1,1,2688.925000  
1,1,3825.628289  
1,1,5997.138889  
1,1,2578.888889  
1,1,2337.781250  
1,1,2654.946429  
1,1,2044.170455  
1,1,65429.974359  
1,1,4913.956522  
1,1,2412.045732  
1,1,2564.062500  
1,1,6997.321429  
1,1,2779.341667  
1,1,3258.684524  
1,1,2667.375000  
1,1,4677.750000  
1,1,1800.865385  
1,1,1834.822368  
1,1,1672.088757  
1,1,3600.021277  
1,1,5108.825581  
1,1,3660.490964  
1,1,2031.608696

1,1,11450.250000  
1,1,135978.088957  
1,1,5240.911111  
1,1,12905.550000  
1,1,4207.440341  
1,1,3608.986486  
1,1,1937.148936  
1,1,3703.384615  
1,1,3071.267857  
1,1,3761.125000  
1,1,18633.844595  
1,1,2366.180556  
1,1,93156.944444  
1,1,11265.378289  
1,1,3551.867188  
1,1,1668.611111  
1,1,2821.005319  
1,1,4666.093750  
1,1,1829.250000  
1,1,122064.587209  
1,1,2566.169118  
1,1,5524.361364  
1,1,19329.236842  
1,1,3301.048077  
1,1,1935.500000  
1,1,9182.812500  
1,1,9823.921512  
1,1,2587.272727  
1,1,4070.590000  
1,1,1854.750000  
1,1,7533.397059  
1,1,12583.324324  
1,1,1660.102941  
1,1,2563.923913  
1,1,11478.181818  
1,1,7005.160156  
1,1,60848.144231  
1,1,2275.575581  
1,1,2732.098039  
1,1,9221.711538  
1,1,4824.057692  
1,1,1868.010870  
1,1,3432.913462  
1,1,4324.869565  
1,1,2592.695122  
1,1,3696.234375  
1,1,2139.025641  
1,1,5878.125000  
1,1,4145.641304  
1,1,2571.136364  
1,1,7253.729167  
1,1,2219.022727  
1,1,6841.201117  
1,1,5905.838235  
1,1,1569.500000  
1,1,1694.250000  
1,1,36981.150641  
1,1,3103.333333  
1,1,5087.093750  
1,1,6885.806818  
1,1,4933.406250  
1,1,4114.125000  
1,1,1730.121324  
1,1,4736.625000  
1,1,6372.450000  
1,1,2148.416667

1,1,1580.785326  
1,1,2182.201220  
1,1,1720.689516  
1,1,4273.757143  
1,1,2043.594286  
1,1,1600.692073  
1,1,1833.466667  
1,1,1982.051282  
1,1,3076.652778  
1,1,1941.605114  
1,1,2632.036585  
1,1,1854.413043  
1,1,4384.791667  
1,1,1665.280488  
1,1,4648.659091  
1,1,2381.038265  
1,1,2553.382979  
1,1,3716.218750  
1,1,6656.861111  
1,1,4224.130435  
1,1,17076.316406  
1,1,7180.695312  
1,1,6199.558824  
1,1,3707.750000  
1,1,3551.058673  
1,1,85457.538462  
1,1,1521.108553  
1,1,2220.125000  
1,1,3894.666667  
1,1,3111.887195  
1,1,6461.669811  
1,1,8020.091146  
1,1,11088.434211  
1,1,3661.342857  
1,1,2319.615385  
1,1,9012.988636  
1,1,1603.851190  
1,1,5712.538462  
1,1,4941.000000  
1,1,12947.980000  
1,1,2615.473684  
1,1,63807.945946  
1,1,1677.011364  
1,1,2162.048649  
1,1,3629.763889  
1,1,3931.212500  
1,1,9182.295213  
1,1,3063.079787  
1,1,2727.936047  
1,1,5301.813830  
1,1,4413.722222  
1,1,5846.705357  
1,1,7320.625000  
1,1,5663.657143  
1,1,4076.758621  
1,1,1780.056818  
1,1,3441.635135  
1,1,7174.365625  
1,1,1956.896277  
1,1,7871.445122  
1,1,6214.933824  
1,1,1814.416667  
1,1,6385.031915  
1,1,2260.064103  
1,1,3602.717262  
1,1,6116.659420

1,1,4976.750000  
1,1,14417.268293  
1,1,3338.411184  
1,1,3297.192308  
1,1,4352.333333  
1,1,1823.000000  
1,1,2864.889706  
1,1,1557.987179  
1,1,1674.842949  
1,1,1904.023256  
1,1,9709.913043  
1,1,4947.378378  
1,1,23505.192308  
1,1,4305.266667  
1,1,5904.966216  
1,1,4210.329545  
1,1,4497.615385  
1,1,68260.268293  
1,1,1682.727273  
1,1,1964.000000  
1,1,2077.826220  
1,1,12664.000000  
1,1,3333.011111  
1,1,1926.695652  
1,1,3759.586538  
1,1,7412.688889  
1,1,5069.718750  
1,1,3311.314103  
1,1,8087.302083  
1,1,7211.500000  
1,1,7581.840426  
1,1,2230.807432  
1,1,2985.000000  
1,1,2182.424242  
1,1,9325.000000  
1,1,1616.361111  
1,1,6222.173295  
1,1,3839.625000  
1,1,3389.609043  
1,1,15606.404255  
1,1,1611.487805  
1,1,1519.647059  
1,1,2985.239583  
1,1,5479.267857  
1,1,4679.714286  
1,1,2861.628205  
1,1,2119.086957  
1,1,49330.304688  
1,1,3186.285714  
1,1,16319.028571  
1,1,8735.062500  
1,1,6769.100490  
1,1,2721.206522  
1,1,2994.736842  
1,1,2046.744186  
1,1,2440.352273  
1,1,7046.307692  
1,1,13537.864865  
1,1,24866.500000  
1,1,1673.187500  
1,1,4285.942935  
1,1,64525.063953  
1,1,1946.847222  
1,1,5067.385135  
1,1,2059.770833  
1,1,44576.135135

1,1,8215.937500  
1,1,2694.837209  
1,1,9931.461538  
1,1,3725.508152  
1,1,8884.722222  
1,1,60978.022059  
1,1,4670.315217  
1,1,1653.026316  
1,1,4283.000000  
1,1,9780.625000  
1,1,11366.545455  
1,1,7538.983333  
1,1,1701.901163  
1,1,18131.086957  
1,1,10277.170732  
1,1,3375.217105  
1,1,3411.920139  
1,1,2700.505102  
1,1,3683.229167  
1,1,3108.445946  
1,1,6748.755556  
1,1,2684.132812  
1,1,3578.375000  
1,1,3743.720930  
1,1,5709.108108  
1,1,4933.825581  
1,1,4665.590909  
1,1,1770.225694  
1,1,2580.724359  
1,1,6645.557692  
1,1,5313.846154  
1,1,4618.181818  
1,1,1730.581081  
1,1,4115.000000  
1,1,1809.175000  
1,1,5693.960526  
1,1,3099.182927  
1,1,7831.207447  
1,1,1958.222222  
1,1,5863.125000  
1,1,2129.229167  
1,1,21364.096875  
1,1,7476.270833  
1,1,2874.500000  
1,1,1631.195122  
1,1,18604.736111  
1,1,2292.365854  
1,1,5577.984848  
1,1,8511.753247  
1,1,10695.235000  
1,1,3433.162162  
1,1,7360.013889  
1,1,36314.164634  
1,1,3358.187500  
1,1,40983.926471  
1,1,4346.390625  
1,1,1841.904255  
1,1,3745.750000  
1,1,2342.179688  
1,1,1522.375000  
1,1,2353.906977  
1,1,6187.604730  
1,1,3487.541985  
1,1,2002.785714  
1,1,61093.475610  
1,1,2560.703125

1,1,8586.463235  
1,1,1599.430556  
1,1,49929.008475  
1,1,83086.000000  
1,1,1912.371622  
1,1,1719.943548  
1,1,9887.287879  
1,1,1748.260638  
1,1,4737.196721  
1,1,7929.503906  
1,1,2966.785714  
1,1,1596.163462  
1,1,40471.642857  
1,1,6680.189655  
1,1,145734.262500  
1,1,2166.025568  
1,1,2791.098039  
1,1,1656.824324  
1,1,11438.661765  
1,1,4601.743590  
1,1,9253.328125  
1,1,3995.896552  
1,1,3220.742857  
1,1,1726.368421  
1,1,2053.988636  
1,1,2479.185811  
1,1,5204.605263  
1,1,1797.556452  
1,1,10133.133929  
1,1,7668.093750  
1,1,3363.487500  
1,1,3473.116667  
1,1,8783.101744  
1,1,3468.909483  
1,1,3391.965116  
1,1,7776.318182  
1,1,4514.816176  
1,1,2497.658537  
1,1,2998.142857  
1,1,2043.384615  
1,1,1599.965116  
1,1,7087.659314  
1,1,5484.852941  
1,1,5617.500000  
1,1,1741.539634  
1,1,5259.775000  
1,1,51700.785714  
1,1,6236.892857  
1,1,1647.165761  
1,1,6536.538462  
1,1,3146.527174  
1,1,9256.596939  
1,1,2577.803922  
1,1,3247.943750  
1,1,13474.493056  
1,1,7204.509868  
1,1,3464.480769  
1,1,4512.151042  
1,1,1876.116848  
1,1,1830.622222  
1,1,6298.375000  
1,1,20558.333333  
1,1,2150.275000  
1,1,1588.134375  
1,1,27025.122093  
1,1,46200.140625

1,1,1803.210227  
1,1,7407.388889  
1,1,2416.937500  
1,1,2556.996951  
1,1,2702.164773  
1,1,3373.534884  
1,1,7743.197500  
1,1,5443.000000  
1,1,6011.059091  
1,1,2324.527174  
1,1,7569.200000  
1,1,2550.234375  
1,1,4566.579787  
1,1,7336.025000  
1,1,2607.157143  
1,1,22575.307927  
1,1,3008.079545  
1,1,1634.403571  
1,1,2304.900000  
1,1,2708.784091  
1,1,2007.281250  
1,1,5886.877551  
1,1,2954.631944  
1,1,4454.142857  
1,1,2799.971429  
1,1,3297.576923  
1,1,7453.029412  
1,1,5956.465839  
1,1,2211.351562  
1,1,2946.296053  
1,1,2307.390244  
1,1,19442.407143  
1,1,4308.130435  
1,1,15078.727273  
1,1,28761.378378  
1,1,5477.785714  
1,1,59290.758333  
1,1,8947.173913  
1,1,53533.654412  
1,1,3852.092105  
1,1,3543.560976  
1,1,2057.805556  
1,1,10364.450000  
1,1,2830.875000  
1,1,3175.048077  
1,1,7132.993243  
1,1,3761.253676  
1,1,10015.887417  
1,1,4927.769231  
1,1,1522.000000  
1,1,5686.879310  
1,1,1770.173913  
1,1,4446.085106  
1,1,2480.500000  
1,1,3775.142857  
1,1,2977.282051  
1,1,2143.290441  
1,1,1701.255814  
1,1,2411.731250  
1,1,10262.168478  
1,1,2567.260000  
1,1,3897.635638  
1,1,2773.952500  
1,1,2346.245399  
1,1,1579.739496  
1,1,5842.739362

1,1,1812.097561  
1,1,1511.781250  
1,1,3154.525424  
1,1,1508.472973  
1,1,2665.891447  
1,1,2622.337989  
1,1,3249.552632  
1,1,2215.354286  
1,1,7338.265625  
1,1,3353.320312  
1,1,2103.902778  
1,1,1916.382979  
1,1,9109.632075  
1,1,27813.411585  
1,1,5476.446927  
1,1,11407.421875  
1,1,7451.085714  
1,1,1955.769231  
1,1,7087.125000  
1,1,4408.898438  
1,1,1835.673469  
1,1,36501.257812  
1,1,1705.053191  
1,1,13751.500000  
1,1,1656.562500  
1,1,3429.662500  
1,1,3663.040000  
1,1,4177.655405  
1,1,1925.794118  
1,1,6806.412791  
1,1,7375.687500  
1,1,2893.199219  
1,1,2594.543478  
1,1,2546.437500  
1,1,3820.578947  
1,1,2140.801136  
1,1,2136.491071  
1,1,2600.413265  
1,1,2522.552632  
1,1,1865.894022  
1,1,5226.881579  
1,1,1512.795322  
1,1,5959.146853  
1,1,1742.593750  
1,1,3924.343750  
1,1,4044.524038  
1,1,11508.135135  
1,1,1787.671053  
1,1,22212.934211  
1,1,30765.334459  
1,1,2291.222222  
1,1,2004.350000  
1,1,11381.715686  
1,1,2383.389535  
1,1,4646.476190  
1,1,2793.432692  
1,1,4343.307263  
1,1,2979.667476  
1,1,5367.769231  
1,1,5603.601190  
1,1,2311.390244  
1,1,2510.738095  
1,1,3247.310811  
1,1,2573.650641  
1,1,6736.078947  
1,1,3888.459239

1,1,1885.096154  
1,1,1957.799419  
1,1,4446.613636  
1,1,2572.173077  
1,1,4424.576389  
1,1,29884.826087  
1,1,2381.450581  
1,1,9752.066406  
1,1,2672.033333  
1,1,1566.040881  
1,1,3801.869565  
1,1,151383.578125  
1,1,7017.381579  
1,1,1762.111650  
1,1,2265.250000  
1,1,3394.425000  
1,1,9092.369318  
1,1,2070.227273  
1,1,12155.400000  
1,1,81675.360248  
1,1,1941.900000  
1,1,18658.807432  
1,1,1882.110294  
1,1,2310.521739  
1,1,1872.951220  
1,1,1553.974194  
1,1,3353.882353  
1,1,3621.220588  
1,1,4594.500000  
1,1,2903.906250  
1,1,7795.756757  
1,1,14545.871951  
1,1,2094.635135  
1,1,2575.031250  
1,1,3772.375000  
1,1,19988.280488  
1,1,1634.921875  
1,1,1872.086538  
1,1,1755.014205  
1,1,4733.025641  
1,1,6277.278409  
1,1,7821.812500  
1,1,1678.652439  
1,1,5848.147727  
1,1,2450.187500  
1,1,2511.054054  
1,1,1501.781250  
1,1,2020.375000  
1,1,41335.359375  
1,1,1596.949405  
1,1,4146.639535  
1,1,5308.011364  
1,1,2047.111111  
1,1,20264.511364  
1,1,2739.000000  
1,1,6288.969828  
1,1,8528.157609  
1,1,1675.479730  
1,1,2080.583333  
1,1,7865.250000  
1,1,8938.156977  
1,1,1569.269886  
1,1,4422.218750  
1,1,3777.506098  
1,1,3710.159722  
1,1,2491.914474

1,1,1813.128342  
1,1,3201.764706  
1,1,6360.819444  
1,1,2918.395349  
1,1,1522.152174  
1,1,6253.762712  
1,1,20707.888889  
1,1,1884.446429  
1,1,1591.857143  
1,1,1536.906667  
1,1,11270.133333  
1,1,1926.250000  
1,1,2890.571429  
1,1,3844.857143  
1,1,4129.479730  
1,1,4425.920000  
1,1,5534.500000  
1,1,6115.529412  
1,1,2453.707317  
1,1,13541.327206  
1,1,6975.455882  
1,1,58774.400000  
1,1,1728.304487  
1,1,8117.641026  
1,1,4011.068182  
1,1,7615.500000  
1,1,13940.736486  
1,1,4159.038889  
1,1,3613.402778  
1,1,1980.000000  
1,1,11781.000000  
1,1,1988.210227  
1,1,16942.176471  
1,1,41600.513158  
1,1,2147.866667  
1,1,4907.207386  
1,1,3744.453488  
1,1,6409.323864  
1,1,31701.625000  
1,1,2119.917553  
1,1,7270.544304  
1,1,1653.040698  
1,1,1676.710526  
1,1,7697.125000  
1,1,2783.794643  
1,1,3603.850000  
1,1,6686.651163  
1,1,1931.567568  
1,1,7982.333333  
1,1,2408.380814  
1,1,1597.109677  
1,1,2983.573298  
1,1,3264.836735  
1,1,3225.342105  
1,1,1906.987500  
1,1,3279.857955  
1,1,2127.026316  
1,1,3984.671053  
1,1,2598.355769  
1,1,7547.734375  
1,1,6476.831633  
1,1,2548.118421  
1,1,4382.434783  
1,1,3214.954787  
1,1,1908.017857  
1,1,2352.393548

1,1,12466.746324  
1,1,1595.290698  
1,1,3325.265306  
1,1,1581.544444  
1,1,3286.257143  
1,1,1988.818182  
1,1,4201.071429  
1,1,15209.381944  
1,1,1991.608333  
1,1,6164.664773  
1,1,83250.577206  
1,1,3717.335106  
1,1,5270.786932  
1,1,7273.305147  
1,1,2906.544872  
1,1,1897.173913  
1,1,12559.012755  
1,1,62076.653846  
1,1,3885.342105  
1,1,2147.528409  
1,1,5611.390625  
1,1,1939.202778  
1,1,2960.230114  
1,1,6580.368263  
1,1,10432.952381  
1,1,4968.407407  
1,1,2161.234375  
1,1,4481.621094  
1,1,1687.025000  
1,1,6284.705882  
1,1,1563.125000  
1,1,3226.568182  
1,1,1540.792683  
1,1,3333.063953  
1,1,10593.687500  
1,1,3569.625000  
1,1,2764.067073  
1,1,2936.676630  
1,1,2481.692857  
1,1,3519.103448  
1,1,52286.208333  
1,1,1783.809524  
1,1,8667.444149  
1,1,2443.250000  
1,1,4285.229167  
1,1,4392.581395  
1,1,5693.000000  
1,1,1859.122222  
1,1,5795.950000  
1,1,41424.058140  
1,1,2821.073529  
1,1,3139.139535  
1,1,4360.276596  
1,1,3948.138889  
1,1,1909.919271  
1,1,6935.375000  
1,1,2286.318182  
1,1,38088.190476  
1,1,13371.687500  
1,1,2597.365000  
1,1,3336.904255  
1,1,2075.390244  
1,1,2941.086538  
1,1,2134.000000  
1,1,5456.583333  
1,1,6352.904523

1,1,2349.244898  
1,1,2323.304878  
1,1,2830.988971  
1,1,3741.091837  
1,1,3926.444079  
1,1,2236.487805  
1,1,3691.317308  
1,1,4219.142500  
1,1,13398.341463  
1,1,3229.785714  
1,1,3662.241477  
1,1,7468.771739  
1,1,4283.750000  
1,1,2374.934211  
1,1,12520.052326  
1,1,4103.400000  
1,1,4355.000000  
1,1,52556.053977  
1,1,3366.209302  
1,1,2309.010204  
1,1,9900.092105  
1,1,3722.598684  
1,1,3797.478261  
1,1,6618.147727  
1,1,1998.199405  
1,1,4926.977941  
1,1,2750.353125  
1,1,2034.097561  
1,1,2016.227273  
1,1,4531.554054  
1,1,1694.837500  
1,1,2085.272059  
1,1,3666.722222  
1,1,2839.956522  
1,1,3609.858696  
1,1,39759.650000  
1,1,6113.178977  
1,1,2438.336538  
1,1,2496.244444  
1,1,7944.581395  
1,1,2511.750000  
1,1,1815.775000  
1,1,2024.770833  
1,1,2524.066667  
1,1,4459.486842  
1,1,1744.631250  
1,1,4926.246711  
1,1,34582.368421  
1,1,2620.383333  
1,1,1892.600000  
1,1,4567.717949  
1,1,3158.597826  
1,1,19413.605263  
1,1,7036.714286  
1,1,6922.992188  
1,1,3816.734375  
1,1,3545.888298  
1,1,8933.860294  
1,1,1903.096591  
1,1,3368.852941  
1,1,1979.631579  
1,1,1512.482558  
1,1,8331.908537  
1,1,1580.144231  
1,1,1637.404762  
1,1,2590.627907

1,1,2840.908537  
1,1,6850.437500  
1,1,2867.854167  
1,1,1843.278125  
1,1,1941.486607  
1,1,8577.663889  
1,1,9657.068627  
1,1,1858.000000  
1,1,6295.276596  
1,1,2775.875000  
1,1,10877.510638  
1,1,1963.340278  
1,1,1644.069767  
1,1,1572.923913  
1,1,1534.750000  
1,1,1568.878571  
1,1,2317.650000  
1,1,2938.764535  
1,1,5433.114583  
1,1,6097.378571  
1,1,10492.359756  
1,1,2589.468750  
1,1,36058.025281  
1,1,2353.383929  
1,1,2827.571429  
1,1,2249.255000  
1,1,1887.756250  
1,1,1634.082237  
1,1,1894.466146  
1,1,2280.054688  
1,1,4578.352564  
1,1,2729.135204  
1,1,11691.419271  
1,1,1636.733108  
1,1,8695.916667  
1,1,2182.281250  
1,1,3492.869565  
1,1,1786.951220  
1,1,1955.568182  
1,1,5254.117647  
1,1,3032.305851  
1,1,2776.067708  
1,1,1885.500000  
1,1,3904.687500  
1,1,2407.008721  
1,1,128963.328125  
1,1,2643.319767  
1,1,4415.610465  
1,1,1967.467949  
1,1,19392.203571  
1,1,2226.895349  
1,1,2159.253049  
1,1,9475.737762  
1,1,5774.567568  
1,1,2343.398649  
1,1,9132.918367  
1,1,8181.108696  
1,1,3483.888889  
1,1,9977.078947  
1,1,3381.479167  
1,1,2399.153646  
1,1,2542.851064  
1,1,7434.170000  
1,1,1564.986842  
1,1,3449.427500  
1,1,3498.218750

1,1,1700.483974  
1,1,1758.937500  
1,1,6438.195652  
1,1,90853.096591  
1,1,3367.642857  
1,1,11157.551020  
1,1,2509.983333  
1,1,4803.236842  
1,1,1521.277778  
1,1,9609.083333  
1,1,4631.951220  
1,1,7967.121951  
1,1,3745.923077  
1,1,37748.145833  
1,1,2467.500000  
1,1,3089.582237  
1,1,1702.791667  
1,1,25349.039474  
1,1,2683.057143  
1,1,3097.047872  
1,1,9273.955882  
1,1,2799.038462  
1,1,4767.885870  
1,1,3697.107759  
1,1,8873.750000  
1,1,1569.500000  
1,1,1917.185811  
1,1,3508.454787  
1,1,17556.191489  
1,1,5000.273585  
1,1,2220.466837  
1,1,3290.342391  
1,1,2993.351351  
1,1,3285.758065  
1,1,3943.871622  
1,1,5405.793478  
1,1,5913.333333  
1,1,2387.612069  
1,1,1706.757979  
1,1,2412.070652  
1,1,2206.681250  
1,1,2611.960526  
1,1,7321.849057  
1,1,2051.333333  
1,1,2086.601562  
1,1,3719.189655  
1,1,2372.363636  
1,1,6145.527174  
1,1,7847.811111  
1,1,2474.000000  
1,1,1898.364865  
1,1,1699.475000  
1,1,2374.619186  
1,1,1920.545455  
1,1,3002.228261  
1,1,2852.000000  
1,1,3762.166667  
1,1,2405.220109  
1,1,2313.069767  
1,1,3839.662162  
1,1,6812.941176  
1,1,1891.861111  
1,1,4966.291667  
1,1,1775.204678  
1,1,2281.608696  
1,1,2856.218750

1,1,3416.715909  
1,1,5530.332447  
1,1,5037.360294  
1,1,1966.911111  
1,1,1672.030405  
1,1,1562.738372  
1,1,3486.909091  
1,1,2762.113636  
1,1,21217.714286  
1,1,5488.032258  
1,1,2095.442073  
1,1,6739.449468  
1,1,2386.894231  
1,1,2597.894040  
1,1,14426.530488  
1,1,53911.315476  
1,1,3085.653846  
1,1,8719.062500  
1,1,3798.535714  
1,1,16158.597122  
1,1,4168.048295  
1,1,3342.701705  
1,1,2623.414286  
1,1,1506.943182  
1,1,1852.093023  
1,1,5175.894737  
1,1,4262.363636  
1,1,1869.328947  
1,1,5354.948171  
1,1,2446.195652  
1,1,41975.243750  
1,1,4157.558140  
1,1,6352.307692  
1,1,3637.250000  
1,1,8872.023256  
1,1,4945.393617  
1,1,7837.195652  
1,1,2245.105469  
1,1,6158.338983  
1,1,4969.756579  
1,1,4574.427632  
1,1,3060.116279  
1,1,2978.045455  
1,1,3759.964286  
1,1,5513.230769  
1,1,16461.645349  
1,1,1877.841216  
1,1,6661.890000  
1,1,31836.154412  
1,1,4432.695312  
1,1,7700.062500  
1,1,1523.539634  
1,1,2233.400000  
1,1,49290.857143  
1,1,10374.500000  
1,1,52955.055921  
1,1,4992.561170  
1,1,1669.958333  
1,1,7374.052632  
1,1,1769.904070  
1,1,8396.636364  
1,1,1739.861413  
1,1,68256.706897  
1,1,3722.268382  
1,1,2627.610119  
1,1,3117.613636

1,1,1665.758152  
1,1,1925.414634  
1,1,4203.553125  
1,1,1613.227564  
1,1,24848.886364  
1,1,1829.500000  
1,1,43892.611486  
1,1,1521.421053  
1,1,3015.013889  
1,1,11836.268293  
1,1,1876.594697  
1,1,3677.944079  
1,1,2224.251572  
1,1,1852.837209  
1,1,2355.046512  
1,1,1950.858553  
1,1,2169.411111  
1,1,16860.645161  
1,1,1914.615385  
1,1,3955.668919  
1,1,1642.969388  
1,1,4073.260870  
1,1,10572.281250  
1,1,13433.410714  
1,1,3750.023256  
1,1,2901.884615  
1,1,1649.942308  
1,1,9609.875000  
1,1,3569.893617  
1,1,1703.555556  
1,1,1546.512821  
1,1,3160.067568  
1,1,1983.455882  
1,1,9226.275735  
1,1,5773.382979  
1,1,2585.500000  
1,1,2593.112245  
1,1,1594.435976  
1,1,1780.485465  
1,1,4688.638587  
1,1,16520.482143  
1,1,4580.851190  
1,1,1679.580000  
1,1,7079.885417  
1,1,12925.480263  
1,1,2914.315789  
1,1,4667.421875  
1,1,6247.222222  
1,1,4161.121951  
1,1,5553.085714  
1,1,3895.011364  
1,1,2724.533333  
1,1,2066.125000  
1,1,2674.973684  
1,1,1581.500000  
1,1,1785.390957  
1,1,104803.520231  
1,1,4940.084459  
1,1,1558.120567  
1,1,2310.728659  
1,1,1849.097561  
1,1,2158.500000  
1,1,2869.109375  
1,1,1652.687500  
1,1,5645.533333  
1,1,2321.538462

1,1,4606.800000  
1,1,2064.888298  
1,1,3603.257353  
1,1,4418.500000  
1,1,2144.181818  
1,1,2534.297872  
1,1,2092.075000  
1,1,3092.226064  
1,1,2197.919463  
1,1,3819.489583  
1,1,7564.872549  
1,1,39053.229730  
1,1,7308.480000  
1,1,2329.144737  
1,1,2245.247283  
1,1,3220.437500  
1,1,1761.081522  
1,1,2325.842500  
1,1,1870.594595  
1,1,3111.892857  
1,1,2175.371795  
1,1,5943.451389  
1,1,15029.017361  
1,1,5337.568182  
1,1,3996.083333  
1,1,1892.319149  
1,1,3770.394737  
1,1,3196.948718  
1,1,6692.988636  
1,1,4064.215000  
1,1,4160.228261  
1,1,2812.009146  
1,1,2178.250000  
1,1,3724.354167  
1,1,4059.811170  
1,1,149268.258523  
1,1,6183.633333  
1,1,1574.106383  
1,1,3829.104730  
1,1,2435.900000  
1,1,2362.819149  
1,1,3734.712500  
1,1,13046.025568  
1,1,1887.818182  
1,1,4812.925000  
1,1,8744.739583  
1,1,1695.989130  
1,1,7410.720745  
1,1,2126.840000  
1,1,2388.871951  
1,1,4670.375000  
1,1,1965.833333  
1,1,2685.800000  
1,1,1882.053571  
1,1,1621.619444  
1,1,1677.028646  
1,1,2492.718750  
1,1,4508.416667  
1,1,11068.814103  
1,1,2835.909091  
1,1,5716.780347  
1,1,2813.834459  
1,1,3047.977273  
1,1,1587.933333  
1,1,1653.166667  
1,1,3138.254286

1,1,12648.542553  
1,1,1783.732143  
1,1,8488.100543  
1,1,4746.091463  
1,1,1560.937500  
1,1,5155.221591  
1,1,5406.488889  
1,1,5796.475000  
1,1,1978.793605  
1,1,15582.971154  
1,1,22112.521739  
1,1,22811.348214  
1,1,1872.500000  
1,1,5342.850962  
1,1,2887.198795  
1,1,1642.615132  
1,1,2707.786932  
1,1,2843.851562  
1,1,2424.802326  
1,1,49907.911932  
1,1,11926.015152  
1,1,2210.776786  
1,1,8186.431373  
1,1,1923.222222  
1,1,2443.125000  
1,1,3539.564516  
1,1,2029.452703  
1,1,2831.719136  
1,1,9147.580420  
1,1,4952.964286  
1,1,1648.200000  
1,1,1742.977041  
1,1,2335.809524  
1,1,1661.209302  
1,1,24002.250000  
1,1,4647.296875  
1,1,6674.197917  
1,1,4558.741379  
1,1,59418.000000  
1,1,12684.645833  
1,1,2011.904762  
1,1,5157.274306  
1,1,6658.241071  
1,1,7006.930556  
1,1,3449.101562  
1,1,2700.666667  
1,1,9994.315789  
1,1,2441.241071  
1,1,2277.541667  
1,1,6816.421053  
1,1,2034.366279  
1,1,2230.750000  
1,1,3109.684211  
1,1,2006.255814  
1,1,2628.145349  
1,1,57901.625000  
1,1,3746.966667  
1,1,2974.425532  
1,1,1522.615385  
1,1,1688.349359  
1,1,6202.966463  
1,1,2608.530120  
1,1,4687.595745  
1,1,5226.007212  
1,1,1681.410714  
1,1,3049.326923

1,1,1529.687500  
1,1,9063.456250  
1,1,1716.587500  
1,1,4332.477679  
1,1,4080.038462  
1,1,34999.020833  
1,1,2170.609756  
1,1,5730.613636  
1,1,128628.946429  
1,1,4561.166667  
1,1,2400.634615  
1,1,6916.487500  
1,1,2579.065625  
1,1,2214.729885  
1,1,3138.522727  
1,1,1889.161765  
1,1,4195.651596  
1,1,3496.777778  
1,1,11400.097561  
1,1,2511.750000  
1,1,1575.687500  
1,1,2610.500000  
1,1,60277.113333  
1,1,2337.354651  
1,1,4023.940789  
1,1,16640.312500  
1,1,3697.134615  
1,1,2078.232558  
1,1,5132.375000  
1,1,2002.355556  
1,1,4878.036765  
1,1,2637.035714  
1,1,1962.880682  
1,1,7509.500000  
1,1,11177.250000  
1,1,2321.820946  
1,1,3350.571429  
1,1,4481.700000  
1,1,1915.687500  
1,1,3536.049107  
1,1,1957.000000  
1,1,44678.230769  
1,1,4156.829545  
1,1,1805.718750  
1,1,1718.312500  
1,1,5693.810976  
1,1,8240.704545  
1,1,2856.500000  
1,1,2077.073864  
1,1,1794.836735  
1,1,2647.100000  
1,1,9353.892857  
1,1,4229.881579  
1,1,7377.285714  
1,1,11237.938776  
1,1,1732.750000  
1,1,2156.576087  
1,1,1532.983333  
1,1,2732.052083  
1,1,1570.875000  
1,1,8946.777542  
1,1,29941.379032  
1,1,3005.979167  
1,1,3651.250000  
1,1,1735.942073  
1,1,8157.144737

1,1,3136.160714  
1,1,1905.900000  
1,1,4078.744186  
1,1,6234.425781  
1,1,3610.477273  
1,1,1527.384615  
1,1,2115.406250  
1,1,2448.668605  
1,1,10557.660526  
1,1,2922.772727  
1,1,1877.554878  
1,1,2664.321229  
1,1,3104.946809  
1,1,2526.518293  
1,1,4120.428571  
1,1,6523.225000  
1,1,2740.178571  
1,1,4683.834459  
1,1,12868.720930  
1,1,6831.259259  
1,1,1741.683673  
1,1,2598.625000  
1,1,9798.219512  
1,1,1977.390625  
1,1,3208.318182  
1,1,3267.203125  
1,1,1954.175676  
1,1,32128.397436  
1,1,3767.650000  
1,1,3922.929348  
1,1,4802.314189  
1,1,4730.265625  
1,1,17879.538690  
1,1,2146.535714  
1,1,72037.621622  
1,1,1589.312500  
1,1,43103.182065  
1,1,4951.333333  
1,1,2248.243243  
1,1,2939.319149  
1,1,2159.095238  
1,1,3399.534884  
1,1,2101.378472  
1,1,2197.918367  
1,1,2173.937500  
1,1,9853.429054  
1,1,2190.764706  
1,1,4309.141447  
1,1,8728.527439  
1,1,2151.604730  
1,1,6332.750000  
1,1,4162.081395  
1,1,5969.965517  
1,1,2358.055233  
1,1,3150.425595  
1,1,1585.391447  
1,1,1892.045455  
1,1,2075.692308  
1,1,4478.633880  
1,1,4189.922500  
1,1,3709.740854  
1,1,1875.833333  
1,1,3661.824405  
1,1,127442.729167  
1,1,2768.792453  
1,1,1896.850000

1,1,1812.478261  
1,1,5409.327128  
1,1,4710.941860  
1,1,1959.834532  
1,1,4084.096774  
1,1,92502.796196  
1,1,2405.891892  
1,1,1529.326923  
1,1,2288.625000  
1,1,1641.203125  
1,1,26942.759615  
1,1,2607.346154  
1,1,6683.382653  
1,1,1515.589286  
1,1,3131.011364  
1,1,4651.625000  
1,1,2959.642857  
1,1,1797.521739  
1,1,7942.055556  
1,1,9645.863636  
1,1,6511.938776  
1,1,79191.824324  
1,1,3670.194444  
1,1,5140.900000  
1,1,3064.603125  
1,1,8049.363636  
1,1,10739.067130  
1,1,3598.737903  
1,1,1742.650000  
1,1,3252.300000  
1,1,23400.987500  
1,1,2327.621622  
1,1,2284.090116  
1,1,4461.041667  
1,1,3556.350543  
1,1,3005.920455  
1,1,4177.367347  
1,1,1606.203488  
1,1,6072.841463  
1,1,56592.033333  
1,1,3316.333333  
1,1,105167.800000  
1,1,2350.431818  
1,1,2111.892857  
1,1,14928.380208  
1,1,3056.103571  
1,1,7251.437500  
1,1,16648.655612  
1,1,11671.051829  
1,1,2696.091837  
1,1,1724.936170  
1,1,6971.625000  
1,1,2939.114286  
1,1,2176.803571  
1,1,1705.233974  
1,1,3377.920455  
1,1,4388.086806  
1,1,3182.432432  
1,1,8048.466667  
1,1,3418.569444  
1,1,12245.000000  
1,1,2647.494565  
1,1,3339.571429  
1,1,14371.867925  
1,1,47008.729167  
1,1,1648.875000

1,1,2325.270833  
1,1,3609.647727  
1,1,10955.546053  
1,1,2313.000000  
1,1,5893.028302  
1,1,4825.147059  
1,1,8390.800000  
1,1,3275.767857  
1,1,7407.750000  
1,1,2671.903226  
1,1,6362.613636  
1,1,6883.893382  
1,1,6024.571429  
1,1,2056.209459  
1,1,8355.421053  
1,1,35031.826220  
1,1,2255.011364  
1,1,4790.227273  
1,1,1680.976190  
1,1,1530.723837  
1,1,3845.660377  
1,1,14053.390411  
1,1,5352.054348  
1,1,2239.315789  
1,1,1502.000000  
1,1,5042.583333  
1,1,1916.583333  
1,1,4970.733553  
1,1,4531.375000  
1,1,7396.856383  
1,1,5336.625000  
1,1,1730.630682  
1,1,13210.425000  
1,1,5745.200000  
1,1,2366.244444  
1,1,2077.230769  
1,1,1958.581395  
1,1,3292.560976  
1,1,9203.508621  
1,1,4819.382653  
1,1,4977.434783  
1,1,3705.525000  
1,1,7596.472973  
1,1,2520.366279  
1,1,6247.352941  
1,1,2090.959064  
1,1,2230.454545  
1,1,4428.094828  
1,1,24057.450000  
1,1,8005.505814  
1,1,3554.860000  
1,1,7625.200000  
1,1,27004.022727  
1,1,5898.603659  
1,1,2515.368750  
1,1,3104.627976  
1,1,1679.897959  
1,1,2503.346154  
1,1,2373.775862  
1,1,3047.803571  
1,1,14526.810606  
1,1,3231.963542  
1,1,20601.397059  
1,1,3028.519886  
1,1,5023.687500  
1,1,3099.428571

1,1,3345.895349  
1,1,3290.183673  
1,1,4796.720930  
1,1,7681.609043  
1,1,3047.343750  
1,1,1674.029762  
1,1,4828.062500  
1,1,4552.898649  
1,1,7341.191176  
1,1,2263.125000  
1,1,2233.567568  
1,1,8505.389423  
1,1,10283.293605  
1,1,4121.146552  
1,1,2011.555000  
1,1,3491.190217  
1,1,2091.936709  
1,1,6104.477941  
1,1,4061.083333  
1,1,2536.651163  
1,1,2223.878205  
1,1,4465.233333  
1,1,10706.906250  
1,1,1703.318878  
1,1,1955.151079  
1,1,22553.464744  
1,1,2829.298780  
1,1,1567.366279  
1,1,17257.775000  
1,1,1590.410256  
1,1,3227.500000  
1,1,1695.460000  
1,1,2544.166667  
1,1,2522.000000  
1,1,6599.446809  
1,1,3669.267045  
1,1,2030.345930  
1,1,7545.537879  
1,1,3750.551471  
1,1,3850.017857  
1,1,4550.000000  
1,1,49027.776163  
1,1,2809.351744  
1,1,8034.608333  
1,1,1903.423077  
1,1,2784.932692  
1,1,2297.727679  
1,1,5464.851744  
1,1,1813.514286  
1,1,1647.160714  
1,1,1921.261628  
1,1,3462.141304  
1,1,5702.027027  
1,1,4542.400000  
1,1,6020.618421  
1,1,12505.665761  
1,1,2451.307692  
1,1,1919.345395  
1,1,2082.844595  
1,1,1994.684211  
1,1,13335.309659  
1,1,2491.375000  
1,1,3673.448171  
1,1,6913.089744  
1,1,2356.507812  
1,1,12576.255814

1,1,2893.700000  
1,1,4722.691860  
1,1,3192.709677  
1,1,1582.571429  
1,1,3149.016304  
1,1,4192.734694  
1,1,4209.451389  
1,1,94485.292683  
1,1,2131.789474  
1,1,2379.000000  
1,1,3092.864865  
1,1,16588.187500  
1,1,2539.527174  
1,1,27389.416667  
1,1,5507.222973  
1,1,2870.759615  
1,1,2202.845395  
1,1,1936.580882  
1,1,2155.777778  
1,1,2651.958333  
1,1,3442.720588  
1,1,3666.767500  
1,1,3239.900000  
1,1,2501.500000  
1,1,4891.480114  
1,1,1747.444444  
1,1,5572.118421  
1,1,1799.882353  
1,1,34760.560241  
1,1,2134.097561  
1,1,5764.833333  
1,1,1924.701923  
1,1,36992.636628  
1,1,2176.866667  
1,1,7839.525000  
1,1,2824.517045  
1,1,1787.884615  
1,1,58768.893939  
1,1,3610.491071  
1,1,3168.096774  
1,1,49052.000000  
1,1,1550.175573  
1,1,2344.953488  
1,1,1896.388298  
1,1,17049.686170  
1,1,6929.188889  
1,1,1643.431250  
1,1,1540.084459  
1,1,5662.041667  
1,1,2179.238095  
1,1,3800.906250  
1,1,3412.527778  
1,1,3610.666667  
1,1,61515.301471  
1,1,6006.136364  
1,1,1855.901316  
1,1,2350.865385  
1,1,12958.757576  
1,1,5041.307292  
1,1,4187.816176  
1,1,1717.846626  
1,1,3451.500000  
1,1,1588.432624  
1,1,2081.614286  
1,1,15501.780488  
1,1,5199.116667

1,1,2275.647727  
1,1,3459.367347  
1,1,4625.336111  
1,1,1869.722222  
1,1,26255.036585  
1,1,9864.250000  
1,1,2223.828947  
1,1,7318.750000  
1,1,2789.008152  
1,1,1668.343137  
1,1,2229.189516  
1,1,25655.763889  
1,1,3236.954268  
1,1,2056.224265  
1,1,1606.625000  
1,1,4954.441176  
1,1,1714.788043  
1,1,3762.068182  
1,1,1795.108108  
1,1,1521.288690  
1,1,2192.583333  
1,1,28228.875000  
1,1,1886.563776  
1,1,3595.236486  
1,1,1805.750000  
1,1,2975.816860  
1,1,1509.206250  
1,1,3565.581395  
1,1,2349.458333  
1,1,2593.398649  
1,1,1741.333333  
1,1,8271.003289  
1,1,5014.438889  
1,1,4068.211538  
1,1,1776.333333  
1,1,1566.589286  
1,1,11756.025000  
1,1,1900.281250  
1,1,3241.755319  
1,1,4982.500000  
1,1,6573.312500  
1,1,1986.437500  
1,1,5155.057432  
1,1,3580.615385  
1,1,54036.625000  
1,1,1508.500000  
1,1,3608.753378  
1,1,60543.937500  
1,1,6158.891447  
1,1,3434.235294  
1,1,1582.975694  
1,1,4633.169118  
1,1,1624.840491  
1,1,7156.736842  
1,1,3663.137097  
1,1,4006.612500  
1,1,4592.300481  
1,1,21512.815476  
1,1,11607.954545  
1,1,4116.953488  
1,1,1657.836806  
1,1,17300.866667  
1,1,1762.375000  
1,1,38909.959677  
1,1,2719.640625  
1,1,2444.607143

1,1,9822.400000  
1,1,1544.388889  
1,1,8870.523810  
1,1,2523.853723  
1,1,21493.250000  
1,1,26515.169118  
1,1,3038.894737  
1,1,2951.551282  
1,1,3481.407143  
1,1,4159.290698  
1,1,2695.531250  
1,1,2664.465278  
1,1,1596.179487  
1,1,26886.040000  
1,1,2547.293919  
1,1,6819.272727  
1,1,2042.914286  
1,1,2005.013158  
1,1,2250.000000  
1,1,1613.861413  
1,1,3473.599490  
1,1,2544.566667  
1,1,1838.444767  
1,1,4246.443966  
1,1,2154.825581  
1,1,2840.100000  
1,1,2586.266892  
1,1,24324.300000  
1,1,12649.607143  
1,1,8045.359375  
1,1,1822.022727  
1,1,1628.067708  
1,1,139115.011364  
1,1,2817.666667  
1,1,3296.714286  
1,1,2537.598684  
1,1,2104.890244  
1,1,2424.500000  
1,1,2490.187500  
1,1,5412.797170  
1,1,2680.833333  
1,1,13455.575000  
1,1,2503.850000  
1,1,1658.597561  
1,1,14836.384615  
1,1,29782.950000  
1,1,2357.531250  
1,1,1620.536585  
1,1,4896.788194  
1,1,9322.023936  
1,1,2414.709559  
1,1,5046.323980  
1,1,4165.209302  
1,1,24869.336806  
1,1,2199.933333  
1,1,8238.913462  
1,1,2064.235795  
1,1,13932.516304  
1,1,1548.108108  
1,1,3776.543605  
1,1,3121.000000  
1,1,65637.000000  
1,1,1560.781250  
1,1,2062.292763  
1,1,8567.496622  
1,1,1767.095070

1,1,12939.048780  
1,1,5117.732639  
1,1,1764.801136  
1,1,12977.017857  
1,1,4449.299020  
1,1,17856.506757  
1,1,8625.562500  
1,1,1516.204545  
1,1,1581.641026  
1,1,6163.117647  
1,1,3890.060811  
1,1,2784.807692  
1,1,2248.754098  
1,1,2277.562500  
1,1,3688.391892  
1,1,1948.626404  
1,1,1821.106383  
1,1,4136.392157  
1,1,2573.867188  
1,1,12286.125000  
1,1,2499.692308  
1,1,86201.353261  
1,1,92147.365854  
1,1,2374.000000  
1,1,75668.741477  
1,1,3454.822917  
1,1,4633.572222  
1,1,3702.432432  
1,1,25722.775000  
1,1,7409.806452  
1,1,2304.642857  
1,1,2840.896341  
1,1,1841.982143  
1,1,3109.375000  
1,1,2580.875000  
1,1,1696.891892  
1,1,2625.939394  
1,1,2001.325658  
1,1,11617.122449  
1,1,3965.625000  
1,1,7960.625000  
1,1,2634.000000  
1,1,5460.293750  
1,1,42235.000000  
1,1,2236.451220  
1,1,1782.597222  
1,1,13003.059091  
1,1,4340.459119  
1,1,5333.021277  
1,1,12649.177778  
1,1,2254.833333  
1,1,5103.442708  
1,1,1727.955645  
1,1,3247.646875  
1,1,4371.210526  
1,1,48877.250000  
1,1,1900.388889  
1,1,4998.633094  
1,1,2534.500000  
1,1,1919.911111  
1,1,3021.473214  
1,1,4832.167553  
1,1,1865.135714  
1,1,2283.764706  
1,1,3730.677083  
1,1,3039.267857

1,1,2898.390625  
1,1,2617.900000  
1,1,2552.625000  
1,1,1965.059783  
1,1,3575.730392  
1,1,11650.167857  
1,1,2817.292683  
1,1,68739.750000  
1,1,1923.796875  
1,1,26067.000000  
1,1,6954.645833  
1,1,3766.445652  
1,1,1834.571429  
1,1,2487.812500  
1,1,64802.962500  
1,1,2508.872093  
1,1,4479.186170  
1,1,12001.288462  
1,1,2293.875000  
1,1,3845.062500  
1,1,6136.753125  
1,1,7200.959239  
1,1,1688.738636  
1,1,1934.394231  
1,1,3101.817500  
1,1,6111.201389  
1,1,6512.597222  
1,1,1642.397059  
1,1,2327.625000  
1,1,27295.341463  
1,1,3217.437500  
1,1,8981.413194  
1,1,1818.750000  
1,1,1670.416667  
1,1,1515.215426  
1,1,4736.564516  
1,1,17831.943182  
1,1,6398.966146  
1,1,3331.442308  
1,1,2471.744186  
1,1,5625.267442  
1,1,1651.954545  
1,1,7749.181818  
1,1,2894.682692  
1,1,1888.254717  
1,1,8954.615625  
1,1,4670.886029  
1,1,1508.512821  
1,1,2515.606707  
1,1,26337.122093  
1,1,18473.693750  
1,1,4720.946078  
1,1,6117.884615  
1,1,2130.500000  
1,1,2149.800000  
1,1,2252.125000  
1,1,7675.482143  
1,1,3895.844444  
1,1,2268.935811  
1,1,3786.000000  
1,1,2272.020833  
1,1,2102.617347  
1,1,3013.210000  
1,1,9565.631579  
1,1,2291.950000  
1,1,3199.484848

1,1,4649.642045  
1,1,7465.113636  
1,1,3609.572581  
1,1,4538.059524  
1,1,20922.601744  
1,1,2998.478261  
1,1,7026.978261  
1,1,7343.958333  
1,1,1657.500000  
1,1,3196.515152  
1,1,1820.743902  
1,1,3455.163194  
1,1,4354.558333  
1,1,13377.839286  
1,1,9265.964674  
1,1,2273.079082  
1,1,3307.886364  
1,1,1506.304054  
1,1,2035.993590  
1,1,2071.076923  
1,1,89411.443750  
1,1,28709.283784  
1,1,2087.670213  
1,1,5799.714286  
1,1,13745.808140  
1,1,13814.100000  
1,1,6730.125000  
1,1,25334.875000  
1,1,2210.850000  
1,1,2169.580645  
1,1,2616.653846  
1,1,1837.167500  
1,1,2113.920139  
1,1,2218.265060  
1,1,1862.343023  
1,1,2043.434659  
1,1,8241.090000  
1,1,18584.218750  
1,1,3837.762500  
1,1,1669.244186  
1,1,2046.798077  
1,1,1712.837838  
1,1,43312.330645  
1,1,1594.384868  
1,1,1920.212500  
1,1,156517.725000  
1,1,10620.602273  
1,1,1698.821809  
1,1,2829.039063  
1,1,2044.666667  
1,1,4053.285000  
1,1,9343.755319  
1,1,1822.445946  
1,1,2608.985465  
1,1,4890.312500  
1,1,2689.755102  
1,1,7060.642157  
1,1,87577.562500  
1,1,1794.029070  
1,1,2358.750000  
1,1,38157.130435  
1,1,8966.601093  
1,1,1574.891026  
1,1,2451.432065  
1,1,10155.411765  
1,1,3090.347973

1,1,3102.733333  
1,1,86583.933775  
1,1,102185.626667  
1,1,9187.069444  
1,1,3429.393750  
1,1,3164.452381  
1,1,1888.231707  
1,1,7688.260870  
1,1,1715.693182  
1,1,1767.000000  
1,1,5244.896907  
1,1,6199.714744  
1,1,3448.420455  
1,1,5912.511364  
1,1,1508.595238  
1,1,5933.587662  
1,1,1642.134615  
1,1,5101.519737  
1,1,2664.835106  
1,1,1715.000000  
1,1,12452.205128  
1,1,5500.571429  
1,1,3880.807065  
1,1,2128.595588  
1,1,10778.994681  
1,1,1917.085000  
1,1,9883.883929  
1,1,4664.439394  
1,1,7495.561047  
1,1,17516.634615  
1,1,3990.855263  
1,1,2309.951691  
1,1,4223.595745  
1,1,11437.083333  
1,1,4084.296512  
1,1,1674.910714  
1,1,1984.661765  
1,1,6188.692308  
1,1,3447.441860  
1,1,7458.427083  
1,1,6042.012755  
1,1,4268.778846  
1,1,2728.409091  
1,1,9539.269886  
1,1,3067.414474  
1,1,4022.562500  
1,1,2554.125000  
1,1,1735.863388  
1,1,102165.676282  
1,1,2289.326087  
1,1,5823.326531  
1,1,149750.550000  
1,1,20324.083333  
1,1,2275.097561  
1,1,12796.399194  
1,1,17563.081081  
1,1,11136.952381  
1,1,1949.035714  
1,1,3690.965116  
1,1,45880.628205  
1,1,5505.575581  
1,1,2220.908537  
1,1,4240.915625  
1,1,3103.071429  
1,1,1607.152174  
1,1,1967.968750

1,1,3005.294872  
1,1,11036.076087  
1,1,4406.734848  
1,1,2649.002551  
1,1,2794.625000  
1,1,3567.380952  
1,1,2708.724359  
1,1,2321.056452  
1,1,3759.074324  
1,1,1957.980978  
1,1,2681.800000  
1,1,3194.600610  
1,1,11349.630952  
1,1,2074.363636  
1,1,3193.090909  
1,1,2911.139706  
1,1,3618.797297  
1,1,5392.687500  
1,1,3352.392442  
1,1,11402.625000  
1,1,2065.402778  
1,1,6229.523810  
1,1,4469.944444  
1,1,3924.189655  
1,1,4912.400000  
1,1,3277.788462  
1,1,8397.446875  
1,1,4762.649194  
1,1,3956.429648  
1,1,6355.046196  
1,1,1907.165761  
1,1,90457.316176  
1,1,4181.263158  
1,1,3611.255682  
1,1,6136.282143  
1,1,2474.261905  
1,1,27119.381579  
1,1,1865.233553  
1,1,3256.056818  
1,1,44703.671053  
1,1,4704.653125  
1,1,2326.581395  
1,1,53271.811024  
1,1,3785.485000  
1,1,3101.934783  
1,1,1866.437500  
1,1,2056.708333  
1,1,3337.413043  
1,1,8550.407051  
1,1,36287.884375  
1,1,5389.305851  
1,1,41433.661290  
1,1,2902.250000  
1,1,3331.019886  
1,1,13528.615854  
1,1,2130.425000  
1,1,5417.328571  
1,1,3569.804348  
1,1,1911.781915  
1,1,9281.941589  
1,1,2797.125000  
1,1,2535.620000  
1,1,5921.959302  
1,1,8540.812500  
1,1,1600.134146  
1,1,1545.300000

1,1,4266.382514  
1,1,2562.834225  
1,1,1553.354167  
1,1,3032.601064  
1,1,4306.075000  
1,1,1903.149457  
1,1,1713.883721  
1,1,5529.720930  
1,1,6549.295455  
1,1,2824.166667  
1,1,2575.333333  
1,1,2208.341216  
1,1,84897.852273  
1,1,3796.295455  
1,1,9676.152439  
1,1,1959.140957  
1,1,2705.272959  
1,1,3547.159375  
1,1,7030.128289  
1,1,8012.486486  
1,1,2326.264205  
1,1,3058.166667  
1,1,3157.681818  
1,1,3036.418478  
1,1,5093.799342  
1,1,2051.039634  
1,1,7920.550000  
1,1,32128.406250  
1,1,6165.027027  
1,1,2261.777778  
1,1,1585.800000  
1,1,4688.272059  
1,1,2725.908163  
1,1,1499.924419  
1,1,4005.103774  
1,1,2103.125000  
1,1,3648.333333  
1,1,3395.250000  
1,1,1925.466216  
1,1,122179.893750  
1,1,7616.736842  
1,1,64096.789474  
1,1,6936.894737  
1,1,4788.673469  
1,1,7263.133523  
1,1,6168.255435  
1,1,3556.870968  
1,1,1931.730769  
1,1,4841.771341  
1,1,2713.068182  
1,1,1539.617500  
1,1,9580.564394  
1,1,2589.972826  
1,1,2569.070000  
1,1,2538.949468  
1,1,4418.716216  
1,1,2175.727273  
1,1,4152.950000  
1,1,118677.625000  
1,1,4338.178571  
1,1,8053.401961  
1,1,1828.279070  
1,1,5556.332386  
1,1,1580.258333  
1,1,5101.722222  
1,1,5083.771739

1,1,5883.555556  
1,1,2404.529412  
1,1,1935.279070  
1,1,8343.770833  
1,1,1908.513889  
1,1,2352.051282  
1,1,2327.130556  
1,1,79926.470588  
1,1,3680.762791  
1,1,4760.500000  
1,1,13209.447674  
1,1,3401.426724  
1,1,2285.155488  
1,1,2897.394737  
1,1,2940.884375  
1,1,1524.887755  
1,1,15940.364583  
1,1,5334.616667  
1,1,1799.878378  
1,1,5255.318452  
1,1,2762.020833  
1,1,7489.827206  
1,1,4191.750000  
1,1,6776.404255  
1,1,3070.739286  
1,1,4279.428125  
1,1,62344.808824  
1,1,2762.769231  
1,1,6700.209302  
1,1,1803.771429  
1,1,2955.293750  
1,1,3745.421053  
1,1,1642.788591  
1,1,8980.963068  
1,1,10968.372093  
1,1,4428.375000  
1,1,2079.750000  
1,1,2436.010417  
1,1,1632.921569  
1,1,3857.573529  
1,1,1670.159375  
1,1,6182.805851  
1,1,2051.150000  
1,1,4270.008065  
1,1,2228.366197  
1,1,1759.568548  
1,1,3685.775000  
1,1,2161.085227  
1,1,2605.053571  
1,1,2398.466912  
1,1,72484.719595  
1,1,2207.761905  
1,1,1622.073171  
1,1,6366.696970  
1,1,1870.955729  
1,1,3548.880597  
1,1,1998.986111  
1,1,3170.434211  
1,1,1858.411765  
1,1,27183.588235  
1,1,1688.976744  
1,1,44892.710938  
1,1,14364.750000  
1,1,3454.250000  
1,1,4468.021277  
1,1,2903.622449

1,1,41146.040541  
1,1,3393.335000  
1,1,2665.000000  
1,1,3209.912500  
1,1,2414.000000  
1,1,5544.175000  
1,1,6326.795918  
1,1,10548.068452  
1,1,3552.554878  
1,1,2168.425595  
1,1,2469.938889  
1,1,6116.019022  
1,1,1588.012097  
1,1,3490.878378  
1,1,6500.917683  
1,1,62477.381579  
1,1,2516.117188  
1,1,18435.562500  
1,1,4542.087500  
1,1,1915.981383  
1,1,5590.233696  
1,1,6394.344595  
1,1,2279.984375  
1,1,2528.148438  
1,1,40746.809783  
1,1,6819.521429  
1,1,89264.702703  
1,1,10597.666667  
1,1,1696.692308  
1,1,5844.017241  
1,1,3043.069444  
1,1,1945.046512  
1,1,2980.050676  
1,1,13698.722973  
1,1,4608.314286  
1,1,2280.833333  
1,1,1735.551136  
1,1,2896.375000  
1,1,4383.100610  
1,1,5212.364865  
1,1,7082.425000  
1,1,45290.634868  
1,1,3565.428571  
1,1,6654.636029  
1,1,95083.196875  
1,1,13002.150000  
1,1,5400.446970  
1,1,1942.198171  
1,1,7044.908163  
1,1,10321.496403  
1,1,3416.481707  
1,1,1797.750000  
1,1,4465.523256  
1,1,2056.622093  
1,1,13056.820652  
1,1,4020.991279  
1,1,3469.875000  
1,1,1805.531250  
1,1,3851.886111  
1,1,3151.462500  
1,1,2089.588415  
1,1,2163.500000  
1,1,2680.088710  
1,1,17660.571429  
1,1,3038.125000  
1,1,1561.482143

1,1,6172.206081  
1,1,9763.435976  
1,1,2087.310811  
1,1,2720.857558  
1,1,3715.595092  
1,1,4189.746212  
1,1,2420.404070  
1,1,4663.043478  
1,1,3584.304688  
1,1,5911.994681  
1,1,8474.824324  
1,1,2331.348837  
1,1,16841.990132  
1,1,5937.277778  
1,1,2311.750000  
1,1,4466.388889  
1,1,11803.772059  
1,1,2507.447368  
1,1,4489.222222  
1,1,9904.375000  
1,1,5773.221154  
1,1,4788.341463  
1,1,2851.799479  
1,1,4873.870690  
1,1,3347.539773  
1,1,6273.588235  
1,1,4289.500000  
1,1,4255.586957  
1,1,1574.256250  
1,1,1656.911765  
1,1,8125.929348  
1,1,1726.793478  
1,1,3038.557432  
1,1,2666.786885  
1,1,9196.381944  
1,1,2596.756696  
1,1,2704.128049  
1,1,5061.012097  
1,1,3362.453237  
1,1,20036.079545  
1,1,2253.230769  
1,1,5326.517045  
1,1,9420.392857  
1,1,2122.343750  
1,1,1662.108696  
1,1,12992.005814  
1,1,1933.085227  
1,1,3463.241758  
1,1,2896.893750  
1,1,1798.007979  
1,1,4535.326531  
1,1,2262.027778  
1,1,2887.734694  
1,1,2182.000000  
1,1,4489.322581  
1,1,5776.800000  
1,1,6142.187500  
1,1,11679.605769  
1,1,2168.766827  
1,1,9103.861486  
1,1,5951.494792  
1,1,10018.864130  
1,1,4139.959559  
1,1,2676.879032  
1,1,3618.794872  
1,1,4600.875000

1,1,6577.875000  
1,1,2471.932927  
1,1,2181.047619  
1,1,2392.553125  
1,1,4958.122093  
1,1,2105.900000  
1,1,7957.062500  
1,1,3882.028571  
1,1,1857.250000  
1,1,3073.051136  
1,1,2136.372024  
1,1,1545.866667  
1,1,11726.853261  
1,1,50991.891892  
1,1,10235.370690  
1,1,4211.497340  
1,1,12985.644737  
1,1,3698.750000  
1,1,2483.125828  
1,1,7097.892857  
1,1,18643.114583  
1,1,6628.392857  
1,1,2575.970395  
1,1,3687.465116  
1,1,3621.368750  
1,1,2194.280612  
1,1,52227.434375  
1,1,7307.031250  
1,1,3511.109375  
1,1,21584.348361  
1,1,2154.833333  
1,1,3959.539773  
1,1,1877.920213  
1,1,4819.335227  
1,1,4451.863636  
1,1,4515.388889  
1,1,2983.703297  
1,1,2577.951807  
1,1,2447.849432  
1,1,1983.312500  
1,1,1680.494318  
1,1,2804.875000  
1,1,2449.392857  
1,1,4004.575000  
1,1,1593.887500  
1,1,2286.533333  
1,1,3510.483333  
1,1,8246.019231  
1,1,2283.736527  
1,1,6947.625000  
1,1,12171.000000  
1,1,1685.403646  
1,1,6180.509615  
1,1,2406.664773  
1,1,2189.653061  
1,1,3387.952381  
1,1,13775.981618  
1,1,3947.763158  
1,1,22721.176829  
1,1,1787.505319  
1,1,1780.415541  
1,1,68870.698529  
1,1,3051.794872  
1,1,2401.348837  
1,1,7678.098361  
1,1,3457.941667

1,1,13523.500000  
1,1,2067.370968  
1,1,1781.473684  
1,1,30870.172222  
1,1,4170.826087  
1,1,2153.567857  
1,1,4782.476744  
1,1,2068.210526  
1,1,3935.463415  
1,1,3190.337209  
1,1,3953.140244  
1,1,30170.028125  
1,1,2281.411111  
1,1,12819.500000  
1,1,6442.161111  
1,1,41847.835938  
1,1,3754.038462  
1,1,16795.955556  
1,1,1717.778409  
1,1,1639.617021  
1,1,7643.772727  
1,1,1878.486486  
1,1,3434.305921  
1,1,1689.062500  
1,1,1529.566667  
1,1,17948.212838  
1,1,3405.400000  
1,1,2578.950000  
1,1,1917.472561  
1,1,3261.908163  
1,1,2309.632653  
1,1,35917.770833  
1,1,6540.237179  
1,1,2305.267045  
1,1,2077.600000  
1,1,2077.110795  
1,1,3271.406977  
1,1,5669.470588  
1,1,4778.837209  
1,1,2354.835000  
1,1,13592.984375  
1,1,1647.408333  
1,1,38590.539474  
1,1,3821.546875  
1,1,1538.000000  
1,1,5012.281915  
1,1,1977.011029  
1,1,5778.916667  
1,1,11465.566901  
1,1,1992.927326  
1,1,2697.519231  
1,1,4473.120690  
1,1,92456.069079  
1,1,22094.395833  
1,1,4566.766520  
1,1,2496.475000  
1,1,1926.756757  
1,1,4596.305031  
1,1,7003.013514  
1,1,10861.172414  
1,1,27716.957143  
1,1,2169.184659  
1,1,16395.395000  
1,1,2529.161184  
1,1,4355.243902  
1,1,2282.896341

1,1,12789.729730  
1,1,2237.283088  
1,1,2613.915441  
1,1,10030.358553  
1,1,2010.741477  
1,1,5465.951389  
1,1,2533.057692  
1,1,7375.935897  
1,1,2578.423077  
1,1,5510.687117  
1,1,5560.400568  
1,1,2996.750000  
1,1,1637.477273  
1,1,4923.571429  
1,1,1682.423780  
1,1,3726.141892  
1,1,3821.950000  
1,1,1687.375000  
1,1,2283.875000  
1,1,8167.111111  
1,1,27379.368421  
1,1,2965.472222  
1,1,5581.455556  
1,1,5339.641304  
1,1,4664.888393  
1,1,88385.886364  
1,1,3891.846154  
1,1,6341.030405  
1,1,4433.264706  
1,1,4133.081081  
1,1,2034.582317  
1,1,13942.242857  
1,1,1932.079787  
1,1,10152.625000  
1,1,7778.546875  
1,1,3078.683962  
1,1,18783.035256  
1,1,8784.600000  
1,1,3702.930233  
1,1,2582.615385  
1,1,5570.937500  
1,1,1579.465649  
1,1,9313.983333  
1,1,3876.636364  
1,1,12891.385135  
1,1,5314.418605  
1,1,1812.200000  
1,1,4433.343750  
1,1,6095.937500  
1,1,3708.206897  
1,1,2152.776786  
1,1,2934.551282  
1,1,8095.664063  
1,1,2194.641447  
1,1,9372.855978  
1,1,2321.533333  
1,1,4117.105114  
1,1,3452.250000  
1,1,4395.548780  
1,1,1725.568182  
1,1,2981.136364  
1,1,21524.014286  
1,1,2361.527778  
1,1,2717.517045  
1,1,3243.168605  
1,1,4276.730114

1,1,1986.973404  
1,1,4412.846774  
1,1,3587.798077  
1,1,18396.500000  
1,1,5675.715909  
1,1,1705.065217  
1,1,4315.022727  
1,1,51909.017857  
1,1,24375.290541  
1,1,4520.644022  
1,1,2939.281250  
1,1,2506.469388  
1,1,8912.468750  
1,1,4116.971429  
1,1,7141.641667  
1,1,12511.657609  
1,1,7842.525000  
1,1,3793.297297  
1,1,2468.255814  
1,1,7201.317308  
1,1,37476.856250  
1,1,3460.296196  
1,1,31087.616667  
1,1,22816.318548  
1,1,1718.933333  
1,1,1779.679487  
1,1,7959.261421  
1,1,3818.551020  
1,1,12025.437500  
1,1,2823.911765  
1,1,3420.435393  
1,1,3136.250000  
1,1,7048.697368  
1,1,7274.150641  
1,1,9875.240132  
1,1,3196.152174  
1,1,180422.863057  
1,1,4677.708333  
1,1,1603.540761  
1,1,3983.578947  
1,1,2428.452206  
1,1,1500.448864  
1,1,3595.090909  
1,1,8639.687500  
1,1,2275.662791  
1,1,25308.663194  
1,1,4134.766667  
1,1,3881.396341  
1,1,3827.151316  
1,1,1541.738372  
1,1,2125.835106  
1,1,114887.000000  
1,1,3429.502907  
1,1,1798.646552  
1,1,2562.659574  
1,1,9250.479730  
1,1,5832.390244  
1,1,11929.577703  
1,1,2150.105263  
1,1,3820.128049  
1,1,14214.904762  
1,1,3222.729167  
1,1,9769.500000  
1,1,116295.354167  
1,1,15160.099359  
1,1,4612.229167

1,1,3060.587500  
1,1,5016.503205  
1,1,66871.607143  
1,1,4127.756410  
1,1,1768.633523  
1,1,4019.179688  
1,1,36829.218750  
1,1,8733.867647  
1,1,87868.196023  
1,1,6857.052632  
1,1,13706.703125  
1,1,4363.341912  
1,1,3702.304348  
1,1,4317.417910  
1,1,2114.916667  
1,1,2342.136364  
1,1,7127.820513  
1,1,3194.190341  
1,1,4184.618421  
1,1,2564.515244  
1,1,2307.618243  
1,1,2115.529412  
1,1,6116.981250  
1,1,9783.015625  
1,1,38972.984375  
1,1,60637.934524  
1,1,7905.823529  
1,1,1938.125000  
1,1,1987.659722  
1,1,11475.186321  
1,1,25011.109756  
1,1,7646.289474  
1,1,4193.236842  
1,1,1666.061224  
1,1,2759.755435  
1,1,5435.951389  
1,1,3183.621212  
1,1,2308.613636  
1,1,9366.007576  
1,1,2074.020833  
1,1,2997.396104  
1,1,6075.562500  
1,1,1633.673077  
1,1,1673.459459  
1,1,1578.581250  
1,1,3710.000000  
1,1,6958.453947  
1,1,11103.493902  
1,1,1855.896277  
1,1,17560.046512  
1,1,1717.805556  
1,1,3598.617188  
1,1,1500.600000  
1,1,2633.203125  
1,1,4209.477987  
1,1,5698.014535  
1,1,17189.191176  
1,1,12209.365385  
1,1,1555.765625  
1,1,6278.172794  
1,1,4634.581006  
1,1,2484.986486  
1,1,1631.079861  
1,1,6761.088710  
1,1,3868.000000  
1,1,42814.787234

1,1,3503.005682  
1,1,1507.462121  
1,1,3254.802632  
1,1,3886.394608  
1,1,2418.110465  
1,1,2133.045455  
1,1,55318.106250  
1,1,70210.093023  
1,1,3450.958333  
1,1,4586.571429  
1,1,6523.712264  
1,1,3260.013889  
1,1,2186.520833  
1,1,4272.285714  
1,1,5826.587500  
1,1,2442.503049  
1,1,4005.541667  
1,1,4628.032787  
1,1,14721.678571  
1,1,4229.900000  
1,1,1985.770833  
1,1,4702.117021  
1,1,3010.727273  
1,1,3630.392857  
1,1,2403.638889  
1,1,4115.279070  
1,1,6179.000000  
1,1,2245.437500  
1,1,5578.533784  
1,1,2255.250000  
1,1,1891.000000  
1,1,7092.465909  
1,1,13252.481250  
1,1,5850.384615  
1,1,3881.500000  
1,1,2018.615385  
1,1,2595.279070  
1,1,2171.956522  
1,1,2017.021739  
1,1,51500.771429  
1,1,2991.683140  
1,1,5564.752778  
1,1,3070.357143  
1,1,3185.461538  
1,1,2526.895833  
1,1,2784.278646  
1,1,4733.413462  
1,1,2982.826087  
1,1,2740.383929  
1,1,1728.458333  
1,1,1922.534722  
1,1,8666.000000  
1,1,5453.886628  
1,1,4691.864362  
1,1,3621.996212  
1,1,22832.981707  
1,1,4937.470982  
1,1,3350.369898  
1,1,1764.798469  
1,1,3059.108333  
1,1,1675.390625  
1,1,1543.007576  
1,1,8889.277174  
1,1,1929.531915  
1,1,3461.281250  
1,1,2081.756410

1,1,4570.644737  
1,1,2296.778846  
1,1,4039.062500  
1,1,2296.682432  
1,1,55068.093750  
1,1,3617.264706  
1,1,18649.713816  
1,1,2051.014706  
1,1,2671.156250  
1,1,1669.612805  
1,1,3364.282051  
1,1,2212.885135  
1,1,2521.934896  
1,1,7715.726190  
1,1,10458.622093  
1,1,3236.714286  
1,1,3954.954545  
1,1,6813.838542  
1,1,1733.848684  
1,1,3503.928125  
1,1,2298.489130  
1,1,2905.052486  
1,1,2756.234375  
1,1,4145.750000  
1,1,4506.915179  
1,1,1642.919643  
1,1,40481.868902  
1,1,1902.540698  
1,1,2005.320833  
1,1,3739.304348  
1,1,4476.429348  
1,1,1806.684524  
1,1,10908.940141  
1,1,5435.617647  
1,1,6115.179688  
1,1,10571.267045  
1,1,3081.107143  
1,1,2901.293605  
1,1,2028.720588  
1,1,4851.312500  
1,1,18849.793478  
1,1,3790.477941  
1,1,5100.450000  
1,1,1937.397436  
1,1,1915.864583  
1,1,2049.312500  
1,1,5172.792254  
1,1,1699.437500  
1,1,2293.833333  
1,1,1895.106061  
1,1,4192.211957  
1,1,3468.703947  
1,1,6933.450000  
1,1,1827.083333  
1,1,2075.256579  
1,1,4743.572368  
1,1,1893.046961  
1,1,57649.641892  
1,1,2040.623037  
1,1,1986.081395  
1,1,3302.816860  
1,1,1550.365385  
1,1,3403.400000  
1,1,1840.548780  
1,1,3117.461538  
1,1,2585.931818

1,1,1688.733333  
1,1,2227.241935  
1,1,188515.977273  
1,1,3698.928571  
1,1,7667.971429  
1,1,6229.777027  
1,1,3952.129747  
1,1,2401.917553  
1,1,2545.028409  
1,1,16175.142857  
1,1,5644.826087  
1,1,11538.215278  
1,1,4901.541667  
1,1,47221.133333  
1,1,2418.341463  
1,1,4922.045455  
1,1,3836.955556  
1,1,2311.300000  
1,1,2370.930233  
1,1,2748.187500  
1,1,6088.015152  
1,1,2455.966667  
1,1,7142.750000  
1,1,2331.121711  
1,1,1660.151042  
1,1,4238.396226  
1,1,9573.339286  
1,1,1850.888514  
1,1,7155.885714  
1,1,2940.986111  
1,1,3342.197368  
1,1,3271.350000  
1,1,22600.329268  
1,1,1966.875000  
1,1,9535.976744  
1,1,3508.312500  
1,1,18288.945312  
1,1,19301.606061  
1,1,2598.015957  
1,1,47239.911111  
1,1,23923.916667  
1,1,14609.438889  
1,1,1766.033784  
1,1,1855.648649  
1,1,2179.250000  
1,1,2420.053571  
1,1,4434.375000  
1,1,2162.801282  
1,1,7257.836864  
1,1,1771.419643  
1,1,20033.697674  
1,1,1860.218750  
1,1,68047.480769  
1,1,4817.437500  
1,1,3247.888889  
1,1,2510.716667  
1,1,2117.500000  
1,1,1850.217391  
1,1,2009.820513  
1,1,85780.500000  
1,1,6719.317308  
1,1,15001.524390  
1,1,1507.563953  
1,1,7089.678571  
1,1,14729.860294  
1,1,1700.725000

1,1,1606.496795  
1,1,7688.764706  
1,1,4209.276596  
1,1,1609.628205  
1,1,6089.382143  
1,1,6152.835714  
1,1,3730.770161  
1,1,2655.125000  
1,1,10784.048077  
1,1,2941.786585  
1,1,7246.588889  
1,1,25385.829545  
1,1,1615.361413  
1,1,2791.898438  
1,1,14602.350000  
1,1,9944.762500  
1,1,1551.341216  
1,1,3613.326923  
1,1,2463.725000  
1,1,2989.411765  
1,1,13903.581522  
1,1,1569.778846  
1,1,4829.750000  
1,1,1613.654891  
1,1,111322.578947  
1,1,27175.937500  
1,1,3663.735484  
1,1,2476.965909  
1,1,2311.688889  
1,1,3306.648438  
1,1,6577.442568  
1,1,15617.720930  
1,1,3703.717391  
1,1,6649.903226  
1,1,2120.821429  
1,1,4122.906250  
1,1,15365.936508  
1,1,5624.242647  
1,1,2074.434211  
1,1,3373.910256  
1,1,2103.723404  
1,1,4085.017857  
1,1,2515.631579  
1,1,3378.108696  
1,1,13305.595238  
1,1,11833.655488  
1,1,4615.602941  
1,1,4163.549419  
1,1,2370.258929  
1,1,7313.250000  
1,1,1660.662162  
1,1,2356.808176  
1,1,3423.923077  
1,1,1752.331395  
1,1,48352.575758  
1,1,1587.287500  
1,1,6806.425676  
1,1,7807.689815  
1,1,4806.047059  
1,1,4959.777778  
1,1,6440.663743  
1,1,2289.817568  
1,1,3328.357143  
1,1,3860.892045  
1,1,11472.375000  
1,1,9725.125000

1,1,4232.361272  
1,1,5148.048077  
1,1,2577.767442  
1,1,118956.818182  
1,1,4232.000000  
1,1,2183.950000  
1,1,2134.434659  
1,1,7745.678571  
1,1,4392.041667  
1,1,2345.333333  
1,1,2508.256410  
1,1,3650.784091  
1,1,3900.030864  
1,1,5049.434211  
1,1,5314.439286  
1,1,1793.214286  
1,1,7645.284916  
1,1,1969.244898  
1,1,78026.692771  
1,1,3552.750000  
1,1,14320.284375  
1,1,3293.930851  
1,1,22963.354167  
1,1,1603.726190  
1,1,2122.480769  
1,1,1526.648649  
1,1,5306.000000  
1,1,1844.203571  
1,1,3660.540441  
1,1,2217.409091  
1,1,1827.308333  
1,1,6825.310976  
1,1,2251.744681  
1,1,3911.690476  
1,1,3014.225000  
1,1,3413.783333  
1,1,14925.634615  
1,1,5407.564815  
1,1,33704.432692  
1,1,9836.500000  
1,1,4017.822368  
1,1,15591.963415  
1,1,2018.621711  
1,1,2034.495000  
1,1,1662.500000  
1,1,3000.734043  
1,1,4758.010638  
1,1,3152.335714  
1,1,8576.951220  
1,1,2958.879032  
1,1,2110.000000  
1,1,2000.240854  
1,1,10956.988372  
1,1,1617.430851  
1,1,6484.033149  
1,1,1739.125000  
1,1,1906.182143  
1,1,4810.925676  
1,1,3901.003378  
1,1,5417.067568  
1,1,2848.785714  
1,1,3969.593750  
1,1,2019.312500  
1,1,11055.134615  
1,1,4221.666667  
1,1,18630.187500

1,1,1651.630682  
1,1,4726.025000  
1,1,1523.980769  
1,1,2214.806250  
1,1,1729.134146  
1,1,4851.139344  
1,1,4089.652174  
1,1,2341.374233  
1,1,5997.446809  
1,1,3516.149701  
1,1,1518.500000  
1,1,2394.652778  
1,1,2511.936047  
1,1,14888.877660  
1,1,2234.750000  
1,1,5046.854545  
1,1,2684.909375  
1,1,3260.612245  
1,1,2456.232955  
1,1,1816.369318  
1,1,82533.040541  
1,1,2054.314103  
1,1,6096.192308  
1,1,24244.661765  
1,1,2458.304348  
1,1,37160.302419  
1,1,3510.576923  
1,1,156936.328125  
1,1,47593.372159  
1,1,4630.179487  
1,1,11599.017857  
1,1,13987.357143  
1,1,2394.388158  
1,1,1568.070312  
1,1,2025.467742  
1,1,1791.636364  
1,1,5325.071429  
1,1,9128.652174  
1,1,2680.026596  
1,1,4129.823529  
1,1,2024.302632  
1,1,6815.633523  
1,1,2851.028846  
1,1,2440.493902  
1,1,29151.012500  
1,1,1673.611650  
1,1,2350.000000  
1,1,2140.694444  
1,1,2389.714286  
1,1,1734.144737  
1,1,2336.884615  
1,1,2107.466667  
1,1,1538.308140  
1,1,12886.121622  
1,1,4280.950000  
1,1,4421.082237  
1,1,22383.613636  
1,1,1977.110714  
1,1,2460.135870  
1,1,23370.444444  
1,1,6924.336735  
1,1,1592.464286  
1,1,7376.086957  
1,1,3924.976744  
1,1,2885.198370  
1,1,3573.562500

1,1,15810.885135  
1,1,7421.166667  
1,1,3025.656250  
1,1,2077.558140  
1,1,9171.896739  
1,1,2564.339286  
1,1,6426.267857  
1,1,1841.294118  
1,1,4978.000000  
1,1,2268.620968  
1,1,43455.327206  
1,1,1511.986111  
1,1,2282.086957  
1,1,2013.795213  
1,1,3599.390909  
1,1,2331.051282  
1,1,26517.482558  
1,1,1647.313889  
1,1,1903.472973  
1,1,2601.811047  
1,1,1963.148649  
1,1,2368.706250  
1,1,3129.500000  
1,1,5038.288770  
1,1,3771.500000  
1,1,4268.525568  
1,1,6837.307692  
1,1,3250.179878  
1,1,3731.524510  
1,1,2419.802083  
1,1,2812.750000  
1,1,2248.086957  
1,1,2041.270270  
1,1,7736.468750  
1,1,3596.280488  
1,1,3192.959239  
1,1,16850.775862  
1,1,4655.792553  
1,1,1676.164634  
1,1,3517.585366  
1,1,4115.821809  
1,1,9986.785714  
1,1,2740.596875  
1,1,5977.237179  
1,1,3328.836207  
1,1,3951.232558  
1,1,5738.862805  
1,1,1703.150000  
1,1,6690.756579  
1,1,1524.685714  
1,1,26098.171512  
1,1,2494.216667  
1,1,2287.830357  
1,1,2899.993902  
1,1,65716.422222  
1,1,8181.500000  
1,1,2438.038194  
1,1,4485.529412  
1,1,2039.768750  
1,1,31989.237342  
1,1,1915.778571  
1,1,2574.735294  
1,1,8433.861111  
1,1,2210.250000  
1,1,1667.027027  
1,1,72433.096154

1,1,42087.986111  
1,1,1783.583333  
1,1,1811.782609  
1,1,10039.500000  
1,1,3653.114130  
1,1,4335.750000  
1,1,2031.257895  
1,1,8335.078947  
1,1,3223.070513  
1,1,6327.642045  
1,1,3076.102273  
1,1,3790.702206  
1,1,2064.287234  
1,1,1926.696429  
1,1,11745.330882  
1,1,1907.210227  
1,1,7331.600000  
1,1,4658.566860  
1,1,4192.635417  
1,1,2584.384615  
1,1,3060.971429  
1,1,47118.475610  
1,1,3102.292683  
1,1,50981.815972  
1,1,4143.392857  
1,1,2189.959302  
1,1,6338.588235  
1,1,3422.519022  
1,1,5714.673913  
1,1,6616.071809  
1,1,3319.068182  
1,1,192460.320000  
1,1,14489.964286  
1,1,1739.625000  
1,1,1768.586538  
1,1,2457.677184  
1,1,1533.335227  
1,1,4057.647727  
1,1,1643.500000  
1,1,1709.409884  
1,1,3936.279070  
1,1,1655.600000  
1,1,23378.046512  
1,1,2824.812500  
1,1,5249.277778  
1,1,1919.200581  
1,1,5100.312500  
1,1,1659.804348  
1,1,18798.214286  
1,1,3964.678571  
1,1,44952.666667  
1,1,7445.500000  
1,1,3106.179348  
1,1,1812.456250  
1,1,6056.552326  
1,1,4068.345395  
1,1,2860.875000  
1,1,2040.029412  
1,1,1997.715116  
1,1,12302.213889  
1,1,2267.882353  
1,1,2091.135714  
1,1,2190.733108  
1,1,2384.420455  
1,1,1515.948718  
1,1,5524.135135

1,1,4007.391304  
1,1,1500.325000  
1,1,1917.060897  
1,1,57233.446023  
1,1,1790.466667  
1,1,7621.482143  
1,1,1626.500000  
1,1,7163.907407  
1,1,3244.985000  
1,1,1792.979167  
1,1,2250.038462  
1,1,2103.898438  
1,1,4350.059783  
1,1,5276.214286  
1,1,3630.770833  
1,1,2904.683824  
1,1,1651.240196  
1,1,1510.250000  
1,1,11763.413043  
1,1,12836.195946  
1,1,7065.725543  
1,1,5020.166667  
1,1,10622.678571  
1,1,1500.562500  
1,1,2421.000000  
1,1,5116.003378  
1,1,12761.040698  
1,1,5936.872024  
1,1,2403.471591  
1,1,5297.137255  
1,1,12276.690972  
1,1,7671.875000  
1,1,6638.400000  
1,1,1535.150000  
1,1,61995.950000  
1,1,4294.588235  
1,1,3429.000000  
1,1,13625.621622  
1,1,2982.489583  
1,1,8029.904762  
1,1,3499.608696  
1,1,2497.051136  
1,1,8930.357143  
1,1,4266.383333  
1,1,6397.217105  
1,1,35456.164474  
1,1,4579.265625  
1,1,14319.853774  
1,1,5525.041667  
1,1,3163.000000  
1,1,1889.291667  
1,1,5076.917683  
1,1,2549.323171  
1,1,3847.012755  
1,1,1574.492188  
1,1,4237.121711  
1,1,4770.333333  
1,1,13219.348837  
1,1,4075.597222  
1,1,141833.492021  
1,1,6393.093750  
1,1,2109.311111  
1,1,8757.121094  
1,1,2033.228125  
1,1,7648.272222  
1,1,3110.000000

1,1,4087.484375  
1,1,1593.326923  
1,1,12004.477564  
1,1,1556.791667  
1,1,1834.732143  
1,1,5113.963542  
1,1,4204.777778  
1,1,3924.500000  
1,1,3396.657738  
1,1,2016.973404  
1,1,1983.660714  
1,1,2211.065789  
1,1,53036.323529  
1,1,2506.270408  
1,1,3423.000000  
1,1,1782.988889  
1,1,2405.520349  
1,1,1925.627778  
1,1,2473.000000  
1,1,4713.256757  
1,1,3637.325000  
1,1,1859.742424  
1,1,1660.471354  
1,1,92155.544643  
1,1,1801.594828  
1,1,3780.166667  
1,1,36403.255435  
1,1,22027.128378  
1,1,15911.117647  
1,1,2475.375000  
1,1,5919.726974  
1,1,3490.250000  
1,1,3477.666667  
1,1,2466.809524  
1,1,1882.023256  
1,1,1708.428571  
1,1,2059.253676  
1,1,1524.350610  
1,1,2450.032738  
1,1,2472.307692  
1,1,4708.900000  
1,1,6357.675000  
1,1,5411.489130  
1,1,3731.159574  
1,1,3619.636364  
1,1,3161.281250  
1,1,3059.333333  
1,1,2609.008929  
1,1,42003.000000  
1,1,10261.733696  
1,1,1720.182432  
1,1,5349.783854  
1,1,2045.036585  
1,1,2779.505814  
1,1,3895.909091  
1,1,2636.389881  
1,1,2571.458333  
1,1,6063.044872  
1,1,4732.709677  
1,1,1501.029605  
1,1,1748.400000  
1,1,23058.738636  
1,1,2664.333333  
1,1,2245.509146  
1,1,1893.585714  
1,1,3991.138889

1,1,3716.190625  
1,1,2427.738889  
1,1,1690.616071  
1,1,2786.482143  
1,1,1633.527439  
1,1,22937.721591  
1,1,3314.960938  
1,1,3130.538889  
1,1,9320.536765  
1,1,1974.500000  
1,1,42943.714286  
1,1,52361.381579  
1,1,4278.140625  
1,1,16135.568182  
1,1,3541.445312  
1,1,4313.090278  
1,1,21312.816489  
1,1,7074.847134  
1,1,62768.416667  
1,1,8168.093023  
1,1,5191.731250  
1,1,2818.855263  
1,1,4027.837264  
1,1,3597.333333  
1,1,4370.307143  
1,1,2699.846591  
1,1,4771.017857  
2,2,1668.465116  
2,2,1948.058824  
2,2,2506.548913  
2,2,16408.241071  
2,2,4129.072674  
2,2,3029.085714  
2,2,5687.636364  
2,2,2735.042105  
2,2,9976.083333  
2,2,4824.486111  
2,2,2180.594298  
2,2,2060.205882  
2,2,1860.562500  
2,2,1516.828125  
2,2,2703.000000  
2,2,3202.164894  
2,2,1895.621951  
2,2,2163.315789  
2,2,2391.736842  
2,2,2107.666667  
2,2,2475.256818  
2,2,1769.756098  
2,2,2089.901961  
2,2,2127.319444  
2,2,1519.038462  
2,2,3061.872928  
2,2,2181.371429  
2,2,3673.500000  
2,2,3561.844595  
2,2,2239.923497  
2,2,5643.031447  
2,2,10000.957317  
2,2,2454.857143  
2,2,1559.846154  
2,2,4899.785714  
2,2,2157.453947  
2,2,4627.555556  
2,2,2385.280702  
2,2,1927.269737

2,2,1886.509375  
2,2,3560.520833  
2,2,1816.967857  
2,2,5275.946108  
2,2,2611.719298  
2,2,1584.621622  
2,2,4096.807692  
2,2,16341.976744  
2,2,1805.544118  
2,2,2853.936842  
2,2,2862.522472  
2,2,2187.005435  
2,2,5104.222892  
2,2,2174.540698  
2,2,1911.520833  
2,2,6237.693548  
2,2,2296.967742  
2,2,2897.646739  
2,2,4964.750000  
2,2,3215.255319  
2,2,13667.265306  
2,2,2763.827381  
2,2,2648.442708  
2,2,2794.291667  
2,2,6218.187500  
2,2,13987.580000  
2,2,1653.147059  
2,2,2789.826923  
2,2,5796.900474  
2,2,2490.200000  
2,2,12596.000000  
2,2,7003.878049  
2,2,3004.752809  
2,2,5753.317935  
2,2,3834.520408  
2,2,1534.031250  
2,2,6242.676471  
2,2,6580.697674  
2,2,1642.072917  
2,2,3376.468750  
2,2,13484.300676  
2,2,3023.314815  
2,2,1775.604651  
2,2,2659.113636  
2,2,3499.803125  
2,2,3313.767045  
2,2,2126.459135  
2,2,3125.083333  
2,2,2040.921569  
2,2,3759.083333  
2,2,1669.173077  
2,2,3732.942308  
2,2,4500.521739  
2,2,5329.913043  
2,2,7812.668508  
2,2,2553.921466  
2,2,5886.985537  
2,2,2761.539683  
2,2,1702.143293  
2,2,3038.887417  
2,2,1851.668449  
2,2,4053.258242  
2,2,3095.920000  
2,2,5301.755435  
2,2,1643.857143  
2,2,3704.447368

2,2,9121.944444  
2,2,2305.787234  
2,2,1901.490385  
2,2,1785.915000  
2,2,2415.215686  
2,2,3956.552778  
2,2,3396.000000  
2,2,3089.879808  
2,2,6976.102941  
2,2,11336.401042  
2,2,2377.500000  
2,2,3662.308333  
2,2,2684.750000  
2,2,5487.385870  
2,2,1650.569444  
2,2,1554.817610  
2,2,3614.860000  
2,2,2417.500000  
2,2,19713.526596  
2,2,2835.892045  
2,2,6480.969512  
2,2,1540.344828  
2,2,2707.387097  
2,2,1519.300000  
2,2,1724.418919  
2,2,3893.142857  
2,2,3147.245000  
2,2,1665.744792  
2,2,1727.404605  
2,2,4415.250000  
2,2,2696.381579  
2,2,2283.352273  
2,2,1580.677419  
2,2,2342.833333  
2,2,5108.571429  
2,2,1896.714286  
2,2,3013.993590  
2,2,3116.838068  
2,2,3318.608108  
2,2,4122.487805  
2,2,2781.813953  
2,2,1750.000000  
2,2,2887.445946  
2,2,2019.221154  
2,2,1694.414062  
2,2,1520.688776  
2,2,2439.997093  
2,2,1576.125000  
2,2,6197.078947  
2,2,2686.398104  
2,2,5772.834437  
2,2,3438.250000  
2,2,2335.734848  
2,2,1597.408163  
2,2,9868.161932  
2,2,12814.087264  
2,2,9827.641975  
2,2,3590.841530  
2,2,6733.259146  
2,2,3516.554054  
2,2,2022.992424  
2,2,1702.557065  
2,2,2283.790541  
2,2,4259.750000  
2,2,2159.128125  
2,2,15170.342105

2,2,3728.817308  
2,2,5290.287582  
2,2,6736.882629  
2,2,2885.785714  
2,2,1960.777778  
2,2,2097.712500  
2,2,2706.288265  
2,2,1803.968750  
2,2,3969.295918  
2,2,4932.270833  
2,2,9740.851351  
2,2,7090.171498  
2,2,2467.931818  
2,2,4938.341346  
2,2,1969.818713  
2,2,6118.042553  
2,2,1671.456731  
2,2,2018.020270  
2,2,4291.682927  
2,2,1585.148810  
2,2,4885.209302  
2,2,3028.916667  
2,2,3569.640244  
2,2,2328.428571  
2,2,3775.055556  
2,2,5142.666667  
2,2,1848.071429  
2,2,3369.828804  
2,2,2749.067308  
2,2,6365.146875  
2,2,2524.987730  
2,2,5430.536585  
2,2,2042.914474  
2,2,2674.572368  
2,2,2451.515625  
2,2,1730.650000  
2,2,3146.872222  
2,2,1760.054348  
2,2,2258.506410  
2,2,2834.988095  
2,2,4836.750000  
2,2,8620.872396  
2,2,3578.692308  
2,2,2813.100000  
2,2,1763.615385  
2,2,5822.100000  
2,2,6302.153846  
2,2,7908.547945  
2,2,2021.462766  
2,2,5882.551724  
2,2,1580.767857  
2,2,3069.236111  
2,2,1652.034314  
2,2,2870.658654  
2,2,2042.959302  
2,2,6059.040816  
2,2,5133.408654  
2,2,2084.182927  
2,2,1574.603774  
2,2,1620.718023  
2,2,1580.532609  
2,2,5593.375000  
2,2,4490.347727  
2,2,1505.543269  
2,2,1521.057692  
2,2,1590.485795

2,2,1990.651316  
2,2,5216.016667  
2,2,4331.737805  
2,2,3990.781818  
2,2,3212.458333  
2,2,8787.201923  
2,2,18469.552778  
2,2,4113.562500  
2,2,2494.420000  
2,2,1900.340517  
2,2,3946.571429  
2,2,4361.152174  
2,2,2476.959184  
2,2,2800.860465  
2,2,2724.649390  
2,2,6647.349057  
2,2,3110.047619  
2,2,1580.046512  
2,2,2126.370588  
2,2,1622.653846  
2,2,5779.542614  
2,2,2929.548469  
2,2,1785.140306  
2,2,1621.300676  
2,2,2301.521875  
2,2,4226.702857  
2,2,1634.735897  
2,2,2097.748879  
2,2,2334.755682  
2,2,2245.225694  
2,2,4057.128472  
2,2,3262.678571  
2,2,3676.500000  
2,2,2557.732143  
2,2,2537.895000  
2,2,1702.010714  
2,2,3419.000000  
2,2,2779.802139  
2,2,1595.631757  
2,2,2436.225000  
2,2,2162.102041  
2,2,3584.337209  
2,2,11455.334746  
2,2,3070.914634  
2,2,14720.784091  
2,2,1799.909884  
2,2,1565.598214  
2,2,4863.896186  
2,2,2276.365854  
2,2,1941.744681  
2,2,10068.653409  
2,2,2867.681250  
2,2,3150.095238  
2,2,6692.794872  
2,2,5506.594595  
2,2,2802.834906  
2,2,7222.441026  
2,2,1510.138462  
2,2,1536.380682  
2,2,4066.084746  
2,2,2078.250000  
2,2,3049.618243  
2,2,1721.631410  
2,2,3328.703947  
2,2,8693.012500  
2,2,4131.086957

2,2,3201.630952  
2,2,3340.892857  
2,2,2421.348039  
2,2,1693.418605  
2,2,5093.410000  
2,2,1577.627660  
2,2,2546.726562  
2,2,2688.980263  
2,2,2100.698718  
2,2,3073.033333  
2,2,1912.951923  
2,2,3234.740385  
2,2,1594.451923  
2,2,2965.731132  
2,2,4591.304545  
2,2,2199.013889  
2,2,2988.706395  
2,2,2701.060096  
2,2,1512.505682  
2,2,2435.605769  
2,2,10588.708333  
2,2,13608.973958  
2,2,4594.250000  
2,2,7130.875000  
2,2,2009.225000  
2,2,3327.112745  
2,2,4209.628205  
2,2,5371.440000  
2,2,3555.354167  
2,2,1581.100000  
2,2,7587.196809  
2,2,2809.966463  
2,2,1628.692308  
2,2,17611.048780  
2,2,3557.538462  
2,2,5044.166667  
2,2,2020.825658  
2,2,6200.161765  
2,2,8042.485795  
2,2,1522.603774  
2,2,2236.095745  
2,2,3212.479167  
2,2,15424.263889  
2,2,5905.146919  
2,2,2561.990854  
2,2,2133.000000  
2,2,2414.519231  
2,2,2152.812834  
2,2,2035.187500  
2,2,3676.297872  
2,2,1751.378378  
2,2,1758.183673  
2,2,11294.052273  
2,2,2262.590909  
2,2,2892.127358  
2,2,7094.000000  
2,2,6565.035928  
2,2,1786.031250  
2,2,2693.932692  
2,2,4057.306818  
2,2,2377.460227  
2,2,1950.105263  
2,2,8007.759615  
2,2,1691.809524  
2,2,4604.418750  
2,2,2123.837209

2,2,2792.961538  
2,2,2054.230769  
2,2,1686.040625  
2,2,2483.384615  
2,2,1802.947368  
2,2,2352.994681  
2,2,7807.916667  
2,2,9610.137255  
2,2,2826.600000  
2,2,1670.600000  
2,2,3720.522959  
2,2,7864.784314  
2,2,1888.181250  
2,2,2009.100000  
2,2,2355.684783  
2,2,1834.846154  
2,2,5502.905172  
2,2,8487.589744  
2,2,3655.663043  
2,2,2388.975610  
2,2,2233.720000  
2,2,1721.934659  
2,2,4214.115854  
2,2,2646.250000  
2,2,7265.672222  
2,2,4324.066667  
2,2,7733.457317  
2,2,2306.312500  
2,2,10504.666667  
2,2,4327.036199  
2,2,2748.312500  
2,2,2507.339450  
2,2,2563.000000  
2,2,2142.243750  
2,2,4887.569149  
2,2,11377.006410  
2,2,4130.808824  
2,2,2331.146739  
2,2,2550.558140  
2,2,2521.486486  
2,2,5000.656250  
2,2,1659.809524  
2,2,3382.531915  
2,2,3197.291667  
2,2,3090.605634  
2,2,3439.361702  
2,2,2110.697368  
2,2,3422.416667  
2,2,1840.671053  
2,2,2326.712575  
2,2,17489.103774  
2,2,3614.859375  
2,2,3202.049505  
2,2,1840.878472  
2,2,9067.290816  
2,2,1782.449468  
2,2,2828.385870  
2,2,3943.880952  
2,2,1746.766667  
2,2,2939.492188  
2,2,1876.602339  
2,2,1503.000000  
2,2,2001.555556  
2,2,4225.718750  
2,2,4709.993865  
2,2,8838.314516

2,2,1965.053571  
2,2,4036.286184  
2,2,17477.515625  
2,2,2780.429878  
2,2,6037.154070  
2,2,4504.517045  
2,2,1915.774038  
2,2,3498.615385  
2,2,3609.756098  
2,2,4306.703804  
2,2,2050.748603  
2,2,3103.205882  
2,2,13647.208333  
2,2,85032.611111  
2,2,1652.209375  
2,2,4915.720238  
2,2,4305.535714  
2,2,10003.893258  
2,2,1841.331250  
2,2,4898.890625  
2,2,1524.587500  
2,2,3823.882979  
2,2,2402.125000  
2,2,2505.557870  
2,2,4327.346939  
2,2,2303.167614  
2,2,3013.384615  
2,2,5263.950000  
2,2,2634.615646  
2,2,1960.711538  
2,2,2059.777273  
2,2,3930.272727  
2,2,1840.241379  
2,2,2692.096875  
2,2,2448.000000  
2,2,2090.472973  
2,2,4838.914773  
2,2,2557.307692  
2,2,1641.687500  
2,2,2426.712766  
2,2,2307.452830  
2,2,4121.956954  
2,2,1544.800000  
2,2,1744.148936  
2,2,9925.780000  
2,2,2497.986111  
2,2,2614.348837  
2,2,1929.500000  
2,2,5014.528302  
2,2,3525.706897  
2,2,3761.164773  
2,2,9959.494681  
2,2,8542.078947  
2,2,2056.312500  
2,2,3217.627907  
2,2,1665.093750  
2,2,6149.041667  
2,2,7652.437500  
2,2,6394.112245  
2,2,3862.125532  
2,2,4634.791667  
2,2,3709.934896  
2,2,3291.168712  
2,2,2133.500000  
2,2,11747.489362  
2,2,3695.812500

2,2,3005.367500  
2,2,5393.368304  
2,2,2736.165803  
2,2,9138.672500  
2,2,2400.192308  
2,2,3088.467290  
2,2,4827.856250  
2,2,3333.602041  
2,2,2132.024457  
2,2,1560.533784  
2,2,10255.475410  
2,2,4443.386364  
2,2,1608.983957  
2,2,8324.943182  
2,2,4304.925000  
2,2,2989.487981  
2,2,10593.419643  
2,2,1662.896341  
2,2,2399.382353  
2,2,8790.505000  
2,2,3611.764706  
2,2,3358.952128  
2,2,2903.985795  
2,2,12004.879310  
2,2,1833.893333  
2,2,5377.372642  
2,2,3041.250000  
2,2,2662.980769  
2,2,2202.576705  
2,2,1762.820513  
2,2,3921.454082  
2,2,7840.401163  
2,2,4665.830769  
2,2,4018.554054  
2,2,3689.863095  
2,2,3100.379808  
2,2,1699.219907  
2,2,6175.510204  
2,2,1518.786585  
2,2,3034.812500  
2,2,1736.296875  
2,2,2589.142857  
2,2,5110.822368  
2,2,1712.413043  
2,2,3035.761628  
2,2,14276.483051  
2,2,1945.892857  
2,2,1920.437500  
2,2,1901.161111  
2,2,3183.705882  
2,2,5859.500000  
2,2,3501.925000  
2,2,8993.750000  
2,2,6501.776596  
2,2,7265.671512  
2,2,1618.489130  
2,2,2402.875000  
2,2,3236.934211  
2,2,8246.301370  
2,2,2176.008152  
2,2,11453.900000  
2,2,3195.940217  
2,2,1911.229167  
2,2,4612.480392  
2,2,8286.798969  
2,2,3047.341837

2,2,10398.270408  
2,2,2631.762195  
2,2,2440.096774  
2,2,1634.853261  
2,2,2862.777778  
2,2,2066.617021  
2,2,1500.908537  
2,2,2542.639831  
2,2,5506.394089  
2,2,6051.751397  
2,2,2425.068452  
2,2,1716.259542  
2,2,3610.578704  
2,2,5531.062500  
2,2,2777.653125  
2,2,11750.469388  
2,2,13618.090909  
2,2,9129.145833  
2,2,4215.048077  
2,2,4775.730000  
2,2,2192.037500  
2,2,2305.005208  
2,2,4420.117647  
2,2,3305.085106  
2,2,3739.600000  
2,2,3658.700000  
2,2,15561.718750  
2,2,5728.441489  
2,2,1585.056818  
2,2,3510.967105  
2,2,1751.553571  
2,2,3042.031915  
2,2,1990.553571  
2,2,5761.877907  
2,2,2623.600000  
2,2,2657.795918  
2,2,8222.372449  
2,2,1523.344512  
2,2,3972.142045  
2,2,1816.594444  
2,2,4481.696429  
2,2,3301.714623  
2,2,3781.457317  
2,2,2008.047297  
2,2,2338.822917  
2,2,2927.750000  
2,2,1573.443182  
2,2,12614.612805  
2,2,1548.396875  
2,2,1523.436047  
2,2,4958.105978  
2,2,1901.903061  
2,2,1666.798077  
2,2,10364.200000  
2,2,4543.656863  
2,2,5601.640000  
2,2,2263.050926  
2,2,10427.425532  
2,2,4910.277439  
2,2,1735.443299  
2,2,5979.284653  
2,2,1983.252976  
2,2,1997.478261  
2,2,6909.240385  
2,2,3812.049020  
2,2,1773.166667

2,2,3555.886905  
2,2,3927.750000  
2,2,2602.890244  
2,2,2999.287234  
2,2,1824.818182  
2,2,5688.502941  
2,2,2095.591549  
2,2,1666.042169  
2,2,1637.229730  
2,2,6446.625000  
2,2,3131.625571  
2,2,2455.350000  
2,2,2040.300000  
2,2,2585.319149  
2,2,1568.755682  
2,2,4125.315104  
2,2,7641.369347  
2,2,2093.214286  
2,2,1544.975000  
2,2,8313.484649  
2,2,1696.230769  
2,2,14300.985294  
2,2,3812.083333  
2,2,8295.700000  
2,2,12305.204036  
2,2,4813.196429  
2,2,1650.812500  
2,2,2840.266026  
2,2,2186.655702  
2,2,2518.452128  
2,2,1557.062500  
2,2,3233.232143  
2,2,1653.052632  
2,2,1906.695000  
2,2,4713.226974  
2,2,5164.723404  
2,2,1672.377660  
2,2,5041.255102  
2,2,2552.763889  
2,2,2424.403061  
2,2,1600.075000  
2,2,1573.414474  
2,2,2815.068878  
2,2,2318.974359  
2,2,3940.727273  
2,2,3983.578947  
2,2,7423.050000  
2,2,4480.750000  
2,2,1555.628049  
2,2,5090.824468  
2,2,2271.844595  
2,2,2618.468750  
2,2,1673.408537  
2,2,20042.652778  
2,2,2521.562500  
2,2,2591.308140  
2,2,2189.872093  
2,2,5743.963415  
2,2,6009.610577  
2,2,2943.731707  
2,2,5754.531915  
2,2,2297.600000  
2,2,5829.419118  
2,2,3625.533537  
2,2,6084.377551  
2,2,3227.817073

2,2,1779.325581  
2,2,2621.875000  
2,2,3276.931250  
2,2,3971.762500  
2,2,2040.533163  
2,2,2342.175595  
2,2,3845.812500  
2,2,37065.678125  
2,2,3173.104167  
2,2,3346.495283  
2,2,3418.330882  
2,2,5645.433333  
2,2,4263.363636  
2,2,9799.147059  
2,2,2242.732955  
2,2,5245.590000  
2,2,5692.052632  
2,2,4486.000000  
2,2,1970.163265  
2,2,2750.640625  
2,2,1899.045455  
2,2,1900.937500  
2,2,2837.250000  
2,2,2575.133333  
2,2,1572.408019  
2,2,4292.070968  
2,2,2034.661765  
2,2,19882.209677  
2,2,3336.949495  
2,2,4088.750000  
2,2,5345.090909  
2,2,1694.500000  
2,2,3078.750000  
2,2,3920.362745  
2,2,6033.464674  
2,2,1598.586207  
2,2,3421.207237  
2,2,2886.462617  
2,2,2393.937037  
2,2,1605.525714  
2,2,1793.019685  
2,2,4954.982906  
2,2,2502.428571  
2,2,2164.493590  
2,2,2934.218563  
2,2,1728.097222  
2,2,3237.440000  
2,2,3133.787234  
2,2,1728.000000  
2,2,1736.261111  
2,2,7472.997500  
2,2,1727.610000  
2,2,13252.695946  
2,2,4596.480769  
2,2,2724.152381  
2,2,4238.228022  
2,2,2675.186813  
2,2,4333.275568  
2,2,2062.181818  
2,2,1758.078488  
2,2,2646.883333  
2,2,2047.497396  
2,2,4990.712838  
2,2,5034.076087  
2,2,7235.404762  
2,2,2728.011905

2,2,1707.365854  
2,2,2881.284091  
2,2,12931.948980  
2,2,2718.473684  
2,2,4798.671053  
2,2,4794.175000  
2,2,1587.656250  
2,2,1558.110465  
2,2,3003.036364  
2,2,4387.857143  
2,2,7623.353659  
2,2,8363.751412  
2,2,2433.462366  
2,2,38041.696203  
2,2,3473.372340  
2,2,3085.479167  
2,2,4019.446078  
2,2,3459.715000  
2,2,7331.105769  
2,2,13676.993902  
2,2,1685.311275  
2,2,1532.470930  
2,2,3087.428571  
2,2,4503.009804  
2,2,4541.803922  
2,2,2903.255208  
2,2,3886.405556  
2,2,11858.558824  
2,2,2814.489796  
2,2,2222.459375  
2,2,2424.729167  
2,2,14879.939024  
2,2,2147.643590  
2,2,1547.945122  
2,2,1541.750000  
2,2,6641.798077  
2,2,2438.086310  
2,2,3846.312500  
2,2,4019.354592  
2,2,4169.406250  
2,2,3455.782609  
2,2,2175.130435  
2,2,2584.666667  
2,2,4731.090909  
2,2,1668.230769  
2,2,1961.671429  
2,2,2711.615132  
2,2,4002.677500  
2,2,5127.680233  
2,2,3317.285714  
2,2,2658.583333  
2,2,2913.649457  
2,2,2144.739583  
2,2,1693.058673  
2,2,3672.829114  
2,2,2890.139706  
2,2,3314.842105  
2,2,1628.014706  
2,2,1835.677632  
2,2,7174.224057  
2,2,4234.978723  
2,2,5662.750000  
2,2,6985.770270  
2,2,3324.109375  
2,2,2314.988636  
2,2,2024.117021

2,2,5092.567500  
2,2,4316.377604  
2,2,2401.763158  
2,2,1931.069149  
2,2,2652.914773  
2,2,2291.133333  
2,2,6760.191489  
2,2,1782.762500  
2,2,8060.789474  
2,2,3979.134146  
2,2,4846.223464  
2,2,3707.962264  
2,2,1545.562500  
2,2,2304.634615  
2,2,2280.750000  
2,2,13434.822222  
2,2,4631.513514  
2,2,4121.245399  
2,2,5818.538462  
2,2,2046.443878  
2,2,2471.016667  
2,2,3225.016667  
2,2,1797.808511  
2,2,4211.068750  
2,2,2551.500000  
2,2,2057.609756  
2,2,1919.389474  
2,2,2342.955128  
2,2,4340.763514  
2,2,6497.095238  
2,2,5017.828125  
2,2,2223.866071  
2,2,3786.333333  
2,2,8214.031746  
2,2,2742.096774  
2,2,3597.571429  
2,2,2591.149390  
2,2,2049.899329  
2,2,3542.755102  
2,2,3125.000000  
2,2,5351.142077  
2,2,1849.125000  
2,2,1892.039352  
2,2,21705.416256  
2,2,6502.510638  
2,2,2442.267442  
2,2,2348.811321  
2,2,2223.296875  
2,2,12408.208333  
2,2,1964.292553  
2,2,5858.933333  
2,2,6068.232759  
2,2,8003.305233  
2,2,1765.520000  
2,2,2765.021472  
2,2,5325.424658  
2,2,1821.295455  
2,2,2876.000000  
2,2,1987.480769  
2,2,2722.175355  
2,2,4600.850299  
2,2,1823.500000  
2,2,2865.848837  
2,2,1560.034091  
2,2,2433.979592  
2,2,2860.542857

2,2,13773.687500  
2,2,7940.978723  
2,2,1898.515625  
2,2,2325.283920  
2,2,6214.597015  
2,2,1615.017442  
2,2,13423.117925  
2,2,3014.469512  
2,2,4384.082237  
2,2,2837.509615  
2,2,1750.000000  
2,2,6628.511364  
2,2,1605.222826  
2,2,4021.412500  
2,2,3581.087500  
2,2,3246.527778  
2,2,2868.306818  
2,2,11114.442857  
2,2,2277.630000  
2,2,1528.009146  
2,2,3387.319767  
2,2,1517.898026  
2,2,2161.234694  
2,2,26518.809091  
2,2,2023.191011  
2,2,2000.572917  
2,2,3032.215686  
2,2,4096.705714  
2,2,3308.122340  
2,2,1722.628289  
2,2,2265.350000  
2,2,7112.805556  
2,2,1831.547619  
2,2,2698.534091  
2,2,3727.184615  
2,2,4242.269886  
2,2,3245.773256  
2,2,8130.469697  
2,2,3651.786765  
2,2,4801.371951  
2,2,1690.328947  
2,2,5371.750000  
2,2,1664.000000  
2,2,1758.050532  
2,2,2594.195652  
2,2,9878.134615  
2,2,7258.160000  
2,2,17078.692500  
2,2,1830.181818  
2,2,1954.187500  
2,2,4557.441176  
2,2,3888.937500  
2,2,3379.061224  
2,2,2132.810056  
2,2,4570.914286  
2,2,1544.420765  
2,2,1548.053191  
2,2,1548.079470  
2,2,7627.254980  
2,2,5765.852459  
2,2,1852.615385  
2,2,8289.591837  
2,2,16658.035326  
2,2,4175.395349  
2,2,7971.531250  
2,2,3291.507353

2,2,1790.784091  
2,2,14245.677778  
2,2,2213.844444  
2,2,6126.500000  
2,2,1845.701987  
2,2,10618.705128  
2,2,1548.125749  
2,2,2644.049020  
2,2,3602.382075  
2,2,4163.287234  
2,2,2045.769231  
2,2,3299.488372  
2,2,2319.238372  
2,2,2454.807692  
2,2,1512.000000  
2,2,2712.911932  
2,2,2631.105769  
2,2,3874.755556  
2,2,9203.275862  
2,2,3772.244048  
2,2,3470.951031  
2,2,2959.785714  
2,2,2279.726415  
2,2,1522.663265  
2,2,5224.151741  
2,2,3037.286585  
2,2,1609.838816  
2,2,2112.509375  
2,2,1901.625000  
2,2,1792.786517  
2,2,2731.962500  
2,2,4568.046875  
2,2,1621.273684  
2,2,2006.407895  
2,2,1930.843750  
2,2,4862.905556  
2,2,1960.173913  
2,2,4903.508333  
2,2,4322.043478  
2,2,1713.968750  
2,2,2755.975000  
2,2,4081.023256  
2,2,3047.896739  
2,2,3516.074324  
2,2,1985.049342  
2,2,5066.264706  
2,2,4144.061224  
2,2,5201.500000  
2,2,2043.075000  
2,2,1728.775568  
2,2,4072.572222  
2,2,1501.947917  
2,2,5996.559211  
2,2,2524.258152  
2,2,1596.250000  
2,2,2891.680000  
2,2,1903.726994  
2,2,1970.966887  
2,2,3344.452381  
2,2,3123.467066  
2,2,1732.800000  
2,2,2732.074405  
2,2,3646.396341  
2,2,6188.279412  
2,2,2549.311828  
2,2,1842.862069

2,2,2262.339674  
2,2,1885.851852  
2,2,9195.117647  
2,2,1931.875000  
2,2,15874.227273  
2,2,4230.966146  
2,2,4765.833333  
2,2,8413.000000  
2,2,2911.989796  
2,2,2418.102041  
2,2,1708.125000  
2,2,2246.756944  
2,2,1848.711806  
2,2,3831.986842  
2,2,2853.290698  
2,2,2506.490066  
2,2,8301.872685  
2,2,1794.358553  
2,2,1742.666667  
2,2,3977.088889  
2,2,5570.709135  
2,2,2276.051282  
2,2,2043.367347  
2,2,2021.000000  
2,2,2233.530405  
2,2,2508.775000  
2,2,1617.542857  
2,2,6736.456250  
2,2,2581.727273  
2,2,2397.068966  
2,2,2332.073171  
2,2,1657.401961  
2,2,11676.715164  
2,2,1851.325000  
2,2,2693.805556  
2,2,15793.521739  
2,2,1800.699387  
2,2,5644.222222  
2,2,5461.396226  
2,2,1894.968750  
2,2,4976.000000  
2,2,2169.387255  
2,2,2589.926136  
2,2,4161.567500  
2,2,2857.215686  
2,2,7038.789216  
2,2,1813.527027  
2,2,2144.500000  
2,2,3518.416667  
2,2,3426.484848  
2,2,1778.569444  
2,2,1639.254717  
2,2,8406.842105  
2,2,13863.489362  
2,2,1561.375000  
2,2,2772.900641  
2,2,1570.388021  
2,2,13848.713636  
2,2,5662.080357  
2,2,4195.781250  
2,2,6550.952500  
2,2,4555.805714  
2,2,6911.863281  
2,2,2769.647727  
2,2,2199.227749  
2,2,1665.511628

2,2,8664.466667  
2,2,1556.869565  
2,2,4784.583333  
2,2,6157.085106  
2,2,2751.515625  
2,2,2623.571429  
2,2,3522.031250  
2,2,1520.947500  
2,2,2462.825000  
2,2,5522.061224  
2,2,2835.808511  
2,2,2788.230769  
2,2,8370.574803  
2,2,6484.275510  
2,2,3552.288571  
2,2,2376.937500  
2,2,1698.607143  
2,2,2026.318182  
2,2,3746.003049  
2,2,4296.514368  
2,2,1752.500000  
2,2,8189.275510  
2,2,9489.524390  
2,2,13756.630952  
2,2,2408.200000  
2,2,4240.425532  
2,2,3989.781977  
2,2,2037.561111  
2,2,2149.195455  
2,2,2622.250000  
2,2,3597.789352  
2,2,3034.000000  
2,2,1925.784810  
2,2,4899.107143  
2,2,2904.792683  
2,2,2270.484536  
2,2,5486.798077  
2,2,3824.877551  
2,2,2703.633333  
2,2,2616.595930  
2,2,4165.209821  
2,2,7847.426630  
2,2,6533.189189  
2,2,4984.952381  
2,2,2057.739583  
2,2,3059.465000  
2,2,3641.130952  
2,2,1841.141447  
2,2,2086.250000  
2,2,9114.375000  
2,2,1594.343750  
2,2,1978.411765  
2,2,10317.058333  
2,2,1793.375000  
2,2,5044.764901  
2,2,7206.365385  
2,2,3838.709184  
2,2,2876.649457  
2,2,2130.678125  
2,2,3095.000000  
2,2,3807.428977  
2,2,1853.350000  
2,2,1780.696875  
2,2,6826.086957  
2,2,3336.114583  
2,2,4079.098684

2,2,2676.055556  
2,2,1721.067568  
2,2,4466.386364  
2,2,2997.647059  
2,2,5149.258721  
2,2,1514.461538  
2,2,4268.918605  
2,2,4191.281250  
2,2,4356.020349  
2,2,2287.127778  
2,2,4212.250000  
2,2,1703.487179  
2,2,3098.403125  
2,2,2045.622340  
2,2,1717.029762  
2,2,1704.480000  
2,2,2148.600000  
2,2,1610.477273  
2,2,11542.522422  
2,2,2944.850000  
2,2,2109.423077  
2,2,4459.836538  
2,2,1513.425000  
2,2,2217.067308  
2,2,2371.627451  
2,2,1645.620690  
2,2,6624.605405  
2,2,7494.183036  
2,2,2325.394886  
2,2,9831.270270  
2,2,2107.009036  
2,2,6003.800926  
2,2,3678.750000  
2,2,7701.449324  
2,2,7761.806604  
2,2,15001.090909  
2,2,4845.968750  
2,2,2477.293750  
2,2,3204.744048  
2,2,2615.774390  
2,2,1777.890052  
2,2,7839.914286  
2,2,2186.639810  
2,2,10266.366071  
2,2,4345.882353  
2,2,2420.898810  
2,2,6300.921053  
2,2,3065.687500  
2,2,4001.581395  
2,2,2417.977679  
2,2,4885.817708  
2,2,2228.250000  
2,2,3812.790541  
2,2,5915.676829  
2,2,8832.118534  
2,2,3984.475000  
2,2,1740.884868  
2,2,2395.895833  
2,2,12083.867647  
2,2,6694.333333  
2,2,2279.472222  
2,2,7045.470930  
2,2,1745.669118  
2,2,3673.043478  
2,2,1836.978125  
2,2,3332.000000

2,2,5250.356383  
2,2,3146.128205  
2,2,2706.860465  
2,2,1831.594388  
2,2,1525.740196  
2,2,2727.869565  
2,2,5036.400000  
2,2,2290.415541  
2,2,2757.314103  
2,2,2096.187500  
2,2,8296.470339  
2,2,4130.750000  
2,2,1832.518750  
2,2,2101.988889  
2,2,3867.818182  
2,2,10138.976190  
2,2,2419.305804  
2,2,4780.365385  
2,2,2345.265306  
2,2,3603.250000  
2,2,1998.292683  
2,2,7484.250000  
2,2,7482.284091  
2,2,26310.245614  
2,2,6612.708333  
2,2,3520.309211  
2,2,1900.735119  
2,2,7892.577869  
2,2,3996.997500  
2,2,12477.182692  
2,2,2208.756098  
2,2,7057.075000  
2,2,3146.961957  
2,2,2266.472500  
2,2,9802.681818  
2,2,5232.500000  
2,2,2422.322674  
2,2,1627.652439  
2,2,3138.652174  
2,2,7890.191860  
2,2,3108.562500  
2,2,1586.997449  
2,2,15718.598837  
2,2,2317.047414  
2,2,1711.965278  
2,2,4228.796196  
2,2,2425.718750  
2,2,3457.941860  
2,2,2371.793919  
2,2,3375.795455  
2,2,2156.431250  
2,2,1743.616071  
2,2,1684.817935  
2,2,3679.156250  
2,2,1844.468750  
2,2,1750.661765  
2,2,13352.566176  
2,2,1644.582386  
2,2,3188.324324  
2,2,1806.275510  
2,2,2159.710227  
2,2,1614.207317  
2,2,2033.250000  
2,2,5394.287500  
2,2,3009.944444  
2,2,2414.535156

2,2,3479.042453  
2,2,1992.212766  
2,2,2655.541667  
2,2,1983.697368  
2,2,2760.250000  
2,2,2534.670455  
2,2,2656.255814  
2,2,1721.302083  
2,2,30038.000000  
2,2,1504.128571  
2,2,5538.776596  
2,2,2778.360714  
2,2,5916.530093  
2,2,4618.051282  
2,2,5690.650000  
2,2,3211.402778  
2,2,2569.115132  
2,2,2730.215909  
2,2,2709.245283  
2,2,4307.395000  
2,2,3348.414894  
2,2,5268.859694  
2,2,1633.425000  
2,2,4275.006410  
2,2,5746.153846  
2,2,7190.463816  
2,2,7743.586735  
2,2,1607.164062  
2,2,1976.145000  
2,2,2015.000000  
2,2,1929.256944  
2,2,2424.912921  
2,2,2525.045918  
2,2,9575.715909  
2,2,2172.081522  
2,2,7071.709091  
2,2,2718.364286  
2,2,5580.779412  
2,2,5312.835526  
2,2,2036.675000  
2,2,4492.375000  
2,2,1535.426136  
2,2,7215.144608  
2,2,12752.370166  
2,2,8200.048295  
2,2,4664.715116  
2,2,10180.857955  
2,2,7848.500000  
2,2,5212.809524  
2,2,20782.445000  
2,2,5100.724138  
2,2,2097.228346  
2,2,6950.143617  
2,2,1971.968750  
2,2,8964.059783  
2,2,3655.076923  
2,2,1632.840625  
2,2,4156.435897  
2,2,3811.961111  
2,2,1628.786585  
2,2,8527.437500  
2,2,1676.048851  
2,2,2218.708333  
2,2,1803.950581  
2,2,2041.982143  
2,2,3486.744898

2,2,3425.090278  
2,2,1572.646341  
2,2,3653.508380  
2,2,4076.174863  
2,2,2505.312500  
2,2,3296.818436  
2,2,1994.553571  
2,2,1688.519022  
2,2,4096.905000  
2,2,3257.052885  
2,2,2168.333333  
2,2,2132.988235  
2,2,2491.673913  
2,2,4822.594907  
2,2,2315.611111  
2,2,4447.704545  
2,2,2309.535354  
2,2,2381.107500  
2,2,3662.979592  
2,2,2061.154545  
2,2,2992.854651  
2,2,1815.185484  
2,2,3996.028646  
2,2,1666.955556  
2,2,4557.133929  
2,2,2525.849057  
2,2,2778.469512  
2,2,3206.468085  
2,2,3989.463816  
2,2,1502.243421  
2,2,8016.807692  
2,2,1939.356707  
2,2,3577.793605  
2,2,1732.644022  
2,2,10042.663043  
2,2,6121.492647  
2,2,4492.764706  
2,2,1560.096875  
2,2,10275.041237  
2,2,5620.288462  
2,2,3575.059172  
2,2,2960.786624  
2,2,2652.326531  
2,2,1930.176471  
2,2,2524.516304  
2,2,3973.280556  
2,2,6426.810204  
2,2,4686.339572  
2,2,1718.000000  
2,2,3978.560976  
2,2,5705.048544  
2,2,2473.702381  
2,2,7426.953488  
2,2,2474.832418  
2,2,2749.893617  
2,2,4204.351724  
2,2,3974.640719  
2,2,9536.179167  
2,2,3285.500000  
2,2,4822.732143  
2,2,7842.585987  
2,2,4169.731707  
2,2,4277.114094  
2,2,4323.605978  
2,2,4921.513158  
2,2,2835.780488

2,2,1892.672414  
2,2,2151.577206  
2,2,6394.160256  
2,2,2523.520833  
2,2,2092.600000  
2,2,4153.214286  
2,2,1526.656250  
2,2,1797.767606  
2,2,6828.193548  
2,2,3892.974432  
2,2,4830.890957  
2,2,2875.471292  
2,2,5517.471154  
2,2,3864.084302  
2,2,8305.235294  
2,2,3996.750000  
2,2,3040.643229  
2,2,1819.533333  
2,2,1765.955882  
2,2,2191.453125  
2,2,3869.531250  
2,2,10863.763587  
2,2,12036.017442  
2,2,4731.951923  
2,2,2314.460526  
2,2,3872.085784  
2,2,2085.549296  
2,2,1946.937500  
2,2,2081.812500  
2,2,18473.056452  
2,2,3321.092391  
2,2,2385.363372  
2,2,1851.261905  
2,2,1630.116279  
2,2,2368.790698  
2,2,1537.736842  
2,2,7546.607558  
2,2,4220.304878  
2,2,2469.407895  
2,2,3663.673077  
2,2,4207.990654  
2,2,3082.111111  
2,2,2683.861650  
2,2,1920.179348  
2,2,7361.215640  
2,2,3850.192308  
2,2,2484.154412  
2,2,2936.727749  
2,2,2944.805556  
2,2,2274.778443  
2,2,5509.813830  
2,2,1659.111111  
2,2,1758.887097  
2,2,3199.108108  
2,2,2030.444444  
2,2,4828.795455  
2,2,2637.226804  
2,2,2238.221154  
2,2,2323.972973  
2,2,2198.392857  
2,2,3664.640625  
2,2,2819.812500  
2,2,2976.948529  
2,2,1600.276042  
2,2,1615.652174  
2,2,1939.555556

2,2,6038.031977  
2,2,2598.020833  
2,2,4897.915254  
2,2,5248.388889  
2,2,11756.432065  
2,2,6440.659091  
2,2,6542.125000  
2,2,1538.058824  
2,2,2007.236413  
2,2,4392.325581  
2,2,2077.663462  
2,2,1502.266304  
2,2,6095.392500  
2,2,2134.369681  
2,2,3280.636364  
2,2,3374.467391  
2,2,1617.507353  
2,2,8808.500000  
2,2,4182.076220  
2,2,2964.735294  
2,2,2314.013514  
2,2,2471.357143  
2,2,6396.250000  
2,2,4131.691919  
2,2,2791.535714  
2,2,4088.277778  
2,2,3812.671196  
2,2,2287.851190  
2,2,1709.801724  
2,2,18517.931373  
2,2,5465.927083  
2,2,1641.075000  
2,2,7218.324324  
2,2,5871.054054  
2,2,4826.299479  
2,2,10784.285714  
2,2,1850.115789  
2,2,5119.490798  
2,2,7982.317647  
2,2,2817.525000  
2,2,2656.814570  
2,2,2032.222826  
2,2,2455.090686  
2,2,1525.303571  
2,2,2562.250000  
2,2,2995.793103  
2,2,3386.167614  
2,2,2206.666667  
2,2,1524.853723  
2,2,3680.513158  
2,2,5614.612500  
2,2,3498.119565  
2,2,4075.947500  
2,2,4024.687500  
2,2,4035.706522  
2,2,3935.460227  
2,2,7903.026316  
2,2,11439.875000  
2,2,4083.095455  
2,2,3636.300000  
2,2,3284.643275  
2,2,6454.272500  
2,2,2857.153846  
2,2,1595.510135  
2,2,1588.882813  
2,2,1517.983553

2,2,6713.178571  
2,2,1966.148936  
2,2,3607.961538  
2,2,3726.201087  
2,2,4466.826923  
2,2,1826.138158  
2,2,5554.391204  
2,2,2680.166667  
2,2,5475.451531  
2,2,2410.406250  
2,2,2192.453488  
2,2,1532.258333  
2,2,3289.040094  
2,2,1814.826389  
2,2,1712.847222  
2,2,7730.753304  
2,2,4361.019802  
2,2,3238.198980  
2,2,3585.071918  
2,2,4057.017157  
2,2,76737.756410  
2,2,1767.203704  
2,2,5706.182292  
2,2,1669.416667  
2,2,2211.331731  
2,2,3302.741848  
2,2,1823.173913  
2,2,2302.388889  
2,2,1751.892857  
2,2,3746.297872  
2,2,1816.317308  
2,2,13127.971154  
2,2,2238.303571  
2,2,5538.375000  
2,2,1914.953488  
2,2,2181.583333  
2,2,1622.135135  
2,2,5192.714286  
2,2,2149.782609  
2,2,3968.988372  
2,2,2065.000000  
2,2,6501.891304  
2,2,5314.218750  
2,2,1754.320000  
2,2,4231.641304  
2,2,3946.565868  
2,2,2791.859375  
2,2,2790.804878  
2,2,7821.808824  
2,2,5914.125000  
2,2,8737.193182  
2,2,3804.385000  
2,2,1826.731771  
2,2,2230.913793  
2,2,1512.333333  
2,2,3473.326923  
2,2,5574.250000  
2,2,3068.109756  
2,2,2419.494444  
2,2,2416.394737  
2,2,2198.875000  
2,2,3694.544118  
2,2,3371.648438  
2,2,3145.832386  
2,2,4409.081818  
2,2,4716.500000

2,2,5634.305936  
2,2,2499.673611  
2,2,2101.395833  
2,2,1794.116379  
2,2,2695.979545  
2,2,3913.618750  
2,2,3037.360465  
2,2,9174.556122  
2,2,10554.949275  
2,2,2297.025641  
2,2,4547.282486  
2,2,1892.664634  
2,2,1957.514970  
2,2,6338.952128  
2,2,4169.633333  
2,2,3971.389706  
2,2,1499.135135  
2,2,1530.651163  
2,2,8207.741071  
2,2,1878.875000  
2,2,8470.704188  
2,2,7778.717949  
2,2,1658.521277  
2,2,2665.433962  
2,2,7872.397059  
2,2,4699.096354  
2,2,1614.795455  
2,2,1776.585366  
2,2,1837.875000  
2,2,7842.730978  
2,2,2076.390306  
2,2,4314.775568  
2,2,4520.250000  
2,2,1979.750000  
2,2,2136.152174  
2,2,1646.625000  
2,2,1786.934783  
2,2,2112.052326  
2,2,5924.331522  
2,2,18301.887500  
2,2,4418.955556  
2,2,3298.550000  
2,2,2645.675325  
2,2,6043.450000  
2,2,4175.535885  
2,2,2389.550000  
2,2,5521.550336  
2,2,3078.602871  
2,2,1766.031250  
2,2,2204.375000  
2,2,3229.041667  
2,2,6936.546196  
2,2,1860.136076  
2,2,2284.520468  
2,2,8534.656489  
2,2,4505.599432  
2,2,2257.409091  
2,2,2536.370000  
2,2,2152.487179  
2,2,4320.509375  
2,2,2486.807927  
2,2,1684.284722  
2,2,2594.526316  
2,2,3616.077778  
2,2,1534.545000  
2,2,4600.784574

2,2,3574.850000  
2,2,3565.381944  
2,2,3371.766234  
2,2,2819.929032  
2,2,4908.468085  
2,2,12030.217262  
2,2,2171.121951  
2,2,4551.500000  
2,2,12100.729730  
2,2,20813.263889  
2,2,1968.894737  
2,2,7765.037037  
2,2,4571.273196  
2,2,1818.368421  
2,2,5519.315000  
2,2,3737.608974  
2,2,3898.918367  
2,2,6618.989796  
2,2,5936.931818  
2,2,21858.717391  
2,2,1764.695000  
2,2,3399.842365  
2,2,6563.529851  
2,2,2835.147727  
2,2,16819.617424  
2,2,2596.375000  
2,2,5095.306977  
2,2,2447.552632  
2,2,3547.736842  
2,2,3894.750000  
2,2,3733.843085  
2,2,2329.840909  
2,2,4333.250000  
2,2,3193.005952  
2,2,1749.866071  
2,2,43713.735294  
2,2,5174.385965  
2,2,2196.090452  
2,2,1868.083333  
2,2,1790.833333  
2,2,1681.493750  
2,2,3055.312500  
2,2,2049.500000  
2,2,4426.489510  
2,2,6235.153846  
2,2,9820.314732  
2,2,3215.198171  
2,2,5349.087209  
2,2,16042.238971  
2,2,1615.183673  
2,2,1673.118243  
2,2,1712.420455  
2,2,1739.812500  
2,2,2158.135135  
2,2,2333.644444  
2,2,5122.753378  
2,2,2939.833333  
2,2,5417.236364  
2,2,3066.196203  
2,2,2230.969388  
2,2,8769.776316  
2,2,5336.250000  
2,2,2196.166667  
2,2,2766.085227  
2,2,1731.712500  
2,2,3030.250000

2,2,2980.806283  
2,2,3498.074286  
2,2,2643.778409  
2,2,7733.312500  
2,2,1549.955497  
2,2,2635.205128  
2,2,2688.307692  
2,2,10879.180233  
2,2,2235.410256  
2,2,2292.371429  
2,2,2997.609375  
2,2,1519.908784  
2,2,2864.166667  
2,2,5896.250000  
2,2,1919.532051  
2,2,1936.675676  
2,2,4260.670918  
2,2,22605.132812  
2,2,2560.909884  
2,2,3290.891667  
2,2,8557.515957  
2,2,2278.072727  
2,2,3863.944767  
2,2,2470.641509  
2,2,1691.398256  
2,2,5621.794872  
2,2,2486.300000  
2,2,7201.089623  
2,2,7147.250000  
2,2,3617.250000  
2,2,3230.961538  
2,2,6595.519886  
2,2,1639.545213  
2,2,4626.279762  
2,2,5222.267857  
2,2,5597.637195  
2,2,2657.210526  
2,2,5187.782857  
2,2,1508.267857  
2,2,2222.850711  
2,2,4361.448980  
2,2,4401.604651  
2,2,1511.400000  
2,2,5277.877451  
2,2,1940.380102  
2,2,5046.240196  
2,2,1635.090909  
2,2,1962.076389  
2,2,2880.263158  
2,2,2808.333333  
2,2,2631.461957  
2,2,2472.172297  
2,2,4397.130000  
2,2,2373.164634  
2,2,2132.098958  
2,2,5086.607500  
2,2,5228.978723  
2,2,2956.760417  
2,2,1915.380952  
2,2,1639.585106  
2,2,2382.875000  
2,2,1902.250000  
2,2,11676.484375  
2,2,2436.815909  
2,2,2525.854167  
2,2,2780.447222

2,2,12638.570755  
2,2,2937.364706  
2,2,2340.936073  
2,2,3798.450000  
2,2,2768.103774  
2,2,5777.107558  
2,2,8052.925170  
2,2,4239.846154  
2,2,5713.328947  
2,2,1582.523810  
2,2,2281.738636  
2,2,20363.170732  
2,2,8044.902778  
2,2,6982.914894  
2,2,4122.302632  
2,2,2466.994118  
2,2,3755.729167  
2,2,3696.677632  
2,2,2397.586207  
2,2,1695.353261  
2,2,3649.823864  
2,2,1864.701389  
2,2,4492.011905  
2,2,8393.731250  
2,2,1739.415698  
2,2,6447.627778  
2,2,11516.480392  
2,2,2099.394231  
2,2,4517.014706  
2,2,2636.348837  
2,2,2755.752577  
2,2,5311.875000  
2,2,1653.525000  
2,2,4876.552273  
2,2,2685.070313  
2,2,2214.215686  
2,2,19763.035714  
2,2,2634.944444  
2,2,1855.830729  
2,2,14095.333333  
2,2,1537.085714  
2,2,3184.666667  
2,2,4570.641509  
2,2,3723.872449  
2,2,4862.260204  
2,2,3488.890244  
2,2,2905.802395  
2,2,1835.000000  
2,2,2663.116667  
2,2,2001.857616  
2,2,4150.097826  
2,2,1729.776074  
2,2,3108.226562  
2,2,2305.202128  
2,2,6552.000000  
2,2,2927.176471  
2,2,1597.642857  
2,2,1594.785714  
2,2,2477.437838  
2,2,12295.394737  
2,2,2481.010695  
2,2,2347.908784  
2,2,4397.625000  
2,2,3182.500000  
2,2,4852.518293  
2,2,4572.276471

2,2,4348.872093  
2,2,1577.946023  
2,2,1558.882353  
2,2,3521.869318  
2,2,4083.621951  
2,2,4665.972561  
2,2,7699.235294  
2,2,1869.526316  
2,2,2203.972826  
2,2,1898.595109  
2,2,4002.121951  
2,2,2611.581395  
2,2,2777.375000  
2,2,5509.580357  
2,2,1543.739796  
2,2,3281.168605  
2,2,3580.391827  
2,2,2085.142500  
2,2,2209.729167  
2,2,16067.539474  
2,2,1675.743421  
2,2,3730.914894  
2,2,1752.176630  
2,2,5968.352410  
2,2,2048.363636  
2,2,3456.370000  
2,2,2861.000000  
2,2,2559.096774  
2,2,37133.068878  
2,2,3721.538462  
2,2,2138.332317  
2,2,1562.636364  
2,2,1931.519231  
2,2,2592.693878  
2,2,2949.211806  
2,2,3323.942308  
2,2,2538.107143  
2,2,5565.312500  
2,2,2266.510638  
2,2,9951.927273  
2,2,7634.202128  
2,2,2121.209375  
2,2,3152.559783  
2,2,4095.443182  
2,2,4999.992806  
2,2,3802.634146  
2,2,2421.328947  
2,2,1640.142157  
2,2,2757.350446  
2,2,2194.686275  
2,2,4515.015306  
2,2,7296.379310  
2,2,4134.392857  
2,2,7432.192982  
2,2,4621.735294  
2,2,8763.370283  
2,2,2747.831522  
2,2,1921.000000  
2,2,4005.060484  
2,2,4154.584906  
2,2,1705.625000  
2,2,2080.309659  
2,2,2544.900000  
2,2,1857.315789  
2,2,3580.204545  
2,2,3074.761905

2,2,1837.718750  
2,2,1774.810976  
2,2,2329.843750  
2,2,1862.071429  
2,2,3022.788462  
2,2,6393.719212  
2,2,3897.968085  
2,2,5225.371795  
2,2,4917.425532  
2,2,4156.852941  
2,2,1773.259615  
2,2,3935.261905  
2,2,3808.607955  
2,2,2308.048295  
2,2,2194.825000  
2,2,1973.686170  
2,2,3577.684783  
2,2,5663.352941  
2,2,4765.446809  
2,2,1887.162304  
2,2,3992.305000  
2,2,4571.339286  
2,2,2843.222222  
2,2,4071.981818  
2,2,2879.323077  
2,2,1551.803571  
2,2,5003.222222  
2,2,2128.500000  
2,2,2082.483333  
2,2,2471.207386  
2,2,3145.269737  
2,2,6021.226190  
2,2,8395.395161  
2,2,1773.458333  
2,2,3420.681818  
2,2,9430.750000  
2,2,3399.919355  
2,2,1544.500000  
2,2,2379.133333  
2,2,10486.799528  
2,2,3082.892857  
2,2,2063.595238  
2,2,2582.304054  
2,2,1673.783333  
2,2,2284.206522  
2,2,3948.680851  
2,2,5808.468750  
2,2,3452.566667  
2,2,2047.006579  
2,2,4401.816754  
2,2,2421.541872  
2,2,2142.412791  
2,2,2949.696078  
2,2,2392.500000  
2,2,1716.865000  
2,2,4895.675000  
2,2,6243.484375  
2,2,2057.580556  
2,2,2198.926829  
2,2,1747.272727  
2,2,1723.800000  
2,2,1559.473684  
2,2,1685.443966  
2,2,3762.953488  
2,2,5711.166667  
2,2,4113.301020

2,2,15731.136364  
2,2,1947.878378  
2,2,5057.101064  
2,2,2255.222222  
2,2,3674.297872  
2,2,1929.298742  
2,2,7806.936170  
2,2,1690.094118  
2,2,2850.930233  
2,2,2945.885000  
2,2,3380.020270  
2,2,4526.187500  
2,2,3218.408867  
2,2,1602.750000  
2,2,4463.006410  
2,2,6759.237500  
2,2,2935.767157  
2,2,4992.363636  
2,2,4006.135135  
2,2,1545.353333  
2,2,4017.454545  
2,2,1907.850000  
2,2,1636.755435  
2,2,2079.425000  
2,2,2410.000000  
2,2,2629.540816  
2,2,7321.044811  
2,2,4140.604651  
2,2,5221.789474  
2,2,5645.908537  
2,2,4275.084302  
2,2,8937.000000  
2,2,10911.357143  
2,2,1746.608696  
2,2,2156.673469  
2,2,2246.000000  
2,2,4441.431250  
2,2,1762.444444  
2,2,2802.037500  
2,2,3573.342949  
2,2,2875.534884  
2,2,2185.312500  
2,2,3691.216080  
2,2,2074.408537  
2,2,26295.418605  
2,2,4071.533654  
2,2,11563.191176  
2,2,2450.184211  
2,2,1699.225000  
2,2,6671.513514  
2,2,1653.000000  
2,2,2189.454545  
2,2,2460.795455  
2,2,3059.000000  
2,2,3132.063452  
2,2,2046.279070  
2,2,2638.308989  
2,2,2023.197674  
2,2,3179.875000  
2,2,2078.846875  
2,2,6724.217500  
2,2,3089.136628  
2,2,4520.592105  
2,2,4474.957317  
2,2,2462.266509  
2,2,2814.251397

2,2,1856.000000  
2,2,1678.864865  
2,2,2721.862245  
2,2,3432.102941  
2,2,3047.112821  
2,2,2172.125000  
2,2,4115.192982  
2,2,10230.777778  
2,2,2994.512500  
2,2,5269.897500  
2,2,1562.608696  
2,2,2118.600000  
2,2,2063.157895  
2,2,2323.677632  
2,2,3256.175532  
2,2,3914.930921  
2,2,4199.750000  
2,2,11050.534031  
2,2,2290.003497  
2,2,2563.145000  
2,2,3792.979167  
2,2,2660.174419  
2,2,2306.301829  
2,2,2490.326613  
2,2,12319.574468  
2,2,1638.664894  
2,2,1793.201220  
2,2,1840.455357  
2,2,2096.180556  
2,2,1626.600000  
2,2,15321.473684  
2,2,1751.269231  
2,2,1649.050000  
2,2,16388.000000  
2,2,6616.375000  
2,2,5705.481618  
2,2,4481.466667  
2,2,1613.815789  
2,2,1522.340000  
2,2,10763.320175  
2,2,2199.200000  
2,2,1678.487500  
2,2,2448.090909  
2,2,2978.650000  
2,2,1817.779762  
2,2,3724.625000  
2,2,2022.851351  
2,2,13063.960106  
2,2,2071.128205  
2,2,3899.934783  
2,2,1984.145833  
2,2,2252.506250  
2,2,1774.000000  
2,2,3038.801887  
2,2,2805.645833  
2,2,2088.040541  
2,2,11728.322222  
2,2,3472.175000  
2,2,4942.644886  
2,2,1543.470588  
2,2,1675.367021  
2,2,2568.173469  
2,2,2092.812950  
2,2,3170.051471  
2,2,2128.292683  
2,2,6803.423256

2,2,7391.020833  
2,2,5003.348684  
2,2,4189.000000  
2,2,6886.525000  
2,2,8832.875000  
2,2,2493.615385  
2,2,11172.385204  
2,2,21867.771341  
2,2,2825.363372  
2,2,1859.140306  
2,2,7449.000000  
2,2,3543.219444  
2,2,3454.130952  
2,2,2321.489796  
2,2,1511.512500  
2,2,1607.854730  
2,2,4592.344512  
2,2,3217.695652  
2,2,3003.986979  
2,2,1692.988095  
2,2,4458.184783  
2,2,8849.425676  
2,2,3352.029255  
2,2,5387.459302  
2,2,1509.531250  
2,2,2743.296569  
2,2,10582.695312  
2,2,2722.729469  
2,2,10703.036269  
2,2,2578.751220  
2,2,1721.266169  
2,2,1625.916667  
2,2,1649.085586  
2,2,5384.098958  
2,2,5253.144231  
2,2,2074.640704  
2,2,3384.413408  
2,2,1965.237805  
2,2,3007.497340  
2,2,2465.921875  
2,2,2556.440217  
2,2,4221.031250  
2,2,1620.593750  
2,2,5291.012019  
2,2,3749.429688  
2,2,5393.250000  
2,2,1547.516667  
2,2,6314.103125  
2,2,13680.128655  
2,2,2615.118557  
2,2,2267.545455  
2,2,2634.659722  
2,2,2501.100610  
2,2,5273.391304  
2,2,3076.405405  
2,2,7605.341912  
2,2,1617.146429  
2,2,1558.831754  
2,2,4761.338816  
2,2,2921.729167  
2,2,1986.884615  
2,2,4833.828947  
2,2,5147.024390  
2,2,3840.682692  
2,2,3889.718750  
2,2,1539.214286

2,2,3064.321429  
2,2,3192.073171  
2,2,4215.201923  
2,2,6834.740741  
2,2,10269.463636  
2,2,1527.918367  
2,2,1568.432432  
2,2,1855.492925  
2,2,2202.812500  
2,2,1542.180982  
2,2,1641.591837  
2,2,1901.150568  
2,2,1933.828947  
2,2,2256.250000  
2,2,2337.912162  
2,2,2836.731707  
2,2,6781.929348  
2,2,5154.920000  
2,2,5116.661638  
2,2,4137.816129  
2,2,7042.411765  
2,2,2711.607558  
2,2,3144.243590  
2,2,3966.393333  
2,2,2287.881579  
2,2,1584.425000  
2,2,2134.438953  
2,2,12486.309524  
2,2,2198.510870  
2,2,5297.781915  
2,2,7177.061224  
2,2,2053.186528  
2,2,1542.445087  
2,2,1777.857143  
2,2,7381.053125  
2,2,1837.229592  
2,2,3065.318182  
2,2,1681.833333  
2,2,3086.840580  
2,2,4129.383152  
2,2,3999.512821  
2,2,1854.880000  
2,2,5195.000000  
2,2,1816.421622  
2,2,3000.972458  
2,2,1712.356250  
2,2,1593.786585  
2,2,4518.132353  
2,2,2064.770833  
2,2,4731.020833  
2,2,2705.869565  
2,2,3512.918919  
2,2,1866.000000  
2,2,8152.551887  
2,2,3798.692308  
2,2,1861.642857  
2,2,2162.000000  
2,2,2319.611842  
2,2,1922.074468  
2,2,11787.648438  
2,2,1838.333333  
2,2,2652.550000  
2,2,5649.627500  
2,2,9825.949074  
2,2,2167.908333  
2,2,4457.775862

2,2,3672.139881  
2,2,5967.059211  
2,2,3509.586207  
2,2,4107.302326  
2,2,3124.827225  
2,2,3359.987500  
2,2,3871.828571  
2,2,1628.450000  
2,2,6327.550000  
2,2,10410.345455  
2,2,5523.288043  
2,2,7058.244444  
2,2,4337.431604  
2,2,2978.766827  
2,2,2466.250000  
2,2,9006.263158  
2,2,1970.185811  
2,2,23712.100000  
2,2,3882.365854  
2,2,4872.180851  
2,2,6792.353261  
2,2,1589.579268  
2,2,1590.285714  
2,2,3864.179348  
2,2,2301.937500  
2,2,10010.095588  
2,2,3095.100000  
2,2,8048.022222  
2,2,1506.637755  
2,2,3737.347222  
2,2,15249.527174  
2,2,2612.680328  
2,2,1837.351351  
2,2,6585.101093  
2,2,2193.212291  
2,2,4848.920000  
2,2,3215.691038  
2,2,2455.430851  
2,2,3422.774457  
2,2,12542.272727  
2,2,6311.761905  
2,2,2020.500000  
2,2,7756.403846  
2,2,1772.617021  
2,2,4463.087209  
2,2,5261.966518  
2,2,1920.731707  
2,2,3307.508929  
2,2,8915.864796  
2,2,5053.987013  
2,2,4855.000000  
2,2,2267.621053  
2,2,14332.348018  
2,2,4635.271277  
2,2,11843.748466  
2,2,25841.412903  
2,2,1578.796748  
2,2,2652.476974  
2,2,1509.937500  
2,2,2830.207317  
2,2,4326.468750  
2,2,3324.291667  
2,2,2366.981818  
2,2,1697.750000  
2,2,2326.097561  
2,2,5151.872340

2,2,4113.523649  
2,2,3341.600000  
2,2,3364.036364  
2,2,1619.137255  
2,2,7860.304688  
2,2,1630.835366  
2,2,2477.909091  
2,2,3529.878049  
2,2,2813.657051  
2,2,2119.566667  
2,2,2968.371951  
2,2,2587.416667  
2,2,4469.437500  
2,2,1544.738636  
2,2,3077.526042  
2,2,3226.604167  
2,2,5510.525735  
2,2,22881.615196  
2,2,2294.821023  
2,2,2267.798611  
2,2,5001.823864  
2,2,5574.474359  
2,2,24304.428030  
2,2,2498.687500  
2,2,1734.261792  
2,2,1721.520408  
2,2,2803.848214  
2,2,2487.481707  
2,2,2065.384615  
2,2,13015.279605  
2,2,12890.941176  
2,2,3007.167614  
2,2,8353.166667  
2,2,2488.045455  
2,2,1601.000000  
2,2,1811.267361  
2,2,2377.638889  
2,2,2182.478723  
2,2,1843.588235  
2,2,2900.481707  
2,2,1908.650735  
2,2,2349.365566  
2,2,3936.883721  
2,2,2222.669271  
2,2,2443.323370  
2,2,1989.833333  
2,2,2292.255319  
2,2,2914.398256  
2,2,2231.528409  
2,2,3648.100000  
2,2,2557.771739  
2,2,6093.625000  
2,2,2874.778125  
2,2,1923.475000  
2,2,2046.583333  
2,2,4164.013298  
2,2,5263.390625  
2,2,1885.659574  
2,2,4496.100000  
2,2,4161.166667  
2,2,1816.297297  
2,2,2069.078431  
2,2,2433.656250  
2,2,2761.016026  
2,2,1980.639286  
2,2,4947.632653

2,2,3074.828947  
2,2,1755.013514  
2,2,2413.057692  
2,2,1597.185976  
2,2,1575.564356  
2,2,3317.467949  
2,2,3782.615385  
2,2,2116.854167  
2,2,2864.948864  
2,2,3096.940625  
2,2,5208.216049  
2,2,1768.890625  
2,2,4502.443350  
2,2,2291.855330  
2,2,8541.381579  
2,2,1698.244444  
2,2,2964.437500  
2,2,1798.807692  
2,2,2949.280788  
2,2,4864.220126  
2,2,6886.659574  
2,2,1848.250000  
2,2,7317.000000  
2,2,1931.835366  
2,2,5044.311111  
2,2,3523.652439  
2,2,3169.437500  
2,2,5311.895349  
2,2,9380.892857  
2,2,3183.666667  
2,2,4493.687500  
2,2,4425.100000  
2,2,1927.000000  
2,2,3984.956633  
2,2,1867.412791  
2,2,1709.983333  
2,2,3810.000000  
2,2,2407.941176  
2,2,4279.330882  
2,2,2519.375000  
2,2,6788.295732  
2,2,1963.524390  
2,2,1777.625000  
2,2,4680.411111  
2,2,2012.450331  
2,2,2576.481132  
2,2,3742.500000  
2,2,4799.566489  
2,2,2460.210526  
2,2,5315.659091  
2,2,6040.750000  
2,2,4149.440217  
2,2,5928.272436  
2,2,3604.089623  
2,2,2877.663462  
2,2,2402.666667  
2,2,2846.468085  
2,2,2593.695364  
2,2,2205.371622  
2,2,1929.500000  
2,2,1809.802326  
2,2,2256.849057  
2,2,2359.800000  
2,2,6709.058140  
2,2,2089.055556  
2,2,2104.794118

2,2,4032.428125  
2,2,3334.676136  
2,2,1519.145833  
2,2,1513.162500  
2,2,1603.480769  
2,2,7372.537234  
2,2,4415.917614  
2,2,3731.965625  
2,2,1519.542683  
2,2,1982.663462  
2,2,3276.302632  
2,2,5179.988372  
2,2,1571.721875  
2,2,2863.500000  
2,2,2063.364130  
2,2,2544.125000  
2,2,2978.750000  
2,2,4836.500000  
2,2,2073.238426  
2,2,2939.561224  
2,2,2470.775000  
2,2,2951.459459  
2,2,4377.446809  
2,2,1669.019231  
2,2,5136.456522  
2,2,1785.551136  
2,2,5089.504630  
2,2,10627.574519  
2,2,6135.333333  
2,2,2832.244444  
2,2,8540.983333  
2,2,3120.382979  
2,2,8098.866228  
2,2,2505.817500  
2,2,2122.101351  
2,2,1874.885714  
2,2,2388.666667  
2,2,2403.250000  
2,2,8072.361702  
2,2,3853.902500  
2,2,3934.500000  
2,2,4419.346535  
2,2,1654.545455  
2,2,1933.848837  
2,2,3456.961538  
2,2,7785.651786  
2,2,1563.308989  
2,2,2356.903846  
2,2,2463.679641  
2,2,4541.376963  
2,2,1910.104167  
2,2,2552.975000  
2,2,2135.363636  
2,2,1637.208333  
2,2,4951.279412  
2,2,2731.529787  
2,2,5677.535714  
2,2,2234.857143  
2,2,1505.710526  
2,2,9241.436047  
2,2,9506.647727  
2,2,3466.663717  
2,2,5147.847826  
2,2,5808.042683  
2,2,1528.726974  
2,2,2969.835404

2,2,3677.767857  
2,2,3306.160194  
2,2,4206.637640  
2,2,2876.500000  
2,2,4501.411458  
2,2,3329.298507  
2,2,1555.829114  
2,2,3613.493421  
2,2,3851.611765  
2,2,6951.490338  
2,2,2047.290816  
2,2,6564.186508  
2,2,7807.627119  
2,2,10765.562500  
2,2,3778.106383  
2,2,5968.438830  
2,2,1860.857143  
2,2,1655.184211  
2,2,6955.662420  
2,2,3372.645833  
2,2,4314.297872  
2,2,1985.068750  
2,2,3050.937500  
2,2,2449.840278  
2,2,2234.750000  
2,2,3727.255952  
2,2,3309.789474  
2,2,6207.787234  
2,2,5027.390625  
2,2,3060.150000  
2,2,2376.466346  
2,2,4284.252907  
2,2,3402.614130  
2,2,1629.375000  
2,2,6716.002604  
2,2,3660.240385  
2,2,5286.000000  
2,2,9617.786538  
2,2,7479.692308  
2,2,2560.411765  
2,2,2644.000000  
2,2,7108.959052  
2,2,2952.521739  
2,2,9708.621622  
2,2,15802.209302  
2,2,8100.500000  
2,2,4123.288889  
2,2,2249.407895  
2,2,2270.108108  
2,2,3843.500000  
2,2,2539.665541  
2,2,2121.380597  
2,2,1694.073864  
2,2,2795.848485  
2,2,1970.557143  
2,2,2171.521739  
2,2,3957.141892  
2,2,6348.818182  
2,2,2541.636364  
2,2,2044.990000  
2,2,12803.203947  
2,2,9295.130597  
2,2,2191.322368  
2,2,2043.117647  
2,2,2088.854651  
2,2,9424.400000

2,2,2294.882979  
2,2,7998.451220  
2,2,1854.083333  
2,2,10085.961538  
2,2,6352.829082  
2,2,2389.137500  
2,2,2151.485465  
2,2,2750.487500  
2,2,6231.418605  
2,2,2878.095109  
2,2,4594.405556  
2,2,2940.083333  
2,2,1938.909274  
2,2,1693.306452  
2,2,2869.197368  
2,2,4071.494444  
2,2,26844.772727  
2,2,6294.395833  
2,2,4549.812500  
2,2,5010.385000  
2,2,5764.754902  
2,2,2653.981250  
2,2,14387.573661  
2,2,1588.959184  
2,2,1689.457237  
2,2,1522.780000  
2,2,20711.129032  
2,2,1812.745370  
2,2,2302.282051  
2,2,1749.866279  
2,2,1567.229730  
2,2,5829.666667  
2,2,1641.250000  
2,2,3098.795699  
2,2,7497.489899  
2,2,1926.806818  
2,2,1636.533537  
2,2,2839.353659  
2,2,1778.360248  
2,2,5846.847953  
2,2,2694.698171  
2,2,1635.892857  
2,2,3801.620192  
2,2,1662.750000  
2,2,1589.043478  
2,2,3509.586957  
2,2,6007.127193  
2,2,1817.533333  
2,2,2826.846154  
2,2,1633.012500  
2,2,4090.830000  
2,2,3503.569444  
2,2,3049.229167  
2,2,3249.493243  
2,2,7403.000000  
2,2,3857.821429  
2,2,2476.543478  
2,2,2282.691489  
2,2,6778.338068  
2,2,2415.875000  
2,2,3734.054054  
2,2,8895.867788  
2,2,1541.829268  
2,2,4864.150000  
2,2,7937.192708  
2,2,5868.125000

2,2,4922.730337  
2,2,2313.186916  
2,2,2112.943299  
2,2,2212.178571  
2,2,3078.354651  
2,2,2443.787234  
2,2,1787.300000  
2,2,2129.461957  
2,2,2133.520833  
2,2,5769.814815  
2,2,3479.839286  
2,2,2044.530516  
2,2,3096.670673  
2,2,3409.350610  
2,2,4211.918919  
2,2,16062.010776  
2,2,1781.351064  
2,2,2103.453125  
2,2,7951.489130  
2,2,3687.828488  
2,2,4009.021875  
2,2,34060.099490  
2,2,2972.265244  
2,2,2091.483696  
2,2,3677.320000  
2,2,1622.666667  
2,2,8043.447674  
2,2,3499.687500  
2,2,1579.227273  
2,2,2168.229167  
2,2,2776.775510  
2,2,2273.857143  
2,2,2640.983173  
2,2,2849.663462  
2,2,4201.937500  
2,2,2639.573276  
2,2,4735.844660  
2,2,1633.864583  
2,2,1893.232143  
2,2,2628.843049  
2,2,4389.478070  
2,2,1783.400000  
2,2,4759.833333  
2,2,10955.422170  
2,2,5071.316860  
2,2,9184.062500  
2,2,2037.507979  
2,2,4270.777778  
2,2,2093.982639  
2,2,3409.473214  
2,2,2544.250000  
2,2,1659.692308  
2,2,2772.062937  
2,2,15603.259259  
2,2,2215.163043  
2,2,2069.575000  
2,2,5728.438776  
2,2,5102.945455  
2,2,3180.914634  
2,2,2922.893519  
2,2,4187.343750  
2,2,1533.503205  
2,2,2820.925532  
2,2,3942.468750  
2,2,3110.774390  
2,2,1864.932432

2,2,2414.020270  
2,2,1735.127717  
2,2,1624.102041  
2,2,1912.102564  
2,2,2262.731061  
2,2,12978.805000  
2,2,1606.471591  
2,2,3096.794872  
2,2,4082.184375  
2,2,2115.133508  
2,2,2635.379310  
2,2,1977.877778  
2,2,13199.882353  
2,2,5199.666667  
2,2,2788.764706  
2,2,1811.399457  
2,2,4774.243590  
2,2,2069.000000  
2,2,3014.566176  
2,2,5214.139241  
2,2,1670.615578  
2,2,3435.211429  
2,2,1635.500000  
2,2,2032.000000  
2,2,1882.062500  
2,2,2431.312500  
2,2,11868.426230  
2,2,2207.840909  
2,2,5980.859375  
2,2,2337.994318  
2,2,2815.562500  
2,2,2622.443299  
2,2,2059.375000  
2,2,2407.968750  
2,2,1770.777778  
2,2,1927.347561  
2,2,2901.840426  
2,2,5767.812500  
2,2,1701.523810  
2,2,3554.270270  
2,2,2843.256944  
2,2,3979.729730  
2,2,4534.681818  
2,2,2617.000000  
2,2,1787.468023  
2,2,2512.520833  
2,2,3128.125000  
2,2,3569.689189  
2,2,3258.975000  
2,2,3320.702703  
2,2,7694.761364  
2,2,3980.143939  
2,2,1920.550781  
2,2,5096.125000  
2,2,2220.800000  
2,2,5062.162736  
2,2,3460.142857  
2,2,3438.358491  
2,2,2575.437500  
2,2,2216.142857  
2,2,2069.566667  
2,2,9449.181122  
2,2,2713.132143  
2,2,1610.932692  
2,2,5301.764706  
2,2,4110.775000

2,2,2942.541667  
2,2,2227.486111  
2,2,2266.369048  
2,2,2891.314394  
2,2,5410.229730  
2,2,4538.473262  
2,2,2687.632353  
2,2,3563.574468  
2,2,2364.189189  
2,2,2016.312500  
2,2,2576.994186  
2,2,1861.594595  
2,2,2513.969595  
2,2,5724.031250  
2,2,4248.472826  
2,2,1652.343023  
2,2,2701.171875  
2,2,2882.508380  
2,2,3203.527174  
2,2,3768.054348  
2,2,5479.109756  
2,2,2336.340909  
2,2,2822.078125  
2,2,19089.352273  
2,2,3005.250000  
2,2,3266.666667  
2,2,3242.314024  
2,2,1750.256757  
2,2,3463.804348  
2,2,4260.848039  
2,2,1699.894737  
2,2,12990.165000  
2,2,2663.464286  
2,2,8079.384615  
2,2,4063.055288  
2,2,1641.500000  
2,2,1672.956835  
2,2,2303.444444  
2,2,1522.423780  
2,2,2015.895270  
2,2,1740.628049  
2,2,1608.279070  
2,2,5066.851064  
2,2,2134.741279  
2,2,2241.832447  
2,2,3424.021739  
2,2,2827.835000  
2,2,2555.716667  
2,2,1962.641667  
2,2,1540.750000  
2,2,2633.916667  
2,2,2305.088889  
2,2,1977.386364  
2,2,2369.875000  
2,2,17310.382979  
2,2,3837.035714  
2,2,2497.308824  
2,2,5673.167630  
2,2,3541.312500  
2,2,5029.051948  
2,2,1695.991935  
2,2,3576.280488  
2,2,1998.349057  
2,2,4481.416667  
2,2,1592.326316  
2,2,3241.689655

2,2,1517.922156  
2,2,10657.064815  
2,2,5004.180095  
2,2,2255.005435  
2,2,6338.700000  
2,2,5500.554054  
2,2,3530.335366  
2,2,6316.103365  
2,2,3282.290698  
2,2,2149.935976  
2,2,1790.517857  
2,2,1736.156250  
2,2,4408.937500  
2,2,1634.674419  
2,2,2960.100000  
2,2,2063.916667  
2,2,1754.286932  
2,2,3360.315625  
2,2,4195.075000  
2,2,2399.055000  
2,2,3803.656977  
2,2,1764.532051  
2,2,2702.091463  
2,2,1979.000000  
2,2,2502.035256  
2,2,2378.167857  
2,2,1883.781250  
2,2,4536.823529  
2,2,1500.479730  
2,2,5096.487745  
2,2,3746.128205  
2,2,3793.687500  
2,2,1883.750000  
2,2,2093.295139  
2,2,2038.493750  
2,2,2571.255435  
2,2,14672.156250  
2,2,1523.130208  
2,2,1633.912736  
2,2,2806.210526  
2,2,14699.625000  
2,2,2710.034091  
2,2,7041.426020  
2,2,2242.666667  
2,2,1890.812500  
2,2,19506.559113  
2,2,2164.644444  
2,2,3176.865385  
2,2,6046.592593  
2,2,2124.000000  
2,2,2494.988636  
2,2,5436.584746  
2,2,6233.347222  
2,2,3267.837766  
2,2,2916.301282  
2,2,2192.790698  
2,2,1714.135135  
2,2,6535.779070  
2,2,4100.355556  
2,2,3123.596591  
2,2,3224.750000  
2,2,8986.539773  
2,2,1735.000000  
2,2,2482.813953  
2,2,1939.387701  
2,2,1515.367742

2,2,1730.033537  
2,2,1700.936170  
2,2,2386.587500  
2,2,3560.877841  
2,2,2360.134146  
2,2,6510.005814  
2,2,5353.558333  
2,2,4169.166667  
2,2,2183.225490  
2,2,5205.865854  
2,2,10244.112069  
2,2,1610.596875  
2,2,4646.944444  
2,2,3401.256579  
2,2,2466.972973  
2,2,5227.264881  
2,2,1713.787234  
2,2,3084.279412  
2,2,2749.347826  
2,2,1644.614865  
2,2,5109.948529  
2,2,11349.372642  
2,2,2580.133523  
2,2,4328.262500  
2,2,7999.875000  
2,2,1884.888514  
2,2,5299.500000  
2,2,3298.234043  
2,2,4796.927273  
2,2,2762.133333  
2,2,2279.864865  
2,2,2933.147059  
2,2,5928.789062  
2,2,2212.837838  
2,2,2263.772222  
2,2,2871.133333  
2,2,1923.428571  
2,2,3143.228261  
2,2,12914.276316  
2,2,4836.104167  
2,2,3277.489865  
2,2,3189.884615  
2,2,1874.644737  
2,2,3639.312500  
2,2,2644.403846  
2,2,2084.741279  
2,2,1739.302632  
2,2,12481.401042  
2,2,3140.700000  
2,2,11675.752778  
2,2,7356.138393  
2,2,1776.437500  
2,2,4208.968085  
2,2,2273.777174  
2,2,2520.609756  
2,2,1912.976744  
2,2,3220.515625  
2,2,2401.542553  
2,2,2666.061453  
2,2,8888.866667  
2,2,3377.757979  
2,2,4391.666667  
2,2,2034.696429  
2,2,1604.026316  
2,2,5427.984043  
2,2,2596.770270

2,2,3099.842593  
2,2,1866.092391  
2,2,3510.594059  
2,2,8384.292453  
2,2,2904.101852  
2,2,2429.780000  
2,2,2120.368421  
2,2,5915.989362  
2,2,1781.866667  
2,2,1764.467949  
2,2,3994.540107  
2,2,2709.567251  
2,2,2239.399497  
2,2,1511.500000  
2,2,5167.526882  
2,2,1791.539634  
2,2,2700.336207  
2,2,2249.007353  
2,2,2106.733871  
2,2,1623.844444  
2,2,1853.009146  
2,2,1565.458333  
2,2,2704.780488  
2,2,2055.584615  
2,2,3530.602857  
2,2,10844.646341  
2,2,2822.000000  
2,2,22359.798077  
2,2,7927.225000  
2,2,8957.005556  
2,2,5489.750000  
2,2,7112.218750  
2,2,4079.087805  
2,2,3887.627660  
2,2,3646.470588  
2,2,2137.698718  
2,2,5668.344828  
2,2,1587.454082  
2,2,2386.250000  
2,2,3404.136364  
2,2,1922.705128  
2,2,2411.302326  
2,2,1693.784884  
2,2,1609.240000  
2,2,12388.500000  
2,2,11005.750000  
2,2,5298.714286  
2,2,2051.018868  
2,2,2215.500000  
2,2,8947.500000  
2,2,2448.945122  
2,2,2556.356771  
2,2,1948.284153  
2,2,4172.244898  
2,2,1692.920455  
2,2,6532.612500  
2,2,8437.406915  
2,2,1848.142857  
2,2,2575.886792  
2,2,4716.456522  
2,2,1733.895408  
2,2,1776.951220  
2,2,2043.868750  
2,2,1973.600000  
2,2,2932.716667  
2,2,1568.159091

2,2,3613.250000  
2,2,4640.382979  
2,2,1730.887755  
2,2,3789.315789  
2,2,12248.093085  
2,2,3404.056962  
2,2,2149.161932  
2,2,3435.840426  
2,2,2178.343750  
2,2,2682.600000  
2,2,2151.625000  
2,2,2698.948864  
2,2,1541.027778  
2,2,3658.555851  
2,2,4605.648352  
2,2,5147.546512  
2,2,2072.960227  
2,2,2149.423469  
2,2,11200.982843  
2,2,4068.095109  
2,2,2262.251572  
2,2,4977.083799  
2,2,2778.444444  
2,2,2395.547794  
2,2,5574.108040  
2,2,2271.909677  
2,2,7771.333333  
2,2,2136.275000  
2,2,5677.265957  
2,2,3229.087766  
2,2,5600.870098  
2,2,8200.139535  
2,2,1590.283537  
2,2,3441.910256  
2,2,5811.539474  
2,2,1805.891304  
2,2,7061.041667  
2,2,5697.883152  
2,2,2002.978261  
2,2,1531.815104  
2,2,2197.833333  
2,2,10018.936047  
2,2,4262.625000  
2,2,1713.231707  
2,2,2263.097826  
2,2,3919.362500  
2,2,1519.005814  
2,2,2811.500000  
2,2,3644.038462  
2,2,3610.365854  
2,2,4513.132075  
2,2,2153.239130  
2,2,2780.736111  
2,2,5721.752717  
2,2,2437.241379  
2,2,5014.347561  
2,2,1504.763587  
2,2,6059.443452  
2,2,2069.214660  
2,2,1623.192982  
2,2,1657.621622  
2,2,3636.581395  
2,2,1654.531250  
2,2,2629.500000  
2,2,2552.717949  
2,2,2390.676923

2,2,2683.573171  
2,2,4503.247685  
2,2,4320.425926  
2,2,2483.324324  
2,2,1838.104651  
2,2,2123.572674  
2,2,3217.261364  
2,2,1943.895954  
2,2,3124.171196  
2,2,1693.734043  
2,2,1936.451429  
2,2,2438.621711  
2,2,2533.322500  
2,2,1550.488889  
2,2,2166.166667  
2,2,2076.128205  
2,2,5784.312500  
2,2,16848.875000  
2,2,4470.000000  
2,2,13149.836066  
2,2,1883.069149  
2,2,2467.750000  
2,2,2723.801630  
2,2,2858.237500  
2,2,9270.186170  
2,2,4011.957237  
2,2,1841.869186  
2,2,3361.909091  
2,2,2807.850543  
2,2,1810.913669  
2,2,2668.341463  
2,2,2246.605769  
2,2,1665.800000  
2,2,6609.296875  
2,2,3896.000000  
2,2,13218.765957  
2,2,1997.821809  
2,2,1730.562500  
2,2,2987.164634  
2,2,3762.250000  
2,2,1935.618750  
2,2,2253.218750  
2,2,1703.258929  
2,2,2705.530612  
2,2,2517.572368  
2,2,1972.730263  
2,2,2190.526316  
2,2,3843.166667  
2,2,5979.861111  
2,2,1864.557692  
2,2,1991.822086  
2,2,2448.196429  
2,2,2224.776596  
2,2,2296.539683  
2,2,5762.250000  
2,2,3438.741667  
2,2,5749.569712  
2,2,1594.338235  
2,2,2135.291667  
2,2,1948.794811  
2,2,6784.583333  
2,2,1578.189024  
2,2,1555.534091  
2,2,4026.808333  
2,2,4997.030702  
2,2,7029.093023

2,2,3606.945055  
2,2,5750.845238  
2,2,1520.928977  
2,2,7912.846939  
2,2,4709.929204  
2,2,2099.690000  
2,2,8810.285714  
2,2,8830.290698  
2,2,1637.027174  
2,2,2112.130435  
2,2,2733.000000  
2,2,5450.312500  
2,2,1875.244186  
2,2,2008.694444  
2,2,14628.229592  
2,2,8817.290909  
2,2,2434.437500  
2,2,2088.917614  
2,2,1829.456522  
2,2,5719.616766  
2,2,1847.243902  
2,2,5867.084906  
2,2,3773.235294  
2,2,1836.111111  
2,2,3788.595588  
2,2,2041.519324  
2,2,4198.209184  
2,2,4402.875000  
2,2,2660.989865  
2,2,9866.567568  
2,2,3158.707602  
2,2,6763.812500  
2,2,2159.250000  
2,2,3875.192308  
2,2,19926.085366  
2,2,2293.390000  
2,2,2622.478774  
2,2,11255.485465  
2,2,2416.545455  
2,2,6531.257212  
2,2,2610.911585  
2,2,1682.355978  
2,2,4720.510417  
2,2,3278.265000  
2,2,2761.115741  
2,2,2594.049451  
2,2,1602.094828  
2,2,2763.117021  
2,2,2011.988636  
2,2,3789.991935  
2,2,6332.627451  
2,2,6637.150000  
2,2,2328.520833  
2,2,2584.425000  
2,2,2504.209459  
2,2,4256.902857  
2,2,19446.977273  
2,2,1823.287162  
2,2,2514.182065  
2,2,2704.901961  
2,2,1961.714286  
2,2,2536.687500  
2,2,2979.317073  
2,2,1687.942857  
2,2,1555.781977  
2,2,3050.309211

2,2,1662.100000  
2,2,1946.500000  
2,2,1916.575000  
2,2,1706.209677  
2,2,3823.445652  
2,2,3826.888889  
2,2,1681.153846  
2,2,1809.319728  
2,2,1935.414474  
2,2,2298.892857  
2,2,3972.306533  
2,2,2716.722826  
2,2,2245.802500  
2,2,1790.902778  
2,2,2884.275000  
2,2,5033.526316  
2,2,2509.670455  
2,2,2183.295000  
2,2,6501.646409  
2,2,16195.517857  
2,2,2484.178082  
2,2,2503.400000  
2,2,13597.447917  
2,2,2034.754808  
2,2,3506.741071  
2,2,4603.160714  
2,2,1780.309524  
2,2,2805.797619  
2,2,1502.784091  
2,2,2018.617647  
2,2,2722.533333  
2,2,2228.436464  
2,2,2052.735849  
2,2,1665.251852  
2,2,3302.399103  
2,2,3323.899457  
2,2,5086.151316  
2,2,4666.806122  
2,2,8648.613426  
2,2,16550.916667  
2,2,1868.666667  
2,2,2397.240437  
2,2,10340.072500  
2,2,5787.811321  
2,2,2426.971354  
2,2,1935.785714  
2,2,1502.230978  
2,2,5156.357500  
2,2,3657.884615  
2,2,1812.933333  
2,2,3522.400621  
2,2,1773.270408  
2,2,1508.635870  
2,2,1879.747093  
2,2,17088.231707  
2,2,2848.981132  
2,2,2548.890449  
2,2,5422.063830  
2,2,3475.500000  
2,2,2634.972826  
2,2,2121.866667  
2,2,3315.122340  
2,2,1727.289216  
2,2,6532.542683  
2,2,2089.926282  
2,2,2826.625000

2,2,2242.698864  
2,2,4573.681122  
2,2,7780.658537  
2,2,2647.503205  
2,2,3751.166667  
2,2,7078.329861  
2,2,5500.810000  
2,2,5105.615646  
2,2,4740.935961  
2,2,2802.505000  
2,2,5019.372881  
2,2,2997.822917  
2,2,1587.791339  
2,2,1718.937500  
2,2,1691.150943  
2,2,7400.113402  
2,2,1569.148936  
2,2,10668.723404  
2,2,8279.323276  
2,2,3758.654762  
2,2,2515.250000  
2,2,1818.437500  
2,2,2470.918539  
2,2,3409.853659  
2,2,8108.294872  
2,2,2174.437500  
2,2,3380.612245  
2,2,2913.053571  
2,2,1980.303922  
2,2,3485.295213  
2,2,1952.000000  
2,2,4688.846939  
2,2,4266.860465  
2,2,2962.071429  
2,2,4818.484375  
2,2,4757.500000  
2,2,3081.267857  
2,2,3575.342105  
2,2,5553.603352  
2,2,4878.652778  
2,2,2575.670673  
2,2,1885.951389  
2,2,3503.053571  
2,2,21268.268868  
2,2,2553.697674  
2,2,4172.862705  
2,2,1841.625000  
2,2,1958.384615  
2,2,2268.445161  
2,2,2819.297872  
2,2,4875.040909  
2,2,1561.272727  
2,2,2755.147727  
2,2,2881.583333  
2,2,5339.836957  
2,2,6711.958333  
2,2,8791.452514  
2,2,2531.968750  
2,2,4783.174194  
2,2,10265.386364  
2,2,10979.920213  
2,2,2095.166667  
2,2,2451.943005  
2,2,4350.923077  
2,2,4157.220930  
2,2,2038.091837

2,2,4306.874172  
2,2,10269.625000  
2,2,4514.687500  
2,2,3225.634615  
2,2,1662.078704  
2,2,6178.710526  
2,2,4229.584184  
2,2,6320.654412  
2,2,4335.586111  
2,2,1708.966667  
2,2,1553.837500  
2,2,1752.975610  
2,2,3447.000000  
2,2,2586.117187  
2,2,3081.948718  
2,2,1733.250000  
2,2,6051.977099  
2,2,3702.465278  
2,2,4046.473684  
2,2,1624.442130  
2,2,8796.278846  
2,2,1543.386364  
2,2,6242.819444  
2,2,2005.154839  
2,2,2490.334884  
2,2,3577.555556  
2,2,1576.777778  
2,2,5158.099490  
2,2,10050.475000  
2,2,1538.319149  
2,2,3264.886792  
2,2,1814.378378  
2,2,3118.147059  
2,2,1676.805233  
2,2,2657.743590  
2,2,2726.833333  
2,2,1922.252976  
2,2,2885.198864  
2,2,1667.723404  
2,2,2718.790698  
2,2,2903.302326  
2,2,1687.787234  
2,2,5031.303030  
2,2,3492.825175  
2,2,6279.470833  
2,2,14366.371795  
2,2,2493.125000  
2,2,1702.875000  
2,2,5141.235119  
2,2,1811.258065  
2,2,3253.721154  
2,2,3586.407258  
2,2,9177.230769  
2,2,2238.584184  
2,2,11159.792411  
2,2,3746.243590  
2,2,2470.644737  
2,2,2002.390000  
2,2,8652.295455  
2,2,1824.746951  
2,2,3583.685484  
2,2,2449.562500  
2,2,1712.722222  
2,2,4737.643902  
2,2,2429.537500  
2,2,1657.779605

2,2,4552.437500  
2,2,4154.203125  
2,2,2460.592391  
2,2,3800.296296  
2,2,1646.370968  
2,2,12622.135922  
2,2,5952.105556  
2,2,2305.085366  
2,2,1660.244186  
2,2,4190.247727  
2,2,1517.630000  
2,2,1593.306452  
2,2,2841.760870  
2,2,4369.371585  
2,2,2703.346734  
2,2,2318.289773  
2,2,4778.781250  
2,2,6962.750000  
2,2,4360.178571  
2,2,3154.233696  
2,2,11892.782609  
2,2,3358.060976  
2,2,2642.081633  
2,2,4331.189024  
2,2,1522.118421  
2,2,1877.024691  
2,2,1974.961111  
2,2,2958.320000  
2,2,1991.092857  
2,2,1937.244186  
2,2,2825.226562  
2,2,6633.779412  
2,2,1629.168421  
2,2,2511.959459  
2,2,13268.812500  
2,2,4551.846354  
2,2,6722.750000  
2,2,2396.862500  
2,2,1736.779891  
2,2,7659.263158  
2,2,1779.022727  
2,2,1691.416667  
2,2,1561.892241  
2,2,1500.224359  
2,2,3617.423780  
2,2,1821.426471  
2,2,2352.100000  
2,2,7324.695531  
2,2,7811.500000  
2,2,5312.986702  
2,2,4480.879828  
2,2,3216.828488  
2,2,6590.959184  
2,2,4212.325000  
2,2,2546.774390  
2,2,3432.948864  
2,2,3314.225490  
2,2,3061.142157  
2,2,5375.610169  
2,2,3988.474490  
2,2,1690.269737  
2,2,7021.742647  
2,2,2530.015625  
2,2,3343.336538  
2,2,1873.895408  
2,2,2632.486979

2,2,1868.292553  
2,2,1564.880682  
2,2,2049.288889  
2,2,1542.593750  
2,2,2279.123153  
2,2,2446.762500  
2,2,4243.478261  
2,2,2448.955556  
2,2,2741.200000  
2,2,4927.512931  
2,2,4268.551724  
2,2,2267.423077  
2,2,2228.828125  
2,2,5305.663043  
2,2,3139.334559  
2,2,1902.035714  
2,2,3719.933673  
2,2,1705.679348  
2,2,2459.788462  
2,2,14718.446809  
2,2,3554.815000  
2,2,1748.342105  
2,2,2043.967105  
2,2,1664.384615  
2,2,5956.653846  
2,2,4204.910180  
2,2,15962.274112  
2,2,3946.209302  
2,2,4082.890625  
2,2,2449.369444  
2,2,2234.306818  
2,2,6303.429515  
2,2,2244.163934  
2,2,2113.401198  
2,2,3303.169399  
2,2,4719.368932  
2,2,2272.875000  
2,2,2470.322581  
2,2,2358.056548  
2,2,2371.769737  
2,2,5452.542553  
2,2,4933.406250  
2,2,2806.829268  
2,2,2798.437500  
2,2,6119.425926  
2,2,4153.700000  
2,2,4998.393145  
2,2,10101.107500  
2,2,6393.333333  
2,2,1856.583333  
2,2,3652.113208  
2,2,7791.390000  
2,2,2077.051136  
2,2,1682.939286  
2,2,5494.301630  
2,2,4351.551136  
2,2,2345.812500  
2,2,4931.452500  
2,2,1724.978571  
2,2,5526.443452  
2,2,1711.621951  
2,2,1995.417969  
2,2,2320.181818  
2,2,3472.336538  
2,2,1544.490385  
2,2,2471.290094

2,2,10181.963542  
2,2,5254.506944  
2,2,3159.829787  
2,2,4878.453125  
2,2,1619.139831  
2,2,2504.752841  
2,2,11152.225000  
2,2,5146.923077  
2,2,10002.405000  
2,2,3127.664062  
2,2,4909.502778  
2,2,1516.618902  
2,2,3806.423469  
2,2,2809.116667  
2,2,2349.303922  
2,2,4869.542553  
2,2,2991.661458  
2,2,1580.439189  
2,2,2169.257075  
2,2,2351.875000  
2,2,2924.435714  
2,2,6621.918919  
2,2,4410.983796  
2,2,2751.625668  
2,2,1850.268293  
2,2,1716.910615  
2,2,2578.958333  
2,2,4737.650463  
2,2,1509.953125  
2,2,8079.543478  
2,2,1514.625000  
2,2,3528.593750  
2,2,6583.420213  
2,2,2022.106383  
2,2,1963.478261  
2,2,1599.562500  
2,2,3352.780612  
2,2,3350.380000  
2,2,1656.380319  
2,2,1908.400000  
2,2,1562.449219  
2,2,2479.311364  
2,2,4924.650568  
2,2,15022.188679  
2,2,8537.954545  
2,2,4766.385650  
2,2,2690.175000  
2,2,1964.724138  
2,2,3034.744318  
2,2,7080.298611  
2,2,5654.539216  
2,2,5471.280000  
2,2,3957.458333  
2,2,1590.141447  
2,2,7914.479042  
2,2,6746.767296  
2,2,8335.384434  
2,2,4703.000000  
2,2,3588.521739  
2,2,2594.300000  
2,2,8990.793103  
2,2,3037.344828  
2,2,2294.861111  
2,2,1810.817073  
2,2,4357.583333  
2,2,1824.333333

2,2,2067.372881  
2,2,2093.828125  
2,2,5492.875000  
2,2,2288.250000  
2,2,12646.068966  
2,2,11959.570312  
2,2,8628.831250  
2,2,2012.861111  
2,2,3988.288265  
2,2,4061.000000  
2,2,3177.963576  
2,2,4242.702703  
2,2,2012.604651  
2,2,2399.318841  
2,2,2572.544118  
2,2,6220.010989  
2,2,3406.483871  
2,2,3887.922460  
2,2,3685.764205  
2,2,4608.325581  
2,2,5427.560976  
2,2,2062.276596  
2,2,3740.007813  
2,2,3979.268182  
2,2,3777.277174  
2,2,2196.333333  
2,2,4597.407407  
2,2,2884.580556  
2,2,3094.245098  
2,2,2077.014706  
2,2,1755.931548  
2,2,4272.496795  
2,2,5199.768182  
2,2,2862.141304  
2,2,2788.686170  
2,2,3395.812500  
2,2,6824.000000  
2,2,2161.098361  
2,2,4838.818627  
2,2,2468.066667  
2,2,7817.371560  
2,2,4161.763298  
2,2,2005.102564  
2,2,2873.919811  
2,2,4259.641935  
2,2,2042.458333  
2,2,1989.282895  
2,2,1501.062842  
2,2,5093.000000  
2,2,8267.055046  
2,2,1537.707317  
2,2,1688.533333  
2,2,6227.560345  
2,2,1554.970109  
2,2,5195.669643  
2,2,6456.650000  
2,2,5694.984694  
2,2,2474.827500  
2,2,6642.302885  
2,2,1557.488372  
2,2,1519.246875  
2,2,4402.500000  
2,2,1785.638889  
2,2,5505.613475  
2,2,3059.570000  
2,2,3413.052632

2,2,2188.052632  
2,2,1889.524038  
2,2,3258.776316  
2,2,3221.962264  
2,2,2887.875000  
2,2,14500.812500  
2,2,3018.909722  
2,2,1612.093750  
2,2,3282.097561  
2,2,2577.941176  
2,2,3336.088235  
2,2,1925.566038  
2,2,5178.203911  
2,2,2126.581522  
2,2,5192.173246  
2,2,1501.550802  
2,2,1918.289773  
2,2,1990.935897  
2,2,3314.641026  
2,2,7358.606250  
2,2,1880.835366  
2,2,4058.222222  
2,2,2825.500000  
2,2,1587.581395  
2,2,4842.846591  
2,2,1508.230769  
2,2,2411.485849  
2,2,1769.179054  
2,2,4441.896552  
2,2,2160.961538  
2,2,5257.346939  
2,2,1831.694444  
2,2,8673.863636  
2,2,1583.144737  
2,2,3539.545455  
2,2,2255.631818  
2,2,2421.841346  
2,2,1827.151163  
2,2,4673.398810  
2,2,2768.979651  
2,2,6711.172222  
2,2,3867.054878  
2,2,2494.491848  
2,2,2530.805556  
2,2,5575.024038  
2,2,3791.040000  
2,2,3527.286585  
2,2,1854.500000  
2,2,8998.666667  
2,2,4899.163889  
2,2,1872.628049  
2,2,4117.976064  
2,2,4030.818182  
2,2,6804.179104  
2,2,2568.000000  
2,2,2472.750000  
2,2,2178.979167  
2,2,3504.776596  
2,2,1682.812500  
2,2,3135.437500  
2,2,1551.043367  
2,2,1523.840116  
2,2,1810.015625  
2,2,2310.201923  
2,2,1792.936709  
2,2,4418.237500

2,2,1840.815000  
2,2,2446.803125  
2,2,4421.062500  
2,2,3228.459302  
2,2,6008.228659  
2,2,4136.744186  
2,2,1607.046196  
2,2,2251.533333  
2,2,2095.271277  
2,2,6836.165746  
2,2,1954.483051  
2,2,2556.815029  
2,2,3286.821429  
2,2,1579.848684  
2,2,2858.902235  
2,2,1602.390625  
2,2,9614.668981  
2,2,7326.563830  
2,2,1751.000000  
2,2,5199.752976  
2,2,3496.500000  
2,2,1549.200000  
2,2,1581.678571  
2,2,2440.472222  
2,2,3359.116071  
2,2,3440.666667  
2,2,14210.268293  
2,2,3145.470588  
2,2,3171.441860  
2,2,8777.183673  
2,2,8560.750000  
2,2,2483.347826  
2,2,1877.540816  
2,2,3761.148936  
2,2,3695.625000  
2,2,1527.927500  
2,2,2447.558140  
2,2,8735.333333  
2,2,3181.605769  
2,2,6238.500000  
2,2,2276.353659  
2,2,1845.305147  
2,2,1798.065789  
2,2,2819.293103  
2,2,1706.474265  
2,2,3237.296196  
2,2,1586.778090  
2,2,3565.991935  
2,2,3939.660000  
2,2,1734.054795  
2,2,2237.796875  
2,2,11034.187500  
2,2,7195.895735  
2,2,1938.906977  
2,2,5705.625000  
2,2,1983.000000  
2,2,1792.480769  
2,2,7458.175439  
2,2,4519.540625  
2,2,1570.017857  
2,2,2524.427778  
2,2,2974.832558  
2,2,3781.880435  
2,2,4699.350490  
2,2,1887.978571  
2,2,4679.646875

2,2,2856.069832  
2,2,2065.308824  
2,2,5680.930000  
2,2,7241.535714  
2,2,3559.305851  
2,2,3313.664474  
2,2,1796.365854  
2,2,2963.031250  
2,2,1631.921053  
2,2,4930.045455  
2,2,3649.357143  
2,2,2422.489583  
2,2,1526.145833  
2,2,2837.688636  
2,2,2039.708333  
2,2,4156.760870  
2,2,3379.052632  
2,2,3672.079787  
2,2,7324.316017  
2,2,2339.137931  
2,2,2135.917683  
2,2,8505.039352  
2,2,6922.069149  
2,2,3157.514151  
2,2,2290.307692  
2,2,3864.275000  
2,2,6657.142857  
2,2,9508.430233  
2,2,5569.340625  
2,2,3754.167598  
2,2,2655.496795  
2,2,3311.724490  
2,2,1941.250000  
2,2,7405.000000  
2,2,3755.065789  
2,2,3154.500000  
2,2,14297.352564  
2,2,2201.835366  
2,2,1715.693878  
2,2,5941.525000  
2,2,2991.619718  
2,2,3686.131313  
2,2,3030.357143  
2,2,3465.117021  
2,2,4750.310000  
2,2,5017.903061  
2,2,4040.154255  
2,2,3321.983173  
2,2,3243.019022  
2,2,2139.192308  
2,2,3630.245370  
2,2,2952.500000  
2,2,7083.212042  
2,2,8847.000000  
2,2,1651.403974  
2,2,5631.983974  
2,2,7201.625000  
2,2,3166.162791  
2,2,8127.643216  
2,2,8962.138298  
2,2,4677.591837  
2,2,14406.188679  
2,2,2143.800000  
2,2,5462.852459  
2,2,1963.142857  
2,2,3461.746667

2,2,3253.485465  
2,2,3305.583333  
2,2,3528.575581  
2,2,3112.779605  
2,2,5174.040816  
2,2,2382.173077  
2,2,2180.247340  
2,2,8302.736515  
2,2,8670.960000  
2,2,10710.139706  
2,2,2297.950000  
2,2,3771.463415  
2,2,2066.416667  
2,2,4610.672500  
2,2,4209.324675  
2,2,3047.576923  
2,2,1817.477941  
2,2,2503.750000  
2,2,14169.785714  
2,2,4275.945313  
2,2,5116.713068  
2,2,8073.913462  
2,2,4602.857143  
2,2,1529.587500  
2,2,1792.031250  
2,2,2222.081395  
2,2,5425.000000  
2,2,3185.328261  
2,2,1764.276786  
2,2,6269.414634  
2,2,6410.346591  
2,2,2088.794872  
2,2,2524.864865  
2,2,4288.211538  
2,2,3794.666667  
2,2,10594.887019  
2,2,3182.721154  
2,2,4849.850000  
2,2,2655.484043  
2,2,3656.210227  
2,2,2592.464674  
2,2,1624.988372  
2,2,2606.225000  
2,2,1657.831081  
2,2,9820.835648  
2,2,1559.000000  
2,2,2675.089744  
2,2,6703.339744  
2,2,1622.337748  
2,2,2103.593750  
2,2,1689.846154  
2,2,3035.500000  
2,2,4214.023810  
2,2,1928.505952  
2,2,2245.105263  
2,2,1597.632353  
2,2,1683.023256  
2,2,7182.333333  
2,2,6872.656250  
2,2,2816.968750  
2,2,2138.635417  
2,2,5406.459559  
2,2,6029.048780  
2,2,17574.400000  
2,2,3287.461749  
2,2,2256.191489

2,2,2443.334906  
2,2,6666.687500  
2,2,2026.554974  
2,2,1528.273256  
2,2,6182.895270  
2,2,1724.358491  
2,2,4384.960526  
2,2,2060.467949  
2,2,4987.539773  
2,2,1611.586207  
2,2,6573.609865  
2,2,2553.010050  
2,2,6369.967213  
2,2,5276.538012  
2,2,2754.073171  
2,2,3043.974194  
2,2,5755.653846  
2,2,1877.496815  
2,2,2906.609375  
2,2,1980.368056  
2,2,2437.200483  
2,2,3709.767045  
2,2,3893.729167  
2,2,3533.439024  
2,2,2289.981250  
2,2,1896.857558  
2,2,2356.579268  
2,2,19014.132353  
2,2,2713.868902  
2,2,3674.625000  
2,2,1824.146341  
2,2,16151.148148  
2,2,2934.826816  
2,2,7115.778409  
2,2,4677.164474  
2,2,2755.593750  
2,2,2329.630435  
2,2,3300.952830  
2,2,3044.984043  
2,2,10529.129032  
2,2,2224.994186  
2,2,7503.571429  
2,2,7882.419643  
2,2,13682.714286  
2,2,1722.861486  
2,2,1614.277778  
2,2,1722.600694  
2,2,8694.268750  
2,2,2759.156863  
2,2,3424.132979  
2,2,1621.269939  
2,2,2360.072917  
2,2,2525.347826  
2,2,2199.750000  
2,2,1833.828947  
2,2,1914.307692  
2,2,1608.000000  
2,2,2621.661111  
2,2,6630.795455  
2,2,3136.877193  
2,2,2067.341935  
2,2,2302.238372  
2,2,1991.333333  
2,2,7111.040698  
2,2,3317.229730  
2,2,4086.755000

2,2,6803.143750  
2,2,3487.973118  
2,2,1755.600000  
2,2,2474.711538  
2,2,2329.519231  
2,2,2595.677019  
2,2,1914.256944  
2,2,9048.919355  
2,2,5136.242188  
2,2,7677.675000  
2,2,5039.384615  
2,2,3201.906250  
2,2,2237.871875  
2,2,2439.605263  
2,2,1571.529412  
2,2,2591.674419  
2,2,7058.071429  
2,2,8103.732500  
2,2,4552.549342  
2,2,1908.877660  
2,2,2185.441489  
2,2,4806.549107  
2,2,1825.666667  
2,2,2503.026163  
2,2,2655.685897  
2,2,4102.588068  
2,2,2155.562500  
2,2,6205.654494  
2,2,4218.052632  
2,2,2294.139535  
2,2,1967.897059  
2,2,2558.895089  
2,2,2706.552632  
2,2,2748.691860  
2,2,4959.682018  
2,2,3286.156627  
2,2,8064.764940  
2,2,2354.260638  
2,2,2183.541985  
2,2,2029.490385  
2,2,1903.707317  
2,2,16906.564767  
2,2,4942.391304  
2,2,2242.218023  
2,2,3721.817130  
2,2,2304.093750  
2,2,3763.657143  
2,2,3509.869565  
2,2,2624.556291  
2,2,3678.757576  
2,2,3809.065476  
2,2,2366.307432  
2,2,3108.394886  
2,2,1685.658291  
2,2,3570.591463  
2,2,7535.250000  
2,2,6766.331633  
2,2,1687.375000  
2,2,3883.350000  
2,2,2957.687500  
2,2,2445.333333  
2,2,11004.031250  
2,2,3428.000000  
2,2,2276.700000  
2,2,2120.396277  
2,2,7972.179825

2,2,1624.381944  
2,2,1849.000000  
2,2,5428.928125  
2,2,7743.130435  
2,2,15345.790000  
2,2,2048.192073  
2,2,4805.335664  
2,2,3798.948370  
2,2,5141.229651  
2,2,2085.759259  
2,2,6978.412162  
2,2,10052.843137  
2,2,2766.296053  
2,2,2813.311047  
2,2,1837.737805  
2,2,1603.255556  
2,2,2275.500000  
2,2,1580.175000  
2,2,2114.946429  
2,2,1833.977273  
2,2,5810.996795  
2,2,2892.677885  
2,2,3444.875000  
2,2,3461.110465  
2,2,4416.573171  
2,2,2454.227273  
2,2,8035.703125  
2,2,1513.211538  
2,2,7298.091216  
2,2,6257.690217  
2,2,2733.892157  
2,2,5946.264706  
2,2,10343.032258  
2,2,3995.058824  
2,2,2522.981250  
2,2,2491.225694  
2,2,3217.702703  
2,2,93743.870968  
2,2,2801.380319  
2,2,2932.818182  
2,2,1599.004717  
2,2,3008.918367  
2,2,2820.575758  
2,2,2125.627027  
2,2,3420.300481  
2,2,3916.689655  
2,2,1954.952500  
2,2,4049.299419  
2,2,4355.073529  
2,2,5232.582418  
2,2,1855.830189  
2,2,1778.967391  
2,2,4373.425824  
2,2,2222.076923  
2,2,4384.819149  
2,2,3668.303125  
2,2,1962.835366  
2,2,2313.123762  
2,2,1658.408867  
2,2,8745.495575  
2,2,2017.333333  
2,2,2345.595588  
2,2,8488.167553  
2,2,2753.857143  
2,2,3194.584270  
2,2,2626.773438

2,2,1726.682836  
2,2,9347.836538  
2,2,2146.944149  
2,2,2090.640625  
2,2,1952.362832  
2,2,2443.135870  
2,2,2373.600000  
2,2,3220.627907  
2,2,1708.714286  
2,2,10656.875000  
2,2,1734.512821  
2,2,2742.967320  
2,2,1731.062500  
2,2,7187.625000  
2,2,4244.774038  
2,2,1941.331522  
2,2,11909.657895  
2,2,1952.160714  
2,2,3848.705189  
2,2,4358.115566  
2,2,3579.566667  
2,2,4176.801630  
2,2,36233.307692  
2,2,3356.022222  
2,2,7194.407186  
2,2,1834.179104  
2,2,2640.096354  
2,2,21369.237981  
2,2,1900.500000  
2,2,2766.090426  
2,2,3861.339286  
2,2,6555.194444  
2,2,4973.760000  
2,2,5640.534314  
2,2,1619.021429  
2,2,6108.846774  
2,2,2126.750000  
2,2,14526.273438  
2,2,14980.894472  
2,2,2195.601227  
2,2,1848.292683  
2,2,4739.167453  
2,2,7765.285714  
2,2,1594.200581  
2,2,1886.791667  
2,2,3743.050439  
2,2,2796.055556  
2,2,5745.588235  
2,2,1531.153061  
2,2,5193.818182  
2,2,2862.822368  
2,2,4759.137255  
2,2,5733.005208  
2,2,6938.914894  
2,2,2850.803571  
2,2,4716.318182  
2,2,4836.908654  
2,2,2035.612500  
2,2,1939.186170  
2,2,2358.643243  
2,2,6772.138393  
2,2,2303.012255  
2,2,2613.569892  
2,2,2202.936170  
2,2,3375.091346  
2,2,3656.993750

2,2,3366.798913  
2,2,3231.985465  
2,2,8429.883721  
2,2,3591.426136  
2,2,5830.257353  
2,2,1795.184211  
2,2,3169.184375  
2,2,1603.583333  
2,2,2939.031250  
2,2,1513.270833  
2,2,8509.177083  
2,2,7221.900000  
2,2,2348.720930  
2,2,1657.955729  
2,2,5328.516667  
2,2,2186.906250  
2,2,2484.051282  
2,2,5423.188776  
2,2,6652.238095  
2,2,3688.694444  
2,2,3366.882653  
2,2,5535.639205  
2,2,6587.040201  
2,2,2900.222222  
2,2,4239.388554  
2,2,2751.625000  
2,2,5028.287736  
2,2,5128.890995  
2,2,3580.387755  
2,2,6106.000000  
2,2,2739.421053  
2,2,18075.923077  
2,2,3422.666667  
2,2,2145.409836  
2,2,1741.506098  
2,2,1667.425532  
2,2,3380.195652  
2,2,14116.035714  
2,2,3287.413889  
2,2,3480.269737  
2,2,2174.508621  
2,2,2063.375000  
2,2,1601.562500  
2,2,4451.097561  
2,2,2042.358491  
2,2,4160.830189  
2,2,2956.000000  
2,2,3074.297872  
2,2,2371.875000  
2,2,2478.435714  
2,2,2047.587838  
2,2,1788.275000  
2,2,2858.431250  
2,2,3293.722222  
2,2,2064.218750  
2,2,2650.118243  
2,2,3510.540323  
2,2,3107.755556  
2,2,2504.250000  
2,2,2586.000000  
2,2,2051.782609  
2,2,4030.400000  
2,2,2306.731250  
2,2,1587.057692  
2,2,7626.857143  
2,2,2333.038265

2,2,3175.328125  
2,2,2901.381250  
2,2,2207.417763  
2,2,2998.115385  
2,2,1587.166667  
2,2,6953.277778  
2,2,3004.288462  
2,2,7099.057692  
2,2,2844.970588  
2,2,4178.130682  
2,2,30217.675000  
2,2,4303.400000  
2,2,4114.056250  
2,2,2233.784574  
2,2,5577.104651  
2,2,5861.290948  
2,2,9865.781977  
2,2,1607.733696  
2,2,8323.649457  
2,2,3970.750000  
2,2,2353.803571  
2,2,5189.855556  
2,2,4990.552083  
2,2,5551.312500  
2,2,3231.278846  
2,2,1898.515625  
2,2,4212.092105  
2,2,3012.233333  
2,2,2982.361702  
2,2,6072.787234  
2,2,3392.189024  
2,2,3629.093750  
2,2,4813.346698  
2,2,1519.718750  
2,2,2046.390625  
2,2,2058.213235  
2,2,6339.298295  
2,2,2097.710000  
2,2,2357.018293  
2,2,3897.297619  
2,2,1786.934028  
2,2,1584.959677  
2,2,5033.074468  
2,2,6488.867925  
2,2,3447.243590  
2,2,1984.460526  
2,2,1664.036765  
2,2,3292.553191  
2,2,1898.637500  
2,2,1634.472727  
2,2,7018.274390  
2,2,3201.235000  
2,2,5174.875000  
2,2,1536.500000  
2,2,1989.636792  
2,2,10367.300000  
2,2,5661.250000  
2,2,5218.200000  
2,2,7812.555556  
2,2,1911.326087  
2,2,1833.950581  
2,2,1772.878049  
2,2,2171.011905  
2,2,4454.806452  
2,2,12526.266667  
2,2,2112.818182

2,2,2637.447368  
2,2,3678.534722  
2,2,5509.632353  
2,2,3032.135135  
2,2,2274.473684  
2,2,2279.176136  
2,2,3506.122642  
2,2,1684.443878  
2,2,1687.854167  
2,2,2208.915625  
2,2,9989.736486  
2,2,2843.328125  
2,2,1816.431548  
2,2,2152.095395  
2,2,1831.779605  
2,2,4437.943069  
2,2,2070.959184  
2,2,1655.000000  
2,2,2062.454545  
2,2,1635.225806  
2,2,3991.840426  
2,2,1983.882653  
2,2,1687.456633  
2,2,3169.787500  
2,2,1599.365854  
2,2,1640.125000  
2,2,5734.796875  
2,2,8033.571121  
2,2,3674.985294  
2,2,2205.633721  
2,2,1512.666667  
2,2,5961.230769  
2,2,1998.759868  
2,2,6111.812500  
2,2,1579.333333  
2,2,1619.582888  
2,2,2925.671875  
2,2,1576.732143  
2,2,21060.791667  
2,2,5971.413462  
2,2,5049.902778  
2,2,2623.337209  
2,2,10698.025000  
2,2,7239.584135  
2,2,3631.000000  
2,2,2428.416667  
2,2,1791.447368  
2,2,3176.681818  
2,2,1725.928977  
2,2,1639.467391  
2,2,1636.036585  
2,2,14151.235577  
2,2,1693.887195  
2,2,2549.433140  
2,2,2428.859756  
2,2,6736.095930  
2,2,2141.181818  
2,2,5525.574519  
2,2,1957.759091  
2,2,5915.436275  
2,2,3776.072500  
2,2,4719.555233  
2,2,3230.616667  
2,2,1937.619048  
2,2,2435.065217  
2,2,3553.715000

2,2,1845.777174  
2,2,1740.950000  
2,2,12660.225000  
2,2,6856.962264  
2,2,10117.388601  
2,2,9933.700893  
2,2,7654.778378  
2,2,3660.135922  
2,2,4028.677596  
2,2,1723.213287  
2,2,2313.338129  
2,2,2153.619318  
2,2,1843.398649  
2,2,2225.545455  
2,2,2488.080556  
2,2,2971.760000  
2,2,2394.078125  
2,2,1612.230114  
2,2,1862.228261  
2,2,1953.015625  
2,2,2504.456522  
2,2,3511.767442  
2,2,1738.516304  
2,2,2194.777778  
2,2,2303.427632  
2,2,3278.553191  
2,2,2082.540541  
2,2,4615.844828  
2,2,1648.614286  
2,2,6000.188953  
2,2,1663.000000  
2,2,1879.306373  
2,2,1817.325000  
2,2,9645.200000  
2,2,2749.094595  
2,2,2175.258294  
2,2,3082.235000  
2,2,4551.310976  
2,2,4427.847973  
2,2,1653.470930  
2,2,20918.911765  
2,2,6905.027778  
2,2,4122.625000  
2,2,3601.134615  
2,2,2912.105556  
2,2,3539.852941  
2,2,4190.965517  
2,2,2082.899457  
2,2,4904.583333  
2,2,5010.127660  
2,2,7245.906250  
2,2,4751.769608  
2,2,2511.470588  
2,2,1933.440789  
2,2,5973.675497  
2,2,2374.512500  
2,2,1759.583333  
2,2,7706.810185  
2,2,2046.718085  
2,2,3253.954082  
2,2,2235.258278  
2,2,6431.298246  
2,2,3289.104651  
2,2,6505.264423  
2,2,11939.214286  
2,2,1948.326705

2,2,2161.621711  
2,2,5904.559748  
2,2,17905.025140  
2,2,3104.679012  
2,2,2998.596774  
2,2,5661.666667  
2,2,1837.494565  
2,2,2689.437500  
2,2,2614.038889  
2,2,2014.920455  
2,2,1585.948980  
2,2,1746.853659  
2,2,3034.531915  
2,2,15972.937500  
2,2,7965.991453  
2,2,1726.666667  
2,2,2595.111842  
2,2,2752.927885  
2,2,2350.250000  
2,2,2463.743421  
2,2,7057.317500  
2,2,1796.600000  
2,2,3384.839109  
2,2,1716.085366  
2,2,1976.066489  
2,2,6083.488152  
2,2,1590.875000  
2,2,9924.430556  
2,2,5767.986979  
2,2,3714.534884  
2,2,7254.178571  
2,2,6011.169492  
2,2,5401.716346  
2,2,3439.520833  
2,2,5735.068182  
2,2,3459.835938  
2,2,2427.673469  
2,2,3989.784091  
2,2,2522.694767  
2,2,4337.307432  
2,2,3275.835106  
2,2,1936.023026  
2,2,3459.742188  
2,2,4420.397959  
2,2,4989.813953  
2,2,2043.762500  
2,2,6686.161184  
2,2,28897.958333  
2,2,1725.361842  
2,2,2191.776042  
2,2,2689.530488  
2,2,2076.520000  
2,2,3029.803571  
2,2,2721.390625  
2,2,1881.988439  
2,2,1824.500000  
2,2,2129.283871  
2,2,4466.343590  
2,2,1700.558140  
2,2,4998.363636  
2,2,1720.783784  
2,2,3221.096059  
2,2,6272.612565  
2,2,5958.000000  
2,2,2939.061111  
2,2,1609.634615

2,2,2020.754545  
2,2,3829.112500  
2,2,4619.461538  
2,2,1698.051471  
2,2,1550.395683  
2,2,5857.814978  
2,2,3290.084302  
2,2,6628.880952  
2,2,3037.829327  
2,2,2029.894040  
2,2,2906.825000  
2,2,1785.141892  
2,2,2075.711538  
2,2,2192.039474  
2,2,2906.666667  
2,2,2066.660377  
2,2,3388.807692  
2,2,9022.197222  
2,2,6815.425676  
2,2,4636.323529  
2,2,2294.536932  
2,2,3413.666667  
2,2,2819.390244  
2,2,4999.148936  
2,2,12111.714286  
2,2,2169.666667  
2,2,1987.105263  
2,2,4397.090000  
2,2,1983.921569  
2,2,2725.296053  
2,2,3759.815217  
2,2,1571.931818  
2,2,2018.789474  
2,2,5269.333333  
2,2,2686.058140  
2,2,1511.107692  
2,2,4028.300000  
2,2,1616.333333  
2,2,2258.188679  
2,2,3351.903846  
2,2,3857.000000  
2,2,9703.500000  
2,2,1580.005682  
2,2,12030.890351  
2,2,2797.472362  
2,2,7887.053476  
2,2,1946.051163  
2,2,1607.036458  
2,2,2647.780000  
2,2,5242.292553  
2,2,4471.076531  
2,2,1618.154762  
2,2,2670.218750  
2,2,5410.154930  
2,2,37993.739130  
2,2,4744.433962  
2,2,2077.394231  
2,2,2444.187192  
2,2,3186.415625  
2,2,2641.632353  
2,2,2595.755102  
2,2,8697.388393  
2,2,5619.821429  
2,2,4707.544271  
2,2,10308.929245  
2,2,3670.733108

2,2,2172.437126  
2,2,2302.460227  
2,2,1515.986301  
2,2,4387.794286  
2,2,1772.136364  
2,2,1632.206395  
2,2,5294.666667  
2,2,1644.420673  
2,2,3211.178571  
2,2,1843.480000  
2,2,1524.234043  
2,2,5494.579741  
2,2,10151.795290  
2,2,1702.736842  
2,2,14037.068421  
2,2,3682.660494  
2,2,4835.852941  
2,2,5862.080000  
2,2,4317.731707  
2,2,12849.684426  
2,2,2497.302326  
2,2,1791.592262  
2,2,4207.871951  
2,2,2325.400510  
2,2,3735.923913  
2,2,5962.158163  
2,2,2569.329167  
2,2,2544.747283  
2,2,2935.197727  
2,2,2839.194444  
2,2,11269.150000  
2,2,17531.385714  
2,2,8694.054348  
2,2,1578.628205  
2,2,3851.994536  
2,2,1499.152174  
2,2,4080.463415  
2,2,3024.964286  
2,2,33540.950000  
2,2,7552.732558  
2,2,1542.923077  
2,2,2616.367299  
2,2,1985.420530  
2,2,2173.453488  
2,2,3425.928571  
2,2,5896.025510  
2,2,3246.693750  
2,2,2107.980000  
2,2,9432.833333  
2,2,1543.968750  
2,2,4139.407407  
2,2,2343.050000  
2,2,2028.091837  
2,2,2897.869565  
2,2,3817.333333  
2,2,1761.955729  
2,2,2242.296196  
2,2,11342.600000  
2,2,4564.077093  
2,2,6559.282609  
2,2,12283.875000  
2,2,6842.463415  
2,2,2952.114130  
2,2,2060.391304  
2,2,5994.421525  
2,2,2898.661765

2,2,2680.542553  
2,2,3918.931818  
2,2,7967.686235  
2,2,1840.387755  
2,2,2017.810256  
2,2,3356.825658  
2,2,1963.437500  
2,2,2099.976331  
2,2,2051.200581  
2,2,1900.250000  
2,2,1875.856383  
2,2,1657.622500  
2,2,4923.203804  
2,2,1565.476440  
2,2,5855.189944  
2,2,2288.304348  
2,2,2108.072115  
2,2,2559.755814  
2,2,3740.439103  
2,2,2004.644737  
2,2,1527.750000  
2,2,3078.827381  
2,2,3422.125000  
2,2,1833.503125  
2,2,1982.648438  
2,2,4276.097222  
2,2,1759.837209  
2,2,3687.000000  
2,2,3069.102564  
2,2,2310.758621  
2,2,2195.593750  
2,2,10664.845982  
2,2,2099.334586  
2,2,14724.546703  
2,2,3025.558252  
2,2,4483.000000  
2,2,1646.000000  
2,2,3793.687500  
2,2,1636.813953  
2,2,2831.734597  
2,2,4258.766447  
2,2,5161.754545  
2,2,10776.812834  
2,2,5550.176471  
2,2,3386.000000  
2,2,24813.818653  
2,2,3545.158416  
2,2,2881.709459  
2,2,2280.909091  
2,2,5663.595745  
2,2,2068.824324  
2,2,2927.787500  
2,2,6746.189655  
2,2,7356.367347  
2,2,3800.278409  
2,2,3801.069767  
2,2,1980.316327  
2,2,6192.773585  
2,2,2715.970000  
2,2,2046.382812  
2,2,1924.670455  
2,2,1688.812500  
2,2,3059.665541  
2,2,3570.536765  
2,2,9592.944444  
2,2,5769.663043

2,2,1499.212766  
2,2,3180.205128  
2,2,2539.735795  
2,2,4687.437500  
2,2,1908.436111  
2,2,6060.706383  
2,2,5807.358333  
2,2,7291.852500  
2,2,4397.861111  
2,2,1993.583333  
2,2,1712.897959  
2,2,1523.673913  
2,2,3123.328125  
2,2,2312.665816  
2,2,2204.321429  
2,2,6242.973214  
2,2,5807.370192  
2,2,2968.150000  
2,2,5839.476293  
2,2,3589.574850  
2,2,4122.584475  
2,2,2024.617021  
2,2,6601.785000  
2,2,3082.812500  
2,2,20355.723214  
2,2,2462.966463  
2,2,2225.558824  
2,2,6160.500000  
2,2,1576.918919  
2,2,23005.372549  
2,2,2500.045455  
2,2,1549.927673  
2,2,2163.564103  
2,2,1767.261364  
2,2,7828.165909  
2,2,1724.156977  
2,2,2327.261628  
2,2,3487.685897  
2,2,2812.963942  
2,2,3084.246622  
2,2,1886.306122  
2,2,3102.706522  
2,2,1740.027174  
2,2,4183.078804  
2,2,2230.484043  
2,2,3410.516304  
2,2,3045.553571  
2,2,1994.395833  
2,2,2259.500000  
2,2,15041.049180  
2,2,3117.039062  
2,2,3861.294643  
2,2,12871.255208  
2,2,2051.037791  
2,2,5416.829082  
2,2,2240.750000  
2,2,6288.825658  
2,2,1690.522727  
2,2,4077.763158  
2,2,2125.000000  
2,2,1606.000000  
2,2,2672.791667  
2,2,1947.063953  
2,2,2454.806452  
2,2,2187.906250  
2,2,3220.585106

2,2,6062.479167  
2,2,3734.565217  
2,2,5705.151163  
2,2,3251.636364  
2,2,3732.636364  
2,2,3102.857143  
2,2,2604.477778  
2,2,2495.804348  
2,2,2440.585106  
2,2,2474.088816  
2,2,4988.719388  
2,2,3911.113426  
2,2,4065.477528  
2,2,3120.725000  
2,2,3748.925532  
2,2,12291.314286  
2,2,1936.114362  
2,2,4365.275000  
2,2,3503.780612  
2,2,4463.062500  
2,2,3258.976048  
2,2,3776.214286  
2,2,3037.829787  
2,2,4646.511628  
2,2,2166.789474  
2,2,2937.739011  
2,2,1532.128049  
2,2,2413.632143  
2,2,3224.416667  
2,2,24810.209677  
2,2,1770.950000  
2,2,1778.758929  
2,2,2247.239583  
2,2,3125.707317  
2,2,33256.717949  
2,2,11841.552273  
2,2,2573.600000  
2,2,2775.768156  
2,2,2000.928571  
2,2,2330.125000  
2,2,1980.088889  
2,2,2002.962766  
2,2,6417.597561  
2,2,4451.957627  
2,2,8156.909091  
2,2,1908.599359  
2,2,3367.786765  
2,2,5349.693548  
2,2,1829.160000  
2,2,8527.379717  
2,2,1751.333333  
2,2,2825.045872  
2,2,5299.000000  
2,2,23223.530612  
2,2,2231.500000  
2,2,1737.750000  
2,2,2371.239130  
2,2,8716.675481  
2,2,6702.722222  
2,2,4001.659091  
2,2,6022.275000  
2,2,3917.594241  
2,2,1642.600000  
2,2,2564.845109  
2,2,8397.380319  
2,2,1791.177419

2,2,2002.360294  
2,2,9650.930952  
2,2,2034.201923  
2,2,3155.835227  
2,2,4760.173469  
2,2,12324.704082  
2,2,1602.546053  
2,2,2744.922727  
2,2,5612.269231  
2,2,9382.168367  
2,2,2790.173913  
2,2,8039.406977  
2,2,7089.937500  
2,2,2513.857143  
2,2,2920.565789  
2,2,3453.361111  
2,2,8576.262931  
2,2,1617.187500  
2,2,2628.555556  
2,2,4042.982759  
2,2,2219.831081  
2,2,4372.431818  
2,2,5593.709135  
2,2,3388.062500  
2,2,3386.803030  
2,2,2884.235294  
2,2,1936.500000  
2,2,2315.195312  
2,2,2341.710106  
2,2,6191.040816  
2,2,3419.953125  
2,2,48246.500000  
2,2,5188.809211  
2,2,2614.953488  
2,2,4248.105263  
2,2,2264.210526  
2,2,3038.855263  
2,2,2315.603448  
2,2,1965.708609  
2,2,4796.704545  
2,2,2582.763889  
2,2,4332.620087  
2,2,2418.843750  
2,2,1836.386243  
2,2,2635.281250  
2,2,2104.170455  
2,2,1601.715116  
2,2,1514.506757  
2,2,6985.963415  
2,2,2801.250000  
2,2,2034.602941  
2,2,4668.830556  
2,2,2081.519231  
2,2,2365.700000  
2,2,1860.714286  
2,2,3321.230769  
2,2,7001.946429  
2,2,1684.794271  
2,2,4093.070064  
2,2,1658.358974  
2,2,1675.261765  
2,2,4399.840000  
2,2,2370.615385  
2,2,6216.530172  
2,2,3426.023256  
2,2,1990.682353

2,2,5059.607143  
2,2,3949.325301  
2,2,1835.739130  
2,2,3057.962500  
2,2,2840.398268  
2,2,12796.428571  
2,2,4177.252907  
2,2,3199.402174  
2,2,2391.585227  
2,2,7524.553571  
2,2,9790.127451  
2,2,2474.600000  
2,2,9994.343373  
2,2,3160.519886  
2,2,7305.000000  
2,2,1499.464674  
2,2,3280.291667  
2,2,4012.102273  
2,2,2567.423469  
2,2,2561.923077  
2,2,2196.951087  
2,2,1862.819079  
2,2,3164.420765  
2,2,3801.571429  
2,2,2298.689655  
2,2,2151.789286  
2,2,1597.145833  
2,2,5162.556818  
2,2,1540.724359  
2,2,5049.646429  
2,2,5481.908654  
2,2,1518.947368  
2,2,6977.267544  
2,2,9937.219512  
2,2,9467.310096  
2,2,4085.905000  
2,2,3903.070652  
2,2,4088.100962  
2,2,2737.125000  
2,2,2055.807692  
2,2,6511.023649  
2,2,2200.190476  
2,2,1628.442935  
2,2,1504.932927  
2,2,3546.760870  
2,2,2037.596154  
2,2,3440.895833  
2,2,6307.453488  
2,2,1771.952500  
2,2,1519.853659  
2,2,3999.125000  
2,2,4398.988372  
2,2,1975.978610  
2,2,5233.956522  
2,2,1815.961538  
2,2,1860.934783  
2,2,2919.898148  
2,2,2056.093750  
2,2,32444.519022  
2,2,1657.878049  
2,2,3951.812500  
2,2,17966.301370  
2,2,3474.305556  
2,2,3589.625000  
2,2,7441.968750  
2,2,3683.408854

2,2,2184.857143  
2,2,2287.279605  
2,2,3426.250000  
2,2,5153.651961  
2,2,1521.456250  
2,2,2073.942857  
2,2,2386.108911  
2,2,1735.687097  
2,2,1777.039634  
2,2,3008.609756  
2,2,2022.956522  
2,2,1774.163462  
2,2,1939.167683  
2,2,8296.440341  
2,2,2051.604651  
2,2,1524.153571  
2,2,2981.812500  
2,2,2384.869444  
2,2,5883.687500  
2,2,2815.409091  
2,2,1900.190476  
2,2,1858.875000  
2,2,2740.635417  
2,2,11749.922170  
2,2,4373.041667  
2,2,1701.012500  
2,2,2874.821429  
2,2,2309.640625  
2,2,5758.500000  
2,2,5547.330645  
2,2,3532.798658  
2,2,1593.433333  
2,2,7454.950000  
2,2,1743.903846  
2,2,3095.884615  
2,2,1790.422500  
2,2,3481.210526  
2,2,2762.625000  
2,2,5960.727545  
2,2,5017.089744  
2,2,5726.411765  
2,2,2499.845238  
2,2,1617.531250  
2,2,2095.596154  
2,2,1782.197674  
2,2,2815.877143  
2,2,2321.812821  
2,2,7827.865385  
2,2,3086.000000  
2,2,1583.764706  
2,2,1879.300000  
2,2,2048.052632  
2,2,2071.588068  
2,2,2525.756757  
2,2,3236.928571  
2,2,5284.573864  
2,2,2028.679070  
2,2,5811.937500  
2,2,4014.440789  
2,2,2354.485294  
2,2,2550.363208  
2,2,1942.324324  
2,2,4731.250000  
2,2,16157.025510  
2,2,1701.312500  
2,2,4909.766990

2,2,2784.614943  
2,2,2821.711538  
2,2,30144.435583  
2,2,2981.375000  
2,2,1546.723214  
2,2,3949.118280  
2,2,1972.813131  
2,2,1656.000000  
2,2,5689.666667  
2,2,4190.360000  
2,2,1842.558140  
2,2,1836.422414  
2,2,2399.144444  
2,2,5236.444444  
2,2,1544.243902  
2,2,4387.943750  
2,2,3296.351190  
2,2,9791.040761  
2,2,4493.021739  
2,2,1760.583333  
2,2,8260.333333  
2,2,2033.136628  
2,2,6845.719340  
2,2,7647.650000  
2,2,4277.025000  
2,2,1965.020833  
2,2,1655.704787  
2,2,3103.578947  
2,2,1703.107143  
2,2,2985.096774  
2,2,3005.965116  
2,2,4450.659524  
2,2,3913.267773  
2,2,3260.068720  
2,2,1864.574324  
2,2,6761.579545  
2,2,2352.809783  
2,2,5086.729651  
2,2,2757.437500  
2,2,3460.762500  
2,2,1751.406977  
2,2,1711.840278  
2,2,3228.636364  
2,2,1889.992647  
2,2,1557.142857  
2,2,10626.394231  
2,2,2737.676724  
2,2,3301.756696  
2,2,6205.775510  
2,2,1624.513158  
2,2,2257.541667  
2,2,3951.944079  
2,2,1876.512500  
2,2,2033.334559  
2,2,6300.692308  
2,2,12414.944444  
2,2,1725.231707  
2,2,7577.452778  
2,2,3440.826923  
2,2,7542.953704  
2,2,1971.703704  
2,2,2707.500000  
2,2,1923.711538  
2,2,7283.688889  
2,2,2336.511628  
2,2,1524.378049

2,2,9375.224490  
2,2,11459.488636  
2,2,14729.804348  
2,2,1521.401130  
2,2,3135.060606  
2,2,5034.887931  
2,2,10910.088235  
2,2,1644.950000  
2,2,1899.672794  
2,2,2146.161585  
2,2,3169.440625  
2,2,3892.920732  
2,2,1995.708543  
2,2,4742.225610  
2,2,2029.072500  
2,2,2603.254386  
2,2,2396.885135  
2,2,1615.969849  
2,2,4188.167665  
2,2,1803.434375  
2,2,3071.771277  
2,2,6591.296774  
2,2,3781.269231  
2,2,4982.663462  
2,2,3462.000000  
2,2,1538.783537  
2,2,1627.358696  
2,2,3532.409091  
2,2,8041.536458  
2,2,1594.880597  
2,2,4816.719340  
2,2,2425.413043  
2,2,2915.186047  
2,2,2605.968750  
2,2,1767.203947  
2,2,1623.230978  
2,2,5814.095238  
2,2,3193.095588  
2,2,4649.739130  
2,2,1795.700000  
2,2,3836.175481  
2,2,3912.500000  
2,2,13394.276316  
2,2,3238.756098  
2,2,5241.118902  
2,2,8255.456250  
2,2,1999.426829  
2,2,2693.528634  
2,2,1848.901042  
2,2,1815.842857  
2,2,2309.778646  
2,2,1614.496644  
2,2,2340.598404  
2,2,1934.412500  
2,2,9970.701087  
2,2,4067.071875  
2,2,2583.832386  
2,2,16008.683824  
2,2,2270.918605  
2,2,6331.652500  
2,2,2912.517442  
2,2,7902.829787  
2,2,5647.853365  
2,2,3620.010000  
2,2,7148.666667  
2,2,1828.277778

2,2,2582.103352  
2,2,2711.009615  
2,2,4777.562500  
2,2,8290.875000  
2,2,1724.362069  
2,2,1705.093750  
2,2,5108.507812  
2,2,2817.743750  
2,2,1660.862745  
2,2,15693.500000  
2,2,2332.411111  
2,2,1631.914773  
2,2,11466.953571  
2,2,2063.177083  
2,2,1913.535211  
2,2,2730.860465  
2,2,3014.405000  
2,2,7590.880435  
2,2,3654.673077  
2,2,2353.959677  
2,2,2142.405063  
2,2,2141.333333  
2,2,3233.507853  
2,2,1784.622500  
2,2,1590.777439  
3,1,14164.562500  
3,1,4000.576087  
3,1,39280.637195  
3,1,3647.697368  
3,1,2194.910180  
3,1,5292.042553  
3,1,1575.931548  
3,1,188886.902439  
3,1,2924.375000  
3,1,3411.515152  
3,1,2645.848958  
3,1,2849.555556  
3,1,6091.934524  
3,1,7776.769737  
3,1,4559.935484  
3,1,3252.085366  
3,1,2494.989362  
3,1,1642.886364  
3,1,1768.928571  
3,1,5426.741071  
3,1,8573.176020  
3,1,8797.698529  
3,1,3234.852679  
3,1,2405.863971  
3,1,12678.215278  
3,1,6651.091667  
3,1,1640.110294  
3,1,7506.406250  
3,1,2657.755952  
3,1,1897.170213  
3,1,6736.470588  
3,1,5518.014706  
3,1,4778.600000  
3,1,3173.176471  
3,1,8329.178571  
3,1,1607.431818  
3,1,3043.913462  
3,1,1997.230114  
3,1,3762.766129  
3,1,7209.269531  
3,1,170015.375000

3,1,170078.554878  
3,1,3415.900000  
3,1,1561.414773  
3,1,1517.666667  
3,1,16598.000000  
3,1,4158.041667  
3,1,5492.141509  
3,1,4683.370968  
3,1,54933.648649  
3,1,2841.941176  
3,1,3236.500000  
3,1,1548.948718  
3,1,2678.069444  
3,1,2395.942308  
3,1,3607.400000  
3,1,21966.171875  
3,1,10795.272727  
3,1,3912.952128  
3,1,9362.841346  
3,1,2572.370536  
3,1,1715.996795  
3,1,186548.903846  
3,1,4334.138889  
3,1,27753.584459  
3,1,4846.585526  
3,1,1543.925000  
3,1,3234.775000  
3,1,2817.140244  
3,1,3963.920455  
3,1,69219.750000  
3,1,3551.883929  
3,1,1641.192308  
3,1,6297.705882  
3,1,6682.617021  
3,1,3466.979167  
3,1,3369.487245  
3,1,1722.500000  
3,1,2124.143229  
3,1,10046.776515  
3,1,3927.900943  
3,1,3505.625000  
3,1,1745.840909  
3,1,1927.445312  
3,1,10717.607143  
3,1,1887.598837  
3,1,2918.414634  
3,1,9203.443396  
3,1,25648.440476  
3,1,1578.692308  
3,1,1704.796196  
3,1,4523.645455  
3,1,1677.156250  
3,1,2929.603448  
3,1,2802.054054  
3,1,8213.880814  
3,1,2448.152439  
3,1,1878.434659  
3,1,1833.750000  
3,1,3665.375000  
3,1,14618.950000  
3,1,4112.923077  
3,1,5790.139706  
3,1,161799.826923  
3,1,60742.874251  
3,1,7499.984925  
3,1,6760.250000

3,1,3237.557692  
3,1,2914.625000  
3,1,3844.130208  
3,1,2019.429348  
3,1,2080.401042  
3,1,1861.815341  
3,1,30868.303125  
3,1,4749.404412  
3,1,62071.068966  
3,1,16639.135417  
3,1,2301.092105  
3,1,3096.475000  
3,1,1828.000000  
3,1,2042.296875  
3,1,1610.250000  
3,1,2258.727273  
3,1,2126.333333  
3,1,79063.731250  
3,1,4376.739130  
3,1,6274.428571  
3,1,1911.219512  
3,1,3862.992647  
3,1,4486.560606  
3,1,20439.033784  
3,1,1625.309524  
3,1,6871.372283  
3,1,5698.346591  
3,1,1587.452206  
3,1,3032.255682  
3,1,2487.509804  
3,1,2228.275000  
3,1,2570.334906  
3,1,6818.162791  
3,1,11522.750000  
3,1,12962.136364  
3,1,3675.297794  
3,1,4426.884146  
3,1,11159.321429  
3,1,2753.878378  
3,1,1927.675000  
3,1,9710.743590  
3,1,12039.000000  
3,1,2154.187500  
3,1,4394.500000  
3,1,2650.962500  
3,1,1537.000000  
3,1,1607.450000  
3,1,6194.000000  
3,1,2044.595588  
3,1,2588.500000  
3,1,5542.046875  
3,1,1543.145000  
3,1,3110.863636  
3,1,1740.306250  
3,1,2031.926829  
3,1,43808.821429  
3,1,3448.009259  
3,1,2211.125000  
3,1,4023.244898  
3,1,2288.622222  
3,1,5778.709459  
3,1,2133.836957  
3,1,2134.280488  
3,1,1866.257143  
3,1,48344.534884  
3,1,1830.333333

3,1,22940.905405  
3,1,9680.209459  
3,1,2098.723214  
3,1,3659.598485  
3,1,6264.566667  
3,1,4862.844340  
3,1,2463.566667  
3,1,2644.134868  
3,1,2428.281250  
3,1,12012.677835  
3,1,2089.089286  
3,1,2927.647727  
3,1,6415.099138  
3,1,2847.953297  
3,1,1724.505556  
3,1,36315.045732  
3,1,75351.990625  
3,1,3100.775000  
3,1,3764.641304  
3,1,10917.066327  
3,1,2662.441176  
3,1,1677.988095  
3,1,4631.370098  
3,1,2769.487805  
3,1,5626.455696  
3,1,2756.710938  
3,1,1991.910326  
3,1,2678.701923  
3,1,1524.600000  
3,1,2005.269231  
3,1,1547.946023  
3,1,25941.340909  
3,1,1696.914634  
3,1,1701.913462  
3,1,5069.782609  
3,1,3161.671053  
3,1,2341.613636  
3,1,2360.551630  
3,1,5205.000000  
3,1,2507.533784  
3,1,1551.039474  
3,1,13832.000000  
3,1,3198.333333  
3,1,4116.666667  
3,1,2460.221154  
3,1,2290.448980  
3,1,4973.933140  
3,1,10760.378049  
3,1,11659.011364  
3,1,2326.325581  
3,1,4034.072115  
3,1,3188.833333  
3,1,2964.125000  
3,1,4162.446809  
3,1,1617.900524  
3,1,12956.502242  
3,1,2083.620690  
3,1,2420.394737  
3,1,1643.899281  
3,1,1666.576389  
3,1,1588.890909  
3,1,3009.378676  
3,1,3568.827778  
3,1,4264.625000  
3,1,1616.562500  
3,1,1848.882812

3,1,7367.083333  
3,1,14052.936047  
3,1,3297.348958  
3,1,1926.340278  
3,1,2000.550000  
3,1,2397.916667  
3,1,21208.500000  
3,1,3149.091837  
3,1,2169.525000  
3,1,4143.683673  
3,1,1531.458333  
3,1,11068.717593  
3,1,2589.666667  
3,1,2501.106383  
3,1,9019.187500  
3,1,3327.452500  
3,1,2318.389535  
3,1,5947.725610  
3,1,11519.778646  
3,1,3530.736842  
3,1,2216.699468  
3,1,14407.000000  
3,1,5751.895833  
3,1,4296.000000  
3,1,25024.770833  
3,1,3430.776515  
3,1,6518.485000  
3,1,2394.238095  
3,1,2030.384615  
3,1,4177.964286  
3,1,3328.392045  
3,1,19077.934783  
3,1,7425.893750  
3,1,5185.886364  
3,1,1647.515625  
3,1,6025.621429  
3,1,2059.102564  
3,1,168308.866071  
3,1,1573.926630  
3,1,4086.852941  
3,1,14384.927632  
3,1,3528.352273  
3,1,10765.344595  
3,1,2914.017857  
3,1,3449.513021  
3,1,1757.571429  
3,1,4350.615385  
3,1,5619.625000  
3,1,1802.735099  
3,1,1925.046512  
3,1,2550.244318  
3,1,3350.474490  
3,1,2231.619792  
3,1,3273.285000  
3,1,3233.478261  
3,1,6232.921429  
3,1,2625.042553  
3,1,10893.815476  
3,1,2052.395349  
3,1,2637.798611  
3,1,3130.923077  
3,1,20695.640244  
3,1,2559.269231  
3,1,5103.717277  
3,1,2216.613636  
3,1,2379.916667

3,1,2887.571429  
3,1,3467.800926  
3,1,7050.904545  
3,1,17089.025943  
3,1,7224.206522  
3,1,2896.222222  
3,1,4706.781250  
3,1,4114.333333  
3,1,27591.000000  
3,1,5152.000000  
3,1,1630.524306  
3,1,19783.546512  
3,1,1830.452381  
3,1,2386.488372  
3,1,6301.814815  
3,1,7342.601852  
3,1,3962.722826  
3,1,1971.012500  
3,1,2293.942308  
3,1,2824.268750  
3,1,3242.468750  
3,1,14085.243056  
3,1,1792.048780  
3,1,16189.788462  
3,1,3018.145833  
3,1,1529.348837  
3,1,4058.875000  
3,1,4359.103723  
3,1,1712.661111  
3,1,3067.230469  
3,1,10194.666667  
3,1,2958.933824  
3,1,7783.864865  
3,1,164389.140625  
3,1,2733.100000  
3,1,14465.812500  
3,1,3859.231061  
3,1,1984.664634  
3,1,1861.552083  
3,1,6471.095000  
3,1,1519.077778  
3,1,1775.956522  
3,1,2736.427326  
3,1,2364.628676  
3,1,1703.750000  
3,1,2662.666667  
3,1,67197.318966  
3,1,2284.725000  
3,1,5551.500000  
3,1,2800.066667  
3,1,4604.880208  
3,1,6980.531250  
3,1,1926.357143  
3,1,1639.093750  
3,1,37330.510204  
3,1,5616.309659  
3,1,4021.389535  
3,1,3539.951923  
3,1,1764.807143  
3,1,1881.550000  
3,1,1926.570312  
3,1,1739.834239  
3,1,4838.203431  
3,1,7264.202128  
3,1,5318.916667  
3,1,2481.975000

3,1,2973.739286  
3,1,11407.569149  
3,1,2463.425000  
3,1,5176.094595  
3,1,4883.500000  
3,1,1885.848214  
3,1,3966.262255  
3,1,2918.670455  
3,1,3050.867647  
3,1,2681.520833  
3,1,22309.709302  
3,1,7636.818182  
3,1,5790.309659  
3,1,1627.848214  
3,1,3819.717391  
3,1,1666.786765  
3,1,23697.722656  
3,1,6311.483696  
3,1,1872.016304  
3,1,2337.603571  
3,1,64709.845000  
3,1,3755.418103  
3,1,2579.209302  
3,1,2097.937500  
3,1,3753.557927  
3,1,2153.208333  
3,1,120442.631410  
3,1,1893.269737  
3,1,2044.285714  
3,1,91648.590909  
3,1,101935.300000  
3,1,3312.930168  
3,1,13796.981707  
3,1,1826.000000  
3,1,2211.875000  
3,1,2319.090426  
3,1,1749.384211  
3,1,5465.375000  
3,1,2309.658537  
3,1,2247.978261  
3,1,3220.800000  
3,1,3313.017857  
3,1,3345.812500  
3,1,1744.602941  
3,1,96544.064286  
3,1,1779.305000  
3,1,4193.259434  
3,1,1653.903409  
3,1,2439.659722  
3,1,28672.418605  
3,1,2952.340000  
3,1,1528.445946  
3,1,1763.142857  
3,1,1690.296512  
3,1,2964.200000  
3,1,3408.033784  
3,1,2808.687500  
3,1,1532.875000  
3,1,4655.713415  
3,1,4134.211111  
3,1,2576.387755  
3,1,7734.063889  
3,1,8006.610119  
3,1,2708.285714  
3,1,8076.250000  
3,1,4382.242188

3,1,3682.338235  
3,1,3754.275735  
3,1,1952.562500  
3,1,15905.375000  
3,1,10661.350000  
3,1,4177.506757  
3,1,8888.728261  
3,1,2355.351190  
3,1,3348.243243  
3,1,3071.461310  
3,1,2760.567073  
3,1,7152.522321  
3,1,11270.846591  
3,1,24266.674658  
3,1,4503.256757  
3,1,2049.375000  
3,1,2062.154412  
3,1,1708.420213  
3,1,8779.575000  
3,1,1527.036364  
3,1,4645.272222  
3,1,3014.657258  
3,1,11871.812500  
3,1,5545.704225  
3,1,3194.406250  
3,1,1693.983108  
3,1,2161.477273  
3,1,6090.430233  
3,1,1650.494186  
3,1,16493.645833  
3,1,2568.852273  
3,1,2480.108696  
3,1,6078.921053  
3,1,2172.566176  
3,1,16628.484375  
3,1,1749.416667  
3,1,1738.013514  
3,1,15979.804878  
3,1,2494.353125  
3,1,8186.781250  
3,1,5775.410377  
3,1,4300.455128  
3,1,3293.710938  
3,1,2447.381944  
3,1,2882.487179  
3,1,90220.802632  
3,1,1665.125000  
3,1,2782.812500  
3,1,7055.257812  
3,1,1598.156250  
3,1,2736.510638  
3,1,6785.256757  
3,1,1652.087209  
3,1,2116.544643  
3,1,2421.953488  
3,1,4617.654070  
3,1,2049.625000  
3,1,7699.972222  
3,1,10566.392857  
3,1,4139.656250  
3,1,1899.530612  
3,1,19558.977500  
3,1,5067.200000  
3,1,8301.035714  
3,1,2936.127778  
3,1,2377.875000

3,1,8719.165441  
3,1,2778.983333  
3,1,3975.750000  
3,1,2765.533333  
3,1,3055.422222  
3,1,2362.684211  
3,1,100164.062500  
3,1,2599.689189  
3,1,4741.078125  
3,1,3562.068182  
3,1,18133.007812  
3,1,3934.404762  
3,1,3349.636905  
3,1,6969.279605  
3,1,2480.657051  
3,1,4258.154255  
3,1,1524.875000  
3,1,3574.303191  
3,1,4154.452381  
3,1,5588.735000  
3,1,4008.986111  
3,1,7186.856132  
3,1,1540.410256  
3,1,102009.720109  
3,1,5530.111111  
3,1,2998.677632  
3,1,2324.828947  
3,1,5900.875000  
3,1,2052.128378  
3,1,5897.104839  
3,1,1557.127660  
3,1,15758.754310  
3,1,1857.532895  
3,1,2186.611111  
3,1,4047.666667  
3,1,2718.604167  
3,1,61233.528846  
3,1,1591.403846  
3,1,4291.589674  
3,1,1590.479167  
3,1,1647.964286  
3,1,1735.519022  
3,1,10485.884615  
3,1,5641.989865  
3,1,2489.548913  
3,1,3548.636364  
3,1,1848.565217  
3,1,1995.312500  
3,1,1532.285714  
3,1,11774.570833  
3,1,7898.852500  
3,1,5308.602041  
3,1,2131.666667  
3,1,2946.435096  
3,1,7631.769231  
3,1,12208.875000  
3,1,17334.050000  
3,1,3651.234043  
3,1,2754.079787  
3,1,1929.964286  
3,1,1539.520833  
3,1,1668.424419  
3,1,6725.518293  
3,1,6606.695000  
3,1,12466.153226  
3,1,5763.817568

3,1,4222.087500  
3,1,3238.031250  
3,1,54725.333333  
3,1,2589.468750  
3,1,9536.195652  
3,1,2123.271739  
3,1,2040.651163  
3,1,5843.978261  
3,1,1800.026316  
3,1,7635.707500  
3,1,2603.587838  
3,1,1988.098837  
3,1,23990.687500  
3,1,3968.869565  
3,1,4960.250000  
3,1,8087.644531  
3,1,4112.107955  
3,1,57410.384146  
3,1,1807.707547  
3,1,1658.450000  
3,1,3620.678571  
3,1,3453.022727  
3,1,1854.622159  
3,1,2366.385870  
3,1,20453.822917  
3,1,2255.761905  
3,1,2611.008929  
3,1,1853.851190  
3,1,1920.701220  
3,1,2103.784091  
3,1,2077.468750  
3,1,2692.342105  
3,1,1854.906250  
3,1,33171.901316  
3,1,1771.858696  
3,1,3234.956522  
3,1,19757.583333  
3,1,1657.402778  
3,1,3118.485714  
3,1,7294.219512  
3,1,1726.275641  
3,1,103955.836806  
3,1,2724.428571  
3,1,3655.406915  
3,1,22407.166667  
3,1,4581.290541  
3,1,5627.896341  
3,1,2265.021739  
3,1,5386.606132  
3,1,2024.006944  
3,1,1792.250000  
3,1,2153.706522  
3,1,62374.230769  
3,1,3173.414773  
3,1,2876.966216  
3,1,16094.454787  
3,1,7093.090909  
3,1,1957.200000  
3,1,4076.500000  
3,1,3858.477564  
3,1,3762.867347  
3,1,3587.145833  
3,1,22771.552632  
3,1,1555.000000  
3,1,3796.541667  
3,1,6898.012500

3,1,1648.005952  
3,1,6417.263158  
3,1,1975.256410  
3,1,2595.697581  
3,1,7768.628205  
3,1,4690.553191  
3,1,4169.769231  
3,1,1516.408333  
3,1,2775.387097  
3,1,3994.583333  
3,1,2436.168605  
3,1,1592.973684  
3,1,144212.983108  
3,1,3941.274390  
3,1,3847.630952  
3,1,35304.377358  
3,1,5852.833333  
3,1,2016.411184  
3,1,3440.784722  
3,1,2613.746875  
3,1,1781.000000  
3,1,2845.706587  
3,1,2577.520833  
3,1,1724.729651  
3,1,1556.125000  
3,1,5302.277344  
3,1,41345.625000  
3,1,2569.003125  
3,1,4292.518293  
3,1,3781.913043  
3,1,4002.975610  
3,1,2271.546429  
3,1,2174.478261  
3,1,7903.886029  
3,1,2439.000000  
3,1,1828.542683  
3,1,2076.280000  
3,1,8114.500000  
3,1,16108.127778  
3,1,1650.400000  
3,1,2229.896875  
3,1,2073.341463  
3,1,1801.142857  
3,1,1652.257576  
3,1,1641.978261  
3,1,3538.890625  
3,1,6216.871951  
3,1,2176.771739  
3,1,1560.444444  
3,1,3340.176630  
3,1,8675.395833  
3,1,1785.645349  
3,1,26747.312500  
3,1,3224.842391  
3,1,16538.189189  
3,1,12779.857143  
3,1,2852.333333  
3,1,7403.536765  
3,1,1573.962209  
3,1,3733.500000  
3,1,6611.208333  
3,1,4024.500000  
3,1,2599.644444  
3,1,5601.392045  
3,1,11220.558511  
3,1,1960.750000

3,1,2148.108333  
3,1,3255.500000  
3,1,12558.134615  
3,1,1627.377907  
3,1,2107.668605  
3,1,63848.164634  
3,1,3251.549342  
3,1,2548.424419  
3,1,2194.121875  
3,1,3377.732955  
3,1,2437.609756  
3,1,4848.142857  
3,1,2754.494048  
3,1,1928.909091  
3,1,1672.631944  
3,1,3178.467742  
3,1,10050.575000  
3,1,2494.462500  
3,1,10109.425781  
3,1,2947.891304  
3,1,3383.857143  
3,1,1885.057927  
3,1,5466.062500  
3,1,6683.328125  
3,1,4634.383333  
3,1,2566.151515  
3,1,1768.857143  
3,1,1523.500000  
3,1,1547.232558  
3,1,14831.112245  
3,1,32999.691406  
3,1,11172.537234  
3,1,30929.676471  
3,1,2185.358974  
3,1,6046.048780  
3,1,14848.143939  
3,1,18259.265957  
3,1,11822.111111  
3,1,1516.692308  
3,1,2874.621094  
3,1,25440.690789  
3,1,3120.168605  
3,1,8033.651596  
3,1,9181.416667  
3,1,3395.000000  
3,1,16046.324324  
3,1,2385.227273  
3,1,2185.848837  
3,1,6725.852273  
3,1,7418.833333  
3,1,3003.750000  
3,1,1625.837209  
3,1,10192.828125  
3,1,7106.714286  
3,1,162228.306818  
3,1,1746.890244  
3,1,1735.871795  
3,1,12680.291667  
3,1,2588.294118  
3,1,4407.925000  
3,1,2521.000000  
3,1,3225.539062  
3,1,2675.503906  
3,1,1602.188953  
3,1,1830.208333  
3,1,2372.018382

3,1,2674.482759  
3,1,1543.154762  
3,1,1781.750000  
3,1,1880.690972  
3,1,12024.414474  
3,1,3102.889423  
3,1,18099.564103  
3,1,3551.432692  
3,1,2830.176471  
3,1,2069.183140  
3,1,3949.676136  
3,1,25535.293919  
3,1,4481.676471  
3,1,1704.868421  
3,1,2609.166667  
3,1,122760.833333  
3,1,129414.687500  
3,1,1707.731707  
3,1,21610.756757  
3,1,8958.833333  
3,1,2645.011364  
3,1,1949.939024  
3,1,2125.500000  
3,1,1777.718750  
3,1,8863.695513  
3,1,1532.242857  
3,1,24223.536585  
3,1,89089.417614  
3,1,57344.409722  
3,1,2845.241935  
3,1,16201.000000  
3,1,1659.040323  
3,1,5627.109375  
3,1,1987.500000  
3,1,15863.448529  
3,1,15387.974265  
3,1,1598.571429  
3,1,2749.833333  
3,1,7657.610577  
3,1,1568.982955  
3,1,3731.861111  
3,1,17652.386029  
3,1,2870.389706  
3,1,1572.256579  
3,1,113251.068493  
3,1,6226.678571  
3,1,3699.087766  
3,1,45021.348684  
3,1,2662.505435  
3,1,2202.263889  
3,1,1592.281977  
3,1,7623.837838  
3,1,110909.597561  
3,1,11786.500000  
3,1,2612.609375  
3,1,4266.741071  
3,1,6769.750000  
3,1,1609.858974  
3,1,36799.937500  
3,1,83091.000000  
3,1,1762.359375  
3,1,1537.220930  
3,1,1971.902439  
3,1,2671.398438  
3,1,2065.290541  
3,1,3072.151163

3,1,2575.481707  
3,1,5819.306250  
3,1,2026.500000  
3,1,2487.047619  
3,1,7793.735294  
3,1,8584.657258  
3,1,2183.473684  
3,1,2753.550000  
3,1,3614.222222  
3,1,2344.239796  
3,1,1643.395349  
3,1,11325.948529  
3,1,6862.860465  
3,1,1692.693750  
3,1,5861.666667  
3,1,5060.217742  
3,1,3523.250000  
3,1,3412.235294  
3,1,1981.000000  
3,1,2136.357143  
3,1,9418.967742  
3,1,5347.927419  
3,1,2305.617647  
3,1,1517.425000  
3,1,1892.200000  
3,1,2597.645833  
3,1,62534.467105  
3,1,19442.954545  
3,1,7246.857143  
3,1,4746.211538  
3,1,2253.562500  
3,1,2564.847561  
3,1,2975.031250  
3,1,2601.226744  
3,1,5894.723485  
3,1,1556.198171  
3,1,1695.382353  
3,1,2692.330189  
3,1,8369.663462  
3,1,1541.000000  
3,1,7412.448718  
3,1,4184.166667  
3,1,1956.191667  
3,1,2100.020833  
3,1,5773.109756  
3,1,3002.890625  
3,1,1951.864362  
3,1,4239.869318  
3,1,3310.776042  
3,1,3078.598684  
3,1,4103.552326  
3,1,1571.244792  
3,1,1915.375000  
3,1,4205.278571  
3,1,1546.267857  
3,1,1593.973684  
3,1,2113.462838  
3,1,68463.319149  
3,1,3098.182292  
3,1,2181.147727  
3,1,2384.702381  
3,1,7561.312500  
3,1,2860.812500  
3,1,2446.781250  
3,1,2130.214286  
3,1,1839.222222

3,1,2985.277228  
3,1,1555.621622  
3,1,1784.543605  
3,1,12839.785714  
3,1,1505.266667  
3,1,6181.145833  
3,1,2070.865385  
3,1,1642.202128  
3,1,2982.000000  
3,1,4153.198864  
3,1,4362.648438  
3,1,3066.482955  
3,1,2778.625000  
3,1,1675.500000  
3,1,2470.583333  
3,1,3522.750000  
3,1,2769.171875  
3,1,8305.858974  
3,1,17283.266304  
3,1,2201.384615  
3,1,2255.445652  
3,1,20385.833333  
3,1,22013.062500  
3,1,23102.565789  
3,1,18937.054054  
3,1,2097.509375  
3,1,2061.821429  
3,1,1769.619318  
3,1,22206.515625  
3,1,3270.215116  
3,1,78576.024390  
3,1,1518.228723  
3,1,1604.883929  
3,1,2681.110119  
3,1,23536.078947  
3,1,3904.260870  
3,1,3597.234043  
3,1,1892.675676  
3,1,2690.548780  
3,1,1574.350000  
3,1,2223.288043  
3,1,3523.714286  
3,1,2272.774194  
3,1,2010.533333  
3,1,1640.930851  
3,1,3882.707317  
3,1,2818.600000  
3,1,86880.310976  
3,1,7483.368750  
3,1,18407.353261  
3,1,2448.319767  
3,1,1842.057692  
3,1,22057.891892  
3,1,2806.469697  
3,1,32676.578947  
3,1,2162.586207  
3,1,3788.558824  
3,1,93656.554054  
3,1,6414.926829  
3,1,90560.645833  
3,1,1607.180851  
3,1,14088.384146  
3,1,1878.527778  
3,1,21368.182065  
3,1,1529.829268  
3,1,2217.525000

3,1,3693.203125  
3,1,12127.279255  
3,1,14345.542683  
3,1,2004.569767  
3,1,6653.979167  
3,1,5272.325000  
3,1,8678.674419  
3,1,2858.600000  
3,1,2878.440476  
3,1,9703.279762  
3,1,19279.750000  
3,1,1755.977941  
3,1,2591.315217  
3,1,2441.544872  
3,1,2248.231250  
3,1,32152.470238  
3,1,2875.562500  
3,1,4626.335938  
3,1,18976.431818  
3,1,8997.057692  
3,1,12126.558824  
3,1,2716.121212  
3,1,1653.706250  
3,1,1927.426471  
3,1,4570.065625  
3,1,7071.375000  
3,1,13506.697917  
3,1,2778.934783  
3,1,2401.812500  
3,1,1555.148026  
3,1,2012.845238  
3,1,4448.375000  
3,1,3150.188830  
3,1,1632.838235  
3,1,1793.916667  
3,1,1865.125000  
3,1,2470.425532  
3,1,2588.500000  
3,1,1778.766447  
3,1,2534.018382  
3,1,1595.285714  
3,1,2482.051471  
3,1,3898.587500  
3,1,2350.537500  
3,1,2922.159091  
3,1,3465.064024  
3,1,1575.941176  
3,1,4883.268293  
3,1,1648.580357  
3,1,17124.385714  
3,1,15358.857143  
3,1,2468.693878  
3,1,4014.034314  
3,1,1509.044355  
3,1,4223.468750  
3,1,83971.875000  
3,1,3947.943182  
3,1,2292.283088  
3,1,2867.750000  
3,1,2980.258065  
3,1,3781.587209  
3,1,1761.738372  
3,1,11424.861842  
3,1,6835.750000  
3,1,2817.073529  
3,1,2601.000000

3,1,16039.389535  
3,1,2182.666667  
3,1,1887.187500  
3,1,6576.067500  
3,1,3044.086111  
3,1,4256.445313  
3,1,3258.884146  
3,1,1681.279070  
3,1,2225.436170  
3,1,2311.689189  
3,1,1637.288194  
3,1,26734.012195  
3,1,2759.583333  
3,1,1788.714286  
3,1,3814.391026  
3,1,2206.847826  
3,1,102889.812500  
3,1,4100.970000  
3,1,18223.009868  
3,1,17436.311111  
3,1,1503.812500  
3,1,4374.141892  
3,1,7597.923077  
3,1,8480.191860  
3,1,4265.934211  
3,1,3560.151163  
3,1,5331.125000  
3,1,4717.562500  
3,1,16300.952830  
3,1,2147.328125  
3,1,5025.977273  
3,1,9182.494898  
3,1,30758.058511  
3,1,9406.103261  
3,1,26507.931034  
3,1,15767.061224  
3,1,2985.704545  
3,1,2640.075000  
3,1,3285.387500  
3,1,5094.321429  
3,1,3326.994048  
3,1,3286.497500  
3,1,6583.078125  
3,1,9262.149390  
3,1,5150.348837  
3,1,3598.782609  
3,1,178610.327869  
3,1,5760.557927  
3,1,11571.449405  
3,1,2568.370098  
3,1,45480.786458  
3,1,2217.666667  
3,1,2629.695122  
3,1,1948.536184  
3,1,6743.270408  
3,1,25906.316406  
3,1,4009.622340  
3,1,6648.928191  
3,1,4126.044872  
3,1,22907.488889  
3,1,3773.423469  
3,1,2187.127660  
3,1,6562.558333  
3,1,9401.043269  
3,1,14307.062500  
3,1,2703.619048

3,1,1743.542553  
3,1,1508.757576  
3,1,2583.783333  
3,1,1634.740196  
3,1,1632.105114  
3,1,2408.333333  
3,1,8725.991279  
3,1,2255.089844  
3,1,2554.010417  
3,1,11156.062500  
3,1,3796.809659  
3,1,4701.000000  
3,1,3777.619792  
3,1,2359.788043  
3,1,2606.166667  
3,1,25091.415094  
3,1,3530.322368  
3,1,2115.740196  
3,1,1937.956395  
3,1,3590.153409  
3,1,3035.732143  
3,1,1986.193717  
3,1,4544.346354  
3,1,7274.414634  
3,1,2646.456250  
3,1,14330.814516  
3,1,7972.497024  
3,1,8033.857843  
3,1,5470.268293  
3,1,4572.813830  
3,1,2643.680851  
3,1,1546.340426  
3,1,3590.955357  
3,1,8756.883929  
3,1,3053.680556  
3,1,4083.222561  
3,1,14495.419118  
3,1,1780.807692  
3,1,1992.750000  
3,1,2089.148649  
3,1,2129.981818  
3,1,1748.437500  
3,1,2731.664286  
3,1,8147.589286  
3,1,2725.674419  
3,1,2246.537500  
3,1,3347.941176  
3,1,1937.170732  
3,1,2833.858333  
3,1,8719.398256  
3,1,3189.088068  
3,1,7000.315476  
3,1,3200.219512  
3,1,6577.825000  
3,1,1608.434211  
3,1,6212.194767  
3,1,2904.741071  
3,1,3309.080882  
3,1,1744.530612  
3,1,34565.991071  
3,1,2418.479592  
3,1,8023.817308  
3,1,3535.117925  
3,1,24134.500000  
3,1,67629.804878  
3,1,2893.925532

3,1,2845.557927  
3,1,5408.638158  
3,1,22410.104167  
3,1,7977.638889  
3,1,3246.901163  
3,1,3764.718750  
3,1,6250.022727  
3,1,1555.551829  
3,1,5613.179487  
3,1,2970.791667  
3,1,3924.257812  
3,1,2539.058594  
3,1,4664.121951  
3,1,2602.753086  
3,1,4335.050000  
3,1,43739.000000  
3,1,15160.595238  
3,1,1566.631757  
3,1,3668.913462  
3,1,1599.247283  
3,1,2530.076923  
3,1,5139.595238  
3,1,1633.403846  
3,1,55710.600610  
3,1,1559.764151  
3,1,2294.000000  
3,1,2686.881720  
3,1,4485.142857  
3,1,5574.302083  
3,1,2197.705128  
3,1,1757.338235  
3,1,1919.107955  
3,1,5406.772727  
3,1,1784.926471  
3,1,4107.608696  
3,1,7691.887195  
3,1,10009.682927  
3,1,6299.312500  
3,1,5082.217391  
3,1,3184.062500  
3,1,5040.225694  
3,1,1700.300532  
3,1,2639.938679  
3,1,2035.971591  
3,1,3294.183824  
3,1,1755.695652  
3,1,5458.200000  
3,1,4214.678191  
3,1,3611.940217  
3,1,20689.228571  
3,1,2288.296875  
3,1,9530.726190  
3,1,1813.086538  
3,1,3056.265625  
3,1,2222.850610  
3,1,3358.765625  
3,1,8190.300532  
3,1,11314.462185  
3,1,1686.878788  
3,1,2896.750000  
3,1,4435.222826  
3,1,6384.203947  
3,1,56574.216216  
3,1,1700.296296  
3,1,3963.113636  
3,1,2122.903646

3,1,7752.333333  
3,1,21742.169872  
3,1,3199.000000  
3,1,1876.380319  
3,1,1719.105114  
3,1,1686.649390  
3,1,2075.662162  
3,1,1730.866667  
3,1,4534.105769  
3,1,1546.877358  
3,1,23269.859375  
3,1,2305.366279  
3,1,5758.006098  
3,1,4645.679245  
3,1,2233.795213  
3,1,3048.360294  
3,1,1549.726744  
3,1,2768.255814  
3,1,1947.213415  
3,1,2781.645349  
3,1,3169.936275  
3,1,1923.470238  
3,1,1932.510638  
3,1,6877.204545  
3,1,2515.913462  
3,1,1926.575758  
3,1,2478.238372  
3,1,1680.657895  
3,1,2535.611111  
3,1,3833.071429  
3,1,5096.503676  
3,1,2579.366667  
3,1,5843.146552  
3,1,5050.428571  
3,1,4890.294872  
3,1,3381.625000  
3,1,3890.210526  
3,1,20829.798780  
3,1,2544.968750  
3,1,2639.772222  
3,1,5964.428571  
3,1,7273.456522  
3,1,2217.007353  
3,1,9270.053571  
3,1,81814.346939  
3,1,12246.596591  
3,1,7184.743750  
3,1,2294.674419  
3,1,2220.149457  
3,1,3682.628049  
3,1,4108.350543  
3,1,2870.670000  
3,1,2894.608696  
3,1,1973.647059  
3,1,1722.637500  
3,1,1530.597826  
3,1,2724.261029  
3,1,4989.101852  
3,1,15920.456522  
3,1,2661.443750  
3,1,9369.065789  
3,1,22759.014151  
3,1,1731.794643  
3,1,3704.142857  
3,1,1587.420732  
3,1,2391.266892

3,1,2170.656250  
3,1,18746.366667  
3,1,2952.825000  
3,1,2017.487500  
3,1,3945.581250  
3,1,7439.588235  
3,1,8017.458333  
3,1,5568.000000  
3,1,4702.035714  
3,1,1876.590116  
3,1,1546.007979  
3,1,6801.490909  
3,1,12140.785714  
3,1,2149.411585  
3,1,6546.278846  
3,1,2668.346354  
3,1,6132.775862  
3,1,2121.536184  
3,1,1551.184211  
3,1,5398.046875  
3,1,15945.257353  
3,1,4286.636364  
3,1,2414.533333  
3,1,5051.412791  
3,1,10696.181818  
3,1,1881.930851  
3,1,1602.602941  
3,1,12543.260870  
3,1,2957.461538  
3,1,29769.696429  
3,1,2454.635135  
3,1,3177.857143  
3,1,32196.443452  
3,1,2451.885204  
3,1,1506.693878  
3,1,60825.333333  
3,1,4846.548913  
3,1,2410.720109  
3,1,5164.678977  
3,1,10541.494186  
3,1,2370.437500  
3,1,1719.428571  
3,1,2298.548780  
3,1,1530.931250  
3,1,17131.479167  
3,1,1986.388889  
3,1,6142.157609  
3,1,2671.590000  
3,1,1728.403846  
3,1,2778.306818  
3,1,2670.100000  
3,1,4952.187500  
3,1,6484.582317  
3,1,21376.113372  
3,1,2868.150000  
3,1,2011.044118  
3,1,2418.598214  
3,1,4363.473214  
3,1,4418.131757  
3,1,7964.820513  
3,1,2494.113636  
3,1,35939.750000  
3,1,13522.743056  
3,1,2093.573171  
3,1,25435.750000  
3,1,2795.000000

3,1,103893.208333  
3,1,1692.726744  
3,1,2079.297619  
3,1,5403.059524  
3,1,19022.638158  
3,1,9037.385870  
3,1,1562.594595  
3,1,3015.500000  
3,1,16200.735294  
3,1,3546.837838  
3,1,3504.488971  
3,1,23953.584302  
3,1,1888.178571  
3,1,1900.231707  
3,1,2854.779070  
3,1,2816.200000  
3,1,2378.875000  
3,1,77400.027027  
3,1,13167.605000  
3,1,2668.000000  
3,1,1965.920455  
3,1,4089.900000  
3,1,23856.846154  
3,1,4222.038043  
3,1,6221.037500  
3,1,37228.850000  
3,1,4870.222222  
3,1,3437.903846  
3,1,4586.730769  
3,1,2090.000000  
3,1,4061.244186  
3,1,5955.642857  
3,1,9221.181818  
3,1,5393.250000  
3,1,6076.537500  
3,1,13700.285714  
3,1,1667.666667  
3,1,3570.678571  
3,1,14344.011364  
3,1,5092.970588  
3,1,3848.175532  
3,1,2405.170213  
3,1,2251.352941  
3,1,3974.685897  
3,1,25412.184211  
3,1,1737.540865  
3,1,8195.250000  
3,1,3851.347222  
3,1,1556.517857  
3,1,31606.268293  
3,1,1632.676282  
3,1,3985.318182  
3,1,2734.480769  
3,1,2576.386364  
3,1,47548.826923  
3,1,76845.837209  
3,1,47843.491071  
3,1,3603.106383  
3,1,2464.206522  
3,1,2180.386029  
3,1,3423.882353  
3,1,3003.746988  
3,1,87124.184375  
3,1,2988.325000  
3,1,5017.486111  
3,1,6467.768293

3,1,1760.948864  
3,1,2307.605114  
3,1,3839.461538  
3,1,6286.840909  
3,1,45249.733333  
3,1,11217.777778  
3,1,2091.989130  
3,1,2645.723684  
3,1,18878.250000  
3,1,2010.800000  
3,1,1524.048780  
3,1,1866.116477  
3,1,2078.065625  
3,1,5244.837121  
3,1,1806.948171  
3,1,5290.351351  
3,1,4867.046875  
3,1,1763.469388  
3,1,5013.013889  
3,1,5305.144231  
3,1,148832.814189  
3,1,7896.494048  
3,1,12375.687500  
3,1,2005.837838  
3,1,61133.951923  
3,1,1801.343750  
3,1,4666.155556  
3,1,9427.628125  
3,1,16456.260135  
3,1,3516.479167  
3,1,3065.478448  
3,1,4183.865385  
3,1,4462.616279  
3,1,1552.025641  
3,1,2100.187500  
3,1,4677.838710  
3,1,8547.723684  
3,1,27296.265385  
3,1,1725.982143  
3,1,190061.084459  
3,1,2985.162234  
3,1,9297.267296  
3,1,3200.710938  
3,1,2223.731707  
3,1,1553.229167  
3,1,2424.875000  
3,1,4887.416667  
3,1,1985.487179  
3,1,4537.384615  
3,1,2448.750000  
3,1,1617.916667  
3,1,1803.608333  
3,1,35007.106383  
3,1,1783.786164  
3,1,2580.275000  
3,1,1634.515244  
3,1,4151.709677  
3,1,3786.551020  
3,1,4015.144231  
3,1,1978.712500  
3,1,2394.172414  
3,1,3685.613636  
3,1,4353.577703  
3,1,2999.125000  
3,1,24464.266667  
3,1,2840.205882

3,1,9380.321429  
3,1,3446.033784  
3,1,2297.969466  
3,1,34438.011905  
3,1,1510.392857  
3,1,1840.424419  
3,1,1983.375000  
3,1,2266.963415  
3,1,5085.741935  
3,1,1989.664474  
3,1,63711.000000  
3,1,5997.616935  
3,1,1569.937500  
3,1,7144.937500  
3,1,5466.878049  
3,1,2815.211538  
3,1,3258.800000  
3,1,3451.595745  
3,1,8012.081081  
3,1,3915.683824  
3,1,2705.541667  
3,1,7370.257812  
3,1,12647.484848  
3,1,2121.268293  
3,1,27034.103261  
3,1,2657.417763  
3,1,6166.774194  
3,1,2006.362805  
3,1,14138.019231  
3,1,1666.794118  
3,1,6609.715909  
3,1,12980.235294  
3,1,3031.437500  
3,1,16508.669355  
3,1,1798.131250  
3,1,33412.143836  
3,1,8754.665323  
3,1,1976.317073  
3,1,2837.260417  
3,1,4156.028846  
3,1,2867.212500  
3,1,2063.946429  
3,1,5473.062500  
3,1,15120.838710  
3,1,13633.454545  
3,1,6354.018750  
3,1,2247.308824  
3,1,8004.033333  
3,1,5652.125000  
3,1,13958.625000  
3,1,4211.408333  
3,1,1674.175532  
3,1,2323.139706  
3,1,7245.320513  
3,1,8461.511719  
3,1,2459.196429  
3,1,23218.006098  
3,1,1729.355263  
3,1,9593.256410  
3,1,1547.701389  
3,1,2669.090000  
3,1,2673.887097  
3,1,6239.604167  
3,1,6194.496711  
3,1,3818.735294  
3,1,2083.411458

3,1,1503.884259  
3,1,5405.343750  
3,1,4340.500000  
3,1,1671.114286  
3,1,3517.786458  
3,1,3983.416667  
3,1,1897.035714  
3,1,1973.950000  
3,1,4944.515152  
3,1,2857.375000  
3,1,11430.344444  
3,1,2794.521739  
3,1,135429.559524  
3,1,1579.007692  
3,1,2037.696429  
3,1,1524.744318  
3,1,5133.048077  
3,1,2574.634615  
3,1,1519.173913  
3,1,6428.744681  
3,1,1589.823529  
3,1,1884.142857  
3,1,1690.829787  
3,1,1754.163462  
3,1,1709.437500  
3,1,3972.815476  
3,1,2888.271341  
3,1,25687.651163  
3,1,1517.750000  
3,1,2842.850610  
3,1,3816.457317  
3,1,3042.741935  
3,1,2609.000000  
3,1,2311.946970  
3,1,2773.871094  
3,1,2237.041667  
3,1,1723.365385  
3,1,2296.312500  
3,1,1913.576087  
3,1,2853.131148  
3,1,6329.019737  
3,1,1637.258152  
3,1,4150.100543  
3,1,3690.857143  
3,1,1735.812500  
3,1,22732.438776  
3,1,4087.032407  
3,1,12207.102273  
3,1,4541.645161  
3,1,5170.630435  
3,1,5937.546053  
3,1,7287.128049  
3,1,5955.728261  
3,1,2465.520161  
3,1,3268.329545  
3,1,17809.000000  
3,1,18755.825000  
3,1,8267.700000  
3,1,1930.428571  
3,1,6443.961039  
3,1,2309.982558  
3,1,1919.809896  
3,1,3038.883929  
3,1,5656.180556  
3,1,17902.157895  
3,1,2223.059524

3,1,14948.763514  
3,1,1764.654891  
3,1,67780.687500  
3,1,2615.531250  
3,1,3902.172297  
3,1,2836.375000  
3,1,14309.523810  
3,1,2262.744681  
3,1,2813.415625  
3,1,3020.236413  
3,1,1788.380952  
3,1,2743.125000  
3,1,20386.406250  
3,1,4804.953125  
3,1,1521.417857  
3,1,5571.000000  
3,1,3001.719697  
3,1,2711.229167  
3,1,2909.226190  
3,1,2508.375000  
3,1,3353.978261  
3,1,4324.527778  
3,1,2047.527778  
3,1,24883.290441  
3,1,7488.637500  
3,1,44804.156250  
3,1,5511.148438  
3,1,4002.250000  
3,1,1761.651786  
3,1,6646.075000  
3,1,6705.194853  
3,1,1716.042553  
3,1,3432.696970  
3,1,158321.779070  
3,1,5781.357143  
3,1,8581.335366  
3,1,42162.724359  
3,1,4211.942073  
3,1,17213.563725  
3,1,3051.250000  
3,1,4051.898649  
3,1,2337.352273  
3,1,2102.714286  
3,1,15066.093750  
3,1,2932.710526  
3,1,1989.381757  
3,1,1786.265625  
3,1,2301.804878  
3,1,1974.344697  
3,1,1689.534091  
3,1,3079.150000  
3,1,1537.262500  
3,1,2054.050595  
3,1,3005.513587  
3,1,2997.285714  
3,1,2029.792683  
3,1,3217.854167  
3,1,38616.125000  
3,1,2756.882353  
3,1,2127.118902  
3,1,3506.047222  
3,1,8792.464844  
3,1,3168.888889  
3,1,15037.031250  
3,1,2805.785714  
3,1,8079.081395

3,1,2018.378676  
3,1,2398.033784  
3,1,9648.580645  
3,1,1722.500000  
3,1,99932.734375  
3,1,16912.230769  
3,1,1822.381410  
3,1,3155.877660  
3,1,1608.791667  
3,1,1812.054054  
3,1,1889.924242  
3,1,3384.361413  
3,1,1717.818182  
3,1,1923.750000  
3,1,36020.517361  
3,1,1644.619792  
3,1,1776.889535  
3,1,2708.241935  
3,1,2142.922222  
3,1,1519.863095  
3,1,1534.111111  
3,1,1705.187500  
3,1,5079.814103  
3,1,2568.475610  
3,1,2647.923077  
3,1,10252.707237  
3,1,6135.668919  
3,1,10813.090909  
3,1,1855.444444  
3,1,17534.760000  
3,1,1849.195122  
3,1,2073.542857  
3,1,4184.942308  
3,1,42735.701613  
3,1,3219.448529  
3,1,21572.404255  
3,1,2258.764706  
3,1,1741.946429  
3,1,21443.415541  
3,1,14652.221154  
3,1,4806.553030  
3,1,11241.391304  
3,1,3621.047619  
3,1,5063.125000  
3,1,1976.888514  
3,1,13067.652439  
3,1,2503.176829  
3,1,3251.650000  
3,1,3531.710937  
3,1,2452.625000  
3,1,1826.042614  
3,1,2844.444444  
3,1,1767.756410  
3,1,2195.361702  
3,1,3667.209677  
3,1,3517.058824  
3,1,15430.082143  
3,1,1722.058140  
3,1,86713.322368  
3,1,1784.195946  
3,1,3770.594388  
3,1,1787.524194  
3,1,1632.333333  
3,1,2720.596774  
3,1,3174.265625  
3,1,5531.694444

3,1,6051.575000  
3,1,7779.666667  
3,1,1976.635714  
3,1,1675.656977  
3,1,2356.239130  
3,1,3741.500000  
3,1,2717.767857  
3,1,3079.617187  
3,1,3244.730114  
3,1,3610.418750  
3,1,10871.215426  
3,1,5746.383721  
3,1,6065.187500  
3,1,3050.980000  
3,1,3122.315789  
3,1,6357.266667  
3,1,2525.958333  
3,1,4284.252778  
3,1,2974.915000  
3,1,2283.142857  
3,1,2555.122642  
3,1,41503.613971  
3,1,4780.261111  
3,1,1589.705882  
3,1,9289.109756  
3,1,1702.365385  
3,1,99658.333333  
3,1,1530.700980  
3,1,4308.201220  
3,1,17544.833333  
3,1,9119.537736  
3,1,3595.015625  
3,1,1601.660256  
3,1,2983.849246  
3,1,1892.425000  
3,1,1697.833333  
3,1,1808.643382  
3,1,1605.545455  
3,1,2393.776536  
3,1,2092.567839  
3,1,3307.184783  
3,1,3269.125000  
3,1,1620.388889  
3,1,10151.986842  
3,1,3970.291667  
3,1,1902.347826  
3,1,22521.750000  
3,1,2423.395349  
3,1,1719.611111  
3,1,19061.835227  
3,1,9213.659091  
3,1,3047.919118  
3,1,2098.517857  
3,1,2037.425676  
3,1,5855.034091  
3,1,3448.662500  
3,1,5926.847222  
3,1,2608.892045  
3,1,3010.182927  
3,1,7083.625000  
3,1,3047.211538  
3,1,47643.062500  
3,1,1792.257576  
3,1,12178.764706  
3,1,3866.122222  
3,1,5669.366935

3,1,2599.284091  
3,1,16920.555921  
3,1,2328.833333  
3,1,1752.465909  
3,1,2811.982143  
3,1,4840.011905  
3,1,3511.400000  
3,1,36114.272059  
3,1,7670.125000  
3,1,15360.196721  
3,1,1689.593750  
3,1,2434.352941  
3,1,5126.522059  
3,1,12289.180556  
3,1,5349.691176  
3,1,23497.863636  
3,1,2191.868056  
3,1,1673.343750  
3,1,4314.614130  
3,1,5323.191860  
3,1,1731.802083  
3,1,3511.245000  
3,1,11968.657407  
3,1,9198.893939  
3,1,3906.929348  
3,1,142623.364583  
3,1,14479.975000  
3,1,1900.136364  
3,1,1744.500000  
3,1,1926.317708  
3,1,7182.400000  
3,1,2287.000000  
3,1,4885.540373  
3,1,3924.638743  
3,1,7906.470588  
3,1,2043.983553  
3,1,1809.842105  
3,1,3043.154891  
3,1,10646.977941  
3,1,4599.897059  
3,1,1906.250000  
3,1,1882.420455  
3,1,26665.562500  
3,1,3609.645833  
3,1,46313.951299  
3,1,8816.946429  
3,1,4203.000000  
3,1,4840.669271  
3,1,4094.761628  
3,1,33232.687500  
3,1,1704.907258  
3,1,2757.884146  
3,1,1897.145833  
3,1,1976.037736  
3,1,1557.696970  
3,1,5955.380682  
3,1,6647.534091  
3,1,3919.656977  
3,1,16114.520833  
3,1,78320.050000  
3,1,4647.239865  
3,1,4277.371429  
3,1,4771.760000  
3,1,3231.146635  
3,1,2107.666667  
3,1,2297.729592

3,1,2037.702381  
3,1,6075.425532  
3,1,3794.908163  
3,1,3683.388889  
3,1,7815.841146  
3,1,4806.814189  
3,1,9671.570652  
3,1,1598.822917  
3,1,2936.345588  
3,1,2708.945312  
3,1,2091.660714  
3,1,7495.534091  
3,1,10728.797794  
3,1,4263.000000  
3,1,2302.958861  
3,1,50879.848404  
3,1,1611.949324  
3,1,2980.312500  
3,1,9007.666667  
3,1,3341.842105  
3,1,3268.842742  
3,1,8596.520000  
3,1,6016.175847  
3,1,7385.325000  
3,1,2693.509615  
3,1,6972.630208  
3,1,2045.015464  
3,1,1844.342742  
3,1,2450.676829  
3,1,6497.604167  
3,1,7987.884615  
3,1,1897.984043  
3,1,5641.000000  
3,1,8831.312500  
3,1,3139.153846  
3,1,1730.979275  
3,1,19006.713415  
3,1,4345.648936  
3,1,20911.093750  
3,1,2261.535714  
3,1,1973.817857  
3,1,4208.700535  
3,1,2002.208609  
3,1,2154.809524  
3,1,1709.761628  
3,1,2071.590000  
3,1,7502.975806  
3,1,4442.827586  
3,1,3278.932292  
3,1,3523.423913  
3,1,6714.896739  
3,1,2290.025862  
3,1,11090.343750  
3,1,1810.933333  
3,1,56534.035714  
3,1,2148.316860  
3,1,11394.357558  
3,1,39224.900000  
3,1,5432.052632  
3,1,3550.071429  
3,1,4305.633333  
3,1,47781.692308  
3,1,2668.768617  
3,1,1741.194767  
3,1,2327.666667  
3,1,15061.580000

3,1,3196.875000  
3,1,2227.312500  
3,1,1753.352500  
3,1,7052.005000  
3,1,9711.090909  
3,1,3194.500000  
3,1,10193.526316  
3,1,7473.333333  
3,1,1670.028571  
3,1,1637.701087  
3,1,9368.961735  
3,1,6778.857143  
3,1,6599.675926  
3,1,1732.839744  
3,1,10790.395833  
3,1,7954.210526  
3,1,7415.854167  
3,1,1605.500000  
3,1,26807.426282  
3,1,20530.957317  
3,1,1500.666667  
3,1,1894.528409  
3,1,2423.714286  
3,1,2580.625000  
3,1,1870.476190  
3,1,3334.854167  
3,1,6078.162500  
3,1,2238.083333  
3,1,1673.240385  
3,1,4055.125000  
3,1,11470.178571  
3,1,4040.669540  
3,1,1891.808824  
3,1,1614.583333  
3,1,1822.844737  
3,1,3692.639881  
3,1,3779.671610  
3,1,15031.246429  
3,1,2667.756757  
3,1,6283.910714  
3,1,1873.986413  
3,1,1802.090909  
3,1,7145.262019  
3,1,6815.507812  
3,1,2180.431452  
3,1,2799.397849  
3,1,4192.604167  
3,1,2784.584239  
3,1,4238.896635  
3,1,2574.388889  
3,1,4950.459091  
3,1,2081.546053  
3,1,1636.843750  
3,1,2208.348837  
3,1,6839.086957  
3,1,1759.194444  
3,1,5109.090000  
3,1,5143.840426  
3,1,3133.190625  
3,1,2694.394737  
3,1,2752.840909  
3,1,10359.193750  
3,1,27115.228571  
3,1,1663.164634  
3,1,22156.750000  
3,1,13866.306818

3,1,2311.105114  
3,1,4188.583770  
3,1,2069.000000  
3,1,4350.372642  
3,1,1959.625000  
3,1,3649.743590  
3,1,1758.381250  
3,1,126959.817568  
3,1,1940.707317  
3,1,1743.846154  
3,1,3536.991667  
3,1,6185.673729  
3,1,8289.750000  
3,1,1683.161290  
3,1,5338.976562  
3,1,1789.464286  
3,1,7673.833333  
3,1,4548.208333  
3,1,2373.579787  
3,1,2233.372159  
3,1,87345.702273  
3,1,11409.600000  
3,1,30413.056818  
3,1,15693.529018  
3,1,3708.203947  
3,1,3048.305851  
3,1,6209.966667  
3,1,1585.136364  
3,1,88907.506098  
3,1,18820.435897  
3,1,1995.828125  
3,1,6071.250000  
3,1,1640.115854  
3,1,2912.166667  
3,1,3625.757353  
3,1,1767.372340  
3,1,2569.567073  
3,1,15245.755952  
3,1,1871.162500  
3,1,2476.000000  
3,1,24819.175676  
3,1,2149.011029  
3,1,3500.706250  
3,1,3364.134146  
3,1,1785.065789  
3,1,7279.329787  
3,1,1674.881944  
3,1,3569.000000  
3,1,2778.316667  
3,1,2013.681818  
3,1,2644.006757  
3,1,1586.115854  
3,1,2708.642442  
3,1,1661.757812  
3,1,11818.280000  
3,1,1562.000000  
3,1,2713.210714  
3,1,5446.000000  
3,1,8906.554878  
3,1,1846.129032  
3,1,2465.906977  
3,1,8541.000000  
3,1,1763.255814  
3,1,3063.831250  
3,1,3457.880814  
3,1,3553.343750

3,1,1907.261628  
3,1,3605.250000  
3,1,12133.000000  
3,1,5085.727273  
3,1,17818.829861  
3,1,1757.088889  
3,1,1989.465116  
3,1,1770.892045  
3,1,2348.560976  
3,1,3853.700000  
3,1,2909.204167  
3,1,1763.788194  
3,1,2435.578125  
3,1,2249.468750  
3,1,1991.739130  
3,1,10338.045455  
3,1,2518.045455  
3,1,3571.500000  
3,1,19780.375000  
3,1,2260.133621  
3,1,2384.981818  
3,1,2668.283333  
3,1,2807.041667  
3,1,2623.890244  
3,1,2186.808511  
3,1,2537.252717  
3,1,3600.785326  
3,1,87039.915541  
3,1,2338.849138  
3,1,10642.214286  
3,1,8414.445946  
3,1,1500.337838  
3,1,1639.788889  
3,1,46428.750000  
3,1,2004.776786  
3,1,5089.902344  
3,1,2048.500000  
3,1,1716.280488  
3,1,2749.100000  
3,1,1552.082317  
3,1,1918.316327  
3,1,9034.375000  
3,1,28391.989583  
3,1,1553.421512  
3,1,11988.571429  
3,1,1584.142857  
3,1,5085.214286  
3,1,7101.281915  
3,1,2778.808511  
3,1,6637.588235  
3,1,1828.989130  
3,1,2687.906250  
3,1,3089.093750  
3,1,5264.375000  
3,1,1905.138889  
3,1,2134.819853  
3,1,8644.538194  
3,1,2529.235294  
3,1,1787.667553  
3,1,15273.875000  
3,1,12215.656250  
3,1,5146.428571  
3,1,1919.615385  
3,1,3004.047619  
3,1,28661.638889  
3,1,7031.600000

3,1,37181.977941  
3,1,1846.517045  
3,1,6794.052632  
3,1,2008.205128  
3,1,2311.937500  
3,1,1595.341912  
3,1,2125.277778  
3,1,3111.290323  
3,1,5323.586207  
3,1,1972.366071  
3,1,2548.508621  
3,1,60653.260417  
3,1,3445.115385  
3,1,7469.381944  
3,1,108596.440476  
3,1,4355.000000  
3,1,1632.734694  
3,1,2087.924419  
3,1,9940.330882  
3,1,17758.839286  
3,1,1753.831522  
3,1,16675.302326  
3,1,7002.312500  
3,1,1512.628289  
3,1,2229.825581  
3,1,3853.448370  
3,1,4869.379310  
3,1,8951.500000  
3,1,2825.680000  
3,1,3456.250000  
3,1,2557.552419  
3,1,1662.338889  
3,1,1898.773026  
3,1,3900.521552  
3,1,49327.068627  
3,1,4271.281977  
3,1,1641.387821  
3,1,1737.130208  
3,1,3439.875000  
3,1,10292.525000  
3,1,1530.630682  
3,1,4643.480263  
3,1,14593.032895  
3,1,3329.226562  
3,1,3095.893750  
3,1,13092.997549  
3,1,3143.758333  
3,1,6092.714286  
3,1,2114.682927  
3,1,3072.028846  
3,1,2155.596429  
3,1,13171.923611  
3,1,2631.403226  
3,1,6029.931452  
3,1,4043.194079  
3,1,38819.951705  
3,1,175732.957317  
3,1,2094.278125  
3,1,21750.133333  
3,1,2751.345000  
3,1,77271.029412  
3,1,3560.192308  
3,1,1706.068182  
3,1,2311.430851  
3,1,11859.496350  
3,1,9053.750000

3,1,5173.579545  
3,1,1859.697368  
3,1,2033.666667  
3,1,1788.494318  
3,1,1935.682927  
3,1,3140.275641  
3,1,6767.608553  
3,1,3461.647059  
3,1,8440.012931  
3,1,4106.542500  
3,1,2670.607843  
3,1,2981.821429  
3,1,2572.335366  
3,1,11050.515152  
3,1,58754.161290  
3,1,5599.914286  
3,1,3518.522436  
3,1,2054.868421  
3,1,2271.046875  
3,1,2295.154286  
3,1,111649.444444  
3,1,37740.470588  
3,1,1882.460106  
3,1,23755.392857  
3,1,3076.576705  
3,1,6410.739286  
3,1,1851.492857  
3,1,17483.714286  
3,1,1602.364286  
3,1,3957.928977  
3,1,18669.418919  
3,1,5636.607500  
3,1,19372.763158  
3,1,2437.581731  
3,1,9444.133721  
3,1,17200.500000  
3,1,2124.874016  
3,1,4807.352564  
3,1,2442.550676  
3,1,2699.259615  
3,1,32099.000000  
3,1,11142.868421  
3,1,3906.750000  
3,1,2554.224057  
3,1,3517.314286  
3,1,1605.523810  
3,1,1688.980000  
3,1,1532.675000  
3,1,1656.168605  
3,1,7534.057692  
3,1,2954.747500  
3,1,1787.614865  
3,1,1944.261905  
3,1,4078.769231  
3,1,2492.993421  
3,1,9446.540094  
3,1,1531.434659  
3,1,1724.790698  
3,1,3096.508523  
3,1,6617.489130  
3,1,2338.326923  
3,1,2783.250000  
3,1,2148.562500  
3,1,4560.324519  
3,1,1692.023256  
3,1,1610.618243

3,1,3374.906250  
3,1,88491.218750  
3,1,1854.710526  
3,1,3778.456522  
3,1,2591.400000  
3,1,4309.712209  
3,1,1723.777778  
3,1,2047.307692  
3,1,2515.747807  
3,1,3651.840000  
3,1,2285.638889  
3,1,35446.150735  
3,1,3963.979167  
3,1,1893.765957  
3,1,20197.578947  
3,1,3641.062500  
3,1,6240.125000  
3,1,5705.733333  
3,1,7401.073529  
3,1,3839.918367  
3,1,6023.462766  
3,1,3990.265957  
3,1,6332.538462  
3,1,7320.116935  
3,1,3742.187500  
3,1,1764.729730  
3,1,1936.354167  
3,1,2330.720395  
3,1,5367.809524  
3,1,4859.458333  
3,1,2086.026316  
3,1,2930.527778  
3,1,7363.378049  
3,1,9353.390306  
3,1,8271.630435  
3,1,3462.532143  
3,1,4484.047794  
3,1,1606.711538  
3,1,2437.500000  
3,1,5245.401316  
3,1,7566.901515  
3,1,2284.280000  
3,1,1596.644444  
3,1,2618.697674  
3,1,3083.843750  
3,1,4559.475000  
3,1,12296.268617  
3,1,1943.421875  
3,1,1711.233696  
3,1,9574.285714  
3,1,1853.107955  
3,1,2102.485119  
3,1,2995.250000  
3,1,3923.315476  
3,1,2002.619318  
3,1,34065.585366  
3,1,28022.505882  
3,1,30823.793103  
3,1,10227.052632  
3,1,2952.028571  
3,1,4017.426630  
3,1,2995.537500  
3,1,1796.010204  
3,1,10297.075472  
3,1,4603.108333  
3,1,5887.143617

3,1,2645.402778  
3,1,5699.200521  
3,1,2020.882812  
3,1,5934.654762  
3,1,1617.896341  
3,1,45447.051471  
3,1,3320.714286  
3,1,7098.808036  
3,1,1992.263393  
3,1,9788.425000  
3,1,8701.000000  
3,1,8596.308824  
3,1,4716.486607  
3,1,2715.750000  
3,1,3069.471591  
3,1,2790.479167  
3,1,7993.982143  
3,1,2772.830882  
3,1,1700.790000  
3,1,12676.786585  
3,1,1642.060714  
3,1,4362.502674  
3,1,1845.156977  
3,1,2110.929348  
3,1,3592.550000  
3,1,4358.100000  
3,1,2177.793605  
3,1,3687.973684  
3,1,1742.821809  
3,1,56248.130435  
3,1,23902.351351  
3,1,1751.293478  
3,1,6516.875000  
3,1,24122.424242  
3,1,1728.375000  
3,1,4320.798077  
3,1,1551.872159  
3,1,5004.565476  
3,1,2822.295732  
3,1,8357.901316  
3,1,50094.838068  
3,1,3122.142857  
3,1,1607.331250  
3,1,1568.093750  
3,1,2272.179878  
3,1,1817.539773  
3,1,1583.377717  
3,1,3569.833333  
3,1,6372.976190  
3,1,15181.448529  
3,1,3378.000000  
3,1,27847.787500  
3,1,2204.614362  
3,1,2264.365000  
3,1,1785.948718  
3,1,1746.609694  
3,1,2406.750000  
3,1,1626.965116  
3,1,2499.000000  
3,1,5837.420673  
3,1,2251.741279  
3,1,2010.489583  
3,1,51379.916667  
3,1,89456.765957  
3,1,2610.207317  
3,1,2170.744444

3,1,7413.452830  
3,1,3213.429487  
3,1,2067.535714  
3,1,2125.500000  
3,1,5686.178571  
3,1,3945.051471  
3,1,2280.158854  
3,1,9114.021226  
3,1,30925.380952  
3,1,5151.343750  
3,1,2432.000000  
3,1,1878.695652  
3,1,196468.633721  
3,1,2632.232558  
3,1,2592.226562  
3,1,2348.480769  
3,1,4298.782738  
3,1,3391.380556  
3,1,16353.246711  
3,1,69503.798077  
3,1,2635.544118  
3,1,21958.233553  
3,1,3826.770000  
3,1,1796.820946  
3,1,1588.728659  
3,1,3417.078947  
3,1,3535.375000  
3,1,2109.576087  
3,1,8473.804245  
3,1,1669.797872  
3,1,2607.538860  
3,1,3022.884848  
3,1,72211.285714  
3,1,3102.054878  
3,1,2861.024390  
3,1,3963.141304  
3,1,6508.755556  
3,1,2203.500000  
3,1,2195.416667  
3,1,2307.572917  
3,1,2236.105769  
3,1,2162.255319  
3,1,1705.877551  
3,1,33470.884615  
3,1,1560.095238  
3,1,2352.125000  
3,1,1714.343750  
3,1,169891.254545  
3,1,1606.391026  
3,1,2970.108974  
3,1,2800.500000  
3,1,12215.208333  
3,1,22951.730263  
3,1,2077.714286  
3,1,16749.510638  
3,1,4421.758523  
3,1,7892.439286  
3,1,1936.137755  
3,1,1533.357955  
3,1,1737.340426  
3,1,20481.616667  
3,1,2768.274390  
3,1,4918.947917  
3,1,2830.444444  
3,1,14086.392157  
3,1,1528.564103

3,1,4059.976190  
3,1,20025.322368  
3,1,1851.028409  
3,1,1765.875000  
3,1,4613.191860  
3,1,1960.697368  
3,1,4816.389706  
3,1,1874.294872  
3,1,1912.572368  
3,1,1744.731707  
3,1,2550.125000  
3,1,3474.403226  
3,1,2070.428571  
3,1,2113.276316  
3,1,1790.062500  
3,1,2685.541667  
3,1,6657.231481  
3,1,2243.972973  
3,1,1573.401163  
3,1,3454.529703  
3,1,47207.968750  
3,1,5426.500000  
3,1,5969.687500  
3,1,3392.875000  
3,1,1727.994565  
3,1,7484.932143  
3,1,14974.033333  
3,1,3675.138587  
3,1,3751.000000  
3,1,3603.937500  
3,1,1527.000000  
3,1,3158.437500  
3,1,1640.446023  
3,1,3237.300000  
3,1,10608.390625  
3,1,1715.232955  
3,1,7884.616667  
3,1,2918.292683  
3,1,4568.130435  
3,1,10135.800000  
3,1,1569.500000  
3,1,3946.613636  
3,1,1816.916667  
3,1,7727.800000  
3,1,1875.568182  
3,1,13210.820946  
3,1,1604.763158  
3,1,1669.756579  
3,1,4351.702703  
3,1,2088.918605  
3,1,1875.094595  
3,1,3611.329545  
3,1,5059.401042  
3,1,1868.139535  
3,1,21790.294872  
3,1,2737.428571  
3,1,17132.173077  
3,1,1680.581395  
3,1,6314.531250  
3,1,2473.146875  
3,1,1598.438889  
3,1,4497.875000  
3,1,1939.325521  
3,1,2206.764535  
3,1,4383.619186  
3,1,74221.625000

3,1,4665.191667  
3,1,1559.666667  
3,1,2566.411932  
3,1,6514.334239  
3,1,7385.357143  
3,1,35027.431250  
3,1,1567.766304  
3,1,4078.644444  
3,1,2378.641892  
3,1,1521.282143  
3,1,2007.804878  
3,1,2871.750000  
3,1,6317.994186  
3,1,4987.875000  
3,1,1675.196429  
3,1,1549.750000  
3,1,2611.684524  
3,1,74140.171429  
3,1,1958.869565  
3,1,2423.918919  
3,1,1772.404255  
3,1,2074.190000  
3,1,13273.556818  
3,1,10809.039216  
3,1,8708.306034  
3,1,1871.323370  
3,1,2265.125000  
3,1,14921.300000  
3,1,2254.861702  
3,1,1556.450758  
3,1,1831.216667  
3,1,5037.333333  
3,1,2169.654762  
3,1,2188.673913  
3,1,2162.778125  
3,1,48233.413462  
3,1,1681.187500  
3,1,9032.118421  
3,1,2199.431818  
3,1,124221.434211  
3,1,8178.254032  
3,1,3693.500000  
3,1,11294.636364  
3,1,1524.810000  
3,1,6417.062500  
3,1,2614.193548  
3,1,9365.170213  
3,1,1906.712500  
3,1,10204.297297  
3,1,6087.845109  
3,1,4583.600000  
3,1,12164.106618  
3,1,8056.621875  
3,1,3112.625000  
3,1,5252.787879  
3,1,8874.515625  
3,1,1600.845588  
3,1,1957.477941  
3,1,13672.657895  
3,1,3189.265152  
3,1,3519.121324  
3,1,3558.400000  
3,1,8471.641026  
3,1,109029.859756  
3,1,1512.058824  
3,1,12965.171875

3,1,1765.907895  
3,1,1666.371622  
3,1,2049.023256  
3,1,1755.739130  
3,1,1610.037162  
3,1,3302.025641  
3,1,1902.182432  
3,1,2709.679878  
3,1,2173.541667  
3,1,1550.339844  
3,1,4477.086957  
3,1,6826.720930  
3,1,7553.186047  
3,1,2924.947674  
3,1,15116.024194  
3,1,2107.903846  
3,1,3087.683333  
3,1,2721.668919  
3,1,1711.384615  
3,1,4743.986413  
3,1,3159.516667  
3,1,2001.720395  
3,1,58896.566038  
3,1,8811.706522  
3,1,1629.377907  
3,1,2022.111111  
3,1,3530.914634  
3,1,8019.422222  
3,1,2713.756579  
3,1,7301.417763  
3,1,1563.404762  
3,1,36715.450000  
3,1,2750.632576  
3,1,11390.971292  
3,1,1629.105263  
3,1,2136.111111  
3,1,2503.732143  
3,1,1719.134146  
3,1,1601.231707  
3,1,8017.187500  
3,1,1527.830556  
3,1,36461.636364  
3,1,12859.384868  
3,1,1754.026316  
3,1,5140.358108  
3,1,4157.734375  
3,1,1893.074405  
3,1,2510.794643  
3,1,19571.073171  
3,1,4051.420000  
3,1,11517.973684  
3,1,5212.428571  
3,1,1992.096591  
3,1,3882.000000  
3,1,1959.655660  
3,1,4574.833333  
3,1,2166.500000  
3,1,2771.155172  
3,1,13107.695312  
3,1,1696.500000  
3,1,9012.993750  
3,1,3438.435606  
3,1,4321.946429  
3,1,3917.923780  
3,1,7004.195122  
3,1,1621.559211

3,1,130398.000000  
3,1,4964.145161  
3,1,8660.847561  
3,1,51739.216912  
3,1,1839.625000  
3,1,1905.290698  
3,1,2095.328125  
3,1,1704.554688  
3,1,4570.634146  
3,1,10679.075521  
3,1,48649.347222  
3,1,3316.954545  
3,1,5377.814516  
3,1,4523.384615  
3,1,3816.128378  
3,1,4328.288043  
3,1,4677.482143  
3,1,7029.086111  
3,1,1712.317073  
3,1,3294.080357  
3,1,1737.993902  
3,1,3850.088542  
3,1,9209.500000  
3,1,1763.368421  
3,1,17111.423387  
3,1,1536.194853  
3,1,1612.153846  
3,1,1542.877551  
3,1,25959.250000  
3,1,1911.621429  
3,1,1661.793750  
3,1,2554.262500  
3,1,2616.477941  
3,1,1698.142857  
3,1,3106.562500  
3,1,22292.745968  
3,1,4283.284091  
3,1,1814.866667  
3,1,11648.604839  
3,1,9187.869318  
3,1,118606.375000  
3,1,7786.458333  
3,1,1581.448718  
3,1,1678.217391  
3,1,5189.506024  
3,1,16969.568182  
3,1,40684.108108  
3,1,3850.067308  
3,1,2538.470930  
3,1,1685.923077  
3,1,1648.840116  
3,1,1562.000000  
3,1,1958.508065  
3,1,1823.745342  
3,1,2377.841463  
3,1,4511.269231  
3,1,18576.869318  
3,1,10283.366071  
3,1,106489.973039  
3,1,1692.414062  
3,1,47488.258929  
3,1,2652.456250  
3,1,3610.547297  
3,1,1941.232143  
3,1,10576.651786  
3,1,2789.600000

3,1,10917.397059  
3,1,2239.949405  
3,1,6057.141304  
3,1,2062.355263  
3,1,4339.217391  
3,1,1978.587838  
3,1,5332.703125  
3,1,2672.047619  
3,1,8379.571970  
3,1,12606.362637  
3,1,2521.929245  
3,1,7711.186441  
3,1,2280.378378  
3,1,1844.994318  
3,1,1585.534884  
3,1,2498.375000  
3,1,2660.174419  
3,1,34016.091463  
3,1,3350.553571  
3,1,9840.687500  
3,1,1598.255814  
3,1,7540.239583  
3,1,3930.902778  
3,1,1597.160000  
3,1,1504.207317  
3,1,13927.573529  
3,1,21015.551020  
3,1,3989.343750  
3,1,15768.531250  
3,1,2355.235714  
3,1,2077.720238  
3,1,2140.561224  
3,1,93172.342105  
3,1,3017.200000  
3,1,31009.580357  
3,1,2827.187500  
3,1,3691.810976  
3,1,1818.430556  
3,1,2759.732558  
3,1,1970.906250  
3,1,51200.750000  
3,1,3032.468750  
3,1,2883.297170  
3,1,3223.577586  
3,1,9879.790698  
3,1,6632.785714  
3,1,1733.856707  
3,1,1581.284483  
3,1,1895.480769  
3,1,5681.458333  
3,1,3116.468085  
3,1,9878.647959  
3,1,55143.531250  
3,1,2778.279605  
3,1,3410.960784  
3,1,7342.120690  
3,1,1779.797500  
3,1,4877.978723  
3,1,3593.710106  
3,1,21189.743421  
3,1,5300.095238  
3,1,7229.670213  
3,1,3498.752315  
3,1,3298.481250  
3,1,5913.861111  
3,1,3177.812500

3,1,41262.875000  
3,1,3976.020833  
3,1,10320.195652  
3,1,1740.827586  
3,1,3512.504630  
3,1,3515.754902  
3,1,2697.335526  
3,1,2036.323864  
3,1,2862.268519  
3,1,5758.035714  
3,1,1879.277027  
3,1,2251.818627  
3,1,1664.014286  
3,1,14869.557692  
3,1,5473.482143  
3,1,5470.750000  
3,1,7914.448276  
3,1,2867.397436  
3,1,2375.513889  
3,1,3857.115854  
3,1,2432.346154  
3,1,11493.482955  
3,1,1646.735294  
3,1,2152.021739  
3,1,5669.391667  
3,1,1990.937500  
3,1,3520.086806  
3,1,3139.488208  
3,1,31224.689320  
3,1,3446.145833  
3,1,3386.500000  
3,1,1558.028409  
3,1,2139.655093  
3,1,43470.085308  
3,1,1801.818750  
3,1,2880.138889  
3,1,65435.086957  
3,1,8902.852273  
3,1,4289.078488  
3,1,1990.160714  
3,1,1781.293103  
3,1,5665.122159  
3,1,50154.743056  
3,1,4232.000000  
3,1,3341.770000  
3,1,5324.391304  
3,1,4306.971429  
3,1,11777.881579  
3,1,1697.640244  
3,1,15995.835526  
3,1,37801.025000  
3,1,3467.979167  
3,1,2175.224490  
3,1,2604.441176  
3,1,2072.386364  
3,1,9614.766447  
3,1,3112.750000  
3,1,12339.789474  
3,1,16194.923077  
3,1,9670.288462  
3,1,2653.937500  
3,1,3292.836735  
3,1,2333.055556  
3,1,10257.221591  
3,1,2447.711735  
3,1,3845.797872

3,1,1572.592105  
3,1,1635.072289  
3,1,1689.031250  
3,1,1804.497159  
3,1,5282.312500  
3,1,1907.462766  
3,1,3296.785714  
3,1,8703.377358  
3,1,1767.472826  
3,1,5172.404412  
3,1,3216.234375  
3,1,19073.375000  
3,1,2693.632353  
3,1,6041.312500  
3,1,1887.658537  
3,1,2347.333333  
3,1,2428.295455  
3,1,2108.105263  
3,1,13442.489130  
3,1,3290.431818  
3,1,1552.139706  
3,1,2232.444767  
3,1,1814.741379  
3,1,4816.127717  
3,1,2343.565217  
3,1,2273.411058  
3,1,1586.103261  
3,1,1729.161585  
3,1,25343.805233  
3,1,3175.136364  
3,1,1609.161585  
3,1,4864.375000  
3,1,4182.831081  
3,1,3006.000000  
3,1,35317.733108  
3,1,6535.750000  
3,1,2322.035714  
3,1,8858.981250  
3,1,1579.892045  
3,1,1907.096154  
3,1,2031.576705  
3,1,3257.517857  
3,1,2150.863636  
3,1,2017.450000  
3,1,2068.033163  
3,1,1933.962500  
3,1,4199.900000  
3,1,3161.952381  
3,1,3566.442073  
3,1,5271.093750  
3,1,13204.710106  
3,1,2938.349359  
3,1,5646.645833  
3,1,10040.420000  
3,1,2571.380682  
3,1,5674.556122  
3,1,2687.491071  
3,1,2325.500000  
3,1,2876.697917  
3,1,2848.250000  
3,1,3932.772727  
3,1,5799.721925  
3,1,2723.612500  
3,1,2588.014205  
3,1,25501.408163  
3,1,5381.552632

3,1,5279.867647  
3,1,17760.776042  
3,1,1945.323718  
3,1,2129.388889  
3,1,3541.534884  
3,1,35503.700980  
3,1,102106.435268  
3,1,148910.788462  
3,1,1737.660714  
3,1,8910.183673  
3,1,3069.482143  
3,1,89301.380435  
3,1,3056.500000  
3,1,1754.296296  
3,1,2190.454545  
3,1,24086.031250  
3,1,14826.625000  
3,1,3102.278409  
3,1,4888.946429  
3,1,2510.348485  
3,1,4587.468750  
3,1,1748.443396  
3,1,1511.538462  
3,1,1636.081395  
3,1,9007.734375  
3,1,5982.038889  
3,1,1852.187500  
3,1,3790.871622  
3,1,4169.729730  
3,1,1678.572917  
3,1,2955.171875  
3,1,2312.500000  
3,1,1724.500000  
3,1,2081.667553  
3,1,7961.204082  
3,1,2841.493421  
3,1,15031.500000  
3,1,5345.823529  
3,1,1556.550000  
3,1,8271.978261  
3,1,1899.540816  
3,1,29857.956522  
3,1,2421.883721  
3,1,2397.084848  
3,1,9336.188596  
3,1,3296.037037  
3,1,2296.950521  
3,1,1776.053571  
3,1,55864.187500  
3,1,3850.600000  
3,1,4308.513158  
3,1,2826.630952  
3,1,2259.790698  
3,1,1549.098837  
3,1,1731.957317  
3,1,3320.671875  
3,1,5187.750000  
3,1,3195.250000  
3,1,2854.664286  
3,1,8055.271739  
3,1,3139.146739  
3,1,4742.679487  
3,1,1924.153846  
3,1,2666.965909  
3,1,2632.060976  
3,1,1552.332500

3,1,1541.750000  
3,1,5436.153302  
3,1,8833.229730  
3,1,24768.923077  
3,1,10510.242424  
3,1,1499.478723  
3,1,1765.781250  
3,1,4160.882979  
3,1,5131.953125  
3,1,17234.291667  
3,1,2959.218750  
3,1,1820.262097  
3,1,2011.947368  
3,1,2108.910714  
3,1,11118.930556  
3,1,15853.875000  
3,1,1507.710526  
3,1,2099.967391  
3,1,1708.041899  
3,1,4711.464844  
3,1,5184.703804  
3,1,3177.959184  
3,1,8718.118421  
3,1,1598.095395  
3,1,20251.937500  
3,1,2322.631579  
3,1,3166.705882  
3,1,2109.628571  
3,1,2068.797794  
3,1,3297.451531  
3,1,9354.006329  
3,1,15182.853659  
3,1,1750.360119  
3,1,4240.975610  
3,1,12066.344595  
3,1,27389.625000  
3,1,1852.169271  
3,1,2581.920455  
3,1,2022.510870  
3,1,2241.448276  
3,1,1691.787162  
3,1,2471.347561  
3,1,3356.317073  
3,1,4029.680921  
3,1,2495.804688  
3,1,23791.593750  
3,1,5121.085938  
3,1,4902.051136  
3,1,2857.558511  
3,1,2668.222561  
3,1,3399.842105  
3,1,1504.934524  
3,1,57303.032051  
3,1,2470.189189  
3,1,6007.109756  
3,1,8511.769231  
3,1,14194.089744  
3,1,6717.142857  
3,1,1954.766667  
3,1,1501.463415  
3,1,1972.100000  
3,1,5923.530303  
3,1,13090.303571  
3,1,5434.288043  
3,1,1789.505814  
3,1,1611.600000

3,1,1502.165000  
3,1,3745.586538  
3,1,31710.236111  
3,1,4813.352041  
3,1,5405.081081  
3,1,2111.295918  
3,1,3260.600000  
3,1,4065.500000  
3,1,12902.000000  
3,1,4272.857143  
3,1,1807.511905  
3,1,4367.858108  
3,1,9939.390625  
3,1,15016.073529  
3,1,2816.000000  
3,1,1785.256098  
3,1,1541.939189  
3,1,4654.285714  
3,1,1513.488281  
3,1,1871.978261  
3,1,3171.448276  
3,1,1612.111111  
3,1,7598.875000  
3,1,17495.074586  
3,1,9352.478659  
3,1,6218.571023  
3,1,74254.016026  
3,1,4585.413043  
3,1,2875.189189  
3,1,25507.523256  
3,1,7701.705128  
3,1,2950.258929  
3,1,13441.917969  
3,1,6204.437500  
3,1,7806.773707  
3,1,2460.043605  
3,1,1559.244318  
3,1,2167.424419  
3,1,8277.291667  
3,1,8615.909884  
3,1,2301.530303  
3,1,6565.324324  
3,1,2550.588710  
3,1,2302.891892  
3,1,3725.716518  
3,1,2959.075758  
3,1,1670.778481  
3,1,2633.804878  
3,1,2250.125000  
3,1,2664.442568  
3,1,86606.221429  
3,1,8775.335526  
3,1,4742.220745  
3,1,1953.880435  
3,1,12275.083333  
3,1,1668.895349  
3,1,1644.061224  
3,1,2243.443182  
3,1,1688.271277  
3,1,41603.632812  
3,1,1532.671875  
3,1,2115.666667  
3,1,15456.329268  
3,1,1847.832317  
3,1,2226.130102  
3,1,1617.554487

3,1,2576.675676  
3,1,2753.152344  
3,1,3265.085106  
3,1,1984.584559  
3,1,3658.008065  
3,1,1674.339286  
3,1,1748.375000  
3,1,2265.440789  
3,1,4670.772727  
3,1,3557.892045  
3,1,5810.540698  
3,1,29549.166667  
3,1,2466.700599  
3,1,3598.642857  
3,1,9128.843750  
3,1,1611.875000  
3,1,3825.788462  
3,1,2402.732143  
3,1,1540.967949  
3,1,3828.419444  
3,1,1803.031250  
3,1,2310.045455  
3,1,1820.215116  
3,1,25852.223485  
3,1,1804.250000  
3,1,1704.362805  
3,1,2156.519231  
3,1,4669.888298  
3,1,2935.733333  
3,1,3629.881944  
3,1,2138.452381  
3,1,3173.312500  
3,1,14803.232143  
3,1,2068.205357  
3,1,1692.256410  
3,1,1636.259615  
3,1,2682.219828  
3,1,1736.395349  
3,1,15495.891304  
3,1,3421.458101  
3,1,2514.241935  
3,1,12683.925676  
3,1,37362.038043  
3,1,2302.321429  
3,1,4335.371622  
3,1,82722.130435  
3,1,13975.363636  
3,1,3128.145349  
3,1,2691.788194  
3,1,4959.753125  
3,1,14207.982143  
3,1,3862.000000  
3,1,2413.655488  
3,1,10360.511111  
3,1,6220.835938  
3,1,5602.218750  
3,1,15549.952206  
3,1,5349.801829  
3,1,7902.282258  
3,1,6919.458333  
3,1,6550.284884  
3,1,1595.837838  
3,1,35613.974265  
3,1,3895.175000  
3,1,1673.736979  
3,1,3618.195652

3,1,7177.966912  
3,1,1927.987500  
3,1,2777.673077  
3,1,1944.000000  
3,1,1529.085937  
3,1,9593.600000  
3,1,2387.625000  
3,1,2119.887097  
3,1,2682.484848  
3,1,4556.822115  
3,1,15918.290625  
3,1,1742.000000  
3,1,2696.340909  
3,1,3369.594388  
3,1,1521.654762  
3,1,2604.765625  
3,1,10553.300000  
3,1,1704.461538  
3,1,3997.510870  
3,1,1675.137500  
3,1,2551.031250  
3,1,1637.083333  
3,1,3724.304878  
3,1,6627.750000  
3,1,2415.252717  
3,1,2926.718750  
3,1,5592.734043  
3,1,29287.454545  
3,1,2847.315476  
3,1,5026.315625  
3,1,4684.387500  
3,1,3684.516667  
3,1,2693.754167  
3,1,3799.500000  
3,1,13442.984043  
3,1,1923.469388  
3,1,15916.594595  
3,1,14091.413043  
3,1,2615.907895  
3,1,2299.394886  
3,1,2638.469595  
3,1,2531.973214  
3,1,2340.658537  
3,1,1569.000000  
3,1,1682.039474  
3,1,2913.698529  
3,1,7239.523684  
3,1,2805.000000  
3,1,2245.589286  
3,1,1691.660714  
3,1,1548.304687  
3,1,9361.823529  
3,1,14145.371622  
3,1,2820.583333  
3,1,2611.613636  
3,1,8622.800000  
3,1,4216.595930  
3,1,2155.181818  
3,1,4088.024390  
3,1,4326.401163  
3,1,4609.147436  
3,1,3752.500000  
3,1,3556.340625  
3,1,6833.245968  
3,1,7083.750000  
3,1,5292.692308

3,1,8791.925595  
3,1,1923.500000  
3,1,6952.985294  
3,1,3318.136364  
3,1,3379.217391  
3,1,1854.985294  
3,1,1517.215909  
3,1,12252.763158  
3,1,2372.168919  
3,1,4691.080357  
3,1,2447.957143  
3,1,3094.939655  
3,1,3247.312500  
3,1,1512.431818  
3,1,2346.500000  
3,1,28927.890244  
3,1,2999.954545  
3,1,1550.570946  
3,1,40007.204082  
3,1,3060.270270  
3,1,1819.098684  
3,1,3734.000000  
3,1,1727.000000  
3,1,8760.465909  
3,1,2111.578947  
3,1,2505.666667  
3,1,2335.027027  
3,1,28529.724138  
3,1,11729.500000  
3,1,2928.527027  
3,1,5470.726190  
3,1,3633.983974  
3,1,3168.737179  
3,1,1727.640625  
3,1,2596.952381  
3,1,2905.500000  
3,1,3700.664062  
3,1,5264.457447  
3,1,1892.326923  
3,1,1981.779762  
3,1,1803.949324  
3,1,3970.508065  
3,1,1993.960938  
3,1,5478.144737  
3,1,6476.889706  
3,1,1580.917553  
3,1,1751.562500  
3,1,2956.644022  
3,1,9336.063636  
3,1,6720.007812  
3,1,9685.791667  
3,1,3662.609375  
3,1,2596.353261  
3,1,5943.285714  
3,1,2076.795455  
3,1,1957.250000  
3,1,3998.562500  
3,1,5410.182432  
3,1,3111.943548  
3,1,2441.125000  
3,1,4649.465116  
3,1,2438.051829  
3,1,1774.176471  
3,1,2403.610714  
3,1,4592.086957  
3,1,8503.714286

3,1,2684.875000  
3,1,8709.897059  
3,1,3889.765625  
3,1,2008.446429  
3,1,2090.781250  
3,1,2971.125000  
3,1,4397.583333  
3,1,2106.104651  
3,1,8477.835366  
3,1,3628.666667  
3,1,2182.589286  
3,1,7205.151786  
3,1,11066.095588  
3,1,2371.974359  
3,1,1704.250000  
3,1,4189.890625  
3,1,1606.333333  
3,1,5668.927778  
3,1,1880.567308  
3,1,1826.659091  
3,1,1994.134615  
3,1,6276.692308  
3,1,72523.886364  
3,1,7997.175595  
3,1,5140.250000  
3,1,1564.850000  
3,1,21964.012195  
3,1,1853.906250  
3,1,12748.000000  
3,1,1850.786585  
3,1,1806.665625  
3,1,2081.841667  
3,1,21462.710526  
3,1,3569.116279  
3,1,1560.238971  
3,1,1786.397222  
3,1,2300.909375  
3,1,4167.179878  
3,1,2330.510638  
3,1,9808.014706  
3,1,1530.066667  
3,1,4793.117188  
3,1,2713.779070  
3,1,1735.233333  
3,1,2783.847561  
3,1,2480.095588  
3,1,1725.929348  
3,1,2192.666667  
3,1,1633.867500  
3,1,2887.310000  
3,1,3861.975694  
3,1,2068.448980  
3,1,2157.575000  
3,1,23892.989130  
3,1,2611.323171  
3,1,2222.611842  
3,1,8243.279255  
3,1,2087.750000  
3,1,2902.312500  
3,1,3195.833333  
3,1,2246.981061  
3,1,2514.943750  
3,1,2771.700000  
3,1,2461.302326  
3,1,1810.096939  
3,1,2416.358108

3,1,1900.255000  
3,1,1648.663043  
3,1,2301.888889  
3,1,2002.258152  
3,1,8268.489362  
3,1,9618.863281  
3,1,1975.978261  
3,1,8639.119444  
3,1,3184.564103  
3,1,6845.101064  
3,1,1912.473684  
3,1,1575.672872  
3,1,62446.103448  
3,1,2781.720395  
3,1,4543.076087  
3,1,1773.554167  
3,1,12716.000000  
3,1,4370.166667  
3,1,11943.560000  
3,1,2693.437500  
3,1,2052.281250  
3,1,3562.368243  
3,1,3264.055556  
3,1,1781.350000  
3,1,19566.200000  
3,1,12415.794872  
3,1,68210.218750  
3,1,3124.725490  
3,1,5001.695122  
3,1,5229.328125  
3,1,2384.620192  
3,1,2815.336957  
3,1,4933.821429  
3,1,2090.275000  
3,1,3184.130682  
3,1,2515.419872  
3,1,2479.400000  
3,1,12274.500000  
3,1,1594.789474  
3,1,1603.669118  
3,1,1709.604167  
3,1,26714.430851  
3,1,4362.698661  
3,1,1505.334975  
3,1,2071.545455  
3,1,3794.509434  
3,1,1554.609375  
3,1,1516.355978  
3,1,2178.166667  
3,1,2201.546875  
3,1,111711.025735  
3,1,2695.115385  
3,1,25488.919643  
3,1,1874.875000  
3,1,19374.663793  
3,1,6019.164706  
3,1,7102.371795  
3,1,1920.036111  
3,1,17718.331395  
3,1,14453.946429  
3,1,1950.157895  
3,1,6554.177632  
3,1,5480.650000  
3,1,1558.250000  
3,1,2266.865385  
3,1,2689.408163

3,1,14874.813953  
3,1,3645.884259  
3,1,2474.655000  
3,1,2110.400000  
3,1,4354.125000  
3,1,19250.433333  
3,1,10361.709559  
3,1,7515.765625  
3,1,14639.527273  
3,1,4469.218750  
3,1,22240.372340  
3,1,2571.000000  
3,1,9783.562500  
3,1,3824.685811  
3,1,2618.471875  
3,1,6349.536932  
3,1,1927.713415  
3,1,3836.388889  
3,1,2667.645349  
3,1,3848.890000  
3,1,16101.359375  
3,1,6478.750000  
3,1,1955.750000  
3,1,1939.244186  
3,1,2700.122449  
3,1,1612.631579  
3,1,4694.183673  
3,1,24701.445946  
3,1,1551.659091  
3,1,2642.592391  
3,1,2204.382353  
3,1,5430.054487  
3,1,3093.233553  
3,1,5843.867647  
3,1,1806.807927  
3,1,6511.415625  
3,1,7629.625000  
3,1,2270.329787  
3,1,4042.986702  
3,1,6394.349265  
3,1,1863.768293  
3,1,3528.541667  
3,1,2155.764706  
3,1,117055.041667  
3,1,2055.250000  
3,1,10253.041667  
3,1,23404.500000  
3,1,1541.383333  
3,1,7958.552239  
3,1,4668.351064  
3,1,114738.285326  
3,1,11648.531250  
3,1,2381.776163  
3,1,8135.146341  
3,1,1773.774510  
3,1,1622.293605  
3,1,1829.857955  
3,1,22947.093750  
3,1,1710.818182  
3,1,2063.800000  
3,1,1880.094828  
3,1,19166.695312  
3,1,5805.989362  
3,1,3957.959184  
3,1,3721.592391  
3,1,2857.975543

3,1,4038.209091  
3,1,1647.821970  
3,1,6468.278689  
3,1,11395.977987  
3,1,24963.804469  
3,1,3100.218750  
3,1,4627.911392  
3,1,1562.662500  
3,1,17479.565789  
3,1,70951.887755  
3,1,6227.028409  
3,1,28806.633523  
3,1,10294.030702  
3,1,1649.714286  
3,1,2018.500000  
3,1,2655.375000  
3,1,18276.732955  
3,1,6794.102273  
3,1,43908.653846  
3,1,3169.743056  
3,1,6348.235294  
3,1,5864.857143  
3,1,9931.936170  
3,1,11352.020270  
3,1,1970.518293  
3,1,7396.750000  
3,1,10446.083333  
3,1,3833.418605  
3,1,2070.844444  
3,1,1859.813953  
3,1,34302.215909  
3,1,6672.709302  
3,1,1548.985294  
3,1,3695.143293  
3,1,2306.163265  
3,1,2807.083333  
3,1,2251.609756  
3,1,7056.793478  
3,1,6750.264706  
3,1,1766.155556  
3,1,4673.220588  
3,1,2909.134804  
3,1,4164.350000  
3,1,7450.714286  
3,1,8852.752660  
3,1,1508.157500  
3,1,11343.905405  
3,1,3522.159091  
3,1,5390.666667  
3,1,3262.187500  
3,1,5664.200000  
3,1,1822.636111  
3,1,3755.029762  
3,1,2452.840000  
3,1,8682.662234  
3,1,2129.234756  
3,1,3019.595930  
3,1,5752.937500  
3,1,22865.589286  
3,1,2232.169903  
3,1,4591.045455  
3,1,4070.819149  
3,1,3556.866667  
3,1,3077.677778  
3,1,1582.550481  
3,1,37578.714286

3,1,12260.032787  
3,1,101050.548780  
3,1,2318.076087  
3,1,1603.921512  
3,1,5808.031447  
3,1,1670.629630  
3,1,32620.572368  
3,1,88983.557692  
3,1,3494.195652  
3,1,3888.461111  
3,1,4715.663462  
3,1,2586.375000  
3,1,8421.008772  
3,1,10429.379310  
3,1,3119.192708  
3,1,8293.271277  
3,1,1518.825000  
3,1,5226.907258  
3,1,4315.737500  
3,1,16793.338816  
3,1,2897.890625  
3,1,25302.959677  
3,1,5536.943182  
3,1,3525.666667  
3,1,14394.838235  
3,1,3014.369792  
3,1,7822.113636  
3,1,1901.116279  
3,1,2688.109756  
3,1,2415.010081  
3,1,7537.578629  
3,1,2963.183333  
3,1,3569.442708  
3,1,3761.166667  
3,1,4515.018868  
3,1,37584.727273  
3,1,3113.240000  
3,1,7355.612500  
3,1,1621.108696  
3,1,2122.033784  
3,1,1571.181034  
3,1,1820.562500  
3,1,3345.405488  
3,1,3484.210227  
3,1,4387.131410  
3,1,14622.306818  
3,1,1750.000000  
3,1,21244.202703  
3,1,3457.605263  
3,1,24155.185976  
3,1,4153.437500  
3,1,5055.656250  
3,1,2632.416667  
3,1,5147.481771  
3,1,1660.312500  
3,1,2358.535714  
3,1,68692.170732  
3,1,8259.000000  
3,1,4870.659091  
3,1,57787.139706  
3,1,26325.442308  
3,1,2886.215686  
3,1,10701.139706  
3,1,2482.773936  
3,1,4820.136364  
3,1,1697.234043

3,1,3867.545732  
3,1,3547.546512  
3,1,1645.812500  
3,1,7382.000000  
3,1,2680.480769  
4,2,6892.320652  
4,2,2089.869565  
4,2,1686.707500  
4,2,3249.757353  
4,2,2452.678977  
4,2,2392.609091  
4,2,5436.945783  
4,2,1777.920103  
4,2,3822.359375  
4,2,2316.016304  
4,2,2036.949468  
4,2,7196.296875  
4,2,6517.532143  
4,2,4275.400000  
4,2,1809.031250  
4,2,1597.275000  
4,2,1726.476562  
4,2,1737.120455  
4,2,9608.012500  
4,2,2244.434375  
4,2,4752.726562  
4,2,2011.000000  
4,2,3122.008152  
4,2,7005.142857  
4,2,5003.739130  
4,2,9133.500000  
4,2,2279.968750  
4,2,4833.250000  
4,2,3146.182692  
4,2,5886.982143  
4,2,1839.692568  
4,2,2214.475000  
4,2,11556.713068  
4,2,3473.570000  
4,2,4365.491018  
4,2,2267.642458  
4,2,2801.821429  
4,2,2904.164286  
4,2,3969.178571  
4,2,3583.916667  
4,2,3120.827128  
4,2,3951.706395  
4,2,2515.557018  
4,2,7263.838710  
4,2,1662.721088  
4,2,4429.761905  
4,2,1857.405405  
4,2,2159.752358  
4,2,2988.297872  
4,2,1574.421053  
4,2,4699.918367  
4,2,2166.505000  
4,2,4771.852941  
4,2,1600.000000  
4,2,5619.212054  
4,2,2784.573529  
4,2,4407.411765  
4,2,1710.959184  
4,2,5410.940341  
4,2,4576.212264  
4,2,2228.609756

4,2,2412.726974  
4,2,3263.054688  
4,2,2295.645714  
4,2,2218.636364  
4,2,1681.550000  
4,2,3779.517045  
4,2,3778.157500  
4,2,1824.962963  
4,2,14675.052632  
4,2,1932.000000  
4,2,3956.197674  
4,2,17697.456522  
4,2,1680.707865  
4,2,3993.973837  
4,2,3957.712838  
4,2,2258.770833  
4,2,2010.741071  
4,2,8614.395000  
4,2,3434.170455  
4,2,1902.833333  
4,2,2751.916667  
4,2,1824.537500  
4,2,4071.259868  
4,2,5210.075000  
4,2,2533.500000  
4,2,10463.353448  
4,2,4272.841346  
4,2,8332.380208  
4,2,12992.982500  
4,2,4239.718137  
4,2,10291.309211  
4,2,3765.950000  
4,2,4570.215909  
4,2,4928.382353  
4,2,7263.338942  
4,2,3141.910256  
4,2,9898.398437  
4,2,3905.755102  
4,2,4676.417614  
4,2,4153.649390  
4,2,4077.562500  
4,2,3942.830882  
4,2,3493.062500  
4,2,6029.705882  
4,2,5133.518939  
4,2,2687.882979  
4,2,2892.433333  
4,2,2321.387500  
4,2,8065.750000  
4,2,1662.144886  
4,2,2102.958333  
4,2,1835.665761  
4,2,7414.125000  
4,2,1512.387755  
4,2,1541.000000  
4,2,2210.668750  
4,2,1647.365385  
4,2,6585.285714  
4,2,6513.285714  
4,2,3785.895238  
4,2,2988.080556  
4,2,7102.644608  
4,2,15944.895833  
4,2,1907.446809  
4,2,1974.603659  
4,2,1903.872340

4,2,1611.220238  
4,2,5255.416667  
4,2,2473.812500  
4,2,4158.059880  
4,2,5349.754717  
4,2,8303.046053  
4,2,2284.667763  
4,2,2014.364865  
4,2,10104.984375  
4,2,1747.571970  
4,2,2508.160000  
4,2,2902.613095  
4,2,6510.937173  
4,2,1819.795455  
4,2,3840.154412  
4,2,8780.019231  
4,2,4223.825000  
4,2,1729.381250  
4,2,3766.053191  
4,2,13515.812500  
4,2,3253.043605  
4,2,2850.477941  
4,2,7017.904762  
4,2,2571.031250  
4,2,4360.112500  
4,2,2375.840278  
4,2,4893.383333  
4,2,2452.560209  
4,2,2887.058824  
4,2,4613.461538  
4,2,4049.344920  
4,2,1960.686047  
4,2,2456.769737  
4,2,2580.607143  
4,2,2133.842105  
4,2,2751.494186  
4,2,8829.456897  
4,2,3683.907216  
4,2,3496.211957  
4,2,1606.781250  
4,2,1909.776316  
4,2,2922.692308  
4,2,2239.935268  
4,2,1761.155405  
4,2,1706.100000  
4,2,1653.216216  
4,2,2577.702381  
4,2,1717.098039  
4,2,2550.627778  
4,2,3317.302326  
4,2,2225.529070  
4,2,8360.875000  
4,2,1740.437500  
4,2,2547.968750  
4,2,2482.425000  
4,2,4931.200000  
4,2,3824.387195  
4,2,1877.105978  
4,2,4875.343750  
4,2,7423.965116  
4,2,1683.900735  
4,2,7955.214286  
4,2,6887.918103  
4,2,4604.307692  
4,2,1506.868056  
4,2,7425.666667

4,2,3439.500000  
4,2,3398.423077  
4,2,1619.732558  
4,2,1940.222222  
4,2,2202.593750  
4,2,1851.010638  
4,2,3191.317857  
4,2,2690.645833  
4,2,2043.147059  
4,2,6404.562500  
4,2,3411.445455  
4,2,3781.599057  
4,2,1986.065217  
4,2,4181.921053  
4,2,1965.910256  
4,2,1841.400943  
4,2,4055.000000  
4,2,2890.452586  
4,2,1926.925676  
4,2,3124.654135  
4,2,10770.170000  
4,2,1875.538462  
4,2,1538.081522  
4,2,2141.875000  
4,2,5203.425532  
4,2,3272.574561  
4,2,5749.359756  
4,2,1581.000000  
4,2,6182.187500  
4,2,2397.327500  
4,2,3699.807432  
4,2,3054.237805  
4,2,5048.625000  
4,2,2007.537234  
4,2,9167.809524  
4,2,2728.483173  
4,2,3359.250000  
4,2,6344.051630  
4,2,8625.013453  
4,2,4260.500000  
4,2,25887.611111  
4,2,2050.125000  
4,2,1683.230769  
4,2,1909.821875  
4,2,1815.131579  
4,2,7661.166667  
4,2,2005.770270  
4,2,1503.044118  
4,2,4125.040816  
4,2,3926.396739  
4,2,4017.625000  
4,2,2982.161932  
4,2,11308.608333  
4,2,3522.307927  
4,2,2132.500000  
4,2,1903.586207  
4,2,5403.095238  
4,2,2278.318750  
4,2,2771.729730  
4,2,5123.255102  
4,2,3013.496622  
4,2,3463.037791  
4,2,2309.837838  
4,2,1655.937173  
4,2,3593.428571  
4,2,2293.689024

4,2,6183.296875  
4,2,7387.764706  
4,2,2847.285714  
4,2,10073.970968  
4,2,9195.000000  
4,2,2361.741848  
4,2,4220.864796  
4,2,1980.343750  
4,2,1788.664894  
4,2,3036.898649  
4,2,3399.864130  
4,2,1544.724684  
4,2,15803.115385  
4,2,3899.177273  
4,2,50830.500000  
4,2,3221.972222  
4,2,2666.903409  
4,2,2101.825581  
4,2,3210.613095  
4,2,2711.462428  
4,2,4178.535714  
4,2,8050.472973  
4,2,2652.007692  
4,2,6067.111702  
4,2,6842.454545  
4,2,2743.176471  
4,2,1885.475000  
4,2,3091.022959  
4,2,17120.747396  
4,2,5068.165094  
4,2,2555.285714  
4,2,2693.375000  
4,2,2454.773256  
4,2,1623.187500  
4,2,2351.100694  
4,2,2673.883929  
4,2,2082.540441  
4,2,2479.553571  
4,2,2170.040948  
4,2,2441.188725  
4,2,5074.187204  
4,2,9812.120079  
4,2,1991.406863  
4,2,2656.530000  
4,2,1709.763158  
4,2,3235.844388  
4,2,2814.104651  
4,2,5980.078804  
4,2,2457.803922  
4,2,2048.529101  
4,2,1714.660000  
4,2,2348.083333  
4,2,1668.068182  
4,2,5544.125000  
4,2,5929.777778  
4,2,1901.153302  
4,2,2002.261364  
4,2,2045.309028  
4,2,6520.502660  
4,2,4341.953125  
4,2,1752.016026  
4,2,1668.193750  
4,2,1700.361111  
4,2,3286.171875  
4,2,2457.924419  
4,2,3139.453704

4,2,2619.232143  
4,2,3479.669643  
4,2,2961.469595  
4,2,2682.273585  
4,2,1874.980769  
4,2,2110.953125  
4,2,1632.238636  
4,2,4854.269231  
4,2,2109.321429  
4,2,5709.817308  
4,2,1916.423077  
4,2,2049.125000  
4,2,28635.024390  
4,2,2813.875000  
4,2,2582.255000  
4,2,4546.029940  
4,2,5801.875000  
4,2,2119.369318  
4,2,3059.861702  
4,2,3115.865385  
4,2,5403.719340  
4,2,1500.222222  
4,2,7280.490566  
4,2,2317.283537  
4,2,3476.754902  
4,2,2241.854167  
4,2,5257.565476  
4,2,3436.937500  
4,2,1734.773437  
4,2,3677.475000  
4,2,3671.307018  
4,2,1583.959302  
4,2,5711.418605  
4,2,2384.346154  
4,2,2438.682927  
4,2,1642.006849  
4,2,3025.083333  
4,2,5133.631757  
4,2,8645.461111  
4,2,2381.283163  
4,2,12776.157895  
4,2,3530.500000  
4,2,2033.406250  
4,2,3239.953804  
4,2,1679.252660  
4,2,3033.902174  
4,2,3647.114035  
4,2,10972.295455  
4,2,1882.162500  
4,2,1683.645390  
4,2,5618.652778  
4,2,3082.236111  
4,2,1680.090909  
4,2,3868.000000  
4,2,10442.154412  
4,2,7679.038462  
4,2,1835.010417  
4,2,2516.887821  
4,2,1507.964286  
4,2,2346.094595  
4,2,1910.451923  
4,2,8347.909091  
4,2,3569.907609  
4,2,3189.400000  
4,2,3207.750000  
4,2,3595.637755

4,2,3414.686364  
4,2,1572.118750  
4,2,1869.887324  
4,2,1641.222222  
4,2,11314.786932  
4,2,3177.523438  
4,2,1667.148810  
4,2,7288.000000  
4,2,2711.818750  
4,2,2007.857955  
4,2,5864.492424  
4,2,1582.958333  
4,2,2459.524390  
4,2,3103.170000  
4,2,1957.821429  
4,2,1761.065476  
4,2,3514.850000  
4,2,2376.166667  
4,2,9764.861111  
4,2,2829.365854  
4,2,2305.154070  
4,2,3035.553571  
4,2,3148.489796  
4,2,1588.686047  
4,2,2268.061111  
4,2,1938.337838  
4,2,8311.078125  
4,2,2499.515625  
4,2,3870.325820  
4,2,2624.357143  
4,2,2686.115132  
4,2,6612.565341  
4,2,1787.750000  
4,2,5090.062500  
4,2,4841.961538  
4,2,2583.232143  
4,2,1617.027174  
4,2,2110.935811  
4,2,2368.860465  
4,2,4165.413265  
4,2,22406.465517  
4,2,4989.217105  
4,2,4333.421053  
4,2,2003.982143  
4,2,2916.567073  
4,2,4581.325000  
4,2,2786.662162  
4,2,4105.474359  
4,2,1887.744318  
4,2,4506.961538  
4,2,1991.875000  
4,2,3287.356707  
4,2,20673.995283  
4,2,3976.877500  
4,2,3194.733333  
4,2,2203.343750  
4,2,6290.359375  
4,2,9282.940000  
4,2,10791.804167  
4,2,5540.709790  
4,2,1602.836478  
4,2,1986.873418  
4,2,2664.494624  
4,2,1873.439024  
4,2,2804.051887  
4,2,5340.982143

4,2,2899.784314  
4,2,6772.932065  
4,2,1528.092949  
4,2,3857.470588  
4,2,10678.136842  
4,2,2641.128049  
4,2,7919.255319  
4,2,1556.166667  
4,2,4212.156250  
4,2,6345.855769  
4,2,2118.425532  
4,2,2845.747768  
4,2,1991.625000  
4,2,4463.780000  
4,2,2289.885417  
4,2,2528.691489  
4,2,1819.010870  
4,2,1817.600000  
4,2,2687.031250  
4,2,1988.348214  
4,2,3790.544872  
4,2,2183.989583  
4,2,2027.073864  
4,2,1681.680921  
4,2,2910.475000  
4,2,4077.403409  
4,2,4720.554187  
4,2,1956.714286  
4,2,1901.520833  
4,2,8267.887500  
4,2,4073.312500  
4,2,1768.631579  
4,2,11110.938144  
4,2,6315.451807  
4,2,4127.437126  
4,2,4827.639474  
4,2,1868.807895  
4,2,2241.861111  
4,2,2306.810976  
4,2,3098.350000  
4,2,3652.500000  
4,2,2221.000000  
4,2,1536.393939  
4,2,3838.232558  
4,2,2083.367089  
4,2,2216.366848  
4,2,1838.150000  
4,2,3598.744444  
4,2,1578.365854  
4,2,3006.914474  
4,2,5395.783019  
4,2,4132.750000  
4,2,4464.428082  
4,2,1984.539474  
4,2,3648.857143  
4,2,15985.729167  
4,2,1714.000000  
4,2,1619.682432  
4,2,5800.088235  
4,2,2299.241935  
4,2,3582.231707  
4,2,16461.425532  
4,2,3820.114583  
4,2,2557.625000  
4,2,1612.606250  
4,2,7975.041667

4,2,4981.934896  
4,2,2227.125000  
4,2,5477.850000  
4,2,11990.318548  
4,2,2444.894231  
4,2,2463.281250  
4,2,1690.345238  
4,2,2709.625000  
4,2,2628.048077  
4,2,4631.675676  
4,2,1857.497222  
4,2,2186.527778  
4,2,2931.572674  
4,2,5487.617647  
4,2,2053.269231  
4,2,23393.785714  
4,2,8123.406250  
4,2,2567.724359  
4,2,2784.425000  
4,2,8322.388889  
4,2,3242.062500  
4,2,7156.029412  
4,2,3503.875000  
4,2,5698.775000  
4,2,2605.382979  
4,2,2738.502660  
4,2,10131.379913  
4,2,2147.996403  
4,2,7512.737805  
4,2,8745.625000  
4,2,2346.728571  
4,2,1551.851351  
4,2,2335.750000  
4,2,5083.331658  
4,2,4340.342466  
4,2,3136.757310  
4,2,2044.342105  
4,2,1512.292857  
4,2,3537.309091  
4,2,1789.652439  
4,2,1568.807692  
4,2,2612.044118  
4,2,1863.062500  
4,2,2103.790323  
4,2,2036.423913  
4,2,1769.288043  
4,2,8547.372093  
4,2,1829.990741  
4,2,1553.526163  
4,2,7795.962838  
4,2,3983.269886  
4,2,3596.185714  
4,2,4281.672131  
4,2,5629.311111  
4,2,1535.504902  
4,2,3959.196429  
4,2,2147.773585  
4,2,1846.799342  
4,2,7705.671779  
4,2,15074.427885  
4,2,1937.268293  
4,2,16600.973958  
4,2,1684.269231  
4,2,10987.250000  
4,2,2300.505814  
4,2,9026.946429

4,2,7665.013158  
4,2,4751.957447  
4,2,1947.625000  
4,2,1771.336735  
4,2,1564.697674  
4,2,5014.371901  
4,2,2019.990000  
4,2,2397.561224  
4,2,3678.601351  
4,2,3593.976190  
4,2,2792.425532  
4,2,3013.886111  
4,2,4072.619565  
4,2,2500.918750  
4,2,4919.640957  
4,2,1617.035714  
4,2,2070.562500  
4,2,6644.825980  
4,2,1609.409091  
4,2,3352.844444  
4,2,4612.607143  
4,2,3120.969388  
4,2,1513.620690  
4,2,5940.653061  
4,2,2658.285326  
4,2,3871.246875  
4,2,3735.864796  
4,2,4477.840000  
4,2,1936.156250  
4,2,2746.700000  
4,2,4774.100543  
4,2,3377.844595  
4,2,1591.846154  
4,2,5311.780556  
4,2,1790.049479  
4,2,1596.114286  
4,2,3007.525000  
4,2,2269.706731  
4,2,10513.812500  
4,2,2757.764706  
4,2,4432.857143  
4,2,4502.707447  
4,2,1671.450000  
4,2,2745.414474  
4,2,1600.911111  
4,2,5026.294872  
4,2,5699.875000  
4,2,1930.813830  
4,2,3803.500000  
4,2,3485.048295  
4,2,3276.651442  
4,2,2662.157407  
4,2,4262.648936  
4,2,1539.091216  
4,2,4495.375000  
4,2,4005.816327  
4,2,3056.966867  
4,2,1500.746269  
4,2,2676.046512  
4,2,1726.569767  
4,2,4006.920213  
4,2,1919.094444  
4,2,14843.700000  
4,2,1852.353659  
4,2,1707.194767  
4,2,1950.925000

4,2,6937.507812  
4,2,3208.080882  
4,2,8483.886364  
4,2,4260.564189  
4,2,4484.139423  
4,2,2399.739583  
4,2,3898.832500  
4,2,5302.787234  
4,2,4469.790698  
4,2,6592.000000  
4,2,12878.744898  
4,2,4455.674757  
4,2,1611.513514  
4,2,1707.848837  
4,2,4788.606383  
4,2,4472.002212  
4,2,4156.107558  
4,2,1969.881579  
4,2,10063.496711  
4,2,2564.031915  
4,2,1547.500000  
4,2,2130.289286  
4,2,2608.479651  
4,2,2105.733108  
4,2,1668.801020  
4,2,19000.497768  
4,2,1719.465909  
4,2,1525.429878  
4,2,3027.900000  
4,2,4274.093023  
4,2,1769.484694  
4,2,2821.100559  
4,2,2014.225806  
4,2,1532.506173  
4,2,17001.877358  
4,2,3075.729508  
4,2,3237.920213  
4,2,3214.026786  
4,2,1732.336957  
4,2,6760.590426  
4,2,3804.245902  
4,2,1676.390625  
4,2,1794.706897  
4,2,2868.702128  
4,2,3166.280488  
4,2,3827.384615  
4,2,5220.549419  
4,2,6506.750000  
4,2,3528.997283  
4,2,10369.769231  
4,2,5942.569079  
4,2,14673.000000  
4,2,2195.090116  
4,2,5237.633929  
4,2,3692.739796  
4,2,2520.836806  
4,2,1509.558140  
4,2,6082.571429  
4,2,9257.229167  
4,2,9222.451220  
4,2,6263.216981  
4,2,3167.400000  
4,2,1925.642857  
4,2,1605.560976  
4,2,3347.431818  
4,2,10827.618677

4,2,12352.552326  
4,2,2529.461538  
4,2,3466.822086  
4,2,2677.725610  
4,2,1838.522222  
4,2,10691.358974  
4,2,3680.661765  
4,2,2135.989362  
4,2,6566.583333  
4,2,3147.142857  
4,2,2773.533654  
4,2,2479.039634  
4,2,5826.716837  
4,2,3217.922794  
4,2,2836.078125  
4,2,9696.806122  
4,2,2683.312500  
4,2,1522.000000  
4,2,2522.320513  
4,2,3385.234043  
4,2,4802.850000  
4,2,3501.560811  
4,2,5444.380435  
4,2,2807.500000  
4,2,1688.619681  
4,2,1848.651163  
4,2,4570.101351  
4,2,2114.250000  
4,2,3533.916667  
4,2,5199.142857  
4,2,4803.028646  
4,2,1839.924342  
4,2,2255.597500  
4,2,3502.583333  
4,2,3923.264516  
4,2,2182.714286  
4,2,1595.254054  
4,2,1765.657143  
4,2,5595.565104  
4,2,7936.000000  
4,2,1863.630208  
4,2,4215.063830  
4,2,2220.125000  
4,2,2797.734043  
4,2,5691.689815  
4,2,3572.940397  
4,2,2706.424342  
4,2,1563.516026  
4,2,1801.493590  
4,2,3515.568182  
4,2,1540.164474  
4,2,2414.175000  
4,2,4883.378289  
4,2,8887.584184  
4,2,3129.867647  
4,2,2636.315789  
4,2,2031.742424  
4,2,2698.796460  
4,2,3877.136598  
4,2,4249.881188  
4,2,5318.683511  
4,2,12932.455882  
4,2,4929.777778  
4,2,9287.660377  
4,2,1887.552083  
4,2,8641.160377

4,2,2731.042254  
4,2,9977.211268  
4,2,2257.236111  
4,2,3887.413265  
4,2,3664.551020  
4,2,1531.750000  
4,2,1763.798780  
4,2,11170.235294  
4,2,3514.125000  
4,2,2442.397959  
4,2,6687.997596  
4,2,1527.464286  
4,2,3222.071429  
4,2,6205.178771  
4,2,4521.760000  
4,2,4938.500000  
4,2,1616.863281  
4,2,1646.233108  
4,2,1614.898438  
4,2,3843.000000  
4,2,3912.750000  
4,2,3988.176829  
4,2,6575.583333  
4,2,13041.380814  
4,2,4138.797297  
4,2,4087.020833  
4,2,5099.921875  
4,2,4255.777027  
4,2,3001.517857  
4,2,1796.804054  
4,2,2571.725000  
4,2,3008.609375  
4,2,5358.852941  
4,2,2399.845339  
4,2,1742.263473  
4,2,2807.857955  
4,2,4296.617647  
4,2,2016.488372  
4,2,5204.410000  
4,2,1674.292500  
4,2,2203.308824  
4,2,2001.887195  
4,2,1950.488636  
4,2,1613.842391  
4,2,2655.812500  
4,2,5773.142012  
4,2,3704.055556  
4,2,2624.822222  
4,2,1938.917553  
4,2,8275.653846  
4,2,5999.570946  
4,2,5068.419811  
4,2,2778.639706  
4,2,1891.454301  
4,2,3651.000000  
4,2,3721.840000  
4,2,1959.892157  
4,2,3281.460227  
4,2,2539.453125  
4,2,2287.790698  
4,2,2411.000000  
4,2,5738.241026  
4,2,3385.085890  
4,2,4410.169591  
4,2,2542.965909  
4,2,8486.620853

4,2,2454.412791  
4,2,4067.300000  
4,2,2071.537500  
4,2,2283.677632  
4,2,10685.617021  
4,2,3782.375000  
4,2,1629.581395  
4,2,1960.750000  
4,2,1706.511628  
4,2,7152.234375  
4,2,1702.560897  
4,2,2258.797170  
4,2,2398.829545  
4,2,2594.167553  
4,2,4696.571429  
4,2,9471.525000  
4,2,1719.000000  
4,2,5884.223958  
4,2,1500.000000  
4,2,1564.055000  
4,2,1799.702830  
4,2,3223.401163  
4,2,11043.214286  
4,2,1875.664062  
4,2,8011.097561  
4,2,2783.918367  
4,2,1843.854167  
4,2,10658.255208  
4,2,2716.802326  
4,2,1702.005435  
4,2,9732.212766  
4,2,9321.884470  
4,2,1625.450000  
4,2,3618.000000  
4,2,1714.139205  
4,2,8458.908654  
4,2,1982.656250  
4,2,3501.594828  
4,2,4805.726190  
4,2,2297.039634  
4,2,2680.195122  
4,2,4623.480769  
4,2,1985.040541  
4,2,2236.079327  
4,2,2129.352778  
4,2,2073.274194  
4,2,1805.572222  
4,2,4373.710106  
4,2,2148.100000  
4,2,1679.496875  
4,2,2036.125000  
4,2,2111.589286  
4,2,3627.923077  
4,2,4125.093023  
4,2,2358.743590  
4,2,2063.229947  
4,2,4709.125000  
4,2,1737.406250  
4,2,2533.117647  
4,2,6837.858173  
4,2,4970.823529  
4,2,3043.780405  
4,2,3145.329082  
4,2,4837.983796  
4,2,11712.579268  
4,2,3062.774390

4,2,1584.480676  
4,2,3554.901639  
4,2,1670.780612  
4,2,2966.217391  
4,2,1953.000000  
4,2,1780.431548  
4,2,4156.414894  
4,2,1678.125000  
4,2,2975.750000  
4,2,24171.894231  
4,2,10332.947115  
4,2,2136.406250  
4,2,1523.188679  
4,2,3851.416667  
4,2,11687.641827  
4,2,1781.595628  
4,2,13061.122396  
4,2,4003.157895  
4,2,5683.784884  
4,2,3636.375000  
4,2,4026.871711  
4,2,4825.234043  
4,2,14901.387500  
4,2,3600.552356  
4,2,4813.766509  
4,2,2771.242424  
4,2,2454.469512  
4,2,3321.348315  
4,2,2595.724432  
4,2,2432.022727  
4,2,11312.834302  
4,2,2347.000000  
4,2,6686.781250  
4,2,9540.367188  
4,2,4714.792857  
4,2,1788.086538  
4,2,2706.888889  
4,2,7616.157738  
4,2,1838.895408  
4,2,3031.145270  
4,2,2166.638298  
4,2,9297.932292  
4,2,2426.948370  
4,2,2640.785714  
4,2,3328.004902  
4,2,3521.519886  
4,2,4645.775641  
4,2,4574.710000  
4,2,23931.315000  
4,2,1982.487069  
4,2,2849.795918  
4,2,3229.590909  
4,2,2806.596591  
4,2,2269.292763  
4,2,1754.750000  
4,2,3678.526946  
4,2,2769.018868  
4,2,2414.711111  
4,2,5879.469388  
4,2,1750.895349  
4,2,6807.000000  
4,2,1573.675000  
4,2,24985.585938  
4,2,2526.000000  
4,2,2163.401316  
4,2,17631.204082

4,2,10716.094298  
4,2,5225.529412  
4,2,8323.000000  
4,2,1798.268750  
4,2,2053.440476  
4,2,3074.670455  
4,2,6234.043478  
4,2,11926.019231  
4,2,8096.941860  
4,2,2948.571429  
4,2,3013.401316  
4,2,3815.914894  
4,2,2547.875000  
4,2,5310.046512  
4,2,2501.861842  
4,2,19262.971154  
4,2,6090.750000  
4,2,5360.298387  
4,2,2286.490566  
4,2,2122.541667  
4,2,2047.279070  
4,2,1879.083333  
4,2,3078.571023  
4,2,1813.437126  
4,2,1883.375000  
4,2,4891.898936  
4,2,1513.883721  
4,2,1972.900000  
4,2,2969.332447  
4,2,3820.733696  
4,2,8352.438830  
4,2,1970.090426  
4,2,2128.000000  
4,2,2564.329609  
4,2,3492.598684  
4,2,7634.800000  
4,2,5235.787879  
4,2,4092.915000  
4,2,5013.888889  
4,2,2666.189573  
4,2,3238.490566  
4,2,3683.000000  
4,2,3291.904255  
4,2,6306.904070  
4,2,5452.377907  
4,2,2384.000000  
4,2,1982.161932  
4,2,5434.812500  
4,2,4754.882353  
4,2,3505.494565  
4,2,5664.153646  
4,2,2022.351190  
4,2,8601.008523  
4,2,5062.659574  
4,2,2013.275000  
4,2,3393.044444  
4,2,6870.565104  
4,2,1660.473684  
4,2,1875.250000  
4,2,1629.890728  
4,2,3919.401786  
4,2,1516.209770  
4,2,1512.294118  
4,2,3024.086957  
4,2,1898.634615  
4,2,2139.000000

4,2,1964.337500  
4,2,2814.117647  
4,2,2042.500000  
4,2,2798.700472  
4,2,3888.840909  
4,2,9277.875000  
4,2,1606.639881  
4,2,11049.201613  
4,2,1921.628289  
4,2,1953.937500  
4,2,2172.880952  
4,2,3129.906977  
4,2,8962.438679  
4,2,4002.732143  
4,2,10069.194231  
4,2,1560.107143  
4,2,1836.028571  
4,2,4280.041916  
4,2,2481.695122  
4,2,8655.993056  
4,2,3637.464674  
4,2,2154.425000  
4,2,3531.788889  
4,2,4057.018868  
4,2,2557.732143  
4,2,1639.097973  
4,2,2347.686275  
4,2,1766.000000  
4,2,4101.515625  
4,2,4135.407143  
4,2,2861.099490  
4,2,2999.062500  
4,2,1709.886598  
4,2,2707.989011  
4,2,4895.280000  
4,2,6427.995000  
4,2,7524.576923  
4,2,3007.256250  
4,2,4280.419811  
4,2,3571.142857  
4,2,5376.482143  
4,2,2198.085526  
4,2,2420.118750  
4,2,1568.875000  
4,2,6414.016026  
4,2,2725.372549  
4,2,2690.241477  
4,2,11612.538636  
4,2,2805.168919  
4,2,2932.949468  
4,2,2486.128205  
4,2,9092.023438  
4,2,3232.041667  
4,2,1689.611628  
4,2,6453.613636  
4,2,2768.150000  
4,2,4682.867925  
4,2,3042.147436  
4,2,4651.590625  
4,2,4271.041667  
4,2,2557.843137  
4,2,2301.596154  
4,2,4169.750000  
4,2,2568.701087  
4,2,7251.183824  
4,2,3374.461538

4,2,5909.109005  
4,2,13066.885417  
4,2,2122.145349  
4,2,1713.750000  
4,2,5179.633803  
4,2,3671.758389  
4,2,1876.714286  
4,2,1536.967532  
4,2,2285.301887  
4,2,2095.267857  
4,2,1749.318878  
4,2,3152.425000  
4,2,1505.230769  
4,2,1888.691489  
4,2,3685.802326  
4,2,1741.945755  
4,2,8426.204082  
4,2,4051.125000  
4,2,3220.280000  
4,2,7356.583333  
4,2,5255.993056  
4,2,2278.122159  
4,2,4581.398026  
4,2,3580.872685  
4,2,1743.657895  
4,2,4705.519231  
4,2,1663.047872  
4,2,5408.422111  
4,2,2127.634615  
4,2,8222.808140  
4,2,2261.794118  
4,2,2360.834395  
4,2,3807.130208  
4,2,1618.169444  
4,2,2882.754902  
4,2,2446.666667  
4,2,2704.701754  
4,2,2327.663194  
4,2,2889.052083  
4,2,2758.918129  
4,2,3127.188725  
4,2,2568.113208  
4,2,3356.000000  
4,2,1672.430233  
4,2,2849.412500  
4,2,1530.443182  
4,2,6286.732456  
4,2,1513.516026  
4,2,4775.054688  
4,2,3178.435897  
4,2,2665.617021  
4,2,4061.685185  
4,2,2396.455000  
4,2,2255.472973  
4,2,1955.296196  
4,2,3101.800532  
4,2,3094.125000  
4,2,2525.144737  
4,2,1731.500000  
4,2,7976.969388  
4,2,2553.000000  
4,2,8188.321429  
4,2,1866.935897  
4,2,4523.341837  
4,2,4058.396739  
4,2,3497.294872

4,2,2550.271739  
4,2,4070.519022  
4,2,4403.826087  
4,2,2243.257212  
4,2,1743.665625  
4,2,1958.962209  
4,2,1685.584135  
4,2,5583.335570  
4,2,1701.344828  
4,2,4206.402439  
4,2,17670.195652  
4,2,1638.675676  
4,2,2929.881250  
4,2,4216.093750  
4,2,3315.562500  
4,2,2587.000000  
4,2,2364.828125  
4,2,6253.393617  
4,2,1920.620000  
4,2,10837.809524  
4,2,1734.125000  
4,2,2542.522727  
4,2,5162.462500  
4,2,1533.281250  
4,2,2039.817073  
4,2,2600.625000  
4,2,4473.767857  
4,2,2878.250000  
4,2,1551.097222  
4,2,17353.164502  
4,2,5118.391061  
4,2,4472.385870  
4,2,2116.387500  
4,2,1592.479592  
4,2,2796.826087  
4,2,1984.371429  
4,2,6809.392694  
4,2,10644.366120  
4,2,5423.522727  
4,2,1508.494565  
4,2,3035.746875  
4,2,13586.875000  
4,2,6393.325581  
4,2,15527.107143  
4,2,2189.272727  
4,2,1592.777778  
4,2,1678.333333  
4,2,2991.899457  
4,2,1876.394231  
4,2,6890.844340  
4,2,1759.986842  
4,2,1532.560976  
4,2,5719.963362  
4,2,2664.697674  
4,2,3035.950000  
4,2,1627.409722  
4,2,8822.818182  
4,2,3744.886364  
4,2,2996.882812  
4,2,3150.114362  
4,2,2165.351064  
4,2,3445.156250  
4,2,1652.314103  
4,2,19354.491071  
4,2,2664.000000  
4,2,4193.263636

4,2,3901.506466  
4,2,1900.587500  
4,2,10617.362745  
4,2,7696.375000  
4,2,3167.705882  
4,2,4609.214286  
4,2,1874.329861  
4,2,6437.082317  
4,2,1610.100000  
4,2,1621.300000  
4,2,3723.976744  
4,2,3454.023649  
4,2,9137.312500  
4,2,8632.988636  
4,2,4760.025641  
4,2,3035.634146  
4,2,1622.755319  
4,2,5555.164894  
4,2,2135.944444  
4,2,2434.657051  
4,2,2518.604294  
4,2,2567.797872  
4,2,2129.731707  
4,2,3740.182500  
4,2,2456.662500  
4,2,4622.641304  
4,2,1586.570652  
4,2,3094.050000  
4,2,6105.068750  
4,2,1509.000000  
4,2,2439.788636  
4,2,2167.858209  
4,2,1706.294872  
4,2,1831.297297  
4,2,1532.422222  
4,2,2820.138365  
4,2,2664.673077  
4,2,5976.500000  
4,2,4776.093023  
4,2,1707.897959  
4,2,1723.113889  
4,2,3195.565217  
4,2,11716.670455  
4,2,1944.835366  
4,2,1572.414365  
4,2,2132.843023  
4,2,1832.041667  
4,2,6451.941935  
4,2,2477.250000  
4,2,3938.750000  
4,2,3002.513889  
4,2,5769.500000  
4,2,2290.427083  
4,2,3160.019231  
4,2,3655.100000  
4,2,3765.059783  
4,2,4170.634615  
4,2,1835.106383  
4,2,2198.177632  
4,2,2811.125000  
4,2,5177.151786  
4,2,2701.263158  
4,2,5043.883152  
4,2,1901.000000  
4,2,1695.914634  
4,2,2305.179775

4,2,3107.791667  
4,2,6098.533537  
4,2,3491.908602  
4,2,2219.886667  
4,2,4675.411058  
4,2,2673.304795  
4,2,7157.414474  
4,2,1556.771605  
4,2,4469.375000  
4,2,4886.033333  
4,2,3826.542553  
4,2,3751.860119  
4,2,2363.417647  
4,2,1595.714286  
4,2,5766.245098  
4,2,2075.211538  
4,2,4972.344595  
4,2,3225.720238  
4,2,3204.910326  
4,2,1851.067568  
4,2,3388.377907  
4,2,2376.384615  
4,2,1786.168919  
4,2,2969.217949  
4,2,2955.652174  
4,2,2263.281437  
4,2,7757.166667  
4,2,9228.897436  
4,2,19634.335443  
4,2,7033.078125  
4,2,1778.500000  
4,2,3793.810096  
4,2,3246.750000  
4,2,2658.605769  
4,2,1663.521277  
4,2,2441.187500  
4,2,8228.380319  
4,2,1590.461957  
4,2,1989.414894  
4,2,3562.775641  
4,2,2710.365385  
4,2,2310.763158  
4,2,1535.897436  
4,2,2382.063830  
4,2,3443.425000  
4,2,1986.442568  
4,2,2298.250000  
4,2,5197.237500  
4,2,3839.000000  
4,2,3080.347826  
4,2,3787.057018  
4,2,1822.068878  
4,2,5414.460526  
4,2,4242.188953  
4,2,5967.679487  
4,2,2617.300676  
4,2,1815.341216  
4,2,7557.485294  
4,2,4530.112745  
4,2,12193.342672  
4,2,2829.076531  
4,2,11835.057692  
4,2,1857.371875  
4,2,3511.210084  
4,2,2010.463235  
4,2,5777.305785

4,2,2320.184524  
4,2,3106.653846  
4,2,2203.600000  
4,2,10225.954082  
4,2,3156.278409  
4,2,8568.677778  
4,2,4606.250000  
4,2,3150.000000  
4,2,2222.996711  
4,2,2562.881579  
4,2,2108.544910  
4,2,2568.954268  
4,2,8419.000000  
4,2,15088.631579  
4,2,2875.561275  
4,2,5333.178571  
4,2,2575.968750  
4,2,2853.777778  
4,2,11174.318182  
4,2,2140.571429  
4,2,6532.934524  
4,2,4376.802469  
4,2,1860.505155  
4,2,2085.470588  
4,2,2972.923295  
4,2,1690.242021  
4,2,1756.982143  
4,2,2538.571429  
4,2,4863.323529  
4,2,3514.925000  
4,2,4615.234043  
4,2,3504.194444  
4,2,1979.683511  
4,2,5423.928571  
4,2,2282.918478  
4,2,1923.285714  
4,2,4239.922222  
4,2,3852.825000  
4,2,3246.923913  
4,2,2939.843137  
4,2,2192.696429  
4,2,1765.666667  
4,2,3641.785000  
4,2,4630.437500  
4,2,3340.981250  
4,2,1506.114865  
4,2,4855.765957  
4,2,1943.530405  
4,2,2388.858553  
4,2,3262.186047  
4,2,1859.719697  
4,2,8177.532895  
4,2,3463.867647  
4,2,33002.836735  
4,2,2349.609948  
4,2,2642.965278  
4,2,2614.779070  
4,2,11788.042308  
4,2,1774.364796  
4,2,2496.790816  
4,2,7897.485000  
4,2,2903.357143  
4,2,6440.983108  
4,2,3109.377778  
4,2,3668.254167  
4,2,9609.919118

4,2,4871.811224  
4,2,1817.604730  
4,2,2743.617647  
4,2,1979.071429  
4,2,6258.971698  
4,2,1526.542553  
4,2,3540.666667  
4,2,3035.540816  
4,2,2672.893617  
4,2,2731.568182  
4,2,2624.437500  
4,2,2486.509804  
4,2,4437.988636  
4,2,5297.000000  
4,2,2579.733333  
4,2,1881.593750  
4,2,1659.125000  
4,2,6036.211111  
4,2,4755.975610  
4,2,3583.250000  
4,2,1892.611413  
4,2,3086.608696  
4,2,1627.601064  
4,2,1672.943750  
4,2,2794.000000  
4,2,2624.468137  
4,2,5600.464286  
4,2,1844.608333  
4,2,9488.877907  
4,2,1815.551829  
4,2,3883.305556  
4,2,2691.357143  
4,2,2488.156250  
4,2,3946.237500  
4,2,1778.375000  
4,2,2013.661932  
4,2,3284.367925  
4,2,1838.750000  
4,2,2003.364865  
4,2,1633.981707  
4,2,2624.174419  
4,2,1636.729592  
4,2,1499.420732  
4,2,2238.295732  
4,2,2365.913043  
4,2,2899.487179  
4,2,2612.898810  
4,2,5289.950000  
4,2,4681.406250  
4,2,1790.181250  
4,2,1973.218750  
4,2,2026.980769  
4,2,4008.500000  
4,2,5288.321429  
4,2,1743.686111  
4,2,4994.000000  
4,2,1532.312500  
4,2,2417.960938  
4,2,3833.490385  
4,2,2505.727273  
4,2,4716.066667  
4,2,4874.687500  
4,2,2010.342500  
4,2,2970.027174  
4,2,2040.762195  
4,2,2500.553191

4,2,2236.428571  
4,2,1816.393293  
4,2,1590.472222  
4,2,3815.331633  
4,2,1962.235294  
4,2,3584.619565  
4,2,4643.513514  
4,2,2236.730769  
4,2,2938.687500  
4,2,2438.692308  
4,2,1764.500000  
4,2,6863.307692  
4,2,1526.608553  
4,2,1733.802885  
4,2,13793.948171  
4,2,2833.904891  
4,2,10032.904412  
4,2,2105.947368  
4,2,1870.283333  
4,2,9609.432500  
4,2,1629.642857  
4,2,2471.191919  
4,2,8624.286585  
4,2,3464.670732  
4,2,2774.727273  
4,2,2034.732143  
4,2,2559.294118  
4,2,1938.814516  
4,2,2626.696429  
4,2,8464.262019  
4,2,1623.959459  
4,2,1862.615132  
4,2,13724.954545  
4,2,3358.625000  
4,2,2000.421053  
4,2,1768.357143  
4,2,1558.033333  
4,2,6923.718750  
4,2,4563.250000  
4,2,1613.664634  
4,2,1645.291667  
4,2,1706.434211  
4,2,2631.830189  
4,2,2409.395833  
4,2,6363.969512  
4,2,2376.289894  
4,2,1615.701220  
4,2,3118.841667  
4,2,7280.140777  
4,2,2726.772727  
4,2,2377.367347  
4,2,3018.662791  
4,2,3905.152174  
4,2,3824.945312  
4,2,5149.418848  
4,2,2967.537879  
4,2,2705.086758  
4,2,1548.880795  
4,2,4655.081395  
4,2,1725.719512  
4,2,2106.212500  
4,2,3124.431250  
4,2,8428.431818  
4,2,1630.840909  
4,2,2537.268293  
4,2,6392.768293

4,2,2246.444444  
4,2,1790.950000  
4,2,3027.910377  
4,2,3186.317073  
4,2,3282.363636  
4,2,2567.875000  
4,2,7719.772727  
4,2,11444.880435  
4,2,102682.914110  
4,2,1712.360294  
4,2,6547.223485  
4,2,1575.966667  
4,2,5227.360465  
4,2,10082.422170  
4,2,3160.784722  
4,2,6328.866667  
4,2,4812.962766  
4,2,6998.604651  
4,2,2271.923077  
4,2,2454.644886  
4,2,1566.550000  
4,2,2113.826087  
4,2,2311.330049  
4,2,2960.035714  
4,2,1575.000000  
4,2,3791.442623  
4,2,4585.184211  
4,2,2721.407051  
4,2,2775.421053  
4,2,2154.710526  
4,2,4150.654054  
4,2,1754.972678  
4,2,1775.663265  
4,2,9177.495192  
4,2,1849.087209  
4,2,1728.285714  
4,2,1513.423077  
4,2,15783.375000  
4,2,2522.843750  
4,2,5213.244681  
4,2,8917.012755  
4,2,2051.118421  
4,2,4499.551887  
4,2,1991.637097  
4,2,3432.520349  
4,2,1990.247423  
4,2,1513.642857  
4,2,3245.089744  
4,2,6467.012195  
4,2,6592.660377  
4,2,9949.659389  
4,2,2669.082474  
4,2,2339.266667  
4,2,1978.584337  
4,2,2087.677083  
4,2,3507.397727  
4,2,2352.038462  
4,2,2059.033816  
4,2,3425.186275  
4,2,2528.336538  
4,2,2037.125000  
4,2,3315.574074  
4,2,1910.763158  
4,2,2084.547872  
4,2,24793.172897  
4,2,2730.000000

4,2,3773.884868  
4,2,2892.054688  
4,2,6609.541667  
4,2,4228.378378  
4,2,2861.994565  
4,2,1669.669643  
4,2,3720.186275  
4,2,1683.363095  
4,2,2677.488426  
4,2,3631.420455  
4,2,1808.324405  
4,2,1999.021875  
4,2,13412.668605  
4,2,1613.875000  
4,2,3085.850543  
4,2,6073.048077  
4,2,2004.039216  
4,2,2143.895349  
4,2,3628.428571  
4,2,2740.567308  
4,2,4979.750000  
4,2,4587.950000  
4,2,7023.063953  
4,2,5165.372340  
4,2,4487.578125  
4,2,2979.481818  
4,2,4624.424342  
4,2,8598.605263  
4,2,2413.333333  
4,2,3734.275000  
4,2,2047.200000  
4,2,2023.150754  
4,2,1505.576389  
4,2,5365.884615  
4,2,4007.782051  
4,2,4133.661765  
4,2,2401.494565  
4,2,1678.277500  
4,2,1548.875000  
4,2,2556.901163  
4,2,6528.000000  
4,2,1697.426339  
4,2,3090.612245  
4,2,2637.813636  
4,2,2749.908163  
4,2,8465.397059  
4,2,2327.046875  
4,2,1595.179348  
4,2,3353.000000  
4,2,4739.787500  
4,2,5834.375000  
4,2,6797.858696  
4,2,6991.700000  
4,2,3483.923077  
4,2,2988.726563  
4,2,2632.076705  
4,2,1758.791667  
4,2,9951.852941  
4,2,3642.847826  
4,2,2602.959459  
4,2,4854.931548  
4,2,11467.566502  
4,2,5465.032086  
4,2,1942.164773  
4,2,2025.283251  
4,2,1603.325581

4,2,2452.921182  
4,2,1632.952381  
4,2,6910.723214  
4,2,6781.391304  
4,2,2436.325000  
4,2,3710.428571  
4,2,1889.727941  
4,2,5832.636364  
4,2,2570.899457  
4,2,2635.722561  
4,2,5204.872449  
4,2,2427.422222  
4,2,4695.362500  
4,2,2058.111702  
4,2,3287.497093  
4,2,2632.914894  
4,2,10406.270270  
4,2,3876.250000  
4,2,1792.429688  
4,2,2022.540816  
4,2,1732.509375  
4,2,3428.794643  
4,2,3034.817308  
4,2,3950.759259  
4,2,2266.782895  
4,2,6169.077419  
4,2,2198.125000  
4,2,3569.006098  
4,2,1593.822222  
4,2,3007.528846  
4,2,1813.383152  
4,2,2113.259615  
4,2,8766.081522  
4,2,6154.734043  
4,2,29288.294479  
4,2,5374.295455  
4,2,7334.229592  
4,2,2300.178571  
4,2,4243.750000  
4,2,4700.108571  
4,2,1794.608040  
4,2,4865.761905  
4,2,14527.181818  
4,2,8405.700000  
4,2,1908.203209  
4,2,2110.562500  
4,2,3699.495000  
4,2,1552.293919  
4,2,3285.944444  
4,2,5415.983766  
4,2,1554.081395  
4,2,3257.157895  
4,2,3080.465116  
4,2,2290.825000  
4,2,2843.617021  
4,2,3542.055288  
4,2,4624.408163  
4,2,4489.511628  
4,2,2311.924419  
4,2,2193.964912  
4,2,3898.911058  
4,2,5361.937500  
4,2,9287.780488  
4,2,3027.297222  
4,2,2726.682432  
4,2,5227.669118

4,2,7649.089286  
4,2,3861.538462  
4,2,2063.336538  
4,2,5203.616279  
4,2,1580.158854  
4,2,1545.107558  
4,2,8494.282051  
4,2,3500.521739  
4,2,3158.547297  
4,2,4749.472826  
4,2,2080.010204  
4,2,2299.453390  
4,2,3305.591837  
4,2,2219.398649  
4,2,2153.602679  
4,2,2401.309375  
4,2,3820.361702  
4,2,2164.453125  
4,2,2425.705882  
4,2,7544.330882  
4,2,2613.060976  
4,2,2283.128205  
4,2,1722.875000  
4,2,2140.425532  
4,2,1554.615385  
4,2,3126.843750  
4,2,2030.700000  
4,2,6883.142857  
4,2,4801.216837  
4,2,3062.090000  
4,2,4194.441489  
4,2,1798.682927  
4,2,1867.239286  
4,2,1842.508721  
4,2,3014.410256  
4,2,10278.808333  
4,2,1959.656442  
4,2,6885.702128  
4,2,2726.333333  
4,2,1906.702128  
4,2,2639.871795  
4,2,3054.315789  
4,2,3517.152174  
4,2,1942.858553  
4,2,1636.666667  
4,2,3762.467391  
4,2,3373.737179  
4,2,3144.622596  
4,2,1794.721088  
4,2,4359.441860  
4,2,2600.298077  
4,2,6953.796512  
4,2,11901.375000  
4,2,2031.490625  
4,2,7498.753555  
4,2,3091.872340  
4,2,2926.284884  
4,2,1556.616580  
4,2,2249.040761  
4,2,2004.808333  
4,2,2856.135638  
4,2,2121.631579  
4,2,1611.919355  
4,2,3142.095745  
4,2,4430.433511  
4,2,2495.437500

4,2,5656.602041  
4,2,2285.310976  
4,2,1907.940828  
4,2,1766.750000  
4,2,2926.424569  
4,2,8616.027273  
4,2,3080.880240  
4,2,1657.392442  
4,2,6586.586957  
4,2,6117.179245  
4,2,1821.978610  
4,2,4633.683544  
4,2,1703.909091  
4,2,4759.512712  
4,2,2840.021277  
4,2,1983.192308  
4,2,2584.017045  
4,2,2002.596591  
4,2,2232.632979  
4,2,1954.707237  
4,2,3785.535256  
4,2,4774.679245  
4,2,1543.638554  
4,2,1984.030822  
4,2,2591.030000  
4,2,3284.643519  
4,2,5656.548780  
4,2,2294.092593  
4,2,3675.024510  
4,2,1962.465625  
4,2,5914.631579  
4,2,3708.916667  
4,2,2908.162162  
4,2,2227.180556  
4,2,11643.593750  
4,2,2249.502500  
4,2,1743.502907  
4,2,3158.864865  
4,2,2182.875000  
4,2,2205.095745  
4,2,3321.500000  
4,2,2388.502907  
4,2,7617.843750  
4,2,5019.546296  
4,2,6133.878049  
4,2,1525.862500  
4,2,5771.851744  
4,2,1665.770349  
4,2,2479.884615  
4,2,1791.187500  
4,2,2832.166667  
4,2,3454.083333  
4,2,2146.313725  
4,2,2162.811224  
4,2,1540.275862  
4,2,3932.477778  
4,2,1540.195652  
4,2,2566.090909  
4,2,3480.294872  
4,2,12007.962025  
4,2,1844.375000  
4,2,1519.923077  
4,2,2555.530405  
4,2,1559.538462  
4,2,6934.202830  
4,2,1793.241379

4,2,3157.478261  
4,2,6592.008333  
4,2,2161.600000  
4,2,2723.625000  
4,2,1715.600000  
4,2,1908.211310  
4,2,2528.524510  
4,2,3628.581522  
4,2,7270.340000  
4,2,4703.666667  
4,2,3052.119565  
4,2,10752.024390  
4,2,1731.273256  
4,2,2542.442568  
4,2,4030.943182  
4,2,5043.459239  
4,2,4551.519231  
4,2,3353.259434  
4,2,4077.884868  
4,2,2574.500000  
4,2,7460.037234  
4,2,1611.578125  
4,2,1865.186321  
4,2,1720.422297  
4,2,1791.500000  
4,2,1963.822917  
4,2,16019.328431  
4,2,1766.206522  
4,2,3039.153846  
4,2,2046.337500  
4,2,4563.102273  
4,2,2215.409091  
4,2,3454.670455  
4,2,11565.178571  
4,2,4115.222222  
4,2,1533.750000  
4,2,2079.468750  
4,2,1984.437500  
4,2,4922.886364  
4,2,7253.653646  
4,2,11759.500000  
4,2,6121.961538  
4,2,1616.340625  
4,2,1818.848837  
4,2,2816.652174  
4,2,7447.116352  
4,2,1583.134375  
4,2,2032.557377  
4,2,2618.407407  
4,2,6907.564732  
4,2,8949.877358  
4,2,1870.393750  
4,2,1755.634615  
4,2,1575.000000  
4,2,1624.574468  
4,2,4354.742021  
4,2,4833.286184  
4,2,4883.366071  
4,2,1969.867647  
4,2,3716.741477  
4,2,1865.847727  
4,2,2835.524390  
4,2,2767.964912  
4,2,23068.141256  
4,2,4539.933036  
4,2,6655.975610

4,2,6294.652027  
4,2,5591.696809  
4,2,4542.396341  
4,2,1702.058511  
4,2,2334.728261  
4,2,3406.743590  
4,2,1872.058511  
4,2,1749.162162  
4,2,2447.127660  
4,2,2905.881517  
4,2,1748.488372  
4,2,1553.735294  
4,2,2650.074468  
4,2,3460.369863  
4,2,1933.511628  
4,2,2839.460432  
4,2,2605.400000  
4,2,2372.022059  
4,2,4670.676471  
4,2,2148.132979  
4,2,2702.015625  
4,2,12520.340426  
4,2,2186.342391  
4,2,1719.425000  
4,2,2089.800000  
4,2,6257.108333  
4,2,6958.776596  
4,2,2994.621795  
4,2,2361.625000  
4,2,6864.671053  
4,2,1798.405405  
4,2,2374.109694  
4,2,7902.883721  
4,2,2137.250000  
4,2,2254.119186  
4,2,2568.812500  
4,2,1985.047297  
4,2,2216.786458  
4,2,2031.308511  
4,2,3025.163462  
4,2,3992.316038  
4,2,4528.344595  
4,2,2494.116279  
4,2,1532.043919  
4,2,3854.042683  
4,2,8731.031250  
4,2,2598.870000  
4,2,3617.634868  
4,2,3016.320755  
4,2,4346.066176  
4,2,10194.936170  
4,2,3132.555556  
4,2,1641.942446  
4,2,5584.122754  
4,2,5618.331551  
4,2,2362.472561  
4,2,2764.486842  
4,2,2092.976190  
4,2,2429.516304  
4,2,2571.115385  
4,2,1634.776316  
4,2,1961.551136  
4,2,2818.664773  
4,2,1987.256098  
4,2,6290.941520  
4,2,2491.770161

4,2,4707.691542  
4,2,1671.881579  
4,2,5320.458763  
4,2,3236.338028  
4,2,2662.937500  
4,2,6308.588235  
4,2,9571.108108  
4,2,1732.164474  
4,2,4899.299020  
4,2,2363.581081  
4,2,1610.200000  
4,2,2170.389535  
4,2,7407.506579  
4,2,2346.884615  
4,2,2364.048077  
4,2,6710.562500  
4,2,3032.151042  
4,2,3808.390244  
4,2,3189.583333  
4,2,4860.388889  
4,2,3916.646226  
4,2,4495.530405  
4,2,1824.692308  
4,2,6190.730769  
4,2,2044.005556  
4,2,1609.093750  
4,2,3249.785000  
4,2,1767.475610  
4,2,3333.508772  
4,2,2626.845109  
4,2,1829.959184  
4,2,2473.585106  
4,2,3040.217593  
4,2,4383.992021  
4,2,1600.507143  
4,2,1849.390625  
4,2,1713.152778  
4,2,1579.190476  
4,2,2847.329787  
4,2,2931.198864  
4,2,1752.684211  
4,2,1595.426471  
4,2,7681.549020  
4,2,2350.410714  
4,2,8955.839912  
4,2,4529.802326  
4,2,1639.434211  
4,2,2358.853659  
4,2,2439.462766  
4,2,3366.898936  
4,2,7916.403125  
4,2,2820.390244  
4,2,3953.521930  
4,2,5893.031915  
4,2,15803.696429  
4,2,7015.642045  
4,2,4690.452830  
4,2,4132.656915  
4,2,2487.590909  
4,2,2643.660526  
4,2,1537.836538  
4,2,3865.750000  
4,2,3257.110656  
4,2,1607.625000  
4,2,3885.338415  
4,2,3141.478723

4,2,1807.729730  
4,2,2557.514881  
4,2,5567.409091  
4,2,4630.354592  
4,2,1955.502841  
4,2,3651.375000  
4,2,3663.325000  
4,2,4934.040984  
4,2,9688.669811  
4,2,2304.832237  
4,2,4033.383333  
4,2,14527.360577  
4,2,4431.997340  
4,2,6101.446429  
4,2,3141.916667  
4,2,1882.461538  
4,2,1726.829545  
4,2,2309.750000  
4,2,8396.500000  
4,2,1644.250000  
4,2,5612.423077  
4,2,1971.040541  
4,2,1843.086538  
4,2,6001.072115  
4,2,2556.581395  
4,2,2189.944444  
4,2,7143.687500  
4,2,1704.931034  
4,2,2883.650943  
4,2,3648.769737  
4,2,1911.631579  
4,2,2223.791667  
4,2,1571.411765  
4,2,1830.425532  
4,2,14378.971875  
4,2,1714.411765  
4,2,4190.437500  
4,2,3047.511628  
4,2,2912.212838  
4,2,2847.128049  
4,2,4190.989362  
4,2,3515.416667  
4,2,2322.435976  
4,2,2982.577381  
4,2,1656.500000  
4,2,3121.625000  
4,2,5938.441176  
4,2,1608.601351  
4,2,1878.912500  
4,2,15916.969388  
4,2,2400.243056  
4,2,1903.560811  
4,2,2815.531250  
4,2,6994.341667  
4,2,4186.577778  
4,2,3746.320225  
4,2,30361.610465  
4,2,2136.652174  
4,2,2317.909574  
4,2,4501.956019  
4,2,4009.487805  
4,2,2074.900000  
4,2,2104.698864  
4,2,5235.272727  
4,2,1633.487179  
4,2,2477.027273

4,2,1875.275000  
4,2,1622.976744  
4,2,2008.557377  
4,2,1940.350000  
4,2,2205.567308  
4,2,2096.523256  
4,2,2977.263889  
4,2,7057.237500  
4,2,3172.479167  
4,2,3339.191860  
4,2,5773.529412  
4,2,8606.189024  
4,2,1550.100000  
4,2,1588.246914  
4,2,3130.698113  
4,2,1940.775568  
4,2,9267.000000  
4,2,2510.772727  
4,2,1842.378289  
4,2,1786.289634  
4,2,5368.291667  
4,2,2593.461538  
4,2,3707.079618  
4,2,12734.365517  
4,2,3499.692308  
4,2,2139.654762  
4,2,3052.597222  
4,2,2250.625000  
4,2,11333.136111  
4,2,1829.594595  
4,2,4349.304545  
4,2,2090.444444  
4,2,1892.615385  
4,2,3149.391304  
4,2,2069.481818  
4,2,2919.237745  
4,2,7604.131466  
4,2,2449.007143  
4,2,9072.865854  
4,2,1548.800000  
4,2,10126.030660  
4,2,1959.905172  
4,2,2988.149038  
4,2,1566.423611  
4,2,2798.802885  
4,2,2103.500000  
4,2,29837.919444  
4,2,12108.559659  
4,2,1625.388889  
4,2,4546.625749  
4,2,2487.272947  
4,2,4631.336538  
4,2,2157.384615  
4,2,3435.713450  
4,2,4599.063636  
4,2,18511.400000  
4,2,2676.933333  
4,2,3940.358491  
4,2,1736.219388  
4,2,2059.093023  
4,2,1892.833333  
4,2,2060.694712  
4,2,5551.100000  
4,2,6915.134259  
4,2,3047.020408  
4,2,1853.809524

4,2,2001.739362  
4,2,4872.412500  
4,2,8905.083333  
4,2,3813.200000  
4,2,3648.612745  
4,2,1961.100000  
4,2,4596.673913  
4,2,3617.114865  
4,2,9398.605000  
4,2,3550.871795  
4,2,1975.970588  
4,2,2073.723684  
4,2,8487.682432  
4,2,3151.952381  
4,2,5236.118750  
4,2,13389.761905  
4,2,2866.475543  
4,2,6461.750000  
4,2,1832.296512  
4,2,2092.000000  
4,2,2029.800000  
4,2,2779.138158  
4,2,2143.406250  
4,2,8541.877551  
4,2,4385.183824  
4,2,1691.145833  
4,2,3989.175000  
4,2,2066.736486  
4,2,2666.906977  
4,2,1667.281496  
4,2,9752.625000  
4,2,2003.330882  
4,2,1550.106383  
4,2,3261.574713  
4,2,3694.000000  
4,2,1521.908163  
4,2,2378.219101  
4,2,2286.285714  
4,2,1551.488372  
4,2,5645.685897  
4,2,5019.914062  
4,2,4677.500000  
4,2,2401.941860  
4,2,1846.869048  
4,2,1875.153409  
4,2,2153.879808  
4,2,3072.062500  
4,2,1883.594595  
4,2,3156.404040  
4,2,1761.412500  
4,2,4114.437500  
4,2,1796.993750  
4,2,2378.250000  
4,2,1858.500000  
4,2,1718.727273  
4,2,2442.875000  
4,2,5364.895833  
4,2,2005.255319  
4,2,1532.101974  
4,2,5642.450000  
4,2,3826.805556  
4,2,2536.063830  
4,2,11448.643357  
4,2,2451.945000  
4,2,2153.943182  
4,2,8986.846875

4,2,2744.856250  
4,2,2597.644444  
4,2,5041.128205  
4,2,1570.628125  
4,2,6570.698864  
4,2,2531.625000  
4,2,2029.638889  
4,2,3412.779412  
4,2,2054.960227  
4,2,3032.994681  
4,2,4064.510000  
4,2,3493.575000  
4,2,4224.075000  
4,2,7600.027027  
4,2,2873.945946  
4,2,7073.864198  
4,2,1537.820261  
4,2,1724.533784  
4,2,5283.346154  
4,2,3198.951087  
4,2,3603.761905  
4,2,2206.750000  
4,2,2899.540881  
4,2,1949.494681  
4,2,2021.266332  
4,2,8792.237885  
4,2,2031.264398  
4,2,2221.875000  
4,2,5775.477564  
4,2,2688.864078  
4,2,2070.453488  
4,2,2154.400000  
4,2,16047.389151  
4,2,1782.663462  
4,2,1573.815789  
4,2,3139.098522  
4,2,25111.663462  
4,2,1546.644231  
4,2,2147.614362  
4,2,3909.161290  
4,2,4955.974843  
4,2,2291.594512  
4,2,1698.297297  
4,2,13139.700000  
4,2,10013.712500  
4,2,2582.529412  
4,2,1745.281250  
4,2,7593.785714  
4,2,3349.049479  
4,2,5680.500000  
4,2,2448.108974  
4,2,1844.161765  
4,2,1851.386792  
4,2,2422.980769  
4,2,2639.250000  
4,2,2112.163043  
4,2,4010.538690  
4,2,3495.500000  
4,2,2129.094340  
4,2,1619.085526  
4,2,2490.780000  
4,2,1906.688889  
4,2,5719.338415  
4,2,2475.082011  
4,2,1671.596154  
4,2,1759.031250

4,2,1985.810976  
4,2,3324.406915  
4,2,3745.840426  
4,2,2750.230769  
4,2,2309.892857  
4,2,1889.750000  
4,2,3926.937500  
4,2,3763.173077  
4,2,2287.237179  
4,2,2128.057432  
4,2,2158.040698  
4,2,1531.518939  
4,2,6162.621622  
4,2,3367.269737  
4,2,2416.793605  
4,2,3839.166667  
4,2,4744.542714  
4,2,2710.696721  
4,2,1710.355769  
4,2,1876.933673  
4,2,5306.640625  
4,2,1656.112500  
4,2,4160.381250  
4,2,3856.178571  
4,2,2613.218137  
4,2,3228.547170  
4,2,7040.586310  
4,2,5215.445652  
4,2,2319.788462  
4,2,2554.790698  
4,2,3291.997596  
4,2,6419.340909  
4,2,2172.556818  
4,2,2517.843750  
4,2,2802.491477  
4,2,2940.453125  
4,2,2279.782609  
4,2,3205.347826  
4,2,1853.987903  
4,2,5490.804020  
4,2,2058.888889  
4,2,5882.960227  
4,2,11918.977273  
4,2,2953.307692  
4,2,3342.330000  
4,2,6492.116667  
4,2,3362.145833  
4,2,2291.500000  
4,2,3118.718750  
4,2,4080.453488  
4,2,1717.911765  
4,2,1841.500000  
4,2,2791.459459  
4,2,1703.444149  
4,2,2846.613636  
4,2,3918.996951  
4,2,6318.500000  
4,2,3106.121429  
4,2,2498.602273  
4,2,10573.847826  
4,2,2276.375000  
4,2,4033.737500  
4,2,1503.982143  
4,2,3100.961538  
4,2,2552.107143  
4,2,4906.636792

4,2,2721.797222  
4,2,15288.295918  
4,2,2395.625000  
4,2,4088.343750  
4,2,2977.200549  
4,2,1528.956897  
4,2,2511.645833  
4,2,2815.750000  
4,2,2066.500000  
4,2,1789.823980  
4,2,1698.838235  
4,2,2737.850000  
4,2,1873.493056  
4,2,53174.000000  
4,2,2989.687500  
4,2,4197.047297  
4,2,2743.441860  
4,2,1565.000000  
4,2,2248.115385  
4,2,2139.845395  
4,2,3919.333333  
4,2,1911.597087  
4,2,1651.225000  
4,2,9922.018293  
4,2,2304.827869  
4,2,2768.011364  
4,2,2714.854545  
4,2,2165.071429  
4,2,3162.740196  
4,2,7441.950000  
4,2,15103.175439  
4,2,2337.222222  
4,2,4488.038043  
4,2,2684.250000  
4,2,1978.992021  
4,2,2312.889205  
4,2,2001.144231  
4,2,3163.520833  
4,2,2719.593596  
4,2,2540.743961  
4,2,2768.968750  
4,2,6963.607500  
4,2,11285.200000  
4,2,1733.923077  
4,2,4783.760000  
4,2,2644.306250  
4,2,3911.687500  
4,2,1575.137255  
4,2,4103.775000  
4,2,2995.054878  
4,2,3396.806122  
4,2,2942.928571  
4,2,3269.291667  
4,2,4368.315217  
4,2,5240.040323  
4,2,2833.636905  
4,2,1736.372340  
4,2,9642.067073  
4,2,40699.625000  
4,2,7489.178571  
4,2,1919.159091  
4,2,2720.745370  
4,2,2851.879545  
4,2,4034.707237  
4,2,3883.492188  
4,2,8782.515625

4,2,3314.467391  
4,2,3444.178571  
4,2,2176.134146  
4,2,2361.304348  
4,2,2390.070652  
4,2,1813.515152  
4,2,1902.125000  
4,2,2260.640000  
4,2,3240.341463  
4,2,4261.555556  
4,2,2713.663265  
4,2,2069.872093  
4,2,5408.695652  
4,2,10528.011905  
4,2,1732.821429  
4,2,2499.883495  
4,2,3256.776442  
4,2,2034.954545  
4,2,1809.000000  
4,2,11263.375000  
4,2,4374.020408  
4,2,1882.000000  
4,2,10124.891667  
4,2,1764.471591  
4,2,1537.105263  
4,2,13597.657143  
4,2,1765.000000  
4,2,5128.477273  
4,2,1950.793750  
4,2,2554.135417  
4,2,1968.064103  
4,2,3336.130682  
4,2,1861.152174  
4,2,2793.725694  
4,2,1875.163462  
4,2,2953.900000  
4,2,3129.574468  
4,2,7751.805233  
4,2,2177.864865  
4,2,4708.920000  
4,2,2251.250000  
4,2,3457.069767  
4,2,3215.865854  
4,2,2579.525000  
4,2,5627.642857  
4,2,1648.494898  
4,2,10106.000000  
4,2,2771.587838  
4,2,2978.121429  
4,2,1574.539474  
4,2,5995.750000  
4,2,1579.116667  
4,2,7534.173913  
4,2,9851.294118  
4,2,4026.222222  
4,2,13186.889423  
4,2,4254.822917  
4,2,3557.994898  
4,2,1964.000000  
4,2,4509.117021  
4,2,1622.534884  
4,2,1506.277344  
4,2,3496.213542  
4,2,5950.707237  
4,2,1563.638587  
4,2,4908.528846

4,2,3025.835227  
4,2,4049.965625  
4,2,3137.660377  
4,2,2336.889535  
4,2,1709.693878  
4,2,6822.278689  
4,2,4609.560606  
4,2,3621.760000  
4,2,54831.325658  
4,2,7877.081731  
4,2,12013.807692  
4,2,11841.271277  
4,2,4316.034574  
4,2,3279.187500  
4,2,6387.430851  
4,2,1810.529412  
4,2,2521.637681  
4,2,2406.119565  
4,2,4827.406250  
4,2,3168.708333  
4,2,3274.100000  
4,2,2327.761364  
4,2,1768.722973  
4,2,1570.637195  
4,2,1625.658537  
4,2,2462.325581  
4,2,5562.557692  
4,2,2004.467500  
4,2,1896.878049  
4,2,3339.888889  
4,2,9068.174419  
4,2,2541.654661  
4,2,2399.875000  
4,2,3773.582938  
4,2,1767.725490  
4,2,9531.232955  
4,2,13753.522346  
4,2,4722.330189  
4,2,2891.656250  
4,2,1976.918478  
4,2,7312.703804  
4,2,1541.848214  
4,2,1650.019651  
4,2,1779.450581  
4,2,16242.288043  
4,2,2060.058333  
4,2,4700.680851  
4,2,1519.668269  
4,2,2243.906977  
4,2,1897.525000  
4,2,1724.261364  
4,2,1747.000000  
4,2,2065.357143  
4,2,1790.377358  
4,2,3049.719512  
4,2,2261.685714  
4,2,1655.878049  
4,2,3614.418367  
4,2,3120.330882  
4,2,2988.100543  
4,2,2792.619565  
4,2,9153.335000  
4,2,3636.245098  
4,2,4307.173077  
4,2,2372.593750  
4,2,2461.163889

4,2,2940.943182  
4,2,2972.076923  
4,2,2767.863889  
4,2,3988.988636  
4,2,2206.750000  
4,2,4194.500000  
4,2,1774.517442  
4,2,2342.961538  
4,2,8146.363636  
4,2,2819.401596  
4,2,3747.194712  
4,2,1996.462963  
4,2,1910.297101  
4,2,2481.825000  
4,2,2047.587766  
4,2,2054.000000  
4,2,3621.794118  
4,2,2516.448980  
4,2,3413.189024  
4,2,1526.055851  
4,2,1571.128205  
4,2,2383.381098  
4,2,3732.736413  
4,2,4306.937500  
4,2,6346.368902  
4,2,2372.887931  
4,2,1519.215909  
4,2,4600.500000  
4,2,2162.401042  
4,2,5622.108173  
4,2,5805.575472  
4,2,1800.750000  
4,2,1638.674419  
4,2,1839.653846  
4,2,3071.673684  
4,2,1543.668605  
4,2,3171.072222  
4,2,1625.250000  
4,2,2089.556548  
4,2,2964.420455  
4,2,2372.434783  
4,2,2133.011905  
4,2,3806.020000  
4,2,2611.659091  
4,2,2798.512195  
4,2,3104.739286  
4,2,1680.215580  
4,2,2619.173780  
4,2,2756.888889  
4,2,3116.671875  
4,2,1651.060976  
4,2,2878.352273  
4,2,4699.933190  
4,2,4830.645161  
4,2,4836.928879  
4,2,1832.692308  
4,2,4245.660000  
4,2,2010.790055  
4,2,2894.982234  
4,2,7488.877551  
4,2,8000.405556  
4,2,2642.520349  
4,2,6195.190789  
4,2,5027.668750  
4,2,3411.117647  
4,2,1607.198529

4,2,7272.894022  
4,2,2933.897959  
4,2,14757.939815  
4,2,1556.090909  
4,2,6612.413462  
4,2,1805.000000  
4,2,5338.701531  
4,2,7914.931034  
4,2,2422.017857  
4,2,1904.259146  
4,2,12204.560345  
4,2,3053.419872  
4,2,1598.908537  
4,2,3336.512500  
4,2,1595.465909  
4,2,10100.851923  
4,2,2199.841667  
4,2,2212.520000  
4,2,2701.625000  
4,2,1561.562500  
4,2,4365.020408  
4,2,1550.318182  
4,2,5483.589385  
4,2,10930.056604  
4,2,2247.000000  
4,2,5292.807870  
4,2,3513.862500  
4,2,1704.235294  
4,2,8369.286364  
4,2,1912.505208  
4,2,7491.157895  
4,2,2969.529412  
4,2,2087.142857  
4,2,10524.421875  
4,2,2842.602564  
4,2,5268.318182  
4,2,2150.778846  
4,2,1775.812500  
4,2,7804.265625  
4,2,8556.217391  
4,2,4693.014535  
4,2,2507.166667  
4,2,1675.804020  
4,2,3689.698370  
4,2,6617.125000  
4,2,6040.448980  
4,2,4088.315625  
4,2,2579.920000  
4,2,1964.559748  
4,2,3417.547619  
4,2,1772.644737  
4,2,3385.086420  
4,2,2223.575269  
4,2,7014.976744  
4,2,2435.419872  
4,2,2314.520349  
4,2,1796.494898  
4,2,3019.051724  
4,2,2113.085938  
4,2,4354.113839  
4,2,1662.920000  
4,2,4433.629412  
4,2,2257.813218  
4,2,4928.372727  
4,2,2719.915541  
4,2,7183.347826

4,2,4679.887500  
4,2,26471.687500  
4,2,1503.532258  
4,2,4320.994318  
4,2,11960.228723  
4,2,2441.674888  
4,2,8427.981735  
4,2,2918.372449  
4,2,2143.166667  
4,2,1571.505435  
4,2,2371.817308  
4,2,1877.191176  
4,2,25572.214674  
4,2,1602.096939  
4,2,3237.634146  
4,2,2442.937500  
4,2,3128.931818  
4,2,5481.091216  
4,2,6028.460227  
4,2,15722.890625  
4,2,3451.512500  
4,2,2871.653846  
4,2,2074.937500  
4,2,1593.890625  
4,2,1546.366848  
4,2,2224.278302  
4,2,1792.847826  
4,2,6173.946429  
4,2,9197.415625  
4,2,1864.567568  
4,2,1716.029661  
4,2,2496.705882  
4,2,11188.430233  
4,2,2065.554878  
4,2,4144.769231  
4,2,2044.213235  
4,2,7784.718182  
4,2,2407.214286  
4,2,1712.291667  
4,2,6908.278894  
4,2,2957.674419  
4,2,3031.750000  
4,2,3526.196429  
4,2,2301.952381  
4,2,7862.112676  
4,2,3673.774194  
4,2,1606.763158  
4,2,7021.353659  
4,2,5480.505682  
4,2,1626.934783  
4,2,3997.493056  
4,2,1841.488636  
4,2,1537.860465  
4,2,4842.252717  
4,2,1523.923077  
4,2,15259.230769  
4,2,1822.625000  
4,2,2397.198370  
4,2,4148.784722  
4,2,3305.312500  
4,2,14873.937500  
4,2,2604.975610  
4,2,2325.618750  
4,2,2679.837838  
4,2,2515.175000  
4,2,4698.036765

4,2,3641.105128  
4,2,5446.300000  
4,2,2447.926471  
4,2,2412.380952  
4,2,1640.426829  
4,2,3095.312500  
4,2,2014.960000  
4,2,4941.529412  
4,2,2497.187500  
4,2,4586.411184  
4,2,2994.803347  
4,2,3260.208333  
4,2,1650.685897  
4,2,2727.000000  
4,2,2443.142857  
4,2,3836.883721  
4,2,4302.500000  
4,2,2308.244681  
4,2,3514.968085  
4,2,1927.285714  
4,2,6135.096154  
4,2,6077.454545  
4,2,5217.012255  
4,2,2062.512195  
4,2,3954.211538  
4,2,1799.951220  
4,2,4939.968750  
4,2,2243.327778  
4,2,1712.553191  
4,2,6140.722826  
4,2,1986.647577  
4,2,2198.475000  
4,2,2564.000000  
4,2,1616.527027  
4,2,4282.791667  
4,2,4553.771429  
4,2,3152.687500  
4,2,5625.586806  
4,2,2467.142857  
4,2,2223.564103  
4,2,2266.888889  
4,2,2345.284375  
4,2,6376.388514  
4,2,3361.500000  
4,2,1941.833333  
4,2,1726.375000  
4,2,1914.088235  
4,2,21116.162879  
4,2,2270.490196  
4,2,3625.384615  
4,2,1811.027027  
4,2,1534.347222  
4,2,3833.292614  
4,2,2333.538462  
4,2,2094.782895  
4,2,2890.846591  
4,2,3959.635417  
4,2,4974.187500  
4,2,5699.698171  
4,2,1619.115854  
4,2,2857.701923  
4,2,2412.084239  
4,2,1798.205128  
4,2,7564.446429  
4,2,6925.582627  
4,2,2700.558659

4,2,1785.578125  
4,2,4924.762255  
4,2,6267.900000  
4,2,3500.942308  
4,2,2925.949324  
4,2,6466.644737  
4,2,4669.604651  
4,2,5115.437500  
4,2,2014.868852  
4,2,5610.743316  
4,2,2800.951220  
4,2,2693.494681  
4,2,7293.442308  
4,2,2308.050000  
4,2,1606.935484  
4,2,1598.702128  
4,2,5671.762500  
4,2,1767.083799  
4,2,3795.788043  
4,2,2064.372340  
4,2,2645.163265  
4,2,5722.276382  
4,2,16372.346939  
4,2,5083.709135  
4,2,3994.743590  
4,2,2288.304878  
4,2,2516.938889  
4,2,4269.207547  
4,2,9531.870629  
4,2,1960.459375  
4,2,3077.938889  
4,2,2560.619186  
4,2,9598.377604  
4,2,5529.803571  
4,2,1550.366279  
4,2,3002.282895  
4,2,3495.720000  
4,2,3967.574468  
4,2,10126.491379  
4,2,8283.843373  
4,2,1568.846154  
4,2,5552.531646  
4,2,4045.839286  
4,2,2099.500000  
4,2,1959.896739  
4,2,1893.545455  
4,2,4543.961538  
4,2,3094.666667  
4,2,2272.384868  
4,2,2890.705729  
4,2,1509.119565  
4,2,1941.500000  
4,2,2749.127660  
4,2,1680.625000  
4,2,2606.365132  
4,2,1936.113971  
4,2,1822.579909  
4,2,1678.771300  
4,2,1743.346154  
4,2,2630.625000  
4,2,6772.255814  
4,2,2005.773810  
4,2,2100.109756  
4,2,1928.926829  
4,2,4834.438462  
4,2,2176.996622

4,2,1684.371429  
4,2,2417.235294  
4,2,3619.741071  
4,2,2812.130000  
4,2,1625.021739  
4,2,11022.393617  
4,2,4747.086957  
4,2,3303.358696  
4,2,8494.242188  
4,2,4971.083333  
4,2,4067.900000  
4,2,2167.147222  
4,2,3778.000000  
4,2,1809.750000  
4,2,2065.107143  
4,2,7978.877551  
4,2,1535.900568  
4,2,26901.555556  
4,2,4764.345109  
4,2,1949.818182  
4,2,7617.875000  
4,2,2522.927907  
4,2,2530.438776  
4,2,3392.327731  
4,2,3204.421053  
4,2,2734.102649  
4,2,2422.034884  
4,2,2196.996875  
4,2,2524.758621  
4,2,1845.595395  
4,2,5867.689024  
4,2,4760.902439  
4,2,3552.015385  
4,2,6118.000000  
4,2,4442.502841  
4,2,1606.404412  
4,2,6923.022727  
4,2,2793.367347  
4,2,2079.457447  
4,2,3959.071429  
4,2,2429.681818  
4,2,5262.594340  
4,2,2036.882212  
4,2,9648.271930  
4,2,1928.744395  
4,2,2296.809783  
4,2,9264.000000  
4,2,2976.519231  
4,2,2384.771739  
4,2,12963.000000  
4,2,2659.843750  
4,2,3103.753125  
4,2,3858.065789  
4,2,1517.238636  
4,2,2258.250000  
4,2,25152.383721  
4,2,3983.664062  
4,2,2273.227273  
4,2,1759.666667  
4,2,1617.825000  
4,2,1715.836310  
4,2,2139.635220  
4,2,5623.031429  
4,2,6816.955556  
4,2,4406.612245  
4,2,3864.154930

4,2,2780.756098  
4,2,2461.157895  
4,2,6414.075000  
4,2,2912.625000  
4,2,3201.562500  
4,2,1917.928571  
4,2,1760.742347  
4,2,2054.379310  
4,2,1966.965116  
4,2,1970.219895  
4,2,1715.874251  
4,2,4289.848168  
4,2,5122.677500  
4,2,2023.299528  
4,2,2663.453488  
4,2,1609.793605  
4,2,3375.500000  
4,2,2247.305556  
4,2,7626.253049  
4,2,4233.334677  
4,2,2428.230769  
4,2,1870.231250  
4,2,3171.856707  
4,2,3678.406250  
4,2,2168.581395  
4,2,12110.422222  
4,2,3080.553571  
4,2,3063.590909  
4,2,1644.193750  
4,2,2950.075521  
4,2,3826.243243  
4,2,6279.955414  
4,2,8806.698565  
4,2,5412.440476  
4,2,2774.161585  
4,2,1737.298780  
4,2,3434.047619  
4,2,2759.445312  
4,2,2977.649306  
4,2,2385.171875  
4,2,4339.476974  
4,2,1575.610465  
4,2,4934.412037  
4,2,8130.425595  
4,2,6722.696078  
4,2,4882.691489  
4,2,2150.823370  
4,2,2895.719907  
4,2,5810.818750  
4,2,5456.461538  
4,2,1679.052778  
4,2,1774.384615  
4,2,2270.375000  
4,2,1777.266667  
4,2,3691.097561  
4,2,4681.997222  
4,2,8509.448529  
4,2,2961.000000  
4,2,7938.144886  
4,2,2064.229167  
4,2,1654.253788  
4,2,2068.524038  
4,2,1689.838710  
4,2,1785.683333  
4,2,4126.193548  
4,2,3527.669951

4,2,1634.375000  
4,2,3256.285714  
4,2,2989.551282  
4,2,3329.269886  
4,2,4943.283854  
4,2,4262.361486  
4,2,3177.258929  
4,2,4467.755459  
4,2,2515.847826  
4,2,8990.285714  
4,2,1587.500000  
4,2,3611.000000  
4,2,7808.821078  
4,2,2202.863372  
4,2,1653.053977  
4,2,2295.544776  
4,2,1905.974359  
4,2,32261.983173  
4,2,3123.208333  
4,2,1981.300000  
4,2,3856.976744  
4,2,1547.000000  
4,2,2207.226471  
4,2,3577.539062  
4,2,1658.019531  
4,2,4761.479545  
4,2,9359.333333  
4,2,3781.112805  
4,2,2966.700658  
4,2,3510.534091  
4,2,2827.034091  
4,2,5185.142857  
4,2,5355.140244  
4,2,2087.364286  
4,2,5205.868421  
4,2,1697.860465  
4,2,4925.785714  
4,2,10930.890625  
4,2,3800.795918  
4,2,4915.574468  
4,2,9367.319444  
4,2,1832.260000  
4,2,16543.023013  
4,2,1959.093750  
4,2,2323.532609  
4,2,3061.361702  
4,2,7098.753125  
4,2,2087.921875  
4,2,2522.510417  
4,2,2179.568750  
4,2,2977.588235  
4,2,4486.871429  
4,2,2950.514423  
4,2,2806.701087  
4,2,10148.016949  
4,2,4649.655738  
4,2,2162.677143  
4,2,3881.956522  
4,2,2576.679245  
4,2,1653.333333  
4,2,4571.969388  
4,2,2847.411765  
4,2,2052.729560  
4,2,1751.000000  
4,2,9139.116848  
4,2,8862.823718

4,2,2286.906250  
4,2,1658.708333  
4,2,2738.948718  
4,2,2236.777027  
4,2,1692.212766  
4,2,4792.788194  
4,2,6302.101852  
4,2,7493.478261  
4,2,5744.990625  
4,2,3024.250000  
4,2,4774.654891  
4,2,2847.884615  
4,2,1562.225806  
4,2,3301.056818  
4,2,1737.494444  
4,2,3060.447368  
4,2,6340.329268  
4,2,3735.416667  
4,2,3117.140625  
4,2,1746.165000  
4,2,3286.531250  
4,2,3247.387500  
4,2,2340.108974  
4,2,1571.028571  
4,2,3606.869565  
4,2,4119.396040  
4,2,8701.441176  
4,2,2524.141509  
4,2,2904.793478  
4,2,9877.598837  
4,2,6254.367788  
4,2,1759.833333  
4,2,1678.415625  
4,2,4333.695000  
4,2,2312.844595  
4,2,2001.925000  
4,2,7320.906383  
4,2,2626.625000  
4,2,1533.577586  
4,2,6669.103659  
4,2,3116.500000  
4,2,11093.590909  
4,2,5197.656977  
4,2,4499.968750  
4,2,6747.833333  
4,2,2207.279412  
4,2,2842.011364  
4,2,3756.327703  
4,2,2388.444444  
4,2,3150.276316  
4,2,2167.000000  
4,2,2285.616279  
4,2,3293.531250  
4,2,1763.361486  
4,2,3145.329787  
4,2,8314.953125  
4,2,1536.728659  
4,2,3966.423913  
4,2,1572.041667  
4,2,1951.653409  
4,2,2470.320000  
4,2,2485.232143  
4,2,1659.973684  
4,2,3138.371795  
4,2,2205.300000  
4,2,2057.617021

4,2,6346.329146  
4,2,3526.077778  
4,2,3001.021277  
4,2,2541.250000  
4,2,3011.717791  
4,2,2473.214286  
4,2,3431.223214  
4,2,2638.562500  
4,2,5526.400510  
4,2,6992.993056  
4,2,17666.447368  
4,2,3257.687500  
4,2,9644.517045  
4,2,5881.166667  
4,2,2833.686275  
4,2,2070.385638  
4,2,1667.208333  
4,2,1875.153846  
4,2,9739.804054  
4,2,2167.109551  
4,2,6228.943396  
4,2,3838.068878  
4,2,2981.791667  
4,2,2076.256757  
4,2,3761.359375  
4,2,2191.769231  
4,2,6856.750000  
4,2,3630.069767  
4,2,3073.102941  
4,2,3862.002551  
4,2,1952.769231  
4,2,2327.588542  
4,2,3939.306122  
4,2,4836.968750  
4,2,2014.565574  
4,2,4284.614130  
4,2,1870.069231  
4,2,2057.010417  
4,2,6294.777778  
4,2,2177.256944  
4,2,2582.070000  
4,2,3183.150000  
4,2,1709.209375  
4,2,1593.687500  
4,2,3985.782738  
4,2,1726.607143  
4,2,2771.524390  
4,2,10023.760870  
4,2,2545.335366  
4,2,3424.527778  
4,2,2354.642500  
4,2,2491.024390  
4,2,1788.837500  
4,2,4049.023256  
4,2,11609.954787  
4,2,2206.000000  
4,2,1560.525140  
4,2,1683.137725  
4,2,2463.405405  
4,2,2312.000000  
4,2,4529.529412  
4,2,2892.339623  
4,2,2225.225000  
4,2,2675.397727  
4,2,3616.500000  
4,2,3119.432692

4,2,2533.840909  
4,2,2212.535714  
4,2,5861.933333  
4,2,2596.343750  
4,2,1936.508721  
4,2,2181.176887  
4,2,3285.127778  
4,2,1666.330000  
4,2,9131.377907  
4,2,7103.735119  
4,2,2125.062500  
4,2,1842.488889  
4,2,7517.224359  
4,2,4874.606250  
4,2,2219.791667  
4,2,1855.309783  
4,2,1714.641026  
4,2,2554.502358  
4,2,2181.810096  
4,2,2192.870000  
4,2,5549.469388  
4,2,4745.571429  
4,2,5367.152632  
4,2,2668.120603  
4,2,4437.342105  
4,2,2142.768750  
4,2,1577.703488  
4,2,2539.225000  
4,2,1929.750000  
4,2,17274.936441  
4,2,5252.857143  
4,2,2813.272727  
4,2,2634.845455  
4,2,12492.778481  
4,2,3206.534759  
4,2,2282.459302  
4,2,2660.598684  
4,2,1728.100000  
4,2,2306.078947  
4,2,4621.125000  
4,2,12593.769231  
4,2,2050.952128  
4,2,9643.647959  
4,2,3815.665000  
4,2,3296.187500  
4,2,1695.437500  
4,2,2349.391304  
4,2,3672.967391  
4,2,1499.078125  
4,2,5451.824121  
4,2,3038.312500  
4,2,4065.882500  
4,2,2705.923404  
4,2,2471.634259  
4,2,1977.391720  
4,2,2107.520833  
4,2,2228.464286  
4,2,2115.708333  
4,2,8362.454545  
4,2,1816.540000  
4,2,2123.714286  
4,2,1742.634868  
4,2,2540.721591  
4,2,3033.755208  
4,2,5685.157143  
4,2,7448.298077

4,2,2853.720930  
4,2,2866.576220  
4,2,9997.000000  
4,2,4639.610063  
4,2,13526.500000  
4,2,4292.805556  
4,2,5612.583333  
4,2,3439.961538  
4,2,3047.687151  
4,2,2608.545455  
4,2,1681.324468  
4,2,4459.739362  
4,2,12726.826923  
4,2,3318.153005  
4,2,2031.461905  
4,2,2451.807692  
4,2,3912.166667  
4,2,2164.218137  
4,2,5064.543182  
4,2,2084.523256  
4,2,10890.687500  
4,2,1795.527027  
4,2,3760.109756  
4,2,1875.009615  
4,2,1765.905612  
4,2,1821.982955  
4,2,9557.011628  
4,2,1777.234375  
4,2,1564.813830  
4,2,2185.253125  
4,2,1652.179687  
4,2,3470.563830  
4,2,2063.186047  
4,2,2183.402778  
4,2,3166.425000  
4,2,3508.159091  
4,2,4108.157407  
4,2,4362.481481  
4,2,4145.906250  
4,2,6326.369565  
4,2,2678.902439  
4,2,1657.333333  
4,2,2019.216216  
4,2,1655.962500  
4,2,4245.971591  
4,2,1882.250000  
4,2,1776.401042  
4,2,1787.034946  
4,2,3192.000000  
4,2,5011.085714  
4,2,1900.745283  
4,2,1694.979730  
4,2,1676.615000  
4,2,1684.513514  
4,2,1998.466216  
4,2,2949.000000  
4,2,9085.181250  
4,2,1858.169643  
4,2,9024.707500  
4,2,3640.250000  
4,2,1586.812500  
4,2,4190.301471  
4,2,1900.894737  
4,2,9848.133721  
4,2,1989.305000  
4,2,4362.166667

4,2,3177.843750  
4,2,2929.787500  
4,2,3224.250000  
4,2,2824.218750  
4,2,6239.925532  
4,2,2312.763587  
4,2,2264.098684  
4,2,2154.295918  
4,2,2600.665441  
4,2,3105.826923  
4,2,1642.477778  
4,2,3053.250000  
4,2,6566.320000  
4,2,2426.463816  
4,2,3661.655405  
4,2,1841.333333  
4,2,3313.750000  
4,2,3402.220930  
4,2,5354.613095  
4,2,2538.134868  
4,2,3999.236111  
4,2,2265.368243  
4,2,4497.362559  
4,2,1630.495098  
4,2,2042.663462  
4,2,2068.095109  
4,2,3185.357558  
4,2,2665.518868  
4,2,1579.705128  
4,2,3229.923077  
4,2,5047.288945  
4,2,1598.065000  
4,2,2392.994318  
4,2,6844.523438  
4,2,2856.090580  
4,2,2142.569048  
4,2,4170.621875  
4,2,2320.390244  
4,2,2255.603261  
4,2,2844.288462  
4,2,3800.980978  
4,2,3380.239796  
4,2,3742.893293  
4,2,1860.422111  
4,2,2585.243316  
4,2,3273.459459  
4,2,1871.364286  
4,2,6644.116279  
4,2,1981.138365  
4,2,5998.690789  
4,2,4706.641026  
4,2,3428.829545  
4,2,5023.595000  
4,2,3223.669643  
4,2,3417.451754  
4,2,8014.320513  
4,2,6290.019231  
4,2,3089.051136  
4,2,1936.346591  
4,2,2039.720588  
4,2,2590.035714  
4,2,1699.804054  
4,2,2722.729167  
4,2,1787.767857  
4,2,2584.593750  
4,2,1537.457386

4,2,3442.764423  
4,2,2178.290000  
4,2,5459.988095  
4,2,1781.196970  
4,2,1910.194444  
4,2,2693.790698  
4,2,8868.372549  
4,2,5770.590909  
4,2,10861.745098  
4,2,2594.490196  
4,2,1790.160714  
4,2,3574.187500  
4,2,1599.472222  
4,2,19345.432990  
4,2,1813.393939  
4,2,1895.425000  
4,2,2587.494186  
4,2,1804.194444  
4,2,19069.300000  
4,2,5135.482143  
4,2,2629.263158  
4,2,1723.161290  
4,2,2179.653125  
4,2,6511.557927  
4,2,2212.434783  
4,2,4967.882353  
4,2,2640.596591  
4,2,4854.822917  
4,2,3570.450000  
4,2,29714.197115  
4,2,7793.489362  
4,2,1542.546512  
4,2,4009.054687  
4,2,4066.727273  
4,2,2682.428571  
4,2,5520.000000  
4,2,2481.247619  
4,2,1806.937500  
4,2,1540.243590  
4,2,4040.658163  
4,2,1561.250000  
4,2,2048.230769  
4,2,1951.011364  
4,2,3799.171053  
4,2,2324.238889  
4,2,2122.392670  
4,2,1551.900000  
4,2,2067.347826  
4,2,5851.972973  
4,2,16573.148241  
4,2,2731.520833  
4,2,1926.083333  
4,2,1844.555556  
4,2,1910.816327  
4,2,2444.109677  
4,2,2125.913907  
4,2,2891.245000  
4,2,4723.853659  
4,2,6828.609091  
4,2,2355.000000  
4,2,14566.439024  
4,2,1719.473684  
4,2,2028.200000  
4,2,7656.670082  
4,2,1995.428571  
4,2,5416.175000

4,2,3718.118902  
4,2,1751.435897  
4,2,2447.959799  
4,2,4754.061728  
4,2,1657.924837  
4,2,15592.076923  
4,2,4018.258929  
4,2,9231.372340  
4,2,10443.850000  
4,2,1574.600000  
4,2,1555.851955  
4,2,2319.366667  
4,2,2471.750000  
4,2,4344.462500  
4,2,3330.000000  
4,2,2663.203608  
4,2,5304.221154  
4,2,2267.250000  
4,2,2702.699405  
4,2,1565.153846  
4,2,5484.593373  
4,2,4866.694737  
4,2,2148.650000  
4,2,2685.637143  
4,2,3016.056604  
4,2,1775.545455  
4,2,1919.303571  
4,2,5207.390000  
4,2,3225.393617  
4,2,2206.892857  
4,2,1532.960526  
4,2,3922.986842  
4,2,2445.740385  
4,2,2694.104167  
4,2,1985.993243  
4,2,8563.062500  
4,2,1663.625000  
4,2,3146.628289  
4,2,4800.857500  
4,2,3792.372222  
4,2,6195.863095  
4,2,6390.198864  
4,2,1803.591837  
4,2,2219.555556  
4,2,2362.346154  
4,2,7879.142857  
4,2,2184.019022  
4,2,33763.702899  
4,2,1927.125000  
4,2,4354.514151  
4,2,5478.667969  
4,2,2360.956897  
4,2,2143.671875  
4,2,5871.170000  
4,2,6648.786765  
4,2,6307.830357  
4,2,2651.000000  
4,2,1791.031250  
4,2,4575.394886  
4,2,4564.884615  
4,2,2921.676136  
4,2,4783.093458  
4,2,2275.908784  
4,2,1621.244318  
4,2,2572.500000  
4,2,50719.700000

4,2,9537.625000  
4,2,1612.743902  
4,2,1631.070652  
4,2,2092.755952  
4,2,2415.937500  
4,2,1761.387821  
4,2,2123.138158  
4,2,54056.062500  
4,2,5936.625000  
4,2,2844.592262  
4,2,1651.140625  
4,2,4931.695513  
4,2,1968.500000  
4,2,1829.800676  
4,2,2817.288690  
4,2,2774.496711  
4,2,1517.444444  
4,2,2643.017857  
4,2,1501.552632  
4,2,3363.833333  
4,2,17695.696970  
4,2,2176.312500  
4,2,5763.729167  
4,2,1921.921875  
4,2,1646.310811  
4,2,3847.798077  
4,2,3245.116279  
4,2,2941.160714  
4,2,1698.758523  
4,2,6686.691176  
4,2,2222.363889  
4,2,1893.524390  
4,2,20943.313776  
4,2,3995.581897  
4,2,1931.815789  
4,2,2234.689024  
4,2,13752.974359  
4,2,2192.609756  
4,2,3817.820513  
4,2,4083.875000  
4,2,7114.840000  
4,2,4180.372642  
4,2,3352.534884  
4,2,9119.086538  
4,2,2174.737903  
4,2,2583.000000  
4,2,1572.312500  
4,2,6349.534091  
4,2,4653.500000  
4,2,1957.297872  
4,2,7253.615000  
4,2,4814.127358  
4,2,1976.358974  
4,2,2963.175676  
4,2,3289.295455  
4,2,3281.460000  
4,2,1542.083333  
4,2,3485.716216  
4,2,1851.692073  
4,2,2627.018293  
4,2,2467.347561  
4,2,1661.270833  
4,2,4748.744898  
4,2,5970.581395  
4,2,7809.808140  
4,2,3525.323353

4,2,5957.479167  
4,2,4265.306122  
4,2,3480.872222  
4,2,3049.820175  
4,2,3358.305556  
4,2,1557.777778  
4,2,1704.205882  
4,2,2365.053922  
4,2,2000.027778  
4,2,5246.515000  
4,2,4973.362500  
4,2,2264.109756  
4,2,1838.875000  
4,2,5296.910714  
4,2,1707.926471  
4,2,2759.641104  
4,2,6232.923913  
4,2,3962.191489  
4,2,1713.000000  
4,2,3104.916667  
4,2,2185.100543  
4,2,3332.400000  
4,2,1616.265363  
4,2,1559.522059  
4,2,5004.434375  
4,2,2667.250000  
4,2,1920.422297  
4,2,2129.142105  
4,2,2672.729167  
4,2,4762.402439  
4,2,4005.293478  
4,2,1983.889706  
4,2,4598.054054  
4,2,1833.014045  
4,2,2140.012821  
4,2,3186.486702  
4,2,98087.655405  
4,2,1867.510135  
4,2,10236.319149  
4,2,7743.350000  
4,2,4855.413043  
4,2,1616.721429  
4,2,1611.423913  
4,2,4353.166667  
4,2,6603.068750  
4,2,1908.930000  
4,2,4188.671429  
4,2,3026.602564  
4,2,2755.035714  
4,2,1611.162500  
4,2,3066.391509  
4,2,1591.804878  
4,2,4141.617647  
4,2,3131.920455  
4,2,3259.477273  
4,2,3267.703125  
4,2,2799.555921  
4,2,4546.408163  
4,2,5446.612805  
4,2,7821.817073  
4,2,2704.333333  
4,2,4590.582386  
4,2,1769.230769  
4,2,4200.575000  
4,2,4272.320513  
4,2,2621.698113

4,2,5788.489583  
4,2,3824.597826  
4,2,1808.666667  
4,2,1605.454082  
4,2,1732.697368  
4,2,3413.875000  
4,2,4197.154028  
4,2,2666.647727  
4,2,2800.104167  
4,2,2710.453488  
4,2,1589.189189  
4,2,2264.003472  
4,2,4031.479592  
4,2,1511.281250  
4,2,2909.915698  
4,2,2866.170213  
4,2,1668.548851  
4,2,4949.617647  
4,2,3569.107143  
4,2,1717.650000  
4,2,1768.122340  
4,2,3868.199519  
4,2,1689.125000  
4,2,6742.333333  
4,2,3880.341667  
4,2,2479.520833  
4,2,1793.088889  
4,2,7683.067568  
4,2,5547.300481  
4,2,4131.752778  
4,2,3601.906250  
4,2,1753.000000  
4,2,5865.734694  
4,2,2676.448113  
4,2,2623.804487  
4,2,5347.308962  
4,2,2952.912162  
4,2,2960.636719  
4,2,5484.767016  
4,2,3223.562500  
4,2,1795.562500  
4,2,2816.834437  
4,2,4412.918750  
4,2,2153.223837  
4,2,1780.375000  
4,2,11440.936170  
4,2,1565.375000  
4,2,2590.342857  
4,2,2741.328125  
4,2,1946.347826  
4,2,1562.215278  
4,2,8124.250000  
4,2,3736.070000  
4,2,5856.951705  
4,2,6468.916667  
4,2,5000.329545  
4,2,3255.697917  
4,2,2798.193989  
4,2,3368.153846  
4,2,3294.031250  
4,2,2701.730392  
4,2,2970.284091  
4,2,2228.595588  
4,2,5743.853659  
4,2,4444.186047  
4,2,1631.692308

4,2,2731.679687  
4,2,1863.484375  
4,2,4426.763393  
4,2,2014.785714  
4,2,2087.057065  
4,2,1823.951220  
4,2,4931.178977  
4,2,2638.105263  
4,2,2620.850000  
4,2,2318.953488  
4,2,1623.773256  
4,2,2370.794444  
4,2,12745.917683  
4,2,3596.982143  
4,2,8060.493590  
4,2,1691.443627  
4,2,2711.562500  
4,2,2434.575581  
4,2,3001.875000  
4,2,4108.360849  
4,2,13150.121429  
4,2,3830.166667  
4,2,1769.514286  
4,2,2947.585366  
4,2,2359.192308  
4,2,3211.553571  
4,2,3001.968023  
4,2,2578.000000  
4,2,2460.684211  
4,2,4871.154255  
4,2,2272.914352  
4,2,2477.342857  
4,2,2617.857143  
4,2,2334.410494  
4,2,6944.744898  
4,2,3233.000000  
4,2,2950.664063  
4,2,5061.800595  
4,2,2181.324324  
4,2,1553.700000  
4,2,1875.687500  
4,2,1620.494898  
4,2,1697.197674  
4,2,2358.983333  
4,2,4411.382353  
4,2,1557.250000  
4,2,3048.109375  
4,2,1539.073864  
4,2,3094.125000  
4,2,1903.497222  
4,2,2427.073034  
4,2,13108.888889  
4,2,3286.341463  
4,2,2635.846154  
4,2,13087.200000  
4,2,2912.846154  
4,2,3686.800000  
4,2,2703.647436  
4,2,3862.717262  
4,2,2720.677083  
4,2,2480.935484  
4,2,4972.282500  
4,2,4038.886574  
4,2,5947.994318  
4,2,1963.119048  
4,2,1712.800000

4,2,1740.036184  
4,2,2812.259459  
4,2,29579.416667  
4,2,3390.488095  
4,2,4175.666667  
4,2,2228.198830  
4,2,7189.131737  
4,2,1869.837662  
4,2,3878.827778  
4,2,9246.161765  
4,2,1578.923077  
4,2,2852.182927  
4,2,5957.622596  
4,2,5666.945122  
4,2,6327.298077  
4,2,2210.735294  
4,2,2520.067568  
4,2,4704.762500  
4,2,4008.785714  
4,2,2407.625000  
4,2,1820.825521  
4,2,3330.775000  
4,2,2946.204082  
4,2,6784.214286  
4,2,5061.916667  
4,2,4214.812500  
4,2,3930.883929  
4,2,2060.612500  
4,2,3950.883721  
4,2,3618.995283  
4,2,2045.541667  
4,2,4315.576705  
4,2,1596.692568  
4,2,3679.125000  
4,2,1623.705882  
4,2,1516.853659  
4,2,2901.600000  
4,2,2295.660377  
4,2,1522.488636  
4,2,1569.425150  
4,2,1585.400000  
4,2,7580.730337  
4,2,4367.714286  
4,2,3039.725000  
4,2,1722.936170  
4,2,1741.625000  
4,2,5998.173077  
4,2,1747.798077  
4,2,3811.571429  
4,2,2408.542453  
4,2,1971.018229  
4,2,4024.027027  
4,2,3529.411765  
4,2,4554.924528  
4,2,3543.393082  
4,2,1701.705128  
4,2,3913.120000  
4,2,2390.185976  
4,2,1938.291667  
4,2,3367.838415  
4,2,1705.302885  
4,2,3460.627500  
4,2,4029.187500  
4,2,1751.800000  
4,2,1606.839286  
4,2,1855.016304

4,2,4012.472973  
4,2,2741.000000  
4,2,4236.543367  
4,2,1553.957237  
4,2,3230.804348  
4,2,3308.162162  
4,2,1699.296053  
4,2,3650.367347  
4,2,1804.566176  
4,2,2848.928571  
4,2,6758.768085  
4,2,2035.581395  
4,2,1620.505952  
4,2,1526.000000  
4,2,2494.043478  
4,2,2241.894022  
4,2,2569.563953  
4,2,2060.722973  
4,2,3200.900735  
4,2,5651.208333  
4,2,2449.523810  
4,2,5300.148148  
4,2,8893.194444  
4,2,10224.537698  
4,2,1715.848214  
4,2,2295.639205  
4,2,1879.113095  
4,2,1784.701923  
4,2,1843.061224  
4,2,3049.052500  
4,2,7283.777778  
4,2,1782.070122  
4,2,2695.878788  
4,2,4917.428241  
4,2,2068.542683  
4,2,3297.334302  
4,2,2900.700000  
4,2,3360.515625  
4,2,2745.042683  
4,2,2157.101744  
4,2,2164.060000  
4,2,2480.710526  
4,2,4742.791667  
4,2,11298.159091  
4,2,4496.701220  
4,2,1980.695946  
4,2,2688.245370  
4,2,2208.233333  
4,2,8187.393617  
4,2,1844.993421  
4,2,3541.775943  
4,2,1504.853659  
4,2,2783.132500  
4,2,1954.159091  
4,2,2051.820513  
4,2,3661.812500  
4,2,5014.076923  
4,2,1537.570122  
4,2,10886.170213  
4,2,3299.602941  
4,2,6479.949074  
4,2,3110.555556  
4,2,5149.596939  
4,2,1903.346154  
4,2,1994.343750  
4,2,2746.497449

4,2,2157.800000  
4,2,3168.185897  
4,2,1851.536585  
4,2,3495.487179  
4,2,4677.112500  
4,2,11750.539216  
4,2,7059.581897  
4,2,4978.282051  
4,2,1677.607143  
4,2,2202.811111  
4,2,2508.383523  
4,2,1846.416667  
4,2,2545.990196  
4,2,2381.357143  
4,2,4138.375000  
4,2,13008.160256  
4,2,2069.200980  
4,2,2487.514286  
4,2,4774.280405  
4,2,2547.920213  
4,2,2472.864583  
4,2,3457.853723  
4,2,5652.940217  
4,2,4310.673077  
4,2,2903.980392  
4,2,1954.849057  
4,2,3784.250000  
4,2,8136.937500  
4,2,2105.791667  
4,2,2715.620000  
4,2,3023.655172  
4,2,9298.300000  
4,2,2800.352941  
4,2,4793.909091  
4,2,2120.664634  
4,2,2346.179687  
4,2,2015.171296  
4,2,2664.094595  
4,2,3117.594737  
4,2,2196.333333  
4,2,2417.625000  
4,2,5786.975379  
4,2,2488.467105  
4,2,3367.166667  
4,2,2059.338235  
4,2,2275.315000  
4,2,2308.502273  
4,2,1687.700000  
4,2,6020.683962  
4,2,13853.137500  
4,2,3052.343750  
4,2,1771.982143  
4,2,2170.046429  
4,2,5028.921569  
4,2,3336.941176  
4,2,2867.015625  
4,2,3149.213636  
4,2,8387.892045  
4,2,4691.353261  
4,2,3605.517241  
4,2,2177.875000  
4,2,2218.511364  
4,2,2070.761364  
4,2,3074.041667  
4,2,5522.548387  
4,2,1542.304348

4,2,4701.187500  
4,2,4143.393617  
4,2,2494.138514  
4,2,4154.589286  
4,2,2265.857639  
4,2,2202.609043  
4,2,1771.185000  
4,2,2998.666667  
4,2,5197.449074  
4,2,3173.189474  
4,2,2096.500000  
4,2,2229.025000  
4,2,3071.404255  
4,2,2223.674312  
4,2,3117.404762  
4,2,1559.357143  
4,2,8092.883721  
4,2,4478.513889  
4,2,2885.122222  
4,2,2558.096591  
4,2,2409.237245  
4,2,2712.294118  
4,2,4896.153846  
4,2,3423.476510  
4,2,5368.088235  
4,2,5280.387755  
4,2,1972.328125  
4,2,2054.296482  
4,2,3416.812500  
4,2,2864.233974  
4,2,3200.940789  
4,2,2719.845238  
4,2,6276.011364  
4,2,3045.984043  
4,2,5266.341463  
4,2,1731.978261  
4,2,2268.008523  
4,2,5142.854167  
4,2,7025.000000  
4,2,2819.510135  
4,2,1610.096429  
4,2,2517.166667  
4,2,4596.861111  
4,2,1948.511628  
4,2,1550.067073  
4,2,1742.643750  
4,2,2663.213415  
4,2,3216.522059  
4,2,2294.200000  
4,2,8110.546875  
4,2,2823.181818  
4,2,1867.166667  
4,2,2506.534091  
4,2,2137.438776  
4,2,2678.138889  
4,2,2367.354369  
4,2,1886.158824  
4,2,1596.050000  
4,2,2656.719595  
4,2,2492.085648  
4,2,3576.425000  
4,2,6311.851351  
4,2,3552.671429  
4,2,8245.734375  
4,2,2835.510417  
4,2,2351.545455

4,2,3479.837054  
4,2,3990.291429  
4,2,1986.559659  
4,2,5177.671429  
4,2,2810.170918  
4,2,1529.785714  
4,2,1701.552083  
4,2,2193.750000  
4,2,1685.905941  
4,2,4267.524390  
4,2,2023.154605  
4,2,1748.919118  
4,2,31533.525424  
4,2,4945.023256  
4,2,5057.375000  
4,2,1532.824468  
4,2,1978.418605  
4,2,1710.750000  
4,2,5110.277027  
4,2,1738.633333  
4,2,3912.372093  
4,2,2264.040761  
4,2,2240.295732  
4,2,2733.189189  
4,2,2331.500000  
4,2,3216.535714  
4,2,6011.875000  
4,2,5822.231061  
4,2,5032.997159  
4,2,2938.925926  
4,2,3305.097561  
4,2,2126.697368  
4,2,3642.088889  
4,2,2107.705556  
4,2,3887.880000  
4,2,2537.870968  
4,2,1732.750000  
4,2,1894.637500  
4,2,6476.184211  
4,2,5776.736842  
4,2,3254.307692  
4,2,2534.153846  
4,2,1712.101351  
4,2,2991.400000  
4,2,1706.301887  
4,2,2793.269022  
4,2,1513.472561  
4,2,1874.342857  
4,2,1526.538462  
4,2,3223.764706  
4,2,2560.662791  
4,2,2099.173913  
4,2,4132.765714  
4,2,4813.006452  
4,2,2625.022059  
4,2,2334.442308  
4,2,2600.548295  
4,2,2604.916667  
4,2,2690.312500  
4,2,2329.165698  
4,2,4913.125000  
4,2,7384.990000  
4,2,2780.833333  
4,2,16310.312500  
4,2,3498.863839  
4,2,6411.537037

4,2,1559.818182  
4,2,1623.279070  
4,2,4425.166667  
4,2,5544.409375  
4,2,1553.000000  
4,2,3649.969512  
4,2,9438.070000  
4,2,3700.065789  
4,2,5509.440341  
4,2,2103.502119  
4,2,2015.168919  
4,2,3178.393750  
4,2,1630.437500  
4,2,2908.277439  
4,2,3465.812500  
4,2,1873.506410  
4,2,3129.738636  
4,2,4405.166667  
4,2,2338.924419  
4,2,6971.382682  
4,2,4309.911765  
4,2,3291.254545  
4,2,3429.729730  
4,2,2316.250000  
4,2,1843.818182  
4,2,4562.912500  
4,2,1614.770270  
4,2,4961.155556  
4,2,1577.681122  
4,2,1580.459302  
4,2,3202.842500  
4,2,1816.340278  
4,2,6306.057065  
4,2,2693.801471  
4,2,2560.805556  
4,2,3115.300000  
4,2,1638.625000  
4,2,2639.702381  
4,2,2060.022222  
4,2,2201.918269  
4,2,4589.883333  
4,2,3305.969231  
4,2,3221.568750  
4,2,16740.698529  
4,2,2390.260870  
4,2,8775.596354  
4,2,2455.478261  
4,2,1740.810976  
4,2,11500.363636  
4,2,2205.073529  
4,2,4233.668367  
4,2,3457.409091  
4,2,2954.739130  
4,2,1760.795732  
4,2,3991.043367  
4,2,4662.781250  
4,2,1624.093023  
4,2,2315.000000  
4,2,1587.443396  
4,2,8336.665957  
4,2,7461.218750  
4,2,3062.403941  
4,2,1933.517986  
4,2,11123.720588  
4,2,2201.262069  
4,2,3154.685083

4,2,2283.564865  
4,2,2536.937500  
4,2,1929.385870  
4,2,3186.426471  
4,2,1772.355978  
4,2,2371.565657  
4,2,2520.458101  
4,2,4736.613636  
4,2,1535.161184  
4,2,3474.489362  
4,2,4746.237705  
4,2,2898.958763  
4,2,13636.522727  
4,2,1991.336538  
4,2,1842.669951  
4,2,2938.000000  
4,2,1988.021739  
4,2,11652.002874  
4,2,3778.536585  
4,2,1526.060417  
4,2,3397.916667  
4,2,1730.331081  
4,2,1789.079268  
4,2,5735.391892  
4,2,2564.478261  
4,2,6265.200000  
4,2,8876.437500  
4,2,2007.642045  
4,2,2693.727273  
4,2,4966.255000  
4,2,2824.315000  
4,2,2803.316327  
4,2,8829.007812  
4,2,2503.932692  
4,2,1734.925000  
4,2,3662.408163  
4,2,4260.768293  
4,2,3037.122340  
4,2,3550.571429  
4,2,1707.202381  
4,2,5597.897436  
4,2,4560.305000  
4,2,5322.962264  
4,2,2078.268293  
4,2,1577.326087  
4,2,2169.147059  
4,2,2943.051471  
4,2,3592.562500  
4,2,1895.190789  
4,2,4942.716667  
4,2,1544.951220  
4,2,3453.535714  
4,2,1823.615385  
4,2,3023.584906  
4,2,5409.969512  
4,2,1730.000000  
4,2,2330.067073  
4,2,3562.424623  
4,2,1666.232258  
4,2,1979.782857  
4,2,4672.865854  
4,2,7383.542601  
4,2,6408.417857  
4,2,3036.945946  
4,2,5822.053571  
4,2,2927.219388

4,2,3160.382653  
4,2,1503.625000  
4,2,4717.457447  
4,2,3040.241477  
4,2,3326.238636  
4,2,4311.748571  
4,2,3294.415698  
4,2,1762.740933  
4,2,2037.858553  
4,2,8540.453947  
4,2,2110.881250  
4,2,3234.559172  
4,2,3024.956395  
4,2,2573.351064  
4,2,2590.000000  
4,2,3482.958333  
4,2,2627.828125  
4,2,1543.633721  
4,2,1689.616071  
4,2,3838.717949  
4,2,2100.496711  
4,2,4327.059783  
4,2,1797.568182  
4,2,2005.588235  
4,2,2471.604294  
4,2,4645.965426  
4,2,2420.933333  
4,2,6601.170455  
4,2,2045.904762  
4,2,3082.345000  
4,2,3123.479730  
4,2,4564.375000  
4,2,3860.020349  
4,2,3583.722973  
4,2,1994.442500  
4,2,1511.959184  
4,2,1621.242500  
4,2,2943.981707  
4,2,3344.198113  
4,2,1678.500000  
4,2,3474.714286  
4,2,17846.902344  
4,2,10077.837004  
4,2,1723.538674  
4,2,3331.879747  
4,2,1785.736413  
4,2,2068.941860  
4,2,7607.339623  
4,2,3262.819079  
4,2,15385.745614  
4,2,2491.485795  
4,2,3332.320000  
4,2,1555.699324  
4,2,2027.767442  
4,2,10911.831395  
4,2,1681.485119  
4,2,2869.257653  
4,2,2720.468085  
4,2,6019.945946  
4,2,1790.250000  
4,2,9161.296296  
4,2,4328.170455  
4,2,1521.683333  
4,2,4771.851562  
4,2,2475.516304  
4,2,2426.230114

4,2,6646.546875  
4,2,1962.529070  
4,2,3881.743590  
4,2,2459.454545  
4,2,9829.837264  
4,2,2364.978261  
4,2,2533.815789  
4,2,1622.179856  
4,2,3003.005682  
4,2,18698.650000  
4,2,2173.659574  
4,2,12761.903226  
4,2,5547.538462  
4,2,12893.465909  
4,2,1618.138158  
4,2,1948.740132  
4,2,1723.907787  
4,2,3131.000000  
4,2,5691.195000  
4,2,2353.217391  
4,2,1654.833333  
4,2,2427.786111  
4,2,3151.904255  
4,2,2519.844512  
4,2,3014.709459  
4,2,2581.500000  
4,2,3961.375000  
4,2,4610.481383  
4,2,8294.954082  
4,2,3595.194079  
4,2,2936.900000  
4,2,1538.099432  
4,2,15034.895833  
4,2,3916.944444  
4,2,2277.476064  
4,2,2140.662162  
4,2,1661.087432  
4,2,4806.881818  
4,2,1875.347826  
4,2,1731.094512  
4,2,5307.104167  
4,2,3474.677885  
4,2,1833.442708  
4,2,5145.227273  
4,2,4303.396277  
4,2,2481.926136  
4,2,2796.350000  
4,2,2994.285714  
4,2,3331.776316  
4,2,3793.078488  
4,2,2598.755435  
4,2,1514.375000  
4,2,2002.488372  
4,2,1582.025000  
4,2,3519.000000  
4,2,2595.428571  
4,2,2685.292453  
4,2,5402.758523  
4,2,3561.881098  
4,2,2226.647059  
4,2,3277.788889  
4,2,1780.818182  
4,2,2039.844595  
4,2,2542.572864  
4,2,4940.125000  
4,2,7845.298077

4,2,3414.926136  
4,2,4958.683333  
4,2,2500.000000  
4,2,5126.717489  
4,2,5872.317073  
4,2,3749.520000  
4,2,3218.579787  
4,2,4267.639535  
4,2,3179.125000  
4,2,1874.385714  
4,2,2785.802500  
4,2,6413.072917  
4,2,1987.106771  
4,2,3828.000000  
4,2,4796.946809  
4,2,5470.090909  
4,2,1889.152439  
4,2,1939.238636  
4,2,1843.766447  
4,2,2001.989583  
4,2,1790.055556  
4,2,2697.790761  
4,2,6154.482500  
4,2,1769.738636  
4,2,1736.493902  
4,2,2388.450000  
4,2,2735.644231  
4,2,2123.421053  
4,2,9475.106250  
4,2,1775.785714  
4,2,11439.531250  
4,2,20597.781250  
4,2,1772.583333  
4,2,10075.585000  
4,2,2917.718750  
4,2,2769.418919  
4,2,1521.585366  
4,2,1968.035714  
4,2,2164.765000  
4,2,7156.146341  
4,2,14298.901786  
4,2,2641.181818  
4,2,1844.773810  
4,2,1764.425714  
4,2,3245.125000  
4,2,1937.333333  
4,2,1712.368421  
4,2,39546.584416  
4,2,3970.674757  
4,2,2903.274390  
4,2,4901.984375  
4,2,1595.237179  
4,2,7811.788793  
4,2,3420.350000  
4,2,2736.323529  
4,2,3165.586957  
4,2,3732.331633  
4,2,3915.238220  
4,2,1922.468023  
4,2,14464.201923  
4,2,5850.039683  
4,2,1814.617021  
4,2,2825.218750  
4,2,2745.803922  
4,2,3751.583333  
4,2,2845.405405

4,2,4466.450000  
4,2,10038.332317  
4,2,2910.230366  
4,2,1679.160156  
4,2,2614.017949  
4,2,2134.176923  
4,2,8717.884615  
4,2,2646.347826  
4,2,2424.770833  
4,2,1939.031250  
4,2,4309.250000  
4,2,1559.027778  
4,2,1546.981707  
4,2,2003.381250  
4,2,1517.696809  
4,2,6835.640449  
4,2,2809.466667  
4,2,2341.039683  
4,2,5436.559322  
4,2,6366.875000  
4,2,3853.125000  
4,2,2397.000000  
4,2,3314.850000  
4,2,4865.000000  
4,2,3336.527778  
4,2,6772.240741  
4,2,2679.986842  
4,2,2174.255319  
4,2,2065.125000  
4,2,5270.244565  
4,2,1522.267974  
4,2,2966.836806  
4,2,3256.456376  
4,2,1911.760563  
4,2,3558.479167  
4,2,1856.459459  
4,2,5505.571429  
4,2,2772.061224  
4,2,7023.862179  
4,2,1542.780612  
4,2,3351.171875  
4,2,2783.307692  
4,2,1889.166667  
4,2,2171.500000  
4,2,3571.262500  
4,2,2410.491803  
4,2,7734.000000  
4,2,3762.271875  
4,2,3439.323671  
4,2,3128.693069  
4,2,1673.032468  
4,2,2983.945652  
4,2,1792.193182  
4,2,5450.419492  
4,2,14807.093750  
4,2,2340.700000  
4,2,4071.166667  
4,2,6004.675532  
4,2,2679.180556  
4,2,2179.533333  
4,2,2787.982143  
4,2,3644.813953  
4,2,2763.792411  
4,2,1892.750000  
4,2,2384.958333  
4,2,3159.586538

4,2,2017.987805  
4,2,4662.127907  
4,2,2882.188889  
4,2,1582.000000  
4,2,2802.125000  
4,2,2421.277439  
4,2,10399.278409  
4,2,6842.019231  
4,2,6642.541667  
4,2,14374.557692  
4,2,10749.452500  
4,2,2955.355769  
4,2,3414.804878  
4,2,3793.043750  
4,2,1802.680000  
4,2,2091.769231  
4,2,1708.181319  
4,2,10725.875000  
4,2,8891.500000  
4,2,2098.935000  
4,2,7147.702703  
4,2,1837.090909  
4,2,2511.083333  
4,2,2885.107955  
4,2,2014.768293  
4,2,2046.020349  
4,2,2082.842105  
4,2,2276.751337  
4,2,10057.444444  
4,2,5835.292929  
4,2,3064.904412  
4,2,1909.288690  
4,2,2165.936111  
4,2,6459.796875  
4,2,4757.497283  
4,2,2608.891667  
4,2,2556.250000  
4,2,1679.647727  
4,2,3002.183333  
4,2,1553.567010  
4,2,3350.414226  
4,2,4595.223837  
4,2,5123.612245  
4,2,5459.189904  
4,2,56984.861111  
4,2,10660.534884  
4,2,3329.767857  
4,2,2022.643293  
4,2,1948.125000  
4,2,3552.490741  
4,2,1610.600000  
4,2,1610.952381  
4,2,1826.700000  
4,2,7898.800926  
4,2,10363.066667  
4,2,2909.380000  
4,2,2034.903846  
4,2,6458.223558  
4,2,15556.446429  
4,2,2332.480114  
4,2,2628.571809  
4,2,145294.733696  
4,2,6197.938889  
4,2,3528.550676  
4,2,2151.720183  
4,2,4303.600000

4,2,5079.513298  
4,2,4678.942308  
4,2,6970.187500  
4,2,3119.349057  
4,2,3757.604592  
4,2,2011.500000  
4,2,3375.865625  
4,2,2176.235119  
4,2,3027.125000  
4,2,1995.817797  
4,2,8044.755208  
4,2,7194.138298  
4,2,1695.433824  
4,2,2243.037736  
4,2,5119.328125  
4,2,5915.783333  
4,2,6782.552632  
4,2,4229.398649  
4,2,1742.727273  
4,2,11447.304167  
4,2,5351.227941  
4,2,3371.319149  
4,2,1567.155405  
4,2,4412.261905  
4,2,2364.285714  
4,2,7423.335526  
4,2,4204.937500  
4,2,5885.718750  
4,2,4239.891892  
4,2,4215.985294  
4,2,7029.146341  
4,2,1676.720930  
4,2,3971.400000  
4,2,3351.451923  
4,2,6542.930851  
4,2,2857.069767  
4,2,5053.843750  
4,2,2760.840000  
4,2,1754.260638  
4,2,3193.853571  
4,2,2829.135000  
4,2,2341.750000  
4,2,3168.644231  
4,2,1723.210526  
4,2,2385.328125  
4,2,2035.881944  
4,2,11901.200000  
4,2,1623.348684  
4,2,19584.764706  
4,2,1828.714286  
4,2,3075.522222  
4,2,2615.879581  
4,2,3401.967391  
4,2,10897.105263  
4,2,5547.612245  
4,2,1539.877778  
4,2,3785.611111  
4,2,5810.201389  
4,2,2228.660714  
4,2,6176.619318  
4,2,1735.641026  
4,2,1715.213235  
4,2,5281.142857  
4,2,1544.000000  
4,2,3300.866667  
4,2,3296.898438

4,2,7491.112500  
4,2,2067.666667  
4,2,2211.044218  
4,2,9415.550000  
4,2,1845.179487  
4,2,2988.100000  
4,2,2130.098160  
4,2,2122.838816  
4,2,1616.636364  
4,2,1580.585937  
4,2,1591.026316  
4,2,2006.666667  
4,2,3830.785714  
4,2,4979.616279  
4,2,1817.868056  
4,2,4575.463068  
4,2,1844.714744  
4,2,4269.885714  
4,2,2666.090909  
4,2,3576.093750  
4,2,2068.100000  
4,2,4425.260593  
4,2,3570.775568  
4,2,2034.959302  
4,2,3105.760000  
4,2,2529.983696  
4,2,13368.041667  
4,2,2072.621622  
4,2,2288.776596  
4,2,3488.330000  
4,2,3995.961326  
4,2,1628.047739  
4,2,2201.690955  
4,2,3134.547170  
4,2,3765.516509  
4,2,4661.670732  
4,2,1928.030303  
4,2,2812.428571  
4,2,2644.660377  
4,2,3757.446328  
4,2,4607.660714  
4,2,2662.759434  
4,2,3101.192308  
4,2,3226.764706  
4,2,2038.342105  
4,2,5484.423611  
4,2,2133.877551  
4,2,2324.178571  
4,2,2969.849359  
4,2,2118.600000  
4,2,3059.682692  
4,2,1592.975610  
4,2,6419.289474  
4,2,3728.091346  
4,2,3202.678571  
4,2,5353.951923  
4,2,4184.852071  
4,2,8313.695652  
4,2,1939.776042  
4,2,2065.057692  
4,2,4308.680000  
4,2,1549.066176  
4,2,2863.500000  
4,2,5143.112903  
4,2,2561.593085  
4,2,3447.906250

4,2,4412.303279  
4,2,1965.428571  
4,2,2665.547872  
4,2,3687.500000  
4,2,2822.117647  
4,2,2005.451149  
4,2,3009.905263  
4,2,5121.002841  
4,2,2564.037975  
4,2,13152.902174  
4,2,8046.368421  
4,2,3769.445000  
4,2,7575.057292  
4,2,3696.375000  
4,2,6340.683140  
4,2,2951.728261  
4,2,5392.511628  
4,2,1752.285714  
4,2,2916.850000  
4,2,3408.967949  
4,2,10896.981132  
4,2,1853.010050  
4,2,7802.440217  
4,2,4118.823077  
4,2,2495.562500  
4,2,1581.706633  
4,2,2365.386364  
4,2,2019.369565  
4,2,2309.015625  
4,2,2742.570000  
4,2,7211.427632  
4,2,5803.969388  
4,2,1829.144578  
4,2,2128.453125  
4,2,5714.857955  
4,2,3490.472222  
4,2,2405.509615  
4,2,11250.500000  
4,2,2190.000000  
4,2,5770.911765  
4,2,6210.975000  
4,2,2648.248889  
4,2,6743.421053  
4,2,11329.776596  
4,2,1695.945946  
4,2,2740.323171  
4,2,3522.230769  
4,2,2144.015306  
4,2,2336.321023  
4,2,1895.655172  
4,2,2888.250000  
4,2,3661.990385  
4,2,2150.845000  
4,2,3426.802326  
4,2,3815.017442  
4,2,1757.260090  
4,2,5928.079268  
4,2,1633.750000  
4,2,6799.097561  
4,2,6865.244898  
4,2,1499.843750  
4,2,1804.295455  
4,2,4597.778061  
4,2,5092.000000  
4,2,1859.182927  
4,2,12247.777778

4,2,4494.162162  
4,2,1740.912500  
4,2,2424.107143  
4,2,13993.411932  
4,2,1842.882353  
4,2,1671.250000  
4,2,2371.862069  
4,2,1549.661111  
4,2,2094.968750  
4,2,1875.256410  
4,2,14523.569915  
4,2,5541.619565  
4,2,4352.619048  
4,2,1910.062500  
4,2,6699.107143  
4,2,2919.598765  
4,2,2336.913043  
4,2,5826.914474  
4,2,3819.953052  
4,2,1956.972222  
4,2,2477.147059  
4,2,2355.193717  
4,2,2545.976744  
4,2,2091.958333  
4,2,2850.096154  
4,2,12569.366822  
4,2,14959.990625  
4,2,7423.560811  
4,2,3052.040094  
4,2,1977.101974  
4,2,4457.285000  
4,2,2869.986486  
4,2,2573.852564  
4,2,1684.400000  
4,2,1608.629630  
4,2,1518.230263  
4,2,17326.949153  
4,2,1541.546053  
4,2,5345.843137  
4,2,3319.449735  
4,2,4953.615385  
4,2,2347.958333  
4,2,3915.547619  
4,2,2855.600000  
4,2,3946.551020  
4,2,3842.318182  
4,2,1757.476562  
4,2,6129.270000  
4,2,2442.540541  
4,2,2584.436047  
4,2,1755.173077  
4,2,1641.416667  
4,2,2084.502500  
4,2,2032.902778  
4,2,1763.221875  
4,2,2869.040000  
4,2,4438.305556  
4,2,1566.153846  
4,2,1556.158537  
4,2,4127.064394  
4,2,2318.032895  
4,2,3334.250000  
4,2,1923.166667  
4,2,3128.129902  
4,2,1851.200000  
4,2,2332.773437

4,2,5416.057500  
4,2,4877.540094  
4,2,2210.250000  
4,2,2310.944079  
4,2,4069.560976  
4,2,3336.458333  
4,2,4534.315789  
4,2,3417.791667  
4,2,4122.740132  
4,2,1562.632353  
4,2,3213.601562  
4,2,2847.643750  
4,2,2285.472561  
4,2,2152.495000  
4,2,3085.616477  
4,2,1551.187500  
4,2,5148.531915  
4,2,8254.474490  
4,2,26763.375000  
4,2,7378.625000  
4,2,5349.532609  
4,2,2267.062500  
4,2,2547.583333  
4,2,2999.436275  
4,2,4696.005208  
4,2,3060.400000  
4,2,2868.444785  
4,2,10075.397436  
4,2,1524.100962  
4,2,1636.401786  
4,2,2699.562500  
4,2,4854.187500  
4,2,5268.537791  
4,2,5455.809524  
4,2,3710.277778  
4,2,1728.276074  
4,2,5038.670000  
4,2,1791.489130  
4,2,2882.329843  
4,2,6993.835526  
4,2,2612.143590  
4,2,7104.764423  
4,2,5117.795455  
4,2,2148.516588  
4,2,2557.083333  
4,2,2158.018617  
4,2,15542.677632  
4,2,4187.283333  
4,2,2508.762500  
4,2,4278.697674  
4,2,2930.644444  
4,2,3729.663462  
4,2,4659.281250  
4,2,4154.619318  
4,2,2062.979592  
4,2,2700.847222  
4,2,4794.276596  
4,2,19461.864130  
4,2,2624.333333  
4,2,3424.730114  
4,2,1821.617647  
4,2,1661.764706  
4,2,2627.667683  
4,2,2875.400000  
4,2,1542.038462  
4,2,4126.648026

4,2,7401.915179  
4,2,4156.755556  
4,2,4053.878205  
4,2,2109.875000  
4,2,4542.752451  
4,2,5198.536585  
4,2,2323.622517  
4,2,1921.166667  
4,2,3507.500000  
4,2,6689.979532  
4,2,5390.625000  
4,2,24403.402542  
4,2,1734.333333  
4,2,2540.542683  
4,2,3854.865741  
4,2,4639.765625  
4,2,3557.791667  
4,2,1579.819444  
4,2,2101.839286  
4,2,14426.700581  
4,2,3273.161137  
4,2,6728.517964  
4,2,15994.245509  
4,2,4494.000000  
4,2,3355.904255  
4,2,3632.428571  
4,2,1535.723214  
4,2,2144.569712  
4,2,1899.044199  
4,2,4467.228723  
4,2,1746.743056  
4,2,2527.944444  
4,2,3822.871429  
4,2,1664.546429  
4,2,2162.600000  
4,2,1530.338816  
4,2,16800.346154  
4,2,2150.730769  
4,2,5768.362500  
4,2,3642.616848  
4,2,2426.120000  
4,2,5025.609756  
4,2,7538.534884  
4,2,3552.500000  
4,2,2478.511111  
4,2,4783.067308  
4,2,2719.807692  
4,2,2327.728723  
4,2,2098.597826  
4,2,5098.577778  
4,2,3833.356061  
4,2,2736.850000  
4,2,2167.469136  
4,2,3594.221910  
4,2,3660.367925  
4,2,7534.336207  
4,2,2666.000000  
4,2,11855.000000  
4,2,2792.607143  
4,2,2234.139423  
4,2,11102.714286  
4,2,6640.756098  
4,2,1894.309783  
4,2,9412.883152  
4,2,5238.869565  
4,2,6206.037500

4,2,3457.320122  
4,2,3976.705189  
4,2,8796.351064  
4,2,9932.663462  
4,2,1565.750000  
4,2,2277.709459  
4,2,1904.447368  
4,2,5023.333333  
4,2,5876.328125  
4,2,1501.954545  
4,2,1946.350000  
4,2,3977.134615  
4,2,2386.707547  
4,2,2349.218750  
4,2,1732.895408  
4,2,3208.371711  
4,2,2641.125000  
4,2,4890.423077  
4,2,2605.775641  
4,2,1817.125000  
4,2,2363.020000  
4,2,1955.920455  
4,2,10300.200000  
4,2,4754.780612  
4,2,1964.960938  
4,2,37509.806452  
4,2,1658.738636  
4,2,5003.500000  
4,2,2868.400000  
4,2,1812.447917  
4,2,4179.972826  
4,2,5833.468531  
4,2,6330.349359  
4,2,3849.244318  
4,2,11485.343750  
4,2,3756.976744  
4,2,2662.439103  
4,2,2043.125683  
4,2,7830.602823  
4,2,4413.350000  
4,2,1581.153846  
4,2,3911.422222  
4,2,4302.713983  
4,2,3121.310976  
4,2,4243.954268  
4,2,2830.556373  
4,2,3903.625000  
4,2,6000.820652  
4,2,2842.122222  
4,2,8458.207317  
4,2,1903.548611  
4,2,1543.241477  
4,2,7030.093023  
4,2,6617.117647  
4,2,2111.344444  
4,2,2945.144886  
4,2,1543.027027  
4,2,1556.122995  
4,2,1631.391667  
4,2,6080.625000  
4,2,2419.130682  
4,2,6788.692308  
4,2,8471.712500  
4,2,3391.317130  
4,2,2452.861842  
4,2,4137.872642

4,2,11753.000000  
4,2,6820.823718  
4,2,1606.000000  
4,2,3354.241477  
4,2,2619.840000  
4,2,9259.120763  
4,2,2364.564103  
4,2,1852.264516  
4,2,5830.271930  
4,2,4982.861111  
4,2,4256.439024  
4,2,5876.158333  
4,2,2900.741071  
4,2,3486.274510  
4,2,7796.817857  
4,2,6583.561404  
4,2,4605.127907  
4,2,3477.520833  
4,2,4419.447115  
4,2,3051.910000  
4,2,2462.405405  
4,2,6311.500000  
4,2,8211.495098  
4,2,6487.783019  
4,2,3946.906250  
4,2,4790.262500  
4,2,2082.671569  
4,2,2665.958140  
4,2,5513.312500  
4,2,2072.250000  
4,2,3655.071023  
4,2,3434.700000  
4,2,2023.846154  
4,2,1520.937500  
4,2,3659.760870  
4,2,7143.080882  
4,2,2969.415179  
4,2,1613.325472  
4,2,10455.865741  
4,2,19086.375000  
4,2,5557.519886  
4,2,2560.581522  
4,2,2226.560976  
4,2,3547.086735  
4,2,3265.662162  
5,1,2337.562500  
5,1,1595.952381  
5,1,2876.394231  
5,1,3415.357500  
5,1,1528.658537  
5,1,5658.048077  
5,1,3092.411585  
5,1,4440.322674  
5,1,5263.000000  
5,1,46122.240132  
5,1,2443.307692  
5,1,11898.628378  
5,1,5605.937500  
5,1,1968.520349  
5,1,2734.071429  
5,1,4974.763889  
5,1,3016.846591  
5,1,2289.716837  
5,1,2386.444444  
5,1,7208.818182  
5,1,2588.948718

5,1,3511.875000  
5,1,1684.502551  
5,1,3188.533333  
5,1,8993.968750  
5,1,11702.489130  
5,1,34805.551282  
5,1,1804.010870  
5,1,6894.079545  
5,1,3936.957447  
5,1,1641.625000  
5,1,6175.365132  
5,1,3140.921053  
5,1,1954.875000  
5,1,5726.143293  
5,1,3723.977564  
5,1,2667.548077  
5,1,1634.171875  
5,1,1608.131410  
5,1,8385.500000  
5,1,2286.696023  
5,1,11610.808511  
5,1,2298.589286  
5,1,1773.279070  
5,1,2148.529412  
5,1,2534.250000  
5,1,27144.918750  
5,1,6565.872093  
5,1,13534.996875  
5,1,6888.934211  
5,1,16323.397436  
5,1,8260.122449  
5,1,8610.402174  
5,1,2915.808140  
5,1,8872.666667  
5,1,3001.194767  
5,1,2068.664062  
5,1,17056.300439  
5,1,38906.869048  
5,1,7288.479167  
5,1,36022.921053  
5,1,14382.350000  
5,1,1790.135638  
5,1,5024.303030  
5,1,5374.033333  
5,1,3505.747340  
5,1,15934.659884  
5,1,10352.360577  
5,1,145455.660256  
5,1,1852.899457  
5,1,13041.646277  
5,1,3174.139535  
5,1,4111.341912  
5,1,3583.925926  
5,1,2033.994318  
5,1,2445.914474  
5,1,18387.044271  
5,1,176569.025000  
5,1,5041.755814  
5,1,8226.082500  
5,1,2957.506250  
5,1,9442.674419  
5,1,1753.079268  
5,1,6490.473684  
5,1,6205.657500  
5,1,3483.296053  
5,1,5319.356481

5,1,9887.021341  
5,1,1525.329861  
5,1,1767.948718  
5,1,24476.102041  
5,1,3537.622642  
5,1,2641.718750  
5,1,1696.194149  
5,1,7283.366667  
5,1,1895.052083  
5,1,4547.797297  
5,1,41875.573529  
5,1,4042.625000  
5,1,1563.087629  
5,1,3956.347826  
5,1,2764.792969  
5,1,2623.758721  
5,1,2359.875000  
5,1,1788.854651  
5,1,17928.850000  
5,1,1573.125000  
5,1,2799.579545  
5,1,2608.328947  
5,1,1708.158537  
5,1,1994.621324  
5,1,3318.091463  
5,1,4074.615854  
5,1,64389.258721  
5,1,6446.581731  
5,1,5092.752551  
5,1,2901.035714  
5,1,1870.402500  
5,1,8641.750000  
5,1,2068.450000  
5,1,2278.261792  
5,1,2535.500000  
5,1,3187.492647  
5,1,4621.540865  
5,1,27402.727273  
5,1,71721.440625  
5,1,2691.050000  
5,1,6485.889706  
5,1,2086.054878  
5,1,1900.561111  
5,1,25428.661290  
5,1,7090.325000  
5,1,2536.900000  
5,1,4675.094444  
5,1,171967.243056  
5,1,1525.412791  
5,1,76610.075000  
5,1,6234.175676  
5,1,1707.902439  
5,1,4197.118750  
5,1,2805.414286  
5,1,7850.910714  
5,1,56084.507143  
5,1,7883.600000  
5,1,2588.796875  
5,1,2668.321429  
5,1,5256.414286  
5,1,1513.519231  
5,1,35411.759615  
5,1,35724.315789  
5,1,9524.130435  
5,1,3673.433333  
5,1,2090.656250

5,1,5803.000000  
5,1,3209.000000  
5,1,5902.135135  
5,1,5513.804245  
5,1,4449.386364  
5,1,1877.210938  
5,1,1618.916667  
5,1,96633.965278  
5,1,1939.631250  
5,1,1674.209302  
5,1,48168.437500  
5,1,1678.705882  
5,1,15078.125000  
5,1,2957.581250  
5,1,4135.866667  
5,1,3222.572368  
5,1,121670.025641  
5,1,8853.344828  
5,1,3856.302083  
5,1,1793.153846  
5,1,17038.920732  
5,1,2044.686111  
5,1,2790.892857  
5,1,41012.607143  
5,1,3449.061224  
5,1,2068.283088  
5,1,7019.093750  
5,1,4165.957317  
5,1,1801.000000  
5,1,3007.180000  
5,1,4227.557927  
5,1,3294.649457  
5,1,5142.593750  
5,1,5176.973684  
5,1,1516.386364  
5,1,1676.619048  
5,1,12887.729167  
5,1,3031.335526  
5,1,2669.000000  
5,1,3227.175000  
5,1,3793.065476  
5,1,1602.893750  
5,1,6786.824219  
5,1,7457.000000  
5,1,2580.589744  
5,1,1894.406250  
5,1,1887.583333  
5,1,61359.736842  
5,1,2000.421875  
5,1,24499.951087  
5,1,6257.607500  
5,1,2338.819767  
5,1,12242.776256  
5,1,112884.565341  
5,1,1922.228723  
5,1,7899.746528  
5,1,21425.250000  
5,1,3024.272277  
5,1,4815.937500  
5,1,2191.666667  
5,1,2891.566667  
5,1,4979.705882  
5,1,4291.989583  
5,1,8002.482759  
5,1,1915.000000  
5,1,1583.857639

5,1,52978.641026  
5,1,3494.048780  
5,1,5431.333333  
5,1,14523.828125  
5,1,6754.898438  
5,1,57223.646875  
5,1,1587.091463  
5,1,151140.447368  
5,1,1639.125000  
5,1,2304.833333  
5,1,21154.465278  
5,1,2294.722500  
5,1,1517.171875  
5,1,1843.281915  
5,1,3620.843750  
5,1,7264.400000  
5,1,1939.818966  
5,1,2586.896341  
5,1,5326.758333  
5,1,1678.496324  
5,1,2924.915761  
5,1,3577.558824  
5,1,2293.604651  
5,1,4358.887500  
5,1,4788.529167  
5,1,2066.750000  
5,1,2727.187500  
5,1,2207.779412  
5,1,71350.840278  
5,1,32288.080645  
5,1,1572.541667  
5,1,37222.233871  
5,1,25560.935811  
5,1,1757.869565  
5,1,2781.714286  
5,1,58585.855263  
5,1,33277.125000  
5,1,3333.619565  
5,1,3053.590909  
5,1,2132.488372  
5,1,1536.550000  
5,1,4580.500000  
5,1,1935.416667  
5,1,25902.038462  
5,1,2693.266667  
5,1,9616.189103  
5,1,1838.409722  
5,1,1588.813559  
5,1,2554.681034  
5,1,2209.660714  
5,1,2573.822674  
5,1,2128.896739  
5,1,3321.162234  
5,1,1636.308824  
5,1,2973.187500  
5,1,17266.494318  
5,1,1646.500000  
5,1,3573.318182  
5,1,6269.860465  
5,1,14111.348837  
5,1,2062.732558  
5,1,3987.459184  
5,1,4991.114286  
5,1,5026.838235  
5,1,145024.313776  
5,1,4502.948718

5,1,181172.585227  
5,1,35501.000000  
5,1,6454.971429  
5,1,125485.573529  
5,1,2221.341837  
5,1,2148.487179  
5,1,1547.422619  
5,1,2799.291667  
5,1,33162.928977  
5,1,85854.118243  
5,1,2173.116667  
5,1,2004.700000  
5,1,2148.567568  
5,1,3305.763514  
5,1,11147.777174  
5,1,4758.326087  
5,1,38563.571429  
5,1,5378.750000  
5,1,1719.045213  
5,1,6695.510870  
5,1,148307.371795  
5,1,6224.888889  
5,1,1499.984375  
5,1,1862.189189  
5,1,1719.244792  
5,1,85630.850694  
5,1,2527.453125  
5,1,2051.978261  
5,1,8269.141026  
5,1,2412.216912  
5,1,8663.000000  
5,1,2652.552419  
5,1,1829.697222  
5,1,2945.718750  
5,1,7369.632653  
5,1,31867.729730  
5,1,12080.970238  
5,1,2326.890244  
5,1,6875.860294  
5,1,2049.083333  
5,1,3427.190625  
5,1,1550.562500  
5,1,4578.065476  
5,1,2496.478659  
5,1,1672.239583  
5,1,1915.180851  
5,1,77343.500000  
5,1,8416.613636  
5,1,31757.111842  
5,1,1949.574468  
5,1,1520.941860  
5,1,3688.979167  
5,1,5025.268750  
5,1,2419.608696  
5,1,2981.062500  
5,1,2710.225806  
5,1,1571.628571  
5,1,2224.875000  
5,1,2865.582317  
5,1,5415.059524  
5,1,4465.454545  
5,1,1640.727273  
5,1,2601.750000  
5,1,1607.125000  
5,1,1956.510417  
5,1,8051.500000

5,1,1885.975000  
5,1,33516.812500  
5,1,1686.546512  
5,1,7560.549342  
5,1,71145.000000  
5,1,2705.750000  
5,1,10677.619048  
5,1,3224.372340  
5,1,1861.574468  
5,1,1570.266667  
5,1,11460.084239  
5,1,5425.585366  
5,1,15049.324324  
5,1,7937.662162  
5,1,2165.500000  
5,1,1758.976744  
5,1,7706.062500  
5,1,7826.268293  
5,1,63867.420455  
5,1,4931.665761  
5,1,6627.531250  
5,1,2137.910714  
5,1,3311.920732  
5,1,1504.289474  
5,1,6492.705882  
5,1,2295.562827  
5,1,1648.358108  
5,1,2041.153409  
5,1,4031.830882  
5,1,2273.380952  
5,1,3094.092593  
5,1,2860.812500  
5,1,3220.911585  
5,1,4332.914634  
5,1,37598.000000  
5,1,3077.846591  
5,1,1726.675000  
5,1,7733.395349  
5,1,2082.360714  
5,1,2204.558333  
5,1,4979.500000  
5,1,1749.797619  
5,1,1754.418750  
5,1,1701.479651  
5,1,2289.954545  
5,1,2429.073171  
5,1,2554.010870  
5,1,19624.662162  
5,1,32423.851064  
5,1,5244.571429  
5,1,1924.694444  
5,1,1623.271739  
5,1,18055.460526  
5,1,2156.324324  
5,1,31898.170732  
5,1,2615.141892  
5,1,1515.884615  
5,1,2121.688525  
5,1,11439.608696  
5,1,24609.422619  
5,1,13040.588816  
5,1,2622.005882  
5,1,2838.132812  
5,1,3422.062500  
5,1,2269.559211  
5,1,1960.585366

5,1,7075.519231  
5,1,18537.923913  
5,1,4794.746711  
5,1,3054.875000  
5,1,5979.895161  
5,1,1637.871795  
5,1,2946.398437  
5,1,4844.800000  
5,1,16109.967105  
5,1,2817.321023  
5,1,48555.636364  
5,1,3273.714286  
5,1,2434.150000  
5,1,5528.344828  
5,1,2233.125000  
5,1,2004.994186  
5,1,27508.333333  
5,1,11817.000000  
5,1,2491.208333  
5,1,1515.391304  
5,1,5235.437500  
5,1,1550.665441  
5,1,4272.267857  
5,1,3459.280702  
5,1,2732.000000  
5,1,3733.329268  
5,1,1657.750000  
5,1,11033.304878  
5,1,8712.625000  
5,1,4936.103723  
5,1,8177.471154  
5,1,1901.718750  
5,1,4900.578125  
5,1,2186.700758  
5,1,82886.929487  
5,1,4060.294521  
5,1,4344.477273  
5,1,28806.401163  
5,1,13521.940217  
5,1,5295.541667  
5,1,1735.477273  
5,1,5235.275510  
5,1,37010.492424  
5,1,1632.412500  
5,1,1705.013298  
5,1,8533.020161  
5,1,6221.375000  
5,1,1662.617188  
5,1,3052.744898  
5,1,1739.578125  
5,1,1901.137500  
5,1,2058.426829  
5,1,3717.683824  
5,1,3221.000000  
5,1,2408.271341  
5,1,1925.348684  
5,1,6145.863971  
5,1,1677.769531  
5,1,2361.400000  
5,1,10763.454861  
5,1,5203.152174  
5,1,2962.823864  
5,1,1567.060976  
5,1,7061.178571  
5,1,5593.428571  
5,1,18259.437500

5,1,1499.483333  
5,1,1917.125000  
5,1,2888.732143  
5,1,3519.500000  
5,1,5374.166667  
5,1,2563.731618  
5,1,3299.615385  
5,1,1515.740132  
5,1,4111.797727  
5,1,4199.272436  
5,1,3207.875000  
5,1,1954.500000  
5,1,1563.250000  
5,1,4966.663462  
5,1,5695.622222  
5,1,2065.716463  
5,1,1739.024390  
5,1,60300.585938  
5,1,6368.190217  
5,1,2276.961735  
5,1,55865.765625  
5,1,8254.306250  
5,1,2651.285714  
5,1,5771.881250  
5,1,3294.129808  
5,1,2714.638298  
5,1,9031.800000  
5,1,3003.221154  
5,1,1520.166667  
5,1,4929.546196  
5,1,2183.500000  
5,1,1720.426829  
5,1,1679.476064  
5,1,1873.625000  
5,1,2792.955882  
5,1,2324.184211  
5,1,1765.701087  
5,1,7436.500000  
5,1,4612.352941  
5,1,12230.245614  
5,1,1616.561047  
5,1,1842.756250  
5,1,1557.927500  
5,1,4242.912500  
5,1,19667.058824  
5,1,12542.673913  
5,1,8901.000000  
5,1,8115.993644  
5,1,3539.869565  
5,1,36198.625000  
5,1,1775.228261  
5,1,128104.036111  
5,1,16098.044118  
5,1,14458.652344  
5,1,1725.441176  
5,1,3773.562500  
5,1,6933.853125  
5,1,2645.897727  
5,1,2496.583333  
5,1,2615.262755  
5,1,1980.571429  
5,1,28792.051282  
5,1,1690.617949  
5,1,1925.084239  
5,1,5347.625000  
5,1,198839.733871

5,1,1512.805233  
5,1,1643.025000  
5,1,4262.707317  
5,1,3292.375000  
5,1,2832.058824  
5,1,8343.459559  
5,1,9020.250000  
5,1,1703.061047  
5,1,3145.343023  
5,1,1585.689189  
5,1,5803.173913  
5,1,2167.167553  
5,1,6067.838415  
5,1,1523.142857  
5,1,1938.763021  
5,1,26402.236111  
5,1,48739.318750  
5,1,3189.500000  
5,1,2515.726744  
5,1,3505.900000  
5,1,3693.633333  
5,1,39133.326087  
5,1,1770.681250  
5,1,3278.605263  
5,1,18878.178571  
5,1,1903.705128  
5,1,2594.551829  
5,1,1555.410714  
5,1,1593.033333  
5,1,2825.895833  
5,1,3655.181818  
5,1,1984.199405  
5,1,3825.615385  
5,1,1610.573529  
5,1,6991.939394  
5,1,8026.837209  
5,1,1955.000000  
5,1,9933.955729  
5,1,2588.231383  
5,1,22534.014706  
5,1,2592.493056  
5,1,2219.789062  
5,1,5199.836957  
5,1,14305.733333  
5,1,1599.756098  
5,1,1676.641026  
5,1,1935.465116  
5,1,14606.568750  
5,1,1584.540541  
5,1,2913.180272  
5,1,2374.500000  
5,1,4107.000000  
5,1,2673.500000  
5,1,28232.508065  
5,1,2571.677632  
5,1,3320.625000  
5,1,8897.224138  
5,1,3760.890625  
5,1,1755.914634  
5,1,2608.744565  
5,1,11650.375000  
5,1,29821.705882  
5,1,75688.509615  
5,1,2971.420732  
5,1,5256.371951  
5,1,1971.585366

5,1,1840.785714  
5,1,5831.083333  
5,1,5719.207317  
5,1,3414.416667  
5,1,1698.548913  
5,1,3216.878289  
5,1,46091.224265  
5,1,3809.562500  
5,1,8117.364286  
5,1,1953.086957  
5,1,2394.875000  
5,1,4834.925595  
5,1,55561.000000  
5,1,3992.375000  
5,1,2724.187500  
5,1,2655.246324  
5,1,2893.412500  
5,1,1657.681818  
5,1,3119.627660  
5,1,16613.875000  
5,1,9280.607500  
5,1,1974.991848  
5,1,23519.380682  
5,1,6709.343750  
5,1,1727.519737  
5,1,37990.552083  
5,1,2366.310714  
5,1,6260.085106  
5,1,3615.877660  
5,1,2088.110294  
5,1,5984.129630  
5,1,63104.903061  
5,1,1550.866667  
5,1,135697.778846  
5,1,1522.715625  
5,1,3195.200000  
5,1,1960.669271  
5,1,4713.637500  
5,1,2663.795732  
5,1,1842.024390  
5,1,2966.458333  
5,1,8377.690476  
5,1,5087.731707  
5,1,14541.543750  
5,1,6288.101064  
5,1,1768.284722  
5,1,4793.043269  
5,1,4281.656250  
5,1,3014.360465  
5,1,21782.487069  
5,1,1525.313953  
5,1,6606.209302  
5,1,4362.195513  
5,1,2447.021739  
5,1,1704.660714  
5,1,2314.537162  
5,1,24534.187500  
5,1,6889.032895  
5,1,3001.571429  
5,1,1900.571429  
5,1,5241.000000  
5,1,2558.348485  
5,1,9065.297170  
5,1,1512.962500  
5,1,1965.857500  
5,1,2547.425676

5,1,4222.994048  
5,1,2770.111111  
5,1,7908.716867  
5,1,120836.147436  
5,1,2411.884868  
5,1,1835.414062  
5,1,4421.000000  
5,1,95507.400000  
5,1,1676.333333  
5,1,1835.000000  
5,1,1902.681818  
5,1,8135.854839  
5,1,3330.045918  
5,1,139430.487805  
5,1,1806.072368  
5,1,2961.997340  
5,1,2912.000000  
5,1,3405.777174  
5,1,6492.190476  
5,1,1888.750000  
5,1,11969.071429  
5,1,1769.984043  
5,1,18575.997024  
5,1,2861.434211  
5,1,2819.111111  
5,1,1666.783784  
5,1,3428.157609  
5,1,9423.186224  
5,1,2680.494186  
5,1,2323.888889  
5,1,3292.479839  
5,1,2873.897059  
5,1,1964.048077  
5,1,2402.389535  
5,1,2405.550000  
5,1,10691.592742  
5,1,21128.817308  
5,1,1799.344444  
5,1,8068.850000  
5,1,4670.588235  
5,1,1820.353261  
5,1,6110.096875  
5,1,21333.505319  
5,1,2246.547619  
5,1,2389.641667  
5,1,1585.793478  
5,1,2067.579545  
5,1,3408.117188  
5,1,2389.714286  
5,1,1971.031250  
5,1,4387.483871  
5,1,17572.681818  
5,1,1529.634146  
5,1,17111.207317  
5,1,2152.200000  
5,1,1748.162791  
5,1,3605.765000  
5,1,2488.105469  
5,1,27463.569444  
5,1,3262.372093  
5,1,1990.227273  
5,1,2871.625000  
5,1,1570.000000  
5,1,1676.115854  
5,1,45985.937500  
5,1,7729.061170

5,1,9639.800000  
5,1,2156.821970  
5,1,3640.846774  
5,1,3714.428571  
5,1,2559.565217  
5,1,9596.810976  
5,1,21854.640000  
5,1,6195.486111  
5,1,3423.756098  
5,1,2446.753472  
5,1,2161.153125  
5,1,2702.909091  
5,1,5176.906250  
5,1,9678.500000  
5,1,4262.444444  
5,1,6943.785714  
5,1,2193.986111  
5,1,4596.973958  
5,1,5397.483333  
5,1,8595.116279  
5,1,2544.130814  
5,1,4749.942073  
5,1,24700.621951  
5,1,23901.677419  
5,1,5815.125000  
5,1,21018.268293  
5,1,5665.721354  
5,1,2240.780488  
5,1,1694.959302  
5,1,13949.233333  
5,1,1812.820755  
5,1,26156.185714  
5,1,3578.125000  
5,1,2711.878788  
5,1,1603.925676  
5,1,1839.304878  
5,1,6826.255435  
5,1,6262.750000  
5,1,2411.357558  
5,1,2157.360294  
5,1,47839.535326  
5,1,2927.460938  
5,1,2652.628834  
5,1,3276.131250  
5,1,17721.086538  
5,1,3178.500000  
5,1,1532.875000  
5,1,6275.984375  
5,1,9774.680851  
5,1,2971.776316  
5,1,2587.052632  
5,1,6987.957386  
5,1,4643.818182  
5,1,4830.991071  
5,1,1955.435714  
5,1,2038.182927  
5,1,1583.439189  
5,1,6789.162500  
5,1,2292.200000  
5,1,3400.096429  
5,1,19404.444079  
5,1,2034.200000  
5,1,3599.614130  
5,1,7082.000000  
5,1,5420.089286  
5,1,2300.540541

5,1,2868.173913  
5,1,5087.247093  
5,1,1884.769737  
5,1,1915.941176  
5,1,7229.848214  
5,1,1780.712766  
5,1,36406.411111  
5,1,3600.882075  
5,1,118598.232558  
5,1,3586.414894  
5,1,1748.817073  
5,1,1610.034884  
5,1,4537.372685  
5,1,5485.987069  
5,1,2977.416667  
5,1,8222.750000  
5,1,2623.927083  
5,1,3646.642857  
5,1,24871.250000  
5,1,18734.900000  
5,1,52116.400000  
5,1,3711.419811  
5,1,3133.600000  
5,1,2876.447917  
5,1,1738.458333  
5,1,39532.855978  
5,1,1623.302326  
5,1,100386.487179  
5,1,2061.375000  
5,1,15768.500000  
5,1,3069.500000  
5,1,1571.541667  
5,1,7056.165323  
5,1,4072.342742  
5,1,5982.702128  
5,1,2483.790698  
5,1,1762.244048  
5,1,2281.031250  
5,1,1853.404412  
5,1,19504.169872  
5,1,6897.551282  
5,1,3055.457143  
5,1,2303.035714  
5,1,1662.522059  
5,1,2490.295455  
5,1,29908.763514  
5,1,1713.527778  
5,1,5445.117857  
5,1,86129.085714  
5,1,2677.928571  
5,1,1966.265957  
5,1,1826.280488  
5,1,4011.275641  
5,1,6444.151316  
5,1,95141.000000  
5,1,95085.390244  
5,1,5424.187500  
5,1,2191.562500  
5,1,1689.281250  
5,1,3436.700000  
5,1,15730.000000  
5,1,4375.968750  
5,1,2173.044444  
5,1,1766.428571  
5,1,17440.054487  
5,1,1928.429348

5,1,2417.791667  
5,1,33527.807692  
5,1,1524.225610  
5,1,1887.208333  
5,1,3177.425000  
5,1,1562.586957  
5,1,1855.363636  
5,1,1563.000000  
5,1,4558.260870  
5,1,3560.284314  
5,1,4239.078818  
5,1,16322.428571  
5,1,3000.865854  
5,1,1764.764331  
5,1,8771.504630  
5,1,27748.572368  
5,1,1989.679245  
5,1,5079.664773  
5,1,2353.473684  
5,1,3584.604651  
5,1,2330.278571  
5,1,12822.420455  
5,1,2037.260000  
5,1,2701.000000  
5,1,22660.442073  
5,1,10468.809524  
5,1,2113.500000  
5,1,51993.557292  
5,1,7010.602273  
5,1,6181.761905  
5,1,2825.595745  
5,1,1836.085526  
5,1,4875.537500  
5,1,4666.076220  
5,1,2696.011111  
5,1,1887.478261  
5,1,7244.912791  
5,1,2270.812500  
5,1,6416.400000  
5,1,13860.451705  
5,1,17422.089286  
5,1,8998.583333  
5,1,2244.000000  
5,1,52153.707143  
5,1,1808.512195  
5,1,38041.838710  
5,1,2097.562500  
5,1,1764.339286  
5,1,3528.437500  
5,1,9726.157895  
5,1,1796.750000  
5,1,15317.951220  
5,1,6401.035000  
5,1,2540.664773  
5,1,60820.158537  
5,1,2385.602941  
5,1,1623.718750  
5,1,5213.669643  
5,1,76781.576923  
5,1,7952.358696  
5,1,2655.520833  
5,1,4327.744186  
5,1,13735.611111  
5,1,2339.344262  
5,1,1624.180147  
5,1,7776.178571

5,1,33555.475610  
5,1,31198.423611  
5,1,1853.937500  
5,1,49114.506410  
5,1,10121.315789  
5,1,3499.421053  
5,1,2135.071429  
5,1,1551.801829  
5,1,3850.375000  
5,1,1525.988636  
5,1,2619.468750  
5,1,12049.300000  
5,1,2047.475000  
5,1,4995.110294  
5,1,6988.920455  
5,1,7469.821429  
5,1,2104.027778  
5,1,50224.422222  
5,1,3517.756098  
5,1,2066.549242  
5,1,3691.075000  
5,1,2609.718750  
5,1,1580.763889  
5,1,2259.693182  
5,1,1633.635135  
5,1,1686.191327  
5,1,1798.803571  
5,1,1735.043478  
5,1,3236.853261  
5,1,6821.779412  
5,1,2731.750000  
5,1,8195.238372  
5,1,1859.544118  
5,1,9359.551724  
5,1,2096.505682  
5,1,2161.033088  
5,1,4219.171429  
5,1,1982.889535  
5,1,5726.625000  
5,1,1577.941860  
5,1,1723.363636  
5,1,4296.718750  
5,1,2646.630435  
5,1,9774.600000  
5,1,12279.041667  
5,1,57176.691667  
5,1,7632.243902  
5,1,16502.576389  
5,1,26765.861963  
5,1,5528.777778  
5,1,2425.978723  
5,1,46496.517361  
5,1,4383.455882  
5,1,53830.906977  
5,1,11061.659574  
5,1,3450.272727  
5,1,2160.173295  
5,1,4241.000000  
5,1,3943.205357  
5,1,2494.062500  
5,1,68346.315217  
5,1,1757.911111  
5,1,1567.406250  
5,1,2322.258523  
5,1,1878.275641  
5,1,31698.275000

5,1,3738.756757  
5,1,4547.222826  
5,1,3883.048077  
5,1,1991.898810  
5,1,10815.468750  
5,1,4058.488372  
5,1,165667.937500  
5,1,11045.239224  
5,1,1577.952381  
5,1,2081.945000  
5,1,3354.482143  
5,1,33477.321429  
5,1,9127.961538  
5,1,28089.322674  
5,1,9024.333333  
5,1,18501.531250  
5,1,7302.925676  
5,1,10759.598837  
5,1,3706.108974  
5,1,23096.280405  
5,1,1745.522727  
5,1,2367.997642  
5,1,1671.692568  
5,1,121137.378378  
5,1,2694.750000  
5,1,2921.440625  
5,1,91155.125000  
5,1,1911.509146  
5,1,2182.181250  
5,1,3756.236364  
5,1,3208.812500  
5,1,6902.005814  
5,1,62622.750000  
5,1,4359.872549  
5,1,3571.375000  
5,1,2888.128906  
5,1,2320.701220  
5,1,7090.916667  
5,1,2479.815789  
5,1,4353.189189  
5,1,3238.906977  
5,1,12360.869565  
5,1,22846.133929  
5,1,6602.915441  
5,1,45379.129032  
5,1,1501.820946  
5,1,2362.437500  
5,1,3210.282895  
5,1,1993.208333  
5,1,3966.627976  
5,1,23115.503571  
5,1,11863.595000  
5,1,2590.159722  
5,1,5097.843085  
5,1,2919.265625  
5,1,30546.345238  
5,1,2346.552326  
5,1,16482.403571  
5,1,2199.500000  
5,1,3924.953947  
5,1,1600.606383  
5,1,2326.870000  
5,1,2916.632353  
5,1,2510.387931  
5,1,46596.111842  
5,1,2387.622222

5,1,41671.529412  
5,1,44149.806250  
5,1,1780.790323  
5,1,2002.269737  
5,1,15808.697674  
5,1,4043.487500  
5,1,5902.181818  
5,1,1664.729167  
5,1,1908.365854  
5,1,1912.500000  
5,1,4557.812500  
5,1,2322.875000  
5,1,4566.755556  
5,1,5485.002660  
5,1,1603.000000  
5,1,1903.318182  
5,1,12826.427083  
5,1,23041.319853  
5,1,2897.027027  
5,1,3378.125000  
5,1,4541.452381  
5,1,20246.180147  
5,1,10046.861111  
5,1,2444.372222  
5,1,6664.960227  
5,1,9772.139423  
5,1,1913.365854  
5,1,8008.542079  
5,1,12547.331250  
5,1,2606.121711  
5,1,2599.686047  
5,1,123892.320513  
5,1,3325.604651  
5,1,9777.438953  
5,1,13577.375000  
5,1,4016.733333  
5,1,13207.614865  
5,1,2315.450000  
5,1,31449.048780  
5,1,1809.133523  
5,1,2385.280488  
5,1,3477.838542  
5,1,1909.393939  
5,1,18352.705882  
5,1,86031.250000  
5,1,7833.527027  
5,1,49629.666667  
5,1,2140.803571  
5,1,8142.442073  
5,1,2385.262500  
5,1,4000.311111  
5,1,20637.455882  
5,1,13345.571429  
5,1,8119.153302  
5,1,2000.911765  
5,1,161132.283784  
5,1,3175.307692  
5,1,1561.000000  
5,1,2218.088710  
5,1,1975.857143  
5,1,4412.985294  
5,1,2473.877660  
5,1,1620.300000  
5,1,4686.547619  
5,1,60412.540441  
5,1,3835.837766

5,1,1663.060976  
5,1,33141.320000  
5,1,8257.600000  
5,1,2263.645833  
5,1,6329.307692  
5,1,26879.503289  
5,1,5052.518750  
5,1,2599.221154  
5,1,5129.693182  
5,1,24239.144886  
5,1,1568.392857  
5,1,3532.564286  
5,1,2263.110465  
5,1,63720.187500  
5,1,1986.956522  
5,1,16446.634146  
5,1,3895.916667  
5,1,3639.396341  
5,1,13147.055921  
5,1,6080.679487  
5,1,2681.476190  
5,1,1826.602500  
5,1,2569.684211  
5,1,5453.576705  
5,1,4122.562500  
5,1,2202.500000  
5,1,18690.148026  
5,1,7024.246429  
5,1,1534.692308  
5,1,36187.264706  
5,1,4854.365625  
5,1,1775.848404  
5,1,27466.843750  
5,1,2078.272727  
5,1,1726.550000  
5,1,1779.125000  
5,1,2507.000000  
5,1,3291.562500  
5,1,25411.460366  
5,1,28100.768382  
5,1,90524.466216  
5,1,6234.654891  
5,1,106847.331395  
5,1,6902.809375  
5,1,7087.363636  
5,1,11393.592593  
5,1,18356.125000  
5,1,1585.647436  
5,1,1712.878571  
5,1,4323.216837  
5,1,9622.439103  
5,1,23313.153409  
5,1,6345.742188  
5,1,3481.920918  
5,1,12271.648026  
5,1,2804.540698  
5,1,1616.960227  
5,1,4967.317308  
5,1,2322.923077  
5,1,2631.219595  
5,1,18641.083333  
5,1,1569.010135  
5,1,1586.396739  
5,1,3532.479167  
5,1,3918.907738  
5,1,13769.560606

5,1,1858.547872  
5,1,2714.807500  
5,1,2387.882353  
5,1,2349.512821  
5,1,3599.475490  
5,1,1741.176471  
5,1,39782.393750  
5,1,6416.161290  
5,1,36776.875000  
5,1,1605.222222  
5,1,9458.636792  
5,1,7380.229730  
5,1,1846.704545  
5,1,1674.054054  
5,1,1502.409574  
5,1,11323.488636  
5,1,6557.066667  
5,1,2018.200000  
5,1,1547.875000  
5,1,4865.816327  
5,1,3259.775000  
5,1,3689.698529  
5,1,2841.744681  
5,1,3266.750000  
5,1,4105.509615  
5,1,2345.553571  
5,1,1732.093750  
5,1,3786.000000  
5,1,2664.743590  
5,1,4706.459459  
5,1,6609.083333  
5,1,4395.390244  
5,1,1665.573529  
5,1,1594.067568  
5,1,2102.300000  
5,1,2570.916667  
5,1,20706.511628  
5,1,1711.981383  
5,1,2338.416667  
5,1,6613.454545  
5,1,3068.379032  
5,1,3783.893617  
5,1,12078.270833  
5,1,2236.352941  
5,1,2988.742857  
5,1,2167.666667  
5,1,3798.564024  
5,1,1667.102273  
5,1,2024.665698  
5,1,34994.714286  
5,1,7002.170000  
5,1,3923.201923  
5,1,18452.276596  
5,1,4461.392857  
5,1,1618.882353  
5,1,2375.329787  
5,1,1591.656250  
5,1,2054.781250  
5,1,32940.763889  
5,1,13559.666667  
5,1,13923.720000  
5,1,2491.157738  
5,1,2188.697581  
5,1,3205.200000  
5,1,1718.774390  
5,1,1866.500000

5,1,5978.977778  
5,1,21265.305556  
5,1,8416.029412  
5,1,2489.025000  
5,1,2745.282609  
5,1,6162.475610  
5,1,1548.354651  
5,1,4027.370732  
5,1,2325.347561  
5,1,3682.071429  
5,1,6368.334375  
5,1,2330.913043  
5,1,1884.333333  
5,1,12627.172794  
5,1,10753.502451  
5,1,5311.724138  
5,1,10095.711538  
5,1,12038.207317  
5,1,1838.250000  
5,1,1517.792763  
5,1,1550.407143  
5,1,1928.326923  
5,1,1894.839286  
5,1,5609.410000  
5,1,2271.101190  
5,1,115644.125000  
5,1,8028.509615  
5,1,1781.680851  
5,1,4654.755319  
5,1,2446.720588  
5,1,1570.853659  
5,1,32661.109375  
5,1,6874.158854  
5,1,2490.848214  
5,1,5283.645833  
5,1,1764.757353  
5,1,2722.562500  
5,1,45838.384615  
5,1,3239.933333  
5,1,6895.687500  
5,1,3225.648649  
5,1,3833.970395  
5,1,2155.750000  
5,1,1968.228723  
5,1,18176.869681  
5,1,12379.707407  
5,1,12474.158537  
5,1,3646.208333  
5,1,4964.615625  
5,1,4698.439024  
5,1,3125.035714  
5,1,2387.777778  
5,1,27302.013514  
5,1,2402.414062  
5,1,43302.381250  
5,1,2857.323718  
5,1,2269.317308  
5,1,6030.128049  
5,1,2430.687500  
5,1,1917.973214  
5,1,1590.392045  
5,1,1627.734375  
5,1,33254.459459  
5,1,2280.297872  
5,1,84653.411765  
5,1,1500.372340

5,1,1736.881098  
5,1,14387.925595  
5,1,3570.153846  
5,1,50681.496429  
5,1,1667.227273  
5,1,2322.770588  
5,1,5562.111111  
5,1,2699.609375  
5,1,3402.706395  
5,1,6081.621212  
5,1,4414.602273  
5,1,48319.555147  
5,1,2041.610465  
5,1,9459.957031  
5,1,2744.837963  
5,1,4482.919118  
5,1,2398.116071  
5,1,1562.825000  
5,1,6390.301020  
5,1,2442.951923  
5,1,2942.928571  
5,1,2063.880952  
5,1,5898.500000  
5,1,1525.560000  
5,1,13506.260000  
5,1,10432.909091  
5,1,1602.250000  
5,1,7575.375000  
5,1,4301.430147  
5,1,2515.447917  
5,1,6811.573171  
5,1,2080.731250  
5,1,1628.378788  
5,1,2956.573529  
5,1,4214.210526  
5,1,16880.306250  
5,1,2880.467391  
5,1,39659.385714  
5,1,30848.220238  
5,1,2524.042969  
5,1,1860.256579  
5,1,1531.622396  
5,1,13888.137500  
5,1,1540.421569  
5,1,1595.483696  
5,1,4663.223404  
5,1,4392.000000  
5,1,17507.342857  
5,1,2260.835784  
5,1,3001.114286  
5,1,1584.114583  
5,1,11110.679054  
5,1,3364.139706  
5,1,4519.675978  
5,1,1609.200000  
5,1,5435.741071  
5,1,1915.224432  
5,1,4416.143382  
5,1,11195.416667  
5,1,2776.875000  
5,1,4931.607143  
5,1,4798.049479  
5,1,6868.149457  
5,1,6056.977273  
5,1,2556.252551  
5,1,3853.812500

5,1,7124.044118  
5,1,4699.653409  
5,1,2672.350962  
5,1,1552.452381  
5,1,2934.625000  
5,1,2169.812500  
5,1,4594.000000  
5,1,14139.403846  
5,1,155872.545455  
5,1,12763.043478  
5,1,3318.106618  
5,1,4258.198864  
5,1,1608.583333  
5,1,18773.093023  
5,1,1698.131757  
5,1,8971.615385  
5,1,7088.169355  
5,1,3519.375000  
5,1,6840.011628  
5,1,2010.666667  
5,1,2490.796875  
5,1,2844.050000  
5,1,2827.500000  
5,1,1952.684896  
5,1,4769.750000  
5,1,3726.307292  
5,1,5346.429487  
5,1,2067.837209  
5,1,19686.536765  
5,1,8056.000000  
5,1,3889.300000  
5,1,2782.059211  
5,1,1770.818396  
5,1,1581.714286  
5,1,41729.914474  
5,1,1908.796053  
5,1,2329.874332  
5,1,3034.148148  
5,1,1976.348837  
5,1,3270.705357  
5,1,2677.687500  
5,1,5393.662879  
5,1,4260.066667  
5,1,1839.607143  
5,1,2266.717262  
5,1,4126.616279  
5,1,2116.537500  
5,1,1791.107143  
5,1,3212.531250  
5,1,1946.926282  
5,1,9336.995536  
5,1,103271.173913  
5,1,2297.875000  
5,1,2108.200000  
5,1,10071.670139  
5,1,3240.920455  
5,1,5391.398649  
5,1,2694.596774  
5,1,12209.577206  
5,1,33313.388158  
5,1,2837.743902  
5,1,3554.351744  
5,1,2721.941176  
5,1,20818.437500  
5,1,2857.632353  
5,1,4750.833333

5,1,1645.029070  
5,1,1711.603448  
5,1,4075.250000  
5,1,1626.179348  
5,1,1619.870000  
5,1,57574.617424  
5,1,1787.107143  
5,1,2876.740854  
5,1,2899.470588  
5,1,2165.114286  
5,1,1772.291667  
5,1,9581.363636  
5,1,8933.203125  
5,1,2688.135638  
5,1,7523.603774  
5,1,2686.914773  
5,1,1922.635135  
5,1,2088.683453  
5,1,4327.564024  
5,1,5259.015957  
5,1,2588.237500  
5,1,4942.494186  
5,1,5179.250000  
5,1,1803.144231  
5,1,48052.787500  
5,1,1875.925000  
5,1,2996.612179  
5,1,14175.835938  
5,1,8291.402174  
5,1,58707.175676  
5,1,1687.292683  
5,1,2056.487805  
5,1,2242.942308  
5,1,1558.576923  
5,1,4046.997340  
5,1,2713.022727  
5,1,3040.966667  
5,1,5379.809524  
5,1,53671.312500  
5,1,1671.957447  
5,1,7293.847826  
5,1,2562.964844  
5,1,3449.645349  
5,1,4394.696429  
5,1,6453.539773  
5,1,1587.503472  
5,1,21830.684211  
5,1,5244.355978  
5,1,2276.487179  
5,1,1519.986111  
5,1,2362.479167  
5,1,10064.985577  
5,1,2212.930233  
5,1,3179.653409  
5,1,8593.459459  
5,1,2909.159091  
5,1,91486.516129  
5,1,6466.717391  
5,1,1673.963415  
5,1,11835.567935  
5,1,7657.388298  
5,1,13647.800000  
5,1,195631.302326  
5,1,1829.528125  
5,1,6045.408854  
5,1,7263.860294

5,1,4340.552326  
5,1,9908.119792  
5,1,9571.640909  
5,1,2698.163462  
5,1,2748.406977  
5,1,4728.891304  
5,1,21384.064516  
5,1,1723.564024  
5,1,9341.582317  
5,1,3063.920732  
5,1,7155.530303  
5,1,1555.000000  
5,1,43196.250000  
5,1,10203.440104  
5,1,3075.656250  
5,1,24122.685714  
5,1,3468.794872  
5,1,33882.171429  
5,1,10941.806034  
5,1,3230.833333  
5,1,2910.345109  
5,1,2943.750000  
5,1,4764.478261  
5,1,1638.753472  
5,1,1789.621622  
5,1,1507.750000  
5,1,2167.712500  
5,1,3446.200000  
5,1,10106.387755  
5,1,3896.375000  
5,1,1949.453488  
5,1,1947.000000  
5,1,44363.808824  
5,1,18498.134146  
5,1,6391.150000  
5,1,33717.513514  
5,1,4048.339844  
5,1,1523.158163  
5,1,1666.789474  
5,1,1913.797297  
5,1,5973.635135  
5,1,89404.705882  
5,1,5704.342857  
5,1,41773.759146  
5,1,3546.303571  
5,1,3534.424107  
5,1,2735.685976  
5,1,8375.963415  
5,1,2698.041667  
5,1,11731.984375  
5,1,1796.750000  
5,1,7912.638514  
5,1,2797.911765  
5,1,4902.131098  
5,1,1779.689103  
5,1,3569.636364  
5,1,8467.414474  
5,1,2341.557927  
5,1,3547.616667  
5,1,6096.530303  
5,1,11966.515625  
5,1,3704.500000  
5,1,4208.347561  
5,1,1741.625000  
5,1,2856.983696  
5,1,5201.396226

5,1,3670.791667  
5,1,3240.272727  
5,1,2795.503472  
5,1,2139.911765  
5,1,44343.190476  
5,1,6527.692708  
5,1,15001.125000  
5,1,11797.505682  
5,1,1613.625000  
5,1,1778.199324  
5,1,24958.419872  
5,1,25672.848485  
5,1,2198.155556  
5,1,1755.500000  
5,1,8097.875000  
5,1,4725.714286  
5,1,2311.889535  
5,1,4914.369318  
5,1,25576.057143  
5,1,3883.061170  
5,1,3672.060606  
5,1,1591.500000  
5,1,4322.208333  
5,1,2366.333333  
5,1,2416.978723  
5,1,2592.250000  
5,1,2189.406250  
5,1,5842.175781  
5,1,4309.625000  
5,1,4634.779412  
5,1,28281.607143  
5,1,2071.875000  
5,1,22945.220588  
5,1,12155.243243  
5,1,4348.205882  
5,1,99085.406250  
5,1,2839.966463  
5,1,3014.688889  
5,1,13307.260870  
5,1,2217.875000  
5,1,3856.616667  
5,1,1543.403646  
5,1,2761.341216  
5,1,23135.000000  
5,1,1762.657068  
5,1,1829.878788  
5,1,1804.744898  
5,1,22155.250000  
5,1,6605.782500  
5,1,2231.103659  
5,1,4260.344828  
5,1,1602.825000  
5,1,2710.000000  
5,1,2004.339286  
5,1,26262.364583  
5,1,7227.215625  
5,1,5739.670213  
5,1,3518.292614  
5,1,13910.868421  
5,1,2511.587838  
5,1,2417.213235  
5,1,3942.062500  
5,1,2060.925676  
5,1,3535.886364  
5,1,5362.465686  
5,1,18402.968023

5,1,2547.301630  
5,1,3145.578947  
5,1,61181.394886  
5,1,12121.875000  
5,1,84965.540741  
5,1,3018.342857  
5,1,2399.565476  
5,1,1731.697674  
5,1,10038.521277  
5,1,9856.562500  
5,1,11083.625000  
5,1,5164.250000  
5,1,7164.340278  
5,1,1517.148256  
5,1,25996.500000  
5,1,1641.725610  
5,1,14380.597222  
5,1,2248.855556  
5,1,1922.475610  
5,1,15985.188953  
5,1,2458.161290  
5,1,2487.807692  
5,1,23757.909091  
5,1,4611.691964  
5,1,4487.166667  
5,1,2664.937500  
5,1,8107.750000  
5,1,2550.346354  
5,1,2077.232558  
5,1,4594.635135  
5,1,7461.438889  
5,1,1677.643617  
5,1,1518.228261  
5,1,1944.444444  
5,1,6191.436170  
5,1,13308.428571  
5,1,2339.843750  
5,1,74092.625000  
5,1,1546.045455  
5,1,2305.246622  
5,1,1547.515152  
5,1,78485.930556  
5,1,3075.333333  
5,1,3945.104430  
5,1,6660.178571  
5,1,11989.065217  
5,1,1566.107143  
5,1,1560.550000  
5,1,71108.315789  
5,1,5224.396875  
5,1,4727.964286  
5,1,2469.687500  
5,1,4013.848837  
5,1,1872.538462  
5,1,3333.896739  
5,1,2662.947115  
5,1,40225.686047  
5,1,70385.055000  
5,1,1604.412791  
5,1,6598.176471  
5,1,25491.176471  
5,1,2431.097561  
5,1,13321.826923  
5,1,43389.437500  
5,1,2420.244898  
5,1,2340.290698

5,1,27343.437500  
5,1,2751.362069  
5,1,2855.116667  
5,1,2939.105263  
5,1,7337.743304  
5,1,2056.611111  
5,1,1640.540541  
5,1,40640.710227  
5,1,4606.306250  
5,1,4504.688889  
5,1,3019.782609  
5,1,1881.875000  
5,1,2975.642857  
5,1,2456.228571  
5,1,1809.147727  
5,1,3703.534091  
5,1,2804.281250  
5,1,2100.200000  
5,1,10354.002976  
5,1,2170.875000  
5,1,1764.143617  
5,1,1633.510638  
5,1,2687.250000  
5,1,3142.974490  
5,1,5580.250000  
5,1,9428.222826  
5,1,1643.409091  
5,1,1609.755556  
5,1,113173.823980  
5,1,5124.291667  
5,1,2789.202128  
5,1,4129.563953  
5,1,1653.648026  
5,1,2031.103659  
5,1,1789.910326  
5,1,124422.161765  
5,1,4796.524390  
5,1,136203.948718  
5,1,1866.090909  
5,1,3379.125000  
5,1,2118.480769  
5,1,2407.252551  
5,1,2383.546875  
5,1,191192.133333  
5,1,1863.521341  
5,1,40579.125000  
5,1,6722.191406  
5,1,2854.488889  
5,1,1987.791667  
5,1,2702.784375  
5,1,3626.524590  
5,1,4980.811429  
5,1,20828.151316  
5,1,1599.198953  
5,1,3889.912791  
5,1,1571.337209  
5,1,2192.666667  
5,1,6873.468085  
5,1,169712.221591  
5,1,2344.843023  
5,1,2451.736111  
5,1,2978.145833  
5,1,5839.620690  
5,1,2940.184783  
5,1,5293.375000  
5,1,4072.850000

5,1,7355.674419  
5,1,66017.276316  
5,1,13032.347826  
5,1,9173.351064  
5,1,2218.071429  
5,1,2748.000000  
5,1,1536.333333  
5,1,3136.418605  
5,1,14643.180556  
5,1,7538.669118  
5,1,4251.537791  
5,1,22310.100694  
5,1,4072.290698  
5,1,3143.451087  
5,1,2198.986111  
5,1,1507.180556  
5,1,8708.294118  
5,1,2626.305233  
5,1,1554.997093  
5,1,1664.656250  
5,1,7131.531250  
5,1,1646.307692  
5,1,7705.714286  
5,1,3508.241848  
5,1,2738.882353  
5,1,96089.076389  
5,1,3174.859375  
5,1,7300.935484  
5,1,1809.616279  
5,1,1801.200000  
5,1,4582.934211  
5,1,2435.904040  
5,1,3530.597222  
5,1,2592.830357  
5,1,3898.735294  
5,1,3150.032051  
5,1,2955.541667  
5,1,1631.586806  
5,1,1948.551020  
5,1,1962.531250  
5,1,1951.758721  
5,1,29663.708333  
5,1,3608.600575  
5,1,7694.310526  
5,1,4087.943182  
5,1,6227.000000  
5,1,23449.441860  
5,1,3189.367188  
5,1,2680.375000  
5,1,1703.601351  
5,1,2068.817073  
5,1,2552.106707  
5,1,7745.004032  
5,1,10195.695946  
5,1,10688.009615  
5,1,9398.839286  
5,1,3004.684524  
5,1,3103.361702  
5,1,8300.031250  
5,1,34196.805556  
5,1,3496.250000  
5,1,5036.250000  
5,1,2525.679688  
5,1,1638.448276  
5,1,3785.642857  
5,1,2238.586111

5,1,1687.378049  
5,1,7156.264881  
5,1,1669.576087  
5,1,35145.300000  
5,1,2173.000000  
5,1,1513.545455  
5,1,1647.222222  
5,1,2665.408537  
5,1,2903.851562  
5,1,3176.567308  
5,1,2037.642857  
5,1,3251.816489  
5,1,2438.814103  
5,1,2199.912162  
5,1,8929.671196  
5,1,2794.534574  
5,1,2630.451389  
5,1,2257.818452  
5,1,1991.827586  
5,1,11524.791667  
5,1,6194.698718  
5,1,1573.667683  
5,1,3922.453125  
5,1,49678.958333  
5,1,2622.166667  
5,1,39792.307432  
5,1,7776.002551  
5,1,28895.041667  
5,1,48157.512931  
5,1,1917.780488  
5,1,2394.247549  
5,1,12249.428571  
5,1,2900.497449  
5,1,2109.104167  
5,1,5171.064103  
5,1,2096.335106  
5,1,3267.119318  
5,1,6389.682927  
5,1,45203.578571  
5,1,2393.437500  
5,1,4584.829545  
5,1,4270.346591  
5,1,28043.073864  
5,1,4803.600000  
5,1,85695.073370  
5,1,17772.698529  
5,1,8039.225694  
5,1,2569.565476  
5,1,1709.412234  
5,1,1668.508523  
5,1,2570.516393  
5,1,122910.734375  
5,1,75013.016667  
5,1,3867.656250  
5,1,1914.622222  
5,1,4567.053191  
5,1,13309.881356  
5,1,5366.307692  
5,1,1710.683333  
5,1,4016.375000  
5,1,2479.723404  
5,1,3708.145833  
5,1,2250.785256  
5,1,7006.658537  
5,1,27491.796875  
5,1,7730.423077

5,1,1744.611111  
5,1,2232.771277  
5,1,1706.331250  
5,1,2288.959184  
5,1,1504.113636  
5,1,1817.133523  
5,1,1921.283784  
5,1,3367.944444  
5,1,11222.737903  
5,1,89038.038462  
5,1,2165.354167  
5,1,3167.182692  
5,1,1713.886364  
5,1,6741.110465  
5,1,14385.083333  
5,1,1782.333333  
5,1,4387.220000  
5,1,1549.583333  
5,1,85972.333333  
5,1,3334.511628  
5,1,3490.973684  
5,1,30374.763889  
5,1,2694.462121  
5,1,2500.666667  
5,1,1587.957447  
5,1,14994.421429  
5,1,28510.500000  
5,1,5073.333333  
5,1,6706.593750  
5,1,33596.743056  
5,1,3349.793478  
5,1,1934.832386  
5,1,3339.531863  
5,1,4637.285714  
5,1,61763.090278  
5,1,32815.042763  
5,1,1728.290698  
5,1,2163.566667  
5,1,1674.559211  
5,1,2765.394531  
5,1,2435.471154  
5,1,1710.894444  
5,1,2630.788462  
5,1,2674.920455  
5,1,1552.487500  
5,1,2038.513889  
5,1,2755.835526  
5,1,14345.295455  
5,1,1910.323980  
5,1,2453.071809  
5,1,99547.953488  
5,1,2209.732955  
5,1,3208.432927  
5,1,10993.226994  
5,1,14495.440299  
5,1,62214.682432  
5,1,9111.625000  
5,1,2794.390244  
5,1,3618.406250  
5,1,8513.428571  
5,1,1966.125000  
5,1,3114.238971  
5,1,16919.192857  
5,1,2325.065217  
5,1,43765.939024  
5,1,4136.576220

5,1,3653.052326  
5,1,5077.920455  
5,1,2266.500000  
5,1,1786.066860  
5,1,6340.340278  
5,1,2645.720000  
5,1,2444.387006  
5,1,1995.440341  
5,1,2672.238372  
5,1,1638.950000  
5,1,4213.750000  
5,1,4346.076220  
5,1,4428.625000  
5,1,2713.912500  
5,1,3293.313953  
5,1,14308.433511  
5,1,3973.858333  
5,1,1569.804878  
5,1,11988.222656  
5,1,1630.697674  
5,1,2410.970000  
5,1,2292.196023  
5,1,2894.250000  
5,1,3089.464286  
5,1,2728.558824  
5,1,28180.687500  
5,1,3507.931818  
5,1,85928.422297  
5,1,2086.923077  
5,1,6361.250000  
5,1,4783.678571  
5,1,22465.636364  
5,1,2956.348837  
5,1,20336.700000  
5,1,13213.443182  
5,1,66877.375000  
5,1,2727.259868  
5,1,84335.713415  
5,1,22840.377976  
5,1,2034.500000  
5,1,1633.750000  
5,1,1977.887195  
5,1,1654.027439  
5,1,3080.069767  
5,1,14859.168478  
5,1,3142.403846  
5,1,21499.720238  
5,1,5126.250000  
5,1,4650.592391  
5,1,2471.037500  
5,1,4342.028061  
5,1,31236.500000  
5,1,5002.017442  
5,1,7663.687500  
5,1,5412.878788  
5,1,2829.883721  
5,1,3172.559524  
5,1,3540.333333  
5,1,2931.048780  
5,1,4944.804348  
5,1,2038.204545  
5,1,1710.835227  
5,1,2783.625000  
5,1,31441.250000  
5,1,2184.135870  
5,1,16009.237903

5,1,2446.020833  
5,1,2389.500000  
5,1,2163.050000  
5,1,1761.841463  
5,1,1505.188889  
5,1,18639.450000  
5,1,3309.772727  
5,1,5675.026163  
5,1,37195.132812  
5,1,10662.113971  
5,1,1946.144578  
5,1,40289.806250  
5,1,15998.412500  
5,1,4273.836735  
5,1,2090.956522  
5,1,1729.441667  
5,1,2004.479592  
5,1,2299.581395  
5,1,1615.497093  
5,1,2179.785714  
5,1,1830.944444  
5,1,13983.875000  
5,1,1785.466667  
5,1,7160.869898  
5,1,2924.563725  
5,1,6422.730769  
5,1,13324.333333  
5,1,3055.275000  
5,1,1693.562500  
5,1,3617.567073  
5,1,24263.148810  
5,1,1670.588235  
5,1,1612.062500  
5,1,1977.247449  
5,1,74998.371875  
5,1,3893.800000  
5,1,32741.235294  
5,1,1657.317935  
5,1,2251.921875  
5,1,1727.500000  
5,1,7191.846774  
5,1,3734.387755  
5,1,3875.959302  
5,1,1821.886364  
5,1,1682.437500  
5,1,3800.625000  
5,1,1732.528846  
5,1,3784.928571  
5,1,39078.347973  
5,1,5213.090909  
5,1,4910.295213  
5,1,2932.851744  
5,1,2790.056995  
5,1,9855.333333  
5,1,53813.932692  
5,1,1607.342105  
5,1,1694.270833  
5,1,3723.159884  
5,1,1958.343750  
5,1,34209.119186  
5,1,15763.422297  
5,1,9829.122093  
5,1,8016.055921  
5,1,5195.402439  
5,1,23414.067073  
5,1,2627.483696

5,1,10985.381579  
5,1,6652.781250  
5,1,2325.160156  
5,1,13313.093750  
5,1,1995.642857  
5,1,4971.057692  
5,1,3020.461957  
5,1,4958.649457  
5,1,21252.696429  
5,1,2430.410714  
5,1,4521.500000  
5,1,1835.571429  
5,1,1767.506757  
5,1,7857.584906  
5,1,3445.289634  
5,1,3471.500000  
5,1,2174.681818  
5,1,6164.206818  
5,1,1685.278846  
5,1,2595.916667  
5,1,38058.363095  
5,1,1509.000000  
5,1,29815.054688  
5,1,2017.700000  
5,1,2633.354167  
5,1,1539.004032  
5,1,2494.787234  
5,1,1945.250000  
5,1,2117.804878  
5,1,4346.415698  
5,1,3060.119048  
5,1,2162.497396  
5,1,4034.225490  
5,1,2664.750000  
5,1,1884.891447  
5,1,23968.214286  
5,1,12366.715426  
5,1,9958.180233  
5,1,3457.390244  
5,1,3142.407143  
5,1,17984.853448  
5,1,2101.666667  
5,1,48905.200000  
5,1,29838.878289  
5,1,3074.800000  
5,1,1917.197917  
5,1,4994.591837  
5,1,5728.240132  
5,1,2272.134615  
5,1,2629.943182  
5,1,1643.497340  
5,1,3755.019022  
5,1,3223.408088  
5,1,3181.696203  
5,1,3529.731707  
5,1,10655.480769  
5,1,38989.142045  
5,1,4637.586310  
5,1,1997.523256  
5,1,3633.458333  
5,1,11822.423387  
5,1,3321.872222  
5,1,2099.446429  
5,1,1905.272436  
5,1,1684.681818  
5,1,1690.030405

5,1,3727.680000  
5,1,58539.885714  
5,1,2161.939516  
5,1,2339.763158  
5,1,4500.875000  
5,1,18017.767857  
5,1,31600.891129  
5,1,2980.062500  
5,1,4683.812500  
5,1,11256.070312  
5,1,98234.120690  
5,1,5435.266129  
5,1,1513.500000  
5,1,45231.181818  
5,1,1559.062500  
5,1,2721.083333  
5,1,13243.267857  
5,1,3739.332447  
5,1,2604.781250  
5,1,8721.877049  
5,1,6030.615854  
5,1,4504.581522  
5,1,51333.250000  
5,1,1855.798611  
5,1,8429.033333  
5,1,3694.581522  
5,1,6516.750000  
5,1,22606.057870  
5,1,7696.804688  
5,1,1610.419118  
5,1,6247.062500  
5,1,1930.139286  
5,1,4941.660714  
5,1,9135.830556  
5,1,84619.290541  
5,1,2332.181818  
5,1,5776.551136  
5,1,2616.652174  
5,1,12120.696023  
5,1,7569.806818  
5,1,5741.977500  
5,1,27783.245283  
5,1,1714.312500  
5,1,2384.904412  
5,1,4653.687500  
5,1,4060.016304  
5,1,4940.188679  
5,1,5576.066327  
5,1,3388.883721  
5,1,4330.117021  
5,1,1855.867647  
5,1,1614.411765  
5,1,47009.513514  
5,1,1986.884146  
5,1,3863.423077  
5,1,7284.065789  
5,1,1613.974359  
5,1,3164.590426  
5,1,4194.261307  
5,1,3374.972222  
5,1,2634.636364  
5,1,1895.005319  
5,1,3282.982955  
5,1,12193.392442  
5,1,1688.158854  
5,1,6515.900000

5,1,6485.235294  
5,1,3250.157895  
5,1,8201.300000  
5,1,1645.595588  
5,1,38102.522059  
5,1,9732.073529  
5,1,53088.144886  
5,1,2921.209184  
5,1,4584.827586  
5,1,4304.702128  
5,1,15925.333333  
5,1,104983.981481  
5,1,2385.008197  
5,1,1640.070312  
5,1,1501.788462  
5,1,17188.677778  
5,1,2803.304348  
5,1,2012.861702  
5,1,3712.997283  
5,1,1975.166667  
5,1,37075.301471  
5,1,1886.875000  
5,1,2093.722656  
5,1,9451.078947  
5,1,2989.788462  
5,1,13027.113208  
5,1,2427.343750  
5,1,2226.436047  
5,1,12699.136364  
5,1,3813.755814  
5,1,9192.258333  
5,1,2604.433036  
5,1,1587.414474  
5,1,2417.995098  
5,1,3475.423469  
5,1,4860.834459  
5,1,26805.868750  
5,1,2196.133333  
5,1,3115.097561  
5,1,2558.021277  
5,1,3507.980769  
5,1,2526.631579  
5,1,4305.972222  
5,1,24447.980769  
5,1,1849.781250  
5,1,20831.970930  
5,1,2472.851190  
5,1,1608.000000  
5,1,2795.066667  
5,1,2105.743750  
5,1,3496.063830  
5,1,2780.505208  
5,1,6367.475000  
5,1,16509.359043  
5,1,11862.375000  
5,1,26272.419643  
5,1,9249.337838  
5,1,18418.105263  
5,1,3082.464286  
5,1,4983.718750  
5,1,20410.107955  
5,1,1741.174051  
5,1,5266.078125  
5,1,4388.571429  
5,1,21972.280488  
5,1,23578.317073

5,1,3400.044118  
5,1,3063.571429  
5,1,1593.628289  
5,1,2905.653846  
5,1,2281.659091  
5,1,2319.166667  
5,1,1642.284884  
5,1,3269.619048  
5,1,16589.730114  
5,1,4011.730769  
5,1,11034.886792  
5,1,18068.448718  
5,1,6444.966667  
5,1,2089.895833  
5,1,1614.517857  
5,1,41885.771341  
5,1,3231.000000  
5,1,7702.160326  
5,1,8437.647059  
5,1,1734.755814  
5,1,3111.094595  
5,1,3887.196429  
5,1,6225.950000  
5,1,3757.093750  
5,1,1778.088068  
5,1,3203.334459  
5,1,2226.212766  
5,1,8559.779762  
5,1,2068.382979  
5,1,1628.085106  
5,1,24742.932692  
5,1,1558.282051  
5,1,2455.000000  
5,1,2773.861111  
5,1,1965.099490  
5,1,15687.174419  
5,1,10602.347727  
5,1,4079.134228  
5,1,60402.056604  
5,1,3892.164062  
5,1,3263.965625  
5,1,12268.155172  
5,1,103213.133333  
5,1,1597.851351  
5,1,3068.436170  
5,1,16144.937500  
5,1,1539.145833  
5,1,2010.942308  
5,1,2483.800000  
5,1,2079.650568  
5,1,70615.102564  
5,1,4260.250000  
5,1,6905.027439  
5,1,2072.019022  
5,1,1927.356383  
5,1,2276.508721  
5,1,6159.431280  
5,1,12916.310976  
5,1,2264.095930  
5,1,59614.990000  
5,1,2598.973404  
5,1,21723.960938  
5,1,31638.545455  
5,1,2094.956522  
5,1,2794.807692  
5,1,2326.440000

5,1,1559.336957  
5,1,1938.333333  
5,1,7543.468750  
5,1,8303.567073  
5,1,3037.567857  
5,1,2944.800000  
5,1,128635.138636  
5,1,2869.389831  
5,1,1891.869792  
5,1,2000.074468  
5,1,4090.179487  
5,1,1548.933333  
5,1,3171.673077  
5,1,2032.835526  
5,1,5265.932432  
5,1,15420.401163  
5,1,5517.852761  
5,1,5301.996795  
5,1,5926.375000  
5,1,2332.500000  
5,1,2162.725806  
5,1,59063.267442  
5,1,1769.762195  
5,1,32870.615854  
5,1,6416.644531  
5,1,14083.466667  
5,1,1574.232759  
5,1,3223.285714  
5,1,2859.698529  
5,1,3516.558333  
5,1,7471.595745  
5,1,33747.000000  
5,1,1516.820513  
5,1,28798.957143  
5,1,2276.787879  
5,1,2316.760000  
5,1,12144.599265  
5,1,2021.309028  
5,1,2526.171875  
5,1,2604.481250  
5,1,4333.758929  
5,1,1516.162234  
5,1,23677.711538  
5,1,2237.032895  
5,1,23028.402439  
5,1,1724.157895  
5,1,1966.494444  
5,1,27471.095000  
5,1,4658.340517  
5,1,3674.618421  
5,1,1525.473684  
5,1,2090.020000  
5,1,1707.185811  
5,1,3076.171512  
5,1,40336.454545  
5,1,10764.718750  
5,1,2183.712500  
5,1,4859.972222  
5,1,2018.820312  
5,1,3288.658333  
5,1,16815.266447  
5,1,2792.310185  
5,1,1499.070946  
5,1,3710.869231  
5,1,9299.375000  
5,1,2390.544444

5,1,1948.914634  
5,1,3750.000000  
5,1,2124.400000  
5,1,5008.839286  
5,1,1716.559524  
5,1,2056.457386  
5,1,33942.579545  
5,1,4809.585000  
5,1,56381.375000  
5,1,1856.343750  
5,1,10966.411765  
5,1,80116.742647  
5,1,22696.510417  
5,1,2155.796053  
5,1,3664.869565  
5,1,3006.864286  
5,1,2549.572917  
5,1,2644.750000  
5,1,3905.224490  
5,1,3753.341463  
5,1,5148.550000  
5,1,4344.153846  
5,1,2567.647059  
5,1,4100.875000  
5,1,7394.540179  
5,1,2189.160326  
5,1,1557.130000  
5,1,2376.600000  
5,1,1584.009375  
5,1,2822.671053  
5,1,1545.589674  
5,1,9569.068182  
5,1,1981.062500  
5,1,2451.000000  
5,1,2710.497283  
5,1,1701.422297  
5,1,99296.664474  
5,1,12187.058824  
5,1,5526.447674  
5,1,137799.819444  
5,1,2100.188953  
5,1,2976.384615  
5,1,11627.391509  
5,1,1548.039634  
5,1,3582.540541  
5,1,2208.750000  
5,1,1637.911290  
5,1,1580.668367  
5,1,8820.802326  
5,1,2035.459459  
5,1,25472.435897  
5,1,2168.267857  
5,1,7837.685096  
5,1,2445.334459  
5,1,2756.342391  
5,1,1982.951087  
5,1,4210.762500  
5,1,1783.509615  
5,1,1518.260638  
5,1,100079.486111  
5,1,2129.543919  
5,1,2412.500000  
5,1,9390.830128  
5,1,6402.801471  
5,1,3982.971591  
5,1,105576.270270

5,1,9182.875000  
5,1,3829.810000  
5,1,2988.156977  
5,1,1517.482143  
5,1,8151.320312  
5,1,2036.425532  
5,1,4345.116848  
5,1,2662.056604  
5,1,3772.817708  
5,1,1928.563830  
5,1,2772.692568  
5,1,3243.483553  
5,1,29327.078947  
5,1,3943.028409  
5,1,1846.396875  
5,1,61645.477564  
5,1,2156.586957  
5,1,2414.479167  
5,1,2418.428125  
5,1,4069.972973  
5,1,1712.800000  
5,1,4023.977778  
5,1,1658.068182  
5,1,45515.903846  
5,1,1525.812500  
5,1,3722.809524  
5,1,2060.285714  
5,1,5532.106383  
5,1,1606.207317  
5,1,5100.964286  
5,1,15019.386719  
5,1,1532.250000  
5,1,1670.730114  
5,1,1726.550000  
5,1,4877.693182  
5,1,2482.565476  
5,1,1760.318878  
5,1,20221.043478  
5,1,1891.821429  
5,1,1620.218750  
5,1,2638.024390  
5,1,4126.313953  
5,1,6186.459459  
5,1,22734.750000  
5,1,1882.979167  
5,1,68475.940789  
5,1,1672.390000  
5,1,1610.402439  
5,1,2768.297619  
5,1,6265.609375  
5,1,2106.000000  
5,1,1587.625000  
5,1,11533.880952  
5,1,1594.744186  
5,1,1964.483974  
5,1,1849.562500  
5,1,5904.926829  
5,1,1738.824405  
5,1,2129.658537  
5,1,2007.333333  
5,1,1812.223958  
5,1,14434.552778  
5,1,3836.125000  
5,1,2374.187500  
5,1,1764.271739  
5,1,16218.067568

5,1,2127.267045  
5,1,48059.537879  
5,1,2464.297872  
5,1,1904.854651  
5,1,1537.146341  
5,1,1530.310976  
5,1,1578.522059  
5,1,3563.102564  
5,1,4016.530612  
5,1,22917.558511  
5,1,3259.977778  
5,1,32642.486842  
5,1,9514.021739  
5,1,1706.613636  
5,1,5457.371795  
5,1,3119.534091  
5,1,8096.605469  
5,1,1913.608696  
5,1,2510.750000  
5,1,2088.690789  
5,1,10787.687500  
5,1,9037.316667  
5,1,1523.826316  
5,1,1715.727273  
5,1,3086.763158  
5,1,2475.755814  
5,1,4300.779070  
5,1,1966.723214  
5,1,2661.858696  
5,1,20865.000000  
5,1,2278.521739  
5,1,3100.437500  
5,1,2675.013393  
5,1,15788.841463  
5,1,1975.756098  
5,1,2949.410714  
5,1,3596.701087  
5,1,4548.319149  
5,1,113836.310484  
5,1,2300.955556  
5,1,5851.375000  
5,1,21949.358696  
5,1,2914.890625  
5,1,2256.900000  
5,1,2670.375000  
5,1,4986.562500  
5,1,2140.750000  
5,1,2625.972067  
5,1,2800.441964  
5,1,45683.320312  
5,1,3278.261364  
5,1,2189.552083  
5,1,2131.768293  
5,1,2573.578125  
5,1,1506.255682  
5,1,3648.800000  
5,1,2044.371094  
5,1,1555.517045  
5,1,1562.210714  
5,1,2850.500000  
5,1,64872.868902  
5,1,1576.944444  
5,1,3216.256757  
5,1,60347.281250  
5,1,1753.633721  
5,1,1632.526786

5,1,53300.133929  
5,1,3527.500000  
5,1,2125.911585  
5,1,40321.453125  
5,1,19864.843750  
5,1,9277.051136  
5,1,3344.189189  
5,1,4764.836735  
5,1,2364.416667  
5,1,5544.833333  
5,1,2084.673780  
5,1,2788.222826  
5,1,7510.232558  
5,1,6112.557292  
5,1,1946.905488  
5,1,3226.129808  
5,1,1562.139535  
5,1,2025.722973  
5,1,2066.317073  
5,1,1614.513158  
5,1,3001.586592  
5,1,1624.364865  
5,1,5807.190217  
5,1,25330.592593  
5,1,1700.901316  
5,1,17808.343750  
5,1,1624.406977  
5,1,4084.878049  
5,1,3030.444767  
5,1,1854.569149  
5,1,2532.151316  
5,1,2838.944444  
5,1,2372.965426  
5,1,141226.496711  
5,1,3117.916667  
5,1,4254.093750  
5,1,4524.891129  
5,1,3489.186047  
5,1,4591.101064  
5,1,2458.950000  
5,1,1665.588542  
5,1,13785.000000  
5,1,5147.378676  
5,1,1684.361702  
5,1,1813.191489  
5,1,2258.237500  
5,1,32286.297297  
5,1,2560.000000  
5,1,2534.666667  
5,1,10398.000000  
5,1,3766.761628  
5,1,3337.461957  
5,1,6028.257653  
5,1,1724.410714  
5,1,8180.302326  
5,1,134679.800000  
5,1,13387.921053  
5,1,1776.909091  
5,1,2667.625000  
5,1,5300.989583  
5,1,40852.387255  
5,1,13433.023438  
5,1,1583.913462  
5,1,26636.179487  
5,1,1854.692308  
5,1,7146.847826

5,1,3065.807692  
5,1,39718.634615  
5,1,101917.500000  
5,1,2205.429054  
5,1,2639.546429  
5,1,2013.604651  
5,1,1677.406915  
5,1,4998.171875  
5,1,1697.060606  
5,1,4433.031250  
5,1,4526.210526  
5,1,2568.476190  
5,1,1778.800000  
5,1,2636.812500  
5,1,2352.625000  
5,1,3712.253472  
5,1,2455.214286  
5,1,2429.558824  
5,1,1970.403846  
5,1,2832.000000  
5,1,13061.360465  
5,1,1539.170213  
5,1,63572.513514  
5,1,41618.785714  
5,1,3614.930556  
5,1,2695.216463  
5,1,3257.789773  
5,1,23692.993421  
5,1,1682.309211  
5,1,3393.010417  
5,1,4876.227273  
5,1,38718.079268  
5,1,2174.783537  
5,1,43104.563953  
5,1,4492.872396  
5,1,2162.200000  
5,1,2402.378788  
5,1,2449.478261  
5,1,1773.660714  
5,1,5361.166667  
5,1,1741.344595  
5,1,1649.579268  
5,1,1671.135870  
5,1,4514.060714  
5,1,3672.813953  
5,1,1554.315104  
5,1,18570.143750  
5,1,3587.250000  
5,1,14334.200000  
5,1,2438.550000  
5,1,3474.819767  
5,1,2378.750000  
5,1,4960.375000  
5,1,1778.323529  
5,1,3081.500000  
5,1,2066.633333  
5,1,17823.555556  
5,1,30814.854167  
5,1,39506.723214  
5,1,1734.897959  
5,1,85216.240385  
5,1,4350.343085  
5,1,28446.533163  
5,1,2015.117647  
5,1,1993.891892  
5,1,1621.803191

5,1,1989.691176  
5,1,18009.000000  
5,1,174997.646739  
5,1,1688.804094  
5,1,10081.496622  
5,1,5519.057927  
5,1,2584.473684  
5,1,25840.062500  
5,1,2750.864796  
5,1,3129.571429  
5,1,2789.914894  
5,1,2185.153846  
5,1,3122.678571  
5,1,2071.657738  
5,1,1582.921053  
5,1,5170.000000  
5,1,3526.750000  
5,1,4866.055556  
5,1,2872.025000  
5,1,2944.807692  
5,1,1785.060976  
5,1,5952.958333  
5,1,3626.625000  
5,1,15192.042453  
5,1,47804.439189  
5,1,6837.465909  
5,1,2558.010870  
5,1,3083.625000  
5,1,4734.243902  
5,1,16716.517241  
5,1,1883.428571  
5,1,2991.675676  
5,1,2798.000000  
5,1,2730.068966  
5,1,2143.030556  
5,1,2644.677632  
5,1,3084.139535  
5,1,3324.132979  
5,1,1687.321429  
5,1,1986.859375  
5,1,2424.905405  
5,1,3925.396341  
5,1,25347.073529  
5,1,14857.218750  
5,1,3923.076087  
5,1,1955.029762  
5,1,8249.500000  
5,1,1501.854167  
5,1,8660.704082  
5,1,1833.715625  
5,1,6075.581395  
5,1,1588.523256  
5,1,5884.142857  
5,1,14494.727273  
5,1,5620.276786  
5,1,3242.159722  
5,1,2117.833333  
5,1,1569.986842  
5,1,3496.279891  
5,1,1843.980263  
5,1,7898.562500  
5,1,32755.717857  
5,1,2268.103261  
5,1,1998.545455  
5,1,3912.060811  
5,1,4055.150000

5,1,5219.071809  
5,1,2914.809524  
5,1,1741.209302  
5,1,3764.908088  
5,1,1681.942308  
5,1,3035.578947  
5,1,12983.375000  
5,1,5782.187500  
5,1,1560.662500  
5,1,49938.548611  
5,1,13358.625000  
5,1,3424.000000  
5,1,1851.510714  
5,1,4299.533333  
5,1,7920.488764  
5,1,1990.783854  
5,1,44889.603261  
5,1,13429.791667  
5,1,2620.673077  
5,1,4849.578125  
5,1,1873.609375  
5,1,3075.496795  
5,1,1942.399306  
5,1,1801.875000  
5,1,3696.034722  
5,1,2803.109375  
5,1,5248.272727  
5,1,9668.023026  
5,1,5580.635870  
5,1,3814.702128  
5,1,2860.395833  
5,1,5875.406250  
5,1,19509.664062  
5,1,1900.608696  
5,1,2873.406977  
5,1,6233.959375  
5,1,5236.548077  
5,1,1843.333333  
5,1,11051.500000  
5,1,2047.722826  
5,1,1808.000000  
5,1,25951.937500  
5,1,3620.375000  
5,1,2058.539773  
5,1,3737.295455  
5,1,2194.617021  
5,1,13216.200000  
5,1,4212.326087  
5,1,2626.595238  
5,1,3088.654605  
5,1,37640.835714  
5,1,44944.680556  
5,1,1676.774194  
5,1,2728.574468  
5,1,1841.531250  
5,1,2855.429688  
5,1,2032.666667  
5,1,5788.252551  
5,1,4742.913386  
5,1,3562.394737  
5,1,3768.897222  
5,1,1604.000000  
5,1,53015.463415  
5,1,3119.620000  
5,1,22863.299419  
5,1,11041.618902

5,1,64958.790698  
5,1,3617.665698  
5,1,2287.750000  
5,1,1618.810811  
5,1,2063.325758  
5,1,2089.692308  
5,1,1513.725694  
5,1,2249.006944  
5,1,8965.250000  
5,1,1637.154070  
5,1,1532.716667  
5,1,3521.443182  
5,1,2231.557500  
5,1,2739.767857  
5,1,17671.088235  
5,1,5509.833333  
5,1,2067.436111  
5,1,2135.946429  
5,1,89311.552326  
5,1,2550.904762  
5,1,1705.830357  
5,1,11058.662500  
5,1,15963.298246  
5,1,27413.540625  
5,1,3548.616477  
5,1,1527.268293  
5,1,3038.516667  
5,1,5699.744681  
5,1,44079.705882  
5,1,3163.555556  
5,1,2497.684524  
5,1,134196.677632  
5,1,22595.057500  
5,1,56246.775000  
5,1,32105.552419  
5,1,2311.137500  
5,1,1946.605978  
5,1,5791.912791  
5,1,1738.395833  
5,1,3677.522222  
5,1,1930.005435  
5,1,1797.191489  
5,1,32702.410714  
5,1,59136.599265  
5,1,2500.914634  
5,1,2461.800000  
5,1,4013.000000  
5,1,31915.327703  
5,1,22511.250000  
5,1,1536.671429  
5,1,2092.143868  
5,1,2510.503049  
5,1,4042.048387  
5,1,3483.125000  
5,1,3598.668750  
5,1,4998.500000  
5,1,2306.875000  
5,1,8122.426829  
5,1,61262.500000  
5,1,2507.688889  
5,1,2018.605114  
5,1,78543.589744  
5,1,4085.737500  
5,1,2801.940476  
5,1,3739.234694  
5,1,4382.514205

5,1,1836.583333  
5,1,7559.890625  
5,1,58406.239286  
5,1,48302.833333  
5,1,2543.994444  
5,1,2205.785714  
5,1,1625.750000  
5,1,3309.550781  
5,1,2644.312500  
5,1,1695.137195  
5,1,1581.333333  
5,1,2339.333333  
5,1,5365.884615  
5,1,2530.553571  
5,1,2668.548077  
5,1,3732.944444  
5,1,9005.875000  
5,1,123969.772222  
5,1,11875.851351  
5,1,3951.762500  
5,1,102691.044872  
5,1,2125.675532  
5,1,4199.986486  
5,1,2067.700000  
5,1,2125.164773  
5,1,4745.687500  
5,1,36563.485714  
5,1,3228.375000  
5,1,3178.146875  
5,1,2659.000000  
5,1,1524.850000  
5,1,1870.325581  
5,1,11961.494792  
5,1,2468.897727  
5,1,3877.791045  
5,1,6020.246988  
5,1,6869.536585  
5,1,3840.400000  
5,1,10086.532738  
5,1,2287.125000  
5,1,3795.755102  
5,1,8589.277778  
5,1,3028.316129  
5,1,1743.262295  
5,1,2366.888889  
5,1,22734.181818  
5,1,8014.139205  
5,1,2188.414894  
5,1,2482.360294  
5,1,15232.526316  
5,1,4454.352273  
5,1,3339.714286  
5,1,3957.289773  
5,1,2979.556548  
5,1,24999.875000  
5,1,20863.150000  
5,1,3434.350000  
5,1,3324.898810  
5,1,2917.278409  
5,1,6251.416667  
5,1,5967.812500  
5,1,2098.238636  
5,1,1557.804878  
5,1,2216.807927  
5,1,2162.627907  
5,1,1740.302326

5,1,1742.041667  
5,1,1940.553977  
5,1,1802.487805  
5,1,2107.734694  
5,1,2246.250000  
5,1,3780.408537  
5,1,1725.637500  
5,1,2382.177778  
5,1,8783.187500  
5,1,2447.732639  
5,1,5169.122093  
5,1,5275.515625  
5,1,4063.125000  
5,1,1669.113372  
5,1,2066.195652  
6,2,3173.208092  
6,2,2439.982955  
6,2,1979.385787  
6,2,1500.250000  
6,2,4370.323864  
6,2,1970.087838  
6,2,1775.839286  
6,2,7528.229592  
6,2,5419.343750  
6,2,4606.229592  
6,2,1554.358553  
6,2,2479.226190  
6,2,3855.031977  
6,2,4125.750000  
6,2,1547.871711  
6,2,5027.181818  
6,2,7455.943182  
6,2,2414.111111  
6,2,2192.550000  
6,2,5383.916667  
6,2,3049.140625  
6,2,1971.250000  
6,2,2494.789474  
6,2,4545.136719  
6,2,3338.510204  
6,2,2113.576355  
6,2,1964.359375  
6,2,8357.220109  
6,2,3354.711864  
6,2,2663.070988  
6,2,2762.366279  
6,2,10250.871728  
6,2,4773.133333  
6,2,4254.472222  
6,2,4047.698630  
6,2,2493.345238  
6,2,3026.535714  
6,2,6434.625000  
6,2,2127.163793  
6,2,9137.080882  
6,2,11513.811364  
6,2,15251.782857  
6,2,6299.355769  
6,2,6427.142857  
6,2,2428.178363  
6,2,7376.325714  
6,2,1973.122995  
6,2,5376.555556  
6,2,3404.510870  
6,2,2057.670918  
6,2,1859.292614

6,2,8851.197917  
6,2,1829.841463  
6,2,2343.880795  
6,2,3959.164063  
6,2,2479.053977  
6,2,11082.051502  
6,2,2743.430556  
6,2,11146.997093  
6,2,1610.009146  
6,2,11157.293033  
6,2,1753.437500  
6,2,4208.600000  
6,2,1741.701923  
6,2,3652.460106  
6,2,5256.894737  
6,2,1722.531250  
6,2,8830.923729  
6,2,6402.833333  
6,2,4077.609043  
6,2,9988.142857  
6,2,6729.592391  
6,2,5791.051282  
6,2,8409.800000  
6,2,6396.336957  
6,2,3245.861111  
6,2,1757.166667  
6,2,5307.044444  
6,2,6154.383721  
6,2,2424.744681  
6,2,1961.195122  
6,2,3954.392857  
6,2,2161.259615  
6,2,2787.750000  
6,2,3901.548913  
6,2,2929.609756  
6,2,4953.955497  
6,2,1544.736842  
6,2,3360.470588  
6,2,3118.580729  
6,2,2668.848214  
6,2,7801.783784  
6,2,3730.512195  
6,2,2420.222222  
6,2,8158.500000  
6,2,1742.865000  
6,2,2535.295918  
6,2,7952.693627  
6,2,2502.365000  
6,2,2439.108696  
6,2,17572.345109  
6,2,2205.453947  
6,2,3304.960000  
6,2,2135.580000  
6,2,5346.476744  
6,2,3670.422222  
6,2,1843.346591  
6,2,3208.634146  
6,2,7226.965116  
6,2,1831.928571  
6,2,2930.911290  
6,2,2121.788462  
6,2,10087.276923  
6,2,3249.697917  
6,2,3822.500000  
6,2,1984.923077  
6,2,2219.980769

6,2,4646.682566  
6,2,3680.115385  
6,2,1916.242188  
6,2,2114.833333  
6,2,2309.204787  
6,2,6411.059211  
6,2,1674.325000  
6,2,2579.228723  
6,2,2078.233108  
6,2,2121.632353  
6,2,13759.261905  
6,2,1962.659218  
6,2,2921.849057  
6,2,2191.347328  
6,2,3109.058824  
6,2,4631.893750  
6,2,3473.414216  
6,2,4285.821429  
6,2,3664.187500  
6,2,5545.316860  
6,2,4570.875000  
6,2,5618.670732  
6,2,1768.675676  
6,2,1701.000000  
6,2,3476.544118  
6,2,1918.742647  
6,2,2902.210714  
6,2,2566.173077  
6,2,3972.043750  
6,2,1824.990385  
6,2,7426.666667  
6,2,3161.297872  
6,2,3774.536290  
6,2,2099.217105  
6,2,3770.299479  
6,2,2935.013587  
6,2,3427.828125  
6,2,2805.512931  
6,2,4672.473684  
6,2,4499.953488  
6,2,14560.195122  
6,2,7098.267361  
6,2,2403.312500  
6,2,1572.795213  
6,2,13345.465116  
6,2,2157.578125  
6,2,3995.038835  
6,2,1862.146341  
6,2,2256.151515  
6,2,2556.910714  
6,2,5321.093750  
6,2,1723.328947  
6,2,2250.136612  
6,2,2207.071429  
6,2,2088.774038  
6,2,9025.627358  
6,2,3138.300000  
6,2,5889.074766  
6,2,5959.500000  
6,2,4148.484848  
6,2,6186.421875  
6,2,3203.980296  
6,2,1851.383333  
6,2,2255.690217  
6,2,2795.185897  
6,2,5766.019737

6,2,9270.250000  
6,2,1502.642361  
6,2,4254.154255  
6,2,7023.964674  
6,2,1747.215116  
6,2,5012.588889  
6,2,4717.362745  
6,2,1580.112245  
6,2,1772.834239  
6,2,2695.544944  
6,2,4220.895349  
6,2,4560.522727  
6,2,2619.850543  
6,2,7570.354839  
6,2,10397.608108  
6,2,1942.701923  
6,2,7709.017442  
6,2,11294.622596  
6,2,1713.375000  
6,2,2251.195000  
6,2,2097.503125  
6,2,6390.204082  
6,2,9777.755814  
6,2,2970.048913  
6,2,2789.250000  
6,2,1811.171429  
6,2,2033.932927  
6,2,2953.718750  
6,2,2769.883152  
6,2,3389.432432  
6,2,4726.390625  
6,2,7469.810096  
6,2,4075.324324  
6,2,1914.564286  
6,2,2466.445000  
6,2,19187.812500  
6,2,2599.851064  
6,2,6032.720238  
6,2,1531.240385  
6,2,2406.291667  
6,2,3751.891960  
6,2,3259.851064  
6,2,2479.447581  
6,2,2190.878378  
6,2,1811.765957  
6,2,1686.929487  
6,2,4505.350000  
6,2,4477.055556  
6,2,2133.289773  
6,2,3145.415385  
6,2,6702.096939  
6,2,2072.111486  
6,2,1817.234756  
6,2,1714.252660  
6,2,2377.177083  
6,2,2232.764706  
6,2,1792.866279  
6,2,7938.815789  
6,2,2171.863636  
6,2,3428.117647  
6,2,2141.796512  
6,2,7123.224599  
6,2,6418.259777  
6,2,2260.085937  
6,2,4309.838816  
6,2,3692.354167

6,2,3203.111111  
6,2,3945.357639  
6,2,5947.797500  
6,2,4009.317568  
6,2,2364.153846  
6,2,4121.635135  
6,2,2773.073980  
6,2,9891.785714  
6,2,1943.155405  
6,2,3665.681250  
6,2,1622.532895  
6,2,21540.291667  
6,2,2974.320122  
6,2,8778.961538  
6,2,2089.859375  
6,2,4116.050000  
6,2,1623.732558  
6,2,1618.428571  
6,2,2411.404255  
6,2,6330.134615  
6,2,2035.933333  
6,2,1998.422222  
6,2,1665.625000  
6,2,1577.236486  
6,2,1592.615385  
6,2,2018.988636  
6,2,2417.406250  
6,2,10432.840000  
6,2,2212.627907  
6,2,2654.933735  
6,2,3052.765306  
6,2,2075.383495  
6,2,4486.479730  
6,2,3337.289340  
6,2,64467.990385  
6,2,2343.405093  
6,2,1511.845000  
6,2,3814.331395  
6,2,2380.595745  
6,2,1695.788462  
6,2,2648.384615  
6,2,5383.928191  
6,2,1787.000000  
6,2,2728.914773  
6,2,3762.904605  
6,2,7255.697917  
6,2,4325.776316  
6,2,3904.714286  
6,2,5790.552083  
6,2,3491.912500  
6,2,2557.170455  
6,2,1804.603261  
6,2,5678.307692  
6,2,1905.183140  
6,2,4141.122517  
6,2,2012.668605  
6,2,1954.492147  
6,2,1794.040541  
6,2,3278.156250  
6,2,2459.263158  
6,2,2673.606481  
6,2,1847.520833  
6,2,3182.725694  
6,2,1531.720745  
6,2,1734.093023  
6,2,5444.911111

6,2,4752.437853  
6,2,2845.211538  
6,2,1504.761905  
6,2,4064.812500  
6,2,9095.986486  
6,2,30370.413462  
6,2,3553.997685  
6,2,1839.255435  
6,2,6112.258475  
6,2,2553.625000  
6,2,1776.938776  
6,2,1850.083333  
6,2,5630.138158  
6,2,4525.371324  
6,2,2480.842105  
6,2,1879.517857  
6,2,3508.148649  
6,2,2207.355556  
6,2,2135.405405  
6,2,4155.431373  
6,2,2434.875000  
6,2,1636.735000  
6,2,4068.497222  
6,2,4909.270408  
6,2,2785.291667  
6,2,3630.747093  
6,2,1720.875000  
6,2,1648.386029  
6,2,2689.366667  
6,2,7548.901070  
6,2,2497.764286  
6,2,3977.191489  
6,2,5240.553191  
6,2,2325.093023  
6,2,2710.306818  
6,2,8735.065678  
6,2,1785.963415  
6,2,9594.363889  
6,2,11958.906780  
6,2,2517.667614  
6,2,4769.585938  
6,2,2181.825000  
6,2,2675.476744  
6,2,2279.087264  
6,2,5562.120370  
6,2,2125.190341  
6,2,16659.488636  
6,2,1827.389286  
6,2,1680.555556  
6,2,2471.831897  
6,2,2108.000000  
6,2,2579.500000  
6,2,5078.650000  
6,2,1807.368421  
6,2,5598.041667  
6,2,2210.230978  
6,2,2403.024390  
6,2,2292.907895  
6,2,2291.278846  
6,2,3394.337209  
6,2,2071.658537  
6,2,1712.063187  
6,2,2036.391447  
6,2,4206.750000  
6,2,1910.673077  
6,2,9323.308824

6,2,4575.625000  
6,2,9608.134868  
6,2,2105.823529  
6,2,8134.118750  
6,2,1525.653846  
6,2,1512.560000  
6,2,2141.041667  
6,2,4073.435897  
6,2,2940.605978  
6,2,1663.418605  
6,2,4110.722727  
6,2,10700.425926  
6,2,2950.490909  
6,2,1847.659091  
6,2,10201.620370  
6,2,7495.632353  
6,2,1981.970588  
6,2,2580.400000  
6,2,11323.101695  
6,2,1853.377907  
6,2,2758.578125  
6,2,7847.551020  
6,2,2914.046512  
6,2,3659.490385  
6,2,2539.405660  
6,2,2551.384615  
6,2,3758.135870  
6,2,2400.404891  
6,2,5620.322581  
6,2,2237.394737  
6,2,8453.335616  
6,2,3898.112981  
6,2,1628.845395  
6,2,2232.466667  
6,2,2247.945652  
6,2,2002.625000  
6,2,2883.281250  
6,2,2859.831019  
6,2,1979.533784  
6,2,4858.781250  
6,2,5022.764706  
6,2,2320.512821  
6,2,2000.580645  
6,2,2961.333333  
6,2,2692.750000  
6,2,8833.466346  
6,2,12616.613426  
6,2,2251.531915  
6,2,2771.669118  
6,2,4738.569444  
6,2,4867.521739  
6,2,3713.750000  
6,2,2675.022436  
6,2,9373.710000  
6,2,2279.500000  
6,2,5884.014205  
6,2,2519.828125  
6,2,7972.012500  
6,2,3392.615385  
6,2,3979.801630  
6,2,1791.454545  
6,2,1663.607143  
6,2,2550.000000  
6,2,1679.181250  
6,2,2260.617647  
6,2,3535.325000

6,2,3382.581522  
6,2,3043.771875  
6,2,2657.217105  
6,2,2381.953125  
6,2,3661.011364  
6,2,1948.046429  
6,2,2715.446809  
6,2,5383.043478  
6,2,3350.211921  
6,2,2984.223684  
6,2,1607.147436  
6,2,3472.306122  
6,2,1651.215278  
6,2,2897.888889  
6,2,1510.276316  
6,2,4405.251462  
6,2,13739.153191  
6,2,7985.669872  
6,2,1675.000000  
6,2,2484.428571  
6,2,1932.605769  
6,2,2255.398438  
6,2,1609.074324  
6,2,5151.375000  
6,2,4253.724138  
6,2,8807.375000  
6,2,3088.828125  
6,2,2844.521053  
6,2,8542.571809  
6,2,15930.608974  
6,2,3321.067708  
6,2,6216.529412  
6,2,3085.824324  
6,2,6461.296053  
6,2,3622.050000  
6,2,2717.559524  
6,2,2919.461187  
6,2,1531.475000  
6,2,1639.692308  
6,2,3911.357868  
6,2,1689.651934  
6,2,5822.945455  
6,2,1593.535714  
6,2,11703.682692  
6,2,3764.872159  
6,2,2988.292763  
6,2,5887.771739  
6,2,2121.368902  
6,2,3648.050000  
6,2,2071.912281  
6,2,3981.361702  
6,2,4682.910714  
6,2,7287.403846  
6,2,4803.000000  
6,2,2860.350446  
6,2,2912.727612  
6,2,10085.000000  
6,2,3293.542553  
6,2,2300.871795  
6,2,8284.032738  
6,2,1532.808824  
6,2,2495.116438  
6,2,4448.197115  
6,2,2332.166667  
6,2,5482.137195  
6,2,1660.625000

6,2,4897.842500  
6,2,1579.069079  
6,2,2243.573446  
6,2,1865.238372  
6,2,3092.578947  
6,2,6211.214286  
6,2,1538.550000  
6,2,11873.171196  
6,2,2463.602273  
6,2,11774.921875  
6,2,1737.541667  
6,2,3973.875000  
6,2,2072.810811  
6,2,2990.358553  
6,2,2447.053571  
6,2,6135.019231  
6,2,3400.604167  
6,2,2881.514535  
6,2,5435.454023  
6,2,1649.493976  
6,2,1704.813953  
6,2,2887.000000  
6,2,5989.377404  
6,2,3479.781250  
6,2,1592.193548  
6,2,2169.645161  
6,2,7482.718750  
6,2,2054.692308  
6,2,2833.562500  
6,2,2579.571809  
6,2,1646.500000  
6,2,12734.717593  
6,2,2519.010000  
6,2,1576.821429  
6,2,2630.872340  
6,2,4313.719388  
6,2,2045.630952  
6,2,3254.842857  
6,2,4823.476415  
6,2,2721.054054  
6,2,1913.458065  
6,2,6199.461538  
6,2,2843.000000  
6,2,6163.018519  
6,2,4095.696602  
6,2,2319.647727  
6,2,2460.278125  
6,2,1580.218750  
6,2,1969.173077  
6,2,6083.935976  
6,2,1618.100559  
6,2,3308.187166  
6,2,1812.854592  
6,2,6769.029412  
6,2,1571.618902  
6,2,2270.354167  
6,2,3601.823529  
6,2,2708.806122  
6,2,2248.921053  
6,2,6978.176991  
6,2,2012.863636  
6,2,1746.000000  
6,2,1513.461957  
6,2,3209.609375  
6,2,2431.007653  
6,2,3261.824000

6,2,2930.412162  
6,2,7306.358974  
6,2,8112.062500  
6,2,3971.250000  
6,2,2347.326923  
6,2,2190.750000  
6,2,1589.323034  
6,2,1631.777778  
6,2,2058.988372  
6,2,9731.185185  
6,2,1865.000000  
6,2,1556.472973  
6,2,2488.916667  
6,2,4300.340000  
6,2,6099.216346  
6,2,2582.451389  
6,2,2601.335000  
6,2,3428.503289  
6,2,2581.543981  
6,2,2959.209135  
6,2,1750.894886  
6,2,2328.649289  
6,2,8858.848485  
6,2,6065.902778  
6,2,13344.860795  
6,2,1615.857143  
6,2,3483.774038  
6,2,7348.363636  
6,2,1567.157895  
6,2,1862.473684  
6,2,6060.783333  
6,2,8801.779070  
6,2,14553.863636  
6,2,1892.211538  
6,2,6508.421875  
6,2,2824.206977  
6,2,2635.113497  
6,2,1965.000000  
6,2,2161.047170  
6,2,1850.089286  
6,2,2788.965000  
6,2,4647.000000  
6,2,3263.779255  
6,2,2430.461538  
6,2,4685.612500  
6,2,1665.344340  
6,2,2838.750000  
6,2,2634.628641  
6,2,2393.337766  
6,2,3754.534884  
6,2,2250.267857  
6,2,4497.831522  
6,2,5749.714912  
6,2,2276.521341  
6,2,6308.683673  
6,2,3225.820122  
6,2,1980.907609  
6,2,4516.508929  
6,2,3940.839286  
6,2,3591.807692  
6,2,1888.625000  
6,2,5964.446429  
6,2,15619.335227  
6,2,1967.182432  
6,2,1727.688889  
6,2,1922.468750

6,2,5579.614583  
6,2,3786.994792  
6,2,1870.930233  
6,2,3956.440104  
6,2,1584.186047  
6,2,1921.784884  
6,2,3286.301136  
6,2,1878.172619  
6,2,2946.565972  
6,2,1744.042683  
6,2,2778.362745  
6,2,2083.673913  
6,2,1998.939024  
6,2,4232.000000  
6,2,9807.082447  
6,2,2044.517857  
6,2,2234.041667  
6,2,1741.953804  
6,2,3741.381579  
6,2,1530.461538  
6,2,1769.919271  
6,2,2846.818182  
6,2,5248.141026  
6,2,6479.862745  
6,2,3830.904762  
6,2,2324.461735  
6,2,1630.061111  
6,2,4809.200000  
6,2,8255.155405  
6,2,3272.962963  
6,2,1667.263514  
6,2,4065.651163  
6,2,4686.296875  
6,2,12322.192308  
6,2,1683.564103  
6,2,5976.866667  
6,2,1713.796875  
6,2,2720.571429  
6,2,2195.579787  
6,2,1780.500000  
6,2,3521.164773  
6,2,1830.407895  
6,2,1641.708333  
6,2,6990.976562  
6,2,2815.314433  
6,2,3572.100000  
6,2,4694.021341  
6,2,3516.630952  
6,2,3049.209239  
6,2,4219.344907  
6,2,4947.608911  
6,2,2419.766304  
6,2,2392.500000  
6,2,2678.375000  
6,2,1788.951087  
6,2,2117.205000  
6,2,2386.294643  
6,2,2872.902439  
6,2,2552.414894  
6,2,1556.351351  
6,2,3282.031250  
6,2,4188.833333  
6,2,6969.773585  
6,2,3966.057927  
6,2,3233.576923  
6,2,2283.044118

6,2,2773.734043  
6,2,3243.465909  
6,2,6115.946429  
6,2,1920.625000  
6,2,4470.802632  
6,2,2154.461957  
6,2,4270.336957  
6,2,2824.975410  
6,2,2751.053977  
6,2,2064.368421  
6,2,1649.125000  
6,2,5399.694915  
6,2,2697.158333  
6,2,1608.159091  
6,2,2946.592857  
6,2,1518.964286  
6,2,7582.038462  
6,2,2405.411932  
6,2,9031.323718  
6,2,3901.354651  
6,2,9534.256818  
6,2,5776.339744  
6,2,3897.811047  
6,2,3089.867647  
6,2,3803.923469  
6,2,6185.596698  
6,2,3872.757075  
6,2,1683.868750  
6,2,1610.527778  
6,2,2319.481013  
6,2,1699.461538  
6,2,2329.612745  
6,2,6491.062500  
6,2,2209.057692  
6,2,5888.993750  
6,2,1512.187500  
6,2,19012.791667  
6,2,2172.076923  
6,2,1775.250000  
6,2,2252.524590  
6,2,1709.713450  
6,2,1811.218023  
6,2,2599.670455  
6,2,8553.129808  
6,2,2040.211538  
6,2,4340.457547  
6,2,13976.797297  
6,2,2929.704082  
6,2,4604.451220  
6,2,2537.977500  
6,2,2195.022222  
6,2,3813.542553  
6,2,4290.846154  
6,2,1966.615854  
6,2,1721.872093  
6,2,4144.505682  
6,2,4179.771429  
6,2,3789.375000  
6,2,2353.280612  
6,2,1526.196429  
6,2,1630.197368  
6,2,7327.654605  
6,2,9630.142857  
6,2,4054.571875  
6,2,2503.341463  
6,2,1531.136905

6,2,2283.121951  
6,2,5252.825000  
6,2,1917.834459  
6,2,3203.481132  
6,2,3442.986364  
6,2,2102.013889  
6,2,2056.255102  
6,2,15948.783333  
6,2,2298.644231  
6,2,1691.934375  
6,2,2983.707447  
6,2,1634.214286  
6,2,7748.940341  
6,2,2199.393229  
6,2,2752.068182  
6,2,11848.039474  
6,2,5785.000000  
6,2,2129.213816  
6,2,2244.819444  
6,2,2113.958333  
6,2,3811.021277  
6,2,2703.878378  
6,2,6185.329268  
6,2,3844.321429  
6,2,3863.872340  
6,2,3079.192308  
6,2,7798.564103  
6,2,1602.250000  
6,2,1578.286624  
6,2,2401.306034  
6,2,8145.541667  
6,2,2304.540000  
6,2,1662.316860  
6,2,3611.594595  
6,2,1590.621622  
6,2,2129.298295  
6,2,4472.834091  
6,2,3640.555556  
6,2,2607.218750  
6,2,1959.000000  
6,2,14789.136628  
6,2,12025.788043  
6,2,1896.091146  
6,2,1695.668605  
6,2,2276.236413  
6,2,2127.964286  
6,2,1684.732143  
6,2,16736.711538  
6,2,2819.637500  
6,2,1768.013158  
6,2,5399.695513  
6,2,2084.506944  
6,2,2525.250000  
6,2,3311.125000  
6,2,1717.086538  
6,2,2399.923913  
6,2,4496.542553  
6,2,5498.002717  
6,2,6835.000000  
6,2,2738.548077  
6,2,2292.850000  
6,2,8597.675000  
6,2,2189.720930  
6,2,1885.192708  
6,2,4534.414634  
6,2,3852.500000

6,2,1884.139073  
6,2,3940.853723  
6,2,1585.908163  
6,2,2234.453125  
6,2,1611.044643  
6,2,5842.641667  
6,2,27084.437500  
6,2,2208.082386  
6,2,3796.234375  
6,2,4412.034759  
6,2,2781.306122  
6,2,8577.652174  
6,2,4749.290698  
6,2,1671.864130  
6,2,3181.829268  
6,2,1801.992500  
6,2,3248.250000  
6,2,18036.196023  
6,2,4286.562500  
6,2,2158.703125  
6,2,1600.207317  
6,2,1735.831019  
6,2,1740.665816  
6,2,8677.837500  
6,2,1744.519737  
6,2,2202.976190  
6,2,4288.297872  
6,2,1906.078947  
6,2,2941.270270  
6,2,73063.333333  
6,2,1644.250000  
6,2,1940.926829  
6,2,2341.937500  
6,2,3659.942308  
6,2,6514.150000  
6,2,1692.821656  
6,2,1935.321053  
6,2,1996.056818  
6,2,1685.128571  
6,2,1513.011905  
6,2,3933.645833  
6,2,5710.136364  
6,2,2436.705882  
6,2,1891.029412  
6,2,1524.651163  
6,2,8264.515625  
6,2,2420.766026  
6,2,3354.383333  
6,2,3754.366071  
6,2,1857.875000  
6,2,2518.358974  
6,2,2113.694444  
6,2,7504.118644  
6,2,1519.836957  
6,2,1535.250000  
6,2,1580.871622  
6,2,2346.002404  
6,2,1961.557927  
6,2,1601.781250  
6,2,3621.596591  
6,2,1793.682065  
6,2,1809.733813  
6,2,1545.833333  
6,2,8079.262821  
6,2,12546.051887  
6,2,2925.572581

6,2,2067.767045  
6,2,2804.985294  
6,2,1944.277439  
6,2,2423.782609  
6,2,3768.670213  
6,2,3674.646341  
6,2,2914.285714  
6,2,2654.808824  
6,2,1798.532895  
6,2,1604.743590  
6,2,3825.600000  
6,2,2031.611111  
6,2,4250.718220  
6,2,2606.721154  
6,2,3465.567308  
6,2,3034.529070  
6,2,1874.989583  
6,2,2740.802469  
6,2,2518.925532  
6,2,4884.259615  
6,2,2350.729167  
6,2,2082.093750  
6,2,3912.180921  
6,2,2342.048077  
6,2,5657.573171  
6,2,2189.919118  
6,2,7382.861702  
6,2,1669.962766  
6,2,1769.555233  
6,2,4461.528846  
6,2,1628.281437  
6,2,2161.250000  
6,2,4384.724432  
6,2,2290.884615  
6,2,2373.502778  
6,2,3435.756098  
6,2,3042.172680  
6,2,9729.775000  
6,2,2086.575000  
6,2,2947.635135  
6,2,3237.961538  
6,2,1616.887755  
6,2,6142.441860  
6,2,7575.929825  
6,2,2711.931373  
6,2,1551.307692  
6,2,4217.306250  
6,2,1772.469388  
6,2,8863.000000  
6,2,6353.942073  
6,2,2965.850000  
6,2,3316.004630  
6,2,3322.058594  
6,2,11711.195652  
6,2,1887.400000  
6,2,1884.250000  
6,2,4873.636029  
6,2,1609.403125  
6,2,2698.000000  
6,2,4012.322581  
6,2,3429.750000  
6,2,2239.250000  
6,2,2745.668103  
6,2,11969.317073  
6,2,4014.407143  
6,2,2076.371951

6,2,3962.542683  
6,2,3329.148936  
6,2,1583.284574  
6,2,2919.837838  
6,2,1941.940625  
6,2,3220.533537  
6,2,1561.057927  
6,2,2211.086957  
6,2,5232.026163  
6,2,1808.279255  
6,2,1994.287500  
6,2,3437.703947  
6,2,2379.370787  
6,2,2729.895349  
6,2,2196.190625  
6,2,1914.261905  
6,2,3147.178571  
6,2,2888.601064  
6,2,3065.754902  
6,2,3168.978125  
6,2,3930.590164  
6,2,3319.061224  
6,2,1921.360795  
6,2,1879.746795  
6,2,1903.715640  
6,2,3826.550000  
6,2,1827.250000  
6,2,7123.904762  
6,2,8838.520833  
6,2,3181.265909  
6,2,2446.564103  
6,2,3906.750000  
6,2,5192.538462  
6,2,1678.777027  
6,2,8031.296875  
6,2,5128.802817  
6,2,3588.313953  
6,2,2817.517442  
6,2,1760.383721  
6,2,3993.256757  
6,2,2598.351974  
6,2,2986.179487  
6,2,2080.846429  
6,2,3198.289474  
6,2,4826.557065  
6,2,1820.875000  
6,2,1838.411932  
6,2,5026.229167  
6,2,3165.750000  
6,2,3518.031250  
6,2,5410.181818  
6,2,4963.005952  
6,2,4306.829268  
6,2,2535.914062  
6,2,4270.919192  
6,2,4033.469444  
6,2,3105.880435  
6,2,25616.857759  
6,2,1763.750000  
6,2,1540.744186  
6,2,5723.005525  
6,2,1796.519022  
6,2,2139.887500  
6,2,1838.633721  
6,2,2273.800000  
6,2,10213.117647

6,2,3120.209459  
6,2,4285.095000  
6,2,3055.192308  
6,2,3665.115854  
6,2,5932.750000  
6,2,1934.872093  
6,2,7352.316860  
6,2,1612.092105  
6,2,2109.189815  
6,2,2106.978125  
6,2,2771.500000  
6,2,5635.952500  
6,2,1790.800000  
6,2,1781.565217  
6,2,6019.000000  
6,2,2323.743902  
6,2,2712.959302  
6,2,3244.960227  
6,2,2258.277273  
6,2,2028.417969  
6,2,5926.119048  
6,2,1865.866477  
6,2,26517.005208  
6,2,2243.971429  
6,2,4955.082857  
6,2,2770.185185  
6,2,7249.400000  
6,2,3408.644231  
6,2,2272.320755  
6,2,1605.181548  
6,2,2644.402174  
6,2,2765.188725  
6,2,2314.767045  
6,2,4568.891304  
6,2,10513.653846  
6,2,2774.908088  
6,2,13203.580189  
6,2,3908.065972  
6,2,5418.034091  
6,2,7944.870536  
6,2,2374.914634  
6,2,1576.692308  
6,2,4389.908163  
6,2,1833.563830  
6,2,3050.016447  
6,2,1602.162791  
6,2,2238.097674  
6,2,2530.927807  
6,2,3448.337423  
6,2,11305.585938  
6,2,4422.747283  
6,2,4256.561224  
6,2,7377.605769  
6,2,3375.612245  
6,2,8022.988636  
6,2,4220.411765  
6,2,2615.861364  
6,2,3541.260204  
6,2,1621.631250  
6,2,1755.698864  
6,2,2195.975000  
6,2,4982.572864  
6,2,2407.205357  
6,2,1896.883234  
6,2,2235.112069  
6,2,12853.367647

6,2,6701.872340  
6,2,5255.039216  
6,2,3452.467391  
6,2,3184.235714  
6,2,3335.045455  
6,2,10987.717949  
6,2,2529.744444  
6,2,2356.666667  
6,2,1509.000000  
6,2,6399.579787  
6,2,1816.573864  
6,2,7306.986702  
6,2,1724.225806  
6,2,5011.434783  
6,2,2281.494186  
6,2,2404.777778  
6,2,6157.365741  
6,2,11428.696970  
6,2,2373.847973  
6,2,9083.734694  
6,2,2754.322222  
6,2,15248.616279  
6,2,2521.966667  
6,2,3777.102649  
6,2,11049.175781  
6,2,3039.352041  
6,2,2392.267857  
6,2,3129.897500  
6,2,1618.112805  
6,2,1581.849727  
6,2,5238.000000  
6,2,1773.673077  
6,2,1915.310976  
6,2,2448.093750  
6,2,8825.683333  
6,2,5785.278509  
6,2,1632.319079  
6,2,10093.021053  
6,2,2763.875000  
6,2,1662.083333  
6,2,2110.944444  
6,2,6573.648936  
6,2,3260.285714  
6,2,2141.872024  
6,2,2087.659375  
6,2,2638.975000  
6,2,3406.494186  
6,2,1870.448276  
6,2,2150.641711  
6,2,1588.460227  
6,2,3055.062500  
6,2,8711.697143  
6,2,4596.455497  
6,2,11580.782609  
6,2,1648.885714  
6,2,5428.653846  
6,2,1593.386364  
6,2,7496.406863  
6,2,11590.000000  
6,2,6962.665254  
6,2,4772.590909  
6,2,2156.406250  
6,2,2908.191406  
6,2,1715.571429  
6,2,2970.958333  
6,2,2393.250000

6,2,4063.528061  
6,2,1644.845238  
6,2,1731.494536  
6,2,1600.356481  
6,2,3587.255435  
6,2,2084.321429  
6,2,4728.113095  
6,2,4079.811275  
6,2,3351.377778  
6,2,2169.291667  
6,2,1672.832447  
6,2,5098.846154  
6,2,8934.327273  
6,2,2802.284314  
6,2,2081.418919  
6,2,2132.087500  
6,2,4637.490909  
6,2,5309.923077  
6,2,3665.561111  
6,2,14579.898936  
6,2,2104.768473  
6,2,2145.550000  
6,2,1943.575000  
6,2,4803.284722  
6,2,9810.082317  
6,2,4013.762500  
6,2,1750.116848  
6,2,2014.145349  
6,2,4592.111111  
6,2,1765.450000  
6,2,2292.637725  
6,2,1535.816327  
6,2,1638.743421  
6,2,13967.423077  
6,2,3008.790541  
6,2,4658.432692  
6,2,2654.664773  
6,2,3861.760870  
6,2,4141.919643  
6,2,3605.880435  
6,2,1540.500000  
6,2,1768.422222  
6,2,1713.942308  
6,2,3143.531250  
6,2,2403.207447  
6,2,1603.372093  
6,2,5492.375000  
6,2,2195.230769  
6,2,7392.300000  
6,2,5127.332237  
6,2,3108.645349  
6,2,2825.012195  
6,2,1575.081081  
6,2,5247.802326  
6,2,1530.581081  
6,2,1846.985294  
6,2,1866.674342  
6,2,1535.976562  
6,2,3668.590909  
6,2,1800.484756  
6,2,3004.031250  
6,2,7008.265306  
6,2,1903.582386  
6,2,1558.875000  
6,2,40894.265537  
6,2,6229.971154

6,2,4109.078125  
6,2,1808.333333  
6,2,3861.631250  
6,2,1866.988636  
6,2,6057.122449  
6,2,2173.421053  
6,2,2417.118056  
6,2,2264.151316  
6,2,2065.639752  
6,2,1510.153571  
6,2,2085.328125  
6,2,22110.416667  
6,2,2392.795918  
6,2,3208.014205  
6,2,2702.714286  
6,2,3992.433333  
6,2,2148.375000  
6,2,3466.059211  
6,2,4515.000000  
6,2,1560.489130  
6,2,3633.139535  
6,2,4163.670455  
6,2,1569.041667  
6,2,3653.315789  
6,2,1774.452514  
6,2,6283.189904  
6,2,5258.768750  
6,2,7443.442708  
6,2,3284.008523  
6,2,3605.530556  
6,2,5845.125000  
6,2,3409.103659  
6,2,1517.060606  
6,2,6233.712500  
6,2,2362.865854  
6,2,3918.975000  
6,2,16953.890909  
6,2,2694.518750  
6,2,1947.143617  
6,2,2969.333333  
6,2,1812.494318  
6,2,4287.119565  
6,2,5254.554348  
6,2,1670.750000  
6,2,4437.715909  
6,2,2509.310897  
6,2,12097.789474  
6,2,8209.382979  
6,2,2388.182320  
6,2,3473.865772  
6,2,3714.448113  
6,2,5235.419118  
6,2,3626.367347  
6,2,3279.551020  
6,2,4182.969325  
6,2,2293.471698  
6,2,3852.316327  
6,2,2679.237745  
6,2,2918.776163  
6,2,5012.579787  
6,2,1732.354730  
6,2,4354.003289  
6,2,2400.325000  
6,2,6815.494681  
6,2,1611.063830  
6,2,2127.625000

6,2,13582.747727  
6,2,6490.233333  
6,2,4116.478261  
6,2,3407.619048  
6,2,4658.739130  
6,2,2393.560976  
6,2,2739.621528  
6,2,2503.234091  
6,2,9154.969231  
6,2,4505.945122  
6,2,2348.470588  
6,2,1558.511628  
6,2,4347.209135  
6,2,2509.591837  
6,2,1699.395210  
6,2,6971.216981  
6,2,5574.057692  
6,2,12446.738636  
6,2,2277.013333  
6,2,1506.920139  
6,2,1983.261111  
6,2,2674.560811  
6,2,1954.631579  
6,2,1913.538462  
6,2,2032.859756  
6,2,1924.927374  
6,2,1725.007812  
6,2,4411.173780  
6,2,2516.988636  
6,2,2629.867021  
6,2,2544.960714  
6,2,7880.275281  
6,2,10723.224390  
6,2,2148.532847  
6,2,5685.993750  
6,2,8729.194712  
6,2,1710.567073  
6,2,5017.384804  
6,2,1649.176630  
6,2,8749.580311  
6,2,2190.643939  
6,2,1735.658228  
6,2,2360.475000  
6,2,9225.190476  
6,2,1821.400000  
6,2,1608.513514  
6,2,1993.038265  
6,2,2675.875000  
6,2,2551.667614  
6,2,4444.500000  
6,2,8456.625000  
6,2,5625.042553  
6,2,2012.543478  
6,2,1864.418750  
6,2,3337.434524  
6,2,4781.516827  
6,2,2811.102273  
6,2,7227.678571  
6,2,2734.105263  
6,2,7536.339286  
6,2,2918.549479  
6,2,1680.528846  
6,2,3768.641509  
6,2,12047.041667  
6,2,1831.666667  
6,2,8239.558824

6,2,1689.281046  
6,2,4849.902174  
6,2,3052.518293  
6,2,1676.558140  
6,2,2556.307870  
6,2,2939.540865  
6,2,2204.022222  
6,2,2272.815972  
6,2,2418.850000  
6,2,1671.969388  
6,2,3824.977723  
6,2,3116.702128  
6,2,2485.470000  
6,2,1568.148649  
6,2,6932.278409  
6,2,2143.881579  
6,2,7490.752747  
6,2,2009.845588  
6,2,1857.046196  
6,2,1512.625000  
6,2,5982.516667  
6,2,3158.619048  
6,2,3532.913636  
6,2,2507.153846  
6,2,3315.914474  
6,2,1825.288265  
6,2,4934.149351  
6,2,1811.825000  
6,2,3587.854430  
6,2,3532.725146  
6,2,6597.844828  
6,2,4357.696809  
6,2,3274.621287  
6,2,2371.327320  
6,2,9588.777778  
6,2,2004.900000  
6,2,4469.984043  
6,2,3527.900000  
6,2,3611.634146  
6,2,1601.000000  
6,2,3495.440217  
6,2,4583.861111  
6,2,1661.116959  
6,2,2558.291667  
6,2,1961.187500  
6,2,1625.211111  
6,2,3847.877778  
6,2,2745.427632  
6,2,8293.951389  
6,2,1894.666667  
6,2,4154.783784  
6,2,2315.936170  
6,2,2983.407143  
6,2,4049.705556  
6,2,4034.933333  
6,2,3014.986486  
6,2,3085.428571  
6,2,2826.414634  
6,2,2304.833333  
6,2,2953.078947  
6,2,3320.831633  
6,2,6637.730556  
6,2,2510.823529  
6,2,3147.035714  
6,2,1909.777778  
6,2,3877.763006

6,2,2935.730570  
6,2,4352.730994  
6,2,3697.776744  
6,2,3855.284884  
6,2,2254.843023  
6,2,2369.631098  
6,2,4718.243243  
6,2,1925.660000  
6,2,19023.882353  
6,2,1621.048780  
6,2,3797.359375  
6,2,13144.777778  
6,2,2669.772727  
6,2,1907.658228  
6,2,2585.572917  
6,2,7516.562500  
6,2,5866.992347  
6,2,2898.468085  
6,2,1674.125000  
6,2,1676.750000  
6,2,3461.154891  
6,2,22595.914062  
6,2,2345.279762  
6,2,4841.781250  
6,2,17215.330508  
6,2,3705.920673  
6,2,4050.230769  
6,2,2224.309896  
6,2,2217.698864  
6,2,3109.414894  
6,2,9044.973958  
6,2,5111.480000  
6,2,1871.981675  
6,2,6345.250000  
6,2,1945.230769  
6,2,1742.160000  
6,2,2484.994898  
6,2,1718.260870  
6,2,3648.441176  
6,2,2963.353125  
6,2,1575.823864  
6,2,1875.695122  
6,2,3459.508929  
6,2,10738.206452  
6,2,1780.080275  
6,2,2695.153061  
6,2,8985.228125  
6,2,4522.625000  
6,2,1589.505556  
6,2,3297.860465  
6,2,3326.691860  
6,2,3443.972826  
6,2,1820.646277  
6,2,5960.439024  
6,2,4418.247222  
6,2,1789.714286  
6,2,13832.416667  
6,2,1742.020833  
6,2,2606.486842  
6,2,1696.250000  
6,2,1622.791667  
6,2,2120.677711  
6,2,2937.600610  
6,2,2017.000000  
6,2,2182.279070  
6,2,3133.696809

6,2,3645.125000  
6,2,2645.363208  
6,2,1792.069767  
6,2,8125.511905  
6,2,4503.140957  
6,2,2079.883929  
6,2,1764.275000  
6,2,2945.392045  
6,2,2142.589286  
6,2,2259.862745  
6,2,1755.808511  
6,2,1817.224359  
6,2,1652.200000  
6,2,2149.510417  
6,2,1980.877778  
6,2,2560.957895  
6,2,4710.825000  
6,2,2358.000000  
6,2,4745.089286  
6,2,1568.956522  
6,2,6003.062500  
6,2,4696.750000  
6,2,5765.990741  
6,2,3229.007075  
6,2,7457.510204  
6,2,1658.171875  
6,2,1814.397959  
6,2,2951.819079  
6,2,2115.653646  
6,2,2031.130769  
6,2,2424.658537  
6,2,2908.125000  
6,2,2722.826087  
6,2,3277.737500  
6,2,2099.326531  
6,2,1596.357143  
6,2,10790.893617  
6,2,2058.141892  
6,2,3411.625000  
6,2,7340.346591  
6,2,6792.025862  
6,2,2261.000000  
6,2,1987.676630  
6,2,1900.375000  
6,2,3403.576923  
6,2,5827.724790  
6,2,4074.673077  
6,2,2042.521429  
6,2,2864.262821  
6,2,9276.721154  
6,2,25484.611111  
6,2,7350.547872  
6,2,12504.697917  
6,2,5375.865000  
6,2,3929.586111  
6,2,4152.462500  
6,2,1555.958084  
6,2,1783.445652  
6,2,2064.859375  
6,2,9288.303977  
6,2,4521.036842  
6,2,2081.630814  
6,2,2722.040865  
6,2,2859.708333  
6,2,6898.841667  
6,2,1503.750000

6,2,2687.224490  
6,2,2837.128049  
6,2,8551.671171  
6,2,1686.351064  
6,2,2038.409574  
6,2,1836.768707  
6,2,17604.373950  
6,2,14413.006098  
6,2,8346.083770  
6,2,7562.054688  
6,2,4465.558974  
6,2,4928.287500  
6,2,7021.705000  
6,2,3369.704545  
6,2,2237.578212  
6,2,1810.947368  
6,2,2415.625000  
6,2,5573.529412  
6,2,3721.420455  
6,2,12969.447222  
6,2,2502.755000  
6,2,3422.625000  
6,2,1939.959459  
6,2,4245.833333  
6,2,3744.946429  
6,2,2543.750000  
6,2,2890.500000  
6,2,3441.042683  
6,2,2729.875000  
6,2,2312.052632  
6,2,3976.025641  
6,2,2636.385870  
6,2,4497.052632  
6,2,1551.500000  
6,2,2085.343750  
6,2,1635.222222  
6,2,6949.420213  
6,2,2308.976744  
6,2,5043.041667  
6,2,7231.345588  
6,2,16419.921053  
6,2,1952.158654  
6,2,1993.197917  
6,2,9221.032609  
6,2,5573.706395  
6,2,11852.345930  
6,2,1542.693182  
6,2,1528.750000  
6,2,2169.625000  
6,2,2716.193878  
6,2,14943.234043  
6,2,1964.468750  
6,2,7141.392857  
6,2,2399.700000  
6,2,2676.807692  
6,2,4065.812500  
6,2,2662.082386  
6,2,2563.569767  
6,2,1813.670455  
6,2,2451.375000  
6,2,3627.858333  
6,2,3078.439189  
6,2,2137.918033  
6,2,4212.354167  
6,2,6266.347368  
6,2,2308.899371

6,2,2065.333333  
6,2,16064.500000  
6,2,2104.210526  
6,2,2492.105769  
6,2,7743.040201  
6,2,4252.201389  
6,2,1951.055556  
6,2,2489.902439  
6,2,3212.875000  
6,2,2479.204082  
6,2,6420.680556  
6,2,1592.576531  
6,2,2235.802632  
6,2,4889.750000  
6,2,1858.014535  
6,2,2177.872159  
6,2,4243.567073  
6,2,2447.259868  
6,2,2603.102273  
6,2,2457.754386  
6,2,3254.028205  
6,2,3649.750000  
6,2,6260.235000  
6,2,1657.000000  
6,2,5316.564286  
6,2,1860.336735  
6,2,1499.618590  
6,2,1718.205357  
6,2,1931.983871  
6,2,1707.641509  
6,2,1618.721591  
6,2,3431.512821  
6,2,2877.898810  
6,2,1567.246951  
6,2,8302.949761  
6,2,2390.021739  
6,2,1653.212121  
6,2,2766.839888  
6,2,7484.333333  
6,2,3467.237245  
6,2,2152.047297  
6,2,6869.636364  
6,2,10340.648148  
6,2,8742.000000  
6,2,1751.806250  
6,2,3882.750000  
6,2,5600.077670  
6,2,2613.900510  
6,2,1799.076923  
6,2,3203.343750  
6,2,2552.790698  
6,2,7152.194805  
6,2,2706.128049  
6,2,1504.801282  
6,2,3832.039216  
6,2,1774.714286  
6,2,13416.528409  
6,2,1958.628205  
6,2,3235.519231  
6,2,1957.088235  
6,2,2523.802632  
6,2,1595.893939  
6,2,2407.979592  
6,2,1532.566667  
6,2,3536.062500  
6,2,1611.051282

6,2,1939.377551  
6,2,1796.560976  
6,2,2846.200581  
6,2,4196.455882  
6,2,1547.625000  
6,2,2279.511628  
6,2,1913.260417  
6,2,1556.138158  
6,2,2865.434783  
6,2,2863.221939  
6,2,1955.046053  
6,2,3520.318919  
6,2,1504.646907  
6,2,2273.831325  
6,2,1670.260000  
6,2,7889.089286  
6,2,2385.493213  
6,2,6067.382353  
6,2,2495.441489  
6,2,1608.270349  
6,2,3426.163717  
6,2,1774.818182  
6,2,5023.707317  
6,2,1523.529605  
6,2,2783.333333  
6,2,2444.367188  
6,2,3670.138889  
6,2,2789.272222  
6,2,5094.857143  
6,2,13884.919643  
6,2,3236.022727  
6,2,8450.580569  
6,2,6297.866667  
6,2,2195.428571  
6,2,2355.541667  
6,2,1993.569444  
6,2,1667.761628  
6,2,1751.168478  
6,2,2176.756579  
6,2,1857.781250  
6,2,1621.418919  
6,2,2792.333333  
6,2,5080.046053  
6,2,4084.221939  
6,2,10624.861111  
6,2,3078.078125  
6,2,2102.589286  
6,2,6165.278226  
6,2,4668.404255  
6,2,6841.930693  
6,2,2677.372093  
6,2,2273.412791  
6,2,4884.477273  
6,2,7372.164894  
6,2,4547.261905  
6,2,5169.638889  
6,2,3428.187500  
6,2,2795.590909  
6,2,5483.955556  
6,2,2844.571429  
6,2,2903.935000  
6,2,5356.563830  
6,2,4258.285714  
6,2,2741.000000  
6,2,2632.250000  
6,2,6039.027778

6,2,1522.005319  
6,2,2131.048780  
6,2,1796.025568  
6,2,2847.761364  
6,2,2949.625000  
6,2,3823.660377  
6,2,1608.702703  
6,2,2456.840909  
6,2,2608.588235  
6,2,1699.872159  
6,2,1677.823864  
6,2,2436.574468  
6,2,1652.516304  
6,2,4662.976562  
6,2,2331.461957  
6,2,2950.125000  
6,2,4018.316176  
6,2,2056.632653  
6,2,2796.392857  
6,2,2340.416667  
6,2,2900.117647  
6,2,3206.517647  
6,2,2912.222222  
6,2,5685.343318  
6,2,1934.421053  
6,2,21712.634518  
6,2,3539.459184  
6,2,2455.996528  
6,2,6237.048780  
6,2,3958.801724  
6,2,2631.820513  
6,2,3268.321078  
6,2,3469.377451  
6,2,4005.662234  
6,2,12424.196429  
6,2,6676.237745  
6,2,13323.234375  
6,2,1896.216463  
6,2,2797.132653  
6,2,3646.489796  
6,2,11754.341667  
6,2,1505.000000  
6,2,8037.500000  
6,2,2845.756098  
6,2,1766.406250  
6,2,4512.916667  
6,2,7303.348837  
6,2,2714.700000  
6,2,3474.421053  
6,2,11508.872642  
6,2,2857.875000  
6,2,1546.752976  
6,2,6239.368421  
6,2,3521.772059  
6,2,1956.441860  
6,2,2617.993902  
6,2,1579.278846  
6,2,3137.875000  
6,2,2281.138393  
6,2,3594.059896  
6,2,4882.500000  
6,2,2054.954545  
6,2,1821.980769  
6,2,2001.250000  
6,2,6279.777778  
6,2,1518.728261

6,2,6214.823529  
6,2,3458.704268  
6,2,7990.018868  
6,2,3492.833333  
6,2,2640.031250  
6,2,1835.888158  
6,2,4204.451705  
6,2,3728.450000  
6,2,5001.888889  
6,2,2681.163934  
6,2,1983.035714  
6,2,3019.618357  
6,2,2428.262570  
6,2,1675.384615  
6,2,1519.545918  
6,2,2268.900000  
6,2,2290.412791  
6,2,3491.769397  
6,2,1766.524306  
6,2,1539.844444  
6,2,4337.681250  
6,2,7638.172500  
6,2,4993.243902  
6,2,2639.761905  
6,2,8316.278846  
6,2,1597.625000  
6,2,13012.440000  
6,2,2280.162304  
6,2,7385.200000  
6,2,2526.261364  
6,2,3035.893519  
6,2,2096.139535  
6,2,2063.963889  
6,2,3287.535088  
6,2,2252.372549  
6,2,3665.840116  
6,2,1919.076923  
6,2,1651.365385  
6,2,3398.906250  
6,2,1709.296053  
6,2,10279.129310  
6,2,1806.000000  
6,2,2404.075472  
6,2,2480.250000  
6,2,1703.061224  
6,2,5237.641447  
6,2,1880.395349  
6,2,4394.607955  
6,2,3478.208791  
6,2,2786.885246  
6,2,6205.166667  
6,2,1530.434211  
6,2,6394.859043  
6,2,1817.741477  
6,2,4260.506579  
6,2,2874.546875  
6,2,3331.737179  
6,2,1957.029605  
6,2,2382.735465  
6,2,2033.186047  
6,2,2411.559524  
6,2,3963.790179  
6,2,2615.280488  
6,2,2663.335106  
6,2,2049.846983  
6,2,9684.943548

6,2,4548.921053  
6,2,2197.511364  
6,2,8584.970000  
6,2,6651.500000  
6,2,2638.678571  
6,2,2729.437500  
6,2,1545.305389  
6,2,3908.521472  
6,2,2248.750000  
6,2,2856.171875  
6,2,1587.068750  
6,2,1679.293367  
6,2,19665.712963  
6,2,5935.655172  
6,2,2123.960526  
6,2,2322.848404  
6,2,2416.230769  
6,2,3650.313953  
6,2,2302.348684  
6,2,8466.189873  
6,2,1679.615196  
6,2,1906.910326  
6,2,11481.417683  
6,2,1504.753425  
6,2,2177.569767  
6,2,1835.323864  
6,2,4348.055000  
6,2,3018.741860  
6,2,1699.544118  
6,2,3439.125000  
6,2,12807.180556  
6,2,1722.923077  
6,2,8844.977273  
6,2,2219.342857  
6,2,2290.395833  
6,2,1640.809896  
6,2,7801.218137  
6,2,1560.837209  
6,2,4498.286585  
6,2,1566.152500  
6,2,2989.902439  
6,2,2219.695652  
6,2,5337.380952  
6,2,8053.804054  
6,2,2714.327778  
6,2,7069.272321  
6,2,1548.500000  
6,2,6290.088889  
6,2,3696.481707  
6,2,9629.976744  
6,2,6397.006757  
6,2,2722.075000  
6,2,6859.622378  
6,2,2162.972826  
6,2,1567.000000  
6,2,2519.558511  
6,2,3308.885246  
6,2,2386.836957  
6,2,6934.000000  
6,2,3215.605769  
6,2,1617.177778  
6,2,1890.150000  
6,2,2360.250000  
6,2,1526.625000  
6,2,3713.227273  
6,2,6373.333333

6,2,1981.783505  
6,2,3114.992647  
6,2,3171.658537  
6,2,13383.098958  
6,2,2160.615196  
6,2,2324.357143  
6,2,3526.500000  
6,2,4306.780612  
6,2,3146.301630  
6,2,2853.368421  
6,2,1764.322674  
6,2,1591.411458  
6,2,4080.702586  
6,2,1530.607143  
6,2,5374.442797  
6,2,7704.909091  
6,2,2333.593548  
6,2,3799.464286  
6,2,3321.349359  
6,2,1669.117021  
6,2,1514.482143  
6,2,3140.034574  
6,2,4248.200000  
6,2,2921.232143  
6,2,3016.803571  
6,2,1526.542683  
6,2,2554.575000  
6,2,4812.905612  
6,2,2243.196429  
6,2,2797.655367  
6,2,3176.857143  
6,2,5951.950000  
6,2,1684.042683  
6,2,3846.247253  
6,2,2282.195313  
6,2,1866.585034  
6,2,2154.812500  
6,2,1878.666667  
6,2,7845.021390  
6,2,11129.319767  
6,2,4473.184659  
6,2,1544.375000  
6,2,6887.377841  
6,2,1521.947368  
6,2,5345.466837  
6,2,1670.171053  
6,2,1567.812500  
6,2,6382.750000  
6,2,5520.936170  
6,2,2133.329082  
6,2,2862.384868  
6,2,4929.082386  
6,2,1645.715116  
6,2,2577.773810  
6,2,2544.271226  
6,2,4342.237179  
6,2,4672.398256  
6,2,1592.421053  
6,2,3825.569620  
6,2,2558.125000  
6,2,18715.300000  
6,2,2977.500000  
6,2,3586.673913  
6,2,3256.448980  
6,2,5244.502717  
6,2,2230.541667

6,2,2135.022222  
6,2,2342.552326  
6,2,2786.006579  
6,2,3250.565217  
6,2,7122.406863  
6,2,3598.411765  
6,2,5300.189024  
6,2,2025.431818  
6,2,2745.565789  
6,2,8138.562500  
6,2,3491.696429  
6,2,1683.961538  
6,2,1672.005814  
6,2,2232.769737  
6,2,4052.361702  
6,2,1832.292683  
6,2,2350.111702  
6,2,2135.219512  
6,2,1872.827381  
6,2,2390.966346  
6,2,2021.903846  
6,2,3976.071429  
6,2,3961.635870  
6,2,1852.812500  
6,2,1758.228723  
6,2,6374.795732  
6,2,2145.514881  
6,2,1933.113402  
6,2,4292.009662  
6,2,2849.945402  
6,2,7418.052632  
6,2,2440.206044  
6,2,3299.066667  
6,2,5220.834302  
6,2,1715.733108  
6,2,3445.429487  
6,2,1676.708333  
6,2,3057.479651  
6,2,4710.275000  
6,2,8071.166667  
6,2,6661.615385  
6,2,1716.704082  
6,2,2306.900000  
6,2,2240.185792  
6,2,2173.767857  
6,2,4674.145833  
6,2,2760.479651  
6,2,1666.539063  
6,2,2665.661765  
6,2,14184.112245  
6,2,4599.027027  
6,2,1548.472222  
6,2,1574.720109  
6,2,2763.076923  
6,2,2896.529255  
6,2,3417.646341  
6,2,2842.216867  
6,2,1873.281250  
6,2,2474.973684  
6,2,5736.717143  
6,2,1582.550802  
6,2,2497.754491  
6,2,2783.630682  
6,2,4571.564516  
6,2,1811.084459  
6,2,2163.107143

6,2,9305.244444  
6,2,3551.051020  
6,2,8610.377419  
6,2,1611.530093  
6,2,1508.792683  
6,2,1780.007812  
6,2,1963.859375  
6,2,3877.486111  
6,2,5240.701087  
6,2,1809.042500  
6,2,1593.468085  
6,2,1881.047904  
6,2,2330.387701  
6,2,2759.694079  
6,2,5315.333333  
6,2,2624.109043  
6,2,3131.387324  
6,2,1998.733333  
6,2,2859.046512  
6,2,3512.620370  
6,2,8886.247222  
6,2,6221.556886  
6,2,1707.592105  
6,2,1782.722222  
6,2,1952.812500  
6,2,6168.527174  
6,2,2238.959459  
6,2,1946.428125  
6,2,1928.755208  
6,2,3924.737981  
6,2,2563.657895  
6,2,14520.260000  
6,2,1906.486486  
6,2,2600.642857  
6,2,3464.035714  
6,2,6206.744792  
6,2,2375.812500  
6,2,3073.267857  
6,2,2880.804348  
6,2,4477.364286  
6,2,2730.441176  
6,2,2726.667553  
6,2,7520.131250  
6,2,2374.711538  
6,2,1705.241758  
6,2,2078.733333  
6,2,17941.234375  
6,2,2892.694444  
6,2,3446.535714  
6,2,16589.105263  
6,2,2134.532895  
6,2,2321.327586  
6,2,10569.593137  
6,2,1672.975000  
6,2,1821.233108  
6,2,4510.927136  
6,2,2486.090000  
6,2,3556.972826  
6,2,1740.828125  
6,2,9758.329545  
6,2,2110.016304  
6,2,1568.475610  
6,2,3481.284091  
6,2,3983.725490  
6,2,1615.016304  
6,2,1522.647059

6,2,1942.175000  
6,2,3999.253289  
6,2,1711.852740  
6,2,4718.781818  
6,2,10069.225000  
6,2,19185.080000  
6,2,4065.070000  
6,2,2595.898936  
6,2,1653.880000  
6,2,9245.000000  
6,2,2157.900000  
6,2,2070.142857  
6,2,4538.817935  
6,2,1507.608974  
6,2,3313.640244  
6,2,3631.288889  
6,2,1949.372340  
6,2,5401.843750  
6,2,4533.912791  
6,2,2137.804878  
6,2,9576.810000  
6,2,1936.826531  
6,2,7996.118280  
6,2,2569.000000  
6,2,4699.728022  
6,2,5070.747475  
6,2,1782.345930  
6,2,1792.027027  
6,2,1758.193396  
6,2,6811.678571  
6,2,32150.880952  
6,2,3207.597222  
6,2,1896.266667  
6,2,1655.521739  
6,2,2192.076389  
6,2,4334.044643  
6,2,2807.753289  
6,2,2284.955000  
6,2,8908.580189  
6,2,3383.746622  
6,2,3402.516667  
6,2,1820.984694  
6,2,2382.480447  
6,2,3727.500000  
6,2,8021.178571  
6,2,3885.648810  
6,2,10107.821429  
6,2,2129.734375  
6,2,1878.369318  
6,2,5093.683140  
6,2,2983.573864  
6,2,2485.176282  
6,2,6040.514706  
6,2,1667.825000  
6,2,2334.243902  
6,2,5918.448276  
6,2,2932.512195  
6,2,2297.273936  
6,2,4388.177778  
6,2,1600.869565  
6,2,3633.916667  
6,2,2109.444444  
6,2,4261.527273  
6,2,4159.292614  
6,2,2055.377404  
6,2,2614.076923

6,2,1597.915698  
6,2,5742.046784  
6,2,3881.110849  
6,2,1710.820513  
6,2,7030.659091  
6,2,5030.675676  
6,2,6548.910615  
6,2,2931.389908  
6,2,3155.736111  
6,2,3017.808140  
6,2,4175.730088  
6,2,2159.544304  
6,2,10316.288462  
6,2,2895.900000  
6,2,3587.207143  
6,2,2434.186047  
6,2,7064.782738  
6,2,6975.987864  
6,2,1973.266892  
6,2,5063.898148  
6,2,4090.019737  
6,2,5137.250000  
6,2,3748.916667  
6,2,6042.250000  
6,2,5301.436224  
6,2,4366.000000  
6,2,2419.395349  
6,2,2702.485000  
6,2,1519.404762  
6,2,2452.350543  
6,2,3345.600000  
6,2,1951.930851  
6,2,5435.114130  
6,2,1779.000000  
6,2,3556.500000  
6,2,1575.560811  
6,2,5274.351064  
6,2,1526.208333  
6,2,1713.904891  
6,2,4192.226562  
6,2,7031.514851  
6,2,2449.565789  
6,2,11137.764706  
6,2,4384.678571  
6,2,2583.085106  
6,2,5364.953125  
6,2,2051.240854  
6,2,1673.553191  
6,2,1710.843137  
6,2,2014.792056  
6,2,3038.347087  
6,2,3124.967391  
6,2,7136.146552  
6,2,2330.445122  
6,2,6971.151042  
6,2,13696.904167  
6,2,1947.682065  
6,2,2310.666667  
6,2,3240.083333  
6,2,1992.483696  
6,2,16107.870283  
6,2,4627.500000  
6,2,1833.684896  
6,2,4840.127604  
6,2,4415.000000  
6,2,2685.215686

6,2,3088.128713  
6,2,2286.915385  
6,2,2441.426316  
6,2,6786.581395  
6,2,2381.826531  
6,2,8429.065789  
6,2,3089.750000  
6,2,2913.710714  
6,2,9081.075758  
6,2,2060.203947  
6,2,5510.025000  
6,2,3808.054688  
6,2,2042.985577  
6,2,2530.607143  
6,2,5525.389205  
6,2,1576.250000  
6,2,3302.966146  
6,2,4312.377660  
6,2,3876.812500  
6,2,4302.152174  
6,2,4102.519231  
6,2,2927.483333  
6,2,10523.797872  
6,2,14075.625000  
6,2,3047.038462  
6,2,5544.057692  
6,2,7855.529412  
6,2,1519.097561  
6,2,2253.308901  
6,2,2035.606218  
6,2,2374.546875  
6,2,2374.460227  
6,2,1831.154762  
6,2,1748.000000  
6,2,11506.897368  
6,2,2053.823529  
6,2,4860.714286  
6,2,4091.585227  
6,2,7694.921053  
6,2,3398.223958  
6,2,2919.954082  
6,2,3238.079545  
6,2,3325.281250  
6,2,2812.524390  
6,2,6343.709302  
6,2,3881.754464  
6,2,9136.021875  
6,2,2870.176471  
6,2,5466.473404  
6,2,2732.250000  
6,2,3163.019231  
6,2,3836.733696  
6,2,1718.856383  
6,2,1599.189189  
6,2,4589.494681  
6,2,3985.127660  
6,2,1601.173653  
6,2,2186.357639  
6,2,11633.931250  
6,2,2536.421053  
6,2,2876.666667  
6,2,5786.870968  
6,2,3172.674528  
6,2,3065.841216  
6,2,34178.205128  
6,2,2341.509615

6,2,2988.354839  
6,2,1919.042857  
6,2,2201.952381  
6,2,1893.463816  
6,2,7709.480114  
6,2,1828.953488  
6,2,1947.215116  
6,2,3458.514286  
6,2,1515.356383  
6,2,1844.682432  
6,2,1803.530612  
6,2,5839.062500  
6,2,4873.472222  
6,2,2407.500000  
6,2,8515.272727  
6,2,5434.972973  
6,2,2036.893617  
6,2,4999.816327  
6,2,5272.442708  
6,2,1597.882353  
6,2,2303.875000  
6,2,3024.017241  
6,2,2763.011364  
6,2,2377.008523  
6,2,5244.957589  
6,2,4581.395349  
6,2,4443.257812  
6,2,2642.746795  
6,2,5271.106383  
6,2,4210.387500  
6,2,1796.061224  
6,2,1743.737931  
6,2,2975.339286  
6,2,2139.953488  
6,2,4469.005208  
6,2,15280.796296  
6,2,5958.722222  
6,2,1773.712500  
6,2,2529.525000  
6,2,4605.400000  
6,2,1656.739130  
6,2,5200.755556  
6,2,9645.002660  
6,2,10242.736702  
6,2,3465.872340  
6,2,11527.083333  
6,2,2047.861111  
6,2,2065.731383  
6,2,4455.540541  
6,2,1612.578947  
6,2,1512.488889  
6,2,2472.910377  
6,2,2862.888298  
6,2,5014.423780  
6,2,5007.852041  
6,2,4991.277174  
6,2,6399.833333  
6,2,1561.920673  
6,2,2696.358974  
6,2,2092.594595  
6,2,1885.654762  
6,2,2093.808511  
6,2,4133.922619  
6,2,2188.796196  
6,2,1523.008152  
6,2,4165.714286

6,2,2346.675000  
6,2,2065.759259  
6,2,3525.151832  
6,2,7226.810056  
6,2,3405.616667  
6,2,6272.605556  
6,2,1716.930556  
6,2,2372.541667  
6,2,43333.882591  
6,2,1920.300000  
6,2,4551.312500  
6,2,2986.705882  
6,2,3724.020833  
6,2,3397.750000  
6,2,3724.692308  
6,2,3022.594444  
6,2,5813.152439  
6,2,2336.560000  
6,2,2460.204545  
6,2,4387.045732  
6,2,3958.895349  
6,2,2121.648256  
6,2,10003.156250  
6,2,2599.882979  
6,2,1564.318182  
6,2,2868.759375  
6,2,2836.950000  
6,2,2068.780488  
6,2,5114.054545  
6,2,1642.128289  
6,2,1552.367347  
6,2,2242.615909  
6,2,6632.506579  
6,2,2085.993377  
6,2,3569.084302  
6,2,3645.863426  
6,2,1830.622093  
6,2,5580.744681  
6,2,5818.171875  
6,2,4470.646226  
6,2,12993.382979  
6,2,6266.795745  
6,2,14701.000000  
6,2,2363.671196  
6,2,1574.035256  
6,2,1566.950000  
6,2,7629.200000  
6,2,2614.849265  
6,2,1543.628049  
6,2,2466.535000  
6,2,2621.500000  
6,2,14605.153846  
6,2,3937.587766  
6,2,1660.816327  
6,2,2519.295082  
6,2,4513.109948  
6,2,7273.459184  
6,2,4271.300000  
6,2,8175.048077  
6,2,1833.370000  
6,2,5028.779605  
6,2,2487.006250  
6,2,2452.453947  
6,2,26292.009146  
6,2,2771.653846  
6,2,3617.982143

6,2,2001.612500  
6,2,2936.590909  
6,2,5522.059896  
6,2,2898.786458  
6,2,1838.743902  
6,2,2591.390306  
6,2,4540.925926  
6,2,5872.087500  
6,2,2853.278571  
6,2,4592.675000  
6,2,3653.588235  
6,2,2046.075000  
6,2,4516.951220  
6,2,12861.490798  
6,2,6080.882353  
6,2,4649.400000  
6,2,2870.332447  
6,2,17958.235465  
6,2,5387.420732  
6,2,2858.581522  
6,2,2463.263514  
6,2,3855.244565  
6,2,3103.221557  
6,2,3421.573529  
6,2,1547.241379  
6,2,1984.926829  
6,2,1696.855263  
6,2,6413.854167  
6,2,3844.416667  
6,2,8260.015625  
6,2,3582.279070  
6,2,2023.602273  
6,2,1671.989796  
6,2,1674.400000  
6,2,1538.231618  
6,2,1564.766667  
6,2,2362.297297  
6,2,2650.500000  
6,2,1656.886364  
6,2,2014.228448  
6,2,3683.829787  
6,2,1791.192982  
6,2,3924.417178  
6,2,2022.239130  
6,2,8459.200000  
6,2,2610.444444  
6,2,1862.964674  
6,2,3508.741667  
6,2,5132.888889  
6,2,1790.718750  
6,2,8474.247222  
6,2,1712.171875  
6,2,2179.304348  
6,2,14635.500000  
6,2,4461.259375  
6,2,3322.793367  
6,2,3806.576705  
6,2,3585.317568  
6,2,2784.569149  
6,2,2257.696429  
6,2,9484.640625  
6,2,4870.821023  
6,2,2158.548077  
6,2,3094.552486  
6,2,1989.750000  
6,2,2361.739362

6,2,3485.812500  
6,2,2821.048611  
6,2,5148.062500  
6,2,3822.006250  
6,2,4228.750000  
6,2,4913.887500  
6,2,2029.601266  
6,2,1635.758929  
6,2,8148.600000  
6,2,3250.062500  
6,2,2485.688889  
6,2,3029.200000  
6,2,4329.473214  
6,2,3340.622093  
6,2,1841.578947  
6,2,2178.418750  
6,2,2359.980676  
6,2,2092.375000  
6,2,7196.083333  
6,2,1685.015625  
6,2,4016.263587  
6,2,3330.320652  
6,2,2013.768072  
6,2,2258.106509  
6,2,2098.528409  
6,2,3678.500000  
6,2,2107.134146  
6,2,1884.857143  
6,2,3307.805921  
6,2,3416.773585  
6,2,1842.309211  
6,2,1697.776596  
6,2,3625.795918  
6,2,4999.194853  
6,2,6188.894737  
6,2,5621.079268  
6,2,5169.200000  
6,2,14061.243421  
6,2,1902.108108  
6,2,4528.700000  
6,2,4270.080000  
6,2,4136.543478  
6,2,2664.208333  
6,2,3271.386905  
6,2,1605.743243  
6,2,7239.284375  
6,2,4465.619048  
6,2,3571.062500  
6,2,7100.015000  
6,2,2325.536585  
6,2,3213.159091  
6,2,6498.478723  
6,2,1695.783019  
6,2,2537.344828  
6,2,2344.382353  
6,2,8413.062500  
6,2,2205.698276  
6,2,3804.204545  
6,2,10161.237500  
6,2,2159.820225  
6,2,2096.167401  
6,2,2887.911765  
6,2,2391.525000  
6,2,9607.382979  
6,2,7498.694805  
6,2,2953.406250

6,2,4089.375000  
6,2,4977.028846  
6,2,2033.214286  
6,2,3185.280405  
6,2,2569.855263  
6,2,2075.583333  
6,2,1631.491979  
6,2,22401.796117  
6,2,2726.570588  
6,2,1591.552778  
6,2,2260.375000  
6,2,2102.659091  
6,2,9076.625000  
6,2,4114.196429  
6,2,5801.732143  
6,2,3425.239130  
6,2,3595.018519  
6,2,3149.702128  
6,2,2098.195313  
6,2,3869.945455  
6,2,5199.585938  
6,2,2006.580556  
6,2,2023.017045  
6,2,1814.625000  
6,2,8589.250000  
6,2,1690.009868  
6,2,1794.031977  
6,2,1572.282895  
6,2,2723.487179  
6,2,1721.198529  
6,2,3022.821429  
6,2,2820.163793  
6,2,1534.489362  
6,2,3700.150000  
6,2,3228.978723  
6,2,2817.702381  
6,2,1934.368421  
6,2,2425.101064  
6,2,7019.348837  
6,2,2475.988095  
6,2,4065.602410  
6,2,4478.787500  
6,2,2614.181818  
6,2,1721.893617  
6,2,1602.204545  
6,2,1890.559659  
6,2,1638.289474  
6,2,2909.388889  
6,2,2827.565217  
6,2,3596.686321  
6,2,4387.220455  
6,2,1604.315789  
6,2,3513.680556  
6,2,2238.789773  
6,2,5772.714286  
6,2,1995.342105  
6,2,3919.789634  
6,2,3367.319712  
6,2,7053.231383  
6,2,6558.648649  
6,2,5056.148148  
6,2,2451.321809  
6,2,1726.108974  
6,2,1957.730000  
6,2,2884.040541  
6,2,5202.668919

6,2,1710.750000  
6,2,2468.057895  
6,2,3601.838816  
6,2,2627.621429  
6,2,3076.442308  
6,2,1617.872093  
6,2,2425.502778  
6,2,2495.541667  
6,2,3562.864865  
6,2,1951.378472  
6,2,3194.804054  
6,2,7090.962500  
6,2,5263.585938  
6,2,1832.840909  
6,2,2776.875000  
6,2,3006.957447  
6,2,6315.872340  
6,2,4819.173295  
6,2,2420.028571  
6,2,1509.062500  
6,2,1682.671429  
6,2,12074.178571  
6,2,3585.292453  
6,2,11443.584184  
6,2,3183.321429  
6,2,8364.511364  
6,2,1550.270408  
6,2,5902.833333  
6,2,3777.603352  
6,2,1506.019737  
6,2,2634.056250  
6,2,3128.348039  
6,2,3329.600000  
6,2,2924.372549  
6,2,3020.531250  
6,2,5420.700000  
6,2,1755.472973  
6,2,3932.798077  
6,2,2754.253205  
6,2,2164.125000  
6,2,1529.538462  
6,2,3102.150000  
6,2,3774.720745  
6,2,4047.483871  
6,2,5402.679144  
6,2,1683.368182  
6,2,1617.567073  
6,2,26644.500000  
6,2,2527.221698  
6,2,10153.787500  
6,2,2573.608553  
6,2,4348.479167  
6,2,2413.500000  
6,2,1783.684659  
6,2,4062.500000  
6,2,1626.760135  
6,2,2191.448171  
6,2,1517.502907  
6,2,7136.487179  
6,2,2550.785714  
6,2,32866.349432  
6,2,7812.810056  
6,2,3226.513514  
6,2,3438.500000  
6,2,2677.302083  
6,2,4253.270270

6,2,2117.771739  
6,2,2736.171053  
6,2,1884.080000  
6,2,2551.987179  
6,2,1842.164773  
6,2,7942.120000  
6,2,2735.714286  
6,2,3538.682065  
6,2,3165.346939  
6,2,3025.631696  
6,2,7685.614130  
6,2,3422.843023  
6,2,177181.134286  
6,2,8181.288462  
6,2,3213.847222  
6,2,6608.661364  
6,2,2804.418919  
6,2,3214.672297  
6,2,2158.628472  
6,2,4405.111111  
6,2,5492.854651  
6,2,4140.166667  
6,2,6314.392045  
6,2,4285.588816  
6,2,1976.878049  
6,2,1516.461538  
6,2,1510.795455  
6,2,2952.913043  
6,2,2456.070707  
6,2,2304.247525  
6,2,6894.787129  
6,2,4030.027778  
6,2,2481.959091  
6,2,2242.511364  
6,2,12470.864780  
6,2,5298.748889  
6,2,6751.483516  
6,2,1812.007353  
6,2,1521.548913  
6,2,7947.627604  
6,2,3629.210227  
6,2,2178.436275  
6,2,2692.133333  
6,2,3041.776786  
6,2,10974.387097  
6,2,1734.710366  
6,2,1713.329268  
6,2,7790.271739  
6,2,2801.330357  
6,2,2180.520270  
6,2,3593.622222  
6,2,13367.508696  
6,2,1565.421053  
6,2,7112.104938  
6,2,1737.179487  
6,2,1524.033333  
6,2,5457.170732  
6,2,1762.730769  
6,2,4772.906250  
6,2,2306.953804  
6,2,3379.760000  
6,2,1844.255682  
6,2,23762.250000  
6,2,1811.748603  
6,2,2547.105263  
6,2,8754.331522

6,2,7272.975000  
6,2,2450.494898  
6,2,9992.678571  
6,2,5536.647222  
6,2,6387.500000  
6,2,2320.979532  
6,2,2535.854167  
6,2,2315.423077  
6,2,2895.613636  
6,2,2320.548913  
6,2,3779.218750  
6,2,2948.744076  
6,2,5249.817568  
6,2,2576.200000  
6,2,2566.325581  
6,2,14207.693878  
6,2,1572.263587  
6,2,8385.236842  
6,2,13361.264151  
6,2,2344.857143  
6,2,3412.648936  
6,2,3866.241477  
6,2,6814.828125  
6,2,4730.774457  
6,2,4380.272727  
6,2,1772.304878  
6,2,2037.517361  
6,2,4524.976064  
6,2,2133.125000  
6,2,3430.333333  
6,2,1524.678571  
6,2,2578.304878  
6,2,2656.075000  
6,2,2072.000000  
6,2,15244.309406  
6,2,5424.840909  
6,2,6695.101351  
6,2,1837.680851  
6,2,1772.800000  
6,2,4239.866667  
6,2,3477.008929  
6,2,1524.404255  
6,2,2831.721311  
6,2,1510.635638  
6,2,5125.648256  
6,2,5549.298387  
6,2,4802.210884  
6,2,1769.977941  
6,2,6792.850000  
6,2,5115.183908  
6,2,1944.758523  
6,2,4511.817568  
6,2,8868.022727  
6,2,2412.163462  
6,2,1951.211538  
6,2,2564.411111  
6,2,4677.115385  
6,2,2894.055851  
6,2,2739.274390  
6,2,3695.235795  
6,2,3837.455556  
6,2,1597.631579  
6,2,4925.614865  
6,2,1890.118421  
6,2,1722.418981  
6,2,7653.259615

6,2,4292.312500  
6,2,9945.607143  
6,2,1645.068182  
6,2,3871.871324  
6,2,11434.823529  
6,2,2865.201117  
6,2,8240.634615  
6,2,2360.733766  
6,2,3307.197674  
6,2,2549.740506  
6,2,1771.054054  
6,2,5487.319149  
6,2,3065.987805  
6,2,1756.809524  
6,2,2443.593750  
6,2,2152.166667  
6,2,6411.491071  
6,2,3852.279255  
6,2,9443.794872  
6,2,1638.133333  
6,2,2328.981250  
6,2,2231.192568  
6,2,1957.400602  
6,2,3106.086538  
6,2,2290.179688  
6,2,2018.195531  
6,2,12734.221311  
6,2,5871.212766  
6,2,3249.369186  
6,2,3466.137500  
6,2,2253.750000  
6,2,2642.201087  
6,2,7317.851852  
6,2,2818.347826  
6,2,2910.481250  
6,2,1772.298780  
6,2,7019.959677  
6,2,2124.625000  
6,2,1911.638158  
6,2,2592.135638  
6,2,3567.338235  
6,2,3419.338235  
6,2,1556.837838  
6,2,2302.600000  
6,2,18195.734756  
6,2,2728.364706  
6,2,3114.187500  
6,2,4213.244898  
6,2,1697.000000  
6,2,2152.908163  
6,2,2497.360000  
6,2,3315.943182  
6,2,2511.632353  
6,2,2136.607143  
6,2,4653.589674  
6,2,2196.555556  
6,2,2626.097765  
6,2,4886.778443  
6,2,8194.578804  
6,2,2420.236842  
6,2,2637.926829  
6,2,4691.513158  
6,2,4279.602778  
6,2,2037.022222  
6,2,2566.369318  
6,2,5343.678571

6,2,2956.339744  
6,2,2160.375000  
6,2,1802.395833  
6,2,12735.375000  
6,2,4724.335526  
6,2,1743.132812  
6,2,2315.346154  
6,2,2376.211735  
6,2,3826.798913  
6,2,5696.416667  
6,2,8388.571875  
6,2,1568.994186  
6,2,12056.689286  
6,2,1967.900000  
6,2,4246.125000  
6,2,1971.529762  
6,2,2372.526042  
6,2,2181.784091  
6,2,2842.717391  
6,2,6277.960106  
6,2,4483.426471  
6,2,4426.781250  
6,2,3039.097826  
6,2,8112.145833  
6,2,3526.702381  
6,2,3285.695652  
6,2,2050.795918  
6,2,4002.500000  
6,2,9921.508929  
6,2,3088.680556  
6,2,1697.300948  
6,2,20398.648649  
6,2,5398.761905  
6,2,1645.687500  
6,2,2449.609375  
6,2,3577.840000  
6,2,1978.189103  
6,2,2574.935484  
6,2,1659.700000  
6,2,2160.591195  
6,2,12801.698718  
6,2,3268.875000  
6,2,4416.375000  
6,2,4072.951220  
6,2,1997.070122  
6,2,3113.767500  
6,2,3322.231818  
6,2,6085.972727  
6,2,7154.675000  
6,2,1651.576687  
6,2,2179.437500  
6,2,2675.711538  
6,2,4812.163043  
6,2,9593.221354  
6,2,2920.696429  
6,2,3995.686047  
6,2,1733.708333  
6,2,1622.380000  
6,2,9050.033333  
6,2,2701.564024  
6,2,2375.055556  
6,2,5333.539634  
6,2,7298.500000  
6,2,5325.361979  
6,2,4329.040541  
6,2,19208.552966

6,2,6310.000000  
6,2,3921.112245  
6,2,1992.577500  
6,2,1895.500000  
6,2,11301.503067  
6,2,1994.500000  
6,2,2494.670732  
6,2,2051.304348  
6,2,7907.468750  
6,2,2189.916667  
6,2,2751.288194  
6,2,13281.380597  
6,2,4557.219512  
6,2,1953.127907  
6,2,2562.800000  
6,2,3950.767857  
6,2,2770.285000  
6,2,3567.813830  
6,2,2392.643750  
6,2,1814.346154  
6,2,3245.830357  
6,2,2000.875000  
6,2,1878.682119  
6,2,6485.227273  
6,2,34297.625000  
6,2,1810.726190  
6,2,1752.888158  
6,2,2252.513514  
6,2,1752.427632  
6,2,2505.105263  
6,2,2078.931818  
6,2,3456.720238  
6,2,8223.176136  
6,2,3659.083333  
6,2,12413.478774  
6,2,2703.687500  
6,2,1968.293478  
6,2,1897.605769  
6,2,13301.648936  
6,2,1716.625000  
6,2,3248.114796  
6,2,2077.671512  
6,2,1564.750000  
6,2,4410.980769  
6,2,2891.500000  
6,2,1643.141892  
6,2,2999.440217  
6,2,3072.617318  
6,2,3734.156250  
6,2,1880.951087  
6,2,3339.225000  
6,2,1632.465909  
6,2,2186.421053  
6,2,3095.698020  
6,2,1842.477528  
6,2,2432.905556  
6,2,7493.794811  
6,2,5786.656863  
6,2,3333.157609  
6,2,4275.535294  
6,2,4480.482558  
6,2,3083.492188  
6,2,2076.476190  
6,2,3210.041667  
6,2,3760.770833  
6,2,4900.742515

6,2,2458.150685  
6,2,2453.782051  
6,2,1783.763158  
6,2,3608.733108  
6,2,1773.582500  
6,2,1642.278846  
6,2,4492.565789  
6,2,3101.658537  
6,2,2000.484375  
6,2,8571.437500  
6,2,5009.095890  
6,2,1987.443182  
6,2,3874.895480  
6,2,8023.390625  
6,2,2623.280105  
6,2,6148.464286  
6,2,1667.750000  
6,2,5230.510000  
6,2,1993.803977  
6,2,3165.393293  
6,2,5486.140625  
6,2,1924.755682  
6,2,7872.648936  
6,2,5385.597222  
6,2,2728.159236  
6,2,2231.206250  
6,2,2672.646875  
6,2,2006.385965  
6,2,2476.757576  
6,2,3504.420455  
6,2,2226.500000  
6,2,6758.994792  
6,2,2172.337079  
6,2,5671.919786  
6,2,3544.601485  
6,2,3494.317500  
6,2,2898.377778  
6,2,3373.000000  
6,2,3935.602041  
6,2,1892.898438  
6,2,4108.240385  
6,2,1563.561047  
6,2,3464.710938  
6,2,3940.407143  
6,2,6329.687500  
6,2,6431.612805  
6,2,1934.174419  
6,2,1766.037791  
6,2,2138.087302  
6,2,3833.230769  
6,2,7611.585366  
6,2,2603.047619  
6,2,1637.431373  
6,2,2144.395349  
6,2,5888.250000  
6,2,3878.421053  
6,2,4617.500000  
6,2,1969.846939  
6,2,2202.689024  
6,2,2129.476351  
6,2,1621.130208  
6,2,1987.513514  
6,2,1511.505263  
6,2,3134.168421  
6,2,5588.963542  
6,2,3815.760000

6,2,3112.545455  
6,2,3329.227564  
6,2,3344.361111  
6,2,4026.601351  
6,2,2682.597500  
6,2,2005.304878  
6,2,2016.155000  
6,2,1744.812500  
6,2,2325.675676  
6,2,1973.732143  
6,2,1665.924479  
6,2,2475.262821  
6,2,6097.913043  
6,2,3918.682927  
6,2,1660.676829  
6,2,3932.182927  
6,2,6297.303125  
6,2,6931.441667  
6,2,1779.000000  
6,2,2402.104167  
6,2,4593.506944  
6,2,1636.846875  
6,2,2046.644737  
6,2,2316.500000  
6,2,2643.300781  
6,2,2078.096939  
6,2,7628.850000  
6,2,2148.868902  
6,2,4204.675676  
6,2,5524.504717  
6,2,2078.122845  
6,2,1990.695455  
6,2,7653.839286  
6,2,2509.642857  
6,2,12127.000000  
6,2,8443.443396  
6,2,2887.551282  
6,2,5667.671512  
6,2,2184.191489  
6,2,2477.029557  
6,2,2623.051829  
6,2,3476.072500  
6,2,5097.633333  
6,2,1540.731250  
6,2,3733.302326  
6,2,2477.130000  
6,2,4375.061538  
6,2,2518.300000  
6,2,3705.063953  
6,2,1879.625000  
6,2,3840.513158  
6,2,2218.877778  
6,2,4183.979167  
6,2,2313.580645  
6,2,7597.250000  
6,2,1971.870968  
6,2,1563.719178  
6,2,4216.943878  
6,2,9603.648649  
6,2,5317.553571  
6,2,2440.425000  
6,2,4327.702128  
6,2,4638.928191  
6,2,2866.418367  
6,2,2732.899441  
6,2,2796.139037

6,2,2194.744681  
6,2,2267.302139  
6,2,2498.670732  
6,2,1917.541860  
6,2,5535.743902  
6,2,6595.442500  
6,2,3215.439024  
6,2,2424.107639  
6,2,5049.654440  
6,2,1773.312500  
6,2,3300.494186  
6,2,4594.014151  
6,2,3916.488636  
6,2,1916.847059  
6,2,1814.821429  
6,2,4596.806452  
6,2,16584.361111  
6,2,2259.192857  
6,2,2445.433140  
6,2,1693.861842  
6,2,2793.462500  
6,2,2488.941176  
6,2,2984.750000  
6,2,2954.024390  
6,2,5025.081250  
6,2,9389.375000  
6,2,4010.816860  
6,2,4123.041667  
6,2,6528.435484  
6,2,2950.121622  
6,2,2498.888889  
6,2,3681.047619  
6,2,2273.937500  
6,2,1904.796875  
6,2,4509.383721  
6,2,1642.209375  
6,2,4987.821429  
6,2,1609.595930  
6,2,4429.273438  
6,2,2051.048077  
6,2,1961.255102  
6,2,1697.798780  
6,2,4916.010000  
6,2,5003.904891  
6,2,2620.604167  
6,2,1844.585366  
6,2,2123.202454  
6,2,3052.806604  
6,2,2269.143750  
6,2,3724.451705  
6,2,2446.500000  
6,2,4278.096591  
6,2,2017.134146  
6,2,4871.814286  
6,2,2740.186047  
6,2,2138.145349  
6,2,4840.371951  
6,2,3289.892857  
6,2,1683.891304  
6,2,3904.473558  
6,2,69835.721429  
6,2,6548.371795  
6,2,6993.931818  
6,2,6421.781977  
6,2,5455.027027  
6,2,2323.831633

6,2,2766.229167  
6,2,1833.976190  
6,2,11113.136364  
6,2,1529.105263  
6,2,4856.616071  
6,2,2065.441489  
6,2,2151.700000  
6,2,4484.062500  
6,2,3633.312500  
6,2,5367.653846  
6,2,1511.073864  
6,2,3051.091216  
6,2,1989.738372  
6,2,5349.977941  
6,2,2015.679487  
6,2,2004.331250  
6,2,2612.209375  
6,2,1641.924419  
6,2,1651.896226  
6,2,1720.707547  
6,2,5042.023256  
6,2,6217.417553  
6,2,3228.862069  
6,2,4224.815789  
6,2,2719.228571  
6,2,11687.575758  
6,2,1834.547297  
6,2,1823.000000  
6,2,4008.061798  
6,2,1635.640244  
6,2,2333.996528  
6,2,1790.217391  
6,2,2363.663462  
6,2,1924.934524  
6,2,7952.087500  
6,2,3018.362500  
6,2,12918.196262  
6,2,3736.123457  
6,2,4102.666667  
6,2,2069.961735  
6,2,2156.250000  
6,2,2816.256579  
6,2,14298.875000  
6,2,2412.350000  
6,2,2036.735714  
6,2,12264.741206  
6,2,3440.596154  
6,2,3595.212264  
6,2,1574.241667  
6,2,5746.985849  
6,2,3455.692308  
6,2,2323.067308  
6,2,3878.990385  
6,2,9161.526042  
6,2,5298.300481  
6,2,2432.037500  
6,2,2785.071429  
6,2,7393.307692  
6,2,2115.421875  
6,2,3972.235294  
6,2,6099.949324  
6,2,11822.557377  
6,2,4245.090909  
6,2,3041.646341  
6,2,1912.705128  
6,2,1690.619048

6,2,1792.524390  
6,2,2031.806818  
6,2,3701.500000  
6,2,2634.216667  
6,2,3037.835227  
6,2,1545.792453  
6,2,2127.560976  
6,2,1719.596154  
6,2,1925.519022  
6,2,2256.000000  
6,2,7269.362069  
6,2,2462.009868  
6,2,7513.000000  
6,2,15240.946023  
6,2,1796.207831  
6,2,2122.500000  
6,2,12933.925466  
6,2,3643.148438  
6,2,2080.179104  
6,2,4060.532051  
6,2,2790.283784  
6,2,1687.218750  
6,2,5672.765957  
6,2,6021.184322  
6,2,1733.125000  
6,2,1755.300000  
6,2,3760.544271  
6,2,2335.718750  
6,2,6553.580882  
6,2,2921.968750  
6,2,10046.976562  
6,2,4882.866667  
6,2,6276.307692  
6,2,3429.686111  
6,2,1539.493865  
6,2,1903.070513  
6,2,2396.386740  
6,2,2588.275000  
6,2,1550.408163  
6,2,1904.521875  
6,2,3574.666667  
6,2,2493.404255  
6,2,1521.231707  
6,2,5443.459184  
6,2,4678.358974  
6,2,3389.442308  
6,2,4346.732143  
6,2,6871.678879  
6,2,4697.884804  
6,2,8191.625000  
6,2,5127.037500  
6,2,1753.010135  
6,2,8754.323529  
6,2,1829.890625  
6,2,2403.837500  
6,2,3008.737500  
6,2,3425.875000  
6,2,5168.500000  
6,2,2206.471591  
6,2,6051.683333  
6,2,4096.336538  
6,2,5784.435897  
6,2,3234.412234  
6,2,14650.644444  
6,2,1976.178571  
6,2,1690.511364

6,2,4825.469828  
6,2,1899.982955  
6,2,1921.125000  
6,2,3284.926829  
6,2,3773.531250  
6,2,3180.970109  
6,2,5527.468750  
6,2,1909.727273  
6,2,2573.184211  
6,2,1543.406250  
6,2,16482.384615  
6,2,3506.213235  
6,2,5503.458333  
6,2,3276.098214  
6,2,1742.154412  
6,2,4713.593407  
6,2,4747.329545  
6,2,7755.284314  
6,2,7644.122093  
6,2,12699.263889  
6,2,6878.883721  
6,2,2712.367347  
6,2,1878.357143  
6,2,2229.642442  
6,2,5315.573370  
6,2,1504.047486  
6,2,9534.505814  
6,2,4691.308511  
6,2,2416.125000  
6,2,6506.125000  
6,2,5993.093023  
6,2,3548.970238  
6,2,3865.000000  
6,2,2535.786885  
6,2,2237.705882  
6,2,2350.750000  
6,2,1749.086957  
6,2,3826.081633  
6,2,4538.437500  
6,2,3391.018293  
6,2,4956.465000  
6,2,4397.597826  
6,2,4973.535714  
6,2,3377.906250  
6,2,1752.625000  
6,2,5984.596154  
6,2,1539.432292  
6,2,10645.543367  
6,2,2795.894231  
6,2,6424.240000  
6,2,1753.982558  
6,2,3514.890244  
6,2,2794.422222  
6,2,20540.003472  
6,2,4228.181818  
6,2,2304.246711  
6,2,4870.700000  
6,2,3000.282895  
6,2,2389.921053  
6,2,3214.000000  
6,2,4832.666667  
6,2,2076.842262  
6,2,1808.859375  
6,2,7469.666667  
6,2,3540.693182  
6,2,5748.000000

6,2,2286.394022  
6,2,3251.183333  
6,2,2389.765625  
6,2,5510.117188  
6,2,3459.799020  
6,2,2384.298780  
6,2,2749.256579  
6,2,5121.422872  
6,2,6867.517045  
6,2,3993.953125  
6,2,6968.176887  
6,2,2801.500000  
6,2,1976.723404  
6,2,8297.776536  
6,2,2121.114796  
6,2,1703.004630  
6,2,2734.035000  
6,2,1585.805556  
6,2,1622.442073  
6,2,1992.425595  
6,2,2688.741848  
6,2,6698.389535  
6,2,1890.839286  
6,2,2693.652174  
6,2,1656.370098  
6,2,11948.642857  
6,2,3765.329545  
6,2,4083.677632  
6,2,3247.837500  
6,2,4688.811047  
6,2,1629.273936  
6,2,2505.344828  
6,2,2161.411765  
6,2,5732.752841  
6,2,2398.927885  
6,2,12576.878049  
6,2,4938.416667  
6,2,1542.707500  
6,2,2188.082317  
6,2,6434.731844  
6,2,2298.751479  
6,2,2247.523810  
6,2,3472.656915  
6,2,1876.541872  
6,2,2273.214286  
6,2,2005.444444  
6,2,6416.930233  
6,2,2471.226744  
6,2,4720.568182  
6,2,6841.781818  
6,2,4192.532895  
6,2,4145.416667  
6,2,4914.397727  
6,2,2272.021739  
6,2,1733.323529  
6,2,2270.326087  
6,2,1635.151163  
6,2,2637.454545  
6,2,2188.500000  
6,2,2983.076087  
6,2,1578.209239  
6,2,2400.977273  
6,2,1895.166667  
6,2,9284.254464  
6,2,2695.000000  
6,2,2722.486911

6,2,4077.357955  
6,2,1533.658163  
6,2,5072.750000  
6,2,2080.528125  
6,2,2731.053571  
6,2,4245.690000  
6,2,2306.526786  
6,2,2142.058140  
6,2,7053.450000  
6,2,2165.682292  
6,2,11336.322917  
6,2,1658.252841  
6,2,2652.308333  
6,2,1646.045455  
6,2,7623.704545  
6,2,2123.093750  
6,2,1780.738636  
6,2,9052.090909  
6,2,14263.775000  
6,2,2775.708333  
6,2,2166.728261  
6,2,8521.750000  
6,2,2915.153846  
6,2,1953.375000  
6,2,6517.477500  
6,2,1635.602778  
6,2,3411.907407  
6,2,9194.513889  
6,2,2160.581522  
6,2,2482.863372  
6,2,5013.055556  
6,2,7581.293750  
6,2,2698.473684  
6,2,5244.256757  
6,2,12437.330189  
6,2,1780.630952  
6,2,2673.630682  
6,2,2555.034091  
6,2,5450.190909  
6,2,3176.562500  
6,2,2842.325000  
6,2,6282.189474  
6,2,4015.415865  
6,2,2494.832335  
6,2,7293.630137  
6,2,2477.784314  
6,2,1550.575581  
6,2,2468.720238  
6,2,1944.256579  
6,2,3461.200581  
6,2,5865.500000  
6,2,2066.993976  
6,2,2239.943925  
6,2,2707.687500  
6,2,2999.212500  
6,2,2160.473214  
6,2,4334.170732  
6,2,1755.489362  
6,2,2242.651163  
6,2,1823.670455  
6,2,4223.012821  
6,2,3665.641304  
6,2,2296.380952  
6,2,1680.471774  
6,2,2279.007812  
6,2,2101.131098

6,2,1674.432432  
6,2,2368.632979  
6,2,1651.620253  
6,2,2883.948276  
6,2,2014.984043  
6,2,3990.547297  
6,2,1646.225962  
6,2,2646.064103  
6,2,3484.436224  
6,2,1661.909091  
6,2,13602.654255  
6,2,7158.750000  
6,2,3168.750000  
6,2,3068.296875  
6,2,2690.882979  
6,2,9432.127500  
6,2,2045.546053  
6,2,1683.671875  
6,2,3692.665094  
6,2,4229.747396  
6,2,1641.713068  
6,2,1902.692857  
6,2,3004.365385  
6,2,1667.782738  
6,2,1573.332237  
6,2,2265.739362  
6,2,2106.297546  
6,2,1839.354167  
6,2,3992.046196  
6,2,1764.887500  
6,2,1897.698171  
6,2,3075.010417  
6,2,3850.695122  
6,2,9250.946429  
6,2,7870.702128  
6,2,2111.767442  
6,2,4253.307692  
6,2,7306.562500  
6,2,12249.737805  
6,2,2952.048077  
6,2,5172.888636  
6,2,2345.281250  
6,2,6857.913043  
6,2,2526.643258  
6,2,2404.333333  
6,2,2139.289474  
6,2,3206.812500  
6,2,2886.324324  
6,2,4983.742647  
6,2,4217.017045  
6,2,2829.134146  
6,2,3646.227273  
6,2,9750.183673  
6,2,10299.473684  
6,2,8422.000000  
6,2,3316.528409  
6,2,9943.722222  
6,2,1617.887931  
6,2,1771.229730  
6,2,4384.607914  
6,2,2426.405488  
6,2,5673.617021  
6,2,3213.617647  
6,2,1994.252604  
6,2,1917.888298  
6,2,5418.894737

6,2,2896.111111  
6,2,1567.769231  
6,2,3331.218750  
6,2,3332.250000  
6,2,7291.402542  
6,2,1511.777778  
6,2,4026.497549  
6,2,10064.358491  
6,2,2785.832447  
6,2,2855.129464  
6,2,7169.592391  
6,2,2080.208333  
6,2,1542.479730  
6,2,4115.309524  
6,2,3222.505263  
6,2,6861.250000  
6,2,2678.604651  
6,2,6513.735294  
6,2,1814.200000  
6,2,2208.778409  
6,2,3358.512821  
6,2,3734.326923  
6,2,6009.400000  
6,2,4648.670673  
6,2,2255.710227  
6,2,5859.627907  
6,2,2029.011628  
6,2,2093.000000  
6,2,4992.483696  
6,2,4987.220588  
6,2,2263.133333  
6,2,11924.010526  
6,2,4936.555556  
6,2,1780.785714  
6,2,1596.230769  
6,2,1703.250000  
6,2,6571.015625  
6,2,4250.208333  
6,2,4013.974432  
6,2,2596.092105  
6,2,2639.113208  
6,2,4931.632812  
6,2,2166.461538  
6,2,4586.357143  
6,2,5211.857143  
6,2,1700.048077  
6,2,1633.220588  
6,2,4269.967391  
6,2,1731.952273  
6,2,4293.384615  
6,2,15081.384615  
6,2,4802.224390  
6,2,2066.190217  
6,2,1656.388889  
6,2,5237.055556  
6,2,1759.601351  
6,2,1869.597222  
6,2,2018.000000  
6,2,4900.175000  
6,2,2361.266304  
6,2,5565.812500  
6,2,3946.900000  
6,2,3886.723837  
6,2,4757.994898  
6,2,3358.013158  
6,2,3704.531250

6,2,2388.104651  
6,2,1672.307692  
6,2,3892.476974  
6,2,1852.384615  
6,2,1998.684783  
6,2,1718.641026  
6,2,2219.767857  
6,2,2540.107143  
6,2,2748.823810  
6,2,1584.678571  
6,2,2689.160256  
6,2,1660.768868  
6,2,2458.002778  
6,2,3607.500000  
6,2,2724.942177  
6,2,2214.452500  
6,2,2909.366279  
6,2,1520.824324  
6,2,7191.233333  
6,2,1616.929936  
6,2,13884.819149  
6,2,3529.023256  
6,2,4701.000000  
6,2,4554.478659  
6,2,9948.242925  
6,2,1651.842105  
6,2,13929.890957  
6,2,2270.658019  
6,2,4776.245098  
6,2,1718.826087  
6,2,4605.383929  
6,2,2539.532609  
6,2,1544.709459  
6,2,5694.818182  
6,2,2928.021739  
6,2,3849.250000  
6,2,2471.009868  
6,2,1508.590426  
6,2,2251.045455  
6,2,4124.553191  
6,2,12901.880208  
6,2,1575.125000  
6,2,3653.100000  
6,2,6648.750000  
6,2,1692.239264  
6,2,3662.222222  
6,2,2264.305851  
6,2,6976.363636  
6,2,1724.318452  
6,2,1622.142857  
6,2,14334.902439  
6,2,3159.024457  
6,2,3133.137931  
6,2,4608.459906  
6,2,2678.837209  
6,2,4131.235119  
6,2,1643.828571  
6,2,2576.089286  
6,2,7180.490625  
6,2,2529.625000  
6,2,7615.153846  
6,2,2337.257485  
6,2,2110.976064  
6,2,1650.571429  
6,2,4443.523305  
6,2,3685.500000

6,2,2062.555851  
6,2,3171.040323  
6,2,5158.304688  
6,2,2291.833333  
6,2,1742.844444  
6,2,1709.794286  
6,2,1695.723837  
6,2,18996.337500  
6,2,3537.715909  
6,2,4713.375839  
6,2,3551.472561  
6,2,2561.150000  
6,2,7749.562500  
6,2,8098.455128  
6,2,2024.458333  
6,2,2194.838068  
6,2,6818.087500  
6,2,2887.500000  
6,2,3116.420455  
6,2,1734.344444  
6,2,1510.795455  
6,2,3731.215909  
6,2,2697.850877  
6,2,2954.470109  
6,2,3977.886364  
6,2,1538.338710  
6,2,5268.168269  
6,2,2315.520833  
6,2,2730.430233  
6,2,6149.714286  
6,2,3654.161290  
6,2,1976.907895  
6,2,1854.200000  
6,2,1610.115385  
6,2,2006.583333  
6,2,2295.575000  
6,2,2338.278302  
6,2,6127.782609  
6,2,2804.312500  
6,2,5389.315789  
6,2,5975.640704  
6,2,2807.731250  
6,2,1779.762570  
6,2,16006.366667  
6,2,1926.301630  
6,2,3091.060096  
6,2,2293.400000  
6,2,14296.141667  
6,2,1987.601064  
6,2,1614.714286  
6,2,4393.821429  
6,2,2504.728643  
6,2,2956.165094  
6,2,2334.537500  
6,2,14120.078740  
6,2,4452.698324  
6,2,9407.650510  
6,2,5362.420455  
6,2,2267.089109  
6,2,10294.944444  
6,2,4002.425000  
6,2,3394.524390  
6,2,1686.215232  
6,2,5419.513514  
6,2,14821.022727  
6,2,5143.275000

6,2,8101.480000  
6,2,1661.054054  
6,2,2168.148936  
6,2,2104.236486  
6,2,1703.758929  
6,2,2163.668269  
6,2,4160.411111  
6,2,3128.096939  
6,2,2325.766667  
6,2,1710.061798  
6,2,2024.280488  
6,2,2676.750000  
6,2,6309.004098  
6,2,1596.578616  
6,2,4372.483696  
6,2,4364.500000  
6,2,15915.518868  
6,2,1789.971591  
6,2,3577.505051  
6,2,4711.912791  
6,2,1742.682432  
6,2,4347.928571  
6,2,20775.871429  
6,2,1734.471698  
6,2,4522.642857  
6,2,4386.075000  
6,2,4050.666667  
6,2,3103.161458  
6,2,2304.359375  
6,2,2480.766010  
6,2,2951.890957  
6,2,1998.204545  
6,2,8188.090909  
6,2,3217.861111  
6,2,16850.928879  
6,2,3565.089286  
6,2,2265.020833  
6,2,3400.560000  
6,2,4003.208333  
6,2,3069.641026  
6,2,2772.000000  
6,2,1840.430556  
6,2,2588.521739  
6,2,3622.630435  
6,2,1996.384615  
6,2,2465.284091  
6,2,4308.630435  
6,2,2777.651852  
6,2,1525.861702  
6,2,14717.942308  
6,2,14800.762255  
6,2,2444.134146  
6,2,1967.948370  
6,2,1654.511628  
6,2,1857.046512  
6,2,2094.574468  
6,2,1626.197727  
6,2,7737.397338  
6,2,18292.285714  
6,2,3244.160000  
6,2,3808.403141  
6,2,2666.961957  
6,2,3924.472222  
6,2,4461.934783  
6,2,2382.809028  
6,2,4310.964744

6,2,7439.285714  
6,2,7782.458333  
6,2,1631.777778  
6,2,6927.945876  
6,2,1689.174419  
6,2,2408.214286  
6,2,1918.839286  
6,2,2384.968750  
6,2,11159.652027  
6,2,6274.156250  
6,2,5133.843750  
6,2,3637.828571  
6,2,2391.343750  
6,2,8316.750000  
6,2,2000.164557  
6,2,4399.070312  
6,2,2641.489796  
6,2,15553.347826  
6,2,1883.344444  
6,2,3153.645349  
6,2,1857.556604  
6,2,4451.375000  
6,2,1880.729839  
6,2,3771.155488  
6,2,5651.298507  
6,2,1750.416667  
6,2,2892.684783  
6,2,2606.107843  
6,2,3539.310606  
6,2,2285.398649  
6,2,5438.050439  
6,2,4205.648936  
6,2,1687.209581  
6,2,2302.043750  
6,2,3326.472222  
6,2,2270.953125  
6,2,7294.920455  
6,2,7343.112903  
6,2,2273.583333  
6,2,17660.392857  
6,2,3334.890625  
6,2,2490.750000  
6,2,2125.403846  
6,2,1510.438889  
6,2,21383.089286  
6,2,5575.959239  
6,2,11242.812500  
6,2,2887.801282  
6,2,1797.649194  
6,2,1656.494792  
6,2,6321.567708  
6,2,4582.052632  
6,2,2238.330189  
6,2,3722.860795  
6,2,1735.750000  
6,2,1806.131696  
6,2,1821.435714  
6,2,2138.428571  
6,2,2229.821429  
6,2,5981.850000  
6,2,7717.605263  
6,2,2468.043478  
6,2,4259.937500  
6,2,5342.566964  
6,2,3348.000000  
6,2,4106.081731

6,2,4609.192308  
6,2,4728.355114  
6,2,1592.397661  
6,2,4668.011628  
6,2,6032.084906  
6,2,2297.321429  
6,2,2895.800000  
6,2,3258.531250  
6,2,5811.979730  
6,2,1986.662088  
6,2,3084.500000  
6,2,6292.404891  
6,2,2430.334459  
6,2,6056.162562  
6,2,5436.196721  
6,2,2087.492147  
6,2,1589.054878  
6,2,2315.506944  
6,2,1904.210526  
6,2,3591.013966  
6,2,1728.842105  
6,2,1558.829268  
6,2,6173.540000  
6,2,6418.319767  
6,2,9298.840116  
6,2,3281.819915  
6,2,2598.115854  
6,2,3710.744792  
6,2,7471.086538  
6,2,4228.625000  
6,2,2989.392857  
6,2,6627.343023  
6,2,1503.519231  
6,2,2977.564516  
6,2,7526.639205  
6,2,3694.051282  
6,2,4963.098639  
6,2,1983.070513  
6,2,2037.040000  
6,2,2175.900552  
6,2,2767.525641  
6,2,3044.038217  
6,2,2085.899329  
6,2,13350.538462  
6,2,2607.847500  
6,2,1876.638298  
6,2,5156.673913  
6,2,3897.687500  
6,2,4655.900000  
6,2,2978.541667  
6,2,20104.262712  
6,2,2626.545455  
6,2,2435.857143  
6,2,3953.458333  
6,2,3947.956284  
6,2,3642.754808  
6,2,2011.902542  
6,2,4424.225962  
6,2,4171.225000  
6,2,38559.895833  
6,2,2288.126316  
6,2,3834.288660  
6,2,2429.417553  
6,2,10250.437500  
6,2,1874.845395  
6,2,10053.259259

6,2,31152.709877  
6,2,2496.569444  
6,2,2569.073171  
6,2,2240.185714  
6,2,4239.555556  
6,2,1507.882812  
6,2,1688.661765  
6,2,1855.461538  
6,2,4866.671875  
6,2,5137.601744  
6,2,3560.816327  
6,2,2227.734043  
6,2,2719.858333  
6,2,2758.985795  
6,2,5395.527094  
6,2,2071.408537  
6,2,2967.370690  
6,2,7758.920000  
6,2,1816.474490  
6,2,1801.266892  
6,2,5051.673913  
6,2,6537.649038  
6,2,4434.441860  
6,2,4970.523810  
6,2,1578.375000  
6,2,4628.377551  
6,2,3349.414894  
6,2,2872.083333  
6,2,3822.397059  
6,2,1547.875000  
6,2,1527.858434  
6,2,2787.983553  
6,2,3629.427885  
6,2,4435.259615  
6,2,3399.585903  
6,2,1754.718023  
6,2,3524.134615  
6,2,5829.746875  
6,2,1893.768293  
6,2,1896.966667  
6,2,2589.827815  
6,2,2735.064103  
6,2,2600.428571  
6,2,3977.067308  
6,2,1620.828947  
6,2,2265.938830  
6,2,7823.645833  
6,2,1559.012500  
6,2,1892.848684  
6,2,4413.522222  
6,2,4372.425000  
6,2,1775.775862  
6,2,9300.027778  
6,2,5869.097561  
6,2,2216.818182  
6,2,2934.400000  
6,2,2774.098837  
6,2,1702.768293  
6,2,2466.194444  
6,2,2140.127551  
6,2,4915.305328  
6,2,3880.400000  
6,2,1817.910714  
6,2,2009.878205  
6,2,1811.907895  
6,2,2063.281250

6,2,1549.914634  
6,2,1683.597826  
6,2,8717.027778  
6,2,5611.101974  
6,2,2071.736842  
6,2,2824.500000  
6,2,2236.777439  
6,2,4598.802632  
6,2,2157.860294  
6,2,3990.680851  
6,2,1884.350000  
6,2,2024.761574  
6,2,5935.750000  
6,2,1507.369565  
6,2,2998.384615  
6,2,4712.864130  
6,2,5012.165761  
6,2,2425.625000  
6,2,2866.320000  
6,2,1921.686275  
6,2,4338.360000  
6,2,3819.323171  
6,2,2245.088889  
6,2,2029.450000  
6,2,6412.397059  
6,2,4219.363636  
6,2,1777.931373  
6,2,4564.298295  
6,2,2164.753012  
6,2,8243.534091  
6,2,1570.625000  
6,2,1663.481250  
6,2,2356.756098  
6,2,2919.842105  
6,2,5280.825000  
6,2,2793.559375  
6,2,1839.965000  
6,2,2203.459302  
6,2,31130.884146  
6,2,7347.346154  
6,2,1612.472603  
6,2,1875.053191  
6,2,3184.710000  
6,2,6572.278646  
6,2,1680.658163  
6,2,1823.602041  
6,2,6412.068452  
6,2,1532.421053  
6,2,1698.329268  
6,2,5833.411290  
6,2,3430.013889  
6,2,1591.685000  
6,2,1630.851974  
6,2,7030.727273  
6,2,5288.136364  
6,2,3376.308673  
6,2,2029.857143  
6,2,2556.632812  
6,2,1588.675676  
6,2,4575.015625  
6,2,10952.610465  
6,2,4186.288945  
6,2,4632.812500  
6,2,3244.651042  
6,2,4766.966667  
6,2,1599.410256

6,2,7871.641447  
6,2,1744.866667  
6,2,2423.324561  
6,2,5817.891429  
6,2,2531.358639  
6,2,6291.630000  
6,2,7820.217262  
6,2,2122.054348  
6,2,1709.004854  
6,2,1658.392857  
6,2,5854.312500  
6,2,2927.890625  
6,2,2317.487245  
6,2,1944.538043  
6,2,3762.296512  
6,2,16247.071429  
6,2,8798.234375  
6,2,7127.115000  
6,2,1765.617021  
6,2,1956.653061  
6,2,3523.594286  
6,2,2141.710526  
6,2,2627.620000  
6,2,2792.240741  
6,2,1572.940217  
6,2,2003.253049  
6,2,3926.046875  
6,2,2039.916667  
6,2,1632.785714  
6,2,2177.204082  
6,2,13371.421053  
6,2,3569.106618  
6,2,1817.234375  
6,2,2503.855769  
6,2,6023.463415  
6,2,11586.539216  
6,2,3989.988095  
6,2,2374.141304  
6,2,5055.125000  
6,2,2710.250000  
6,2,1530.551471  
6,2,1934.973214  
6,2,3779.685096  
6,2,1991.902174  
6,2,2741.107143  
6,2,4353.800781  
6,2,2582.848837  
6,2,2036.101852  
6,2,2551.074866  
6,2,5978.819079  
6,2,7010.858696  
6,2,2464.595238  
6,2,1672.056373  
6,2,1922.723837  
6,2,1884.923913  
6,2,161580.512755  
6,2,1972.895833  
6,2,2129.785714  
6,2,2481.359043  
6,2,3260.548780  
6,2,1984.973822  
6,2,1974.891626  
6,2,2001.139706  
6,2,2760.363636  
6,2,1606.312500  
6,2,4545.705882

6,2,2207.821429  
6,2,2243.681250  
6,2,3117.625000  
6,2,3344.673469  
6,2,5708.330882  
6,2,1708.200000  
6,2,1964.744681  
6,2,1717.601744  
6,2,1507.825000  
6,2,1654.462963  
6,2,1696.424699  
6,2,3028.358696  
6,2,7673.767241  
6,2,3580.814815  
6,2,3499.716667  
6,2,1776.946809  
6,2,2550.060976  
6,2,23948.238636  
6,2,3751.075000  
6,2,2521.687500  
6,2,4610.162736  
6,2,3404.847500  
6,2,2785.278846  
6,2,3435.493902  
6,2,2945.320652  
6,2,3809.728365  
6,2,8412.526316  
6,2,1569.220930  
6,2,3249.357143  
6,2,5408.400000  
6,2,2807.310811  
6,2,2706.558824  
6,2,3585.773585  
6,2,3223.400000  
6,2,1852.463068  
6,2,2537.480769  
6,2,1536.058511  
6,2,3816.142857  
6,2,1600.418919  
6,2,2361.654255  
6,2,2746.044444  
6,2,2011.066845  
6,2,3622.970000  
6,2,3275.611429  
6,2,2244.362500  
6,2,2296.634615  
6,2,5962.086310  
6,2,2379.847561  
6,2,1519.715625  
6,2,2809.000000  
6,2,3001.250000  
6,2,4802.869318  
6,2,2135.658537  
6,2,1591.177419  
6,2,4794.752907  
6,2,2277.658537  
6,2,1610.637500  
6,2,3016.959184  
6,2,6692.281250  
6,2,2235.496875  
6,2,1746.370536  
6,2,3719.076923  
6,2,6107.046875  
6,2,5371.715426  
6,2,15723.684211  
6,2,3619.958333

6,2,13579.197674  
6,2,4246.110465  
6,2,3224.900641  
6,2,8871.252451  
6,2,4171.739583  
6,2,2074.756250  
6,2,2139.415663  
6,2,1894.178082  
6,2,3627.744681  
6,2,1662.849432  
6,2,1793.022346  
6,2,11102.850000  
6,2,6055.035928  
6,2,2514.850000  
6,2,6621.575758  
6,2,1736.224432  
6,2,5242.710366  
6,2,1530.454787  
6,2,2575.243902  
6,2,1712.347222  
6,2,2069.055046  
6,2,5042.684896  
6,2,3751.759615  
6,2,2449.267857  
6,2,2885.343750  
6,2,4266.496429  
6,2,6115.546512  
6,2,2442.038462  
6,2,3586.620000  
6,2,1740.330189  
6,2,2870.500000  
6,2,6220.591463  
6,2,2048.250000  
6,2,1640.863095  
6,2,1720.627907  
6,2,2349.535484  
6,2,3720.323370  
6,2,3650.811224  
6,2,7033.217105  
6,2,1774.409722  
6,2,2154.742188  
6,2,9829.301587  
6,2,1777.951389  
6,2,4967.518692  
6,2,5018.696429  
6,2,2949.566489  
6,2,2937.720238  
6,2,2859.337209  
6,2,3063.827586  
6,2,6031.052632  
6,2,6884.408333  
6,2,13749.614407  
6,2,1552.557692  
6,2,3756.061047  
6,2,1745.515625  
6,2,5673.333333  
6,2,3347.785714  
6,2,6195.229358  
6,2,196635.837004  
6,2,5571.895210  
6,2,2992.785714  
6,2,2412.000000  
6,2,6869.665541  
6,2,3318.718750  
6,2,3136.454545  
6,2,2479.671429

6,2,1968.550595  
6,2,2813.510000  
6,2,2213.445000  
6,2,7312.173913  
6,2,1854.388158  
6,2,2287.103352  
6,2,2744.706806  
6,2,11496.034091  
6,2,2286.491667  
6,2,2426.900510  
6,2,2202.928571  
6,2,5094.608333  
6,2,2939.671875  
6,2,2404.678571  
6,2,1990.812500  
6,2,6082.860000  
6,2,2540.367021  
6,2,5309.614362  
6,2,2385.882653  
6,2,4942.703125  
6,2,2783.005102  
6,2,1702.244318  
6,2,1901.286164  
6,2,3603.994318  
6,2,3008.111702  
6,2,3266.918919  
6,2,4349.372500  
6,2,2994.975610  
6,2,7122.513158  
6,2,15210.500000  
6,2,2643.155556  
6,2,4112.733333  
6,2,5397.791667  
6,2,4743.536585  
6,2,2854.545455  
6,2,2863.411111  
6,2,3809.625000  
6,2,9581.605128  
6,2,4300.176887  
6,2,1747.238636  
6,2,1988.587500  
6,2,5562.639535  
6,2,9199.906780  
6,2,4120.337500  
6,2,20080.260870  
6,2,3306.875000  
6,2,5549.400000  
6,2,2237.954545  
6,2,1713.572222  
6,2,34972.687500  
6,2,2816.443396  
6,2,3174.656915  
6,2,2606.140000  
6,2,5663.329787  
6,2,2116.076923  
6,2,4908.406250  
6,2,4600.801630  
6,2,20771.632653  
6,2,4612.789474  
6,2,2153.419643  
6,2,4922.132850  
6,2,4102.241722  
6,2,5429.750965  
6,2,1984.875000  
6,2,5564.117647  
6,2,1592.236486

6,2,1561.821429  
6,2,2003.191176  
6,2,13584.333333  
6,2,5459.771635  
6,2,4528.872093  
6,2,1723.089286  
6,2,3942.987805  
6,2,28381.782407  
6,2,1811.812500  
6,2,5202.114865  
6,2,1695.050000  
6,2,2085.082418  
6,2,1967.415541  
6,2,1666.583333  
6,2,5699.607143  
6,2,2072.710526  
6,2,1721.679245  
6,2,5886.880435  
6,2,10030.809211  
6,2,2791.433824  
6,2,1713.382212  
6,2,2411.013889  
6,2,3271.895833  
6,2,3138.696429  
6,2,2895.112981  
6,2,2324.972222  
6,2,1547.913889  
6,2,7382.139205  
6,2,1886.352941  
6,2,2702.468023  
6,2,2937.375000  
6,2,4181.451220  
6,2,3855.991477  
6,2,2079.728261  
6,2,1702.741379  
6,2,2017.657895  
6,2,1758.888889  
6,2,2338.288889  
6,2,4634.397222  
6,2,5319.022436  
6,2,3120.265000  
6,2,1635.988372  
6,2,4946.514706  
6,2,7771.268750  
6,2,6486.717105  
6,2,2109.378378  
6,2,3907.516304  
6,2,3500.279412  
6,2,2240.341837  
6,2,2854.697674  
6,2,2080.769608  
6,2,2780.666667  
6,2,2482.090426  
6,2,7526.531250  
6,2,3841.271739  
6,2,2270.880952  
6,2,4131.207317  
6,2,2265.137755  
6,2,4366.819672  
6,2,4674.733974  
6,2,6882.926020  
6,2,4815.875000  
6,2,8072.710366  
6,2,8889.560000  
6,2,2057.140244  
6,2,3281.711111

6,2,3066.419355  
6,2,22706.803571  
6,2,2582.349206  
6,2,4731.798611  
6,2,1595.923077  
6,2,2666.514205  
6,2,4215.589286  
6,2,5663.625000  
6,2,5290.333333  
6,2,3628.718750  
6,2,1533.197368  
6,2,12226.659091  
6,2,2138.974432  
6,2,3564.310241  
6,2,8748.305921  
6,2,2145.075000  
6,2,5297.465116  
6,2,5748.811170  
6,2,5877.828571  
6,2,2922.330189  
6,2,2729.244565  
6,2,5934.700000  
6,2,2071.825000  
6,2,1617.186047  
6,2,2934.974359  
6,2,2087.928571  
6,2,1554.557065  
6,2,3281.130435  
6,2,2069.593023  
6,2,2408.000000  
6,2,1831.390625  
6,2,1890.463415  
6,2,5159.191176  
6,2,14227.013514  
6,2,2303.506250  
6,2,15632.775943  
6,2,2417.937500  
6,2,1676.400000  
6,2,4726.616279  
6,2,1811.352273  
6,2,1618.375000  
6,2,5607.638587  
6,2,1532.470745  
6,2,2274.552500  
6,2,1593.603261  
6,2,1686.750000  
6,2,11382.341040  
6,2,3486.886364  
6,2,7900.177083  
6,2,6050.531915  
6,2,2527.883152  
6,2,2101.856250  
6,2,3138.500000  
6,2,1901.978261  
6,2,11908.391304  
6,2,4393.424419  
6,2,2748.295213  
6,2,5207.750000  
6,2,2452.078947  
6,2,2106.969388  
6,2,2798.991071  
6,2,6297.843750  
6,2,2031.606383  
6,2,6986.530612  
6,2,1717.830357  
6,2,7287.156250

6,2,1780.222222  
6,2,4566.856818  
6,2,7696.648585  
6,2,4127.962500  
6,2,4242.545918  
6,2,2519.261364  
6,2,5416.722500  
6,2,4355.500000  
6,2,13519.313953  
6,2,1735.255814  
6,2,1855.233173  
6,2,3725.632979  
6,2,1593.093750  
6,2,6117.107143  
6,2,2680.804688  
6,2,4834.648148  
6,2,2509.515625  
6,2,2173.806548  
6,2,3044.381250  
6,2,2568.846154  
6,2,6211.975000  
6,2,2351.492647  
6,2,1625.261628  
6,2,4192.000000  
6,2,2301.325581  
6,2,1930.983696  
6,2,2641.720930  
6,2,11444.875000  
6,2,2730.470745  
6,2,2315.170213  
6,2,11558.113636  
6,2,2304.650000  
6,2,2210.760000  
6,2,1604.926471  
6,2,2995.945312  
6,2,1725.117021  
6,2,5688.140625  
6,2,2162.315385  
6,2,2762.717742  
6,2,3429.267045  
6,2,3266.552885  
6,2,3699.353723  
6,2,10156.468750  
6,2,7534.703125  
6,2,3567.288043  
6,2,2017.577703  
6,2,1799.523936  
6,2,2521.033654  
6,2,2425.372093  
6,2,3636.346821  
6,2,2176.565000  
6,2,5598.601974  
6,2,1554.941176  
6,2,7525.214286  
6,2,3987.773256  
6,2,6578.040000  
6,2,7176.500000  
6,2,10606.378205  
6,2,1769.325000  
6,2,2997.032609  
6,2,3201.641827  
6,2,3430.582589  
6,2,3412.300000  
6,2,1685.198980  
6,2,4579.943182  
6,2,4210.452830

6,2,16572.429448  
6,2,1615.000000  
6,2,2212.527027  
6,2,2298.790698  
6,2,3064.881944  
6,2,6844.986702  
6,2,2169.910326  
6,2,1659.692623  
6,2,6546.470588  
6,2,2212.250000  
6,2,1592.795918  
6,2,2375.177778  
6,2,1612.632353  
6,2,1705.395349  
6,2,2121.166667  
6,2,1901.205556  
6,2,3345.022727  
6,2,1667.171875  
6,2,3071.590909  
6,2,2155.617647  
6,2,3536.118644  
6,2,1583.551471  
6,2,2869.908854  
6,2,8866.000000  
6,2,2902.427632  
6,2,2239.703125  
6,2,6488.021186  
6,2,2794.605263  
6,2,1878.222222  
6,2,8169.275000  
6,2,4679.441860  
6,2,8463.765957  
6,2,5050.800000  
6,2,1963.645833  
6,2,1696.000000  
6,2,2930.010638  
6,2,1666.535714  
6,2,2151.800000  
6,2,1659.193182  
6,2,1914.298077  
6,2,1672.811224  
6,2,2524.425532  
6,2,4648.250000  
6,2,1906.918605  
6,2,2778.674419  
6,2,2181.000000  
6,2,2752.394444  
6,2,4331.048077  
6,2,6856.738372  
6,2,2146.577381  
6,2,3609.678571  
6,2,1501.447917  
6,2,3660.103659  
6,2,2782.016892  
6,2,1522.648256  
6,2,1904.395349  
6,2,13080.440909  
6,2,4175.392045  
6,2,2412.473404  
6,2,4563.550000  
6,2,2653.764706  
6,2,3105.945000  
6,2,3350.596591  
6,2,1959.269608  
6,2,3563.540179  
6,2,1876.483871

6,2,2002.558140  
6,2,7483.906250  
6,2,2297.316489  
6,2,5757.107143  
6,2,3946.763636  
6,2,3969.734756  
6,2,3062.897260  
6,2,5537.783333  
6,2,3940.424569  
6,2,1580.718750  
6,2,4940.029762  
6,2,2349.301676  
6,2,2463.351351  
6,2,3142.625000  
6,2,1777.404762  
6,2,2649.972527  
6,2,8260.196581  
6,2,3026.841837  
6,2,1519.573113  
6,2,4517.359694  
6,2,2814.075000  
6,2,3691.165094  
6,2,1949.606061  
6,2,1939.585714  
6,2,2487.448864  
6,2,6758.117021  
6,2,1774.729730  
6,2,3006.710526  
6,2,3408.314103  
6,2,5958.984756  
6,2,2392.125000  
6,2,3357.755814  
6,2,3633.500000  
6,2,2679.122449  
6,2,2388.960000  
6,2,6199.252232  
6,2,3758.679245  
6,2,2182.224490  
6,2,3852.132979  
6,2,3089.000000  
6,2,3596.809524  
6,2,3790.371257  
6,2,2003.767045  
6,2,7985.255435  
6,2,5286.283784  
6,2,1957.477273  
6,2,2134.250000  
6,2,7698.044118  
6,2,2113.761628  
6,2,10493.902778  
6,2,2257.795455  
6,2,2245.836683  
6,2,1701.994413  
6,2,6560.166667  
6,2,5966.104651  
6,2,4036.500000  
6,2,1909.338889  
6,2,2733.369565  
6,2,3686.816327  
6,2,1911.538462  
6,2,2396.703125  
6,2,1591.464286  
6,2,9098.833333  
6,2,2249.523952  
6,2,5128.322500  
6,2,2153.551020

6,2,1672.286184  
6,2,2436.773543  
6,2,4958.259434  
6,2,1578.851064  
6,2,2393.004310  
6,2,4592.446721  
6,2,2787.532895  
6,2,4516.489130  
6,2,2999.727273  
6,2,2747.370629  
6,2,189856.340314  
6,2,2072.354430  
6,2,4087.370482  
6,2,2178.500000  
6,2,5355.893617  
6,2,3207.791444  
6,2,3603.600000  
6,2,10632.914474  
6,2,2191.576220  
6,2,2005.085106  
6,2,2444.878049  
6,2,6758.125000  
6,2,2105.414474  
6,2,1623.000000  
6,2,2254.218085  
6,2,1800.181818  
6,2,3268.350000  
6,2,9428.464286  
6,2,3638.190000  
6,2,9061.439024  
6,2,2774.304245  
6,2,1548.360000  
6,2,4249.812500  
6,2,2202.636364  
6,2,4793.730769  
6,2,7505.034884  
6,2,5216.677083  
6,2,5497.727564  
6,2,10282.081967  
6,2,1788.755556  
6,2,10279.000000  
6,2,3001.666667  
6,2,4305.651163  
6,2,3540.640244  
6,2,4641.314904  
6,2,1919.000000  
6,2,4531.600000  
6,2,3821.925000  
6,2,1810.821429  
6,2,1741.000000  
6,2,10871.016129  
6,2,3649.817308  
6,2,2148.838235  
6,2,1534.851064  
6,2,2010.636029  
6,2,4005.385135  
6,2,6404.134199  
6,2,2722.125000  
6,2,8483.818182  
6,2,1589.810811  
6,2,8115.722826  
6,2,4786.333333  
6,2,6143.173913  
6,2,1811.782609  
6,2,1516.230114  
6,2,3537.877604

6,2,12666.125000  
6,2,3865.500000  
6,2,4815.024194  
6,2,1521.492462  
6,2,1579.000000  
6,2,8183.328125  
6,2,1815.564189  
6,2,1890.000000  
6,2,2043.315000  
6,2,2523.850649  
6,2,6148.727778  
6,2,4290.857143  
6,2,3644.981707  
6,2,3557.994220  
6,2,1562.435294  
6,2,4360.464497  
6,2,5145.181818  
6,2,2454.343750  
6,2,3018.197500  
6,2,2902.019022  
6,2,2790.601744  
6,2,4022.606771  
6,2,2329.473404  
6,2,4495.310976  
6,2,1668.714286  
6,2,18266.314103  
6,2,10032.953488  
6,2,2537.716667  
6,2,2788.087379  
6,2,2650.413978  
6,2,3111.444444  
6,2,1981.484375  
6,2,2689.171512  
6,2,145226.468750  
6,2,2777.981707  
6,2,2904.611111  
6,2,2093.318627  
6,2,2549.320513  
6,2,4096.673267  
6,2,2840.384146  
6,2,2019.021739  
6,2,1598.642857  
6,2,2614.387500  
6,2,2466.589286  
6,2,2171.902778  
6,2,1836.906250  
6,2,6473.853659  
6,2,1977.953488  
6,2,1649.088816  
6,2,7679.320565  
6,2,3954.881250  
6,2,3416.307692  
6,2,5047.534375  
6,2,3579.395000  
6,2,4540.122222  
6,2,2891.877778  
6,2,1539.333333  
6,2,7825.367021  
6,2,2322.750000  
6,2,5050.598684  
6,2,5655.655738  
6,2,2643.850785  
6,2,2442.376623  
6,2,2640.006757  
6,2,8690.333333  
6,2,4936.014881

6,2,4799.500000  
6,2,2194.163265  
6,2,1811.123116  
6,2,3171.219595  
6,2,2861.974684  
6,2,3505.896875  
6,2,7962.785714  
6,2,14682.125000  
6,2,6103.268868  
6,2,7299.425000  
6,2,1904.608696  
6,2,5651.897959  
6,2,4179.516892  
6,2,4454.532895  
6,2,3163.209239  
6,2,1746.701087  
6,2,2373.450000  
6,2,8332.135135  
6,2,4966.569767  
6,2,2589.100000  
6,2,3088.669271  
6,2,1815.486631  
6,2,1524.686275  
6,2,2117.632258  
6,2,1893.500000  
6,2,3292.579545  
6,2,2068.245283  
6,2,2705.000000  
6,2,3420.357143  
6,2,2314.607143  
6,2,1546.665025  
6,2,1726.582237  
6,2,1844.000000  
6,2,4658.134831  
6,2,3328.968750  
6,2,2018.666667  
6,2,16713.732955  
6,2,3062.000000  
6,2,1779.246622  
6,2,2021.146875  
6,2,1980.471591  
6,2,3160.000000  
6,2,2712.349432  
6,2,2971.736979  
6,2,5552.270833  
6,2,5957.835366  
6,2,1611.205882  
6,2,5093.375000  
6,2,2356.362500  
6,2,2986.410714  
6,2,2612.297872  
6,2,2637.597826  
6,2,6198.411111  
6,2,2027.831250  
6,2,1864.093750  
6,2,5034.591463  
6,2,2954.221154  
6,2,5774.101351  
6,2,1625.000000  
6,2,2062.166667  
6,2,2977.062500  
6,2,1925.446078  
6,2,6388.425000  
6,2,5475.535714  
6,2,1843.482843  
6,2,14135.125000

6,2,4292.650000  
6,2,4258.796875  
6,2,3461.122340  
6,2,4166.309211  
6,2,1537.500000  
6,2,2605.820513  
6,2,2208.220000  
6,2,1691.645349  
6,2,1938.552500  
6,2,5510.592105  
6,2,3015.772500  
6,2,2121.870000  
6,2,8555.000000  
6,2,4014.557692  
6,2,5661.053571  
6,2,4579.285714  
6,2,2908.916667  
6,2,2291.453571  
6,2,6270.561170  
6,2,5854.547368  
6,2,3110.137755  
6,2,3194.250000  
6,2,2811.025000  
6,2,3640.134615  
6,2,2421.828125  
6,2,1865.187500  
6,2,2043.122093  
6,2,3564.644737  
6,2,8067.505376  
6,2,1530.743243  
6,2,13962.333333  
6,2,1785.714286  
6,2,1950.294118  
6,2,2014.289062  
6,2,8838.588785  
6,2,2404.185897  
6,2,1854.652778  
6,2,4002.980978  
6,2,17392.883721  
6,2,3651.527933  
6,2,2203.975000  
6,2,1824.755814  
6,2,3719.000000  
6,2,5067.878049  
6,2,2287.003205  
6,2,1525.435897  
6,2,2376.265306  
6,2,2335.019704  
6,2,1726.845178  
6,2,1980.000000  
6,2,2579.960784  
6,2,2109.319853  
6,2,1721.288462  
6,2,3929.740385  
6,2,5564.218750  
6,2,3498.006579  
6,2,4137.800000  
6,2,1586.107143  
6,2,5020.071429  
6,2,2148.000000  
6,2,2040.639706  
6,2,2540.714674  
6,2,2023.034483  
6,2,1894.447500  
6,2,3321.681250  
6,2,3593.682065

6,2,10912.075472  
6,2,3942.925000  
6,2,2768.368902  
6,2,1533.311111  
6,2,3839.347561  
6,2,3105.235714  
6,2,14260.330357  
6,2,2090.125000  
6,2,13720.184783  
6,2,5340.308511  
6,2,2597.543478  
6,2,3005.522599  
6,2,3098.558480  
6,2,1896.250000  
6,2,3152.889706  
6,2,4365.970745  
6,2,5527.951220  
6,2,1618.074405  
6,2,2228.965909  
6,2,1590.842105  
6,2,5801.254902  
6,2,1638.022727  
6,2,1926.053922  
6,2,5024.101351  
6,2,3015.200000  
6,2,1542.735484  
6,2,1633.744681  
6,2,2254.184783  
6,2,5086.115854  
6,2,4128.000000  
6,2,1610.049383  
6,2,2454.110390  
6,2,2084.519444  
6,2,3156.027907  
6,2,1557.000000  
6,2,2644.000000  
6,2,2470.806818  
6,2,2431.218750  
6,2,1598.467391  
6,2,1796.409091  
6,2,1590.550439  
6,2,5416.850962  
6,2,4551.263514  
6,2,7214.302198  
6,2,8695.418848  
6,2,3721.807692  
6,2,3784.363426  
6,2,2680.416667  
6,2,6878.200000  
6,2,4081.002551  
6,2,3901.270440  
6,2,4911.028061  
6,2,1806.259146  
6,2,2648.835106  
6,2,3167.558673  
6,2,4158.549528  
6,2,6986.833333  
6,2,5669.355263  
6,2,3782.111702  
6,2,6849.312500  
6,2,3987.567982  
6,2,3171.794271  
6,2,39014.403302  
6,2,4115.762500  
6,2,3052.375000  
6,2,2117.546512

6,2,2220.644022  
6,2,5240.679688  
6,2,1523.921569  
6,2,10129.265086  
6,2,3253.542683  
6,2,4127.851351  
6,2,2413.026163  
6,2,42572.826389  
6,2,8146.720000  
6,2,1718.593750  
6,2,1847.100000  
6,2,4607.051020  
6,2,6391.516827  
6,2,2058.328125  
6,2,3512.894444  
6,2,7771.924528  
6,2,11028.500000  
6,2,2186.228125  
6,2,7943.984694  
6,2,2570.860119  
6,2,4047.798913  
6,2,3588.285714  
6,2,5333.122222  
6,2,2272.645408  
6,2,5193.361702  
6,2,2549.957447  
6,2,3284.262195  
6,2,3038.352564  
6,2,22480.907216  
6,2,3520.968586  
6,2,4940.092965  
6,2,1658.538462  
6,2,9438.728571  
6,2,1637.371711  
6,2,1977.500000  
6,2,3276.391667  
6,2,2538.687500  
6,2,1639.255682  
6,2,8355.956633  
6,2,1770.621849  
6,2,5154.128049  
6,2,2064.433673  
6,2,7974.760417  
6,2,8435.742187  
6,2,2256.392857  
6,2,5087.740196  
6,2,5333.414773  
6,2,1812.000000  
6,2,6858.108491  
6,2,2240.466216  
6,2,3764.083333  
6,2,2185.478365  
6,2,1636.362500  
6,2,3155.936170  
6,2,2456.368421  
6,2,4044.292683  
6,2,1586.902439  
6,2,19940.064516  
6,2,2329.784884  
6,2,8082.316176  
6,2,3130.119318  
6,2,9899.802326  
6,2,11408.206061  
6,2,2438.490625  
6,2,6804.894737  
6,2,6003.925000

6,2,2004.562500  
6,2,1510.857143  
6,2,1672.388298  
6,2,1508.661458  
6,2,5594.450000  
6,2,3035.522727  
6,2,10565.037791  
6,2,1607.411111  
6,2,3191.788889  
6,2,12453.457627  
6,2,1616.341346  
6,2,4965.948864  
6,2,8120.964912  
6,2,1509.642857  
6,2,2306.324324  
6,2,5840.225000  
6,2,1517.782609  
6,2,5599.370536  
6,2,2105.747283  
6,2,2709.106707  
6,2,2151.712500  
6,2,18114.187500  
6,2,1835.282895  
6,2,2437.869186  
6,2,4374.040323  
6,2,2577.618056  
6,2,2019.971154  
6,2,1948.095000  
6,2,5569.652439  
6,2,2827.298611  
6,2,1523.250000  
6,2,3014.390625  
6,2,18016.833333  
6,2,3451.015000  
6,2,3508.250000  
6,2,1564.360577  
6,2,2646.650000  
6,2,1859.420455  
6,2,1725.348684  
6,2,2160.105114  
6,2,3749.625000  
6,2,3227.345000  
6,2,3125.063218  
6,2,2018.940120  
6,2,2782.571429  
6,2,5101.471591  
6,2,1778.466667  
6,2,1965.482143  
6,2,2015.294118  
6,2,1631.678571  
6,2,4759.014113  
6,2,4088.434783  
6,2,2768.793478  
6,2,6916.637500  
6,2,3000.857143  
6,2,1997.283784  
6,2,1629.853659  
6,2,3143.674020  
6,2,1636.500000  
6,2,2408.625000  
6,2,1814.553571  
6,2,1678.694149  
6,2,2720.375000  
6,2,3082.908537  
6,2,2404.857143  
6,2,5860.385776

6,2,2443.015306  
6,2,1516.710526  
6,2,14266.704082  
6,2,4918.250000  
6,2,3794.113372  
6,2,3805.474432  
6,2,5490.185096  
6,2,1559.600000  
6,2,2086.210784  
6,2,6848.514286  
6,2,2854.259375  
6,2,1700.610795  
6,2,2664.372549  
6,2,5081.179688  
6,2,4581.473333  
6,2,4668.250000  
6,2,1793.704082  
6,2,2068.250000  
6,2,2717.122222  
6,2,15151.595000  
6,2,7823.568627  
6,2,2194.100000  
6,2,3260.404018  
6,2,2424.767857  
6,2,2113.989362  
6,2,6170.359043  
6,2,2688.077703  
6,2,1590.592105  
6,2,5718.368056  
6,2,5041.584270  
6,2,1537.126437  
7,1,1650.914894  
7,1,1958.006410  
7,1,52019.546196  
7,1,4301.438679  
7,1,82181.923077  
7,1,23111.908088  
7,1,18598.350543  
7,1,25035.669118  
7,1,8646.176136  
7,1,23568.844444  
7,1,3021.500000  
7,1,41547.625000  
7,1,2547.953488  
7,1,14341.702206  
7,1,2638.691860  
7,1,99638.434211  
7,1,87460.000000  
7,1,11024.632353  
7,1,38561.912500  
7,1,4583.333333  
7,1,1760.133333  
7,1,2226.250000  
7,1,2314.675000  
7,1,3069.576923  
7,1,1749.361702  
7,1,3281.329861  
7,1,5619.457447  
7,1,4556.893293  
7,1,1788.075000  
7,1,4756.571429  
7,1,3393.340909  
7,1,2645.565789  
7,1,11581.864865  
7,1,2187.649390  
7,1,2136.071809

7,1,3712.338816  
7,1,1504.511364  
7,1,1997.048295  
7,1,20028.812500  
7,1,1577.750000  
7,1,2150.878378  
7,1,3215.607955  
7,1,2509.117647  
7,1,1710.542683  
7,1,2495.855556  
7,1,2384.508333  
7,1,2070.362245  
7,1,1661.089286  
7,1,2510.128049  
7,1,1783.700000  
7,1,6063.703488  
7,1,21833.394531  
7,1,44498.631579  
7,1,2175.372549  
7,1,1669.500000  
7,1,7033.598684  
7,1,1730.325581  
7,1,131685.263298  
7,1,1511.652174  
7,1,7653.635870  
7,1,30258.394231  
7,1,2192.217391  
7,1,1878.068182  
7,1,43569.094595  
7,1,6549.477778  
7,1,2260.483871  
7,1,1945.375000  
7,1,10050.406977  
7,1,5915.083333  
7,1,4773.275000  
7,1,10576.023256  
7,1,2088.222561  
7,1,4718.531250  
7,1,3130.333333  
7,1,20573.750000  
7,1,2177.197674  
7,1,1954.292500  
7,1,4302.769231  
7,1,2373.432432  
7,1,1876.700521  
7,1,67156.390625  
7,1,2276.705882  
7,1,43777.000000  
7,1,13112.239264  
7,1,47100.742188  
7,1,5488.358491  
7,1,12942.976190  
7,1,2946.557927  
7,1,1737.137755  
7,1,59278.846154  
7,1,11262.325581  
7,1,2190.500000  
7,1,1900.651163  
7,1,4988.944882  
7,1,3818.348958  
7,1,14347.729730  
7,1,1539.611111  
7,1,47265.539474  
7,1,2587.658537  
7,1,6928.172872  
7,1,2628.480000

7,1,2182.048780  
7,1,21025.976351  
7,1,58651.790000  
7,1,3611.076389  
7,1,2970.709239  
7,1,1680.033854  
7,1,39787.250000  
7,1,16574.192308  
7,1,3284.679245  
7,1,20446.562500  
7,1,2619.847222  
7,1,2738.267857  
7,1,54791.707143  
7,1,1714.438830  
7,1,1898.366071  
7,1,19175.548913  
7,1,1538.590909  
7,1,1516.532609  
7,1,1582.716912  
7,1,6393.648438  
7,1,39628.336806  
7,1,4076.875000  
7,1,3434.553125  
7,1,1784.651163  
7,1,10692.368421  
7,1,2507.312500  
7,1,2127.464286  
7,1,1979.470930  
7,1,2841.522727  
7,1,21549.508929  
7,1,3933.086207  
7,1,3060.837838  
7,1,2165.410000  
7,1,2815.595000  
7,1,8381.857143  
7,1,30695.484375  
7,1,5043.533784  
7,1,3531.333333  
7,1,2631.062500  
7,1,2696.006250  
7,1,12655.086538  
7,1,6658.512136  
7,1,6939.023810  
7,1,26261.060897  
7,1,6964.428571  
7,1,4465.304054  
7,1,2261.222222  
7,1,20804.769231  
7,1,1589.486111  
7,1,2286.494565  
7,1,2736.019231  
7,1,3614.805825  
7,1,2968.761111  
7,1,37503.567568  
7,1,41456.302326  
7,1,3522.596875  
7,1,2855.191489  
7,1,7217.333333  
7,1,181404.262500  
7,1,133626.750000  
7,1,1560.454545  
7,1,2693.296196  
7,1,4442.653846  
7,1,1679.553977  
7,1,1888.927083  
7,1,46255.396429

7,1,12152.114362  
7,1,54518.006757  
7,1,1868.024390  
7,1,6388.226415  
7,1,2288.160714  
7,1,1922.255208  
7,1,1620.717105  
7,1,69397.296053  
7,1,8651.220109  
7,1,3083.289062  
7,1,3772.200000  
7,1,8602.250000  
7,1,14754.144231  
7,1,58710.621324  
7,1,29071.666667  
7,1,4897.343023  
7,1,4995.821429  
7,1,2955.825758  
7,1,5122.505814  
7,1,3477.300676  
7,1,3285.762195  
7,1,19752.897059  
7,1,66116.687500  
7,1,51571.185714  
7,1,3410.863636  
7,1,4199.692073  
7,1,1785.691860  
7,1,5688.049419  
7,1,2430.462838  
7,1,2591.666667  
7,1,1916.403125  
7,1,2158.609375  
7,1,1780.774390  
7,1,2176.000000  
7,1,8014.560811  
7,1,12004.851351  
7,1,3036.609375  
7,1,1532.750000  
7,1,8254.341463  
7,1,1624.181818  
7,1,1755.250000  
7,1,117729.765957  
7,1,3279.256757  
7,1,2502.358108  
7,1,3837.690476  
7,1,41862.375000  
7,1,26464.669643  
7,1,1809.723837  
7,1,45513.742424  
7,1,1593.253205  
7,1,133688.773256  
7,1,1937.319149  
7,1,2416.833333  
7,1,1876.590278  
7,1,1771.191489  
7,1,3586.956522  
7,1,50252.565625  
7,1,1798.270408  
7,1,44999.844595  
7,1,45306.200000  
7,1,2101.479730  
7,1,14450.870968  
7,1,1587.982955  
7,1,3531.500000  
7,1,1535.125000  
7,1,2315.281250

7,1,61323.418103  
7,1,8665.111486  
7,1,15443.632812  
7,1,1737.403226  
7,1,1994.636364  
7,1,1977.741477  
7,1,57532.916667  
7,1,2385.456522  
7,1,13364.068966  
7,1,1857.338415  
7,1,3610.845745  
7,1,2157.462500  
7,1,3524.401786  
7,1,35102.023810  
7,1,2795.000000  
7,1,7648.352679  
7,1,4925.846154  
7,1,2048.325581  
7,1,1787.053125  
7,1,5557.454545  
7,1,2496.083333  
7,1,39899.418367  
7,1,36714.225000  
7,1,2256.494681  
7,1,22341.722892  
7,1,1790.880319  
7,1,12163.500000  
7,1,2884.827381  
7,1,2859.325581  
7,1,1977.928571  
7,1,2147.105769  
7,1,103759.179487  
7,1,175809.675000  
7,1,19991.220588  
7,1,1821.200000  
7,1,2732.391667  
7,1,44503.000000  
7,1,38432.071875  
7,1,1642.259868  
7,1,2636.250000  
7,1,9539.700000  
7,1,3546.176471  
7,1,3445.230000  
7,1,2478.408163  
7,1,5763.684211  
7,1,10822.680000  
7,1,96691.968750  
7,1,4265.993243  
7,1,1977.790000  
7,1,118856.382979  
7,1,2237.386628  
7,1,65123.597561  
7,1,2720.769022  
7,1,1651.168605  
7,1,2855.601064  
7,1,3697.986486  
7,1,2671.909574  
7,1,11344.983871  
7,1,5600.000000  
7,1,55694.000000  
7,1,4871.996429  
7,1,16004.385135  
7,1,5064.500000  
7,1,19531.750000  
7,1,59165.466667  
7,1,2215.667763

7,1,1799.647727  
7,1,2565.120000  
7,1,1979.677326  
7,1,7336.633152  
7,1,2522.090625  
7,1,1915.341667  
7,1,2519.902344  
7,1,11009.325581  
7,1,41815.838235  
7,1,15673.062500  
7,1,4221.581250  
7,1,8253.235000  
7,1,64976.766304  
7,1,97114.847561  
7,1,21651.396825  
7,1,4238.185714  
7,1,70067.397436  
7,1,1691.732558  
7,1,55932.922297  
7,1,2671.545455  
7,1,1602.909091  
7,1,74384.356250  
7,1,2292.614286  
7,1,2445.415541  
7,1,5673.444444  
7,1,2943.210938  
7,1,2320.265957  
7,1,90352.125000  
7,1,1763.937500  
7,1,6467.914474  
7,1,1692.252604  
7,1,4674.232143  
7,1,3272.813830  
7,1,1768.045455  
7,1,3756.025000  
7,1,29612.100000  
7,1,2255.994186  
7,1,129738.098837  
7,1,13264.357955  
7,1,5603.020349  
7,1,1818.933333  
7,1,5196.105769  
7,1,1677.910714  
7,1,5254.242347  
7,1,3013.579268  
7,1,1922.659574  
7,1,11080.221154  
7,1,2384.684091  
7,1,2556.045139  
7,1,1744.522727  
7,1,2354.125000  
7,1,5956.385638  
7,1,1802.761364  
7,1,1823.448718  
7,1,1835.352941  
7,1,3125.914894  
7,1,1800.661184  
7,1,42730.000000  
7,1,1531.230769  
7,1,44856.476562  
7,1,80948.187500  
7,1,18648.806452  
7,1,2716.968750  
7,1,2680.081522  
7,1,17720.565341  
7,1,19564.914773

7,1,1625.257143  
7,1,3432.196429  
7,1,2386.939103  
7,1,91707.493243  
7,1,17866.648649  
7,1,16214.875000  
7,1,3275.765625  
7,1,4039.017857  
7,1,1620.152174  
7,1,3449.335784  
7,1,3894.448171  
7,1,1940.886905  
7,1,134790.708333  
7,1,42716.000000  
7,1,3976.098214  
7,1,9121.880952  
7,1,38034.150735  
7,1,1696.518229  
7,1,2963.110294  
7,1,1561.200000  
7,1,2231.210714  
7,1,18065.521739  
7,1,5689.893617  
7,1,32969.656977  
7,1,49270.743902  
7,1,2336.656250  
7,1,42156.815341  
7,1,26389.312500  
7,1,35884.282609  
7,1,2001.869565  
7,1,3228.000000  
7,1,2008.056250  
7,1,42614.530488  
7,1,2206.619565  
7,1,5406.405405  
7,1,1524.419118  
7,1,1848.000000  
7,1,23603.591912  
7,1,12039.062500  
7,1,2985.540541  
7,1,50514.491071  
7,1,16013.214286  
7,1,2393.704545  
7,1,5435.088235  
7,1,53042.600000  
7,1,2682.440789  
7,1,14506.928571  
7,1,2976.238636  
7,1,3206.621212  
7,1,21985.851064  
7,1,2443.650735  
7,1,1829.411111  
7,1,5593.875000  
7,1,3828.163462  
7,1,51161.585938  
7,1,6915.625000  
7,1,3206.699405  
7,1,9153.466346  
7,1,3605.526316  
7,1,29933.736842  
7,1,1897.875000  
7,1,1983.184028  
7,1,1594.025000  
7,1,15552.217391  
7,1,2131.091667  
7,1,2148.033333

7,1,2021.511905  
7,1,4381.208333  
7,1,2540.046512  
7,1,8363.033784  
7,1,1560.940789  
7,1,105579.017857  
7,1,1974.400000  
7,1,2083.304348  
7,1,1550.922222  
7,1,111487.255319  
7,1,2863.006250  
7,1,2080.546875  
7,1,2369.500000  
7,1,1886.500000  
7,1,1721.822674  
7,1,10119.469697  
7,1,2466.945000  
7,1,7924.988971  
7,1,28962.849265  
7,1,5663.277439  
7,1,34352.781250  
7,1,14583.208333  
7,1,1728.166667  
7,1,4083.093750  
7,1,2198.875000  
7,1,1512.166667  
7,1,10049.902439  
7,1,2744.296053  
7,1,1892.159722  
7,1,1940.288462  
7,1,10216.907609  
7,1,2404.212500  
7,1,2533.687500  
7,1,3135.174419  
7,1,1545.065625  
7,1,10152.571429  
7,1,36792.003289  
7,1,85507.687500  
7,1,1942.704787  
7,1,3767.763889  
7,1,7513.095238  
7,1,83622.679878  
7,1,5467.063291  
7,1,3384.833333  
7,1,3504.341463  
7,1,4800.595000  
7,1,76858.552326  
7,1,3553.950000  
7,1,1611.162162  
7,1,2099.127907  
7,1,50846.097561  
7,1,5212.264881  
7,1,4687.571429  
7,1,3092.736111  
7,1,1685.994681  
7,1,73700.914062  
7,1,3778.210366  
7,1,1683.478261  
7,1,2312.125000  
7,1,4824.968750  
7,1,41642.316860  
7,1,43148.860465  
7,1,3471.250000  
7,1,3671.987500  
7,1,1739.262821  
7,1,2050.240000

7,1,89666.992424  
7,1,3026.454082  
7,1,18427.222222  
7,1,16227.411932  
7,1,2461.942073  
7,1,1704.436224  
7,1,38624.766447  
7,1,1569.446809  
7,1,1812.630682  
7,1,23507.235795  
7,1,79057.250000  
7,1,52254.834559  
7,1,14223.488636  
7,1,17080.928571  
7,1,1702.591667  
7,1,1844.660714  
7,1,2107.674419  
7,1,35097.500000  
7,1,1661.543919  
7,1,2712.205357  
7,1,80554.200000  
7,1,55347.638889  
7,1,1793.250000  
7,1,32337.709677  
7,1,1590.000000  
7,1,6425.666667  
7,1,1897.685976  
7,1,38711.331250  
7,1,1732.500000  
7,1,58069.150000  
7,1,63448.835938  
7,1,4156.426829  
7,1,2523.642857  
7,1,5336.720109  
7,1,32626.407895  
7,1,11819.125000  
7,1,11001.666667  
7,1,6841.646552  
7,1,1951.404762  
7,1,1875.871795  
7,1,43546.312500  
7,1,3494.410714  
7,1,10509.767857  
7,1,3067.528571  
7,1,3109.500000  
7,1,3314.394444  
7,1,1970.103659  
7,1,19030.175000  
7,1,2811.627660  
7,1,8783.765244  
7,1,2097.920918  
7,1,30786.272727  
7,1,2083.672619  
7,1,5162.417500  
7,1,1640.986702  
7,1,2519.666667  
7,1,2582.798780  
7,1,4450.580882  
7,1,4130.417553  
7,1,42098.558594  
7,1,1703.616667  
7,1,5926.500000  
7,1,1944.414894  
7,1,3942.070946  
7,1,1912.682927  
7,1,2823.922619

7,1,4058.729730  
7,1,5815.750000  
7,1,44268.492647  
7,1,2162.839286  
7,1,1808.486413  
7,1,13692.019737  
7,1,19585.529762  
7,1,24530.664062  
7,1,14276.121622  
7,1,2329.241667  
7,1,2122.783784  
7,1,3658.765957  
7,1,4745.950000  
7,1,18402.606771  
7,1,3078.307692  
7,1,43398.570423  
7,1,13073.183333  
7,1,5695.768293  
7,1,4255.307692  
7,1,1525.059375  
7,1,70423.834302  
7,1,18023.500000  
7,1,1681.857143  
7,1,2546.076923  
7,1,2671.125000  
7,1,1609.736842  
7,1,8608.142857  
7,1,49737.297619  
7,1,4978.422872  
7,1,34168.171875  
7,1,2710.971429  
7,1,4453.234043  
7,1,2107.078947  
7,1,2512.798077  
7,1,22555.250000  
7,1,27098.455128  
7,1,1537.013158  
7,1,41180.445876  
7,1,4727.439024  
7,1,1499.709184  
7,1,2284.976190  
7,1,136751.658163  
7,1,4945.925000  
7,1,1629.857955  
7,1,2193.804878  
7,1,3219.542945  
7,1,1551.741477  
7,1,13873.071429  
7,1,1781.000000  
7,1,33587.846154  
7,1,3074.975610  
7,1,1533.533784  
7,1,3338.933333  
7,1,3506.785714  
7,1,3661.171875  
7,1,10204.347222  
7,1,1842.347826  
7,1,58384.772436  
7,1,18367.917500  
7,1,4794.350000  
7,1,29960.000000  
7,1,2050.377604  
7,1,119019.270833  
7,1,2199.768293  
7,1,2131.792683  
7,1,2870.531250

7,1,1762.865385  
7,1,2817.380435  
7,1,2378.910714  
7,1,2452.750000  
7,1,3733.821429  
7,1,9381.333333  
7,1,13642.770270  
7,1,2482.539062  
7,1,4198.800000  
7,1,4028.105263  
7,1,6133.725543  
7,1,2014.250000  
7,1,12009.774194  
7,1,1891.658537  
7,1,2656.632212  
7,1,3397.425000  
7,1,2514.917500  
7,1,3203.839674  
7,1,4220.781250  
7,1,4710.480769  
7,1,1954.250000  
7,1,2012.659091  
7,1,1824.058511  
7,1,1882.136905  
7,1,1795.654605  
7,1,1948.604592  
7,1,3134.686047  
7,1,9254.525641  
7,1,2424.939024  
7,1,1943.667553  
7,1,1854.278846  
7,1,41779.857143  
7,1,4406.777439  
7,1,28685.066667  
7,1,2470.174419  
7,1,3808.875000  
7,1,2358.548611  
7,1,2998.647222  
7,1,3846.622222  
7,1,2465.588889  
7,1,5277.726562  
7,1,1717.793548  
7,1,1692.175676  
7,1,3231.666667  
7,1,4139.802326  
7,1,1888.425676  
7,1,3281.768750  
7,1,11340.529891  
7,1,23048.591463  
7,1,1566.670455  
7,1,13838.017857  
7,1,1833.845238  
7,1,4694.000000  
7,1,3819.000000  
7,1,2576.408537  
7,1,42065.674479  
7,1,60077.833333  
7,1,64738.514151  
7,1,2606.635417  
7,1,2481.111111  
7,1,3083.187500  
7,1,19422.304688  
7,1,2190.659574  
7,1,4201.814208  
7,1,2688.440000  
7,1,1614.290541

7,1,1712.181818  
7,1,3432.119565  
7,1,1619.410256  
7,1,97111.796053  
7,1,4995.574324  
7,1,3950.095588  
7,1,2463.428571  
7,1,41657.996324  
7,1,2315.877358  
7,1,1582.794643  
7,1,2298.588235  
7,1,3014.352941  
7,1,5261.750000  
7,1,7603.133929  
7,1,2194.489362  
7,1,59608.138889  
7,1,4054.272727  
7,1,1642.882353  
7,1,4051.826389  
7,1,34975.052885  
7,1,2860.931818  
7,1,1961.073171  
7,1,3327.585366  
7,1,3184.595000  
7,1,42276.852941  
7,1,5818.093023  
7,1,9816.360294  
7,1,1879.209375  
7,1,10402.636364  
7,1,1855.031250  
7,1,1675.652778  
7,1,44857.763514  
7,1,1630.610119  
7,1,20111.791667  
7,1,5038.852941  
7,1,1504.839286  
7,1,7876.383721  
7,1,1837.858333  
7,1,16102.079545  
7,1,2436.020270  
7,1,19803.659574  
7,1,95046.114865  
7,1,1891.853125  
7,1,2051.229651  
7,1,34807.250000  
7,1,2526.781250  
7,1,83688.686275  
7,1,45029.201220  
7,1,36492.500000  
7,1,1558.408163  
7,1,1867.500000  
7,1,51013.666667  
7,1,2608.848404  
7,1,3796.564286  
7,1,4888.216216  
7,1,3095.811111  
7,1,1525.250000  
7,1,1973.437500  
7,1,43010.078125  
7,1,10001.947674  
7,1,2059.330882  
7,1,4356.531250  
7,1,7278.286458  
7,1,5188.287234  
7,1,46677.782051  
7,1,2220.066667

7,1,91158.115132  
7,1,2872.775000  
7,1,5192.823171  
7,1,8080.917411  
7,1,4106.875000  
7,1,3322.571429  
7,1,14726.235294  
7,1,36708.992857  
7,1,14972.325581  
7,1,16034.850000  
7,1,23544.375000  
7,1,40494.618902  
7,1,2083.950000  
7,1,1977.600000  
7,1,2193.714674  
7,1,1746.073718  
7,1,2574.642500  
7,1,2544.050000  
7,1,1798.186224  
7,1,1838.904070  
7,1,28487.950581  
7,1,1763.115132  
7,1,9524.342857  
7,1,2410.546053  
7,1,2112.500000  
7,1,96427.594595  
7,1,2323.766447  
7,1,1935.142857  
7,1,1890.959559  
7,1,1777.195122  
7,1,1674.922222  
7,1,3323.177778  
7,1,24038.625000  
7,1,2837.864865  
7,1,31787.384615  
7,1,2066.299342  
7,1,4069.468750  
7,1,55857.764706  
7,1,1589.630435  
7,1,1738.717143  
7,1,48944.393939  
7,1,19286.120968  
7,1,25023.660714  
7,1,1974.270349  
7,1,196136.309659  
7,1,22918.148438  
7,1,4260.649123  
7,1,2106.351190  
7,1,50549.658784  
7,1,4674.531250  
7,1,53167.350000  
7,1,14523.840000  
7,1,13712.906250  
7,1,3824.581395  
7,1,4909.051630  
7,1,2145.733333  
7,1,1562.080729  
7,1,1958.068182  
7,1,16754.571429  
7,1,3166.923497  
7,1,1730.789634  
7,1,13076.370690  
7,1,4459.589286  
7,1,72135.893750  
7,1,1924.185976  
7,1,6301.530488

7,1,1512.958333  
7,1,4380.787500  
7,1,4150.425532  
7,1,5001.404255  
7,1,3662.142857  
7,1,192441.790816  
7,1,65408.316176  
7,1,6780.148936  
7,1,5453.806122  
7,1,78004.028571  
7,1,4543.491667  
7,1,4280.959459  
7,1,2696.081633  
7,1,5232.687500  
7,1,6213.991228  
7,1,42859.268293  
7,1,2476.148438  
7,1,3307.543750  
7,1,2619.404412  
7,1,6130.741935  
7,1,4140.363636  
7,1,2171.291667  
7,1,2569.423077  
7,1,5253.576087  
7,1,3063.159574  
7,1,121048.555556  
7,1,3650.889286  
7,1,22885.218750  
7,1,1998.162162  
7,1,3248.323529  
7,1,1671.217105  
7,1,2187.733333  
7,1,16170.744681  
7,1,7454.537234  
7,1,2236.142857  
7,1,2529.317073  
7,1,5000.027027  
7,1,2382.186047  
7,1,34712.462500  
7,1,7201.411932  
7,1,2470.330128  
7,1,4784.333333  
7,1,4147.233696  
7,1,1993.543750  
7,1,4746.815217  
7,1,2591.988095  
7,1,1591.348684  
7,1,1683.685714  
7,1,1909.750000  
7,1,1826.779070  
7,1,45700.941176  
7,1,4481.285714  
7,1,1867.765957  
7,1,1624.918367  
7,1,1911.365591  
7,1,5420.505319  
7,1,3611.753378  
7,1,9235.270408  
7,1,80131.912500  
7,1,5691.997093  
7,1,2770.034884  
7,1,2121.000000  
7,1,2641.911765  
7,1,2113.003472  
7,1,2684.765957  
7,1,2215.545732

7,1,5473.583333  
7,1,2464.637755  
7,1,1927.508721  
7,1,2131.916667  
7,1,1719.836111  
7,1,2040.633333  
7,1,52085.450000  
7,1,37517.983974  
7,1,14727.692308  
7,1,3892.915698  
7,1,4900.000000  
7,1,70333.398810  
7,1,37157.980263  
7,1,25623.875000  
7,1,6537.340426  
7,1,3621.013298  
7,1,1806.361111  
7,1,2448.883523  
7,1,1615.611111  
7,1,5533.883721  
7,1,1814.529762  
7,1,3123.018293  
7,1,7161.400000  
7,1,1728.553977  
7,1,16458.851415  
7,1,4843.551136  
7,1,24306.448276  
7,1,2048.438776  
7,1,6506.953804  
7,1,5704.418478  
7,1,1832.789062  
7,1,99224.438953  
7,1,63926.909091  
7,1,1932.400641  
7,1,38001.320312  
7,1,26198.056250  
7,1,12100.420455  
7,1,1872.375000  
7,1,31347.170455  
7,1,84955.391026  
7,1,2218.653846  
7,1,1517.916667  
7,1,2311.950893  
7,1,3608.017857  
7,1,2727.431548  
7,1,45859.493421  
7,1,7915.768939  
7,1,2170.809375  
7,1,3857.160714  
7,1,1646.067568  
7,1,13897.166667  
7,1,39803.697368  
7,1,8262.886792  
7,1,3351.075000  
7,1,2272.965909  
7,1,1545.493421  
7,1,2283.609756  
7,1,2028.934896  
7,1,3048.928571  
7,1,11945.170732  
7,1,4000.303191  
7,1,75701.183333  
7,1,2049.493902  
7,1,6437.153846  
7,1,40571.801020  
7,1,1573.968085

7,1,5971.358108  
7,1,1878.127778  
7,1,2410.854730  
7,1,1779.761905  
7,1,2650.600000  
7,1,27989.852273  
7,1,27205.325758  
7,1,1642.508929  
7,1,1621.059783  
7,1,33628.305556  
7,1,4400.382979  
7,1,6834.820652  
7,1,2743.523437  
7,1,1690.415094  
7,1,3100.716463  
7,1,1531.328947  
7,1,24404.851562  
7,1,2122.678571  
7,1,6848.420732  
7,1,1864.907895  
7,1,1701.744186  
7,1,2146.514706  
7,1,4328.830882  
7,1,1564.625000  
7,1,2996.114362  
7,1,8068.602041  
7,1,8128.384375  
7,1,2182.635870  
7,1,1521.312500  
7,1,1690.894737  
7,1,58224.586207  
7,1,2934.730769  
7,1,2692.580357  
7,1,20697.880952  
7,1,2540.050000  
7,1,2291.497093  
7,1,4311.820312  
7,1,16799.235294  
7,1,1819.444444  
7,1,6809.372549  
7,1,5760.883929  
7,1,34819.325000  
7,1,4283.037500  
7,1,2837.833333  
7,1,5070.600000  
7,1,4730.299107  
7,1,5346.208333  
7,1,34297.352941  
7,1,1873.767442  
7,1,1709.578125  
7,1,5801.453947  
7,1,2629.789474  
7,1,4417.666667  
7,1,2669.611702  
7,1,1615.843750  
7,1,3440.677326  
7,1,3759.521739  
7,1,2028.852273  
7,1,27187.285714  
7,1,1683.947368  
7,1,2166.786184  
7,1,2804.000000  
7,1,2977.666667  
7,1,24533.500000  
7,1,6665.829082  
7,1,1920.447917

7,1,2183.251366  
7,1,2936.201087  
7,1,1748.219512  
7,1,4475.333333  
7,1,1548.655488  
7,1,72752.412162  
7,1,1950.790625  
7,1,3217.521739  
7,1,2917.216216  
7,1,19874.194444  
7,1,25671.387097  
7,1,2718.206081  
7,1,5546.471875  
7,1,6114.979592  
7,1,1763.878788  
7,1,3468.855769  
7,1,1912.275000  
7,1,2580.752907  
7,1,1794.727273  
7,1,5495.535000  
7,1,3167.875000  
7,1,1810.380682  
7,1,28110.378378  
7,1,19081.512097  
7,1,1751.423077  
7,1,2314.540541  
7,1,26640.875000  
7,1,1720.200000  
7,1,1674.165625  
7,1,1771.000000  
7,1,7858.348039  
7,1,41010.618056  
7,1,2685.053191  
7,1,20989.800000  
7,1,4191.118902  
7,1,67994.898649  
7,1,6254.776316  
7,1,53305.250000  
7,1,11881.833333  
7,1,1688.482955  
7,1,2007.114130  
7,1,12743.000000  
7,1,3624.875000  
7,1,26436.802083  
7,1,4553.308036  
7,1,21861.934783  
7,1,7842.442308  
7,1,2616.946875  
7,1,2406.783333  
7,1,6806.710526  
7,1,1930.625000  
7,1,7983.889706  
7,1,6386.044444  
7,1,41094.130952  
7,1,4215.945122  
7,1,70940.582237  
7,1,34413.865854  
7,1,44687.083333  
7,1,2336.348837  
7,1,4118.515625  
7,1,34964.789474  
7,1,2307.082143  
7,1,117210.468750  
7,1,4696.694444  
7,1,38692.750000  
7,1,38619.916667

7,1,2510.446809  
7,1,7351.257653  
7,1,1599.157738  
7,1,2638.469388  
7,1,3050.842105  
7,1,1688.256098  
7,1,3556.918605  
7,1,1938.200000  
7,1,5810.935185  
7,1,1626.125000  
7,1,80052.328947  
7,1,3028.323529  
7,1,1735.430556  
7,1,75612.250000  
7,1,1835.475000  
7,1,6965.917500  
7,1,1981.725000  
7,1,113463.552326  
7,1,7774.443182  
7,1,1729.163265  
7,1,3318.727778  
7,1,5109.117347  
7,1,35473.887500  
7,1,45754.558824  
7,1,15669.600000  
7,1,68192.461111  
7,1,1564.341463  
7,1,10215.806034  
7,1,7056.151316  
7,1,1582.843085  
7,1,30531.550781  
7,1,4013.408163  
7,1,91462.042553  
7,1,4181.786932  
7,1,4974.151786  
7,1,3355.208333  
7,1,1584.387500  
7,1,6905.991477  
7,1,6923.548913  
7,1,6861.571023  
7,1,94540.383065  
7,1,67474.631579  
7,1,1988.650641  
7,1,20397.507874  
7,1,35283.404412  
7,1,2572.514706  
7,1,42430.884615  
7,1,4366.213415  
7,1,22397.033333  
7,1,2068.117647  
7,1,6492.523026  
7,1,2497.618902  
7,1,2256.000000  
7,1,34488.135870  
7,1,4516.097500  
7,1,67408.675497  
7,1,33981.352273  
7,1,3111.721354  
7,1,48372.157143  
7,1,34290.270270  
7,1,2185.456522  
7,1,18246.618243  
7,1,27965.829268  
7,1,3044.219880  
7,1,4345.611842  
7,1,2600.782609

7,1,9929.612903  
7,1,36249.216216  
7,1,83398.562500  
7,1,3201.788462  
7,1,2234.340116  
7,1,2233.410000  
7,1,24276.437500  
7,1,3233.934783  
7,1,2548.587838  
7,1,29324.854167  
7,1,3872.487805  
7,1,4088.907738  
7,1,6298.304878  
7,1,10729.943548  
7,1,1508.825806  
7,1,9517.272727  
7,1,6590.600000  
7,1,5619.247368  
7,1,1883.714286  
7,1,3434.673469  
7,1,5166.255682  
7,1,1509.928571  
7,1,121160.898810  
7,1,3275.086957  
7,1,1616.805851  
7,1,2385.017045  
7,1,2557.523585  
7,1,2461.607143  
7,1,19587.335938  
7,1,3963.323529  
7,1,38113.065217  
7,1,12661.261364  
7,1,16243.019886  
7,1,2880.367347  
7,1,7089.276316  
7,1,7773.081522  
7,1,3389.127907  
7,1,4999.656250  
7,1,2296.418919  
7,1,2055.454545  
7,1,7716.905405  
7,1,3315.910714  
7,1,1887.850000  
7,1,5319.678571  
7,1,8995.511111  
7,1,1938.590909  
7,1,13774.651316  
7,1,5333.404891  
7,1,15134.875000  
7,1,107522.403226  
7,1,2973.951613  
7,1,138647.456522  
7,1,4776.694444  
7,1,12406.284314  
7,1,11553.653846  
7,1,89544.905405  
7,1,3609.880000  
7,1,3408.446809  
7,1,2088.243902  
7,1,3981.375000  
7,1,1986.232143  
7,1,2548.600000  
7,1,5857.735795  
7,1,41077.300000  
7,1,7031.878378  
7,1,13343.303191

7,1,3803.000000  
7,1,73872.679487  
7,1,4402.056604  
7,1,14617.832317  
7,1,12449.371951  
7,1,23841.576271  
7,1,2194.135135  
7,1,2449.683333  
7,1,14356.260417  
7,1,1993.915698  
7,1,1993.697368  
7,1,15288.000000  
7,1,10141.395349  
7,1,2398.000000  
7,1,5193.143750  
7,1,63996.110795  
7,1,3092.897500  
7,1,25151.793750  
7,1,2814.500000  
7,1,18046.081395  
7,1,2391.000000  
7,1,12658.852679  
7,1,3459.486111  
7,1,3509.062500  
7,1,1662.948864  
7,1,1729.702128  
7,1,3941.520408  
7,1,4945.705128  
7,1,2736.142857  
7,1,2823.600000  
7,1,2225.711111  
7,1,1899.928191  
7,1,15079.812500  
7,1,3618.095808  
7,1,3768.948718  
7,1,18474.871711  
7,1,6966.290698  
7,1,6395.896341  
7,1,3876.424242  
7,1,13440.059659  
7,1,17804.351190  
7,1,2883.958333  
7,1,3299.243902  
7,1,2147.107143  
7,1,13494.043367  
7,1,2488.156250  
7,1,2346.549451  
7,1,4129.046512  
7,1,1684.181818  
7,1,1673.289773  
7,1,5327.973684  
7,1,1908.800000  
7,1,9559.500000  
7,1,2546.771930  
7,1,24221.812500  
7,1,11068.847222  
7,1,1747.181818  
7,1,17577.371324  
7,1,3550.857143  
7,1,27242.243243  
7,1,5497.625000  
7,1,1597.031250  
7,1,10738.656250  
7,1,2747.195652  
7,1,2122.529412  
7,1,35468.798295

7,1,2257.183511  
7,1,1567.666667  
7,1,12133.612069  
7,1,1864.454082  
7,1,12937.650000  
7,1,6274.202128  
7,1,2574.000000  
7,1,70358.190476  
7,1,2064.058511  
7,1,5103.350000  
7,1,3984.173780  
7,1,19764.142857  
7,1,2119.651786  
7,1,5815.521739  
7,1,54272.636364  
7,1,49404.333333  
7,1,13477.253676  
7,1,3318.978261  
7,1,3168.945122  
7,1,2267.258065  
7,1,1781.060897  
7,1,2218.606707  
7,1,1571.045455  
7,1,2092.225191  
7,1,31354.302326  
7,1,2608.780405  
7,1,2190.856250  
7,1,3383.096154  
7,1,1575.946809  
7,1,1516.226562  
7,1,1611.238281  
7,1,2343.200000  
7,1,3366.564024  
7,1,13946.455128  
7,1,2319.207547  
7,1,3753.015152  
7,1,30488.139706  
7,1,1505.539474  
7,1,17899.000000  
7,1,3501.000000  
7,1,8080.412162  
7,1,1819.447222  
7,1,1506.791667  
7,1,3688.045918  
7,1,1617.230769  
7,1,2546.625000  
7,1,3227.041667  
7,1,1597.072917  
7,1,77618.217857  
7,1,1559.213415  
7,1,31953.236842  
7,1,3753.579268  
7,1,5396.088235  
7,1,10620.913043  
7,1,3827.296875  
7,1,7268.536765  
7,1,5122.906250  
7,1,16010.625000  
7,1,1590.390625  
7,1,3285.818182  
7,1,2300.943548  
7,1,3775.218750  
7,1,3162.298913  
7,1,2714.318182  
7,1,94867.791667  
7,1,8091.168919

7,1,10626.234091  
7,1,1528.183824  
7,1,37553.209302  
7,1,6269.929348  
7,1,5450.527778  
7,1,5985.613636  
7,1,2857.239865  
7,1,3544.000000  
7,1,3533.120968  
7,1,4969.362245  
7,1,7400.953947  
7,1,2146.125000  
7,1,23944.696970  
7,1,20585.352273  
7,1,1501.687500  
7,1,3486.562500  
7,1,6995.602041  
7,1,6194.760870  
7,1,2008.610577  
7,1,2135.576087  
7,1,1813.282895  
7,1,4561.390625  
7,1,2782.558140  
7,1,43965.000000  
7,1,7191.964674  
7,1,2561.857143  
7,1,2703.505814  
7,1,6424.611842  
7,1,6966.148026  
7,1,1961.455882  
7,1,1502.758721  
7,1,2926.201613  
7,1,1829.298780  
7,1,2310.392857  
7,1,1520.947115  
7,1,3077.298077  
7,1,30951.197368  
7,1,15333.614583  
7,1,1850.177778  
7,1,2313.306122  
7,1,5896.437500  
7,1,1685.975000  
7,1,2481.690476  
7,1,3556.669811  
7,1,1505.976190  
7,1,8173.227941  
7,1,61552.858553  
7,1,87006.647727  
7,1,1680.543478  
7,1,5438.716667  
7,1,16088.913907  
7,1,1935.690476  
7,1,106579.075000  
7,1,1633.700758  
7,1,2777.153846  
7,1,45284.216216  
7,1,1603.478261  
7,1,3314.933333  
7,1,6675.201220  
7,1,2179.068182  
7,1,29741.531250  
7,1,4909.570946  
7,1,16117.793103  
7,1,16245.892857  
7,1,2147.806122  
7,1,14198.151515

7,1,1842.054054  
7,1,3579.812500  
7,1,1735.813953  
7,1,5688.527439  
7,1,1886.200000  
7,1,3131.691667  
7,1,2222.060811  
7,1,1677.880319  
7,1,7558.147959  
7,1,2623.125000  
7,1,3214.897727  
7,1,11469.878788  
7,1,4152.200000  
7,1,1597.250000  
7,1,2945.513298  
7,1,3932.175595  
7,1,1745.410714  
7,1,2952.094595  
7,1,1957.000000  
7,1,1629.375000  
7,1,23424.487903  
7,1,2107.202703  
7,1,2354.581522  
7,1,12809.202381  
7,1,1973.169643  
7,1,7039.058824  
7,1,1595.488372  
7,1,1974.100000  
7,1,1513.333333  
7,1,2034.382812  
7,1,18317.500000  
7,1,1753.687500  
7,1,5582.396552  
7,1,3204.292683  
7,1,1765.146277  
7,1,76663.130952  
7,1,11354.911111  
7,1,1684.734848  
7,1,2272.000000  
7,1,87281.000000  
7,1,5450.186111  
7,1,64513.000000  
7,1,26387.851351  
7,1,2553.500000  
7,1,3598.794355  
7,1,1546.992424  
7,1,148823.095238  
7,1,35103.692308  
7,1,4962.583333  
7,1,65393.622159  
7,1,1849.702857  
7,1,3348.009868  
7,1,2232.048077  
7,1,9805.979167  
7,1,2039.127717  
7,1,2582.290000  
7,1,1783.117647  
7,1,15781.691489  
7,1,82201.616477  
7,1,1918.173780  
7,1,31393.946429  
7,1,2522.534884  
7,1,47195.812500  
7,1,1662.585000  
7,1,4074.011194  
7,1,1718.322581

7,1,43266.943452  
7,1,10049.858974  
7,1,1849.708333  
7,1,24194.392857  
7,1,23065.353659  
7,1,6074.387195  
7,1,4779.189189  
7,1,6089.110795  
7,1,3850.485119  
7,1,1861.028302  
7,1,1825.333333  
7,1,1558.719512  
7,1,50994.750000  
7,1,3170.696429  
7,1,3246.093750  
7,1,35398.027027  
7,1,2453.079545  
7,1,12607.263158  
7,1,1575.643617  
7,1,4885.885417  
7,1,2706.328947  
7,1,2407.445946  
7,1,3232.899390  
7,1,11256.833333  
7,1,1667.350962  
7,1,28730.907609  
7,1,1820.125000  
7,1,42676.406250  
7,1,31883.527027  
7,1,3518.740000  
7,1,2049.869186  
7,1,5694.229167  
7,1,1584.731771  
7,1,3798.600000  
7,1,63795.847826  
7,1,2000.891892  
7,1,1937.508929  
7,1,2886.176829  
7,1,2632.423077  
7,1,2604.944767  
7,1,3884.900510  
7,1,99182.821429  
7,1,2122.140000  
7,1,8502.173469  
7,1,5098.634615  
7,1,2097.292683  
7,1,52329.812500  
7,1,100015.967391  
7,1,2343.724432  
7,1,35156.050000  
7,1,33906.270833  
7,1,87969.493421  
7,1,2033.187500  
7,1,5337.029412  
7,1,62374.369186  
7,1,1799.302419  
7,1,1541.000000  
7,1,1681.080128  
7,1,3019.007143  
7,1,2394.875000  
7,1,2715.390625  
7,1,2069.250000  
7,1,1591.040625  
7,1,3696.359375  
7,1,111961.820513  
7,1,56067.958333

7,1,2660.800000  
7,1,7171.703947  
7,1,16010.826923  
7,1,3112.845109  
7,1,108347.464286  
7,1,2579.778125  
7,1,2089.372093  
7,1,4857.113372  
7,1,2674.800000  
7,1,14648.296053  
7,1,2300.378049  
7,1,2008.473214  
7,1,22671.718085  
7,1,4168.621429  
7,1,1575.829268  
7,1,4225.187500  
7,1,6099.747396  
7,1,11584.738372  
7,1,3210.862805  
7,1,20000.386719  
7,1,2301.941176  
7,1,1848.036585  
7,1,6924.382353  
7,1,1525.200000  
7,1,162704.000000  
7,1,2934.669118  
7,1,4272.533333  
7,1,49825.774834  
7,1,57183.909375  
7,1,80491.448718  
7,1,1545.272727  
7,1,8802.611842  
7,1,3189.518519  
7,1,1944.488636  
7,1,1536.125000  
7,1,2091.472222  
7,1,2516.023810  
7,1,2408.000000  
7,1,1612.269231  
7,1,7231.984848  
7,1,2420.091216  
7,1,6855.848485  
7,1,3037.070652  
7,1,14534.988889  
7,1,15958.951220  
7,1,5623.630435  
7,1,1588.872093  
7,1,8157.644231  
7,1,10951.916667  
7,1,4180.659091  
7,1,2370.083333  
7,1,3346.647959  
7,1,1809.096591  
7,1,1805.819149  
7,1,4839.872340  
7,1,4405.359375  
7,1,1799.939394  
7,1,38399.878289  
7,1,1520.577778  
7,1,57604.750000  
7,1,12700.750000  
7,1,2023.396341  
7,1,2083.302632  
7,1,1804.599010  
7,1,1721.402174  
7,1,2528.011719

7,1,12636.978261  
7,1,2546.189024  
7,1,10350.735000  
7,1,2725.481675  
7,1,144096.670455  
7,1,5251.947368  
7,1,7490.151786  
7,1,2465.000000  
7,1,5839.517857  
7,1,1756.634146  
7,1,110514.700000  
7,1,1907.829787  
7,1,3305.939394  
7,1,1558.308140  
7,1,2375.277778  
7,1,51204.125000  
7,1,13294.534091  
7,1,24789.833333  
7,1,1664.121212  
7,1,1930.512821  
7,1,34119.783784  
7,1,2819.500000  
7,1,1832.141304  
7,1,1621.544643  
7,1,2674.456731  
7,1,5017.875000  
7,1,4209.166667  
7,1,1796.048295  
7,1,2392.666667  
7,1,1840.480769  
7,1,3787.290816  
7,1,5858.663043  
7,1,8266.515625  
7,1,4996.694079  
7,1,1515.862069  
7,1,1823.437500  
7,1,2009.263158  
7,1,2077.902439  
7,1,1806.416667  
7,1,1526.676136  
7,1,17869.408088  
7,1,1768.500000  
7,1,2494.083333  
7,1,4088.440789  
7,1,42591.547297  
7,1,36916.781250  
7,1,4261.281250  
7,1,3134.560976  
7,1,4012.101064  
7,1,43037.920455  
7,1,1703.451220  
7,1,2505.285326  
7,1,3703.875000  
7,1,2889.514881  
7,1,6792.433333  
7,1,2170.179688  
7,1,4137.235294  
7,1,9078.500000  
7,1,9163.187500  
7,1,2115.206250  
7,1,3439.358586  
7,1,8243.898810  
7,1,18054.600000  
7,1,10352.600000  
7,1,90273.895270  
7,1,3456.551630

7,1,9923.437500  
7,1,3998.474432  
7,1,2302.291667  
7,1,33459.329861  
7,1,1653.651163  
7,1,3126.275000  
7,1,2684.616279  
7,1,1706.062500  
7,1,135940.658537  
7,1,5640.119186  
7,1,26248.357955  
7,1,2008.136364  
7,1,3250.785714  
7,1,117997.705000  
7,1,2601.198718  
7,1,25339.200758  
7,1,2567.833333  
7,1,2802.151163  
7,1,2127.335714  
7,1,49172.128788  
7,1,3256.549419  
7,1,3652.385870  
7,1,20468.612069  
7,1,2161.382353  
7,1,2188.750000  
7,1,4748.875000  
7,1,2379.294118  
7,1,2034.214286  
7,1,2377.570312  
7,1,3899.641304  
7,1,83993.432692  
7,1,14206.000000  
7,1,4793.531088  
7,1,18852.906250  
7,1,43464.062500  
7,1,1774.227273  
7,1,1794.153846  
7,1,1743.127907  
7,1,1515.460227  
7,1,1792.478261  
7,1,1730.658537  
7,1,1736.367347  
7,1,1791.264535  
7,1,4968.687500  
7,1,84927.736842  
7,1,2609.977778  
7,1,1581.986842  
7,1,4562.418919  
7,1,2697.200000  
7,1,4831.511905  
7,1,7795.389706  
7,1,4988.951923  
7,1,3966.318750  
7,1,9420.416667  
7,1,1946.475543  
7,1,2184.593750  
7,1,1870.729167  
7,1,2776.125000  
7,1,3427.790698  
7,1,2350.521739  
7,1,11778.837500  
7,1,2317.397059  
7,1,18565.898305  
7,1,17729.739130  
7,1,20754.293269  
7,1,4279.232955

7,1,2597.938889  
7,1,3627.315476  
7,1,2208.853659  
7,1,7429.227941  
7,1,72344.578947  
7,1,2033.712500  
7,1,3766.243902  
7,1,3679.875000  
7,1,2053.778846  
7,1,8670.085106  
7,1,2479.174419  
7,1,1903.465116  
7,1,3771.932432  
7,1,2738.651786  
7,1,31640.475694  
7,1,34904.059659  
7,1,1985.259615  
7,1,2725.421512  
7,1,13998.523438  
7,1,71539.263889  
7,1,4009.070312  
7,1,4856.130435  
7,1,2340.514706  
7,1,1542.934524  
7,1,2420.391304  
7,1,2781.940789  
7,1,90386.270833  
7,1,2986.200000  
7,1,2136.068182  
7,1,2798.755814  
7,1,3624.296875  
7,1,3359.931138  
7,1,7044.360000  
7,1,1754.804878  
7,1,3685.407609  
7,1,5770.470930  
7,1,2004.438953  
7,1,2602.408163  
7,1,1600.243902  
7,1,5232.333333  
7,1,38663.694444  
7,1,2090.558594  
7,1,7592.254902  
7,1,85794.025568  
7,1,1898.923077  
7,1,2112.534247  
7,1,32983.099315  
7,1,4467.325521  
7,1,2297.250000  
7,1,2483.795455  
7,1,1931.990196  
7,1,84151.265957  
7,1,3580.815104  
7,1,3132.735000  
7,1,2421.681818  
7,1,12802.786996  
7,1,2217.478261  
7,1,12120.567568  
7,1,2448.141304  
7,1,5220.612805  
7,1,58072.086538  
7,1,1782.132979  
7,1,6006.530660  
7,1,1539.073171  
7,1,1919.630435  
7,1,3255.769231

7,1,4203.112500  
7,1,2519.409375  
7,1,1726.553571  
7,1,100589.689189  
7,1,7324.482143  
7,1,8368.156977  
7,1,2468.021739  
7,1,2404.088415  
7,1,1805.450000  
7,1,2615.832500  
7,1,4024.964286  
7,1,1945.250000  
7,1,42389.831081  
7,1,5712.292553  
7,1,10101.791667  
7,1,12429.441463  
7,1,13881.427419  
7,1,84524.069079  
7,1,60909.994318  
7,1,43583.005435  
7,1,44867.934211  
7,1,1834.407609  
7,1,1513.075843  
7,1,4206.064516  
7,1,1503.250000  
7,1,3548.625000  
7,1,6220.375000  
7,1,8412.350694  
7,1,3900.511111  
7,1,2160.975806  
7,1,1815.250000  
7,1,3759.622222  
7,1,2122.125000  
7,1,36457.375000  
7,1,32370.600000  
7,1,2209.348958  
7,1,23666.482993  
7,1,1906.948980  
7,1,7450.540179  
7,1,1557.666667  
7,1,3727.278409  
7,1,16635.866667  
7,1,2555.396739  
7,1,7570.500000  
7,1,32071.461111  
7,1,1781.631944  
7,1,8468.509146  
7,1,5432.987245  
7,1,7734.915698  
7,1,2257.255435  
7,1,30759.554348  
7,1,4813.483871  
7,1,15353.222656  
7,1,2953.437500  
7,1,3717.252660  
7,1,12587.250000  
7,1,50987.506757  
7,1,2336.983696  
7,1,3685.161765  
7,1,23682.875000  
7,1,23137.579082  
7,1,1848.562500  
7,1,3591.083333  
7,1,23854.709302  
7,1,2245.029412  
7,1,4674.038889

7,1,3228.062500  
7,1,7554.847222  
7,1,4323.427083  
7,1,3324.892857  
7,1,2547.295455  
7,1,15351.803571  
7,1,1810.934524  
7,1,1873.937198  
7,1,1684.404891  
7,1,1716.110294  
7,1,3530.062500  
7,1,7157.032609  
7,1,1569.830357  
7,1,10584.724138  
7,1,1725.820513  
7,1,7702.960227  
7,1,3411.583333  
7,1,1716.843750  
7,1,21598.765625  
7,1,2229.275463  
7,1,4011.193452  
7,1,3112.846154  
7,1,1665.326705  
7,1,2679.508721  
7,1,65571.510870  
7,1,12985.113636  
7,1,3753.046512  
7,1,1630.964286  
7,1,2346.647727  
7,1,1666.887195  
7,1,50538.875000  
7,1,7259.137500  
7,1,1703.758333  
7,1,57645.244186  
7,1,2869.576923  
7,1,2277.600000  
7,1,3305.475610  
7,1,2744.395349  
7,1,1690.621711  
7,1,2427.560976  
7,1,32657.500000  
7,1,1940.008929  
7,1,9625.752841  
7,1,3238.261111  
7,1,4256.763889  
7,1,86247.034483  
7,1,2276.924342  
7,1,2573.842105  
7,1,72344.678571  
7,1,2150.178571  
7,1,1969.000000  
7,1,2911.664740  
7,1,2461.730769  
7,1,5310.238372  
7,1,2500.865741  
7,1,4568.375000  
7,1,15003.750000  
7,1,2008.742647  
7,1,21201.015625  
7,1,2472.800000  
7,1,1779.698529  
7,1,4805.335938  
7,1,2087.377907  
7,1,39439.134328  
7,1,3086.884868  
7,1,2025.764286

7,1,2578.558511  
7,1,1594.750000  
7,1,7099.758152  
7,1,2693.482759  
7,1,2175.888298  
7,1,1656.812500  
7,1,2949.401961  
7,1,10720.515625  
7,1,16694.611486  
7,1,3541.630556  
7,1,2117.409091  
7,1,1666.142857  
7,1,2475.111111  
7,1,103830.285714  
7,1,2034.056818  
7,1,2169.800000  
7,1,3898.868243  
7,1,53951.588608  
7,1,1981.009868  
7,1,10401.973684  
7,1,6559.837838  
7,1,89308.833333  
7,1,59432.916667  
7,1,71960.218023  
7,1,1558.250000  
7,1,9057.775000  
7,1,4712.500000  
7,1,1714.219697  
7,1,1749.151316  
7,1,1699.578571  
7,1,21751.817568  
7,1,2051.519886  
7,1,1555.024194  
7,1,63281.261628  
7,1,2259.563889  
7,1,1735.133333  
7,1,2015.382576  
7,1,3213.625000  
7,1,2298.410326  
7,1,3176.316667  
7,1,2641.365385  
7,1,62515.187500  
7,1,2022.105556  
7,1,49165.100000  
7,1,56605.135135  
7,1,1665.598214  
7,1,30084.571429  
7,1,3129.392157  
7,1,61555.453488  
7,1,2993.969512  
7,1,1699.100000  
7,1,17990.000000  
7,1,1582.282051  
7,1,2799.428571  
7,1,40470.285714  
7,1,79233.782051  
7,1,5391.495000  
7,1,2789.529412  
7,1,2351.544444  
7,1,1942.230769  
7,1,3958.625000  
7,1,59992.326923  
7,1,36928.142857  
7,1,3002.095238  
7,1,41081.506410  
7,1,1572.756250

7,1,1861.322034  
7,1,9697.785714  
7,1,2103.261905  
7,1,1678.766447  
7,1,5476.110000  
7,1,3281.284091  
7,1,40889.375000  
7,1,3523.675000  
7,1,1964.146875  
7,1,4225.859375  
7,1,15574.389881  
7,1,1529.524457  
7,1,1788.833333  
7,1,4009.780488  
7,1,3937.197222  
7,1,3681.765306  
7,1,1680.718750  
7,1,1685.850000  
7,1,3759.138889  
7,1,14381.540441  
7,1,1518.170732  
7,1,6400.994048  
7,1,1564.329787  
7,1,5989.700000  
7,1,7831.113971  
7,1,4088.703947  
7,1,10323.741071  
7,1,30350.715827  
7,1,1949.565217  
7,1,5350.712121  
7,1,2845.234375  
7,1,3766.134615  
7,1,14810.542553  
7,1,41640.090909  
7,1,2367.207317  
7,1,2206.161290  
7,1,1626.026316  
7,1,9589.130435  
7,1,2402.616071  
7,1,5293.744444  
7,1,1657.551020  
7,1,2202.809524  
7,1,2328.594512  
7,1,35323.887500  
7,1,3028.303191  
7,1,1614.045213  
7,1,5874.325000  
7,1,3072.335106  
7,1,32060.106618  
7,1,2118.986413  
7,1,2680.867925  
7,1,3146.614130  
7,1,3683.300000  
7,1,130188.834184  
7,1,4552.703488  
7,1,42483.585366  
7,1,2616.423077  
7,1,1893.348684  
7,1,16730.286765  
7,1,2185.925000  
7,1,1836.320122  
7,1,104754.750000  
7,1,2882.293919  
7,1,51816.857143  
7,1,3639.204082  
7,1,21482.271277

7,1,117523.166667  
7,1,2545.500000  
7,1,6743.914894  
7,1,2260.594286  
7,1,1564.293919  
7,1,1847.739583  
7,1,57155.138158  
7,1,23500.319444  
7,1,5772.935897  
7,1,2092.565217  
7,1,12709.713710  
7,1,6347.057692  
7,1,1867.697674  
7,1,87720.730769  
7,1,16617.500000  
7,1,1707.867188  
7,1,3925.786585  
7,1,81428.812500  
7,1,2669.823529  
7,1,4705.391026  
7,1,2612.889706  
7,1,20245.573171  
7,1,3075.186047  
7,1,2462.428571  
7,1,4829.551282  
7,1,25604.919355  
7,1,2833.378289  
7,1,19785.816860  
7,1,5012.088235  
7,1,2594.190217  
7,1,1786.785714  
7,1,6822.416667  
7,1,2970.042553  
7,1,3906.894444  
7,1,2025.416667  
7,1,2520.804054  
7,1,2065.256250  
7,1,6619.145833  
7,1,93983.687500  
7,1,17842.958333  
7,1,2209.736702  
7,1,3937.880952  
7,1,4985.597826  
7,1,57111.107143  
7,1,5563.319149  
7,1,1541.750000  
7,1,4613.997283  
7,1,18484.511111  
7,1,76011.261905  
7,1,11016.580645  
7,1,10068.775000  
7,1,1515.750000  
7,1,63825.250000  
7,1,1842.250000  
7,1,44771.315476  
7,1,3491.781250  
7,1,30557.428571  
7,1,3359.456522  
7,1,1683.440341  
7,1,7850.340909  
7,1,121399.500000  
7,1,3570.062500  
7,1,38662.500000  
7,1,6644.906250  
7,1,33981.275943  
7,1,1537.144737

7,1,1867.238636  
7,1,20116.154412  
7,1,2362.291667  
7,1,11789.530172  
7,1,9068.581395  
7,1,6515.540698  
7,1,2512.703488  
7,1,3385.336735  
7,1,1644.693182  
7,1,5845.980769  
7,1,2189.621711  
7,1,2110.796196  
7,1,2326.520000  
7,1,4392.271341  
7,1,42446.964286  
7,1,2649.406250  
7,1,1514.016667  
7,1,2715.486111  
7,1,1506.523810  
7,1,1528.375000  
7,1,2750.861702  
7,1,4138.579268  
7,1,34655.541667  
7,1,2005.075000  
7,1,1600.576220  
7,1,2252.345238  
7,1,131584.465909  
7,1,3614.132143  
7,1,1530.005682  
7,1,2732.780556  
7,1,22952.450000  
7,1,11850.125000  
7,1,69058.866279  
7,1,61477.510000  
7,1,1525.485714  
7,1,2339.611486  
7,1,1556.098404  
7,1,6791.791667  
7,1,2175.800000  
7,1,2747.000000  
7,1,6406.787234  
7,1,4316.864865  
7,1,33829.088710  
7,1,1984.585106  
7,1,11871.579082  
7,1,66135.232558  
7,1,2558.234043  
7,1,2654.725806  
7,1,2868.630102  
7,1,7464.236842  
7,1,5483.039894  
7,1,2352.614583  
7,1,74719.053125  
7,1,2031.905405  
7,1,1894.945946  
7,1,7036.584559  
7,1,2688.500000  
7,1,2748.581395  
7,1,5072.610465  
7,1,32342.204918  
7,1,24288.670732  
7,1,60975.904412  
7,1,1511.213068  
7,1,1816.307927  
7,1,64251.142857  
7,1,54512.180556

7,1,2293.314655  
7,1,3308.673913  
7,1,1882.115385  
7,1,175906.743750  
7,1,10450.078125  
7,1,1655.526786  
7,1,1614.593750  
7,1,19706.336207  
7,1,1733.963415  
7,1,2007.340426  
7,1,68880.390625  
7,1,5180.823529  
7,1,1668.489796  
7,1,24797.687500  
7,1,3131.860577  
7,1,2790.895349  
7,1,11522.275000  
7,1,2044.723837  
7,1,1936.295455  
7,1,1526.233553  
7,1,11469.769022  
7,1,2252.875000  
7,1,1798.750000  
7,1,25844.926471  
7,1,2443.263889  
7,1,28779.866935  
7,1,5218.981481  
7,1,63000.897436  
7,1,43206.314516  
7,1,4267.915625  
7,1,4645.616071  
7,1,82561.101190  
7,1,54930.171053  
7,1,2010.991848  
7,1,1721.000000  
7,1,44898.750000  
7,1,2044.475000  
7,1,2468.290761  
7,1,1505.245000  
7,1,83813.500000  
7,1,2983.789773  
7,1,2687.612981  
7,1,75648.986111  
7,1,1799.368421  
7,1,6918.005319  
7,1,7244.437500  
7,1,1889.277778  
7,1,8469.638298  
7,1,31211.458333  
7,1,1827.582386  
7,1,2485.730263  
7,1,1861.411765  
7,1,1725.045455  
7,1,2129.878378  
7,1,2103.775000  
7,1,2217.348837  
7,1,3462.704861  
7,1,56407.011364  
7,1,51592.554054  
7,1,2231.522727  
7,1,1582.195122  
7,1,2502.954286  
7,1,6717.744186  
7,1,1829.801630  
7,1,3169.074074  
7,1,2520.103774

7,1,2982.347561  
7,1,31900.065341  
7,1,32991.227053  
7,1,2956.667969  
7,1,11968.937500  
7,1,1628.468750  
7,1,8933.625000  
7,1,2506.548913  
7,1,1648.372159  
7,1,1922.121951  
7,1,2453.255319  
7,1,1991.398649  
7,1,39073.993243  
7,1,2306.214286  
7,1,1629.507812  
7,1,1688.846939  
7,1,11877.617647  
7,1,5013.452381  
7,1,5154.923913  
7,1,3458.128049  
7,1,1655.971154  
7,1,13487.343023  
7,1,2168.464286  
7,1,9077.829861  
7,1,58197.662162  
7,1,36354.197368  
7,1,1547.138889  
7,1,1723.166667  
7,1,6543.910000  
7,1,10639.600000  
7,1,67937.756098  
7,1,1552.928571  
7,1,7398.304348  
7,1,1726.967105  
7,1,6356.531250  
7,1,1675.062500  
7,1,4804.615385  
7,1,2612.732500  
7,1,4305.418919  
7,1,2806.027778  
7,1,1969.750000  
7,1,3156.157609  
7,1,3543.654762  
7,1,4578.101744  
7,1,1715.250000  
7,1,1777.453704  
7,1,2156.890625  
7,1,1520.287234  
7,1,2896.358108  
7,1,5990.390625  
7,1,13829.614362  
7,1,3615.875000  
7,1,11239.518382  
7,1,7536.323529  
7,1,5773.000000  
7,1,27385.572581  
7,1,2729.009375  
7,1,3403.191489  
7,1,1582.694149  
7,1,46527.742188  
7,1,5230.544643  
7,1,40220.173077  
7,1,9017.218750  
7,1,2657.826613  
7,1,44751.071429  
7,1,2235.647727

7,1,15242.470588  
7,1,1742.543750  
7,1,87117.795455  
7,1,2077.534884  
7,1,2981.209239  
7,1,8091.275000  
7,1,93682.520833  
7,1,6528.219512  
7,1,1698.239521  
7,1,2515.634868  
7,1,1526.763158  
7,1,3200.483696  
7,1,1565.638889  
7,1,1502.505208  
7,1,5153.065625  
7,1,2586.511628  
7,1,97820.585526  
7,1,2748.477273  
7,1,1773.951087  
7,1,53078.712838  
7,1,1900.706250  
7,1,1669.761628  
7,1,2122.442857  
7,1,2804.642157  
7,1,1746.305556  
7,1,8133.732143  
7,1,42622.885135  
7,1,5022.375000  
7,1,3406.512658  
7,1,2485.354167  
7,1,2785.409091  
7,1,23159.750000  
7,1,1720.425000  
7,1,3463.970238  
7,1,7059.375000  
7,1,4255.709302  
7,1,1628.059783  
7,1,2346.414634  
7,1,13577.979592  
7,1,2639.920213  
7,1,79886.731250  
7,1,6061.466837  
7,1,17449.593750  
7,1,1716.250000  
7,1,31653.094595  
7,1,3913.336735  
7,1,81739.426282  
7,1,53485.365385  
7,1,4411.338415  
7,1,29703.666667  
7,1,3097.864865  
7,1,1889.776163  
7,1,197312.910326  
7,1,3646.186170  
7,1,2867.485000  
7,1,3332.363636  
7,1,1569.265957  
7,1,85705.115385  
7,1,2346.582386  
7,1,2357.019231  
7,1,7288.860119  
7,1,3313.194196  
7,1,12414.662791  
7,1,1527.795918  
7,1,18455.217949  
7,1,1795.875000

7,1,90018.282609  
7,1,1995.448980  
7,1,25616.159091  
7,1,1668.000000  
7,1,6984.468750  
7,1,2618.975610  
7,1,1887.562500  
7,1,3865.247283  
7,1,3737.218750  
7,1,2323.988636  
7,1,1890.166667  
7,1,3705.269231  
7,1,1647.152439  
7,1,2175.259146  
7,1,5544.051020  
7,1,2175.861486  
7,1,2953.281250  
7,1,1537.396277  
7,1,2018.316667  
7,1,6147.642857  
7,1,1852.113636  
7,1,3123.739865  
7,1,36400.648026  
7,1,29245.482143  
7,1,1988.867021  
7,1,25809.727941  
7,1,7715.065000  
7,1,1630.353261  
7,1,67120.482143  
7,1,3151.300000  
7,1,7624.011364  
7,1,8388.603659  
7,1,3616.875000  
7,1,3312.710106  
7,1,2761.920000  
7,1,34766.268382  
7,1,1663.708333  
7,1,2067.443452  
7,1,2543.739130  
7,1,44504.076923  
7,1,2256.488636  
7,1,1545.402778  
7,1,9340.829545  
7,1,2073.838235  
7,1,2166.378289  
7,1,2583.945652  
7,1,157484.703488  
7,1,2123.454545  
7,1,3134.658537  
7,1,34678.517241  
7,1,4052.166667  
7,1,3035.416667  
7,1,11733.829545  
7,1,2946.913043  
7,1,2858.785714  
7,1,3531.108696  
7,1,1693.116071  
7,1,4151.741071  
7,1,3225.584302  
7,1,39489.285714  
7,1,3295.406250  
7,1,2635.630435  
7,1,2012.050000  
7,1,4118.898438  
7,1,3998.420455  
7,1,18342.625000

7,1,10268.692308  
7,1,17796.563830  
7,1,46377.243902  
7,1,1944.720930  
7,1,3931.891892  
7,1,1957.765625  
7,1,1979.007353  
7,1,2895.384615  
7,1,1504.910714  
7,1,1612.401163  
7,1,3231.238095  
7,1,6829.940476  
7,1,5759.281250  
7,1,1569.554688  
7,1,1629.850000  
7,1,1909.403226  
7,1,2023.541667  
7,1,4180.333333  
7,1,3022.111111  
7,1,3259.950521  
7,1,15137.951705  
7,1,20439.000000  
7,1,55854.487500  
7,1,4559.328947  
7,1,9899.864796  
7,1,2395.534884  
7,1,46640.325658  
7,1,2310.000000  
7,1,8674.403846  
7,1,96153.575000  
7,1,1836.935606  
7,1,1707.538462  
7,1,2077.991071  
7,1,2161.473404  
7,1,8992.248571  
7,1,153226.706522  
7,1,8005.039062  
7,1,3157.395270  
7,1,2370.488372  
7,1,1500.000000  
7,1,1772.372449  
7,1,5507.369565  
7,1,2576.812500  
7,1,2619.253289  
7,1,2368.041667  
7,1,2003.342105  
7,1,15048.518293  
7,1,9955.022727  
7,1,2264.000000  
7,1,1521.549479  
7,1,16080.077381  
7,1,1795.515625  
7,1,1568.903061  
7,1,36323.856618  
7,1,4847.835294  
7,1,2216.750000  
7,1,5575.469274  
7,1,19820.500000  
7,1,4004.795455  
7,1,15801.000000  
7,1,2602.700000  
7,1,3622.148936  
7,1,1525.279412  
7,1,9632.188312  
7,1,2111.987179  
7,1,17690.794118

7,1,3046.131410  
7,1,30589.987805  
7,1,29214.014706  
7,1,4402.541667  
7,1,1865.725610  
7,1,4555.574074  
7,1,13509.345109  
7,1,2375.250000  
7,1,4429.964286  
7,1,2309.929487  
7,1,9660.383152  
7,1,2520.053571  
7,1,43475.970588  
7,1,6502.500000  
7,1,2193.447368  
7,1,57512.414634  
7,1,8043.500000  
7,1,21812.000000  
7,1,2148.307692  
7,1,4522.556548  
7,1,4889.522222  
7,1,2948.278443  
7,1,3735.457143  
7,1,3295.000000  
7,1,4630.080128  
7,1,67925.852273  
7,1,4680.212209  
7,1,4918.142857  
7,1,34269.658537  
7,1,1737.193182  
7,1,1727.167683  
7,1,2106.813830  
7,1,5261.899306  
7,1,1883.404255  
7,1,3390.102564  
7,1,2854.009615  
7,1,38720.590909  
7,1,47147.625000  
7,1,1511.580000  
7,1,7400.513514  
7,1,52028.273973  
7,1,35261.215625  
7,1,2082.965278  
7,1,2658.104651  
7,1,19632.181250  
7,1,4031.584677  
7,1,3416.515957  
7,1,2884.711111  
7,1,29586.650000  
7,1,113077.413043  
7,1,35554.859375  
7,1,1624.752907  
7,1,4096.602041  
7,1,9443.888158  
7,1,2709.921053  
7,1,7360.482843  
7,1,60485.450000  
7,1,2721.081250  
7,1,18551.290000  
7,1,2775.770833  
7,1,3908.185811  
7,1,5112.615385  
7,1,3866.164286  
7,1,17510.224265  
7,1,3353.395349  
7,1,1959.750000

7,1,4531.428571  
7,1,10970.346154  
7,1,75546.184375  
7,1,1923.772436  
7,1,6075.217391  
7,1,2982.539062  
7,1,20383.612179  
7,1,4593.447500  
7,1,16945.000000  
7,1,1535.346154  
7,1,1861.829268  
7,1,1644.268293  
7,1,2047.511905  
7,1,5460.696429  
7,1,6051.750000  
7,1,1519.581081  
7,1,5038.282609  
7,1,1647.609195  
7,1,3325.299242  
7,1,1968.650000  
7,1,4638.385417  
7,1,12620.590909  
7,1,3427.571429  
7,1,1857.405405  
7,1,1763.059783  
7,1,2568.250000  
7,1,9095.826087  
7,1,1953.488095  
7,1,1808.808511  
7,1,40173.143939  
7,1,58164.898649  
7,1,1646.952500  
7,1,72984.422794  
7,1,1633.682432  
7,1,16810.700000  
7,1,1910.413462  
7,1,3218.150000  
7,1,1517.906977  
7,1,2971.781250  
7,1,4410.968750  
7,1,3477.593750  
7,1,30064.734375  
7,1,2558.977941  
7,1,5084.959184  
7,1,2670.295732  
7,1,30546.109375  
7,1,20716.203125  
7,1,2168.021739  
7,1,140025.753927  
7,1,25504.424419  
7,1,15692.699219  
7,1,2397.819767  
7,1,6365.215116  
7,1,1614.763587  
7,1,3756.368421  
7,1,1518.844937  
7,1,13143.575758  
7,1,1844.679054  
7,1,3673.725490  
7,1,3531.500000  
7,1,4807.371951  
7,1,2544.229167  
7,1,4365.039773  
7,1,2525.162234  
7,1,4917.925000  
7,1,1581.397727

7,1,3159.148936  
7,1,34748.419355  
7,1,17557.109375  
7,1,31393.797619  
7,1,2684.488372  
7,1,5811.481061  
7,1,3655.284091  
7,1,2274.110000  
7,1,1592.575000  
7,1,2387.477564  
7,1,3367.836735  
7,1,12263.773810  
7,1,2600.807500  
7,1,3183.453125  
7,1,2963.154255  
7,1,1704.675000  
7,1,2416.178571  
8,2,2150.127660  
8,2,2033.927083  
8,2,7232.916667  
8,2,6350.361979  
8,2,1602.700521  
8,2,5703.838816  
8,2,1557.381250  
8,2,3015.363095  
8,2,5239.993421  
8,2,2617.942308  
8,2,1686.848837  
8,2,2030.606707  
8,2,3989.247788  
8,2,1717.785714  
8,2,2803.363636  
8,2,2057.835366  
8,2,8204.685393  
8,2,3590.765244  
8,2,3726.960000  
8,2,1738.559524  
8,2,1972.267045  
8,2,4664.761111  
8,2,2039.560976  
8,2,2587.310897  
8,2,7517.802083  
8,2,3860.552632  
8,2,2648.934211  
8,2,2010.452880  
8,2,7147.147321  
8,2,3804.418269  
8,2,1956.578818  
8,2,1893.886364  
8,2,2111.478261  
8,2,1761.163522  
8,2,2991.293478  
8,2,4205.875000  
8,2,6143.529891  
8,2,3365.575000  
8,2,2561.684211  
8,2,2560.031915  
8,2,3165.335714  
8,2,3742.433036  
8,2,2974.541667  
8,2,3547.110000  
8,2,1939.851351  
8,2,3426.392857  
8,2,2652.255952  
8,2,3211.984375  
8,2,2009.393617

8,2,2601.303977  
8,2,1704.094595  
8,2,2863.093750  
8,2,2198.494048  
8,2,4248.708333  
8,2,9242.005000  
8,2,1644.184211  
8,2,5580.067568  
8,2,2968.583333  
8,2,2603.071429  
8,2,14196.562500  
8,2,1718.529412  
8,2,2354.282609  
8,2,3823.102273  
8,2,6250.819672  
8,2,2267.873786  
8,2,5218.413793  
8,2,1904.898876  
8,2,5574.154545  
8,2,3718.562500  
8,2,1812.162921  
8,2,6545.937500  
8,2,1536.843373  
8,2,3650.544271  
8,2,2041.214286  
8,2,5939.154255  
8,2,3394.875000  
8,2,7797.967391  
8,2,2221.027778  
8,2,1633.941176  
8,2,1933.470588  
8,2,7591.653333  
8,2,1975.796875  
8,2,3786.148810  
8,2,2330.097222  
8,2,12730.706818  
8,2,3269.095395  
8,2,11759.883721  
8,2,1510.150000  
8,2,2973.828947  
8,2,1641.729167  
8,2,3050.304878  
8,2,1774.110429  
8,2,6961.727679  
8,2,2854.375000  
8,2,2776.369444  
8,2,12956.366228  
8,2,5027.847727  
8,2,2392.711538  
8,2,4636.798295  
8,2,4752.527027  
8,2,4536.781977  
8,2,3249.173469  
8,2,6097.570312  
8,2,11810.135417  
8,2,4696.067708  
8,2,2110.769022  
8,2,1904.117021  
8,2,1934.355263  
8,2,1609.609375  
8,2,3410.408163  
8,2,2135.401163  
8,2,2389.250000  
8,2,9187.701389  
8,2,1965.927632  
8,2,21519.261792

8,2,2152.454545  
8,2,3777.625000  
8,2,1536.667553  
8,2,3658.371951  
8,2,3669.528409  
8,2,3064.500000  
8,2,2955.600000  
8,2,3315.323718  
8,2,1585.050000  
8,2,3238.096154  
8,2,2570.750000  
8,2,6991.690104  
8,2,2044.690104  
8,2,2821.854167  
8,2,6377.250000  
8,2,8295.493274  
8,2,6068.449664  
8,2,3152.146277  
8,2,2224.404494  
8,2,4464.790698  
8,2,2224.638298  
8,2,2368.331933  
8,2,2524.767442  
8,2,4232.787879  
8,2,3365.085526  
8,2,6806.444444  
8,2,2029.578431  
8,2,3498.309524  
8,2,2542.068750  
8,2,3226.750000  
8,2,14453.807175  
8,2,1904.336735  
8,2,4789.975000  
8,2,4411.980769  
8,2,4988.693878  
8,2,4545.563889  
8,2,1711.665698  
8,2,4164.478774  
8,2,7506.959184  
8,2,1751.562500  
8,2,3061.079545  
8,2,1869.400943  
8,2,5979.949519  
8,2,2834.695652  
8,2,3014.306548  
8,2,4376.957317  
8,2,4864.720930  
8,2,1551.433333  
8,2,3272.000000  
8,2,5107.929688  
8,2,2208.418605  
8,2,2325.409091  
8,2,2388.846154  
8,2,2556.320000  
8,2,2802.025000  
8,2,4134.416667  
8,2,2771.300000  
8,2,4353.784722  
8,2,7172.849359  
8,2,1843.982143  
8,2,3863.584302  
8,2,4132.160714  
8,2,3513.534091  
8,2,2385.648649  
8,2,2119.775510  
8,2,1755.315789

8,2,2224.261364  
8,2,5532.269886  
8,2,2418.975000  
8,2,2790.194444  
8,2,6440.552500  
8,2,8651.385135  
8,2,1819.887500  
8,2,6693.491935  
8,2,6524.765152  
8,2,1972.773810  
8,2,3012.602273  
8,2,1686.539007  
8,2,2408.720109  
8,2,1851.465116  
8,2,6392.583333  
8,2,2303.331395  
8,2,2215.202778  
8,2,1519.166667  
8,2,2474.600000  
8,2,10399.576271  
8,2,3285.152027  
8,2,2147.027778  
8,2,1745.522727  
8,2,2432.581633  
8,2,4144.717262  
8,2,2755.700000  
8,2,5436.025126  
8,2,3272.628289  
8,2,1533.677632  
8,2,5998.029412  
8,2,2037.666667  
8,2,5900.394886  
8,2,8021.357143  
8,2,6267.000000  
8,2,3616.696133  
8,2,1950.475962  
8,2,2100.682927  
8,2,2314.718232  
8,2,1738.561181  
8,2,2687.942308  
8,2,4734.975806  
8,2,2313.040698  
8,2,1713.795455  
8,2,5155.910377  
8,2,1552.592105  
8,2,4449.241071  
8,2,4210.054054  
8,2,1757.190476  
8,2,1648.365922  
8,2,4944.581395  
8,2,2214.181548  
8,2,3681.435000  
8,2,3337.057692  
8,2,3017.390244  
8,2,2004.633333  
8,2,6660.824074  
8,2,1640.390244  
8,2,5399.383721  
8,2,3627.531915  
8,2,2113.040865  
8,2,2189.132353  
8,2,1998.205882  
8,2,2142.246988  
8,2,2180.500000  
8,2,2833.508929  
8,2,1524.333333

8,2,54187.850610  
8,2,3637.086957  
8,2,4911.463415  
8,2,7196.553571  
8,2,9280.810547  
8,2,2369.433962  
8,2,4732.856707  
8,2,1554.154412  
8,2,1539.744048  
8,2,1793.082317  
8,2,3356.722826  
8,2,4258.255319  
8,2,8778.006098  
8,2,1660.932692  
8,2,5336.177273  
8,2,4028.686047  
8,2,3550.868750  
8,2,2968.875000  
8,2,8717.081250  
8,2,2852.883721  
8,2,3299.442935  
8,2,10659.147727  
8,2,6110.480769  
8,2,10096.928571  
8,2,1622.750000  
8,2,3759.015152  
8,2,8351.044872  
8,2,3050.609091  
8,2,2450.367647  
8,2,6285.042553  
8,2,2810.000000  
8,2,2070.333333  
8,2,1568.221591  
8,2,4673.696429  
8,2,1845.670854  
8,2,1679.192308  
8,2,2270.357955  
8,2,1883.470833  
8,2,4006.474359  
8,2,6369.713942  
8,2,2266.101852  
8,2,1634.577500  
8,2,5753.572222  
8,2,2411.979592  
8,2,4886.276730  
8,2,2563.505814  
8,2,3690.094340  
8,2,2243.855114  
8,2,1576.559211  
8,2,1550.118750  
8,2,1500.404605  
8,2,1537.112500  
8,2,1934.200000  
8,2,6239.721429  
8,2,2330.230114  
8,2,5303.471939  
8,2,2323.070988  
8,2,6075.062500  
8,2,2093.109375  
8,2,4734.888298  
8,2,6906.790816  
8,2,1584.576159  
8,2,7917.111111  
8,2,1825.383721  
8,2,2995.280303  
8,2,2459.298429

8,2,5558.432065  
8,2,3188.050532  
8,2,3418.460938  
8,2,1796.471354  
8,2,3657.980392  
8,2,13207.218750  
8,2,1819.562500  
8,2,3251.120000  
8,2,2053.000000  
8,2,5959.428571  
8,2,3975.978723  
8,2,4974.461538  
8,2,4495.173913  
8,2,4842.974359  
8,2,1956.173611  
8,2,5105.476190  
8,2,4755.591667  
8,2,4347.054348  
8,2,2052.000000  
8,2,3606.230769  
8,2,3016.693878  
8,2,6671.771429  
8,2,3183.409091  
8,2,1585.279070  
8,2,2074.977778  
8,2,1607.295732  
8,2,21999.474576  
8,2,2702.243902  
8,2,1543.558333  
8,2,1989.816327  
8,2,1673.554348  
8,2,2832.075000  
8,2,1771.382212  
8,2,7525.945161  
8,2,2840.600000  
8,2,3619.612903  
8,2,1764.005000  
8,2,9124.125000  
8,2,2333.256757  
8,2,1542.110429  
8,2,8127.972603  
8,2,3308.329787  
8,2,20944.000000  
8,2,8040.005682  
8,2,1647.781437  
8,2,3345.612245  
8,2,2530.897727  
8,2,1668.877841  
8,2,4806.610294  
8,2,3765.240909  
8,2,2160.567308  
8,2,1562.343750  
8,2,7037.911458  
8,2,1774.787736  
8,2,4710.822917  
8,2,2418.225694  
8,2,5567.085106  
8,2,3140.637500  
8,2,4493.861111  
8,2,5455.664894  
8,2,2805.615385  
8,2,4105.620000  
8,2,45111.604027  
8,2,3252.024823  
8,2,2795.854167  
8,2,13021.589286

8,2,2088.050000  
8,2,2895.625000  
8,2,3518.773707  
8,2,6836.714286  
8,2,1669.853723  
8,2,3793.441489  
8,2,1596.775000  
8,2,1652.810714  
8,2,1836.075000  
8,2,1664.551020  
8,2,2408.093023  
8,2,3627.457447  
8,2,1573.186224  
8,2,2585.614865  
8,2,2653.937500  
8,2,9948.677966  
8,2,1670.675000  
8,2,5891.340909  
8,2,6299.000000  
8,2,3256.241848  
8,2,2752.967391  
8,2,8868.188462  
8,2,3364.250000  
8,2,2468.403846  
8,2,1654.217742  
8,2,3039.435897  
8,2,2698.526316  
8,2,4485.365269  
8,2,3680.810811  
8,2,2869.544118  
8,2,2548.592593  
8,2,2371.898810  
8,2,4119.968750  
8,2,3941.325000  
8,2,2064.000000  
8,2,3751.995370  
8,2,2685.053571  
8,2,10642.333333  
8,2,3853.072222  
8,2,2632.965909  
8,2,1827.886364  
8,2,1855.094340  
8,2,1780.006410  
8,2,4563.250000  
8,2,1785.857143  
8,2,2816.271930  
8,2,4872.964286  
8,2,5159.826087  
8,2,14116.222222  
8,2,1961.833333  
8,2,4324.417749  
8,2,4682.833333  
8,2,1962.536458  
8,2,4797.105263  
8,2,2448.851190  
8,2,3570.053191  
8,2,3619.000000  
8,2,9086.637681  
8,2,3561.825472  
8,2,1802.797872  
8,2,2143.377246  
8,2,3479.380814  
8,2,4080.691860  
8,2,1853.630814  
8,2,1775.354592  
8,2,3112.209135

8,2,1926.805233  
8,2,2349.235577  
8,2,3696.475000  
8,2,4208.625000  
8,2,2468.661765  
8,2,4234.642857  
8,2,1931.050000  
8,2,1705.037234  
8,2,4173.994318  
8,2,5037.875000  
8,2,1898.090278  
8,2,3928.075000  
8,2,3829.055288  
8,2,1549.297872  
8,2,2672.354271  
8,2,3773.850962  
8,2,2060.629630  
8,2,1801.137931  
8,2,1842.755319  
8,2,1549.076923  
8,2,1772.265625  
8,2,1727.000000  
8,2,5773.206522  
8,2,4038.363636  
8,2,1582.590909  
8,2,1920.580000  
8,2,1984.601852  
8,2,1869.935714  
8,2,1972.541667  
8,2,5094.054217  
8,2,3050.972093  
8,2,18125.837209  
8,2,2971.781977  
8,2,1960.304348  
8,2,3826.233333  
8,2,1507.818878  
8,2,5796.948864  
8,2,1988.541667  
8,2,2391.584375  
8,2,2785.087838  
8,2,2147.126667  
8,2,2301.650000  
8,2,2697.106250  
8,2,9755.500000  
8,2,2777.540323  
8,2,2644.572917  
8,2,1676.777778  
8,2,5113.255319  
8,2,5134.875000  
8,2,6174.390000  
8,2,3109.865000  
8,2,2858.875000  
8,2,2701.437500  
8,2,2752.521472  
8,2,4608.000000  
8,2,3950.612500  
8,2,2709.162791  
8,2,2975.636364  
8,2,5566.000000  
8,2,3393.528846  
8,2,4591.555556  
8,2,12998.580000  
8,2,6521.958333  
8,2,9778.062500  
8,2,2046.700000  
8,2,2455.750000

8,2,2602.262195  
8,2,3620.882353  
8,2,6020.827830  
8,2,4648.275510  
8,2,1992.869898  
8,2,2989.715426  
8,2,10715.013298  
8,2,3710.091146  
8,2,2078.922156  
8,2,2080.461957  
8,2,1562.712500  
8,2,1797.113636  
8,2,4151.484375  
8,2,1652.053571  
8,2,3605.603659  
8,2,6826.426630  
8,2,9463.703125  
8,2,4156.000000  
8,2,2559.648026  
8,2,2170.593137  
8,2,4665.500000  
8,2,4404.177326  
8,2,5991.750000  
8,2,3622.591133  
8,2,1700.524272  
8,2,3319.959302  
8,2,3713.566265  
8,2,2375.809375  
8,2,3281.700000  
8,2,4472.361809  
8,2,8404.790816  
8,2,1531.596859  
8,2,4171.210526  
8,2,2537.780488  
8,2,1528.688953  
8,2,4110.666667  
8,2,1614.057143  
8,2,5729.782609  
8,2,5682.960784  
8,2,2557.656250  
8,2,1503.156627  
8,2,3367.178125  
8,2,1856.190000  
8,2,2929.950000  
8,2,2060.125000  
8,2,2344.517857  
8,2,4828.230556  
8,2,1554.208333  
8,2,3357.770000  
8,2,4816.790323  
8,2,1754.600000  
8,2,6338.250000  
8,2,3873.081081  
8,2,6247.980978  
8,2,4445.898707  
8,2,6919.319767  
8,2,5916.848214  
8,2,4202.631579  
8,2,3156.853659  
8,2,6462.890547  
8,2,2192.993421  
8,2,12700.352381  
8,2,2506.000000  
8,2,6829.142857  
8,2,1615.615385  
8,2,4251.752358

8,2,3432.341837  
8,2,1505.592105  
8,2,8268.579861  
8,2,2091.301471  
8,2,2395.783019  
8,2,5594.678571  
8,2,2867.767500  
8,2,17530.947917  
8,2,3008.522059  
8,2,1966.500000  
8,2,3766.566489  
8,2,8474.083682  
8,2,11174.475936  
8,2,12751.380682  
8,2,2456.617021  
8,2,8139.420732  
8,2,7156.493776  
8,2,2126.324324  
8,2,2077.412500  
8,2,3056.500000  
8,2,2775.193627  
8,2,3176.259615  
8,2,5349.634146  
8,2,2118.804878  
8,2,3022.000000  
8,2,5255.691489  
8,2,2834.733333  
8,2,2905.030612  
8,2,1648.644444  
8,2,1908.708333  
8,2,2483.593750  
8,2,1742.964912  
8,2,10865.555000  
8,2,1824.988372  
8,2,8367.392442  
8,2,4564.348837  
8,2,4566.625000  
8,2,12496.663265  
8,2,2936.823864  
8,2,18222.788043  
8,2,1987.250000  
8,2,1547.140000  
8,2,2529.666667  
8,2,2260.724490  
8,2,7764.904762  
8,2,2129.818750  
8,2,9160.085000  
8,2,3079.640244  
8,2,4412.488208  
8,2,1772.575000  
8,2,11116.201389  
8,2,10182.377698  
8,2,2267.836957  
8,2,3049.850610  
8,2,4298.289894  
8,2,2932.225000  
8,2,7491.611702  
8,2,5683.230114  
8,2,2121.798780  
8,2,3673.541667  
8,2,2067.780488  
8,2,1953.317073  
8,2,1648.555556  
8,2,1600.362245  
8,2,5975.465909  
8,2,5521.232227

8,2,4314.109649  
8,2,4608.121951  
8,2,3676.727273  
8,2,4590.640625  
8,2,3089.778125  
8,2,1989.272727  
8,2,1978.217391  
8,2,6979.842105  
8,2,3897.225806  
8,2,2703.230769  
8,2,1620.906250  
8,2,5801.054054  
8,2,5645.619469  
8,2,2142.065217  
8,2,5645.859375  
8,2,2553.918675  
8,2,2882.784753  
8,2,5818.397059  
8,2,9708.125000  
8,2,16096.686047  
8,2,2001.579545  
8,2,2133.350000  
8,2,4451.600000  
8,2,8697.194444  
8,2,1588.409091  
8,2,3889.380435  
8,2,3661.333333  
8,2,3300.656250  
8,2,3494.615854  
8,2,7622.668675  
8,2,4169.185841  
8,2,5043.383495  
8,2,2539.257353  
8,2,2266.402439  
8,2,2580.500000  
8,2,2365.159375  
8,2,2276.418750  
8,2,7545.964844  
8,2,1864.250000  
8,2,3133.800000  
8,2,2189.793478  
8,2,1949.564286  
8,2,1846.351163  
8,2,7551.504566  
8,2,6441.718750  
8,2,1571.709821  
8,2,30374.608553  
8,2,1520.267045  
8,2,5571.855769  
8,2,3496.226190  
8,2,3587.644737  
8,2,3964.619444  
8,2,5124.364583  
8,2,2571.600000  
8,2,1561.263889  
8,2,6891.569444  
8,2,4727.325581  
8,2,4581.880952  
8,2,1854.731707  
8,2,1843.980769  
8,2,1695.401786  
8,2,1728.893617  
8,2,7103.944444  
8,2,1981.326220  
8,2,2349.784091  
8,2,3002.459459

8,2,1562.840625  
8,2,3468.057065  
8,2,1882.358974  
8,2,2679.178977  
8,2,1503.250000  
8,2,4526.909091  
8,2,7907.930851  
8,2,10358.044643  
8,2,1778.130319  
8,2,3451.666667  
8,2,6698.971154  
8,2,1653.093750  
8,2,19910.038462  
8,2,6179.238938  
8,2,8888.267241  
8,2,6199.384615  
8,2,3637.097561  
8,2,4509.921512  
8,2,1978.005000  
8,2,11116.186047  
8,2,2109.277778  
8,2,2074.675000  
8,2,6972.470238  
8,2,2759.282051  
8,2,8050.654255  
8,2,3649.439815  
8,2,2658.100000  
8,2,7477.507463  
8,2,5717.670732  
8,2,1526.154255  
8,2,3163.916667  
8,2,2860.769886  
8,2,3442.387500  
8,2,2452.845361  
8,2,2681.434483  
8,2,16622.777778  
8,2,2615.479167  
8,2,3854.174863  
8,2,5047.629808  
8,2,1880.620536  
8,2,4159.300000  
8,2,1916.203125  
8,2,13586.013889  
8,2,1871.971154  
8,2,2444.898936  
8,2,8924.085106  
8,2,15857.056410  
8,2,2528.338235  
8,2,2230.010929  
8,2,4783.166667  
8,2,1976.393229  
8,2,1609.315789  
8,2,5216.794643  
8,2,1499.243590  
8,2,1824.125000  
8,2,1578.150000  
8,2,2097.165761  
8,2,4754.860577  
8,2,2753.028571  
8,2,5325.000000  
8,2,4115.677273  
8,2,5650.480000  
8,2,6441.301676  
8,2,3809.006818  
8,2,1982.733333  
8,2,2395.867347

8,2,6226.511628  
8,2,4818.109375  
8,2,2393.215909  
8,2,3720.424020  
8,2,3253.954545  
8,2,2256.875000  
8,2,4103.299419  
8,2,2750.750000  
8,2,2979.970109  
8,2,11332.603365  
8,2,4039.468137  
8,2,2659.973404  
8,2,3310.914439  
8,2,4580.956731  
8,2,5241.694444  
8,2,1552.454787  
8,2,3680.093750  
8,2,7474.475000  
8,2,3159.050000  
8,2,3279.015625  
8,2,14399.000000  
8,2,1760.893617  
8,2,2035.271739  
8,2,2284.288462  
8,2,3230.875000  
8,2,2300.654762  
8,2,1597.266667  
8,2,2091.190625  
8,2,2378.953125  
8,2,9260.201923  
8,2,1749.948864  
8,2,3161.682692  
8,2,9453.777174  
8,2,2659.625000  
8,2,2241.191860  
8,2,4205.992021  
8,2,4511.625000  
8,2,3221.841216  
8,2,1927.750000  
8,2,3290.684896  
8,2,1842.393939  
8,2,1632.598039  
8,2,3001.517442  
8,2,2168.503378  
8,2,6829.015000  
8,2,3834.170213  
8,2,1917.151163  
8,2,2389.885638  
8,2,4234.510204  
8,2,3861.692308  
8,2,1906.600000  
8,2,3814.865385  
8,2,8124.642857  
8,2,3179.375000  
8,2,2487.768293  
8,2,2457.045455  
8,2,1935.871711  
8,2,2318.831731  
8,2,9661.455882  
8,2,1532.039062  
8,2,4228.125000  
8,2,2649.829545  
8,2,2561.562500  
8,2,3352.468085  
8,2,2814.884615  
8,2,2334.097561

8,2,5677.745614  
8,2,6105.678571  
8,2,10773.015873  
8,2,3386.421053  
8,2,3564.959459  
8,2,2490.196429  
8,2,1504.386364  
8,2,6939.455128  
8,2,10245.239583  
8,2,3520.586538  
8,2,2001.562500  
8,2,2675.062500  
8,2,2560.526882  
8,2,1859.041667  
8,2,2678.519886  
8,2,3258.914894  
8,2,4401.375000  
8,2,1890.838068  
8,2,3262.851064  
8,2,1733.052326  
8,2,3373.466667  
8,2,6540.200000  
8,2,4082.113636  
8,2,1759.098837  
8,2,1862.542553  
8,2,5615.031250  
8,2,1660.985795  
8,2,4557.000000  
8,2,1524.160714  
8,2,6069.425150  
8,2,2682.473214  
8,2,3941.272727  
8,2,2021.950000  
8,2,7090.826705  
8,2,3067.652174  
8,2,1780.174419  
8,2,2570.630000  
8,2,1542.268939  
8,2,6200.009434  
8,2,6321.843750  
8,2,2002.332386  
8,2,8503.000000  
8,2,2946.450000  
8,2,2095.777174  
8,2,1865.733333  
8,2,1813.936170  
8,2,2525.319149  
8,2,4276.762295  
8,2,19739.152027  
8,2,2900.203488  
8,2,1704.176471  
8,2,1729.485714  
8,2,6610.179688  
8,2,4263.842391  
8,2,2218.627660  
8,2,4281.495192  
8,2,2090.057692  
8,2,4924.444444  
8,2,1650.290625  
8,2,4211.013514  
8,2,22482.750000  
8,2,4905.219828  
8,2,4592.559524  
8,2,5787.987245  
8,2,2551.825000  
8,2,1505.485577

8,2,6299.000000  
8,2,1613.517442  
8,2,1710.666667  
8,2,1785.009259  
8,2,2322.483333  
8,2,1860.836478  
8,2,2385.130435  
8,2,1519.558442  
8,2,1819.799383  
8,2,3305.368715  
8,2,3662.668919  
8,2,1566.461538  
8,2,2254.185714  
8,2,2354.028409  
8,2,20110.962264  
8,2,17761.775000  
8,2,1669.293750  
8,2,10880.557927  
8,2,60817.529412  
8,2,2286.046875  
8,2,2726.634615  
8,2,2746.313636  
8,2,3866.595745  
8,2,11707.354651  
8,2,3438.452128  
8,2,2026.500000  
8,2,8447.855263  
8,2,2384.984043  
8,2,1834.625000  
8,2,3314.650862  
8,2,3135.070312  
8,2,4685.437500  
8,2,2056.718750  
8,2,2957.765625  
8,2,3903.635135  
8,2,10086.397727  
8,2,3334.652174  
8,2,4958.334091  
8,2,2638.884146  
8,2,1943.336538  
8,2,2617.834239  
8,2,10311.734146  
8,2,3689.945946  
8,2,3964.510638  
8,2,2479.806452  
8,2,3524.200000  
8,2,2265.849057  
8,2,1700.046875  
8,2,2598.375000  
8,2,5267.592391  
8,2,2256.142857  
8,2,1826.119565  
8,2,2211.872340  
8,2,3279.285714  
8,2,10201.475000  
8,2,3609.000000  
8,2,7964.451271  
8,2,1900.625000  
8,2,7516.625000  
8,2,2387.111702  
8,2,2542.250000  
8,2,3529.297872  
8,2,2383.733696  
8,2,3954.750000  
8,2,2098.015625  
8,2,4478.586207

8,2,1553.650000  
8,2,3203.021552  
8,2,11890.978571  
8,2,3493.812500  
8,2,12593.867187  
8,2,2603.056818  
8,2,2056.029762  
8,2,8567.552632  
8,2,1806.075000  
8,2,3394.337209  
8,2,1795.178571  
8,2,9968.375000  
8,2,3210.656250  
8,2,6914.326087  
8,2,9805.254545  
8,2,2872.562500  
8,2,3033.402439  
8,2,1902.341463  
8,2,5294.200000  
8,2,11617.207547  
8,2,4605.072115  
8,2,2412.416667  
8,2,2379.885638  
8,2,1876.484043  
8,2,3017.106481  
8,2,3885.445652  
8,2,2691.509375  
8,2,3160.930851  
8,2,5787.902098  
8,2,2486.781250  
8,2,1630.184091  
8,2,1576.017442  
8,2,1912.592105  
8,2,3471.416667  
8,2,4207.340909  
8,2,2329.341346  
8,2,2398.214286  
8,2,2985.505882  
8,2,3709.800000  
8,2,2631.186047  
8,2,5001.000000  
8,2,2922.149289  
8,2,3701.522222  
8,2,1701.537234  
8,2,4204.887821  
8,2,7218.960526  
8,2,2291.532051  
8,2,1697.680000  
8,2,2734.766304  
8,2,1743.968553  
8,2,1836.062500  
8,2,2969.000000  
8,2,2755.639175  
8,2,2923.201613  
8,2,5770.201087  
8,2,6420.765000  
8,2,6070.922872  
8,2,3941.250000  
8,2,2666.206522  
8,2,2238.791667  
8,2,4454.897727  
8,2,3909.185185  
8,2,15298.894737  
8,2,2632.946602  
8,2,1812.342105  
8,2,1527.892473

8,2,1514.375000  
8,2,3160.916667  
8,2,4337.139151  
8,2,2981.142857  
8,2,1638.542763  
8,2,1788.073529  
8,2,5371.215686  
8,2,2781.750000  
8,2,1848.420455  
8,2,1892.736111  
8,2,2487.465116  
8,2,9204.875000  
8,2,2508.941176  
8,2,1521.527174  
8,2,4346.447917  
8,2,3930.798295  
8,2,1736.266447  
8,2,4396.367021  
8,2,1617.446809  
8,2,2254.896277  
8,2,2106.250000  
8,2,4311.541667  
8,2,2738.400000  
8,2,1910.416667  
8,2,4003.871429  
8,2,8239.495192  
8,2,2637.050000  
8,2,7220.532609  
8,2,6390.713542  
8,2,2415.400000  
8,2,1953.180000  
8,2,2132.305000  
8,2,5142.756579  
8,2,2144.937500  
8,2,3484.448864  
8,2,3488.294118  
8,2,11661.500000  
8,2,4160.147436  
8,2,2824.470000  
8,2,9561.718085  
8,2,1804.666667  
8,2,5902.863636  
8,2,7825.175000  
8,2,40634.500000  
8,2,2173.011628  
8,2,6555.414894  
8,2,9045.864865  
8,2,2009.795213  
8,2,2291.166667  
8,2,7072.916667  
8,2,1855.158537  
8,2,2668.875000  
8,2,9919.733696  
8,2,2043.353659  
8,2,2098.621711  
8,2,13266.425000  
8,2,2896.931034  
8,2,2836.392157  
8,2,3673.338542  
8,2,3532.741935  
8,2,5398.843137  
8,2,5505.752778  
8,2,55579.670213  
8,2,3203.769444  
8,2,4751.182266  
8,2,2643.984375

8,2,6917.605000  
8,2,2512.995614  
8,2,4960.318750  
8,2,3193.454082  
8,2,1927.200431  
8,2,2957.632653  
8,2,9748.456522  
8,2,4680.543919  
8,2,5974.312500  
8,2,9677.777500  
8,2,4888.191327  
8,2,3025.231481  
8,2,2025.100000  
8,2,5456.729167  
8,2,13264.500000  
8,2,2654.978723  
8,2,2721.970588  
8,2,1985.465116  
8,2,4995.115385  
8,2,2167.897727  
8,2,1918.284091  
8,2,2118.572368  
8,2,4548.062500  
8,2,2425.588235  
8,2,1970.823171  
8,2,1879.640625  
8,2,3907.590116  
8,2,2062.152778  
8,2,2665.389423  
8,2,3547.941860  
8,2,8159.361635  
8,2,1661.125000  
8,2,1864.334459  
8,2,7923.750000  
8,2,4709.483516  
8,2,1924.625000  
8,2,4346.040816  
8,2,6517.125000  
8,2,13437.933333  
8,2,2375.143293  
8,2,3306.357500  
8,2,1878.945312  
8,2,2788.531250  
8,2,3775.562500  
8,2,8795.570312  
8,2,5943.981132  
8,2,2003.966667  
8,2,1795.375000  
8,2,15228.893939  
8,2,1521.540541  
8,2,4469.297872  
8,2,2516.333333  
8,2,1529.564024  
8,2,5333.436321  
8,2,7682.622222  
8,2,5623.653061  
8,2,2339.177083  
8,2,4604.588415  
8,2,4894.076923  
8,2,6584.192308  
8,2,10658.770349  
8,2,4306.457386  
8,2,2329.125000  
8,2,2421.307692  
8,2,2772.500000  
8,2,1575.242647

8,2,1661.531250  
8,2,4919.055556  
8,2,8048.812500  
8,2,3273.538462  
8,2,4443.560000  
8,2,2863.936275  
8,2,1781.450000  
8,2,7443.792135  
8,2,6176.372449  
8,2,2760.524038  
8,2,2746.086957  
8,2,1647.441860  
8,2,73943.698980  
8,2,3555.000000  
8,2,39834.279070  
8,2,3225.625000  
8,2,2542.744048  
8,2,1825.187500  
8,2,5232.115741  
8,2,2298.733333  
8,2,4420.795455  
8,2,2859.750000  
8,2,4379.619681  
8,2,2778.718750  
8,2,6690.464286  
8,2,2902.520270  
8,2,2965.152174  
8,2,3839.287162  
8,2,3471.906250  
8,2,7163.463235  
8,2,4126.025510  
8,2,3789.236364  
8,2,1766.851064  
8,2,4525.252193  
8,2,7077.940789  
8,2,8031.267045  
8,2,1640.718750  
8,2,1719.901961  
8,2,3767.237500  
8,2,1929.812500  
8,2,1535.290541  
8,2,5633.818182  
8,2,2113.041667  
8,2,2870.061224  
8,2,8082.539474  
8,2,7367.250000  
8,2,5593.331633  
8,2,2538.574468  
8,2,5778.673913  
8,2,1684.443590  
8,2,6786.540284  
8,2,5598.744681  
8,2,9438.115385  
8,2,2869.360577  
8,2,1631.300000  
8,2,2494.762376  
8,2,3559.145455  
8,2,1774.238095  
8,2,1850.227273  
8,2,3800.046875  
8,2,24842.460366  
8,2,2123.812500  
8,2,3088.535714  
8,2,3925.116071  
8,2,9311.293839  
8,2,6149.272727

8,2,2245.480769  
8,2,22275.707317  
8,2,12122.080000  
8,2,9548.243902  
8,2,7975.075000  
8,2,10964.580645  
8,2,1570.482955  
8,2,2003.005319  
8,2,3521.654762  
8,2,7503.047414  
8,2,2346.901042  
8,2,2277.578947  
8,2,5675.916667  
8,2,1770.604651  
8,2,23824.668103  
8,2,9313.313889  
8,2,5475.345745  
8,2,3782.571429  
8,2,3293.143750  
8,2,13106.778061  
8,2,3524.028846  
8,2,5410.018182  
8,2,2603.213235  
8,2,4718.021739  
8,2,2566.398256  
8,2,4527.183511  
8,2,8155.680000  
8,2,1767.812500  
8,2,2263.785714  
8,2,6596.627907  
8,2,1639.951220  
8,2,10307.034188  
8,2,2815.791209  
8,2,6049.285714  
8,2,5727.160526  
8,2,6314.574713  
8,2,1747.647059  
8,2,9160.411765  
8,2,1811.090909  
8,2,3868.010204  
8,2,1842.383721  
8,2,4490.138889  
8,2,3850.413043  
8,2,2428.125000  
8,2,1787.268293  
8,2,3015.197802  
8,2,2008.206667  
8,2,3522.007389  
8,2,3729.897727  
8,2,7410.250000  
8,2,2596.908482  
8,2,4618.343750  
8,2,1578.244444  
8,2,6877.934524  
8,2,2074.687500  
8,2,2343.555556  
8,2,2807.562500  
8,2,1801.375000  
8,2,4217.937500  
8,2,2557.316176  
8,2,2936.541667  
8,2,6400.598485  
8,2,3369.428571  
8,2,1902.421875  
8,2,4425.988372  
8,2,6816.345588

8,2,14088.655405  
8,2,1719.602041  
8,2,5801.334821  
8,2,2360.326923  
8,2,5958.587500  
8,2,3185.887755  
8,2,1695.395833  
8,2,2136.484375  
8,2,3752.750000  
8,2,8628.103261  
8,2,2102.882653  
8,2,4705.127072  
8,2,1551.583333  
8,2,4544.114754  
8,2,4554.000000  
8,2,4994.194444  
8,2,2263.506757  
8,2,2144.190000  
8,2,4239.692568  
8,2,2413.592213  
8,2,5363.402439  
8,2,2286.480000  
8,2,2064.840426  
8,2,4245.500000  
8,2,1644.182692  
8,2,2702.483871  
8,2,7774.941489  
8,2,1683.941489  
8,2,3214.614583  
8,2,7332.153846  
8,2,6096.676471  
8,2,16140.250000  
8,2,2459.187500  
8,2,4104.655556  
8,2,11998.524457  
8,2,32148.659091  
8,2,5975.593023  
8,2,5230.868421  
8,2,14769.921875  
8,2,2509.250000  
8,2,4218.824074  
8,2,2158.847682  
8,2,2189.048780  
8,2,2189.044444  
8,2,1565.936170  
8,2,5851.562500  
8,2,5428.142857  
8,2,2883.583333  
8,2,26625.046512  
8,2,2539.875000  
8,2,1965.137500  
8,2,9084.048295  
8,2,3372.262500  
8,2,1848.338235  
8,2,2110.450000  
8,2,3554.327778  
8,2,2502.740909  
8,2,4182.948980  
8,2,2526.993750  
8,2,2922.914773  
8,2,2338.330556  
8,2,3508.469298  
8,2,1682.242857  
8,2,3260.172297  
8,2,4323.964706  
8,2,2045.226667

8,2,3198.347826  
8,2,1529.833333  
8,2,2371.228261  
8,2,2283.750000  
8,2,12057.720745  
8,2,11171.375000  
8,2,13469.766990  
8,2,4077.358491  
8,2,2863.816176  
8,2,7331.451531  
8,2,14454.179245  
8,2,1549.830357  
8,2,1983.600000  
8,2,1553.569767  
8,2,2015.761628  
8,2,2824.293750  
8,2,4433.661932  
8,2,2745.463415  
8,2,27283.138889  
8,2,2798.877717  
8,2,5217.197674  
8,2,1895.000000  
8,2,2582.125000  
8,2,2113.200581  
8,2,2574.947674  
8,2,1999.724359  
8,2,1762.269430  
8,2,1749.743902  
8,2,2313.625000  
8,2,7064.627193  
8,2,1878.750000  
8,2,1901.804054  
8,2,5126.990741  
8,2,17384.412791  
8,2,3510.668571  
8,2,1717.398256  
8,2,4897.199519  
8,2,3009.139881  
8,2,2471.146341  
8,2,1756.405000  
8,2,3528.628571  
8,2,5841.617788  
8,2,1665.512195  
8,2,2319.165865  
8,2,3279.412791  
8,2,2587.950000  
8,2,4703.378049  
8,2,2819.088068  
8,2,2890.448980  
8,2,2306.032051  
8,2,2783.179688  
8,2,6253.750000  
8,2,5443.693627  
8,2,3036.220238  
8,2,7825.178977  
8,2,1847.875000  
8,2,2645.604651  
8,2,5411.333333  
8,2,12840.757576  
8,2,4794.000000  
8,2,2495.842105  
8,2,4531.425532  
8,2,5093.125000  
8,2,2750.343750  
8,2,1792.638889  
8,2,3427.732955

8,2,3698.142857  
8,2,6455.953125  
8,2,6546.219388  
8,2,1906.428571  
8,2,2085.201705  
8,2,1587.250000  
8,2,1991.259375  
8,2,2453.675532  
8,2,2471.492021  
8,2,2091.833333  
8,2,2119.005814  
8,2,1540.913265  
8,2,2498.000000  
8,2,10132.625000  
8,2,4509.573171  
8,2,2079.089744  
8,2,8874.115196  
8,2,1680.950581  
8,2,2085.266667  
8,2,3302.264535  
8,2,1803.333333  
8,2,1859.250000  
8,2,2838.250000  
8,2,3067.902985  
8,2,6483.233173  
8,2,3612.775000  
8,2,7810.216667  
8,2,3178.279070  
8,2,4789.309783  
8,2,4028.300000  
8,2,9722.951220  
8,2,1520.011628  
8,2,21515.600000  
8,2,2805.107527  
8,2,2781.810345  
8,2,6600.066832  
8,2,3851.183673  
8,2,7931.750000  
8,2,2566.302083  
8,2,1725.659091  
8,2,2697.755102  
8,2,1577.894886  
8,2,2744.091667  
8,2,3164.890625  
8,2,1754.518072  
8,2,1778.166667  
8,2,3093.595238  
8,2,5867.313679  
8,2,2944.818713  
8,2,1812.338462  
8,2,1525.353723  
8,2,2515.926829  
8,2,1599.761628  
8,2,5333.843023  
8,2,1739.270270  
8,2,1651.701087  
8,2,2277.350610  
8,2,1983.347826  
8,2,1648.931818  
8,2,6914.716981  
8,2,3217.250000  
8,2,1527.028846  
8,2,7387.527027  
8,2,8115.967213  
8,2,1620.000000  
8,2,2123.785714

8,2,2255.841667  
8,2,2544.447222  
8,2,2483.598404  
8,2,2182.201087  
8,2,3948.928571  
8,2,1625.341216  
8,2,1661.606132  
8,2,2467.293478  
8,2,1963.336310  
8,2,2375.904255  
8,2,3932.754717  
8,2,1721.580357  
8,2,1503.906250  
8,2,4542.043478  
8,2,2235.659091  
8,2,2872.906250  
8,2,2077.701923  
8,2,3360.872093  
8,2,2299.942708  
8,2,4654.510204  
8,2,7791.285714  
8,2,1677.595745  
8,2,3925.400000  
8,2,2141.538462  
8,2,6725.244681  
8,2,1540.665698  
8,2,2105.810897  
8,2,4793.130435  
8,2,2815.000000  
8,2,6263.933333  
8,2,3291.548387  
8,2,2556.048913  
8,2,1707.761364  
8,2,12148.593750  
8,2,9128.269068  
8,2,29290.358696  
8,2,3531.107143  
8,2,3071.466837  
8,2,3573.843750  
8,2,15274.683962  
8,2,5746.796569  
8,2,9160.693182  
8,2,3168.806818  
8,2,3609.597561  
8,2,5323.762295  
8,2,1530.945122  
8,2,2386.406250  
8,2,6825.397727  
8,2,2623.815789  
8,2,3357.099359  
8,2,4911.002841  
8,2,4203.877551  
8,2,7175.750000  
8,2,4039.238095  
8,2,2205.806818  
8,2,8110.857143  
8,2,5107.760638  
8,2,8557.184783  
8,2,1645.552632  
8,2,1843.062500  
8,2,5317.033333  
8,2,8999.744186  
8,2,3559.631579  
8,2,4718.282609  
8,2,5293.230769  
8,2,9550.703125

8,2,3869.274457  
8,2,4840.423228  
8,2,1805.000000  
8,2,3296.521739  
8,2,14922.846154  
8,2,10264.858407  
8,2,6985.609375  
8,2,1886.560976  
8,2,2427.869048  
8,2,3311.596875  
8,2,10132.000000  
8,2,2031.750000  
8,2,9308.505525  
8,2,2026.095238  
8,2,5050.219512  
8,2,2190.076087  
8,2,1578.069079  
8,2,3169.666667  
8,2,1791.406915  
8,2,2905.392857  
8,2,5208.535000  
8,2,1738.515152  
8,2,5282.173913  
8,2,2175.395349  
8,2,3769.244681  
8,2,6326.139706  
8,2,6369.355392  
8,2,2295.692308  
8,2,1722.171053  
8,2,2623.223881  
8,2,2537.525862  
8,2,2390.334459  
8,2,1633.171196  
8,2,2737.939655  
8,2,1935.138889  
8,2,1805.287234  
8,2,1783.098837  
8,2,1978.627604  
8,2,5086.223684  
8,2,7749.816176  
8,2,5945.528302  
8,2,2829.951220  
8,2,2288.586957  
8,2,3312.068750  
8,2,4145.476744  
8,2,3578.145349  
8,2,5749.913265  
8,2,2480.266667  
8,2,8035.189732  
8,2,5497.200000  
8,2,3046.834459  
8,2,2640.495098  
8,2,1972.454787  
8,2,2464.554054  
8,2,2091.658537  
8,2,4149.973684  
8,2,2038.480556  
8,2,1724.332237  
8,2,4001.403125  
8,2,9691.548077  
8,2,2230.541667  
8,2,6741.064286  
8,2,2140.521739  
8,2,2307.363636  
8,2,4349.079327  
8,2,2104.615000

8,2,2182.776786  
8,2,4313.691489  
8,2,2742.601064  
8,2,5387.540816  
8,2,4554.000000  
8,2,3433.813253  
8,2,5145.567633  
8,2,2417.839623  
8,2,2376.685000  
8,2,1641.087209  
8,2,2838.679054  
8,2,2221.554688  
8,2,4523.651786  
8,2,5223.632653  
8,2,1914.916667  
8,2,4486.333333  
8,2,3068.609375  
8,2,2181.958333  
8,2,7009.867788  
8,2,4339.271739  
8,2,1576.500000  
8,2,1630.412500  
8,2,1796.145833  
8,2,3592.468023  
8,2,2283.166667  
8,2,6518.093220  
8,2,2177.940789  
8,2,2920.529255  
8,2,2516.230556  
8,2,6492.747807  
8,2,4111.759615  
8,2,7109.041667  
8,2,2512.140306  
8,2,2723.920455  
8,2,7737.020000  
8,2,3600.068182  
8,2,2671.148438  
8,2,4178.348485  
8,2,2412.363636  
8,2,3794.651163  
8,2,2975.671053  
8,2,3706.505435  
8,2,2809.520000  
8,2,2004.795455  
8,2,3232.260870  
8,2,7688.718750  
8,2,2185.625000  
8,2,1617.692308  
8,2,1905.792683  
8,2,5598.968023  
8,2,11891.945312  
8,2,4368.125000  
8,2,6370.475610  
8,2,11658.693182  
8,2,23639.653846  
8,2,12494.470199  
8,2,1977.750000  
8,2,4549.531250  
8,2,1716.485714  
8,2,1563.265625  
8,2,4062.010695  
8,2,3690.068627  
8,2,2949.225490  
8,2,1945.487500  
8,2,1525.428571  
8,2,6572.715426

8,2,4114.562500  
8,2,3500.468750  
8,2,2978.414634  
8,2,3066.384615  
8,2,2347.459459  
8,2,2160.375000  
8,2,1680.136905  
8,2,1701.500000  
8,2,2288.142857  
8,2,6135.174419  
8,2,5386.524390  
8,2,2788.666667  
8,2,1787.293478  
8,2,10200.834375  
8,2,1959.416667  
8,2,6746.674419  
8,2,14469.696429  
8,2,2797.671875  
8,2,3430.909884  
8,2,2653.181548  
8,2,3038.739583  
8,2,1773.494444  
8,2,2619.406452  
8,2,3040.799107  
8,2,7668.246795  
8,2,23250.964844  
8,2,3714.550000  
8,2,2658.339286  
8,2,2109.179348  
8,2,2745.863636  
8,2,3215.052632  
8,2,5247.769231  
8,2,2181.083832  
8,2,1648.938424  
8,2,3395.850000  
8,2,4776.137255  
8,2,3004.022727  
8,2,2479.610577  
8,2,5871.423529  
8,2,2309.750000  
8,2,1550.740566  
8,2,12700.187500  
8,2,1677.280488  
8,2,5847.279070  
8,2,2431.229167  
8,2,3633.317073  
8,2,1978.320652  
8,2,3066.532609  
8,2,1980.598837  
8,2,1657.204861  
8,2,4257.271429  
8,2,9401.704955  
8,2,1617.160448  
8,2,3913.268072  
8,2,3254.476064  
8,2,4759.305000  
8,2,4107.166667  
8,2,6178.096154  
8,2,2323.640000  
8,2,2602.957317  
8,2,4028.551136  
8,2,34848.537879  
8,2,4836.813953  
8,2,2617.143750  
8,2,3364.937500  
8,2,3674.630814

8,2,2218.989796  
8,2,2714.744565  
8,2,2155.520000  
8,2,4073.859155  
8,2,9932.666667  
8,2,7543.045455  
8,2,2918.395833  
8,2,2860.725000  
8,2,6274.721649  
8,2,2434.761290  
8,2,2661.155405  
8,2,4565.510000  
8,2,3680.344444  
8,2,6279.064904  
8,2,6031.898438  
8,2,4540.616279  
8,2,1957.411765  
8,2,16474.814480  
8,2,6352.852941  
8,2,7245.774510  
8,2,1538.702830  
8,2,4959.724537  
8,2,1806.184492  
8,2,2433.841912  
8,2,4554.523936  
8,2,4054.469388  
8,2,3012.692935  
8,2,5363.931319  
8,2,6333.142857  
8,2,2454.864130  
8,2,6008.714286  
8,2,10949.500000  
8,2,3845.087500  
8,2,10570.470588  
8,2,1888.197917  
8,2,7204.196721  
8,2,1768.985294  
8,2,1880.402778  
8,2,2602.008523  
8,2,4350.725490  
8,2,3361.310345  
8,2,2896.347682  
8,2,1709.295455  
8,2,5760.851744  
8,2,1618.308824  
8,2,3407.274194  
8,2,2102.396277  
8,2,9460.662088  
8,2,3519.840909  
8,2,4555.313776  
8,2,2231.192857  
8,2,4029.571429  
8,2,4674.680365  
8,2,6079.200000  
8,2,10583.704545  
8,2,1521.264423  
8,2,6733.905660  
8,2,3671.365132  
8,2,7779.103723  
8,2,2917.087838  
8,2,25194.422727  
8,2,1582.875000  
8,2,6666.894231  
8,2,2370.651163  
8,2,2118.095745  
8,2,5682.086957

8,2,2334.500000  
8,2,1842.494565  
8,2,3773.921196  
8,2,15285.730088  
8,2,2999.538462  
8,2,5842.166667  
8,2,2067.717822  
8,2,3446.806604  
8,2,15588.289634  
8,2,3037.741848  
8,2,1973.937500  
8,2,1673.396875  
8,2,9804.384375  
8,2,5342.352941  
8,2,2040.107143  
8,2,2139.628205  
8,2,7149.494048  
8,2,2429.410256  
8,2,13569.105263  
8,2,2700.892857  
8,2,2039.646739  
8,2,2580.570652  
8,2,2067.898810  
8,2,4614.000000  
8,2,7400.723214  
8,2,6812.387019  
8,2,5887.779070  
8,2,6051.459906  
8,2,1530.678571  
8,2,1549.922794  
8,2,3719.666667  
8,2,3893.159763  
8,2,2089.002146  
8,2,5619.448529  
8,2,2232.386905  
8,2,1885.084906  
8,2,2423.113426  
8,2,1703.512195  
8,2,4324.081250  
8,2,9337.344697  
8,2,1511.686170  
8,2,3852.375000  
8,2,2724.208333  
8,2,1968.317073  
8,2,1872.941176  
8,2,4103.701923  
8,2,1641.434783  
8,2,4441.280556  
8,2,3639.807692  
8,2,7253.754717  
8,2,1840.460227  
8,2,5118.673611  
8,2,10685.472500  
8,2,7678.957447  
8,2,3728.160000  
8,2,2602.158371  
8,2,1514.480769  
8,2,2769.765957  
8,2,2444.410714  
8,2,3021.771429  
8,2,8236.452586  
8,2,1905.414634  
8,2,1570.485714  
8,2,2683.600000  
8,2,2221.883929  
8,2,1968.446875

8,2,3904.790816  
8,2,1689.007979  
8,2,2351.704545  
8,2,2158.212500  
8,2,5516.009868  
8,2,1532.950000  
8,2,2161.868590  
8,2,3277.250000  
8,2,4433.774457  
8,2,2686.100000  
8,2,1621.182927  
8,2,1564.208333  
8,2,3283.000000  
8,2,3009.500000  
8,2,5658.409091  
8,2,13736.485294  
8,2,2375.918367  
8,2,1593.757143  
8,2,5791.872449  
8,2,2492.848485  
8,2,3286.947917  
8,2,2946.693750  
8,2,2438.450000  
8,2,2009.856618  
8,2,2648.225000  
8,2,2641.385135  
8,2,4047.971591  
8,2,5387.523936  
8,2,1693.500000  
8,2,2669.381098  
8,2,3133.810000  
8,2,9215.725806  
8,2,3117.207447  
8,2,2202.808824  
8,2,2418.401914  
8,2,4526.831633  
8,2,2512.176136  
8,2,1788.321429  
8,2,3134.968750  
8,2,8507.724432  
8,2,3392.480769  
8,2,2881.716981  
8,2,3532.870787  
8,2,2344.544737  
8,2,1503.014368  
8,2,6697.101351  
8,2,3404.612903  
8,2,1734.230769  
8,2,3070.972222  
8,2,3751.051402  
8,2,1575.834375  
8,2,1827.420000  
8,2,2102.015000  
8,2,6054.652174  
8,2,2483.611842  
8,2,3312.108974  
8,2,1864.347826  
8,2,2425.056872  
8,2,2116.137755  
8,2,2458.253521  
8,2,4938.970588  
8,2,11250.949074  
8,2,1881.260638  
8,2,4399.150735  
8,2,1760.727273  
8,2,2150.368902

8,2,6497.700000  
8,2,10856.117021  
8,2,2421.635000  
8,2,2024.581522  
8,2,2156.000000  
8,2,2152.714286  
8,2,2477.316038  
8,2,2767.089286  
8,2,4313.154762  
8,2,27479.432065  
8,2,7059.771277  
8,2,4191.625000  
8,2,7256.187500  
8,2,2022.542553  
8,2,7620.864130  
8,2,4253.099359  
8,2,1979.000000  
8,2,1843.340426  
8,2,6561.346698  
8,2,1743.505682  
8,2,3234.093750  
8,2,2600.789474  
8,2,2112.095092  
8,2,1888.761905  
8,2,6985.593023  
8,2,2878.406977  
8,2,2095.694767  
8,2,1630.271341  
8,2,2380.150685  
8,2,2521.325000  
8,2,2557.549242  
8,2,4093.591837  
8,2,3534.234043  
8,2,7325.250000  
8,2,2120.022727  
8,2,1647.246951  
8,2,1708.342105  
8,2,2069.170213  
8,2,7276.315217  
8,2,3454.788043  
8,2,1652.369565  
8,2,1561.087766  
8,2,2100.829268  
8,2,1869.539474  
8,2,9991.495000  
8,2,2060.647059  
8,2,3836.062500  
8,2,10442.886792  
8,2,2583.875000  
8,2,3847.255556  
8,2,2726.731250  
8,2,2339.844340  
8,2,5722.503125  
8,2,2186.437500  
8,2,3159.194079  
8,2,2067.750000  
8,2,1523.330645  
8,2,2074.972500  
8,2,1631.146341  
8,2,3461.526786  
8,2,4094.451220  
8,2,31819.410714  
8,2,1625.801471  
8,2,4837.250000  
8,2,7865.222543  
8,2,4720.310606

8,2,4581.642105  
8,2,2987.759259  
8,2,1922.568452  
8,2,2125.711207  
8,2,9287.472826  
8,2,27562.304878  
8,2,7343.425926  
8,2,1724.960000  
8,2,1734.842105  
8,2,2049.292969  
8,2,1731.504808  
8,2,2097.259434  
8,2,1941.839286  
8,2,2389.216216  
8,2,2161.011628  
8,2,4647.636364  
8,2,3042.118056  
8,2,4477.250000  
8,2,2734.736486  
8,2,2106.235000  
8,2,6295.097222  
8,2,6607.709497  
8,2,5836.769531  
8,2,8064.558140  
8,2,1683.416667  
8,2,5364.476923  
8,2,2191.621622  
8,2,3486.692308  
8,2,6042.932692  
8,2,4948.888889  
8,2,1867.984375  
8,2,2707.875000  
8,2,2059.291667  
8,2,3563.595395  
8,2,3451.476415  
8,2,3410.782895  
8,2,2984.956522  
8,2,2474.250000  
8,2,9839.694149  
8,2,5687.373171  
8,2,1979.286486  
8,2,2240.475524  
8,2,4019.416667  
8,2,2427.669643  
8,2,4018.193717  
8,2,7298.318681  
8,2,8162.546358  
8,2,2953.492925  
8,2,1912.312500  
8,2,3107.938725  
8,2,2304.361702  
8,2,2246.455882  
8,2,8042.051282  
8,2,3455.065574  
8,2,3339.528302  
8,2,1994.148148  
8,2,3785.497423  
8,2,5452.502551  
8,2,4779.833333  
8,2,6496.860465  
8,2,6187.097222  
8,2,2711.958333  
8,2,1555.197917  
8,2,1570.112500  
8,2,1919.290909  
8,2,4687.700000

8,2,2273.317308  
8,2,1902.608696  
8,2,15147.402439  
8,2,9770.000000  
8,2,2128.915865  
8,2,7359.625000  
8,2,2291.023256  
8,2,3383.545918  
8,2,1666.164474  
8,2,1985.564024  
8,2,1599.402174  
8,2,2401.537791  
8,2,2293.428125  
8,2,2387.005435  
8,2,1823.427632  
8,2,3423.849138  
8,2,2176.333333  
8,2,2769.189189  
8,2,2956.478723  
8,2,5008.177778  
8,2,2010.459135  
8,2,2623.478723  
8,2,3998.723558  
8,2,1585.736842  
8,2,2407.323171  
8,2,3709.679878  
8,2,2392.797619  
8,2,2519.243902  
8,2,2866.617021  
8,2,7472.925000  
8,2,7049.542553  
8,2,2510.551887  
8,2,1746.604730  
8,2,1598.625000  
8,2,2769.902778  
8,2,3616.312500  
8,2,3040.937500  
8,2,5171.611111  
8,2,1637.685714  
8,2,1837.088068  
8,2,2320.829268  
8,2,3523.875000  
8,2,16700.801020  
8,2,4247.970000  
8,2,3905.563953  
8,2,5762.321429  
8,2,1572.156250  
8,2,5051.000000  
8,2,2498.658784  
8,2,2731.369318  
8,2,12662.703488  
8,2,2590.900000  
8,2,8563.154676  
8,2,2420.268229  
8,2,3304.000000  
8,2,1867.000000  
8,2,4587.450000  
8,2,12836.744681  
8,2,1777.276596  
8,2,6722.650000  
8,2,4002.830645  
8,2,3279.279070  
8,2,3288.392045  
8,2,5970.733333  
8,2,2092.031250  
8,2,2135.918605

8,2,1687.695122  
8,2,3554.850610  
8,2,3004.920213  
8,2,2051.057692  
8,2,6216.416667  
8,2,7481.078261  
8,2,4709.627660  
8,2,2933.055556  
8,2,2062.579268  
8,2,3060.234694  
8,2,4689.406250  
8,2,2974.900000  
8,2,2082.682927  
8,2,2275.716667  
8,2,2212.654545  
8,2,4270.223214  
8,2,1786.282051  
8,2,1695.786111  
8,2,3739.101770  
8,2,3087.691489  
8,2,2470.026786  
8,2,6371.281250  
8,2,3223.531250  
8,2,1734.534884  
8,2,4853.572368  
8,2,2798.383152  
8,2,1826.076220  
8,2,2579.607143  
8,2,1826.801242  
8,2,2670.000000  
8,2,2167.361842  
8,2,4661.897436  
8,2,1560.250000  
8,2,17164.920000  
8,2,4793.000000  
8,2,9703.887755  
8,2,5269.909091  
8,2,1668.803571  
8,2,2477.540541  
8,2,5418.540541  
8,2,6335.244681  
8,2,1659.585938  
8,2,1859.740000  
8,2,1878.628571  
8,2,2820.989130  
8,2,3191.529801  
8,2,2076.757500  
8,2,6391.489130  
8,2,1614.636364  
8,2,2218.505952  
8,2,2103.800000  
8,2,1921.583333  
8,2,5298.801587  
8,2,1823.390244  
8,2,3442.380952  
8,2,1607.305921  
8,2,7231.450000  
8,2,1645.247191  
8,2,6861.990385  
8,2,3199.187500  
8,2,2296.631250  
8,2,1576.576923  
8,2,3154.900000  
8,2,5274.500000  
8,2,6916.202128  
8,2,1903.972973

8,2,4556.072115  
8,2,3596.166667  
8,2,1735.997159  
8,2,2687.976190  
8,2,2950.245283  
8,2,3197.964286  
8,2,3567.782051  
8,2,5693.832386  
8,2,1604.576923  
8,2,2121.017766  
8,2,4655.833333  
8,2,1600.939024  
8,2,4409.047500  
8,2,1630.734375  
8,2,3361.103774  
8,2,22802.162162  
8,2,2641.991848  
8,2,1669.733333  
8,2,1950.435000  
8,2,3014.514286  
8,2,2340.777778  
8,2,2337.513298  
8,2,1680.532609  
8,2,1894.255814  
8,2,25488.130208  
8,2,2183.304348  
8,2,1674.838068  
8,2,2105.000000  
8,2,2242.333333  
8,2,1911.189189  
8,2,1727.468750  
8,2,2945.447500  
8,2,6217.484375  
8,2,2136.444444  
8,2,2120.000000  
8,2,2081.587500  
8,2,4224.474057  
8,2,3645.160000  
8,2,2248.861111  
8,2,5633.944444  
8,2,1610.715000  
8,2,1990.674419  
8,2,5856.021277  
8,2,6355.712575  
8,2,3715.546512  
8,2,4337.080189  
8,2,2173.952128  
8,2,6753.070000  
8,2,2753.288462  
8,2,2577.440000  
8,2,2999.613636  
8,2,2829.127660  
8,2,1895.387195  
8,2,4369.602679  
8,2,2623.941860  
8,2,6748.879630  
8,2,8327.000000  
8,2,4445.857143  
8,2,4022.244253  
8,2,1735.459459  
8,2,1573.176471  
8,2,2947.848684  
8,2,2124.361702  
8,2,1933.587500  
8,2,1956.170732  
8,2,2478.166667

8,2,1939.050000  
8,2,3539.750000  
8,2,4091.833333  
8,2,2256.942308  
8,2,4809.089286  
8,2,7287.515625  
8,2,2438.555556  
8,2,1792.231707  
8,2,2600.909091  
8,2,10607.073770  
8,2,3196.747596  
8,2,2214.136126  
8,2,4908.050898  
8,2,3444.171196  
8,2,8477.975000  
8,2,1763.019231  
8,2,5525.212500  
8,2,8904.287500  
8,2,2384.616279  
8,2,1645.576923  
8,2,6089.174419  
8,2,2249.882353  
8,2,6814.687500  
8,2,3146.682292  
8,2,4136.875000  
8,2,1865.873418  
8,2,4787.506329  
8,2,6233.760638  
8,2,2046.668269  
8,2,2238.642361  
8,2,1649.087413  
8,2,1767.200581  
8,2,2891.658537  
8,2,1919.272455  
8,2,21190.530220  
8,2,4428.469274  
8,2,2711.531250  
8,2,4212.222222  
8,2,5090.952381  
8,2,2305.703125  
8,2,1685.592593  
8,2,2396.243902  
8,2,4592.937500  
8,2,15558.442308  
8,2,1763.729299  
8,2,1785.693299  
8,2,2656.500000  
8,2,3307.081731  
8,2,1812.357143  
8,2,12306.843750  
8,2,2087.173913  
8,2,1770.310811  
8,2,1713.848214  
8,2,4771.071429  
8,2,2804.421875  
8,2,4211.197674  
8,2,2166.565789  
8,2,2369.267241  
8,2,2998.468750  
8,2,3231.380952  
8,2,1727.769444  
8,2,1661.357558  
8,2,4809.560000  
8,2,2072.808511  
8,2,3532.561404  
8,2,4244.916667

8,2,7803.827128  
8,2,1872.573171  
8,2,1522.945312  
8,2,3521.791667  
8,2,2364.506757  
8,2,5364.566327  
8,2,2512.035714  
8,2,9357.594444  
8,2,1583.795918  
8,2,5599.207729  
8,2,1907.097727  
8,2,2450.375000  
8,2,10977.957447  
8,2,1584.152439  
8,2,3136.894737  
8,2,3397.092262  
8,2,1690.835526  
8,2,3506.096154  
8,2,12468.306818  
8,2,4468.493421  
8,2,4053.337209  
8,2,18783.455882  
8,2,6143.203125  
8,2,13031.346939  
8,2,4443.075581  
8,2,1882.000000  
8,2,2550.015000  
8,2,1696.555921  
8,2,4246.384615  
8,2,1955.904255  
8,2,3127.246231  
8,2,4931.263889  
8,2,5626.321429  
8,2,2599.000000  
8,2,1952.500000  
8,2,4739.180851  
8,2,4336.466667  
8,2,2925.036111  
8,2,3625.558140  
8,2,1900.022500  
8,2,2003.092949  
8,2,2145.326220  
8,2,2000.212766  
8,2,2059.826087  
8,2,2610.928977  
8,2,2203.473837  
8,2,2830.093750  
8,2,1789.927632  
8,2,3370.556250  
8,2,2780.540816  
8,2,2527.350000  
8,2,1999.394737  
8,2,3845.100000  
8,2,1626.071856  
8,2,2314.320946  
8,2,3184.628676  
8,2,3997.454545  
8,2,1635.219512  
8,2,3528.900000  
8,2,2647.928571  
8,2,2011.069307  
8,2,4226.329268  
8,2,1671.345946  
8,2,6308.266839  
8,2,3539.060976  
8,2,8008.833333

8,2,1928.410256  
8,2,1536.670732  
8,2,1930.218750  
8,2,2487.962766  
8,2,2910.658088  
8,2,1719.777778  
8,2,5841.244681  
8,2,2297.200000  
8,2,3067.210526  
8,2,2924.021341  
8,2,2381.153646  
8,2,2188.710526  
8,2,2944.622093  
8,2,9047.225000  
8,2,2905.750000  
8,2,1752.687500  
8,2,1735.076087  
8,2,4250.950000  
8,2,4702.890086  
8,2,1544.321608  
8,2,11311.520408  
8,2,3237.860000  
8,2,4359.446927  
8,2,3223.318182  
8,2,1579.433673  
8,2,2056.743243  
8,2,2760.457143  
8,2,9576.627907  
8,2,3576.123153  
8,2,2339.915205  
8,2,2519.784091  
8,2,2027.451613  
8,2,2532.711957  
8,2,1985.770408  
8,2,2293.120000  
8,2,3052.434211  
8,2,2778.108974  
8,2,2616.281250  
8,2,2081.563830  
8,2,2607.420213  
8,2,4000.982500  
8,2,1774.250000  
8,2,2949.005814  
8,2,2493.843182  
8,2,3376.470588  
8,2,4693.586538  
8,2,4990.968182  
8,2,4236.611111  
8,2,3669.169811  
8,2,2233.883721  
8,2,2423.032895  
8,2,2951.783163  
8,2,2479.122283  
8,2,2812.306818  
8,2,5128.100000  
8,2,3521.000000  
8,2,3673.557292  
8,2,1927.109375  
8,2,3292.277027  
8,2,1965.123711  
8,2,8296.162500  
8,2,1724.788043  
8,2,3815.237113  
8,2,3093.216518  
8,2,2469.308140  
8,2,5703.342105

8,2,5601.716981  
8,2,2420.514706  
8,2,1760.522222  
8,2,2298.718182  
8,2,1572.425000  
8,2,2277.585366  
8,2,2892.424419  
8,2,4992.064189  
8,2,3013.445714  
8,2,4979.500000  
8,2,1627.476923  
8,2,2408.194767  
8,2,3079.985714  
8,2,1947.128205  
8,2,2553.540984  
8,2,2134.092949  
8,2,3185.063679  
8,2,7932.979167  
8,2,2799.436224  
8,2,4298.214286  
8,2,1770.425481  
8,2,3988.120690  
8,2,1726.800000  
8,2,1718.687500  
8,2,2580.690789  
8,2,1726.000000  
8,2,2401.202778  
8,2,4564.611111  
8,2,2070.400510  
8,2,2364.414634  
8,2,5839.390625  
8,2,2210.195652  
8,2,2572.315789  
8,2,2643.388889  
8,2,5048.310096  
8,2,3030.650424  
8,2,8862.005319  
8,2,1975.390244  
8,2,2191.000000  
8,2,3233.666667  
8,2,14550.418919  
8,2,2759.452703  
8,2,2656.115183  
8,2,1601.337838  
8,2,4479.812500  
8,2,1938.192308  
8,2,1943.215909  
8,2,2934.778125  
8,2,3638.693182  
8,2,13402.211207  
8,2,4238.867647  
8,2,2101.715116  
8,2,2461.796053  
8,2,2126.758621  
8,2,5431.466667  
8,2,8823.240385  
8,2,2288.625000  
8,2,4760.174479  
8,2,3227.785714  
8,2,2546.272727  
8,2,5247.454268  
8,2,1772.462500  
8,2,1881.118750  
8,2,1602.187500  
8,2,6326.828704  
8,2,1935.090909

8,2,2113.265957  
8,2,3169.202703  
8,2,4045.134615  
8,2,2375.740000  
8,2,4699.223404  
8,2,3462.588957  
8,2,1771.793194  
8,2,1812.488636  
8,2,2220.834302  
8,2,5727.443878  
8,2,2339.777143  
8,2,9196.489362  
8,2,1528.952830  
8,2,1658.362500  
8,2,2244.565625  
8,2,6509.368952  
8,2,6406.184375  
8,2,2780.421053  
8,2,3823.000000  
8,2,6415.328125  
8,2,2361.528846  
8,2,3372.160256  
8,2,1773.546053  
8,2,3342.225000  
8,2,2625.333333  
8,2,15265.342105  
8,2,1732.506173  
8,2,3544.600000  
8,2,3335.750000  
8,2,2325.691489  
8,2,1664.837838  
8,2,1523.479730  
8,2,1963.375000  
8,2,1848.453883  
8,2,5940.315476  
8,2,3777.625000  
8,2,3742.476190  
8,2,3560.105263  
8,2,2938.713889  
8,2,7943.096154  
8,2,7825.009615  
8,2,3012.701087  
8,2,4783.700617  
8,2,2388.162791  
8,2,4164.010870  
8,2,3694.107558  
8,2,1791.853659  
8,2,3952.384146  
8,2,2612.387195  
8,2,1874.979167  
8,2,4191.640244  
8,2,2300.287162  
8,2,1903.506098  
8,2,2863.385417  
8,2,2353.837963  
8,2,2110.347826  
8,2,2904.450000  
8,2,3189.593750  
8,2,4202.186813  
8,2,6963.759162  
8,2,11638.880682  
8,2,2074.418478  
8,2,31325.292683  
8,2,5634.101562  
8,2,4097.463235  
8,2,1828.402778

8,2,1728.659091  
8,2,9201.650000  
8,2,4716.000000  
8,2,2626.263736  
8,2,1636.300000  
8,2,1851.918269  
8,2,3280.208333  
8,2,3617.614130  
8,2,2114.173611  
8,2,1980.821053  
8,2,2672.842105  
8,2,3748.604167  
8,2,4740.536313  
8,2,4843.985294  
8,2,7115.448276  
8,2,3310.804348  
8,2,2518.451389  
8,2,2459.340625  
8,2,1628.255952  
8,2,1732.678571  
8,2,3706.916667  
8,2,1822.432432  
8,2,1692.473958  
8,2,2235.588889  
8,2,1881.327778  
8,2,2745.825658  
8,2,3283.000000  
8,2,3965.941327  
8,2,6495.760000  
8,2,2062.356061  
8,2,2163.237805  
8,2,4098.875000  
8,2,1520.448980  
8,2,1805.687500  
8,2,3463.514706  
8,2,2603.696875  
8,2,2622.170732  
8,2,4076.250000  
8,2,2914.031250  
8,2,1575.125000  
8,2,3062.502660  
8,2,5615.961538  
8,2,4348.138249  
8,2,4781.506250  
8,2,3527.012500  
8,2,2569.756410  
8,2,7165.180556  
8,2,4691.712209  
8,2,4331.062500  
8,2,1933.075893  
8,2,3062.493750  
8,2,3786.221154  
8,2,3382.168103  
8,2,2106.132812  
8,2,1906.443627  
8,2,4677.625000  
8,2,3319.030612  
8,2,2049.125000  
8,2,1726.522222  
8,2,2390.195946  
8,2,2901.925000  
8,2,6618.722222  
8,2,1992.600000  
8,2,1728.842767  
8,2,10069.111111  
8,2,4118.497674

8,2,4011.138298  
8,2,1536.454802  
8,2,7643.221622  
8,2,2672.727273  
8,2,2083.666667  
8,2,3942.742021  
8,2,1893.700000  
8,2,1667.708333  
8,2,1749.750000  
8,2,5086.906977  
8,2,1865.153846  
8,2,3059.315789  
8,2,3569.232143  
8,2,2349.067568  
8,2,1672.020833  
8,2,3821.172414  
8,2,2468.621622  
8,2,2052.401786  
8,2,1872.158537  
8,2,6295.944196  
8,2,1994.789062  
8,2,2287.380682  
8,2,2514.300847  
8,2,2346.987342  
8,2,4719.974359  
8,2,8193.510417  
8,2,5016.329167  
8,2,1720.675676  
8,2,4702.547619  
8,2,3469.840909  
8,2,1660.718750  
8,2,4783.697674  
8,2,5133.551020  
8,2,2732.510000  
8,2,4797.659375  
8,2,7595.118750  
8,2,8008.491379  
8,2,2675.002841  
8,2,2780.338983  
8,2,2209.972561  
8,2,5405.584135  
8,2,4782.531646  
8,2,3066.005682  
8,2,4152.107143  
8,2,2948.662234  
8,2,3202.651596  
8,2,1743.926020  
8,2,2545.743590  
8,2,5119.880319  
8,2,1745.045455  
8,2,1669.883333  
8,2,1746.947368  
8,2,5151.677130  
8,2,7334.418129  
8,2,2905.478723  
8,2,2411.340909  
8,2,3286.333333  
8,2,3804.380000  
8,2,6037.074074  
8,2,2434.641892  
8,2,2886.625000  
8,2,2951.258929  
8,2,3469.918605  
8,2,3952.328125  
8,2,1846.872159  
8,2,5228.303571

8,2,3772.265625  
8,2,2391.894737  
8,2,7621.919118  
8,2,6796.839286  
8,2,1870.750000  
8,2,5875.192708  
8,2,6443.720930  
8,2,2956.640000  
8,2,5380.618090  
8,2,1876.322581  
8,2,3451.460938  
8,2,15789.117925  
8,2,3996.579545  
8,2,1911.767857  
8,2,3166.448113  
8,2,8029.717391  
8,2,1922.218750  
8,2,5384.793103  
8,2,7398.385000  
8,2,5610.360577  
8,2,1556.571023  
8,2,9614.434524  
8,2,24818.428571  
8,2,1525.939024  
8,2,6608.716216  
8,2,4417.614286  
8,2,2312.555556  
8,2,20218.540625  
8,2,2874.109694  
8,2,9145.773585  
8,2,2975.458333  
8,2,3366.437500  
8,2,2171.843023  
8,2,4460.452381  
8,2,7368.693878  
8,2,3218.880814  
8,2,3410.728125  
8,2,2337.775785  
8,2,2532.786932  
8,2,3443.412791  
8,2,2121.397436  
8,2,3519.216216  
8,2,8963.600000  
8,2,2827.688830  
8,2,5130.131250  
8,2,2197.846354  
8,2,4810.760417  
8,2,3059.301136  
8,2,7699.416667  
8,2,2506.815104  
8,2,2123.055851  
8,2,2787.025641  
8,2,6543.439103  
8,2,6953.859375  
8,2,3219.928571  
8,2,2324.317708  
8,2,6437.932927  
8,2,3492.936170  
8,2,2736.489362  
8,2,1611.052083  
8,2,3447.892857  
8,2,2325.266667  
8,2,3930.615000  
8,2,1602.300000  
8,2,2746.149390  
8,2,3716.970588

8,2,4222.829787  
8,2,4150.352941  
8,2,10004.300000  
8,2,4389.925000  
8,2,3604.756410  
8,2,6961.675926  
8,2,1570.850000  
8,2,1511.544643  
8,2,1830.913043  
8,2,6691.919643  
8,2,10330.640625  
8,2,2752.789216  
8,2,3657.483240  
8,2,2056.703125  
8,2,30461.017442  
8,2,1579.864865  
8,2,1767.872283  
8,2,5653.675000  
8,2,4298.448529  
8,2,1587.562500  
8,2,1867.195755  
8,2,1546.160000  
8,2,4232.283784  
8,2,4515.514423  
8,2,9667.943182  
8,2,2101.914894  
8,2,2605.190341  
8,2,4741.294444  
8,2,8022.474537  
8,2,1623.527778  
8,2,4556.250000  
8,2,11847.966346  
8,2,3935.993056  
8,2,4412.745763  
8,2,1566.324324  
8,2,1798.602564  
8,2,3700.308511  
8,2,2014.136364  
8,2,3363.883333  
8,2,1673.757653  
8,2,1674.238095  
8,2,2620.014706  
8,2,2145.398438  
8,2,6420.524064  
8,2,3239.483146  
8,2,3776.982759  
8,2,5474.977273  
8,2,2343.770701  
8,2,6849.611399  
8,2,6586.765244  
8,2,1846.483173  
8,2,2501.666667  
8,2,12521.901786  
8,2,3742.875000  
8,2,5147.913889  
8,2,2651.745536  
8,2,1872.643382  
8,2,7980.111111  
8,2,2922.250000  
8,2,4152.191176  
8,2,1507.225962  
8,2,5594.275000  
8,2,2200.475490  
8,2,3176.000000  
8,2,4383.828125  
8,2,1780.196429

8,2,3054.907609  
8,2,4098.986486  
8,2,2166.848485  
8,2,1798.394886  
8,2,1683.161184  
8,2,3014.903409  
8,2,1613.736842  
8,2,4137.803571  
8,2,2086.454819  
8,2,5066.488095  
8,2,1584.913690  
8,2,2001.333333  
8,2,1740.371622  
8,2,2354.338889  
8,2,2316.325000  
8,2,1534.125000  
8,2,5839.483696  
8,2,3655.150568  
8,2,3894.500000  
8,2,3689.698020  
8,2,2753.911111  
8,2,1532.253378  
8,2,1706.375000  
8,2,3083.612500  
8,2,4210.202128  
8,2,2664.276382  
8,2,3881.545455  
8,2,18245.389121  
8,2,3087.177083  
8,2,1643.567073  
8,2,15958.765432  
8,2,3933.272727  
8,2,4681.585366  
8,2,3818.128788  
8,2,4319.250000  
8,2,2691.087766  
8,2,1584.875000  
8,2,4283.807500  
8,2,2155.177419  
8,2,2904.937500  
8,2,3757.383065  
8,2,4374.010417  
8,2,2966.571429  
8,2,4797.727778  
8,2,10501.188679  
8,2,3455.250000  
8,2,10357.796875  
8,2,2957.256250  
8,2,10337.125000  
8,2,9593.364754  
8,2,4716.111842  
8,2,2410.636364  
8,2,8901.084239  
8,2,2199.461957  
8,2,2354.384615  
8,2,3128.225000  
8,2,2902.000000  
8,2,10879.559091  
8,2,1736.634868  
8,2,8730.000000  
8,2,2135.653846  
8,2,2565.484375  
8,2,4742.815789  
8,2,1973.312500  
8,2,3922.586310  
8,2,1717.283422

8,2,3029.965969  
8,2,2741.448529  
8,2,2136.078488  
8,2,4738.015625  
8,2,3410.165761  
8,2,5853.521277  
8,2,4750.480769  
8,2,6375.704545  
8,2,8143.047619  
8,2,1808.837500  
8,2,12489.052885  
8,2,1769.009434  
8,2,9755.520408  
8,2,3639.952381  
8,2,3646.009615  
8,2,3551.241279  
8,2,5260.526639  
8,2,11944.351190  
8,2,4209.186047  
8,2,1897.025641  
8,2,6341.583333  
8,2,9141.187500  
8,2,2131.370861  
8,2,2190.258065  
8,2,2968.282051  
8,2,2309.463235  
8,2,4478.244565  
8,2,9002.596154  
8,2,2555.382812  
8,2,1652.464286  
8,2,2430.992188  
8,2,3963.485294  
8,2,3382.803571  
8,2,3992.292683  
8,2,2456.519231  
8,2,3101.573529  
8,2,3010.880952  
8,2,5968.714286  
8,2,1864.380952  
8,2,1686.680556  
8,2,4926.381818  
8,2,4027.712766  
8,2,13792.693966  
8,2,5884.050000  
8,2,4675.151596  
8,2,2990.142857  
8,2,2634.519737  
8,2,66060.125000  
8,2,2846.595745  
8,2,1999.000000  
8,2,2799.384615  
8,2,3311.810185  
8,2,3590.603723  
8,2,2393.117647  
8,2,2620.117857  
8,2,3014.826087  
8,2,1985.081633  
8,2,7565.090909  
8,2,2869.777778  
8,2,2828.331250  
8,2,2769.888889  
8,2,2459.578125  
8,2,2117.966146  
8,2,3896.640244  
8,2,3944.684211  
8,2,2689.566489

8,2,2760.576923  
8,2,2462.363636  
8,2,1520.063679  
8,2,3352.658088  
8,2,7165.302326  
8,2,3045.962766  
8,2,4638.951923  
8,2,1961.575000  
8,2,2565.114035  
8,2,1904.113636  
8,2,4056.312500  
8,2,4458.610795  
8,2,1950.032895  
8,2,4947.711538  
8,2,3451.272059  
8,2,3273.181818  
8,2,7849.390244  
8,2,9019.642857  
8,2,2153.955000  
8,2,1766.125000  
8,2,2230.814024  
8,2,1761.683544  
8,2,2369.771739  
8,2,1927.428571  
8,2,2819.204188  
8,2,6449.430000  
8,2,2455.737179  
8,2,7729.454545  
8,2,2458.250000  
8,2,4844.300000  
8,2,6253.078431  
8,2,1859.064516  
8,2,5883.341463  
8,2,3476.688776  
8,2,4975.500000  
8,2,4385.750000  
8,2,2028.535256  
8,2,2094.688889  
8,2,1871.320000  
8,2,3737.732143  
8,2,6976.577128  
8,2,2542.006993  
8,2,2875.978610  
8,2,4960.194149  
8,2,2880.785714  
8,2,4447.762948  
8,2,1742.951220  
8,2,178431.683333  
8,2,7365.458333  
8,2,5877.507212  
8,2,2340.902500  
8,2,3084.957447  
8,2,5503.934783  
8,2,1568.492647  
8,2,4256.691558  
8,2,6904.929577  
8,2,2472.157895  
8,2,3231.272059  
8,2,3220.631868  
8,2,1910.377358  
8,2,4012.521552  
8,2,2526.593220  
8,2,4016.111111  
8,2,4043.415865  
8,2,1768.869565  
8,2,4246.366477

8,2,4438.448980  
8,2,3393.416667  
8,2,13802.170732  
8,2,2445.174342  
8,2,2010.914062  
8,2,4822.562500  
8,2,2375.328125  
8,2,4353.878049  
8,2,4050.312500  
8,2,6846.054348  
8,2,4180.473684  
8,2,2171.366337  
8,2,3881.643519  
8,2,2169.133721  
8,2,2061.000000  
8,2,3001.378378  
8,2,1655.550532  
8,2,2678.975610  
8,2,2722.267361  
8,2,1968.140625  
8,2,6122.156667  
8,2,8584.696970  
8,2,1677.408537  
8,2,5653.215625  
8,2,8277.000000  
8,2,2440.706522  
8,2,2887.631098  
8,2,2345.227273  
8,2,2430.331522  
8,2,3874.922222  
8,2,2620.428571  
8,2,3722.500000  
8,2,1744.538265  
8,2,3208.095109  
8,2,1885.428571  
8,2,1501.291667  
8,2,16582.125000  
8,2,2912.889706  
8,2,7562.678571  
8,2,2050.071023  
8,2,1665.208333  
8,2,1645.432432  
8,2,2277.955882  
8,2,6315.750000  
8,2,2837.120968  
8,2,1658.093750  
8,2,1531.118421  
8,2,2485.416667  
8,2,9077.093085  
8,2,3394.548611  
8,2,3212.018382  
8,2,2024.900000  
8,2,5187.639706  
8,2,4968.115196  
8,2,10162.328488  
8,2,1570.577703  
8,2,2043.122283  
8,2,2542.352941  
8,2,2000.945122  
8,2,3139.730769  
8,2,4133.828431  
8,2,3298.641509  
8,2,2262.465116  
8,2,1519.635135  
8,2,2662.861842  
8,2,4310.950980

8,2,2636.460938  
8,2,1644.062500  
8,2,2192.762500  
8,2,3238.390625  
8,2,3549.990385  
8,2,5860.026596  
8,2,3225.066667  
8,2,3468.871951  
8,2,1679.756757  
8,2,3795.476190  
8,2,10061.672872  
8,2,1961.718137  
8,2,3627.035714  
8,2,2571.046632  
8,2,3361.836957  
8,2,3559.543353  
8,2,1935.279070  
8,2,1970.915625  
8,2,3837.000000  
8,2,1950.618750  
8,2,9883.337017  
8,2,4739.885621  
8,2,2444.333333  
8,2,1808.700000  
8,2,21539.568182  
8,2,3460.240000  
8,2,2258.312500  
8,2,5395.500000  
8,2,4334.042781  
8,2,10302.915730  
8,2,1677.945205  
8,2,2354.051282  
8,2,3624.242188  
8,2,6163.452830  
8,2,3986.440789  
8,2,1640.907407  
8,2,2313.319079  
8,2,5259.840686  
8,2,3560.206250  
8,2,3679.381466  
8,2,2057.893229  
8,2,5664.597087  
8,2,3664.164352  
8,2,2332.882812  
8,2,4475.406250  
8,2,1712.353659  
8,2,4157.909091  
8,2,2626.125000  
8,2,5000.984043  
8,2,4570.519231  
8,2,3367.365132  
8,2,2724.707921  
8,2,6952.893939  
8,2,1926.846995  
8,2,11245.103448  
8,2,2977.432065  
8,2,4876.026316  
8,2,1651.000000  
8,2,1811.722513  
8,2,2663.153846  
8,2,1572.104430  
8,2,2195.785326  
8,2,3199.294118  
8,2,1870.832317  
8,2,4152.395210  
8,2,3886.824074

8,2,1739.305288  
8,2,4169.666667  
8,2,2495.482955  
8,2,1592.793103  
8,2,9647.723214  
8,2,3168.289634  
8,2,1785.747283  
8,2,2220.239796  
8,2,2316.512500  
8,2,7537.268293  
8,2,9025.538462  
8,2,1839.103659  
8,2,9434.053977  
8,2,6490.516304  
8,2,6749.556452  
8,2,4932.500000  
8,2,2323.917763  
8,2,1780.776744  
8,2,6044.488571  
8,2,1898.312500  
8,2,4012.733796  
8,2,4460.163690  
8,2,2973.952381  
8,2,2616.250000  
8,2,2374.631579  
8,2,3293.684524  
8,2,5829.632979  
8,2,3126.620536  
8,2,1574.977273  
8,2,1823.391753  
8,2,1744.621212  
8,2,1522.236842  
8,2,2360.404255  
8,2,3826.383562  
8,2,9255.143617  
8,2,3259.189189  
8,2,9745.000000  
8,2,3881.416667  
8,2,1726.250000  
8,2,2363.616279  
8,2,2099.983553  
8,2,1554.395833  
8,2,2599.826087  
8,2,8024.548077  
8,2,2188.565217  
8,2,11357.793269  
8,2,2808.121622  
8,2,3926.256098  
8,2,4167.535714  
8,2,2211.200000  
8,2,2367.906977  
8,2,7217.944444  
8,2,3358.103571  
8,2,1850.597222  
8,2,3102.081967  
8,2,4526.875000  
8,2,3694.838710  
8,2,3164.795812  
8,2,1589.981595  
8,2,3668.659639  
8,2,3535.529412  
8,2,4545.327778  
8,2,9892.216837  
8,2,1731.655172  
8,2,8782.760000  
8,2,5046.833333

8,2,2678.458333  
8,2,2080.587838  
8,2,2062.908537  
8,2,3385.075758  
8,2,3719.237245  
8,2,2649.750000  
8,2,2434.756757  
8,2,5607.915698  
8,2,3116.487745  
8,2,1944.944444  
8,2,2140.065000  
8,2,4355.980769  
8,2,1666.391667  
8,2,6445.181818  
8,2,1741.354545  
8,2,3455.123762  
8,2,2317.722222  
8,2,1518.509804  
8,2,4414.000000  
8,2,2230.070513  
8,2,1858.320946  
8,2,2106.000000  
8,2,1502.720930  
8,2,1585.337500  
8,2,4762.869565  
8,2,4154.415730  
8,2,6367.600000  
8,2,1526.636364  
8,2,10725.446429  
8,2,2177.823529  
8,2,3021.184783  
8,2,3479.281609  
8,2,3431.922414  
8,2,3750.125000  
8,2,3510.591837  
8,2,2169.625000  
8,2,3508.346774  
8,2,29524.262755  
8,2,11297.500000  
8,2,1843.595395  
8,2,9357.688889  
8,2,2380.423077  
8,2,7693.683333  
8,2,1651.305233  
8,2,10434.327869  
8,2,1536.842105  
8,2,1843.079268  
8,2,2064.857988  
8,2,6093.843750  
8,2,5714.750000  
8,2,2393.716346  
8,2,9673.363636  
8,2,4947.971354  
8,2,4684.506726  
8,2,7949.107143  
8,2,4782.578947  
8,2,2281.000000  
8,2,3587.714674  
8,2,4520.654545  
8,2,3039.633745  
8,2,3604.223214  
8,2,7337.013158  
8,2,2030.894231  
8,2,5354.425000  
8,2,13886.462264  
8,2,3130.093750

8,2,10570.606707  
8,2,2621.243902  
8,2,7285.134146  
8,2,13087.416667  
8,2,3651.139535  
8,2,2634.291667  
8,2,2316.500000  
8,2,1611.441860  
8,2,3791.166667  
8,2,7778.000000  
8,2,2036.337963  
8,2,2265.456731  
8,2,3818.096774  
8,2,3249.357143  
8,2,2283.985507  
8,2,7164.877232  
8,2,3848.505319  
8,2,1501.671875  
8,2,7537.635417  
8,2,49315.032051  
8,2,2339.218750  
8,2,1917.928571  
8,2,1989.161932  
8,2,1578.141129  
8,2,2908.445946  
8,2,1913.621622  
8,2,3067.568627  
8,2,5359.263158  
8,2,5388.336364  
8,2,2467.902344  
8,2,3368.750000  
8,2,4765.030303  
8,2,2452.309524  
8,2,11402.550971  
8,2,3158.933333  
8,2,3975.080460  
8,2,3120.376884  
8,2,1888.812500  
8,2,3401.774869  
8,2,3409.850000  
8,2,1933.786842  
8,2,1934.958333  
8,2,1793.911932  
8,2,1987.363861  
8,2,1679.347826  
8,2,3801.818878  
8,2,2039.159375  
8,2,1965.093750  
8,2,10866.353774  
8,2,1810.190217  
8,2,1663.782051  
8,2,2889.625000  
8,2,3885.229167  
8,2,1915.828804  
8,2,6145.329268  
8,2,4886.157895  
8,2,1821.886076  
8,2,9405.512821  
8,2,10398.551913  
8,2,2284.500000  
8,2,5941.779891  
8,2,3935.042683  
8,2,3053.715116  
8,2,5549.857143  
8,2,5344.317935  
8,2,2387.790625

8,2,2321.554348  
8,2,1716.175000  
8,2,3226.184896  
8,2,1764.937500  
8,2,2136.105263  
8,2,1682.666667  
8,2,2747.333333  
8,2,1513.210366  
8,2,3013.421053  
8,2,2192.491071  
8,2,4952.959184  
8,2,3426.468750  
8,2,2085.255682  
8,2,18258.965909  
8,2,11018.880000  
8,2,12144.928191  
8,2,2898.147727  
8,2,1874.487805  
8,2,2337.000000  
8,2,2936.066176  
8,2,2799.976190  
8,2,6472.538306  
8,2,4223.156250  
8,2,1891.541667  
8,2,1577.818182  
8,2,3683.086538  
8,2,1947.633152  
8,2,5569.391304  
8,2,1520.875000  
8,2,1839.612500  
8,2,21445.355769  
8,2,3300.328804  
8,2,1840.945122  
8,2,3239.967949  
8,2,2830.997093  
8,2,2457.712766  
8,2,1645.562500  
8,2,11217.038462  
8,2,3803.725000  
8,2,2058.644608  
8,2,1532.195946  
8,2,2556.666667  
8,2,14701.500000  
8,2,2668.020833  
8,2,2370.828390  
8,2,8209.041667  
8,2,13695.100000  
8,2,1738.476744  
8,2,2963.263889  
8,2,2926.862319  
8,2,3228.312500  
8,2,4235.450000  
8,2,1726.740741  
8,2,2013.100000  
8,2,4095.861111  
8,2,2884.635870  
8,2,1884.570122  
8,2,2185.312500  
8,2,3574.656250  
8,2,3893.385246  
8,2,6054.926829  
8,2,1765.728261  
8,2,4482.173469  
8,2,3928.145833  
8,2,1899.023438  
8,2,4075.255319

8,2,2510.837500  
8,2,7650.707317  
8,2,4293.423077  
8,2,14220.475862  
8,2,2360.247642  
8,2,2757.952273  
8,2,6404.269022  
8,2,3358.442308  
8,2,6096.463415  
8,2,6200.542553  
8,2,3690.462500  
8,2,9688.541667  
8,2,4568.750000  
8,2,1646.229167  
8,2,2452.928191  
8,2,5768.529412  
8,2,1567.633523  
8,2,1996.558140  
8,2,4048.051020  
8,2,12998.947727  
8,2,2706.789474  
8,2,12701.925000  
8,2,1686.314010  
8,2,1503.161765  
8,2,2769.836538  
8,2,2833.492462  
8,2,4723.666667  
8,2,2148.750000  
8,2,36141.811170  
8,2,1629.646875  
8,2,2782.750000  
8,2,2975.940104  
8,2,2249.448276  
8,2,3431.045918  
8,2,3168.000000  
8,2,2328.353659  
8,2,4060.111702  
8,2,2890.990741  
8,2,11486.500000  
8,2,2178.812102  
8,2,5983.500000  
8,2,3276.083333  
8,2,2597.526316  
8,2,4692.343750  
8,2,1957.103226  
8,2,2279.971698  
8,2,3400.307927  
8,2,2573.924528  
8,2,3891.818750  
8,2,2626.785714  
8,2,1503.675532  
8,2,2865.688830  
8,2,2488.074468  
8,2,4973.545000  
8,2,2245.166667  
8,2,3312.968750  
8,2,4037.875000  
8,2,2043.083333  
8,2,1666.715909  
8,2,1659.461538  
8,2,3708.108696  
8,2,2540.250000  
8,2,2726.200000  
8,2,1783.315789  
8,2,4335.433594  
8,2,1753.818182

8,2,4002.798077  
8,2,3027.341837  
8,2,2009.783537  
8,2,5482.154255  
8,2,4053.525000  
8,2,4831.985849  
8,2,5031.620000  
8,2,2754.937500  
8,2,4904.000000  
8,2,13128.750000  
8,2,4106.413043  
8,2,1957.492347  
8,2,1838.388889  
8,2,3565.630952  
8,2,5887.250000  
8,2,1959.404605  
8,2,3261.520833  
8,2,7856.512195  
8,2,1622.871094  
8,2,5328.595745  
8,2,1567.239437  
8,2,12602.904661  
8,2,4927.500000  
8,2,2195.395833  
8,2,1802.972222  
8,2,14271.645270  
8,2,4829.669683  
8,2,5512.238342  
8,2,14792.142857  
8,2,1791.212766  
8,2,4141.210177  
8,2,2241.448087  
8,2,2028.618590  
8,2,2745.178771  
8,2,1952.722826  
8,2,3732.939189  
8,2,4095.843750  
8,2,2060.062500  
8,2,3571.659091  
8,2,5496.426471  
8,2,3477.090206  
8,2,3155.224490  
8,2,4012.585714  
8,2,3806.891447  
8,2,2307.833333  
8,2,3935.939891  
8,2,2822.931818  
8,2,2620.642857  
8,2,2030.142857  
8,2,12178.187500  
8,2,2993.195652  
8,2,1622.995370  
8,2,1662.036585  
8,2,2051.871795  
8,2,5064.421569  
8,2,3538.979167  
8,2,2919.318750  
8,2,5848.680233  
8,2,2403.304054  
8,2,2510.585714  
8,2,1550.246951  
8,2,5360.062500  
8,2,3882.323864  
8,2,4616.558824  
8,2,2190.725000  
8,2,3572.298913

8,2,4442.859043  
8,2,3442.730978  
8,2,1939.955357  
8,2,8946.562500  
8,2,15127.192073  
8,2,2780.454545  
8,2,23034.788043  
8,2,3195.179775  
8,2,4405.482143  
8,2,8299.343750  
8,2,1803.695312  
8,2,2809.959375  
8,2,1808.192308  
8,2,1714.842105  
8,2,4930.801508  
8,2,1824.412162  
8,2,2351.181818  
8,2,7279.776119  
8,2,3313.531250  
8,2,2518.652174  
8,2,4461.732558  
8,2,2009.789062  
8,2,1895.543919  
8,2,6125.912500  
8,2,1627.641667  
8,2,7864.162500  
8,2,2296.038690  
8,2,3685.250000  
8,2,2923.077778  
8,2,1961.285714  
8,2,4220.915179  
8,2,4488.559524  
8,2,6321.233333  
8,2,3926.009804  
8,2,4044.944767  
8,2,3546.157407  
8,2,7741.782609  
8,2,2553.290541  
8,2,5443.406250  
8,2,1585.243902  
8,2,2133.921053  
8,2,28514.139535  
8,2,1656.723684  
8,2,4521.573171  
8,2,6784.400000  
8,2,11207.796875  
8,2,3331.789773  
8,2,2343.500000  
8,2,1828.180147  
8,2,2062.375000  
8,2,2196.515957  
8,2,1836.229730  
8,2,1963.235294  
8,2,10411.325581  
8,2,5817.100000  
8,2,4655.688679  
8,2,6565.439024  
8,2,7280.657609  
8,2,7378.913043  
8,2,2049.648438  
8,2,2409.721591  
8,2,6652.785714  
8,2,6308.151442  
8,2,5384.687500  
8,2,2040.736842  
8,2,5960.035377

8,2,5682.416667  
8,2,5429.368750  
8,2,1982.736702  
8,2,1807.935714  
8,2,3768.166667  
8,2,9551.125000  
8,2,13665.482759  
8,2,1912.097561  
8,2,3548.600000  
8,2,8650.680000  
8,2,2072.244444  
8,2,3525.048387  
8,2,2237.343750  
8,2,1562.636364  
8,2,5372.004167  
8,2,1678.512195  
8,2,7104.676471  
8,2,4162.045226  
8,2,5428.977273  
8,2,1585.486239  
8,2,11040.293478  
8,2,1833.021277  
8,2,2793.513298  
8,2,1735.786585  
8,2,2237.293478  
8,2,4038.433333  
8,2,4424.375000  
8,2,2115.713816  
8,2,4312.954545  
8,2,4225.658537  
8,2,6007.255814  
8,2,4073.766026  
8,2,1709.861111  
8,2,5058.896552  
8,2,7806.240000  
8,2,7611.091270  
8,2,3755.639896  
8,2,2409.520833  
8,2,1689.555556  
8,2,148876.916667  
8,2,4541.994048  
8,2,1916.329670  
8,2,1898.665663  
8,2,1715.095238  
8,2,4367.000000  
8,2,4600.040000  
8,2,2250.057692  
8,2,1506.283163  
8,2,2740.176471  
8,2,3470.276442  
8,2,1816.651316  
8,2,14054.128889  
8,2,2736.061224  
8,2,1793.271875  
8,2,3731.380682  
8,2,2310.279070  
8,2,4595.051613  
8,2,3248.018229  
8,2,3742.195000  
8,2,7129.668605  
8,2,2030.960227  
8,2,1614.365385  
8,2,5759.670732  
8,2,3826.030488  
8,2,3769.285714  
8,2,4994.595982

8,2,2348.275000  
8,2,4933.791667  
8,2,11349.241379  
8,2,1511.630435  
8,2,3030.028302  
8,2,3712.431122  
8,2,4499.312500  
8,2,2202.985294  
8,2,1836.356707  
8,2,2438.000000  
8,2,2294.445652  
8,2,1713.177083  
8,2,4617.662500  
8,2,3542.780488  
8,2,1509.206250  
8,2,1853.166667  
8,2,2302.913462  
8,2,1934.095808  
8,2,5228.233173  
8,2,2139.694853  
8,2,4106.821429  
8,2,3942.735294  
8,2,2715.216346  
8,2,1980.677083  
8,2,2750.781646  
8,2,69089.276786  
8,2,7742.703488  
8,2,9430.875000  
8,2,4199.357923  
8,2,2562.574324  
8,2,6490.444444  
8,2,3381.654255  
8,2,1634.357843  
8,2,5512.472561  
8,2,14078.162791  
8,2,3254.666667  
8,2,3171.980000  
8,2,7551.140244  
8,2,1975.729651  
8,2,4075.306122  
8,2,2969.644022  
8,2,3268.118902  
8,2,6697.346939  
8,2,1787.152174  
8,2,3710.375000  
8,2,2696.590686  
8,2,10318.655612  
8,2,2303.013889  
8,2,1792.552632  
8,2,1594.750000  
8,2,3080.366667  
8,2,2794.468085  
8,2,7844.000000  
8,2,2592.666667  
8,2,3647.273438  
8,2,3002.395270  
8,2,2137.861111  
8,2,2755.284722  
8,2,7120.736842  
8,2,1695.670213  
8,2,8832.222222  
8,2,13128.070175  
8,2,1697.758152  
8,2,1684.673780  
8,2,4081.806818  
8,2,1793.372024

8,2,2325.360606  
8,2,1751.569079  
8,2,3522.750000  
8,2,4848.753788  
8,2,2479.385135  
8,2,1794.828571  
8,2,7873.239130  
8,2,1734.569444  
8,2,2871.083333  
8,2,5347.597222  
8,2,2328.592965  
8,2,2697.569149  
8,2,7330.943878  
8,2,3620.111702  
8,2,3664.428571  
8,2,3629.333333  
8,2,1607.256757  
8,2,5680.469388  
8,2,2807.215000  
8,2,6612.872642  
8,2,2316.536458  
8,2,2234.841146  
8,2,1720.750000  
8,2,1824.196875  
8,2,9042.708333  
8,2,1725.375000  
8,2,2438.544554  
8,2,2474.083333  
8,2,1947.037500  
8,2,4244.725000  
8,2,1693.472067  
8,2,2326.437500  
8,2,2335.975000  
8,2,13737.745536  
8,2,2746.373457  
8,2,1806.375000  
8,2,2908.887500  
8,2,10051.137500  
8,2,1995.400000  
8,2,2324.042339  
8,2,4728.666667  
8,2,3078.916667  
8,2,1755.508929  
8,2,2275.439516  
8,2,2879.955357  
8,2,8090.461735  
8,2,4827.186047  
8,2,2261.875000  
8,2,3688.336310  
8,2,1685.540000  
8,2,1846.446809  
8,2,3834.455000  
8,2,3844.844444  
8,2,1740.921053  
8,2,2389.891304  
8,2,3921.580729  
8,2,1867.433594  
8,2,2122.818182  
8,2,2320.841667  
8,2,6189.826087  
8,2,3296.262195  
8,2,1927.242188  
8,2,1724.296089  
8,2,11368.516393  
8,2,3622.887500  
8,2,2222.062500

8,2,2382.866279  
8,2,1896.502907  
8,2,4232.439904  
8,2,1749.152778  
8,2,2161.163462  
8,2,6612.648438  
8,2,2437.448370  
8,2,2958.537791  
8,2,1807.057377  
8,2,6153.934555  
8,2,1730.104651  
8,2,1590.177632  
8,2,2450.615854  
8,2,2145.725000  
8,2,2825.775000  
8,2,1598.378125  
8,2,3513.490000  
8,2,4077.578125  
8,2,1607.857955  
8,2,5609.647959  
8,2,2033.700000  
8,2,1795.871345  
8,2,1867.319892  
8,2,8726.000000  
8,2,6740.994737  
8,2,2657.076923  
8,2,30454.410714  
8,2,4777.875000  
8,2,4091.567500  
8,2,8942.546875  
8,2,6557.160256  
8,2,1585.250000  
8,2,24296.951923  
8,2,3824.290323  
8,2,7485.500000  
8,2,6604.755814  
8,2,17061.212195  
8,2,1718.400000  
8,2,4015.362245  
8,2,11540.165179  
8,2,2229.097561  
8,2,1569.865132  
8,2,6861.796875  
8,2,9111.642500  
8,2,9428.941667  
8,2,1800.996711  
8,2,2458.077586  
8,2,3221.355769  
8,2,6258.861842  
8,2,1941.845238  
8,2,3783.709239  
8,2,1584.250000  
8,2,2553.160714  
8,2,3270.070652  
8,2,8231.108696  
8,2,5050.259434  
8,2,1895.615385  
8,2,2163.192073  
8,2,4714.010417  
8,2,1977.535377  
8,2,2273.755952  
8,2,2980.868056  
8,2,1919.489362  
8,2,1613.875000  
8,2,2239.012755  
8,2,2210.114583

8,2,1596.844595  
8,2,4200.988839  
8,2,2217.075000  
8,2,2925.800000  
8,2,1617.955882  
8,2,3265.178241  
8,2,4642.948718  
8,2,1624.500000  
8,2,1802.128205  
8,2,12128.149390  
8,2,2363.000000  
8,2,2477.128378  
8,2,15292.067308  
8,2,9879.863636  
8,2,2610.045455  
8,2,2120.562500  
8,2,2814.788889  
8,2,2754.833333  
8,2,3991.523256  
8,2,9813.294444  
8,2,11329.328846  
8,2,7966.725000  
8,2,3298.912234  
8,2,1752.790698  
8,2,1681.818182  
8,2,1537.645270  
8,2,2792.406250  
8,2,9861.630859  
8,2,3619.510695  
8,2,2817.579909  
8,2,4858.434524  
8,2,7881.573864  
8,2,5512.250000  
8,2,2122.947368  
8,2,6040.554054  
8,2,2954.757576  
8,2,5267.648515  
8,2,17855.983240  
8,2,4295.546512  
8,2,2836.353125  
8,2,2070.386364  
8,2,2680.412234  
8,2,1632.525568  
8,2,4888.000000  
8,2,1895.750000  
8,2,5185.106383  
8,2,7695.228723  
8,2,1902.175676  
8,2,1732.984925  
8,2,7889.010695  
8,2,2872.472500  
8,2,2322.552486  
8,2,5783.027027  
8,2,2283.234043  
8,2,7495.285714  
8,2,2970.375000  
8,2,2272.250000  
8,2,1911.000000  
8,2,4315.250000  
8,2,4320.590116  
8,2,13874.206522  
8,2,2180.622222  
8,2,2172.923077  
8,2,1773.114130  
8,2,6586.250000  
8,2,30238.546512

8,2,3221.478261  
8,2,1784.295139  
8,2,2851.323718  
8,2,2051.297872  
8,2,10748.470588  
8,2,5591.133621  
8,2,2424.554878  
8,2,1652.469388  
8,2,5587.766667  
8,2,3745.392857  
8,2,1605.947674  
8,2,3932.032258  
8,2,2455.843750  
8,2,2306.100000  
8,2,1560.843750  
8,2,3574.338583  
8,2,1949.756757  
8,2,6224.125000  
8,2,3523.253378  
8,2,4412.572917  
8,2,8195.425532  
8,2,7801.235294  
8,2,3321.684783  
8,2,1790.725446  
8,2,4308.043103  
8,2,3115.458333  
8,2,2476.582237  
8,2,1631.891892  
8,2,1570.300000  
8,2,2131.109756  
8,2,2142.478261  
8,2,5712.491848  
8,2,2255.762821  
8,2,3858.671875  
8,2,3527.221698  
8,2,4271.891892  
8,2,1619.250000  
8,2,2415.458333  
8,2,3112.299528  
8,2,2701.591667  
8,2,2407.054878  
8,2,2830.762019  
8,2,3282.054348  
8,2,4016.769231  
8,2,2545.641892  
8,2,2767.244318  
8,2,3656.940000  
8,2,2354.575000  
8,2,6572.285714  
8,2,2656.437500  
8,2,13534.290000  
8,2,1883.780405  
8,2,4219.290640  
8,2,4020.456731  
8,2,2573.562500  
8,2,4617.093750  
8,2,1577.659884  
8,2,1585.250000  
8,2,5082.345455  
8,2,4465.935811  
8,2,6101.804348  
8,2,32152.372222  
8,2,12257.769231  
8,2,2244.210843  
8,2,8131.083333  
8,2,2942.289062

8,2,4284.573980  
8,2,2498.780660  
8,2,4687.915698  
8,2,5131.711111  
8,2,6018.855556  
8,2,16173.212766  
8,2,13408.658163  
8,2,1544.333333  
8,2,1565.055233  
8,2,1736.337079  
8,2,3644.541667  
8,2,2432.765957  
8,2,2246.031250  
8,2,2487.581395  
8,2,2077.405488  
8,2,6512.430556  
8,2,1689.134615  
8,2,2675.648649  
8,2,6325.041667  
8,2,2703.280000  
8,2,4618.375000  
8,2,3614.315789  
8,2,1959.243750  
8,2,2024.059896  
8,2,3150.166667  
8,2,4818.573171  
8,2,4207.790323  
8,2,6141.341667  
8,2,5655.546875  
8,2,2498.316176  
8,2,1715.076389  
8,2,4279.400000  
8,2,1941.705882  
8,2,1890.627604  
8,2,4762.937500  
8,2,5984.655488  
8,2,2023.904255  
8,2,2203.114286  
8,2,2180.406977  
8,2,2140.335664  
8,2,3024.281250  
8,2,2004.297297  
8,2,2027.886905  
8,2,6080.174528  
8,2,4204.132212  
8,2,2215.187500  
8,2,1927.697674  
8,2,4436.468750  
8,2,1723.946023  
8,2,8783.262821  
8,2,8972.781250  
8,2,2509.967391  
8,2,1743.594697  
8,2,2759.462500  
8,2,4334.776596  
8,2,2853.300000  
8,2,2561.074468  
8,2,12727.562500  
8,2,4600.000000  
8,2,2230.451087  
8,2,5572.222222  
8,2,1543.875000  
8,2,1633.833333  
8,2,2713.558511  
8,2,1734.201087  
8,2,3337.051471

8,2,6046.647500  
8,2,1655.894737  
8,2,1601.450000  
8,2,10418.436019  
8,2,3758.698565  
8,2,4411.272727  
8,2,12956.665816  
8,2,3204.262195  
8,2,2371.436047  
8,2,2474.750000  
8,2,6052.222222  
8,2,1875.502451  
8,2,6026.898585  
8,2,3008.742424  
8,2,2324.800000  
8,2,4100.431818  
8,2,2713.031863  
8,2,8476.973684  
8,2,5342.500000  
8,2,2540.919444  
8,2,2371.834184  
8,2,1995.420732  
8,2,1529.541667  
8,2,11382.817073  
8,2,7134.560811  
8,2,2003.319149  
8,2,2191.317130  
8,2,2055.866071  
8,2,3285.614796  
8,2,4947.173077  
8,2,4009.921875  
8,2,1569.178571  
8,2,1777.401515  
8,2,5909.872159  
8,2,1520.176020  
8,2,4380.930288  
8,2,2320.386364  
8,2,7000.041667  
8,2,2707.421053  
8,2,5925.950893  
8,2,3687.930233  
8,2,3221.730000  
8,2,6383.000000  
8,2,7965.578125  
8,2,1616.295732  
8,2,1751.490625  
8,2,3550.823529  
8,2,1872.312500  
8,2,1544.117647  
8,2,5017.720000  
8,2,2117.810976  
8,2,6789.986979  
8,2,4294.506410  
8,2,19426.454918  
8,2,2216.780488  
8,2,2777.642857  
8,2,2998.985577  
8,2,3744.772727  
8,2,3640.243421  
8,2,7813.869898  
8,2,5042.687500  
8,2,1672.250000  
8,2,2009.722973  
8,2,1959.366071  
8,2,24614.713415  
8,2,4552.115385

8,2,3621.573171  
8,2,10653.260870  
8,2,3470.187500  
8,2,2710.987500  
8,2,1616.680556  
8,2,2349.996622  
8,2,5162.862069  
8,2,3110.327815  
8,2,1688.691099  
8,2,2672.000000  
8,2,1912.451923  
8,2,2759.675000  
8,2,10845.937500  
8,2,3817.750000  
8,2,1786.449405  
8,2,4210.268750  
8,2,2288.250000  
8,2,6558.858173  
8,2,1574.718750  
8,2,5598.902778  
8,2,2031.892857  
8,2,1694.923611  
8,2,2753.932692  
8,2,2640.170213  
8,2,2883.003906  
8,2,1661.211538  
8,2,1662.864362  
8,2,1747.363874  
8,2,4846.734694  
8,2,2225.467105  
8,2,3854.750000  
8,2,2359.796196  
8,2,2835.310811  
8,2,9125.243697  
8,2,4820.630332  
8,2,1703.019737  
8,2,7394.812500  
8,2,9054.750000  
8,2,6540.173913  
8,2,11975.968000  
8,2,2257.052419  
8,2,2462.972222  
8,2,2758.493421  
8,2,5308.819767  
8,2,2631.862245  
8,2,3986.706522  
8,2,1791.250000  
8,2,3671.250000  
8,2,5043.481283  
8,2,2669.553571  
8,2,2073.181818  
8,2,1772.269231  
8,2,5840.516447  
8,2,2651.392857  
8,2,3849.115000  
8,2,5435.285714  
8,2,4924.020000  
8,2,4697.673913  
8,2,1701.176020  
8,2,2461.172222  
8,2,2036.371875  
8,2,1855.764706  
8,2,3172.839844  
8,2,1842.189189  
8,2,1779.884393  
8,2,3324.456522

8,2,2572.250000  
8,2,3389.930851  
8,2,5970.361607  
8,2,4258.066327  
8,2,2674.006250  
8,2,4071.947368  
8,2,2023.829787  
8,2,3823.484375  
8,2,1573.127660  
8,2,2205.644444  
8,2,1781.151042  
8,2,5681.225877  
8,2,1684.671875  
8,2,2811.718750  
8,2,4540.125000  
8,2,2749.703125  
8,2,6071.812500  
8,2,3243.856250  
8,2,5192.916667  
8,2,4793.525000  
8,2,2934.384615  
8,2,4125.937500  
8,2,7728.881579  
8,2,1583.597222  
8,2,1596.788043  
8,2,3483.526316  
8,2,2727.286184  
8,2,3588.123288  
8,2,2011.418367  
8,2,3680.375000  
8,2,2878.392157  
8,2,3866.704433  
8,2,4159.288462  
8,2,1643.150000  
8,2,4497.718391  
8,2,3396.695122  
8,2,3578.909091  
8,2,2009.643750  
8,2,3586.873239  
8,2,2612.942308  
8,2,4897.640000  
8,2,3591.777778  
8,2,2090.863636  
8,2,8017.000000  
8,2,4265.020833  
8,2,10162.758929  
8,2,4167.030488  
8,2,1721.045455  
8,2,2052.555921  
8,2,2011.717262  
8,2,3743.577778  
8,2,3190.982955  
8,2,1534.338415  
8,2,2017.214286  
8,2,5899.703125  
8,2,5762.913043  
8,2,1732.657143  
8,2,3124.721519  
8,2,2912.333333  
8,2,4398.650000  
8,2,4189.529255  
8,2,3009.975490  
8,2,4089.812500  
8,2,2586.865385  
8,2,4544.232558  
8,2,4221.111842

8,2,1820.446429  
8,2,1921.585714  
8,2,8371.409884  
8,2,3759.333333  
8,2,5069.734375  
8,2,9685.246154  
8,2,7766.500000  
8,2,2713.041667  
8,2,5284.590164  
8,2,3563.215000  
8,2,2502.468750  
8,2,4377.144330  
8,2,3106.916667  
8,2,2370.533654  
8,2,11010.450000  
8,2,2464.895408  
8,2,3793.250000  
8,2,7346.044118  
8,2,4520.677083  
8,2,1561.391892  
8,2,2194.908088  
8,2,2374.605263  
8,2,9557.531977  
8,2,2539.803571  
8,2,1666.148026  
8,2,9821.171053  
8,2,3680.946875  
8,2,2021.198324  
8,2,4423.833333  
8,2,1631.557692  
8,2,2067.279070  
8,2,4226.220395  
8,2,3870.687500  
8,2,1902.482143  
8,2,1972.815625  
8,2,5946.230769  
8,2,3758.928571  
8,2,1902.604592  
8,2,1743.159091  
8,2,6031.000000  
8,2,7307.125000  
8,2,4927.161058  
8,2,4890.043750  
8,2,2222.153061  
8,2,1540.367347  
8,2,3425.049342  
8,2,2395.442308  
8,2,3545.563889  
8,2,1757.408163  
8,2,2977.200472  
8,2,6565.785714  
8,2,3658.195652  
8,2,6924.125000  
8,2,1693.064024  
8,2,2320.668478  
8,2,12203.769231  
8,2,3271.664894  
8,2,7998.704545  
8,2,2216.644444  
8,2,2746.815217  
8,2,1812.342105  
8,2,20932.640110  
8,2,1853.786932  
8,2,9980.935484  
8,2,2372.298077  
8,2,7245.688830

8,2,6135.440678  
8,2,1859.250000  
8,2,1932.485000  
8,2,3171.250000  
8,2,1894.183333  
8,2,2347.265306  
8,2,3212.508671  
8,2,2565.021277  
8,2,3098.000000  
8,2,2005.198171  
8,2,3909.850000  
8,2,2267.000000  
8,2,2249.914894  
8,2,5136.333333  
8,2,5505.058824  
8,2,1749.433511  
8,2,7953.956522  
8,2,3122.121622  
8,2,2726.629310  
8,2,1658.296875  
8,2,7514.320175  
8,2,2245.307692  
8,2,2069.750000  
8,2,1761.617801  
8,2,3243.217949  
8,2,4988.508772  
8,2,4414.056818  
8,2,7105.250000  
8,2,2239.437500  
8,2,7169.991848  
8,2,1561.224359  
8,2,5309.230769  
8,2,3317.899457  
8,2,8625.026596  
8,2,2006.395480  
8,2,3476.672414  
8,2,3535.193548  
8,2,4638.457447  
8,2,2964.197368  
8,2,5425.116477  
8,2,5470.926136  
8,2,2033.909314  
8,2,7810.085366  
8,2,1754.264706  
8,2,2199.005952  
8,2,22094.450472  
8,2,5334.484649  
8,2,3716.815217  
8,2,1945.052885  
8,2,1934.445122  
8,2,2026.480392  
8,2,3641.711538  
8,2,7694.062500  
8,2,5755.857143  
8,2,3365.000000  
8,2,7901.463542  
8,2,2202.008333  
8,2,2344.032609  
8,2,4929.250000  
8,2,1992.576923  
8,2,2031.075658  
8,2,5847.375000  
8,2,4718.020349  
8,2,6548.590909  
8,2,3427.265625  
8,2,1504.337209

8,2,2609.489474  
8,2,1895.393750  
8,2,2886.779605  
8,2,1592.846154  
8,2,1822.750000  
8,2,1749.170139  
8,2,2930.768750  
8,2,5695.207547  
8,2,1574.137500  
8,2,7537.015625  
8,2,3350.267544  
8,2,2639.653061  
8,2,1874.437500  
8,2,19897.256579  
8,2,47136.432143  
8,2,7628.012500  
8,2,2424.062500  
8,2,4228.164894  
8,2,8714.616071  
8,2,22521.048780  
8,2,8570.000000  
8,2,2499.190476  
8,2,5385.622449  
8,2,5465.181818  
8,2,7284.586735  
8,2,2628.542553  
8,2,2074.844595  
8,2,2421.837209  
8,2,4603.063830  
8,2,5368.302326  
8,2,4950.991848  
8,2,2054.031250  
8,2,2604.970443  
8,2,1549.397790  
8,2,2531.493333  
8,2,1654.232955  
8,2,3104.658163  
8,2,2999.061224  
8,2,1535.486842  
8,2,3761.450000  
8,2,1835.862500  
8,2,2560.590909  
8,2,2932.160156  
8,2,2402.366071  
8,2,1697.187500  
8,2,7672.137755  
8,2,3024.271739  
8,2,3934.204082  
8,2,10069.411458  
8,2,2558.291667  
8,2,1667.986413  
8,2,2280.411765  
8,2,6068.995690  
8,2,3081.643617  
8,2,2043.261628  
8,2,2370.616071  
8,2,2198.894231  
8,2,4834.846939  
8,2,1885.673469  
8,2,3916.970395  
8,2,2699.387500  
8,2,1828.142487  
8,2,3390.758065  
8,2,2059.489130  
8,2,2204.232143  
8,2,3028.130319

8,2,3640.630556  
8,2,2245.361842  
8,2,1822.250000  
8,2,4378.163043  
8,2,2019.782051  
8,2,2142.945946  
8,2,4807.930233  
8,2,6900.027778  
8,2,1817.115196  
8,2,1776.960526  
8,2,3493.586486  
8,2,9584.931641  
8,2,3260.468750  
8,2,3531.462264  
8,2,1999.605469  
8,2,2596.414773  
8,2,1514.273810  
8,2,2390.526316  
8,2,1960.743902  
8,2,2728.400966  
8,2,1501.107143  
8,2,2370.545455  
8,2,3005.699324  
8,2,6414.581395  
8,2,2973.291667  
8,2,1816.437500  
8,2,3627.941406  
8,2,5680.056818  
8,2,1696.360000  
8,2,3160.734694  
8,2,2842.181818  
8,2,6432.687500  
8,2,1797.175676  
8,2,2057.728125  
8,2,2032.340426  
8,2,4450.305556  
8,2,4851.000000  
8,2,7343.555556  
8,2,4096.875000  
8,2,3904.333333  
8,2,2288.223214  
8,2,3779.762195  
8,2,2868.368056  
8,2,2298.555556  
8,2,4974.404412  
8,2,3288.114583  
8,2,2279.393519  
8,2,8010.558824  
8,2,1943.555556  
8,2,2381.074219  
8,2,2022.250000  
8,2,5457.572816  
8,2,7764.971014  
8,2,32293.671196  
8,2,2469.614583  
8,2,5899.192308  
8,2,3240.831731  
8,2,1727.284884  
8,2,1962.950820  
8,2,1612.105263  
8,2,5990.194712  
8,2,1610.750000  
8,2,2956.575000  
8,2,2993.452128  
8,2,1864.745370  
8,2,5027.840278

8,2,4353.551724  
8,2,2509.765625  
8,2,7834.178363  
8,2,1684.078947  
8,2,2411.898204  
8,2,3679.532164  
8,2,1708.592500  
8,2,1502.041667  
8,2,1607.125000  
8,2,2688.870000  
8,2,2634.248649  
8,2,3056.246512  
8,2,2364.111413  
8,2,3351.463415  
8,2,2460.552632  
8,2,4273.625000  
8,2,4803.500000  
8,2,4912.287234  
8,2,11989.860465  
8,2,1502.587500  
8,2,3369.598837  
8,2,4899.092965  
8,2,2170.480263  
8,2,9613.727564  
8,2,5380.915789  
8,2,9366.157500  
8,2,3504.540816  
8,2,7001.400000  
8,2,2188.218750  
8,2,14813.217391  
8,2,1875.421512  
8,2,1957.594595  
8,2,1890.561224  
8,2,2152.886364  
8,2,1653.278846  
8,2,2958.660000  
8,2,1834.750000  
8,2,2681.895349  
8,2,6662.177778  
8,2,1839.500000  
8,2,2012.350000  
8,2,3918.212209  
8,2,4594.064286  
8,2,2343.721875  
8,2,1555.244681  
8,2,20646.321429  
8,2,3502.682143  
8,2,4129.750000  
8,2,2430.634868  
8,2,3204.673295  
8,2,1925.188889  
8,2,3379.593750  
8,2,5812.699074  
8,2,2274.679487  
8,2,11250.750000  
8,2,2815.648936  
8,2,6487.333333  
8,2,4306.071429  
8,2,4022.460526  
8,2,2750.218750  
8,2,1724.601351  
8,2,2091.957317  
8,2,9915.625000  
8,2,11209.614035  
8,2,3181.102941  
8,2,5270.187500

8,2,2814.901163  
8,2,7714.186275  
8,2,3923.223684  
8,2,2537.881356  
8,2,1750.969512  
8,2,1632.468750  
8,2,18268.857143  
8,2,9668.260465  
8,2,2543.029891  
8,2,3889.188976  
8,2,8532.909091  
8,2,1621.355263  
8,2,2389.092179  
8,2,6845.265957  
8,2,3713.792553  
8,2,2723.079787  
8,2,2069.507212  
8,2,3155.343750  
8,2,6460.429348  
8,2,1557.776730  
8,2,1837.634615  
8,2,2242.386628  
8,2,2365.162500  
8,2,3770.488636  
8,2,11921.583333  
8,2,2132.565217  
8,2,2802.955556  
8,2,1581.273810  
8,2,3376.425532  
8,2,4075.007109  
8,2,2379.906250  
8,2,3707.578125  
8,2,3196.354167  
8,2,1746.744792  
8,2,12863.396341  
8,2,2511.994565  
8,2,5350.894737  
8,2,7151.062500  
8,2,8937.305556  
8,2,1625.214286  
8,2,5845.346154  
8,2,3025.190217  
8,2,8294.402439  
8,2,11760.754464  
8,2,2174.000000  
8,2,1898.865854  
8,2,1903.310127  
8,2,3864.781915  
8,2,11402.729167  
8,2,3958.234756  
8,2,2070.160000  
8,2,1711.900000  
8,2,10140.274590  
8,2,1897.531250  
8,2,10521.788462  
8,2,9700.872340  
8,2,5394.909722  
8,2,6145.741848  
8,2,5033.300000  
8,2,4065.861111  
8,2,2273.194767  
8,2,4192.350000  
8,2,1526.003378  
8,2,1576.475000  
8,2,2182.581633  
8,2,1614.242515

8,2,3775.219595  
8,2,4748.222222  
8,2,2010.127778  
8,2,6226.734694  
8,2,2685.028846  
8,2,2615.541667  
8,2,2638.462366  
8,2,1734.104167  
8,2,17497.446809  
8,2,5254.272727  
8,2,12123.217391  
8,2,2317.803977  
8,2,4110.541667  
8,2,3452.235294  
8,2,1771.674051  
8,2,5665.647727  
8,2,3992.300000  
8,2,5484.168750  
8,2,2455.036585  
8,2,10779.666667  
8,2,2498.193182  
8,2,1724.312500  
8,2,1930.810811  
8,2,2152.444737  
8,2,3065.402439  
8,2,4462.891304  
8,2,3148.771739  
8,2,5876.237245  
8,2,2046.669643  
8,2,2098.511628  
8,2,1860.196429  
8,2,2620.013889  
8,2,9228.840909  
8,2,4480.723404  
8,2,1534.222826  
8,2,6200.973684  
8,2,2186.750000  
8,2,3314.994898  
8,2,4059.360465  
8,2,21616.490132  
8,2,2127.703125  
8,2,1841.847222  
8,2,1807.125000  
8,2,2017.294872  
8,2,2401.687500  
8,2,2362.570000  
8,2,3887.673077  
8,2,3773.593750  
8,2,1868.375000  
8,2,1617.666667  
8,2,3919.111111  
8,2,2925.865132  
8,2,1579.500000  
8,2,10952.435897  
8,2,9726.833333  
8,2,1698.663265  
8,2,2967.000000  
8,2,3209.500000  
8,2,5444.813084  
8,2,2088.866667  
8,2,6517.926829  
8,2,5670.875000  
8,2,1645.753571  
8,2,3208.441327  
8,2,2911.991667  
8,2,5223.973684

8,2,11938.907609  
8,2,2904.605263  
8,2,2688.312500  
8,2,2707.775510  
8,2,4531.777778  
8,2,2141.753049  
8,2,3764.477273  
8,2,2729.650000  
8,2,3922.063830  
8,2,1880.250000  
8,2,1550.176829  
8,2,4397.968750  
8,2,1509.956250  
8,2,3991.401316  
8,2,3874.847500  
8,2,5011.889831  
8,2,2027.210526  
8,2,1716.150000  
8,2,6638.900510  
8,2,7572.137255  
8,2,2398.592391  
8,2,1538.447674  
8,2,2797.589744  
8,2,2467.053571  
8,2,1531.209184  
8,2,2637.360465  
8,2,3304.969388  
8,2,3299.919598  
8,2,4608.187500  
8,2,3023.076923  
8,2,8018.045455  
8,2,4316.000000  
8,2,2663.916667  
8,2,7162.720395  
8,2,2029.596939  
8,2,9148.050000  
8,2,3472.958333  
8,2,1977.184524  
8,2,2977.593750  
8,2,3911.507812  
8,2,2468.506250  
8,2,1629.171053  
8,2,1926.975610  
8,2,4289.895000  
8,2,9152.842105  
8,2,3660.525000  
8,2,1527.928571  
8,2,1548.125000  
8,2,2603.032609  
8,2,5694.475000  
8,2,2484.695946  
8,2,1805.616379  
8,2,3409.220238  
8,2,3188.702830  
8,2,3555.224490  
8,2,1664.750000  
8,2,3325.875000  
8,2,6661.303922  
8,2,2151.362903  
8,2,3126.074324  
8,2,2060.636364  
8,2,6797.375000  
8,2,2399.650000  
8,2,4643.643617  
8,2,4773.445946  
8,2,2525.646259

8,2,12348.387097  
8,2,2409.729787  
8,2,3323.214286  
8,2,1561.529255  
8,2,2561.724359  
8,2,1987.223684  
8,2,3009.750000  
8,2,1772.989362  
8,2,9939.594828  
8,2,1793.849693  
8,2,2384.043243  
8,2,13288.478873  
8,2,1678.150000  
8,2,3183.137255  
8,2,1782.897436  
8,2,6911.355769  
8,2,2065.648810  
8,2,5425.941176  
8,2,6371.250000  
8,2,3501.044271  
8,2,2368.300000  
8,2,1736.741071  
8,2,5355.967593  
8,2,8416.783898  
8,2,1833.750000  
8,2,2083.528846  
8,2,6667.139535  
8,2,2883.217391  
8,2,6999.885870  
8,2,3540.034091  
8,2,2550.250000  
8,2,2411.151163  
8,2,4564.918103  
8,2,1875.274011  
8,2,5704.872642  
8,2,4407.329268  
8,2,2749.208333  
8,2,8527.087838  
8,2,2627.340000  
8,2,13707.702128  
8,2,10979.121622  
8,2,6088.420732  
8,2,2790.671053  
8,2,2404.700000  
8,2,2012.393548  
8,2,1928.039894  
8,2,7213.706897  
8,2,1703.926471  
8,2,4239.989130  
8,2,6887.825000  
8,2,1783.333333  
8,2,1706.146341  
8,2,1620.956731  
8,2,9589.226415  
8,2,3170.837500  
8,2,11248.315000  
8,2,6927.020202  
8,2,3378.073864  
8,2,5957.840426  
8,2,3527.966480  
8,2,10728.337900  
8,2,7665.206897  
8,2,3390.511029  
8,2,2707.788265  
8,2,8103.557065  
8,2,2430.367500

8,2,2007.907407  
8,2,7177.085366  
8,2,3107.283163  
8,2,1852.842949  
8,2,2056.958333  
8,2,2832.285714  
8,2,2016.709821  
8,2,4760.434524  
8,2,2002.750000  
8,2,12703.277778  
8,2,4576.550532  
8,2,5739.180233  
8,2,1734.486111  
8,2,8977.970430  
8,2,1723.000000  
8,2,2580.911290  
8,2,3474.533163  
8,2,2174.743243  
8,2,1543.511628  
8,2,2599.902439  
8,2,2346.551887  
8,2,2140.486111  
8,2,4196.250000  
8,2,1552.273438  
8,2,1520.745763  
8,2,3234.765957  
8,2,4337.847222  
8,2,3693.947368  
8,2,3043.024194  
8,2,4559.062500  
8,2,9432.774123  
8,2,1869.276596  
8,2,1537.508152  
8,2,2245.730263  
8,2,2481.212963  
8,2,4425.120000  
8,2,1871.283784  
8,2,1934.476744  
8,2,4339.277778  
8,2,6237.613636  
8,2,4665.514881  
8,2,4677.000000  
8,2,3485.539634  
8,2,1809.612981  
8,2,1941.631098  
8,2,3855.500000  
8,2,1967.511905  
8,2,1517.320652  
8,2,6115.191489  
8,2,12436.011976  
8,2,2859.428125  
8,2,1774.243243  
8,2,1616.285714  
8,2,8407.304878  
8,2,11768.444444  
8,2,6501.781250  
8,2,22310.509615  
8,2,2668.481132  
8,2,2373.560096  
8,2,4399.567039  
8,2,1511.173611  
8,2,4844.786127  
8,2,8936.446629  
8,2,3621.073333  
8,2,2119.754601  
8,2,2404.950739

8,2,5224.976852  
8,2,2721.326923  
8,2,10152.675000  
8,2,4866.914773  
8,2,2240.750000  
8,2,3088.383152  
8,2,2678.750000  
8,2,5021.129717  
8,2,7920.899457  
8,2,4430.350299  
8,2,6101.201258  
8,2,2789.073171  
8,2,3870.428571  
8,2,3363.717391  
8,2,2697.733333  
8,2,5590.539062  
8,2,5854.090909  
8,2,1637.563830  
8,2,1886.303191  
8,2,14856.701220  
8,2,1997.300000  
8,2,1670.701220  
8,2,3370.000000  
8,2,2166.632812  
8,2,4792.737805  
8,2,4748.725000  
8,2,2764.578035  
8,2,2214.852349  
8,2,3317.668394  
8,2,5368.703704  
8,2,14983.159274  
8,2,1867.571429  
8,2,8180.112069  
8,2,3770.895833  
8,2,8042.744048  
8,2,1982.973684  
8,2,1975.009146  
8,2,6349.400000  
8,2,1506.862500  
8,2,5519.478723  
8,2,1790.802632  
8,2,1691.927152  
8,2,2317.472222  
8,2,5652.300613  
8,2,2370.590909  
8,2,5542.625000  
8,2,1838.090452  
8,2,1709.364130  
8,2,2481.218750  
8,2,12040.714286  
8,2,2343.109043  
8,2,2947.987179  
8,2,11021.934524  
8,2,3027.122093  
8,2,2640.514151  
8,2,20906.038462  
8,2,6154.382812  
8,2,4631.867647  
8,2,8615.475000  
8,2,2634.786585  
8,2,3387.089286  
8,2,1606.093750  
8,2,1687.237805  
8,2,6642.625000  
8,2,7111.689655  
8,2,1553.048780

8,2,1659.360190  
8,2,3758.415865  
8,2,2353.821429  
8,2,5654.389535  
8,2,1745.408333  
8,2,3249.112981  
8,2,2397.996429  
8,2,4435.350000  
8,2,3057.133333  
8,2,1558.451220  
8,2,7662.660326  
8,2,2416.838235  
8,2,20379.558511  
8,2,6195.711735  
8,2,10917.692308  
8,2,6953.805851  
8,2,1864.756410  
8,2,2655.673077  
8,2,4179.961735  
8,2,1816.978723  
8,2,6028.615385  
8,2,5580.825000  
8,2,3604.833333  
8,2,4025.177326  
8,2,4146.337838  
8,2,2471.901163  
8,2,12330.253333  
8,2,2787.000000  
8,2,1674.195652  
8,2,4239.597222  
8,2,2022.908333  
8,2,4448.058824  
8,2,11275.039474  
8,2,3678.819149  
8,2,1522.513889  
8,2,2036.885135  
8,2,2552.264205  
8,2,3330.708333  
8,2,45873.340385  
8,2,5559.686047  
8,2,3976.675676  
8,2,6338.076923  
8,2,3829.318750  
8,2,2713.964286  
8,2,13292.247642  
8,2,3679.437500  
8,2,2045.202703  
8,2,2891.075000  
8,2,3451.630682  
8,2,4167.611732  
8,2,2857.975610  
8,2,7116.432203  
8,2,4535.250000  
8,2,2208.500000  
8,2,1539.494898  
8,2,4597.877778  
8,2,1923.193750  
8,2,2539.375000  
8,2,2224.353261  
8,2,1872.983553  
8,2,1571.849359  
8,2,12058.738839  
8,2,5039.477273  
8,2,4808.016393  
8,2,3049.919271  
8,2,6974.171569

8,2,1601.089674  
8,2,1807.590426  
8,2,5290.909574  
8,2,3840.267045  
8,2,3266.261538  
8,2,1697.977941  
8,2,4379.758454  
8,2,8371.986486  
8,2,7611.443182  
8,2,4430.204787  
8,2,2061.321429  
8,2,3788.669355  
8,2,8165.275641  
8,2,1683.318182  
8,2,1861.070755  
8,2,6222.087649  
8,2,4676.575000  
8,2,12508.250000  
8,2,6159.572674  
8,2,3156.857513  
8,2,13229.220408  
8,2,2273.657360  
8,2,4877.305085  
8,2,6173.678571  
8,2,3330.448276  
8,2,14976.287234  
8,2,3326.521739  
8,2,4261.759615  
8,2,2042.845455  
8,2,2860.922222  
8,2,1910.645833  
8,2,1503.583333  
8,2,2753.627778  
8,2,3040.024390  
8,2,3753.928571  
8,2,2398.551724  
8,2,3664.375000  
8,2,5121.968085  
8,2,1639.178571  
8,2,3068.973837  
8,2,2825.437500  
8,2,5803.111111  
8,2,6682.137019  
8,2,10292.308824  
8,2,2461.857143  
8,2,2557.820312  
8,2,3073.289063  
8,2,1629.075581  
8,2,2343.687500  
8,2,1512.676630  
8,2,3924.767442  
8,2,2454.375000  
8,2,1679.166667  
8,2,2465.280405  
8,2,8452.120690  
8,2,1746.864865  
8,2,7123.250000  
8,2,2922.022222  
8,2,2775.255814  
8,2,1669.437500  
8,2,4378.967593  
8,2,5875.625000  
8,2,2278.390625  
8,2,3358.511905  
8,2,5410.336538  
8,2,6822.780488

8,2,2201.598039  
8,2,1932.000000  
8,2,8150.476562  
8,2,6369.214286  
8,2,4560.041667  
8,2,7644.438725  
8,2,5744.910448  
8,2,1900.980263  
8,2,3161.232558  
8,2,2256.465116  
8,2,3950.850962  
8,2,3869.125000  
8,2,2751.967949  
8,2,4114.800000  
8,2,6245.567308  
8,2,9095.240625  
8,2,6280.235294  
8,2,6181.490741  
8,2,8675.804124  
8,2,9042.391566  
8,2,3690.945000  
8,2,1834.265000  
8,2,4856.941176  
8,2,2000.102041  
8,2,2823.312500  
8,2,3535.579545  
8,2,2579.636905  
8,2,2559.027027  
8,2,5878.473404  
8,2,5833.762500  
8,2,2930.467105  
8,2,3075.291667  
8,2,3632.000000  
8,2,2374.911932  
8,2,2121.527778  
8,2,3251.868421  
8,2,12450.291667  
8,2,2013.588710  
8,2,2426.766892  
8,2,16704.888889  
8,2,3401.507212  
8,2,2785.832589  
8,2,6658.902778  
8,2,11958.581019  
8,2,3663.134615  
8,2,2397.470588  
8,2,1675.583333  
8,2,2305.319372  
8,2,3457.219512  
8,2,2981.059524  
8,2,2480.146341  
8,2,5806.461735  
8,2,3509.687500  
8,2,2362.152439  
8,2,1651.278125  
8,2,1854.574519  
8,2,4699.250000  
8,2,4802.500000  
8,2,2999.465116  
8,2,17533.795673  
8,2,7228.500000  
8,2,2308.580000  
8,2,3530.035000  
8,2,3010.477564  
8,2,3320.337662  
8,2,7601.520349

8,2,2583.175532  
8,2,3305.937500  
8,2,1766.789216  
8,2,2277.500000  
8,2,4192.875000  
8,2,2255.570652  
8,2,2355.728774  
8,2,3455.181818  
8,2,4890.112069  
8,2,9629.756757  
8,2,2164.961538  
8,2,2263.750000  
8,2,8321.625000  
8,2,3460.416667  
8,2,5304.210526  
8,2,3340.673469  
8,2,4750.696078  
8,2,4339.732143  
8,2,1676.448864  
8,2,12462.103814  
8,2,3743.317568  
8,2,2260.816667  
8,2,1627.815508  
8,2,5095.339286  
8,2,2467.743590  
8,2,7202.439024  
8,2,5698.066845  
8,2,4751.937173  
8,2,5230.502404  
8,2,9348.937500  
8,2,2496.500000  
8,2,6187.611111  
8,2,7827.011628  
8,2,2248.630435  
8,2,2331.424419  
8,2,1611.243094  
8,2,2941.222222  
8,2,5469.111111  
8,2,4672.421429  
8,2,3395.900000  
8,2,1910.268229  
8,2,3276.666667  
8,2,2426.691489  
8,2,3841.827586  
8,2,3532.166667  
8,2,1613.850000  
8,2,2111.835526  
8,2,3439.687500  
8,2,3847.569697  
8,2,1841.525000  
8,2,3419.755435  
8,2,1639.115385  
8,2,5743.718750  
8,2,6590.009091  
8,2,4412.962500  
8,2,2387.915000  
8,2,3742.255319  
8,2,2938.658163  
8,2,1546.955357  
8,2,6740.789474  
8,2,2980.512821  
8,2,2604.125000  
8,2,4232.585635  
8,2,3432.447368  
8,2,2803.290761  
8,2,2670.453125

8,2,3859.000000  
8,2,2251.528409  
8,2,1798.074074  
8,2,3851.716981  
8,2,1800.040698  
8,2,2994.968750  
8,2,1781.260000  
8,2,2306.951923  
8,2,3519.184896  
8,2,3100.260204  
8,2,7538.744681  
8,2,1639.080000  
8,2,5401.632500  
8,2,2761.261628  
8,2,3681.452778  
8,2,10378.095930  
8,2,3148.335106  
8,2,1738.327869  
8,2,2144.037162  
8,2,2829.528090  
8,2,2276.365385  
8,2,2710.088710  
8,2,7678.187500  
8,2,2013.275362  
8,2,1925.000000  
8,2,15500.564103  
8,2,7317.250000  
8,2,2882.546875  
8,2,1750.178571  
8,2,2702.187500  
8,2,3089.852941  
8,2,3125.250000  
8,2,1766.430851  
8,2,3350.104651  
8,2,2894.692308  
8,2,2684.888587  
8,2,4281.659574  
8,2,1734.887500  
8,2,3192.071429  
8,2,2205.083333  
8,2,2773.122222  
8,2,2416.481132  
8,2,1667.794872  
8,2,4685.750000  
8,2,1930.643750  
8,2,2354.627976  
8,2,2797.682692  
8,2,1594.542969  
8,2,2177.250000  
8,2,1822.600000  
8,2,1796.375000  
8,2,7697.535377  
8,2,2595.530405  
8,2,24373.541667  
8,2,5189.785714  
8,2,1707.553191  
8,2,8493.325000  
8,2,7575.301020  
8,2,5550.593750  
8,2,3210.727273  
8,2,3885.300000  
8,2,3107.696429  
8,2,4206.695122  
8,2,1555.119565  
8,2,3345.401163  
8,2,2409.541667

8,2,5850.702128  
8,2,3916.062500  
8,2,2312.542553  
8,2,4126.725610  
8,2,1673.150000  
8,2,6246.217105  
8,2,1523.139535  
8,2,2154.515306  
8,2,5097.736842  
8,2,8947.755814  
8,2,1847.142857  
8,2,2694.607955  
8,2,2175.585227  
8,2,11180.756250  
8,2,2572.684211  
8,2,6247.931373  
8,2,1720.127660  
8,2,6097.121622  
8,2,10182.613208  
8,2,2441.200000  
8,2,1670.905660  
8,2,5932.925000  
8,2,23141.431818  
8,2,3085.250000  
8,2,4276.324468  
8,2,3645.145833  
8,2,3471.188830  
8,2,1745.395349  
8,2,1635.875000  
8,2,4034.115385  
8,2,24607.720000  
8,2,11410.622500  
8,2,2218.664286  
8,2,8548.230769  
8,2,2694.125000  
8,2,2217.250000  
8,2,10298.079082  
8,2,2888.282051  
8,2,2007.045455  
8,2,11909.293919  
8,2,1807.187097  
8,2,1530.950000  
8,2,6263.252907  
8,2,1730.682692  
8,2,1959.608108  
8,2,2455.742038  
8,2,4680.450000  
8,2,3921.625000  
8,2,5432.600000  
8,2,3940.800000  
8,2,9696.043478  
8,2,3644.817308  
8,2,2014.250000  
8,2,3485.368304  
8,2,9132.010417  
8,2,1553.482759  
8,2,4670.588068  
8,2,6604.132353  
8,2,2651.333333  
8,2,5302.581818  
8,2,2756.829268  
8,2,3917.183962  
8,2,4533.585106  
8,2,2905.318750  
8,2,1942.666667  
8,2,4755.265306

8,2,8824.389881  
8,2,2300.482143  
8,2,12640.055288  
8,2,3177.785256  
8,2,2518.430921  
8,2,2216.827500  
8,2,10508.776786  
8,2,5042.493750  
8,2,3034.059524  
8,2,1776.422297  
8,2,5884.425926  
8,2,1797.744792  
8,2,5259.361702  
8,2,4220.089674  
8,2,1700.134615  
8,2,8069.883152  
8,2,7311.152273  
8,2,2057.524306  
8,2,7136.247093  
8,2,10241.019737  
8,2,2278.779412  
8,2,4592.062500  
8,2,3229.845238  
8,2,3895.678571  
8,2,2957.820755  
8,2,6825.783784  
8,2,2987.791667  
8,2,3962.266667  
8,2,5155.531915  
8,2,1678.091837  
8,2,8032.072034  
8,2,3461.444444  
8,2,2051.814815  
8,2,4107.600000  
8,2,1517.792857  
8,2,5448.312500  
8,2,3160.932927  
8,2,2377.463542  
8,2,3087.884615  
8,2,2349.066667  
8,2,1826.641447  
8,2,3676.742857  
8,2,5211.868243  
8,2,3760.083333  
8,2,13800.267857  
8,2,2211.238095  
8,2,2290.125000  
8,2,5552.640625  
8,2,5457.308824  
8,2,1917.963816  
9,1,2603.482639  
9,1,3743.250000  
9,1,2960.804878  
9,1,34206.356061  
9,1,11085.859756  
9,1,5672.583333  
9,1,2168.487179  
9,1,2903.500000  
9,1,1991.889535  
9,1,2109.463415  
9,1,140363.631579  
9,1,1501.935606  
9,1,2506.250000  
9,1,64270.270833  
9,1,1824.694444  
9,1,1665.950000

9,1,2219.113636  
9,1,7105.625000  
9,1,42934.378049  
9,1,1542.761364  
9,1,2741.040441  
9,1,4994.625000  
9,1,1984.622222  
9,1,4189.375000  
9,1,8358.034722  
9,1,60410.805556  
9,1,1555.816176  
9,1,1727.051471  
9,1,2457.958333  
9,1,1582.494048  
9,1,2666.225806  
9,1,55495.213542  
9,1,1523.977273  
9,1,7493.502660  
9,1,3732.614865  
9,1,1501.297872  
9,1,17875.004902  
9,1,1646.507143  
9,1,2600.569149  
9,1,1503.938776  
9,1,2549.757576  
9,1,2517.630682  
9,1,2690.007576  
9,1,1608.897436  
9,1,105054.093023  
9,1,1592.625000  
9,1,1731.087500  
9,1,1550.600000  
9,1,4970.507812  
9,1,1909.302326  
9,1,22944.285714  
9,1,66448.707317  
9,1,29383.385417  
9,1,26876.617424  
9,1,2401.047619  
9,1,1603.128378  
9,1,61873.076923  
9,1,64875.351744  
9,1,1712.854167  
9,1,39867.517857  
9,1,52148.117925  
9,1,78413.058511  
9,1,55442.888889  
9,1,19593.146341  
9,1,1908.062500  
9,1,3577.597561  
9,1,1778.522436  
9,1,6637.191667  
9,1,32880.015625  
9,1,1997.407051  
9,1,7142.377907  
9,1,77711.937500  
9,1,9156.090909  
9,1,1897.300000  
9,1,1800.963235  
9,1,1544.334375  
9,1,113331.341463  
9,1,3355.937500  
9,1,44157.227941  
9,1,3731.735465  
9,1,1631.843750  
9,1,8574.917969

9,1,92056.250000  
9,1,2864.830000  
9,1,3667.591837  
9,1,2692.042857  
9,1,7220.012195  
9,1,15191.166667  
9,1,2713.383929  
9,1,1747.366279  
9,1,38560.110294  
9,1,43473.239865  
9,1,3948.036765  
9,1,2084.312500  
9,1,4480.515625  
9,1,1756.428571  
9,1,21809.775641  
9,1,7771.921053  
9,1,1910.192308  
9,1,2286.696429  
9,1,2066.517045  
9,1,24218.318966  
9,1,100652.400000  
9,1,2033.188889  
9,1,3662.153846  
9,1,2027.585366  
9,1,2390.406250  
9,1,5216.715116  
9,1,24998.750000  
9,1,51665.212121  
9,1,16545.246875  
9,1,101986.155488  
9,1,1701.732143  
9,1,1710.321429  
9,1,3544.200581  
9,1,5447.900000  
9,1,4522.800000  
9,1,1845.156977  
9,1,2945.669643  
9,1,5170.295000  
9,1,2007.304348  
9,1,60306.065789  
9,1,43862.500000  
9,1,2354.111413  
9,1,1585.052326  
9,1,7393.332317  
9,1,2245.361111  
9,1,2284.505814  
9,1,1714.719512  
9,1,2760.521341  
9,1,21969.477273  
9,1,77420.685811  
9,1,4414.656977  
9,1,17727.639286  
9,1,8737.912162  
9,1,2860.021739  
9,1,1977.278846  
9,1,12922.750000  
9,1,2901.622222  
9,1,32379.531250  
9,1,60659.182692  
9,1,4573.860465  
9,1,3142.307292  
9,1,2298.510417  
9,1,1537.544643  
9,1,11332.153846  
9,1,2759.181818  
9,1,11598.977273

9,1,2514.779070  
9,1,4075.371795  
9,1,2789.258523  
9,1,22049.198052  
9,1,4416.494186  
9,1,6289.774038  
9,1,2679.817308  
9,1,1969.785714  
9,1,1976.242188  
9,1,5065.093750  
9,1,4339.750000  
9,1,46498.923387  
9,1,2702.039062  
9,1,7558.737500  
9,1,6734.423780  
9,1,2143.456395  
9,1,2513.860795  
9,1,7821.307692  
9,1,9140.507653  
9,1,4411.454545  
9,1,1901.598837  
9,1,16911.628571  
9,1,2252.568750  
9,1,3680.686047  
9,1,4197.487805  
9,1,1630.218750  
9,1,4199.278646  
9,1,4972.500000  
9,1,3091.277027  
9,1,1817.528846  
9,1,1886.000000  
9,1,66579.036184  
9,1,5830.333333  
9,1,25751.391892  
9,1,41016.083333  
9,1,9666.056548  
9,1,12268.500000  
9,1,1499.451220  
9,1,1653.687500  
9,1,5992.750000  
9,1,2958.542763  
9,1,18989.757353  
9,1,7661.862500  
9,1,28411.342857  
9,1,1873.000000  
9,1,85705.939024  
9,1,2286.065476  
9,1,1591.621951  
9,1,9795.450000  
9,1,5894.680556  
9,1,1579.311111  
9,1,1521.457317  
9,1,1613.946809  
9,1,14465.800000  
9,1,1572.000000  
9,1,4140.747222  
9,1,2446.300000  
9,1,1640.585366  
9,1,1766.262097  
9,1,6588.775000  
9,1,1944.197917  
9,1,71040.355769  
9,1,8517.309524  
9,1,1684.645833  
9,1,36763.275000  
9,1,1617.143750

9,1,1789.834239  
9,1,40721.227778  
9,1,1863.076923  
9,1,183481.161765  
9,1,4077.264706  
9,1,3455.072222  
9,1,2721.917614  
9,1,9210.400000  
9,1,2273.204861  
9,1,8181.764535  
9,1,19681.109375  
9,1,1573.702128  
9,1,1652.500000  
9,1,3723.765152  
9,1,70650.022059  
9,1,1659.511111  
9,1,1568.524390  
9,1,64580.385000  
9,1,1895.238636  
9,1,12203.331658  
9,1,1913.726974  
9,1,119325.551136  
9,1,8117.772727  
9,1,2501.727273  
9,1,4437.523438  
9,1,6765.514535  
9,1,11225.736842  
9,1,33392.607143  
9,1,2620.380682  
9,1,15134.450000  
9,1,2362.088542  
9,1,46397.137500  
9,1,3187.764535  
9,1,3301.293750  
9,1,1786.934783  
9,1,31641.018750  
9,1,1781.829268  
9,1,2699.883721  
9,1,1521.997222  
9,1,1546.500000  
9,1,2452.947917  
9,1,5079.697500  
9,1,5026.897727  
9,1,1806.801136  
9,1,30301.934211  
9,1,1827.403846  
9,1,53092.334677  
9,1,1950.331126  
9,1,2604.702128  
9,1,78803.753049  
9,1,1645.891304  
9,1,10200.773936  
9,1,2044.208333  
9,1,1530.891667  
9,1,1631.443182  
9,1,2434.935897  
9,1,40808.250000  
9,1,1641.304348  
9,1,1789.609756  
9,1,100334.432927  
9,1,2865.625000  
9,1,24812.657051  
9,1,2384.926829  
9,1,9774.140625  
9,1,1602.847826  
9,1,3079.367021

9,1,42062.972973  
9,1,5504.015625  
9,1,2387.385870  
9,1,31625.518750  
9,1,31958.804054  
9,1,2881.639706  
9,1,3196.391026  
9,1,2461.471429  
9,1,4880.486111  
9,1,5361.721429  
9,1,1928.932292  
9,1,43717.214674  
9,1,2075.815476  
9,1,2148.869565  
9,1,3109.228873  
9,1,2910.790541  
9,1,1935.457447  
9,1,2043.038690  
9,1,2551.198529  
9,1,2005.901515  
9,1,4234.583333  
9,1,99196.013514  
9,1,2655.815476  
9,1,2227.023256  
9,1,2264.112500  
9,1,2562.500000  
9,1,1588.027778  
9,1,8081.429688  
9,1,37178.693878  
9,1,1735.175000  
9,1,2501.024390  
9,1,4122.804878  
9,1,2115.155405  
9,1,1867.835106  
9,1,1803.940104  
9,1,64834.769231  
9,1,2977.133333  
9,1,54222.157051  
9,1,4373.814815  
9,1,8537.524390  
9,1,4872.560811  
9,1,1925.179487  
9,1,2502.775862  
9,1,117823.013158  
9,1,4490.459302  
9,1,63058.253676  
9,1,2700.662791  
9,1,3662.091837  
9,1,116539.281250  
9,1,1711.500000  
9,1,1653.090909  
9,1,2113.908537  
9,1,24719.600000  
9,1,2406.282738  
9,1,1812.343023  
9,1,13519.027174  
9,1,2091.231618  
9,1,30688.142857  
9,1,2685.845238  
9,1,2302.500000  
9,1,1668.127660  
9,1,27767.012195  
9,1,2170.250000  
9,1,122530.150000  
9,1,7033.260417  
9,1,4234.094340

9,1,4585.240000  
9,1,6210.428571  
9,1,1967.184524  
9,1,139235.961538  
9,1,117822.256098  
9,1,1937.922619  
9,1,1872.194079  
9,1,3132.300000  
9,1,51032.500000  
9,1,3285.857143  
9,1,1801.275000  
9,1,2629.486486  
9,1,35166.250000  
9,1,2189.130952  
9,1,4446.000000  
9,1,5002.991667  
9,1,10765.654255  
9,1,1531.000000  
9,1,2736.548295  
9,1,9254.709677  
9,1,56221.599359  
9,1,72250.779070  
9,1,3147.649306  
9,1,2592.979730  
9,1,75442.097561  
9,1,24074.902174  
9,1,59573.960526  
9,1,1826.776316  
9,1,31239.000000  
9,1,3500.198113  
9,1,183538.500000  
9,1,2598.756098  
9,1,1618.488636  
9,1,80555.082386  
9,1,1912.490132  
9,1,3678.030000  
9,1,75338.187500  
9,1,7268.872159  
9,1,81559.833333  
9,1,2648.486413  
9,1,2015.851744  
9,1,22479.652174  
9,1,1739.785714  
9,1,1882.227273  
9,1,4528.828125  
9,1,10222.139205  
9,1,6482.319444  
9,1,33418.996212  
9,1,3046.200000  
9,1,3106.325581  
9,1,25638.807692  
9,1,5558.861842  
9,1,19311.636364  
9,1,1551.407051  
9,1,2379.900000  
9,1,8488.042857  
9,1,2111.666667  
9,1,1716.250000  
9,1,2514.224138  
9,1,1806.314024  
9,1,3503.920732  
9,1,3793.781915  
9,1,3180.471698  
9,1,4166.875000  
9,1,3169.711111  
9,1,2715.572222

9,1,3261.676630  
9,1,1734.175000  
9,1,21229.161458  
9,1,1894.125000  
9,1,24958.361842  
9,1,8779.043478  
9,1,2657.799419  
9,1,2428.115132  
9,1,47362.006250  
9,1,91506.250000  
9,1,75025.875000  
9,1,11735.140625  
9,1,8898.268293  
9,1,2300.327381  
9,1,5465.867647  
9,1,38469.976744  
9,1,35329.000000  
9,1,30322.041667  
9,1,5834.666667  
9,1,3120.775000  
9,1,43867.000000  
9,1,1956.901596  
9,1,2570.109375  
9,1,32782.043605  
9,1,128838.344907  
9,1,1879.557927  
9,1,47641.807692  
9,1,2946.023256  
9,1,1552.360465  
9,1,6795.625000  
9,1,3728.750000  
9,1,35538.526316  
9,1,6235.300000  
9,1,69714.847973  
9,1,2078.767857  
9,1,11162.258152  
9,1,1963.762195  
9,1,1596.654070  
9,1,6805.526163  
9,1,3963.330645  
9,1,135504.759146  
9,1,1532.649306  
9,1,2084.622024  
9,1,3126.201087  
9,1,1749.058140  
9,1,13608.771429  
9,1,2114.804348  
9,1,1643.241477  
9,1,1673.721154  
9,1,2513.056250  
9,1,1712.461538  
9,1,36805.830882  
9,1,2269.506579  
9,1,2886.488889  
9,1,1567.865385  
9,1,1551.792857  
9,1,63751.962838  
9,1,58283.625000  
9,1,1708.000000  
9,1,1743.425000  
9,1,2616.192568  
9,1,48806.265625  
9,1,3735.154255  
9,1,20793.250000  
9,1,13920.140909  
9,1,28154.453947

9,1,2257.733333  
9,1,3468.901163  
9,1,4065.975610  
9,1,1575.119318  
9,1,2309.493421  
9,1,2247.101064  
9,1,35003.878049  
9,1,2756.236702  
9,1,1925.131944  
9,1,50077.122340  
9,1,9087.473684  
9,1,2897.352941  
9,1,2823.088235  
9,1,1899.928571  
9,1,53649.769531  
9,1,1506.964286  
9,1,8358.510870  
9,1,4749.662946  
9,1,54255.125000  
9,1,18113.636111  
9,1,31825.965517  
9,1,1880.971154  
9,1,1720.377551  
9,1,45591.986111  
9,1,2638.717391  
9,1,1923.722826  
9,1,69392.305556  
9,1,2031.104651  
9,1,1562.678977  
9,1,3503.211735  
9,1,1567.250000  
9,1,9729.914062  
9,1,21636.523810  
9,1,3022.346429  
9,1,2668.128205  
9,1,4354.173913  
9,1,28796.161585  
9,1,1650.170213  
9,1,58304.019531  
9,1,5812.703125  
9,1,62926.204268  
9,1,46882.486111  
9,1,2403.198113  
9,1,51764.907895  
9,1,17089.182927  
9,1,36137.278571  
9,1,1742.321429  
9,1,10070.120098  
9,1,4550.331731  
9,1,2368.330000  
9,1,7073.803571  
9,1,1981.806548  
9,1,40494.138889  
9,1,2127.116279  
9,1,2421.484375  
9,1,2086.223404  
9,1,1558.907895  
9,1,2224.469512  
9,1,3226.895833  
9,1,2272.534375  
9,1,36568.960526  
9,1,1927.736486  
9,1,39820.709677  
9,1,4090.298077  
9,1,1954.740741  
9,1,2418.900000

9,1,3732.907143  
9,1,29735.679293  
9,1,120150.951220  
9,1,2509.841216  
9,1,2690.398649  
9,1,11011.180000  
9,1,2329.288690  
9,1,1858.000000  
9,1,2298.021341  
9,1,9667.871622  
9,1,70828.186047  
9,1,2708.096154  
9,1,24933.548077  
9,1,1784.508929  
9,1,2944.808140  
9,1,86606.489865  
9,1,8749.596774  
9,1,1516.959302  
9,1,2932.857143  
9,1,4001.562500  
9,1,13729.448171  
9,1,2062.483333  
9,1,40125.375000  
9,1,80234.295732  
9,1,4909.176471  
9,1,42933.888158  
9,1,39647.042553  
9,1,5739.888889  
9,1,3476.285714  
9,1,1608.883721  
9,1,1735.038462  
9,1,2556.540541  
9,1,1667.541667  
9,1,1542.017857  
9,1,63289.666667  
9,1,57018.345395  
9,1,3381.316176  
9,1,9936.285156  
9,1,38316.803125  
9,1,2056.119048  
9,1,2104.423077  
9,1,1636.908854  
9,1,8255.085106  
9,1,1567.885714  
9,1,5569.244681  
9,1,2969.959184  
9,1,1707.062500  
9,1,29927.235795  
9,1,28982.712963  
9,1,8273.757576  
9,1,2056.062500  
9,1,3168.235294  
9,1,1516.172297  
9,1,45015.884615  
9,1,1764.168750  
9,1,39664.858108  
9,1,1729.850000  
9,1,2092.405000  
9,1,4938.260776  
9,1,1585.276316  
9,1,5462.987500  
9,1,2311.505000  
9,1,1958.914634  
9,1,111225.847826  
9,1,2019.757576  
9,1,4590.904762

9,1,1638.581633  
9,1,2608.203804  
9,1,4384.839286  
9,1,1916.489796  
9,1,39036.607143  
9,1,3321.232143  
9,1,20155.442073  
9,1,2350.812500  
9,1,3751.011905  
9,1,39477.954545  
9,1,2993.312500  
9,1,10093.460938  
9,1,23683.525000  
9,1,4438.236111  
9,1,2060.485294  
9,1,34096.287500  
9,1,1778.800595  
9,1,24932.659091  
9,1,17979.000000  
9,1,3589.209559  
9,1,4490.769737  
9,1,61577.079545  
9,1,26486.562500  
9,1,1642.250000  
9,1,2751.424342  
9,1,4156.784884  
9,1,118345.696970  
9,1,1535.715686  
9,1,2416.089286  
9,1,9779.487069  
9,1,71791.500000  
9,1,2074.304348  
9,1,8501.625000  
9,1,1585.297872  
9,1,2726.725000  
9,1,2458.500000  
9,1,3059.865854  
9,1,2330.228261  
9,1,9108.577381  
9,1,1671.906977  
9,1,2863.264706  
9,1,2200.061170  
9,1,155711.907500  
9,1,6261.837500  
9,1,5394.162500  
9,1,1502.263158  
9,1,41840.050000  
9,1,8787.229167  
9,1,1509.500000  
9,1,2895.267857  
9,1,1671.048780  
9,1,1596.763514  
9,1,3131.926829  
9,1,3644.380102  
9,1,6677.857143  
9,1,2500.435811  
9,1,7403.612245  
9,1,2900.234043  
9,1,102866.772059  
9,1,84660.826087  
9,1,16452.930556  
9,1,3557.202703  
9,1,2826.187500  
9,1,3770.424342  
9,1,58467.043605  
9,1,45300.450000

9,1,1872.095238  
9,1,1871.701923  
9,1,3408.973684  
9,1,2336.227273  
9,1,1580.543750  
9,1,5570.004808  
9,1,4379.260870  
9,1,38520.118590  
9,1,82954.562500  
9,1,5782.392157  
9,1,3853.575000  
9,1,1803.891304  
9,1,3019.589744  
9,1,4152.643750  
9,1,23622.076923  
9,1,1811.325000  
9,1,11793.413793  
9,1,4452.118590  
9,1,3735.885714  
9,1,1760.600000  
9,1,47231.845000  
9,1,7880.343750  
9,1,1867.420732  
9,1,1953.562500  
9,1,5358.550000  
9,1,35988.638158  
9,1,38227.827206  
9,1,16896.954861  
9,1,23850.484848  
9,1,2674.963889  
9,1,2917.286458  
9,1,1548.850000  
9,1,2591.237179  
9,1,20330.422222  
9,1,15598.692708  
9,1,2295.558824  
9,1,61500.281250  
9,1,1511.287500  
9,1,2354.566489  
9,1,1900.681818  
9,1,1660.768293  
9,1,17540.031915  
9,1,62871.358974  
9,1,33821.152027  
9,1,1948.166667  
9,1,3145.652778  
9,1,44780.795455  
9,1,1613.796875  
9,1,1886.310811  
9,1,3086.943182  
9,1,2006.297872  
9,1,1840.845395  
9,1,1838.404255  
9,1,12053.780488  
9,1,40857.183673  
9,1,1692.085366  
9,1,1526.764706  
9,1,2646.858974  
9,1,1530.026042  
9,1,1950.415541  
9,1,2802.647436  
9,1,2621.833333  
9,1,3525.125000  
9,1,12463.739130  
9,1,1863.255682  
9,1,37438.208333

9,1,1694.650000  
9,1,1767.622396  
9,1,4143.621951  
9,1,1518.387755  
9,1,1815.263298  
9,1,1705.132979  
9,1,4678.084906  
9,1,70310.956250  
9,1,3459.802632  
9,1,1926.884615  
9,1,1814.513158  
9,1,1641.050676  
9,1,106978.230769  
9,1,1884.436111  
9,1,2513.386628  
9,1,1578.769737  
9,1,89317.604167  
9,1,3554.736413  
9,1,12150.364583  
9,1,110605.611111  
9,1,37639.384146  
9,1,48628.812500  
9,1,1583.963636  
9,1,2011.820122  
9,1,2053.828125  
9,1,6535.816860  
9,1,3305.445122  
9,1,1519.993902  
9,1,8807.708333  
9,1,21636.968750  
9,1,1554.422619  
9,1,3116.500000  
9,1,8970.133929  
9,1,2167.144737  
9,1,2620.583333  
9,1,3812.006250  
9,1,2619.660714  
9,1,50436.590909  
9,1,2985.402778  
9,1,3674.589744  
9,1,8791.939024  
9,1,85551.554054  
9,1,1851.212766  
9,1,6389.083333  
9,1,1936.765244  
9,1,1625.465625  
9,1,75500.956250  
9,1,4040.156250  
9,1,1557.136364  
9,1,14749.483333  
9,1,6546.220745  
9,1,3030.262195  
9,1,2254.458333  
9,1,4178.875000  
9,1,4836.036765  
9,1,1610.860294  
9,1,1815.529412  
9,1,2259.723404  
9,1,11214.977273  
9,1,17236.204082  
9,1,26002.500000  
9,1,90014.000000  
9,1,32012.549020  
9,1,1787.641304  
9,1,7636.839286  
9,1,1692.316667

9,1,5706.843750  
9,1,27836.587500  
9,1,59337.758621  
9,1,55909.176829  
9,1,9407.612903  
9,1,3202.625000  
9,1,17183.644231  
9,1,2764.922619  
9,1,1715.817708  
9,1,1504.208333  
9,1,32881.120192  
9,1,1978.753676  
9,1,2591.585526  
9,1,1878.291667  
9,1,5829.500000  
9,1,3133.448370  
9,1,3460.428571  
9,1,3508.944444  
9,1,6014.538462  
9,1,1603.225610  
9,1,1832.887500  
9,1,3965.609375  
9,1,55791.659091  
9,1,4665.404255  
9,1,2796.325581  
9,1,3282.390244  
9,1,1503.205357  
9,1,3185.642857  
9,1,2277.439189  
9,1,136916.824468  
9,1,73955.822857  
9,1,6990.284722  
9,1,1707.743902  
9,1,3110.250000  
9,1,55832.780488  
9,1,2972.708333  
9,1,1651.744565  
9,1,1673.045455  
9,1,133962.571023  
9,1,4045.201923  
9,1,88467.661765  
9,1,42623.964744  
9,1,5682.821429  
9,1,1895.741935  
9,1,16287.088235  
9,1,47913.843750  
9,1,6372.444444  
9,1,8516.684783  
9,1,3279.834302  
9,1,1938.739286  
9,1,172250.633333  
9,1,69146.292683  
9,1,61552.567568  
9,1,64088.319079  
9,1,1565.777778  
9,1,36257.973837  
9,1,85089.065625  
9,1,4645.050000  
9,1,46650.819444  
9,1,35394.516026  
9,1,20597.897959  
9,1,1984.690476  
9,1,6394.786184  
9,1,1501.692308  
9,1,4545.872340  
9,1,1521.687500

9,1,2440.828125  
9,1,5167.932065  
9,1,5967.963710  
9,1,1648.428571  
9,1,47051.625000  
9,1,2955.326923  
9,1,3947.450581  
9,1,2972.995000  
9,1,1602.416667  
9,1,3205.732558  
9,1,69576.937500  
9,1,2005.228571  
9,1,58226.752907  
9,1,2815.000000  
9,1,4041.246951  
9,1,3230.194853  
9,1,2541.200000  
9,1,9896.493421  
9,1,18075.812500  
9,1,2657.538462  
9,1,56803.780405  
9,1,7288.608696  
9,1,29615.302419  
9,1,8603.400000  
9,1,25167.868421  
9,1,3131.500000  
9,1,1552.839744  
9,1,53056.891667  
9,1,16504.218750  
9,1,2641.765625  
9,1,3072.060000  
9,1,2008.410000  
9,1,2507.782609  
9,1,49854.459559  
9,1,14273.944444  
9,1,2981.270270  
9,1,19258.375000  
9,1,2156.112903  
9,1,2324.765000  
9,1,3013.014535  
9,1,40163.846354  
9,1,4299.125000  
9,1,39778.871212  
9,1,4943.871429  
9,1,51009.890625  
9,1,11478.829268  
9,1,3031.605000  
9,1,1752.703571  
9,1,4840.723684  
9,1,5497.860465  
9,1,53077.777778  
9,1,1788.780488  
9,1,2861.413265  
9,1,22126.830000  
9,1,2018.448980  
9,1,1849.250000  
9,1,18376.328000  
9,1,3739.763975  
9,1,1667.531250  
9,1,10049.246324  
9,1,1719.500000  
9,1,2309.918129  
9,1,2319.125000  
9,1,2923.574405  
9,1,1590.138889  
9,1,3697.598404

9,1,2576.625000  
9,1,6025.285714  
9,1,13899.860465  
9,1,56238.404762  
9,1,2352.769231  
9,1,2861.777027  
9,1,2781.533537  
9,1,103629.155556  
9,1,4636.132212  
9,1,2056.472826  
9,1,3598.750000  
9,1,2671.814103  
9,1,1724.472222  
9,1,2417.600000  
9,1,16023.286290  
9,1,86826.461538  
9,1,7669.147959  
9,1,113360.062500  
9,1,1710.713415  
9,1,44033.362903  
9,1,5705.047170  
9,1,1672.901515  
9,1,2780.985465  
9,1,2208.573864  
9,1,1966.357143  
9,1,1547.171196  
9,1,1518.653125  
9,1,1703.225610  
9,1,6478.203488  
9,1,1855.328125  
9,1,4326.981132  
9,1,16440.286290  
9,1,5175.690000  
9,1,107751.166667  
9,1,3489.125000  
9,1,2633.858333  
9,1,2799.944444  
9,1,1760.237500  
9,1,3932.726190  
9,1,3801.388889  
9,1,3624.142857  
9,1,3965.968085  
9,1,2287.046875  
9,1,2827.790698  
9,1,1871.572222  
9,1,6525.975000  
9,1,5776.533088  
9,1,43028.475000  
9,1,1885.192568  
9,1,25238.983871  
9,1,1634.130208  
9,1,3407.243243  
9,1,155221.122093  
9,1,5081.655556  
9,1,6964.573864  
9,1,2236.265625  
9,1,1551.665541  
9,1,3833.549020  
9,1,7485.196809  
9,1,71037.810811  
9,1,1573.351064  
9,1,1936.358696  
9,1,3064.182927  
9,1,50507.791667  
9,1,1607.200521  
9,1,4330.830882

9,1,2292.388889  
9,1,3829.666667  
9,1,1791.408333  
9,1,7578.535714  
9,1,51742.005814  
9,1,7076.214286  
9,1,1981.371094  
9,1,30580.516129  
9,1,2685.444444  
9,1,3684.923913  
9,1,3053.360849  
9,1,1865.937500  
9,1,1882.011628  
9,1,1673.125000  
9,1,10204.378049  
9,1,6514.097222  
9,1,2605.319767  
9,1,7240.627660  
9,1,84902.177083  
9,1,1605.500000  
9,1,7106.822222  
9,1,3202.384615  
9,1,6868.375000  
9,1,30148.828125  
9,1,36688.065789  
9,1,7509.339286  
9,1,18663.047297  
9,1,1770.641667  
9,1,5391.898256  
9,1,102160.330357  
9,1,58382.038462  
9,1,31066.371324  
9,1,4523.985577  
9,1,1517.720930  
9,1,3230.789474  
9,1,49849.179688  
9,1,12137.700000  
9,1,2556.942073  
9,1,1546.353261  
9,1,3073.252604  
9,1,1566.131579  
9,1,13046.096774  
9,1,6289.125000  
9,1,2645.268229  
9,1,7468.845930  
9,1,2470.338235  
9,1,1796.577778  
9,1,139694.151163  
9,1,3628.821429  
9,1,37455.000000  
9,1,1993.539634  
9,1,9997.169643  
9,1,47478.020833  
9,1,16899.772959  
9,1,1669.500000  
9,1,1522.412791  
9,1,140252.350000  
9,1,2543.541667  
9,1,2280.315789  
9,1,1897.198864  
9,1,3894.083333  
9,1,3621.437500  
9,1,9433.388889  
9,1,33240.650000  
9,1,4708.720238  
9,1,2521.585938

9,1,52354.875000  
9,1,38580.926136  
9,1,61157.795139  
9,1,2546.089286  
9,1,4135.461957  
9,1,81936.826531  
9,1,3589.534884  
9,1,93275.692308  
9,1,4156.191489  
9,1,11717.195122  
9,1,1989.262500  
9,1,1579.384615  
9,1,1838.306818  
9,1,4713.869792  
9,1,1832.000000  
9,1,34295.293919  
9,1,3280.480769  
9,1,1737.836735  
9,1,10507.976562  
9,1,1705.538462  
9,1,56563.000000  
9,1,11888.909091  
9,1,3674.875000  
9,1,6670.394737  
9,1,1593.604651  
9,1,3905.443182  
9,1,3261.166667  
9,1,1507.824468  
9,1,8632.582317  
9,1,2514.391447  
9,1,2141.698718  
9,1,18144.131944  
9,1,6519.666667  
9,1,32840.825658  
9,1,2218.274390  
9,1,2689.280488  
9,1,5429.428571  
9,1,69069.833333  
9,1,3606.363095  
9,1,85413.930921  
9,1,9751.437500  
9,1,29478.567073  
9,1,2031.000000  
9,1,1790.125000  
9,1,4245.983696  
9,1,4179.350000  
9,1,2226.565341  
9,1,32052.846154  
9,1,3380.910714  
9,1,4022.904762  
9,1,2405.550000  
9,1,2390.848214  
9,1,1992.128049  
9,1,11733.613372  
9,1,150415.300000  
9,1,1804.625000  
9,1,1647.022222  
9,1,45981.252874  
9,1,3245.730769  
9,1,22388.525568  
9,1,3826.377451  
9,1,3365.087209  
9,1,1528.152778  
9,1,6229.212766  
9,1,1769.082447  
9,1,178839.295000

9,1,3440.746622  
9,1,4312.737805  
9,1,2616.000000  
9,1,1937.818182  
9,1,1643.456395  
9,1,3820.979651  
9,1,2128.666667  
9,1,43343.800000  
9,1,2136.832237  
9,1,5517.486486  
9,1,2153.574468  
9,1,2801.324468  
9,1,7239.693878  
9,1,3987.112805  
9,1,9855.200000  
9,1,75247.550000  
9,1,1535.189286  
9,1,2011.926471  
9,1,1841.024306  
9,1,2871.662234  
9,1,4425.000000  
9,1,47330.322368  
9,1,104190.802083  
9,1,75243.003289  
9,1,34602.421875  
9,1,4701.963415  
9,1,3754.272436  
9,1,3984.440476  
9,1,4126.250000  
9,1,1529.847222  
9,1,4071.822222  
9,1,3183.500000  
9,1,2656.369863  
9,1,8415.237500  
9,1,5102.911765  
9,1,4458.820122  
9,1,159554.253125  
9,1,1547.019444  
9,1,3844.795918  
9,1,71936.912791  
9,1,5379.703488  
9,1,1984.357143  
9,1,55612.596429  
9,1,56132.980263  
9,1,3367.277027  
9,1,9861.460526  
9,1,16574.265152  
9,1,2552.028846  
9,1,2606.566667  
9,1,91031.441667  
9,1,11939.390306  
9,1,116631.847826  
9,1,118278.759615  
9,1,2048.446541  
9,1,4680.764706  
9,1,3434.609756  
9,1,1818.828125  
9,1,3065.250000  
9,1,57422.009868  
9,1,2444.343750  
9,1,139043.744318  
9,1,17127.988636  
9,1,6558.821429  
9,1,1736.011628  
9,1,41779.447368  
9,1,6192.302326

9,1,2214.073171  
9,1,5020.100000  
9,1,13766.641304  
9,1,57235.392405  
9,1,3714.600610  
9,1,3899.890244  
9,1,73115.562500  
9,1,1688.682292  
9,1,2136.359848  
9,1,3023.741071  
9,1,2099.668605  
9,1,12346.306818  
9,1,3357.956250  
9,1,7892.587500  
9,1,2649.600000  
9,1,3742.833333  
9,1,3438.700000  
9,1,107437.885870  
9,1,2527.136364  
9,1,177018.348039  
9,1,148008.476190  
9,1,42388.250000  
9,1,21161.181818  
9,1,5787.750000  
9,1,2420.713415  
9,1,2306.967949  
9,1,3625.110465  
9,1,73756.833333  
9,1,3190.541667  
9,1,1590.627604  
9,1,3706.447674  
9,1,2976.125000  
9,1,1682.975610  
9,1,2848.300000  
9,1,3604.023810  
9,1,7156.723039  
9,1,1987.420455  
9,1,83854.692308  
9,1,4216.625000  
9,1,1876.523148  
9,1,4262.621951  
9,1,2534.140625  
9,1,3466.806818  
9,1,61469.681818  
9,1,2817.785714  
9,1,2709.946429  
9,1,3220.867347  
9,1,2188.630556  
9,1,1691.203804  
9,1,1796.815789  
9,1,2008.145455  
9,1,1845.021875  
9,1,33883.636111  
9,1,56504.190789  
9,1,110062.461538  
9,1,4966.877660  
9,1,32756.000000  
9,1,19332.612500  
9,1,2582.554054  
9,1,1620.239796  
9,1,5945.476190  
9,1,2043.683824  
9,1,44062.719595  
9,1,1674.666667  
9,1,1910.279070  
9,1,14230.728261

9,1,57417.866279  
9,1,1704.812500  
9,1,1511.184211  
9,1,5113.353261  
9,1,2109.894737  
9,1,100172.156250  
9,1,56421.047297  
9,1,1579.497093  
9,1,1963.152406  
9,1,1765.782738  
9,1,1593.227273  
9,1,19362.125000  
9,1,138195.050000  
9,1,2103.593750  
9,1,3112.480769  
9,1,77369.972222  
9,1,1932.041667  
9,1,1999.630435  
9,1,2223.053977  
9,1,7719.864130  
9,1,6160.668367  
9,1,9681.651786  
9,1,52275.250000  
9,1,3041.785714  
9,1,1731.397059  
9,1,2410.786585  
9,1,1937.214286  
9,1,3017.211111  
9,1,2751.218750  
9,1,5519.462209  
9,1,32424.573529  
9,1,1801.647727  
9,1,58760.056250  
9,1,84884.178571  
9,1,1743.695312  
9,1,1570.302632  
9,1,1924.837209  
9,1,58474.303571  
9,1,4513.700000  
9,1,2154.989796  
9,1,2768.041667  
9,1,55605.267361  
9,1,2383.185976  
9,1,79871.418919  
9,1,26188.145833  
9,1,1644.842105  
9,1,1513.231707  
9,1,4579.665441  
9,1,2303.640000  
9,1,1560.424242  
9,1,2470.411765  
9,1,16478.875000  
9,1,72524.784574  
9,1,2867.000000  
9,1,6822.863281  
9,1,25795.371429  
9,1,1574.487805  
9,1,4127.716981  
9,1,1757.550532  
9,1,153743.319149  
9,1,2376.253289  
9,1,9054.187500  
9,1,2464.469512  
9,1,2084.545455  
9,1,70106.215909  
9,1,4697.424479

9,1,4988.782258  
9,1,2066.168919  
9,1,2304.939394  
9,1,1950.002976  
9,1,21508.333333  
9,1,18426.112500  
9,1,85589.617857  
9,1,6772.041667  
9,1,3508.456633  
9,1,1645.283784  
9,1,9813.573171  
9,1,40381.354839  
9,1,4456.533333  
9,1,53238.000000  
9,1,44845.268293  
9,1,22706.333333  
9,1,2206.090909  
9,1,2186.060811  
9,1,2376.816860  
9,1,1863.111979  
9,1,1521.903061  
9,1,16853.098404  
9,1,2539.578125  
9,1,1515.690789  
9,1,2548.782051  
9,1,1906.228365  
9,1,3076.268617  
9,1,5535.575581  
9,1,1579.567073  
9,1,49123.000000  
9,1,46763.109756  
9,1,3644.208333  
9,1,1613.684375  
9,1,66255.844444  
9,1,1671.222222  
9,1,28316.136364  
9,1,2111.880682  
9,1,2691.928571  
9,1,59339.497283  
9,1,4438.133523  
9,1,8804.201923  
9,1,1693.500000  
9,1,1607.744186  
9,1,52548.146739  
9,1,2049.388889  
9,1,2614.166667  
9,1,51610.522727  
9,1,2164.414062  
9,1,43911.586957  
9,1,69117.584559  
9,1,2230.031250  
9,1,5977.744681  
9,1,51803.054878  
9,1,4689.539474  
9,1,42958.000000  
9,1,3443.176471  
9,1,2001.103723  
9,1,1626.567308  
9,1,5617.714286  
9,1,71260.810811  
9,1,39843.392857  
9,1,1932.250000  
9,1,6552.850000  
9,1,46935.875000  
9,1,87293.290541  
9,1,3337.414773

9,1,2946.314815  
9,1,20269.216912  
9,1,103706.500000  
9,1,1921.806122  
9,1,36801.181250  
9,1,1996.409091  
9,1,1589.407051  
9,1,42399.041667  
9,1,12224.904762  
9,1,3249.366848  
9,1,4099.486842  
9,1,2268.226190  
9,1,2159.452381  
9,1,1547.389535  
9,1,1976.583333  
9,1,12602.513514  
9,1,6425.480769  
9,1,49905.976562  
9,1,54329.480769  
9,1,1683.750000  
9,1,10505.640625  
9,1,7951.042683  
9,1,2867.644737  
9,1,5316.857143  
9,1,26464.053030  
9,1,2309.207386  
9,1,6461.642857  
9,1,1785.691860  
9,1,29296.391304  
9,1,2391.628571  
9,1,66853.214286  
9,1,3359.289474  
9,1,1621.545455  
9,1,1791.298913  
9,1,7545.203947  
9,1,3665.317073  
9,1,2879.395833  
9,1,4257.411765  
9,1,14127.331395  
9,1,76454.003378  
9,1,1597.026786  
9,1,3261.345455  
9,1,6153.543478  
9,1,3974.651515  
9,1,53913.549342  
9,1,2473.184659  
9,1,2279.625000  
9,1,2443.548611  
9,1,2116.990566  
9,1,57970.551282  
9,1,87878.238636  
9,1,7872.500000  
9,1,3433.029586  
9,1,4678.086538  
9,1,11219.384868  
9,1,1631.525000  
9,1,6058.426136  
9,1,71804.672872  
9,1,24302.670455  
9,1,2848.226351  
9,1,54121.000000  
9,1,5735.485000  
9,1,6161.050781  
9,1,94752.393939  
9,1,1592.558824  
9,1,4387.700000

9,1,4052.566176  
9,1,2230.613636  
9,1,86716.802632  
9,1,16905.500000  
9,1,1790.833333  
9,1,1761.000000  
9,1,70956.250000  
9,1,2737.925000  
9,1,1791.388889  
9,1,1725.750000  
9,1,1857.428571  
9,1,10824.157609  
9,1,3234.315789  
9,1,12644.545918  
9,1,1637.300000  
9,1,2321.607143  
9,1,1611.814024  
9,1,1729.674419  
9,1,7063.193182  
9,1,6731.989796  
9,1,3048.186047  
9,1,2607.884615  
9,1,6631.616379  
9,1,4155.899390  
9,1,2355.994792  
9,1,20050.625000  
9,1,4999.288462  
9,1,2460.420455  
9,1,3789.567857  
9,1,30664.639706  
9,1,44215.953947  
9,1,46357.025735  
9,1,9610.141892  
9,1,2034.955357  
9,1,2966.137500  
9,1,1936.802326  
9,1,16220.972222  
9,1,3304.627907  
9,1,1527.470588  
9,1,64206.319767  
9,1,4954.280172  
9,1,36703.720588  
9,1,2513.363636  
9,1,3330.195000  
9,1,2172.500000  
9,1,5762.117647  
9,1,53690.052632  
9,1,32567.514706  
9,1,3166.469444  
9,1,15598.862903  
9,1,50041.222826  
9,1,26727.414634  
9,1,1785.462500  
9,1,3956.877551  
9,1,1802.224265  
9,1,3354.355978  
9,1,4679.453125  
9,1,63569.534884  
9,1,1781.000000  
9,1,3692.789634  
9,1,4813.714286  
9,1,7237.100000  
9,1,121419.277344  
9,1,1858.693182  
9,1,1627.364796  
9,1,2301.637755

9,1,56545.375000  
9,1,1940.397436  
9,1,1926.086310  
9,1,110184.361842  
9,1,1646.750000  
9,1,10696.457143  
9,1,2136.257353  
9,1,3348.477273  
9,1,2445.314136  
9,1,99040.789634  
9,1,1557.400000  
9,1,2956.166667  
9,1,21575.564024  
9,1,14291.159091  
9,1,2797.416667  
9,1,27513.818750  
9,1,2019.558511  
9,1,48852.359375  
9,1,4603.071429  
9,1,9948.111413  
9,1,9220.437500  
9,1,1891.125000  
9,1,11665.350962  
9,1,4293.541667  
9,1,2206.333333  
9,1,31079.953125  
9,1,4370.104651  
9,1,88147.062500  
9,1,7985.762500  
9,1,2519.164474  
9,1,14009.817308  
9,1,100886.825000  
9,1,5869.327778  
9,1,6106.029412  
9,1,5714.762500  
9,1,4798.493902  
9,1,84683.977941  
9,1,3590.587209  
9,1,1769.788889  
9,1,4621.710784  
9,1,5222.770833  
9,1,1657.191489  
9,1,2672.753125  
9,1,79110.340909  
9,1,2506.720109  
9,1,3403.007812  
9,1,98713.562500  
9,1,2022.900000  
9,1,4908.734375  
9,1,2656.102500  
9,1,2163.042553  
9,1,44826.842857  
9,1,1675.653061  
9,1,2877.333333  
9,1,26835.609375  
9,1,3360.500000  
9,1,1557.033537  
9,1,6146.727273  
9,1,1686.888298  
9,1,4744.128205  
9,1,2451.187500  
9,1,13019.239362  
9,1,86494.809211  
9,1,1628.040698  
9,1,15103.022727  
9,1,40709.354651

9,1,7146.031250  
9,1,1935.500000  
9,1,33739.007812  
9,1,5058.776316  
9,1,3459.791667  
9,1,4326.916667  
9,1,72936.500000  
9,1,1698.828804  
9,1,27231.833333  
9,1,2372.291667  
9,1,1760.870192  
9,1,18656.516129  
9,1,37458.760204  
9,1,76822.196429  
9,1,3473.841667  
9,1,4182.071429  
9,1,7379.575581  
9,1,12998.669355  
9,1,2093.292683  
9,1,23857.190476  
9,1,3564.551282  
9,1,4861.809211  
9,1,1823.788462  
9,1,33143.191176  
9,1,2613.128125  
9,1,15702.065476  
9,1,7666.923611  
9,1,1837.961538  
9,1,1654.000000  
9,1,2476.043478  
9,1,1815.422619  
9,1,2835.542857  
9,1,7819.500000  
9,1,32357.378906  
9,1,5151.933333  
9,1,83728.693750  
9,1,1747.686047  
9,1,2481.452128  
9,1,1985.149390  
9,1,28464.285714  
9,1,13244.183594  
9,1,2930.375000  
9,1,2324.872642  
9,1,35230.942857  
9,1,6509.331633  
9,1,1694.109043  
9,1,63744.375000  
9,1,73335.805556  
9,1,2128.896341  
9,1,1716.988889  
9,1,7740.191176  
9,1,3744.291667  
9,1,34136.517857  
9,1,1737.068182  
9,1,48975.225000  
9,1,2709.291667  
9,1,1850.750000  
9,1,24833.618182  
9,1,13612.996324  
9,1,1679.604167  
9,1,1757.720000  
9,1,1545.738372  
9,1,120237.127907  
9,1,24130.500000  
9,1,40315.589744  
9,1,4248.634434

9,1,2736.006757  
9,1,146652.744898  
9,1,76273.179878  
9,1,3164.585366  
9,1,76952.231707  
9,1,138684.423077  
9,1,3753.746711  
9,1,2010.387500  
9,1,4567.500000  
9,1,2486.637500  
9,1,1806.137500  
9,1,1689.742347  
9,1,1582.354730  
9,1,6073.375000  
9,1,70370.577778  
9,1,3965.117647  
9,1,2253.602941  
9,1,38945.417969  
9,1,11310.506410  
9,1,4254.222222  
9,1,32028.405405  
9,1,81769.346154  
9,1,1993.714286  
9,1,5153.859375  
9,1,3232.714286  
9,1,15661.909375  
9,1,3231.312500  
9,1,8001.453125  
9,1,3263.087766  
9,1,4186.976064  
9,1,4317.296296  
9,1,2837.321429  
9,1,17778.529412  
9,1,4620.019608  
9,1,2489.279070  
9,1,50842.207031  
9,1,3256.588235  
9,1,1977.815217  
9,1,33624.675676  
9,1,4401.846154  
9,1,1764.196970  
9,1,12642.343023  
9,1,14855.790541  
9,1,2623.443750  
9,1,78127.916667  
9,1,54179.536765  
9,1,140819.821429  
9,1,1728.961538  
9,1,111260.556818  
9,1,1514.430851  
9,1,3342.906977  
9,1,13381.631098  
9,1,1547.297872  
9,1,1628.541667  
9,1,4485.489362  
9,1,1857.317308  
9,1,2059.953488  
9,1,126145.011364  
9,1,1682.958333  
9,1,3874.145349  
9,1,14917.268293  
9,1,9366.787791  
9,1,1802.142857  
9,1,108077.000000  
9,1,2369.448370  
9,1,11083.506410

9,1,33311.731250  
9,1,62442.456250  
9,1,1891.380952  
9,1,11985.946429  
9,1,1702.826220  
9,1,2750.369565  
9,1,1591.678125  
9,1,13161.355072  
9,1,2549.402344  
9,1,1676.632500  
9,1,1696.392442  
9,1,23083.393617  
9,1,1733.733696  
9,1,90106.770833  
9,1,2602.789474  
9,1,2585.112805  
9,1,3722.302326  
9,1,1979.512500  
9,1,7087.930233  
9,1,68070.406977  
9,1,1787.732558  
9,1,2099.360714  
9,1,2055.093750  
9,1,2031.700000  
9,1,2007.535714  
9,1,3223.347561  
9,1,5654.530612  
9,1,1499.812500  
9,1,146482.613095  
9,1,6072.843750  
9,1,67883.596429  
9,1,1854.114130  
9,1,2931.266667  
9,1,1620.750000  
9,1,44422.523437  
9,1,6142.080357  
9,1,37810.724832  
9,1,110063.823529  
9,1,3942.442308  
9,1,2018.661585  
9,1,22786.423387  
9,1,2979.391447  
9,1,176440.583333  
9,1,2275.954787  
9,1,2063.630435  
9,1,62152.347561  
9,1,7233.965278  
9,1,2900.615385  
9,1,134150.030612  
9,1,4242.294118  
9,1,151842.301136  
9,1,2311.154762  
9,1,1866.696875  
9,1,50277.819767  
9,1,23866.536585  
9,1,1627.269444  
9,1,3822.055556  
9,1,31258.485294  
9,1,4831.329268  
9,1,24501.778409  
9,1,1913.268293  
9,1,7782.850000  
9,1,55201.250000  
9,1,61633.409091  
9,1,2079.197674  
9,1,3477.425000

9,1,7998.342391  
9,1,13745.992647  
9,1,11005.303571  
9,1,83144.000000  
9,1,2709.875000  
9,1,1708.225000  
9,1,9333.828947  
9,1,9511.636943  
9,1,1547.875000  
9,1,1738.977273  
9,1,2764.537234  
9,1,6405.353659  
9,1,2760.460526  
9,1,2711.219512  
9,1,31952.389706  
9,1,134960.479651  
9,1,44703.308824  
9,1,15279.863636  
9,1,5587.601351  
9,1,1821.977273  
9,1,1813.080882  
9,1,1761.430000  
9,1,7987.227273  
9,1,1631.571429  
9,1,1503.791667  
9,1,2087.607143  
9,1,2300.833333  
9,1,3631.368421  
9,1,1849.246795  
9,1,94275.398649  
9,1,63404.605469  
9,1,6393.962500  
9,1,2360.990385  
9,1,55692.217391  
9,1,2638.947368  
9,1,4179.340909  
9,1,106045.325000  
9,1,66972.333333  
9,1,3786.350000  
9,1,13885.428571  
9,1,8841.416667  
9,1,2500.853261  
9,1,70729.506098  
9,1,65536.710938  
9,1,25501.405000  
9,1,2745.592105  
9,1,1745.320000  
9,1,2404.635638  
9,1,105011.875000  
9,1,47215.616477  
9,1,1908.580000  
9,1,39466.209459  
9,1,4989.286364  
9,1,2140.531250  
9,1,33475.411458  
9,1,4419.214286  
9,1,11660.551282  
9,1,4543.510638  
9,1,4739.294872  
9,1,11961.828571  
9,1,2073.375000  
9,1,15185.702500  
9,1,3840.989583  
9,1,2116.477273  
9,1,2962.146341  
9,1,56776.431818

9,1,9171.122024  
9,1,2515.785714  
9,1,3213.743243  
9,1,52947.756579  
9,1,6065.773438  
9,1,23518.035256  
9,1,2047.628378  
9,1,67333.843750  
9,1,63874.553571  
9,1,2130.430921  
9,1,82083.684524  
9,1,2851.634146  
9,1,2338.601064  
9,1,2117.006579  
9,1,3405.312500  
9,1,1597.208333  
9,1,1668.724490  
9,1,5918.932692  
9,1,15159.742925  
9,1,1655.908088  
9,1,2605.225000  
9,1,9212.731707  
9,1,2618.553191  
9,1,6450.909483  
9,1,3802.471774  
9,1,3842.410714  
9,1,2285.295732  
9,1,6357.625000  
9,1,4530.529412  
9,1,5421.450521  
9,1,1832.242647  
9,1,1859.455882  
9,1,14852.090909  
9,1,44017.595930  
9,1,48559.921053  
9,1,3495.530405  
9,1,22537.282258  
9,1,9634.697674  
9,1,1639.743056  
9,1,16521.194149  
9,1,13131.423611  
9,1,1539.173780  
9,1,2352.458333  
9,1,4844.500000  
9,1,3355.106250  
9,1,1843.688889  
9,1,2384.687500  
9,1,2871.160714  
9,1,2168.920455  
9,1,86141.043605  
9,1,16381.894231  
9,1,6311.734694  
9,1,1778.229167  
9,1,4955.531250  
9,1,32478.035714  
9,1,64414.055921  
9,1,60581.532051  
9,1,3036.978723  
9,1,6468.500000  
9,1,16422.554167  
9,1,6533.515086  
9,1,26979.479167  
9,1,1852.959239  
9,1,1720.053125  
9,1,23379.447368  
9,1,2116.772727

9,1,50455.562500  
9,1,3582.628289  
9,1,46678.179487  
9,1,3592.141892  
9,1,96769.346154  
9,1,1859.994792  
9,1,3728.125000  
9,1,43168.722222  
9,1,3832.171875  
9,1,72419.265244  
9,1,100290.000000  
9,1,6765.255319  
9,1,8634.306604  
9,1,1730.708333  
9,1,26963.480769  
9,1,3742.170732  
9,1,78020.118421  
9,1,11871.807292  
9,1,13064.571429  
9,1,10468.279412  
9,1,2545.437500  
9,1,1836.557500  
9,1,2158.250000  
9,1,3565.793750  
9,1,3206.187500  
9,1,1729.637500  
9,1,4329.275510  
9,1,3365.618421  
9,1,4561.869565  
9,1,1786.500000  
9,1,51478.692308  
9,1,2062.267442  
9,1,11019.301508  
9,1,149141.625000  
9,1,5713.245614  
9,1,60510.937500  
9,1,10183.105556  
9,1,1508.264205  
9,1,1756.572674  
9,1,1501.416667  
9,1,1654.554054  
9,1,8713.494048  
9,1,57362.628049  
9,1,2335.750000  
9,1,3473.363636  
9,1,26847.041667  
9,1,61284.526316  
9,1,63200.086538  
9,1,3205.718750  
9,1,2509.904762  
9,1,1916.734756  
9,1,7225.437500  
9,1,2055.360119  
9,1,4596.932292  
9,1,2814.398649  
9,1,74336.082500  
9,1,2398.717391  
9,1,12504.697917  
9,1,10092.772959  
9,1,4905.563830  
9,1,2211.600000  
9,1,8923.102273  
9,1,2746.400000  
9,1,1784.062500  
9,1,1808.595238  
9,1,1596.880682

9,1,2514.871951  
9,1,2061.395833  
9,1,4843.355556  
9,1,8301.103659  
9,1,123162.277778  
9,1,41286.658537  
9,1,9283.083333  
9,1,2833.515625  
9,1,2549.611702  
9,1,1758.964744  
9,1,14113.470833  
9,1,1584.090909  
9,1,1964.068182  
9,1,1958.780405  
9,1,5836.437500  
9,1,5426.614130  
9,1,2590.302632  
9,1,4875.910326  
9,1,81866.662791  
9,1,4663.366667  
9,1,6729.275568  
9,1,8624.731707  
9,1,9604.991477  
9,1,3463.216346  
9,1,1528.250000  
9,1,1705.192935  
9,1,2040.583333  
9,1,1863.597561  
9,1,2907.000000  
9,1,47856.363636  
9,1,4676.500000  
9,1,33942.616935  
9,1,3292.520408  
9,1,2822.202703  
9,1,2420.418919  
9,1,2846.698864  
9,1,1644.611111  
9,1,1569.220930  
9,1,10080.145833  
9,1,65111.888158  
9,1,1666.772436  
9,1,10079.329545  
9,1,2794.829268  
9,1,24795.320312  
9,1,1969.812500  
9,1,26313.284091  
9,1,9908.486413  
9,1,22246.514423  
9,1,3660.573171  
9,1,43733.152778  
9,1,2144.930556  
9,1,6139.652174  
9,1,4865.140625  
9,1,2528.684783  
9,1,59821.769737  
9,1,1791.630208  
9,1,86044.500000  
9,1,32603.250000  
9,1,5898.467262  
9,1,152749.338068  
9,1,11833.950000  
9,1,1887.109756  
9,1,3660.477273  
9,1,20592.878788  
9,1,67919.072222  
9,1,3208.750000

9,1,2050.421875  
9,1,191240.263158  
9,1,64503.195946  
9,1,2652.925781  
9,1,1927.521277  
9,1,79218.250000  
9,1,37207.789474  
9,1,44887.256410  
9,1,3915.529762  
9,1,4572.640625  
9,1,1814.097561  
9,1,3561.802778  
9,1,53785.565789  
9,1,26143.618590  
9,1,2595.180085  
9,1,1546.435811  
9,1,39189.652778  
9,1,12439.798077  
9,1,1879.269737  
9,1,1654.055556  
9,1,2201.265306  
9,1,27473.488971  
9,1,44022.989130  
9,1,4578.375000  
9,1,2153.872093  
9,1,1988.985294  
9,1,3059.752907  
9,1,2026.764205  
9,1,1519.715278  
9,1,7895.975610  
9,1,4364.343750  
9,1,1593.025641  
9,1,2076.997024  
9,1,13444.353261  
9,1,4075.000000  
9,1,1695.808333  
9,1,2165.426829  
9,1,5462.047297  
9,1,1572.818182  
9,1,2245.276596  
9,1,4131.439759  
9,1,1626.046875  
9,1,9800.128205  
9,1,2235.444444  
9,1,45968.045455  
9,1,4162.237500  
9,1,1708.950000  
9,1,2699.750000  
9,1,3486.523437  
9,1,5252.445355  
9,1,2587.084459  
9,1,62334.934211  
9,1,13710.149457  
9,1,1898.056548  
9,1,1511.130435  
9,1,3070.546875  
9,1,4554.779891  
9,1,2829.989130  
9,1,3064.359375  
9,1,7337.398810  
9,1,2050.656250  
9,1,44031.428571  
9,1,3273.255435  
9,1,3606.676829  
9,1,3329.274390  
9,1,25863.470588

9,1,1600.711111  
9,1,2005.212766  
9,1,104646.233108  
9,1,1604.053571  
9,1,2234.270833  
9,1,3350.312500  
9,1,2231.930556  
9,1,40076.176471  
9,1,2855.162791  
9,1,2959.300000  
9,1,30774.241379  
9,1,1705.898936  
9,1,14543.125000  
9,1,46542.720588  
9,1,45466.295139  
9,1,2064.609756  
9,1,4610.910714  
9,1,1867.318182  
9,1,43663.927083  
9,1,58946.666667  
9,1,7516.452703  
9,1,1505.625000  
9,1,32592.779070  
9,1,3992.715909  
9,1,1997.300532  
9,1,3893.529070  
9,1,3901.375000  
9,1,139309.313953  
9,1,2158.178571  
9,1,65147.038462  
9,1,1518.219512  
9,1,2236.829545  
9,1,8296.731250  
9,1,11476.773437  
9,1,1674.462766  
9,1,154559.150000  
9,1,4676.928571  
9,1,5075.380682  
9,1,2449.985294  
9,1,2197.910714  
9,1,12162.708333  
9,1,1586.457143  
9,1,1633.750000  
9,1,1572.803191  
9,1,1814.152174  
9,1,5205.763158  
9,1,31855.230769  
9,1,3809.933333  
9,1,4918.800000  
9,1,1614.196078  
9,1,3000.738095  
9,1,64353.536585  
9,1,51899.292683  
9,1,33307.769531  
9,1,1833.138889  
9,1,1660.558140  
9,1,7921.306604  
9,1,2274.653846  
9,1,1770.200000  
9,1,25255.285714  
9,1,6418.992188  
9,1,2513.111702  
9,1,2055.737500  
9,1,1516.285714  
9,1,2429.557432  
9,1,3566.277027

9,1,1727.180233  
9,1,1841.073171  
9,1,1770.534091  
9,1,2504.250000  
9,1,3070.989583  
9,1,66115.875000  
9,1,72501.109375  
9,1,6779.191810  
9,1,1829.340686  
9,1,2484.807432  
9,1,21191.871528  
9,1,3824.600000  
9,1,5964.196809  
9,1,36382.093023  
9,1,12445.212121  
9,1,12854.130556  
9,1,51399.040541  
9,1,3883.789474  
9,1,1504.985294  
9,1,4469.595745  
9,1,4820.303571  
9,1,3252.125000  
9,1,1919.116279  
9,1,3207.390625  
9,1,49673.072368  
9,1,5672.848214  
9,1,2245.083333  
9,1,2948.987179  
9,1,57667.957143  
9,1,20163.441176  
9,1,16155.345000  
9,1,2204.448171  
9,1,5148.356250  
9,1,2649.862245  
9,1,2651.173913  
9,1,2263.743902  
9,1,1546.513587  
9,1,57804.321429  
9,1,2394.144231  
9,1,1503.798295  
9,1,14435.682692  
9,1,3895.516667  
9,1,119631.980769  
9,1,4039.405405  
9,1,55902.303571  
9,1,3731.945122  
9,1,7999.906250  
9,1,3454.361963  
9,1,12105.200000  
9,1,3978.255556  
9,1,3528.640625  
9,1,2760.545455  
9,1,15364.581522  
9,1,1674.882353  
9,1,40355.256757  
9,1,96050.074405  
9,1,58230.963816  
9,1,1980.359756  
9,1,4694.273438  
9,1,1530.905556  
9,1,3737.799479  
9,1,13013.724265  
9,1,1973.975610  
9,1,1909.214286  
9,1,77145.604167  
9,1,1739.020833

9,1,36038.077206  
9,1,2370.409091  
9,1,8339.718023  
9,1,1734.093023  
9,1,130331.633721  
9,1,13028.863636  
9,1,1872.058824  
9,1,2525.076923  
9,1,1773.304878  
9,1,3337.994898  
9,1,5390.342262  
9,1,5346.281250  
9,1,1843.915865  
9,1,2392.393750  
9,1,1729.285714  
9,1,111607.957317  
9,1,3036.937500  
9,1,2059.000000  
9,1,42950.527027  
9,1,4431.297872  
9,1,6958.158784  
9,1,130061.007812  
9,1,1689.059375  
9,1,65809.250000  
9,1,23062.375000  
9,1,2585.176471  
9,1,14209.092949  
9,1,1772.030488  
9,1,2139.193548  
9,1,112579.350000  
9,1,1926.383152  
9,1,5038.812500  
9,1,34581.664062  
9,1,1932.825000  
9,1,26912.078125  
9,1,1817.826087  
9,1,1775.261029  
9,1,3310.470588  
9,1,3123.779891  
9,1,20296.500000  
9,1,2186.556250  
9,1,3066.049419  
9,1,3559.574324  
9,1,14400.211207  
9,1,1646.511628  
9,1,2015.063725  
9,1,1746.050000  
9,1,1886.121951  
9,1,4220.315476  
9,1,5194.593750  
9,1,18502.213068  
9,1,2316.127660  
9,1,119598.607143  
9,1,2347.107558  
9,1,15296.838235  
9,1,1695.592391  
9,1,1523.225806  
9,1,10602.925000  
9,1,2039.442935  
9,1,4338.307692  
9,1,1969.931818  
9,1,2088.915698  
9,1,23448.650000  
9,1,78155.625000  
9,1,32952.119048  
9,1,2776.243421

9,1,64471.609375  
9,1,2496.546875  
9,1,72335.651961  
9,1,4020.453125  
9,1,1640.578947  
9,1,2214.357143  
9,1,9590.768293  
9,1,56765.795455  
9,1,6587.217391  
9,1,1757.364362  
9,1,4486.280488  
9,1,1767.636364  
9,1,7812.617021  
9,1,2170.774390  
9,1,2647.734756  
9,1,1577.538462  
9,1,6815.226744  
9,1,2696.826087  
9,1,5656.650000  
9,1,106494.179487  
9,1,3408.949074  
9,1,1596.701923  
9,1,2000.562500  
9,1,1518.711957  
9,1,6655.561441  
9,1,1624.225000  
9,1,2907.900000  
9,1,2840.286585  
9,1,2653.323864  
9,1,11538.906250  
9,1,2405.826220  
9,1,21884.457386  
9,1,38009.523256  
9,1,4540.533333  
9,1,4362.264706  
9,1,50813.073529  
9,1,2642.149510  
9,1,2708.328488  
9,1,1781.645270  
9,1,26936.116279  
9,1,2573.000000  
9,1,19475.147059  
9,1,38642.818182  
9,1,2833.828571  
9,1,1559.375000  
9,1,38595.872093  
9,1,1786.183824  
9,1,3189.562500  
9,1,3488.231707  
9,1,2150.000000  
9,1,32589.580357  
9,1,28183.278846  
9,1,2361.053977  
9,1,1544.464286  
9,1,2157.049419  
9,1,2523.000000  
9,1,6844.250000  
9,1,5774.328571  
9,1,2642.606250  
9,1,13956.475610  
9,1,1534.968750  
9,1,6834.000000  
9,1,4170.041667  
9,1,67165.631579  
9,1,106574.718750  
9,1,7652.595588

9,1,1856.139535  
9,1,2325.199405  
9,1,23439.500000  
9,1,1986.017442  
9,1,2284.036765  
9,1,5491.865854  
9,1,1697.387500  
9,1,7657.127778  
9,1,69430.164474  
9,1,1851.019737  
9,1,1569.443750  
9,1,5475.250000  
9,1,1877.315217  
9,1,2524.727273  
9,1,57445.753472  
9,1,119066.792683  
9,1,6174.917453  
9,1,2118.678571  
9,1,24986.937500  
9,1,16395.519886  
9,1,3776.697917  
9,1,2163.866279  
9,1,52863.961806  
9,1,1609.655556  
9,1,3777.189024  
9,1,59645.440000  
9,1,8885.102041  
9,1,2613.076923  
9,1,1529.111486  
9,1,2881.500000  
9,1,2315.000000  
9,1,19625.818750  
9,1,79018.746951  
9,1,3986.463235  
9,1,1729.750000  
9,1,8482.945122  
9,1,1924.548611  
9,1,43362.931818  
9,1,2155.477273  
9,1,41388.758721  
9,1,2564.595238  
9,1,2734.668478  
9,1,1713.585366  
9,1,1733.835366  
9,1,2626.937500  
9,1,2736.441860  
9,1,2084.194444  
9,1,5416.005208  
9,1,8039.872340  
9,1,8442.010417  
9,1,2078.750000  
9,1,1987.071429  
9,1,2736.761364  
9,1,2219.000000  
9,1,1896.519737  
9,1,5563.821429  
9,1,4909.317073  
9,1,52931.575000  
9,1,2296.000000  
9,1,1928.797297  
9,1,2235.843750  
9,1,5555.772727  
9,1,1596.902778  
9,1,14111.261364  
9,1,4779.944444  
9,1,2350.596591

9,1,5802.375000  
9,1,2324.429348  
9,1,1770.193182  
9,1,3013.346154  
9,1,32665.440789  
9,1,53364.637427  
9,1,1933.226351  
9,1,5873.333333  
9,1,2196.918367  
9,1,44933.230769  
9,1,4166.016304  
9,1,1594.903846  
9,1,47234.685714  
9,1,5740.674419  
9,1,2798.338889  
9,1,27460.250000  
9,1,4916.242647  
9,1,1745.845745  
9,1,13384.628049  
9,1,2751.528409  
9,1,4143.308594  
9,1,1607.093750  
9,1,1937.514881  
9,1,1801.892857  
9,1,4496.848684  
9,1,3177.078571  
9,1,1879.077206  
9,1,2681.550000  
9,1,3633.899390  
9,1,60630.907051  
9,1,6530.268617  
9,1,3990.363636  
9,1,2106.430233  
9,1,24695.729839  
9,1,3291.821429  
9,1,1660.250000  
9,1,2929.833333  
9,1,1602.057143  
9,1,2121.575000  
9,1,4833.325521  
9,1,106154.256250  
9,1,2014.689024  
9,1,6310.687500  
9,1,24298.648649  
9,1,4498.369048  
9,1,8486.660714  
9,1,1825.375000  
9,1,2429.562500  
9,1,2032.874396  
9,1,1939.396341  
9,1,2180.609375  
9,1,2800.205696  
9,1,9913.739362  
9,1,2042.687500  
9,1,2193.384615  
9,1,1912.759146  
9,1,1730.042105  
9,1,9023.105263  
9,1,81133.597973  
9,1,4385.395270  
9,1,2171.261905  
9,1,3263.547794  
9,1,1525.377976  
9,1,3313.142857  
9,1,64534.606250  
9,1,1968.617647

9,1,91875.556250  
9,1,4212.509615  
9,1,1538.266667  
9,1,129286.406977  
9,1,5182.777778  
9,1,1541.091146  
9,1,2365.045000  
9,1,99901.250000  
9,1,1669.684524  
9,1,17824.000000  
9,1,4276.645833  
9,1,9523.435484  
9,1,2007.200000  
9,1,2086.000000  
9,1,1944.823529  
9,1,7960.842105  
9,1,8028.950658  
9,1,3451.029762  
9,1,22801.565217  
9,1,6918.500000  
9,1,1623.428571  
9,1,1762.842949  
9,1,5905.923077  
9,1,91225.786184  
9,1,51386.960227  
9,1,5847.739796  
9,1,3770.325658  
9,1,2809.763587  
9,1,5257.279070  
9,1,27038.611413  
9,1,14721.020833  
9,1,1626.984375  
9,1,1997.675000  
9,1,2023.867647  
9,1,3200.680851  
9,1,2501.664062  
9,1,2050.048295  
9,1,11522.050532  
9,1,77488.107143  
9,1,2085.263587  
9,1,4730.076531  
9,1,7599.333333  
9,1,23972.625000  
9,1,90292.630682  
9,1,3285.900000  
9,1,1764.506944  
9,1,2038.022727  
9,1,2521.614865  
9,1,55759.461538  
9,1,18399.937500  
9,1,1746.821429  
9,1,1905.418605  
9,1,7214.922619  
9,1,5087.153846  
9,1,1636.470930  
9,1,62938.210714  
9,1,12858.300000  
9,1,3267.916667  
9,1,1866.586957  
9,1,1826.642857  
9,1,7050.820513  
9,1,54218.834459  
9,1,192800.035714  
9,1,1717.755556  
9,1,1917.378788  
9,1,4877.588235

9,1,2962.516892  
9,1,1993.937500  
10,2,10419.055556  
10,2,2842.343750  
10,2,1742.170918  
10,2,3600.500000  
10,2,4948.954082  
10,2,1999.081081  
10,2,1621.513393  
10,2,3498.142857  
10,2,3099.348837  
10,2,3679.303571  
10,2,2023.399194  
10,2,2336.106383  
10,2,2751.416667  
10,2,3468.407895  
10,2,2346.325581  
10,2,7779.095930  
10,2,1619.777778  
10,2,2460.093750  
10,2,1600.738095  
10,2,1874.816038  
10,2,1539.750000  
10,2,11076.000000  
10,2,2119.558511  
10,2,2198.760870  
10,2,6246.702703  
10,2,1512.409574  
10,2,1926.132979  
10,2,9039.755102  
10,2,4794.898936  
10,2,2372.688830  
10,2,5594.689815  
10,2,4195.116071  
10,2,2520.689655  
10,2,3148.410256  
10,2,5293.015625  
10,2,1647.625000  
10,2,1711.671053  
10,2,1963.454861  
10,2,2251.557377  
10,2,6245.891213  
10,2,1788.750000  
10,2,6018.950000  
10,2,3685.572674  
10,2,1683.000000  
10,2,2702.732794  
10,2,2183.500000  
10,2,9905.762755  
10,2,1645.475000  
10,2,5172.426020  
10,2,11864.268293  
10,2,5733.062500  
10,2,3253.700000  
10,2,4107.838542  
10,2,2261.180272  
10,2,4213.440559  
10,2,13568.337037  
10,2,5746.425000  
10,2,6022.385000  
10,2,3205.954545  
10,2,1696.640625  
10,2,7533.000000  
10,2,1664.131579  
10,2,1966.305233  
10,2,3080.750000

10,2,1673.444149  
10,2,2960.308140  
10,2,4030.357955  
10,2,4198.555556  
10,2,5124.484375  
10,2,3087.137500  
10,2,4438.091743  
10,2,3470.642857  
10,2,3648.928571  
10,2,2724.697500  
10,2,3145.496711  
10,2,2810.088235  
10,2,3143.237069  
10,2,3070.026786  
10,2,3708.795918  
10,2,1946.117647  
10,2,3810.213415  
10,2,3457.181122  
10,2,6050.743182  
10,2,1798.986486  
10,2,2547.036585  
10,2,2751.921569  
10,2,2054.432500  
10,2,6445.005952  
10,2,3610.750000  
10,2,2322.316038  
10,2,1595.916667  
10,2,3898.019231  
10,2,2859.015152  
10,2,1842.163690  
10,2,5878.615909  
10,2,1971.610119  
10,2,1584.937500  
10,2,1993.886792  
10,2,3482.125000  
10,2,2155.352941  
10,2,2664.493750  
10,2,1805.616667  
10,2,7707.582031  
10,2,5917.895349  
10,2,2807.757353  
10,2,1605.477778  
10,2,1569.200000  
10,2,1612.796053  
10,2,2117.108333  
10,2,3657.138514  
10,2,1577.988372  
10,2,5805.692708  
10,2,4610.521635  
10,2,3924.109375  
10,2,12948.796875  
10,2,3266.687500  
10,2,3865.250000  
10,2,12695.757653  
10,2,1871.091146  
10,2,2598.056818  
10,2,1881.538462  
10,2,3706.163265  
10,2,4882.888158  
10,2,5317.218750  
10,2,1972.727778  
10,2,5608.359375  
10,2,2575.204082  
10,2,4031.212500  
10,2,11139.743590  
10,2,1628.770115

10,2,2642.568966  
10,2,4575.840000  
10,2,2243.181250  
10,2,4581.767442  
10,2,4934.800000  
10,2,9442.420732  
10,2,2349.784091  
10,2,5305.734694  
10,2,6400.460938  
10,2,6640.969907  
10,2,2009.055000  
10,2,5146.108108  
10,2,17473.391304  
10,2,1618.154762  
10,2,1562.153846  
10,2,2838.870098  
10,2,2838.646341  
10,2,3001.515625  
10,2,3612.456395  
10,2,8528.437500  
10,2,6097.266667  
10,2,6612.743056  
10,2,3752.321429  
10,2,4016.633929  
10,2,10048.849359  
10,2,1725.022222  
10,2,6838.137097  
10,2,8729.831250  
10,2,1801.696809  
10,2,2194.187500  
10,2,5438.488372  
10,2,2186.019126  
10,2,1836.541667  
10,2,3233.579545  
10,2,4199.000000  
10,2,4465.637681  
10,2,2695.656250  
10,2,2602.552147  
10,2,4783.467391  
10,2,3911.280612  
10,2,2747.102273  
10,2,3864.800000  
10,2,8071.466837  
10,2,2614.340426  
10,2,10556.000000  
10,2,3522.976190  
10,2,2379.822222  
10,2,33910.430233  
10,2,6532.562500  
10,2,4221.772059  
10,2,4148.765625  
10,2,1589.297619  
10,2,2741.060000  
10,2,4289.759868  
10,2,2934.406977  
10,2,2275.736842  
10,2,9556.328740  
10,2,1566.173077  
10,2,1974.586957  
10,2,2342.720000  
10,2,3354.756757  
10,2,2826.388889  
10,2,1522.512500  
10,2,5889.240385  
10,2,4967.453804  
10,2,12400.614130

10,2,7266.600000  
10,2,4212.080357  
10,2,1589.774510  
10,2,2081.027778  
10,2,2996.272727  
10,2,2791.052083  
10,2,4853.193548  
10,2,3839.966981  
10,2,3624.861925  
10,2,2960.636364  
10,2,4505.644444  
10,2,4436.756757  
10,2,2496.750000  
10,2,3683.992718  
10,2,6403.681818  
10,2,1784.637755  
10,2,1679.525000  
10,2,1654.200000  
10,2,2484.521429  
10,2,5935.753125  
10,2,4116.380000  
10,2,3204.833333  
10,2,3141.005435  
10,2,2090.131579  
10,2,9521.416667  
10,2,1899.511719  
10,2,10057.531915  
10,2,7978.095238  
10,2,2159.693878  
10,2,1695.039216  
10,2,2281.105114  
10,2,3309.093750  
10,2,16815.875000  
10,2,8163.727273  
10,2,4467.125000  
10,2,2356.714286  
10,2,3117.923077  
10,2,3299.973404  
10,2,8308.158416  
10,2,1839.513158  
10,2,3438.677885  
10,2,2279.817935  
10,2,2782.894737  
10,2,3976.812500  
10,2,3023.507500  
10,2,2077.605114  
10,2,4245.119318  
10,2,10114.745000  
10,2,2659.416667  
10,2,4724.081633  
10,2,7269.127907  
10,2,5002.571429  
10,2,2594.839286  
10,2,2641.983333  
10,2,2678.615385  
10,2,1586.676316  
10,2,3824.005155  
10,2,1857.500000  
10,2,1968.114583  
10,2,5834.592593  
10,2,4249.737864  
10,2,2367.730769  
10,2,2195.150000  
10,2,4004.538462  
10,2,2333.128125  
10,2,1538.937500

10,2,11284.453125  
10,2,6800.407500  
10,2,1739.652778  
10,2,3670.975543  
10,2,3721.224490  
10,2,2334.489796  
10,2,1942.250000  
10,2,2002.326923  
10,2,10500.173077  
10,2,2558.573529  
10,2,1613.737500  
10,2,1690.403846  
10,2,1709.868644  
10,2,1930.563830  
10,2,2110.000000  
10,2,4050.238095  
10,2,4545.487705  
10,2,17150.000000  
10,2,1584.977273  
10,2,2327.246711  
10,2,11408.976562  
10,2,5491.436364  
10,2,5864.093750  
10,2,2785.482639  
10,2,7172.875000  
10,2,2163.043269  
10,2,4012.459302  
10,2,3489.367021  
10,2,2585.850000  
10,2,9309.230769  
10,2,7368.109756  
10,2,1816.562500  
10,2,2055.676991  
10,2,13022.092391  
10,2,1834.268750  
10,2,3103.315789  
10,2,2213.609756  
10,2,12414.659639  
10,2,3576.606383  
10,2,2006.139706  
10,2,4074.068750  
10,2,3867.047872  
10,2,2021.699507  
10,2,3123.232558  
10,2,1513.263298  
10,2,2431.921788  
10,2,14787.011364  
10,2,12061.033333  
10,2,1886.208333  
10,2,1626.256250  
10,2,2116.638158  
10,2,3441.575581  
10,2,7507.033019  
10,2,1676.825581  
10,2,3285.722826  
10,2,3230.348837  
10,2,2550.164062  
10,2,1818.552326  
10,2,1859.773810  
10,2,6926.473684  
10,2,5301.997093  
10,2,6802.650943  
10,2,2946.604167  
10,2,3906.937500  
10,2,3240.842105  
10,2,1782.230000

10,2,3382.991848  
10,2,2204.629310  
10,2,5290.181818  
10,2,3358.769231  
10,2,10290.281250  
10,2,1733.220238  
10,2,1664.948980  
10,2,1735.007812  
10,2,2272.674419  
10,2,4295.460000  
10,2,3699.880000  
10,2,2153.220109  
10,2,4449.433333  
10,2,2278.733108  
10,2,2520.834375  
10,2,4654.573171  
10,2,1834.975610  
10,2,5764.405405  
10,2,1582.681250  
10,2,6891.162791  
10,2,2770.953125  
10,2,4196.893617  
10,2,1794.906250  
10,2,2406.220930  
10,2,1782.500000  
10,2,9448.562500  
10,2,3876.500000  
10,2,4081.375000  
10,2,2093.012821  
10,2,2538.838235  
10,2,1911.269737  
10,2,4412.606707  
10,2,7777.566667  
10,2,3177.423077  
10,2,14681.970060  
10,2,6208.919118  
10,2,5614.596774  
10,2,1811.130000  
10,2,1978.178771  
10,2,2087.167614  
10,2,3009.272727  
10,2,4681.166667  
10,2,5864.299020  
10,2,4290.701357  
10,2,1968.304878  
10,2,4795.562500  
10,2,2449.223958  
10,2,2230.093750  
10,2,2221.000000  
10,2,2912.814815  
10,2,5143.349490  
10,2,1550.416667  
10,2,2761.056452  
10,2,1803.941176  
10,2,1995.093750  
10,2,3335.000000  
10,2,5436.450549  
10,2,2798.727273  
10,2,4268.528302  
10,2,1575.243056  
10,2,1981.875000  
10,2,7625.299020  
10,2,1975.153846  
10,2,6095.913462  
10,2,5771.429448  
10,2,3218.117647

10,2,6128.994565  
10,2,1550.730978  
10,2,1607.345930  
10,2,2516.859375  
10,2,1574.682692  
10,2,4149.437500  
10,2,5457.294872  
10,2,2261.000000  
10,2,8569.682927  
10,2,2446.976744  
10,2,4452.968085  
10,2,4016.347345  
10,2,1663.752688  
10,2,11927.059783  
10,2,8323.294271  
10,2,2501.509091  
10,2,1540.375000  
10,2,1667.483553  
10,2,49852.764423  
10,2,1896.130435  
10,2,2274.744048  
10,2,2711.044118  
10,2,2028.333333  
10,2,2270.097561  
10,2,2073.565000  
10,2,11512.444444  
10,2,2893.918478  
10,2,1842.239583  
10,2,2930.788194  
10,2,1890.159884  
10,2,1579.921875  
10,2,1551.572674  
10,2,2168.318750  
10,2,1755.291667  
10,2,3060.200000  
10,2,1937.441860  
10,2,3675.250000  
10,2,12527.204787  
10,2,4557.787234  
10,2,5443.027174  
10,2,5095.950000  
10,2,1587.588235  
10,2,2299.227679  
10,2,19940.082447  
10,2,2102.218750  
10,2,10892.666667  
10,2,6843.570175  
10,2,4522.392857  
10,2,1772.517857  
10,2,6665.618056  
10,2,2894.005319  
10,2,1831.312500  
10,2,7732.380682  
10,2,2451.375000  
10,2,4051.570312  
10,2,2018.640000  
10,2,6956.956522  
10,2,9205.820000  
10,2,7619.437500  
10,2,1835.583333  
10,2,5742.250000  
10,2,61953.972222  
10,2,3121.761905  
10,2,2134.075000  
10,2,1598.888889  
10,2,1748.685714

10,2,8248.420833  
10,2,3863.100543  
10,2,1771.415094  
10,2,4036.892857  
10,2,5316.344444  
10,2,3799.214286  
10,2,3263.678571  
10,2,5885.692308  
10,2,2564.349206  
10,2,4667.509091  
10,2,7021.546569  
10,2,1958.922222  
10,2,2127.468750  
10,2,2103.812500  
10,2,7446.367150  
10,2,1714.787234  
10,2,2973.480769  
10,2,1601.201923  
10,2,4352.374269  
10,2,2635.500000  
10,2,1874.575000  
10,2,2686.437500  
10,2,2340.193750  
10,2,18371.428571  
10,2,3378.657609  
10,2,4751.418033  
10,2,8670.505319  
10,2,11932.040201  
10,2,16568.758333  
10,2,5362.470588  
10,2,1665.446429  
10,2,2475.215909  
10,2,3575.905000  
10,2,7609.187500  
10,2,4785.685714  
10,2,2945.771739  
10,2,2090.050000  
10,2,2054.084821  
10,2,1573.276596  
10,2,2107.129310  
10,2,5293.625000  
10,2,3321.614362  
10,2,2643.668605  
10,2,1559.801630  
10,2,3432.182692  
10,2,4602.897727  
10,2,1586.524390  
10,2,5458.622642  
10,2,1559.133333  
10,2,4929.125000  
10,2,5515.687500  
10,2,9356.185864  
10,2,2265.512500  
10,2,3457.284722  
10,2,13403.270408  
10,2,4424.415816  
10,2,2202.477564  
10,2,5225.114130  
10,2,4249.252358  
10,2,1554.840426  
10,2,1887.414634  
10,2,2332.121951  
10,2,7248.732484  
10,2,2187.744565  
10,2,2498.310345  
10,2,2455.023256

10,2,5911.127907  
10,2,2064.750000  
10,2,2281.212871  
10,2,3998.250000  
10,2,2225.750000  
10,2,2508.160714  
10,2,5116.336066  
10,2,1751.317568  
10,2,7726.743243  
10,2,42131.357143  
10,2,2682.760638  
10,2,2826.662281  
10,2,3499.052500  
10,2,8695.517857  
10,2,5658.674528  
10,2,5589.872340  
10,2,2962.177500  
10,2,2239.500000  
10,2,4803.836364  
10,2,1793.316667  
10,2,2115.153846  
10,2,3427.440000  
10,2,3573.368902  
10,2,1626.416667  
10,2,2805.994444  
10,2,8725.883772  
10,2,2777.333333  
10,2,4025.535000  
10,2,2495.444444  
10,2,6314.198113  
10,2,7600.026316  
10,2,1549.187500  
10,2,6834.960526  
10,2,7572.677966  
10,2,15960.558333  
10,2,2377.225000  
10,2,1997.529762  
10,2,1918.285714  
10,2,3499.833333  
10,2,5473.161290  
10,2,4516.759146  
10,2,3542.538462  
10,2,5843.156915  
10,2,1950.716346  
10,2,1922.414894  
10,2,1928.664773  
10,2,10055.908163  
10,2,24963.115854  
10,2,36658.781250  
10,2,10158.108491  
10,2,7466.350000  
10,2,4830.922500  
10,2,1942.221649  
10,2,4640.142857  
10,2,2075.486842  
10,2,2576.250000  
10,2,2703.228814  
10,2,2068.906250  
10,2,2979.767857  
10,2,1503.666667  
10,2,2007.571429  
10,2,1898.891447  
10,2,2428.781250  
10,2,2616.670139  
10,2,2506.986486  
10,2,2195.343750

10,2,1925.144737  
10,2,5694.244565  
10,2,1861.851064  
10,2,3132.843085  
10,2,3561.912037  
10,2,2706.318182  
10,2,1689.331395  
10,2,3095.390244  
10,2,2610.912234  
10,2,2372.093750  
10,2,2653.813725  
10,2,4891.400000  
10,2,3220.129630  
10,2,3441.807292  
10,2,2029.673469  
10,2,5179.433673  
10,2,8853.725806  
10,2,2121.753378  
10,2,2660.805556  
10,2,1986.868243  
10,2,7696.414062  
10,2,5619.703488  
10,2,1606.584906  
10,2,2146.684211  
10,2,1842.560345  
10,2,3952.547170  
10,2,3465.068182  
10,2,1938.586538  
10,2,1961.612500  
10,2,1566.508523  
10,2,10143.740000  
10,2,1845.000000  
10,2,5770.106742  
10,2,8557.109649  
10,2,3565.331522  
10,2,2469.828947  
10,2,1521.792105  
10,2,1601.030612  
10,2,7250.226744  
10,2,5153.903125  
10,2,1776.000000  
10,2,6902.548913  
10,2,1542.968750  
10,2,2362.312500  
10,2,1840.053571  
10,2,22610.250000  
10,2,5761.755319  
10,2,9694.690909  
10,2,3013.356383  
10,2,2340.882075  
10,2,1602.150000  
10,2,3413.627232  
10,2,1797.857143  
10,2,2265.863636  
10,2,3258.125000  
10,2,2562.654891  
10,2,2631.465116  
10,2,6607.180851  
10,2,2121.417266  
10,2,1963.819712  
10,2,1543.374150  
10,2,2490.875000  
10,2,1890.000000  
10,2,2253.920455  
10,2,1874.948113  
10,2,10223.863636

10,2,1825.838542  
10,2,2750.740741  
10,2,2178.319079  
10,2,3951.446429  
10,2,2349.200658  
10,2,1595.782609  
10,2,15844.136364  
10,2,10020.659091  
10,2,1732.752809  
10,2,7341.402542  
10,2,2061.388889  
10,2,21098.351351  
10,2,4845.961538  
10,2,2420.488372  
10,2,1957.663462  
10,2,2259.090278  
10,2,3433.512195  
10,2,9011.635593  
10,2,3478.732143  
10,2,3159.337209  
10,2,3990.062500  
10,2,2750.528409  
10,2,6652.216667  
10,2,3302.382979  
10,2,1637.988095  
10,2,5890.666667  
10,2,2751.105000  
10,2,4151.088415  
10,2,2695.000000  
10,2,2443.459052  
10,2,5431.315789  
10,2,8919.340000  
10,2,3654.326531  
10,2,4881.615385  
10,2,4012.242009  
10,2,3399.786585  
10,2,3300.313725  
10,2,3583.493750  
10,2,5412.331897  
10,2,1787.728723  
10,2,4474.851190  
10,2,4111.556548  
10,2,6369.100000  
10,2,5864.627841  
10,2,2263.968085  
10,2,1600.416667  
10,2,3681.631757  
10,2,3950.865000  
10,2,4908.024038  
10,2,3923.394737  
10,2,1891.567568  
10,2,1926.247093  
10,2,1539.404255  
10,2,2061.924419  
10,2,1846.000000  
10,2,5459.630000  
10,2,1618.165000  
10,2,1851.165000  
10,2,4089.961538  
10,2,3139.775281  
10,2,5652.944444  
10,2,2685.292683  
10,2,3233.196429  
10,2,1893.095745  
10,2,3986.388889  
10,2,3608.740385

10,2,3131.085366  
10,2,1861.959239  
10,2,2411.312500  
10,2,2270.401786  
10,2,7711.375000  
10,2,5203.144231  
10,2,4891.900763  
10,2,1935.585366  
10,2,6376.375000  
10,2,8533.767544  
10,2,1519.826923  
10,2,13409.420213  
10,2,2223.594512  
10,2,1535.943182  
10,2,2766.217391  
10,2,1785.562500  
10,2,1943.632653  
10,2,4289.118421  
10,2,4541.186170  
10,2,3641.485294  
10,2,2432.385417  
10,2,5970.375000  
10,2,2695.037500  
10,2,2254.468750  
10,2,4467.390957  
10,2,1593.447368  
10,2,10291.302083  
10,2,2795.666667  
10,2,1746.750000  
10,2,1526.058824  
10,2,3202.050279  
10,2,5531.804348  
10,2,4393.050000  
10,2,1762.682927  
10,2,1730.879310  
10,2,2636.265625  
10,2,5372.866071  
10,2,7311.485294  
10,2,6466.890244  
10,2,5013.661017  
10,2,6081.075000  
10,2,1706.550000  
10,2,2584.735849  
10,2,2962.057927  
10,2,5632.692308  
10,2,1701.954545  
10,2,1905.228571  
10,2,2299.000000  
10,2,3003.712209  
10,2,5625.437500  
10,2,1666.581633  
10,2,4515.289216  
10,2,2334.039062  
10,2,3099.444196  
10,2,4425.158537  
10,2,1881.571875  
10,2,1816.111702  
10,2,5724.455882  
10,2,8045.046875  
10,2,2371.635135  
10,2,4752.316327  
10,2,2797.284211  
10,2,2343.341463  
10,2,1624.128205  
10,2,2124.437500  
10,2,1665.636364

10,2,3412.915094  
10,2,2957.162791  
10,2,2921.375000  
10,2,2532.000000  
10,2,4451.556122  
10,2,2004.505814  
10,2,1675.487179  
10,2,2081.598214  
10,2,3352.273438  
10,2,5366.235795  
10,2,3241.375000  
10,2,2438.312500  
10,2,1726.281250  
10,2,1820.312500  
10,2,6196.641304  
10,2,1696.786585  
10,2,4303.154639  
10,2,7536.320388  
10,2,1838.915663  
10,2,7364.101485  
10,2,8976.360000  
10,2,1822.038235  
10,2,5923.742857  
10,2,1563.310000  
10,2,2545.534884  
10,2,5817.159524  
10,2,3879.160714  
10,2,1501.333333  
10,2,1544.434211  
10,2,4586.309028  
10,2,3576.385204  
10,2,1635.000000  
10,2,4751.094595  
10,2,11521.915761  
10,2,1659.142857  
10,2,2591.046875  
10,2,3535.460000  
10,2,1756.664706  
10,2,2075.076923  
10,2,3839.421196  
10,2,3088.547872  
10,2,2210.235294  
10,2,1931.521875  
10,2,9772.337209  
10,2,5079.108333  
10,2,3213.215909  
10,2,1638.451220  
10,2,2425.377778  
10,2,3653.150943  
10,2,7247.993056  
10,2,2605.786585  
10,2,6868.500000  
10,2,4696.066964  
10,2,1638.531250  
10,2,2339.974490  
10,2,1917.656522  
10,2,2245.900000  
10,2,2184.223214  
10,2,2799.375000  
10,2,6581.119792  
10,2,6071.494186  
10,2,3530.613281  
10,2,3214.098039  
10,2,2605.994186  
10,2,7791.948980  
10,2,6020.963542

10,2,1753.677083  
10,2,1888.083333  
10,2,2815.713235  
10,2,6274.442130  
10,2,5917.125000  
10,2,3175.841146  
10,2,6411.500000  
10,2,16231.253521  
10,2,2804.722222  
10,2,6620.755435  
10,2,5389.132812  
10,2,10287.333333  
10,2,10734.500000  
10,2,6111.145833  
10,2,6090.677632  
10,2,1961.381579  
10,2,2015.776536  
10,2,3381.848684  
10,2,2298.163366  
10,2,2702.556701  
10,2,3752.364865  
10,2,3346.125000  
10,2,1803.037500  
10,2,1586.691667  
10,2,1657.684783  
10,2,6578.368421  
10,2,5527.464286  
10,2,2471.080000  
10,2,2890.480769  
10,2,2928.658654  
10,2,2069.762195  
10,2,7118.916667  
10,2,4883.670673  
10,2,1875.442308  
10,2,3608.851852  
10,2,3996.752273  
10,2,3836.698171  
10,2,3705.159091  
10,2,3725.000000  
10,2,2333.245283  
10,2,2347.017045  
10,2,3593.261111  
10,2,6178.275862  
10,2,1600.302326  
10,2,5386.668269  
10,2,5168.020408  
10,2,2550.144737  
10,2,3907.805556  
10,2,2727.790698  
10,2,2809.486111  
10,2,8268.285714  
10,2,1908.803571  
10,2,3813.440217  
10,2,2244.548387  
10,2,19359.857143  
10,2,1952.188776  
10,2,1890.734375  
10,2,5938.010050  
10,2,2182.747283  
10,2,1708.720000  
10,2,1678.750000  
10,2,4573.211207  
10,2,3791.750000  
10,2,2379.485465  
10,2,3603.190000  
10,2,1667.793103

10,2,5777.425532  
10,2,2898.976351  
10,2,1978.553030  
10,2,3658.000000  
10,2,2108.350000  
10,2,2585.318182  
10,2,11190.543919  
10,2,3694.569853  
10,2,2847.303191  
10,2,2654.892216  
10,2,2858.026042  
10,2,2868.653846  
10,2,1993.388298  
10,2,4364.457143  
10,2,1533.546218  
10,2,3416.777778  
10,2,1802.000000  
10,2,3457.553922  
10,2,2410.054348  
10,2,2114.911765  
10,2,4391.312500  
10,2,4373.606771  
10,2,2131.602941  
10,2,2432.594444  
10,2,8734.475610  
10,2,6323.483871  
10,2,5078.238372  
10,2,2402.887500  
10,2,14268.923913  
10,2,1897.807065  
10,2,1576.524390  
10,2,3994.039773  
10,2,2064.025510  
10,2,2156.558824  
10,2,12683.770833  
10,2,2222.045455  
10,2,1738.682927  
10,2,2740.575658  
10,2,10960.234848  
10,2,3851.513158  
10,2,4581.817708  
10,2,2640.750000  
10,2,2908.350962  
10,2,2496.131250  
10,2,3280.986486  
10,2,1736.323171  
10,2,1696.367347  
10,2,1679.636364  
10,2,1822.275510  
10,2,2575.322500  
10,2,4611.922414  
10,2,2604.141304  
10,2,1666.052326  
10,2,5382.512755  
10,2,3933.386935  
10,2,1789.028409  
10,2,3094.500000  
10,2,1510.816176  
10,2,1941.288462  
10,2,7809.745283  
10,2,1928.335106  
10,2,3254.306122  
10,2,5306.956000  
10,2,3739.458333  
10,2,7539.667373  
10,2,5104.146739

10,2,8914.825243  
10,2,3343.931034  
10,2,1739.885417  
10,2,4901.073298  
10,2,1546.190341  
10,2,3748.500000  
10,2,15763.137255  
10,2,5024.500000  
10,2,2802.132979  
10,2,2915.765306  
10,2,1872.596154  
10,2,1970.829787  
10,2,1963.945578  
10,2,3555.645729  
10,2,6363.456522  
10,2,2267.371094  
10,2,3339.246795  
10,2,3533.862981  
10,2,2599.000000  
10,2,2548.693182  
10,2,3806.342105  
10,2,4008.520408  
10,2,6540.725000  
10,2,2108.875000  
10,2,1596.625000  
10,2,10710.265306  
10,2,1944.946429  
10,2,3295.377232  
10,2,5599.447674  
10,2,3355.012821  
10,2,3210.976415  
10,2,2664.810811  
10,2,6514.520349  
10,2,4398.761905  
10,2,1671.416667  
10,2,3167.354167  
10,2,2105.995614  
10,2,2367.767442  
10,2,2933.493590  
10,2,2256.100000  
10,2,3947.134615  
10,2,1720.862500  
10,2,5763.166667  
10,2,2965.289474  
10,2,3050.733173  
10,2,3540.679245  
10,2,1551.295455  
10,2,2749.800000  
10,2,3693.687500  
10,2,2776.340782  
10,2,1499.676829  
10,2,2110.386503  
10,2,6280.921466  
10,2,1771.801546  
10,2,5834.343750  
10,2,2154.515625  
10,2,1869.720000  
10,2,2748.471698  
10,2,2913.521739  
10,2,1853.469101  
10,2,2614.646040  
10,2,3197.046512  
10,2,7395.507895  
10,2,4525.410714  
10,2,3469.556818  
10,2,1678.259804

10,2,3261.727273  
10,2,1592.398256  
10,2,7364.055556  
10,2,3153.387755  
10,2,1541.937500  
10,2,2770.754902  
10,2,2784.762755  
10,2,3154.485437  
10,2,3890.197674  
10,2,3469.194444  
10,2,2371.273256  
10,2,6951.579235  
10,2,2954.912234  
10,2,1634.678125  
10,2,3974.139205  
10,2,1938.107595  
10,2,2580.522843  
10,2,1756.095238  
10,2,2058.437500  
10,2,2234.744681  
10,2,1979.576923  
10,2,7877.168367  
10,2,2793.038674  
10,2,2171.902027  
10,2,2238.814815  
10,2,10233.154762  
10,2,4439.295213  
10,2,5986.551020  
10,2,5930.500000  
10,2,1918.871622  
10,2,9185.453488  
10,2,11859.105263  
10,2,4587.141827  
10,2,2868.863372  
10,2,1634.778846  
10,2,3222.645833  
10,2,5111.490385  
10,2,7454.781250  
10,2,8098.377778  
10,2,3036.703390  
10,2,11028.605932  
10,2,1737.414894  
10,2,1833.963542  
10,2,1888.702381  
10,2,1856.631098  
10,2,3618.208333  
10,2,2279.987437  
10,2,5488.304813  
10,2,1685.939189  
10,2,7259.455128  
10,2,7785.466346  
10,2,4609.391026  
10,2,2300.408784  
10,2,2274.000000  
10,2,3421.084746  
10,2,2138.911538  
10,2,1996.464286  
10,2,7224.856481  
10,2,4844.000000  
10,2,5000.465753  
10,2,2200.505495  
10,2,4412.662921  
10,2,1684.500000  
10,2,1504.255682  
10,2,5759.081140  
10,2,6853.324074

10,2,2273.642857  
10,2,2466.131579  
10,2,2565.294643  
10,2,6242.938596  
10,2,2106.780105  
10,2,3460.364583  
10,2,9247.053241  
10,2,1756.644737  
10,2,4586.294118  
10,2,5781.831081  
10,2,3303.078125  
10,2,1506.250000  
10,2,7802.312500  
10,2,5008.014706  
10,2,1557.714286  
10,2,1776.859375  
10,2,2207.579545  
10,2,4172.169643  
10,2,3076.238208  
10,2,1621.855978  
10,2,3403.703488  
10,2,1708.305233  
10,2,5248.474057  
10,2,2755.815217  
10,2,1504.500000  
10,2,6301.850000  
10,2,2903.078125  
10,2,1822.918367  
10,2,1653.913462  
10,2,3952.500000  
10,2,2368.726744  
10,2,4532.470745  
10,2,1869.062500  
10,2,11964.031915  
10,2,1928.875000  
10,2,1913.625000  
10,2,2598.453125  
10,2,2004.072674  
10,2,4612.826087  
10,2,3039.559748  
10,2,1806.702703  
10,2,4711.894231  
10,2,7174.914894  
10,2,2563.026316  
10,2,6667.108696  
10,2,1775.882353  
10,2,2652.270000  
10,2,4733.607500  
10,2,1511.081761  
10,2,1735.843137  
10,2,3884.054455  
10,2,1908.005435  
10,2,5080.869565  
10,2,3238.036585  
10,2,1669.692308  
10,2,2699.276316  
10,2,3553.285714  
10,2,1571.356707  
10,2,1503.327703  
10,2,7897.454545  
10,2,4352.655000  
10,2,10744.386364  
10,2,2031.269939  
10,2,3018.363636  
10,2,3420.978723  
10,2,4915.189286

10,2,2085.575581  
10,2,1701.890244  
10,2,2833.312500  
10,2,13474.851064  
10,2,4642.973684  
10,2,3461.875000  
10,2,1527.102941  
10,2,5263.593750  
10,2,4343.694444  
10,2,2685.858974  
10,2,1808.187500  
10,2,1732.750000  
10,2,1712.045918  
10,2,4791.939189  
10,2,1585.412162  
10,2,2011.739837  
10,2,2672.451807  
10,2,51771.510204  
10,2,5395.956221  
10,2,2048.114094  
10,2,1556.175000  
10,2,3574.144737  
10,2,4057.680556  
10,2,2426.400000  
10,2,5625.148585  
10,2,4073.364407  
10,2,2721.447917  
10,2,3272.028125  
10,2,10558.486842  
10,2,2209.267045  
10,2,3211.441860  
10,2,2408.500000  
10,2,1673.186047  
10,2,3068.427083  
10,2,2284.157143  
10,2,4183.801653  
10,2,3099.076923  
10,2,4664.226519  
10,2,28110.041667  
10,2,2218.870192  
10,2,2222.375000  
10,2,4576.443396  
10,2,3702.448980  
10,2,4105.205882  
10,2,3223.276442  
10,2,1524.733333  
10,2,39395.196429  
10,2,2173.534884  
10,2,1995.384615  
10,2,2420.888158  
10,2,3209.483871  
10,2,3433.380208  
10,2,2589.556604  
10,2,1661.765957  
10,2,1877.310897  
10,2,3670.833333  
10,2,2122.181818  
10,2,2507.036017  
10,2,4168.368056  
10,2,3301.976190  
10,2,2061.205882  
10,2,2292.836957  
10,2,7394.842105  
10,2,3321.779070  
10,2,1851.551546  
10,2,2016.192708

10,2,2796.338889  
10,2,6018.653061  
10,2,2336.933333  
10,2,8212.000000  
10,2,5301.246445  
10,2,7309.694444  
10,2,1877.191176  
10,2,4701.826087  
10,2,63653.377976  
10,2,2225.696809  
10,2,7351.500000  
10,2,3705.273256  
10,2,14197.043269  
10,2,9558.809524  
10,2,2386.276316  
10,2,3235.226190  
10,2,1733.231707  
10,2,2420.680851  
10,2,2821.825000  
10,2,1621.512821  
10,2,3057.643750  
10,2,2273.100000  
10,2,3315.328571  
10,2,14328.300000  
10,2,1511.567308  
10,2,2184.125000  
10,2,10352.144022  
10,2,2591.539062  
10,2,2507.113636  
10,2,1619.482558  
10,2,4505.825000  
10,2,4543.875000  
10,2,2318.681818  
10,2,4240.601974  
10,2,4021.636364  
10,2,1636.857143  
10,2,1761.058824  
10,2,1924.756410  
10,2,1861.592391  
10,2,4262.722222  
10,2,19583.989796  
10,2,2507.550000  
10,2,4845.756757  
10,2,1718.023256  
10,2,8119.000000  
10,2,8215.529255  
10,2,3439.259146  
10,2,1760.000000  
10,2,2972.689394  
10,2,2236.439024  
10,2,4766.197727  
10,2,22318.060000  
10,2,3161.723039  
10,2,2515.990000  
10,2,6243.950000  
10,2,1835.777439  
10,2,1865.237500  
10,2,5542.040541  
10,2,2355.541667  
10,2,1753.136628  
10,2,8894.618421  
10,2,3876.796875  
10,2,4022.311111  
10,2,1659.770833  
10,2,3849.493421  
10,2,2645.250000

10,2,6213.428571  
10,2,3868.591463  
10,2,6721.919492  
10,2,6440.354730  
10,2,3530.606383  
10,2,5413.241379  
10,2,3022.558824  
10,2,3108.775000  
10,2,7316.578947  
10,2,1752.745690  
10,2,4353.909091  
10,2,15050.031250  
10,2,8967.016667  
10,2,2856.750000  
10,2,2642.878378  
10,2,3985.000000  
10,2,5189.019608  
10,2,5349.554348  
10,2,2103.795732  
10,2,1782.000000  
10,2,3665.250000  
10,2,2769.830189  
10,2,1966.033333  
10,2,3549.398936  
10,2,4139.714286  
10,2,4177.927326  
10,2,2810.514388  
10,2,16347.369792  
10,2,3383.345455  
10,2,7972.777778  
10,2,1799.750000  
10,2,3404.270349  
10,2,5421.465116  
10,2,2786.196682  
10,2,1603.336538  
10,2,2095.466463  
10,2,1853.906863  
10,2,2591.146341  
10,2,1781.831395  
10,2,2319.020408  
10,2,1782.250000  
10,2,2162.937500  
10,2,1853.044355  
10,2,38926.403061  
10,2,2198.803571  
10,2,6575.508621  
10,2,1763.979167  
10,2,1913.076220  
10,2,7432.695652  
10,2,2177.625000  
10,2,2898.020270  
10,2,4830.987981  
10,2,3124.385870  
10,2,5480.015625  
10,2,3099.132812  
10,2,3079.105263  
10,2,5332.387500  
10,2,1651.478261  
10,2,1778.379902  
10,2,1833.696429  
10,2,2490.345238  
10,2,1873.197917  
10,2,6921.338816  
10,2,2271.535326  
10,2,3633.170213  
10,2,2336.960000

10,2,6824.961538  
10,2,1698.833333  
10,2,1563.688889  
10,2,2488.891827  
10,2,2544.127660  
10,2,2468.809783  
10,2,2449.413043  
10,2,1562.092857  
10,2,1611.967262  
10,2,6622.468750  
10,2,10327.851064  
10,2,3266.644444  
10,2,8841.102273  
10,2,3160.715164  
10,2,1980.750000  
10,2,4734.323370  
10,2,2913.137500  
10,2,6797.964286  
10,2,2032.000000  
10,2,2483.857143  
10,2,4129.601415  
10,2,5288.526316  
10,2,3144.553191  
10,2,3932.992021  
10,2,4150.256410  
10,2,2547.775000  
10,2,2753.180921  
10,2,3556.151042  
10,2,9664.357143  
10,2,1730.145833  
10,2,3602.792453  
10,2,3263.715909  
10,2,3173.505319  
10,2,7010.808962  
10,2,3806.950000  
10,2,13284.598214  
10,2,5934.173913  
10,2,1892.019231  
10,2,2446.462264  
10,2,2220.500000  
10,2,11850.322115  
10,2,3702.015625  
10,2,5103.502717  
10,2,2522.651042  
10,2,1825.800000  
10,2,5638.519397  
10,2,1727.157895  
10,2,1756.653061  
10,2,1894.936321  
10,2,4713.333333  
10,2,17625.782609  
10,2,2932.256250  
10,2,3337.990000  
10,2,1647.937500  
10,2,7771.050403  
10,2,4481.787234  
10,2,5091.119565  
10,2,1783.795918  
10,2,2331.391304  
10,2,2337.935000  
10,2,6956.845455  
10,2,5152.604651  
10,2,14004.440000  
10,2,2493.824818  
10,2,2022.968750  
10,2,7416.771875

10,2,1964.166667  
10,2,3141.128125  
10,2,2303.916230  
10,2,1706.761290  
10,2,1794.666667  
10,2,2297.578947  
10,2,6685.051724  
10,2,1661.493750  
10,2,9916.910256  
10,2,2505.064904  
10,2,2064.343750  
10,2,3983.278351  
10,2,5167.634615  
10,2,2165.858491  
10,2,3693.000000  
10,2,5487.219212  
10,2,1931.600000  
10,2,3801.578947  
10,2,1868.861486  
10,2,4984.333333  
10,2,3039.800000  
10,2,3825.786932  
10,2,2476.196429  
10,2,2984.494318  
10,2,1596.403846  
10,2,2649.776042  
10,2,5466.384615  
10,2,4623.997585  
10,2,8978.974432  
10,2,2287.811927  
10,2,3618.571429  
10,2,1988.550000  
10,2,5326.100000  
10,2,3398.990385  
10,2,1753.680921  
10,2,8121.391304  
10,2,2588.380319  
10,2,7650.890000  
10,2,2726.235294  
10,2,1718.636905  
10,2,4274.890244  
10,2,4124.537234  
10,2,1567.944444  
10,2,6042.065217  
10,2,7352.576613  
10,2,2955.865625  
10,2,5079.444444  
10,2,2600.900000  
10,2,3676.064516  
10,2,3934.618590  
10,2,14555.000000  
10,2,1900.236111  
10,2,2768.500000  
10,2,5347.846591  
10,2,2268.142857  
10,2,3367.508475  
10,2,10513.184524  
10,2,1517.763889  
10,2,8597.917614  
10,2,1547.575000  
10,2,2424.276316  
10,2,5166.877273  
10,2,4416.637255  
10,2,3638.278226  
10,2,3902.744048  
10,2,2580.812500

10,2,9898.223214  
10,2,10680.003049  
10,2,2296.150000  
10,2,2063.572917  
10,2,3241.804545  
10,2,4840.695652  
10,2,3103.265152  
10,2,2506.406250  
10,2,2298.789474  
10,2,2435.363095  
10,2,1600.450000  
10,2,3823.812500  
10,2,2140.661765  
10,2,6581.424342  
10,2,4657.532258  
10,2,1573.988372  
10,2,13172.289216  
10,2,5931.370833  
10,2,2338.791667  
10,2,1841.733333  
10,2,4835.881773  
10,2,2916.217391  
10,2,1574.071429  
10,2,1973.923077  
10,2,1904.215000  
10,2,2139.018293  
10,2,2585.562500  
10,2,2045.750000  
10,2,7283.906250  
10,2,5518.852273  
10,2,1731.272727  
10,2,6746.435000  
10,2,1671.886905  
10,2,1551.557432  
10,2,1539.750000  
10,2,1663.469388  
10,2,2481.322115  
10,2,4377.037736  
10,2,2829.879032  
10,2,2035.020833  
10,2,2290.195652  
10,2,3136.369318  
10,2,2333.875000  
10,2,7652.953804  
10,2,2845.893617  
10,2,16050.847826  
10,2,2839.934211  
10,2,1767.554878  
10,2,2738.533333  
10,2,2439.076923  
10,2,3264.520000  
10,2,2929.162281  
10,2,1971.330645  
10,2,2540.419643  
10,2,2519.918750  
10,2,2134.542857  
10,2,5246.589744  
10,2,3918.487421  
10,2,3651.702778  
10,2,1904.122340  
10,2,8436.353261  
10,2,5200.627451  
10,2,1548.284574  
10,2,2829.500000  
10,2,4354.769912  
10,2,2595.989011

10,2,1799.643750  
10,2,1549.089744  
10,2,2589.728261  
10,2,1875.318548  
10,2,1534.653846  
10,2,3098.360000  
10,2,3589.804348  
10,2,9275.895833  
10,2,98705.610795  
10,2,9458.971154  
10,2,37294.397059  
10,2,4318.294872  
10,2,32645.207547  
10,2,4722.500000  
10,2,2383.644444  
10,2,1726.180851  
10,2,2280.055556  
10,2,2709.934211  
10,2,3152.596154  
10,2,2212.262755  
10,2,2174.034091  
10,2,5920.341667  
10,2,60191.580556  
10,2,1951.875000  
10,2,4493.198980  
10,2,3003.859375  
10,2,2576.527778  
10,2,2514.500000  
10,2,7306.962963  
10,2,1867.149457  
10,2,11686.817073  
10,2,3622.744444  
10,2,1847.875000  
10,2,3325.096774  
10,2,6004.633929  
10,2,1514.567568  
10,2,5876.308036  
10,2,2240.068493  
10,2,2289.689815  
10,2,3834.500000  
10,2,3903.264205  
10,2,1900.112500  
10,2,1846.600610  
10,2,1605.220395  
10,2,3729.714286  
10,2,2293.312500  
10,2,2091.905000  
10,2,4143.250000  
10,2,2033.008523  
10,2,11830.384422  
10,2,3945.666667  
10,2,8380.150754  
10,2,1611.153846  
10,2,3023.403846  
10,2,1542.531250  
10,2,5919.477778  
10,2,3502.333333  
10,2,2069.332237  
10,2,1604.375000  
10,2,16715.007812  
10,2,11541.678010  
10,2,4225.879397  
10,2,1993.467949  
10,2,1938.200000  
10,2,3670.350000  
10,2,1777.127660

10,2,33720.695946  
10,2,2427.058511  
10,2,3920.966837  
10,2,2580.445652  
10,2,11446.745000  
10,2,2905.586957  
10,2,2168.367647  
10,2,22201.617021  
10,2,1499.230263  
10,2,8101.114583  
10,2,2508.348214  
10,2,1895.800595  
10,2,4475.340909  
10,2,3173.287500  
10,2,3210.842105  
10,2,1625.385870  
10,2,1735.673469  
10,2,2363.727273  
10,2,2536.388889  
10,2,1860.468750  
10,2,4309.581395  
10,2,3262.300000  
10,2,2405.483146  
10,2,5050.088710  
10,2,2037.892405  
10,2,1848.464286  
10,2,3719.111111  
10,2,2201.550000  
10,2,3415.678571  
10,2,5157.600000  
10,2,1680.250000  
10,2,1898.400000  
10,2,2040.430000  
10,2,5309.952381  
10,2,2988.244444  
10,2,6105.574468  
10,2,2510.093023  
10,2,4036.804020  
10,2,6908.344262  
10,2,2088.122222  
10,2,1616.714844  
10,2,1715.319048  
10,2,4985.086111  
10,2,3552.268229  
10,2,2747.615854  
10,2,3295.894737  
10,2,1981.333333  
10,2,5423.044811  
10,2,7414.918367  
10,2,4636.250000  
10,2,2478.781250  
10,2,2209.872340  
10,2,2388.081395  
10,2,2910.350000  
10,2,4160.307692  
10,2,5137.956633  
10,2,2247.613372  
10,2,1501.586207  
10,2,1858.500000  
10,2,4946.125874  
10,2,2263.909375  
10,2,4046.154255  
10,2,9773.447368  
10,2,1675.616279  
10,2,6802.035242  
10,2,5471.553922

10,2,1525.955882  
10,2,8398.911458  
10,2,6747.448864  
10,2,3024.447917  
10,2,3446.750000  
10,2,3358.335106  
10,2,2437.833333  
10,2,5075.488889  
10,2,5226.167683  
10,2,1955.875000  
10,2,1727.906250  
10,2,1746.833333  
10,2,1614.297619  
10,2,1574.298913  
10,2,3891.081633  
10,2,5667.746795  
10,2,4594.523026  
10,2,2648.040000  
10,2,1557.255319  
10,2,2880.848558  
10,2,8058.119565  
10,2,3761.810811  
10,2,2009.576389  
10,2,2069.156250  
10,2,16722.368852  
10,2,3999.747951  
10,2,11356.604478  
10,2,2538.241667  
10,2,1848.670213  
10,2,3764.044444  
10,2,1948.364865  
10,2,1642.442857  
10,2,1528.160714  
10,2,2307.227273  
10,2,2877.719512  
10,2,2053.044643  
10,2,1791.546875  
10,2,4426.605263  
10,2,2583.285714  
10,2,3567.487500  
10,2,2043.699405  
10,2,1774.447581  
10,2,1903.628049  
10,2,1575.455357  
10,2,1920.000000  
10,2,5274.611111  
10,2,3143.014706  
10,2,2733.924419  
10,2,12575.181818  
10,2,3487.152174  
10,2,10038.610577  
10,2,6354.918033  
10,2,8311.073864  
10,2,2464.739362  
10,2,3894.581522  
10,2,4548.510638  
10,2,36693.846154  
10,2,3089.333333  
10,2,3110.467391  
10,2,5035.487805  
10,2,2922.548077  
10,2,5628.509804  
10,2,4609.203947  
10,2,3223.220238  
10,2,3008.833333  
10,2,2104.614213

10,2,8758.676887  
10,2,1540.787037  
10,2,1795.940000  
10,2,1800.304348  
10,2,1863.464286  
10,2,2098.964286  
10,2,10888.653509  
10,2,4884.834135  
10,2,2063.729167  
10,2,3911.864865  
10,2,1757.350490  
10,2,4491.452703  
10,2,1653.220000  
10,2,3043.865385  
10,2,3650.379781  
10,2,5485.092500  
10,2,5317.594340  
10,2,1843.002907  
10,2,1724.068182  
10,2,3216.490854  
10,2,4697.103261  
10,2,3219.765306  
10,2,2160.244444  
10,2,9051.241206  
10,2,2859.869565  
10,2,6773.193182  
10,2,4831.298780  
10,2,2453.936224  
10,2,1747.900000  
10,2,19200.730469  
10,2,1612.969512  
10,2,20202.739286  
10,2,2239.246875  
10,2,3890.864865  
10,2,2367.128205  
10,2,2214.843750  
10,2,12284.508772  
10,2,2615.735294  
10,2,2439.957547  
10,2,3353.760000  
10,2,5440.426471  
10,2,1675.277778  
10,2,3411.786290  
10,2,5530.719298  
10,2,2982.130000  
10,2,1501.621622  
10,2,3211.846154  
10,2,2045.451613  
10,2,1536.288043  
10,2,1659.394737  
10,2,1847.453125  
10,2,3269.943182  
10,2,6180.718750  
10,2,3179.598958  
10,2,1642.852273  
10,2,2414.868750  
10,2,42099.452830  
10,2,1540.937500  
10,2,4818.134146  
10,2,15570.714286  
10,2,2027.849057  
10,2,5534.714286  
10,2,4876.593750  
10,2,1629.218750  
10,2,2198.627551  
10,2,3413.633721

10,2,3012.806250  
10,2,11705.786290  
10,2,8046.650000  
10,2,1723.588235  
10,2,5803.300000  
10,2,1574.591837  
10,2,2489.464286  
10,2,3118.625000  
10,2,3253.651042  
10,2,1559.539634  
10,2,3035.481707  
10,2,1863.666667  
10,2,4844.627907  
10,2,1578.804878  
10,2,2270.369898  
10,2,1863.419492  
10,2,3457.369792  
10,2,7250.707386  
10,2,1670.521277  
10,2,7800.143617  
10,2,2919.887755  
10,2,1788.534722  
10,2,2902.250000  
10,2,3148.500000  
10,2,3575.913136  
10,2,1512.134146  
10,2,1653.685393  
10,2,5898.528302  
10,2,9529.634615  
10,2,4213.477273  
10,2,4557.980000  
10,2,3309.765625  
10,2,3910.375000  
10,2,1521.634146  
10,2,2820.648148  
10,2,11650.050000  
10,2,8988.074561  
10,2,7510.323980  
10,2,1813.593750  
10,2,3640.352500  
10,2,8482.978723  
10,2,7208.312500  
10,2,6245.978723  
10,2,2759.225000  
10,2,1600.130952  
10,2,3261.661058  
10,2,2382.103659  
10,2,1642.212500  
10,2,2844.668605  
10,2,2718.839181  
10,2,2097.750000  
10,2,2808.784431  
10,2,2385.331126  
10,2,2173.687500  
10,2,1585.827128  
10,2,1721.176471  
10,2,3901.222222  
10,2,2466.625000  
10,2,2521.883721  
10,2,4376.441964  
10,2,8147.414634  
10,2,2430.939189  
10,2,22133.195513  
10,2,4426.684426  
10,2,2078.459239  
10,2,3155.187500

10,2,13997.304688  
10,2,2123.295918  
10,2,5165.982143  
10,2,2346.666667  
10,2,1553.980263  
10,2,2445.191489  
10,2,2687.238372  
10,2,5554.392157  
10,2,3559.004237  
10,2,2000.614583  
10,2,1566.250000  
10,2,1988.298077  
10,2,8332.125000  
10,2,2164.328947  
10,2,8153.071749  
10,2,9328.611413  
10,2,4787.282895  
10,2,3249.154762  
10,2,4836.750000  
10,2,3187.704545  
10,2,9516.583333  
10,2,1843.750000  
10,2,1526.320513  
10,2,2562.285714  
10,2,2842.035326  
10,2,2705.375000  
10,2,7097.256579  
10,2,4619.811321  
10,2,7829.051020  
10,2,3454.742647  
10,2,13699.670000  
10,2,2027.847561  
10,2,1747.021277  
10,2,2820.851064  
10,2,13114.900000  
10,2,1625.989796  
10,2,1740.729167  
10,2,7294.006410  
10,2,5165.663462  
10,2,6252.284091  
10,2,5793.620192  
10,2,5898.706395  
10,2,15929.707589  
10,2,5665.052083  
10,2,1500.744318  
10,2,15711.973214  
10,2,3344.739130  
10,2,2060.168605  
10,2,1747.179487  
10,2,2451.433333  
10,2,5137.292683  
10,2,8978.589552  
10,2,6921.488889  
10,2,1729.826923  
10,2,3791.627717  
10,2,2349.517442  
10,2,1590.939024  
10,2,5475.696023  
10,2,1814.800000  
10,2,3330.203704  
10,2,5819.769231  
10,2,4594.076220  
10,2,2548.247312  
10,2,3557.878125  
10,2,4422.339286  
10,2,2696.093023

10,2,5587.725000  
10,2,1547.130000  
10,2,2353.755952  
10,2,4544.412234  
10,2,2909.604167  
10,2,14735.525000  
10,2,4906.000000  
10,2,1774.987805  
10,2,3692.393617  
10,2,4501.085938  
10,2,4300.875000  
10,2,5880.033163  
10,2,1585.622093  
10,2,2250.928571  
10,2,1738.101064  
10,2,3501.638158  
10,2,1639.565789  
10,2,1811.697917  
10,2,5021.653061  
10,2,5291.304878  
10,2,9261.803279  
10,2,1564.271739  
10,2,5449.790123  
10,2,1820.410714  
10,2,2420.597938  
10,2,12302.509615  
10,2,7646.594262  
10,2,1797.508621  
10,2,11528.164352  
10,2,3491.991477  
10,2,3691.750000  
10,2,8178.709524  
10,2,29273.756757  
10,2,2169.371795  
10,2,3288.798077  
10,2,3214.833333  
10,2,11355.946429  
10,2,1804.975543  
10,2,3492.837500  
10,2,7998.125000  
10,2,1880.784884  
10,2,4725.687500  
10,2,3069.750000  
10,2,2518.518519  
10,2,1687.892857  
10,2,1701.655000  
10,2,4174.225000  
10,2,13093.140244  
10,2,3603.266447  
10,2,4974.395833  
10,2,2854.318627  
10,2,2662.694444  
10,2,2322.665865  
10,2,1769.670000  
10,2,4456.406863  
10,2,1845.837748  
10,2,2116.511574  
10,2,6136.339147  
10,2,2279.707500  
10,2,2603.859375  
10,2,17327.445122  
10,2,3122.080357  
10,2,2615.839286  
10,2,2384.312500  
10,2,1662.108974  
10,2,2631.648438

10,2,3365.422111  
10,2,21914.194079  
10,2,65984.270440  
10,2,1729.738462  
10,2,2013.946429  
10,2,3170.517241  
10,2,9701.722826  
10,2,2096.727273  
10,2,1588.880435  
10,2,2610.465909  
10,2,2898.159722  
10,2,3329.273936  
10,2,7865.063559  
10,2,3009.854730  
10,2,1764.314136  
10,2,1781.827778  
10,2,1743.111413  
10,2,2378.777174  
10,2,1738.037037  
10,2,1564.191011  
10,2,4037.238693  
10,2,2507.470109  
10,2,9624.982143  
10,2,3126.551887  
10,2,1780.125000  
10,2,2223.993902  
10,2,2046.595238  
10,2,6651.818627  
10,2,2248.405405  
10,2,2184.176020  
10,2,1672.598592  
10,2,2171.726415  
10,2,13723.641204  
10,2,2133.989130  
10,2,1718.187500  
10,2,1713.075000  
10,2,3576.068750  
10,2,2634.675000  
10,2,2136.860577  
10,2,3634.063830  
10,2,1883.755435  
10,2,2697.516447  
10,2,18734.807692  
10,2,6118.772959  
10,2,2797.534884  
10,2,2709.947500  
10,2,2590.773649  
10,2,1719.778646  
10,2,3654.894022  
10,2,2528.918367  
10,2,1912.900000  
10,2,2584.750000  
10,2,7140.892045  
10,2,10971.519737  
10,2,5884.317708  
10,2,2949.234043  
10,2,3175.931373  
10,2,2550.665541  
10,2,2477.375000  
10,2,5192.086957  
10,2,6635.900000  
10,2,2572.080000  
10,2,8738.162791  
10,2,3181.982143  
10,2,2301.409375  
10,2,12538.403846

10,2,8661.031250  
10,2,2031.145349  
10,2,5707.546875  
10,2,5045.274390  
10,2,1601.725000  
10,2,3973.668750  
10,2,4125.905612  
10,2,3825.027439  
10,2,2389.022959  
10,2,2501.510870  
10,2,1770.339744  
10,2,3097.562500  
10,2,2040.418367  
10,2,7377.194149  
10,2,2125.107143  
10,2,5470.592500  
10,2,3032.000000  
10,2,1754.612903  
10,2,2172.000000  
10,2,2821.187500  
10,2,8979.688679  
10,2,3199.191860  
10,2,2353.579268  
10,2,2905.535088  
10,2,3653.168367  
10,2,8425.281977  
10,2,6337.964286  
10,2,27138.250000  
10,2,3205.233333  
10,2,3082.091667  
10,2,2196.767857  
10,2,1780.043750  
10,2,1880.395833  
10,2,2512.608696  
10,2,1606.538043  
10,2,2436.835000  
10,2,3214.833333  
10,2,4367.160714  
10,2,1850.708661  
10,2,1803.725000  
10,2,1757.210526  
10,2,1567.786290  
10,2,4936.923077  
10,2,2070.804688  
10,2,4886.692708  
10,2,8880.567708  
10,2,3259.840000  
10,2,2052.371875  
10,2,2661.787179  
10,2,2065.013393  
10,2,4483.351351  
10,2,4257.500000  
10,2,1516.170213  
10,2,4284.230603  
10,2,2689.750000  
10,2,2458.493056  
10,2,1511.265625  
10,2,6456.027273  
10,2,23973.291667  
10,2,2697.000000  
10,2,2853.526316  
10,2,4275.670213  
10,2,3365.702381  
10,2,5944.880435  
10,2,2651.063830  
10,2,5916.063492

10,2,6240.977612  
10,2,7232.314286  
10,2,2607.919872  
10,2,4225.400000  
10,2,2687.274038  
10,2,1829.556931  
10,2,2380.696023  
10,2,2030.741071  
10,2,10362.551471  
10,2,7507.344828  
10,2,1828.026316  
10,2,15952.957547  
10,2,7471.406977  
10,2,4450.725962  
10,2,2804.750000  
10,2,8217.035714  
10,2,1574.772727  
10,2,1681.450000  
10,2,4336.673295  
10,2,14920.943396  
10,2,1832.114286  
10,2,1688.361111  
10,2,6296.352941  
10,2,2562.612245  
10,2,3301.022222  
10,2,2372.029255  
10,2,2461.628378  
10,2,3644.783784  
10,2,8305.046610  
10,2,2943.323529  
10,2,1508.791667  
10,2,1604.250000  
10,2,2837.207317  
10,2,3111.437500  
10,2,1916.089286  
10,2,5510.347500  
10,2,2864.078804  
10,2,33848.718750  
10,2,7948.064103  
10,2,2049.000000  
10,2,14586.625000  
10,2,2104.217172  
10,2,5992.250000  
10,2,1657.035714  
10,2,2992.560000  
10,2,2598.551887  
10,2,4545.703125  
10,2,2154.807692  
10,2,1574.037736  
10,2,4541.134615  
10,2,7874.433036  
10,2,1527.950658  
10,2,2321.461538  
10,2,5065.759615  
10,2,2336.690104  
10,2,2938.898810  
10,2,1740.857143  
10,2,3961.168269  
10,2,5728.481818  
10,2,4612.401316  
10,2,2019.416667  
10,2,3777.903846  
10,2,1928.666667  
10,2,2219.241279  
10,2,1882.842857  
10,2,2435.763514

10,2,1609.093750  
10,2,13678.500000  
10,2,3683.789216  
10,2,4528.554348  
10,2,5846.840278  
10,2,3158.437500  
10,2,2624.756098  
10,2,3174.722222  
10,2,9772.946429  
10,2,4338.530806  
10,2,2293.566667  
10,2,3578.125000  
10,2,6639.416667  
10,2,1544.131737  
10,2,1500.111111  
10,2,5167.662500  
10,2,3750.653846  
10,2,7552.535714  
10,2,2794.698864  
10,2,2065.611111  
10,2,2197.602041  
10,2,2105.333333  
10,2,1795.791667  
10,2,1674.500000  
10,2,4667.039063  
10,2,2545.897727  
10,2,2103.279255  
10,2,6501.290909  
10,2,2839.621429  
10,2,2112.787234  
10,2,3087.428571  
10,2,6365.460106  
10,2,3899.637500  
10,2,11052.859375  
10,2,1962.122283  
10,2,14445.478469  
10,2,2515.073171  
10,2,3071.471591  
10,2,6065.065574  
10,2,2313.905213  
10,2,3027.163043  
10,2,5506.705357  
10,2,4519.929348  
10,2,6623.576923  
10,2,5222.500000  
10,2,1499.261364  
10,2,6623.582500  
10,2,1864.825000  
10,2,2422.650888  
10,2,3737.388060  
10,2,2410.905660  
10,2,1911.357558  
10,2,1975.609756  
10,2,6767.914894  
10,2,4008.590909  
10,2,2736.090909  
10,2,5538.794872  
10,2,1835.812500  
10,2,1716.975000  
10,2,2833.848837  
10,2,2477.597973  
10,2,3437.125000  
10,2,2095.500000  
10,2,2209.160000  
10,2,3234.997449  
10,2,5823.031250

10,2,2333.132075  
10,2,3294.664474  
10,2,4917.943182  
10,2,2604.462500  
10,2,4059.122222  
10,2,7610.840000  
10,2,5034.445312  
10,2,1764.202703  
10,2,5479.413043  
10,2,3086.046610  
10,2,3273.231250  
10,2,3847.176471  
10,2,7985.117188  
10,2,6922.309783  
10,2,11456.622222  
10,2,2448.890957  
10,2,2213.108333  
10,2,3171.300000  
10,2,1647.617021  
10,2,2648.518293  
10,2,3008.187192  
10,2,1732.398810  
10,2,2810.750000  
10,2,5878.540816  
10,2,2110.750000  
10,2,2777.250000  
10,2,11343.666667  
10,2,1951.657143  
10,2,2445.896341  
10,2,5299.798883  
10,2,2495.557692  
10,2,7503.333333  
10,2,9899.363636  
10,2,2499.901042  
10,2,3202.024390  
10,2,5406.355769  
10,2,4817.400000  
10,2,2932.048780  
10,2,1933.604651  
10,2,9001.000000  
10,2,1606.109375  
10,2,11994.333333  
10,2,3624.173469  
10,2,1847.350000  
10,2,3138.685096  
10,2,1635.318182  
10,2,3846.723404  
10,2,1559.707317  
10,2,5612.101124  
10,2,15170.517857  
10,2,6238.473913  
10,2,5527.359375  
10,2,10888.715909  
10,2,1758.609756  
10,2,1545.851064  
10,2,9628.697674  
10,2,1507.250000  
10,2,22405.234848  
10,2,1593.862805  
10,2,2552.666667  
10,2,2823.212121  
10,2,5614.450000  
10,2,2099.883929  
10,2,2508.833333  
10,2,5611.121622  
10,2,2035.709459

10,2,5653.378378  
10,2,4293.808140  
10,2,1957.933962  
10,2,3390.950000  
10,2,3882.763889  
10,2,1730.841463  
10,2,2264.526042  
10,2,4731.550000  
10,2,2924.390957  
10,2,2242.315217  
10,2,9881.555556  
10,2,3596.283784  
10,2,2392.765957  
10,2,3013.332447  
10,2,15381.673913  
10,2,2006.786585  
10,2,5414.432432  
10,2,5872.440789  
10,2,9944.903302  
10,2,2362.962264  
10,2,2327.271277  
10,2,4046.512500  
10,2,3097.141447  
10,2,18474.656250  
10,2,4977.787234  
10,2,2775.258523  
10,2,5864.661017  
10,2,9054.965409  
10,2,5086.507212  
10,2,1752.583333  
10,2,15524.743590  
10,2,1755.281818  
10,2,3765.763158  
10,2,2568.750000  
10,2,1596.131098  
10,2,2784.538889  
10,2,5067.342391  
10,2,4941.538889  
10,2,2465.516892  
10,2,2427.181159  
10,2,2091.212766  
10,2,3342.045732  
10,2,7621.428879  
10,2,2562.505556  
10,2,1530.948980  
10,2,1686.148438  
10,2,6254.258929  
10,2,3442.175000  
10,2,2121.997283  
10,2,9667.765152  
10,2,2599.119565  
10,2,2401.565217  
10,2,1872.851064  
10,2,2674.298469  
10,2,5489.022831  
10,2,4379.236486  
10,2,1828.404762  
10,2,4585.206349  
10,2,5682.485294  
10,2,5696.854167  
10,2,3010.964286  
10,2,4061.742857  
10,2,2260.025641  
10,2,1794.045455  
10,2,1940.067308  
10,2,2211.822222

10,2,2360.517045  
10,2,2458.750000  
10,2,2933.335000  
10,2,1976.152778  
10,2,6557.590000  
10,2,7399.088942  
10,2,3857.853774  
10,2,1692.600000  
10,2,3875.308673  
10,2,4342.369565  
10,2,3323.826087  
10,2,1767.026786  
10,2,11911.590909  
10,2,4956.725000  
10,2,1832.917614  
10,2,2021.468750  
10,2,3054.712500  
10,2,2975.451923  
10,2,7978.000000  
10,2,4666.800000  
10,2,2296.986702  
10,2,4430.895833  
10,2,2818.710526  
10,2,2452.511364  
10,2,1622.343023  
10,2,2628.734375  
10,2,2091.192935  
10,2,3513.166667  
10,2,4008.530093  
10,2,1774.525000  
10,2,2246.875000  
10,2,4637.338235  
10,2,4090.244444  
10,2,2986.545455  
10,2,2625.748571  
10,2,1900.312500  
10,2,2935.205357  
10,2,9082.814286  
10,2,3568.026316  
10,2,5855.676471  
10,2,1848.351744  
10,2,2995.974490  
10,2,2753.200000  
10,2,1918.632653  
10,2,1761.453488  
10,2,2246.625000  
10,2,2407.693750  
10,2,13658.842857  
10,2,4337.500000  
10,2,3495.363057  
10,2,5845.322034  
10,2,7190.395349  
10,2,4450.069767  
10,2,2156.083333  
10,2,6432.925481  
10,2,2477.923077  
10,2,4556.421569  
10,2,5812.658537  
10,2,6682.428977  
10,2,3437.467391  
10,2,3931.080882  
10,2,3365.772059  
10,2,4658.995283  
10,2,1551.489796  
10,2,2413.302326  
10,2,3470.313953

10,2,2132.009259  
10,2,2018.558824  
10,2,3449.165094  
10,2,1950.647959  
10,2,3012.000000  
10,2,1905.428571  
10,2,14544.965116  
10,2,4359.378049  
10,2,2474.743590  
10,2,1906.502874  
10,2,2336.129412  
10,2,4531.000000  
10,2,2434.240854  
10,2,1673.733696  
10,2,2228.428571  
10,2,4667.347826  
10,2,9498.466667  
10,2,2285.103261  
10,2,3897.259434  
10,2,5613.747596  
10,2,1880.402273  
10,2,3980.437500  
10,2,3059.654255  
10,2,2146.375000  
10,2,1735.011905  
10,2,7353.591837  
10,2,2129.994186  
10,2,5898.375000  
10,2,5841.907609  
10,2,2076.045977  
10,2,2386.697368  
10,2,28603.738636  
10,2,1665.333333  
10,2,2098.033333  
10,2,4956.066327  
10,2,6351.601852  
10,2,1950.430233  
10,2,3378.259615  
10,2,1858.870370  
10,2,7500.083333  
10,2,2015.826923  
10,2,2642.674419  
10,2,8406.143750  
10,2,4377.916667  
10,2,2159.377358  
10,2,3600.575472  
10,2,2045.185811  
10,2,6882.535176  
10,2,4732.450000  
10,2,10127.311475  
10,2,4853.153846  
10,2,8428.688679  
10,2,2871.875000  
10,2,2623.000000  
10,2,1759.486842  
10,2,8255.225490  
10,2,9930.616071  
10,2,3702.412162  
10,2,2638.931373  
10,2,1528.202703  
10,2,5567.742857  
10,2,6540.426471  
10,2,2602.000000  
10,2,1695.451087  
10,2,77024.468750  
10,2,1776.142012

10,2,7708.320675  
10,2,10907.765086  
10,2,12946.687500  
10,2,4805.500000  
10,2,2140.579787  
10,2,1613.776596  
10,2,2386.847561  
10,2,1931.458333  
10,2,6852.489796  
10,2,7517.550000  
10,2,3570.322581  
10,2,2901.985294  
10,2,2072.000000  
10,2,5103.771277  
10,2,5000.293103  
10,2,2305.487805  
10,2,5620.358209  
10,2,4022.360577  
10,2,2454.638514  
10,2,1705.267857  
10,2,3829.202500  
10,2,1516.069767  
10,2,1638.215278  
10,2,4234.276316  
10,2,3370.106383  
10,2,3578.730769  
10,2,2394.829268  
10,2,5024.471366  
10,2,3969.734756  
10,2,1858.836066  
10,2,2171.955307  
10,2,6662.949721  
10,2,2951.545894  
10,2,8485.102564  
10,2,7670.041451  
10,2,2504.950980  
10,2,5420.107143  
10,2,2642.368421  
10,2,2182.396226  
10,2,2125.889286  
10,2,3624.399457  
10,2,2521.780612  
10,2,2580.461310  
10,2,2928.391667  
10,2,4170.436170  
10,2,1802.729730  
10,2,1606.781915  
10,2,3027.206081  
10,2,1908.426136  
10,2,4796.012821  
10,2,1531.937500  
10,2,9955.664894  
10,2,1626.538462  
10,2,9712.776596  
10,2,1730.101399  
10,2,1691.500000  
10,2,2966.562500  
10,2,2407.288660  
10,2,3885.422500  
10,2,2632.176101  
10,2,1704.955128  
10,2,4754.922170  
10,2,7996.636364  
10,2,2445.257143  
10,2,2692.478723  
10,2,2408.204380

10,2,2496.000000  
10,2,6747.281250  
10,2,4149.155556  
10,2,2592.361413  
10,2,3867.012500  
10,2,5998.926887  
10,2,5299.211111  
10,2,4096.090000  
10,2,3252.025000  
10,2,2223.115625  
10,2,2578.622500  
10,2,2937.637931  
10,2,2018.500000  
10,2,3177.582386  
10,2,2025.782609  
10,2,5863.439189  
10,2,1604.502717  
10,2,3058.729730  
10,2,2218.036585  
10,2,4967.011905  
10,2,1788.035533  
10,2,6567.563636  
10,2,2691.434286  
10,2,4755.110577  
10,2,2494.155689  
10,2,1681.058480  
10,2,2101.968750  
10,2,2070.012195  
10,2,4493.935000  
10,2,5257.996711  
10,2,4626.677885  
10,2,14398.933824  
10,2,1605.668605  
10,2,1709.836538  
10,2,5474.034884  
10,2,3311.447368  
10,2,2312.494318  
10,2,1626.454545  
10,2,11895.612179  
10,2,2734.763889  
10,2,2834.726695  
10,2,3747.094512  
10,2,1907.517361  
10,2,2086.986842  
10,2,4030.096591  
10,2,1971.239583  
10,2,5301.285714  
10,2,3588.694444  
10,2,2121.277027  
10,2,2091.156250  
10,2,4639.268750  
10,2,1661.510204  
10,2,2090.732143  
10,2,2997.206250  
10,2,3899.415000  
10,2,2074.526316  
10,2,1505.758929  
10,2,3261.612179  
10,2,4287.088889  
10,2,2350.437500  
10,2,2633.198718  
10,2,2044.923077  
10,2,5075.171053  
10,2,5054.482143  
10,2,4039.375000  
10,2,5828.803571

10,2,5012.116279  
10,2,4381.454106  
10,2,4559.916256  
10,2,2908.523316  
10,2,1831.375000  
10,2,5206.550000  
10,2,2670.072500  
10,2,2022.010417  
10,2,1913.774390  
10,2,5197.833333  
10,2,10808.041667  
10,2,2287.092391  
10,2,3560.000000  
10,2,1593.532895  
10,2,4423.393939  
10,2,12376.125000  
10,2,8796.058824  
10,2,1556.800000  
10,2,2249.385417  
10,2,3896.591837  
10,2,2358.119565  
10,2,2416.487805  
10,2,6372.861650  
10,2,1772.636364  
10,2,3581.728261  
10,2,3748.397727  
10,2,1898.198324  
10,2,18048.136364  
10,2,6474.609442  
10,2,1918.300676  
10,2,2743.064904  
10,2,9530.444444  
10,2,5330.714286  
10,2,1638.656250  
10,2,27445.767857  
10,2,2031.953125  
10,2,1685.994505  
10,2,3110.304487  
10,2,5074.378049  
10,2,2397.869565  
10,2,3367.398438  
10,2,3382.494792  
10,2,1937.894444  
10,2,1827.735849  
10,2,1788.012195  
10,2,2467.062500  
10,2,10033.691964  
10,2,1653.550000  
10,2,1766.097561  
10,2,4212.100410  
10,2,3252.694149  
10,2,2320.319149  
10,2,5651.038265  
10,2,2098.880435  
10,2,2967.559211  
10,2,2519.002475  
10,2,4675.770270  
10,2,1689.578947  
10,2,4207.576220  
10,2,6027.055288  
10,2,11537.512755  
10,2,2281.454545  
10,2,5306.923077  
10,2,2592.411765  
10,2,3493.522727  
10,2,15777.714286

10,2,3845.178571  
10,2,14105.875000  
10,2,1911.586735  
10,2,3852.321429  
10,2,8556.562500  
10,2,2189.914894  
10,2,4807.187500  
10,2,3867.656250  
10,2,3119.205882  
10,2,2407.028646  
10,2,6330.166667  
10,2,7607.357143  
10,2,1940.475000  
10,2,7150.964286  
10,2,1510.935484  
10,2,3388.660377  
10,2,4494.788043  
10,2,5151.151163  
10,2,3137.133333  
10,2,5022.102273  
10,2,3139.078125  
10,2,7163.991279  
10,2,4721.340426  
10,2,10086.877660  
10,2,1704.760000  
10,2,3694.515625  
10,2,1992.292683  
10,2,7829.894444  
10,2,3712.287234  
10,2,1585.600000  
10,2,6233.723404  
10,2,3475.988971  
10,2,2224.775000  
10,2,3776.233491  
10,2,2664.572917  
10,2,54820.092949  
10,2,2905.011111  
10,2,5799.708333  
10,2,1554.292683  
10,2,2366.807927  
10,2,2589.004739  
10,2,3478.867188  
10,2,1746.614362  
10,2,1792.987805  
10,2,7294.666667  
10,2,2886.412500  
10,2,3011.673780  
10,2,6249.209302  
10,2,2707.375000  
10,2,9137.343750  
10,2,3243.128205  
10,2,1762.571023  
10,2,2717.819853  
10,2,2984.728723  
10,2,3485.747222  
10,2,2787.880000  
10,2,7933.202703  
10,2,9588.010714  
10,2,1928.902439  
10,2,2747.565000  
10,2,2408.528409  
10,2,5889.795918  
10,2,3937.420732  
10,2,12200.619318  
10,2,3638.862500  
10,2,1621.000000

10,2,1813.250000  
10,2,6619.415842  
10,2,3366.044872  
10,2,40282.127404  
10,2,9454.375000  
10,2,1596.735714  
10,2,1557.378378  
10,2,2699.103261  
10,2,5924.731250  
10,2,1687.488304  
10,2,1784.405405  
10,2,1824.861607  
10,2,1565.845745  
10,2,5793.060976  
10,2,2120.814286  
10,2,2364.691176  
10,2,2976.625000  
10,2,2747.630952  
10,2,2045.750000  
10,2,3195.375000  
10,2,2657.961538  
10,2,3704.088942  
10,2,4899.418605  
10,2,1777.361111  
10,2,3387.833333  
10,2,9687.888889  
10,2,4275.636792  
10,2,5863.405488  
10,2,3357.658333  
10,2,1812.500000  
10,2,2760.613260  
10,2,2806.538860  
10,2,8580.791829  
10,2,4456.363636  
10,2,3245.788462  
10,2,4619.365854  
10,2,1758.103723  
10,2,3683.818750  
10,2,2947.125000  
10,2,5143.343137  
10,2,2669.760000  
10,2,6940.821875  
10,2,3080.607143  
10,2,3317.574468  
10,2,1844.092105  
10,2,4119.872340  
10,2,2323.066667  
10,2,1979.455357  
10,2,8640.750000  
10,2,2152.870968  
10,2,3652.302326  
10,2,1654.841216  
10,2,5212.402174  
10,2,1574.465909  
10,2,1624.104651  
10,2,7978.600000  
10,2,3299.850000  
10,2,3113.399194  
10,2,1802.322368  
10,2,1530.842105  
10,2,1553.664634  
10,2,1960.277778  
10,2,1705.312500  
10,2,1852.887417  
10,2,2285.500000  
10,2,3090.053571

10,2,5530.682692  
10,2,2711.447222  
10,2,4760.211957  
10,2,4564.712500  
10,2,4404.205128  
10,2,4251.334375  
10,2,4911.137821  
10,2,1849.947368  
10,2,3123.568182  
10,2,2429.710784  
10,2,3609.629630  
10,2,1988.742857  
10,2,2145.642857  
10,2,3042.704082  
10,2,1939.611111  
10,2,2554.302885  
10,2,4374.177778  
10,2,2969.600543  
10,2,2810.191860  
10,2,7082.755435  
10,2,7161.000000  
10,2,3296.678571  
10,2,2749.972222  
10,2,3836.804878  
10,2,1711.568750  
10,2,6553.037234  
10,2,3040.680851  
10,2,1647.862500  
10,2,1540.529255  
10,2,2251.777027  
10,2,1681.082237  
10,2,1690.403846  
10,2,2466.397959  
10,2,1938.682292  
10,2,9706.343750  
10,2,10819.781818  
10,2,2000.950893  
10,2,2543.997159  
10,2,2709.105000  
10,2,2562.108374  
10,2,4624.796407  
10,2,6948.517442  
10,2,6954.322581  
10,2,3540.416667  
10,2,2965.419118  
10,2,11435.656977  
10,2,2750.588889  
10,2,10963.571429  
10,2,6972.840426  
10,2,2066.500000  
10,2,5312.464286  
10,2,2323.388889  
10,2,5824.937500  
10,2,9713.101562  
10,2,1823.351064  
10,2,1529.253472  
10,2,1831.451389  
10,2,2518.054054  
10,2,2482.076923  
10,2,2190.037736  
10,2,1932.522727  
10,2,3506.430288  
10,2,22491.585366  
10,2,1857.914062  
10,2,1929.904412  
10,2,2591.454545

10,2,3921.280660  
10,2,3416.305000  
10,2,3156.507576  
10,2,2343.553299  
10,2,1967.367021  
10,2,2395.925287  
10,2,4691.043478  
10,2,10802.402116  
10,2,20424.987069  
10,2,6248.573864  
10,2,3776.477273  
10,2,5608.539216  
10,2,2468.858696  
10,2,4017.993056  
10,2,1990.723958  
10,2,3105.837209  
10,2,1756.180556  
10,2,1778.721154  
10,2,3558.839286  
10,2,4267.250000  
10,2,2170.410714  
10,2,4162.867925  
10,2,1501.211957  
10,2,1594.896552  
10,2,2020.532609  
10,2,1937.957219  
10,2,3173.536649  
10,2,3464.830189  
10,2,3791.031250  
10,2,11110.946429  
10,2,1518.312500  
10,2,13858.543269  
10,2,2005.465116  
10,2,10737.756757  
10,2,7175.821429  
10,2,2629.562500  
10,2,10440.881250  
10,2,7120.512821  
10,2,2034.764706  
10,2,29021.216216  
10,2,2457.181034  
10,2,10424.518293  
10,2,3646.154070  
10,2,17053.829268  
10,2,10749.291667  
10,2,1838.900862  
10,2,1553.954286  
10,2,3515.566667  
10,2,1696.746711  
10,2,2050.315476  
10,2,2128.059211  
10,2,1920.163043  
10,2,7431.908333  
10,2,3291.971154  
10,2,3366.948052  
10,2,6109.403125  
10,2,2472.084337  
10,2,2462.125000  
10,2,1750.099490  
10,2,3087.152778  
10,2,2733.625000  
10,2,2467.111111  
10,2,2821.726190  
10,2,8576.826923  
10,2,1744.086735  
10,2,3307.265625

10,2,1656.848837  
10,2,2150.000000  
10,2,2250.875000  
10,2,2406.792553  
10,2,9462.857843  
10,2,8108.493590  
10,2,8118.777778  
10,2,1959.566327  
10,2,1845.604592  
10,2,2853.927885  
10,2,2643.086592  
10,2,2326.005208  
10,2,2219.172775  
10,2,41754.797222  
10,2,2062.878641  
10,2,5512.666667  
10,2,4477.303571  
10,2,2049.385135  
10,2,1726.554054  
10,2,2622.706250  
10,2,20182.939024  
10,2,2705.697368  
10,2,1722.272727  
10,2,2340.666667  
10,2,2153.057143  
10,2,13389.502907  
10,2,4604.562500  
10,2,9953.327273  
10,2,2445.450980  
10,2,3718.834239  
10,2,2157.159574  
10,2,2067.220430  
10,2,2695.892857  
10,2,4446.796875  
10,2,5157.636364  
10,2,4487.412500  
10,2,2365.016026  
10,2,6652.509146  
10,2,2382.693182  
10,2,6936.958333  
10,2,1549.383929  
10,2,2450.483696  
10,2,3092.536885  
10,2,1608.782051  
10,2,4443.055556  
10,2,4455.428571  
10,2,6063.695122  
10,2,7387.181818  
10,2,1536.809211  
10,2,2216.680628  
10,2,3152.742021  
10,2,4220.011628  
10,2,2233.500000  
10,2,3279.915541  
10,2,1933.692308  
10,2,2195.816667  
10,2,2486.875000  
10,2,1878.492647  
10,2,1510.348684  
10,2,4619.227273  
10,2,6066.928571  
10,2,3974.763158  
10,2,3133.118750  
10,2,2483.619048  
10,2,3904.096591  
10,2,7287.727273

10,2,3120.218750  
10,2,2683.113636  
10,2,2015.850000  
10,2,5497.916667  
10,2,1500.763158  
10,2,3334.853659  
10,2,4020.675000  
10,2,3980.889535  
10,2,7622.140000  
10,2,4266.096354  
10,2,1668.510417  
10,2,4565.301136  
10,2,1764.291667  
10,2,3223.983051  
10,2,4237.627660  
10,2,2578.750000  
10,2,4305.352941  
10,2,2955.421233  
10,2,4100.585227  
10,2,2012.698113  
10,2,2094.968750  
10,2,93333.272500  
10,2,4756.240132  
10,2,1581.073171  
10,2,1714.356383  
10,2,2390.850000  
10,2,1808.430348  
10,2,3570.772059  
10,2,3665.475000  
10,2,2338.767857  
10,2,3707.176471  
10,2,1955.750000  
10,2,2504.117021  
10,2,2913.600000  
10,2,4194.979592  
10,2,3172.357143  
10,2,4682.963235  
10,2,1744.662500  
10,2,2684.482143  
10,2,1869.822034  
10,2,2879.047619  
10,2,8187.150000  
10,2,2921.000000  
10,2,4074.375000  
10,2,1820.192308  
10,2,1507.692308  
10,2,2407.500000  
10,2,3314.018182  
10,2,1871.607955  
10,2,1661.791925  
10,2,3172.761364  
10,2,7507.182500  
10,2,5105.669811  
10,2,2869.526316  
10,2,3043.205128  
10,2,4282.739362  
10,2,2055.565217  
10,2,9104.734597  
10,2,1985.012712  
10,2,5316.919872  
10,2,2217.358974  
10,2,2629.138021  
10,2,2490.965909  
10,2,1671.742857  
10,2,1624.468750  
10,2,24299.437500

10,2,2898.181548  
10,2,2476.875000  
10,2,1606.390625  
10,2,5963.097561  
10,2,4992.024390  
10,2,1684.776163  
10,2,2468.160256  
10,2,6565.540000  
10,2,3352.552632  
10,2,4198.750000  
10,2,18060.000000  
10,2,7347.538462  
10,2,2279.095745  
10,2,7158.933673  
10,2,2558.805147  
10,2,3545.270270  
10,2,9872.623106  
10,2,3876.331250  
10,2,3194.510870  
10,2,3720.823171  
10,2,1798.531915  
10,2,1519.533784  
10,2,2091.575000  
10,2,3153.912736  
10,2,2801.421875  
10,2,1948.057065  
10,2,6143.445455  
10,2,3123.962500  
10,2,1533.558511  
10,2,6373.262821  
10,2,2331.594595  
10,2,8655.002451  
10,2,3122.773256  
10,2,3015.727273  
10,2,3843.312500  
10,2,3652.310811  
10,2,2990.333333  
10,2,7141.782895  
10,2,2386.255814  
10,2,4831.708333  
10,2,1592.208333  
10,2,14942.948980  
10,2,3638.531250  
10,2,2203.769886  
10,2,2170.968750  
10,2,1679.812500  
10,2,5067.762500  
10,2,2341.243902  
10,2,4495.279891  
10,2,2041.477778  
10,2,1554.531250  
10,2,2240.457447  
10,2,4334.643750  
10,2,34537.589744  
10,2,1592.664286  
10,2,5799.957447  
10,2,2624.628788  
10,2,2675.741848  
10,2,1735.020349  
10,2,4226.934783  
10,2,6721.371212  
10,2,4270.955000  
10,2,1915.212766  
10,2,3368.431373  
10,2,1828.622222  
10,2,2843.579787

10,2,2447.422170  
10,2,9370.882353  
10,2,6958.240854  
10,2,1947.189655  
10,2,1711.197917  
10,2,1617.378289  
10,2,1555.757812  
10,2,1713.000000  
10,2,1853.182143  
10,2,4361.666667  
10,2,2503.550000  
10,2,3192.715686  
10,2,8131.288889  
10,2,2390.382353  
10,2,20106.811224  
10,2,1589.104167  
10,2,1525.447368  
10,2,2127.026316  
10,2,6960.697674  
10,2,2705.305288  
10,2,5042.396739  
10,2,1693.494792  
10,2,1610.411458  
10,2,3659.687500  
10,2,2750.740385  
10,2,1575.551282  
10,2,3553.964286  
10,2,41914.375000  
10,2,4241.548077  
10,2,2526.808673  
10,2,1791.836538  
10,2,5422.684659  
10,2,4795.513587  
10,2,3088.625000  
10,2,8960.432432  
10,2,4399.625000  
10,2,7556.733333  
10,2,4906.103125  
10,2,2041.666667  
10,2,1640.769231  
10,2,3065.760000  
10,2,2549.156250  
10,2,5261.214286  
10,2,4260.938830  
10,2,9096.014151  
10,2,4748.000000  
10,2,3028.135922  
10,2,2615.100000  
10,2,4797.755102  
10,2,8991.425847  
10,2,4749.583333  
10,2,1655.685897  
10,2,2094.697674  
10,2,2268.956395  
10,2,1976.980978  
10,2,2006.512500  
10,2,7059.229730  
10,2,2798.789474  
10,2,2625.021277  
10,2,2511.214286  
10,2,2661.895349  
10,2,3535.208333  
10,2,3858.232955  
10,2,6203.886905  
10,2,4244.800000  
10,2,4062.428571

10,2,3377.340116  
10,2,2110.788043  
10,2,2147.441327  
10,2,2875.384615  
10,2,5755.816667  
10,2,4333.012931  
10,2,6902.677778  
10,2,2188.121622  
10,2,2053.461538  
10,2,2054.169355  
10,2,3863.041667  
10,2,2182.404605  
10,2,1719.846386  
10,2,2470.888889  
10,2,8771.769231  
10,2,1817.565217  
10,2,1603.750000  
10,2,4504.754808  
10,2,1768.621622  
10,2,1693.353448  
10,2,6800.377358  
10,2,6170.076923  
10,2,2303.965909  
10,2,3335.052632  
10,2,5106.625000  
10,2,4816.463415  
10,2,2324.527094  
10,2,1531.416667  
10,2,8136.072464  
10,2,1545.746324  
10,2,2572.804348  
10,2,2266.000000  
10,2,1641.425000  
10,2,5501.851351  
10,2,9966.351759  
10,2,1639.216346  
10,2,2112.935976  
10,2,9521.384615  
10,2,2643.792683  
10,2,1676.100000  
10,2,3957.109375  
10,2,4643.406250  
10,2,1914.968750  
10,2,2299.180851  
10,2,3194.257143  
10,2,1736.974265  
10,2,6175.280788  
10,2,6416.153846  
10,2,12895.930233  
10,2,3372.503049  
10,2,1528.926829  
10,2,3093.567568  
10,2,6927.695652  
10,2,2781.341463  
10,2,15341.509709  
10,2,5912.868421  
10,2,2031.987805  
10,2,17970.232143  
10,2,4223.723684  
10,2,2453.736842  
10,2,4930.340909  
10,2,5772.947115  
10,2,5907.625000  
10,2,2258.244898  
10,2,1706.230769  
10,2,3005.275000

10,2,3123.520000  
10,2,2905.482143  
10,2,2188.931818  
10,2,9371.036585  
10,2,2860.037500  
10,2,1887.343750  
10,2,11380.388158  
10,2,3747.410000  
10,2,20253.232558  
10,2,2709.090406  
10,2,7494.913043  
10,2,4861.963235  
10,2,4004.152344  
10,2,3323.333333  
10,2,4595.405556  
10,2,4173.166667  
10,2,1659.928571  
10,2,5885.433824  
10,2,4734.278061  
10,2,1522.028846  
10,2,1545.973684  
10,2,1541.026316  
10,2,3487.772727  
10,2,2697.493902  
10,2,2378.072222  
10,2,4102.151961  
10,2,2909.016026  
10,2,6913.065476  
10,2,2076.309659  
10,2,4063.325000  
10,2,2807.066667  
10,2,2825.026042  
10,2,3511.430000  
10,2,5886.960227  
10,2,6663.105000  
10,2,4248.551829  
10,2,2905.450292  
10,2,3690.962766  
10,2,8998.495614  
10,2,1892.411765  
10,2,5025.031250  
10,2,7341.505682  
10,2,61611.535714  
10,2,5298.875000  
10,2,2417.600000  
10,2,3399.677885  
10,2,3440.529412  
10,2,8688.063953  
10,2,9644.901163  
10,2,2589.331250  
10,2,2983.872549  
10,2,2362.228659  
10,2,3770.500000  
10,2,5124.175926  
10,2,5753.639053  
10,2,4200.230769  
10,2,3403.619318  
10,2,1534.394231  
10,2,3960.015957  
10,2,3211.672414  
10,2,5342.793478  
10,2,7209.096698  
10,2,4229.544355  
10,2,3781.508065  
10,2,2918.381410  
10,2,2998.804688

10,2,2259.000000  
10,2,1533.627854  
10,2,1710.889881  
10,2,3885.323171  
10,2,2002.520408  
10,2,8038.781250  
10,2,3254.604592  
10,2,3269.002358  
10,2,7755.631579  
10,2,4332.242424  
10,2,1753.875000  
10,2,4509.122549  
10,2,4802.534884  
10,2,4541.187500  
10,2,2681.489796  
10,2,1826.000000  
10,2,9671.709302  
10,2,5713.703488  
10,2,4935.307692  
10,2,2506.825472  
10,2,1607.850299  
10,2,2637.663265  
10,2,3688.112500  
10,2,2380.484848  
10,2,1588.875000  
10,2,3245.325581  
10,2,8916.055556  
10,2,25037.387195  
10,2,1612.646739  
10,2,5462.717949  
10,2,1856.747283  
10,2,2027.176471  
10,2,3401.218750  
10,2,4675.713592  
10,2,5161.782258  
10,2,5879.325980  
10,2,1797.191176  
10,2,1578.283854  
10,2,1896.280000  
10,2,3981.732558  
10,2,1996.470588  
10,2,1582.561111  
10,2,6154.803571  
10,2,2700.207500  
10,2,3142.206250  
10,2,2493.461538  
10,2,2198.702703  
10,2,1592.717949  
10,2,2545.297794  
10,2,1919.428191  
10,2,1785.244898  
10,2,2572.921569  
10,2,3777.352941  
10,2,3640.055556  
10,2,3809.097826  
10,2,3194.603723  
10,2,3647.394231  
10,2,11177.458333  
10,2,2882.859375  
10,2,2075.320513  
10,2,2472.050000  
10,2,2666.611979  
10,2,2463.510638  
10,2,2977.015625  
10,2,9868.238739  
10,2,4263.453488

10,2,2154.745192  
10,2,7437.945000  
10,2,4611.255952  
10,2,4777.440000  
10,2,6815.153846  
10,2,2166.925676  
10,2,10942.064103  
10,2,2699.156977  
10,2,1962.552083  
10,2,1609.514423  
10,2,4033.666667  
10,2,2397.328829  
10,2,4559.423077  
10,2,1592.587838  
10,2,2281.274359  
10,2,1673.174359  
10,2,10151.217593  
10,2,11699.744565  
10,2,1892.409884  
10,2,3014.769231  
10,2,2558.846154  
10,2,3749.736111  
10,2,2174.346154  
10,2,5945.770833  
10,2,1685.953947  
10,2,4429.045455  
10,2,3614.920213  
10,2,4333.798469  
10,2,10499.931818  
10,2,7130.622857  
10,2,4632.695652  
10,2,3269.303571  
10,2,4529.458333  
10,2,3242.940476  
10,2,4402.083333  
10,2,3642.164286  
10,2,5564.062500  
10,2,1577.201220  
10,2,2331.250000  
10,2,4586.117647  
10,2,2035.000000  
10,2,7352.107143  
10,2,3767.201531  
10,2,1710.567073  
10,2,1538.134868  
10,2,1978.060897  
10,2,1729.275000  
10,2,4300.625000  
10,2,1611.857843  
10,2,3214.365591  
10,2,2164.963415  
10,2,12563.912621  
10,2,2713.795918  
10,2,2969.637405  
10,2,2169.472222  
10,2,6088.011628  
10,2,2970.877660  
10,2,10340.333333  
10,2,2628.871795  
10,2,2248.802083  
10,2,4443.150000  
10,2,2729.463415  
10,2,4231.156250  
10,2,2059.428571  
10,2,2005.423077  
10,2,8831.655303

10,2,2519.921875  
10,2,1566.284884  
10,2,5200.689655  
10,2,4534.026163  
10,2,1783.755556  
10,2,1602.200000  
10,2,1719.529070  
10,2,2215.854167  
10,2,4648.307692  
10,2,8087.617021  
10,2,1721.774038  
10,2,1522.981707  
10,2,1785.646875  
10,2,4684.165625  
10,2,2295.647059  
10,2,3071.006579  
10,2,5894.572727  
10,2,2124.530612  
10,2,7522.637500  
10,2,2994.940625  
10,2,16077.407738  
10,2,2338.543750  
10,2,5615.244186  
10,2,1647.125000  
10,2,2959.000000  
10,2,1560.783333  
10,2,2620.040541  
10,2,3596.410377  
10,2,8271.996154  
10,2,3630.272727  
10,2,4172.502463  
10,2,2933.979651  
10,2,6798.375000  
10,2,1988.755814  
10,2,4432.809045  
10,2,1528.260417  
10,2,2225.776316  
10,2,13059.709459  
10,2,12610.652174  
10,2,1909.197917  
10,2,1672.636364  
10,2,1790.215116  
10,2,3529.516949  
10,2,2914.000000  
10,2,6828.222561  
10,2,2070.964286  
10,2,8098.530612  
10,2,1822.715278  
10,2,2069.537162  
10,2,2619.650000  
10,2,2280.375000  
10,2,4158.606383  
10,2,2155.000000  
10,2,4898.014706  
10,2,3071.000000  
10,2,7676.304688  
10,2,2303.908805  
10,2,4751.254902  
10,2,9998.212500  
10,2,3362.053571  
10,2,1724.232143  
10,2,1832.625000  
10,2,1984.571429  
10,2,5220.735294  
10,2,4429.091837  
10,2,5169.185185

10,2,2752.449438  
10,2,4485.782738  
10,2,3920.026596  
10,2,2039.068182  
10,2,7099.263889  
10,2,12330.914062  
10,2,1514.258721  
10,2,5730.288934  
10,2,2145.586957  
10,2,2261.806452  
10,2,2493.884831  
10,2,3023.150376  
10,2,2975.845109  
10,2,2100.683824  
10,2,2864.729167  
10,2,1871.317073  
10,2,2311.289216  
10,2,2547.738889  
10,2,7143.265306  
10,2,1566.411017  
10,2,2692.500000  
10,2,1984.820122  
10,2,2864.770833  
10,2,1965.719512  
10,2,2750.518750  
10,2,1717.600000  
10,2,4752.906863  
10,2,1750.395349  
10,2,1655.613636  
10,2,2420.777027  
10,2,4228.549180  
10,2,2849.064904  
10,2,4344.364286  
10,2,3574.275000  
10,2,3868.900000  
10,2,3447.773810  
10,2,1546.664894  
10,2,2350.686111  
10,2,8473.026442  
10,2,1527.609756  
10,2,2645.841530  
10,2,1892.200000  
10,2,2616.412234  
10,2,2061.154605  
10,2,4316.475694  
10,2,1606.358491  
10,2,1568.375000  
10,2,1611.151163  
10,2,6179.450000  
10,2,3330.346591  
10,2,2091.271739  
10,2,9027.926630  
10,2,1597.067568  
10,2,4606.090909  
10,2,2871.759615  
10,2,2944.641447  
10,2,2224.487805  
10,2,3813.803125  
10,2,3100.804348  
10,2,23346.000000  
10,2,5376.000000  
10,2,5009.788043  
10,2,8916.277778  
10,2,2796.566327  
10,2,1965.987805  
10,2,1737.909091

10,2,2436.360795  
10,2,2228.170886  
10,2,1734.930000  
10,2,2801.957547  
10,2,3220.008523  
10,2,2301.345000  
10,2,2016.806452  
10,2,3806.757282  
10,2,2107.536932  
10,2,1842.629630  
10,2,5115.656566  
10,2,1798.489583  
10,2,1741.711538  
10,2,3363.351064  
10,2,4331.309375  
10,2,5812.250000  
10,2,5827.130682  
10,2,1603.824468  
10,2,1724.415000  
10,2,1777.005682  
10,2,4762.048469  
10,2,1652.300000  
10,2,6641.163265  
10,2,3269.191489  
10,2,3442.254717  
10,2,4699.447917  
10,2,3539.115000  
10,2,3518.075472  
10,2,2368.840426  
10,2,12901.406250  
10,2,2471.730263  
10,2,2662.750000  
10,2,2988.348958  
10,2,2928.225000  
10,2,1652.490909  
10,2,4627.020270  
10,2,2179.005988  
10,2,2454.502404  
10,2,1816.875000  
10,2,1916.915094  
10,2,4445.533333  
10,2,2719.425532  
10,2,2599.393519  
10,2,1661.444853  
10,2,6392.649123  
10,2,2181.429032  
10,2,1738.519886  
10,2,6029.296512  
10,2,4272.439024  
10,2,4172.500000  
10,2,2243.643939  
10,2,2781.743421  
10,2,1516.512500  
10,2,3221.635417  
10,2,16296.097826  
10,2,9046.278409  
10,2,1990.375000  
10,2,3018.485915  
10,2,2171.090000  
10,2,13101.103774  
10,2,3987.958333  
10,2,2127.000000  
10,2,2335.050676  
10,2,4203.843023  
10,2,2314.679688  
10,2,1711.162879

10,2,2751.701754  
10,2,2322.952830  
10,2,1504.072917  
10,2,5169.482759  
10,2,9256.367188  
10,2,10123.862500  
10,2,5531.181818  
10,2,3082.150235  
10,2,7918.628205  
10,2,1644.763889  
10,2,4218.200000  
10,2,3668.285714  
10,2,2412.322034  
10,2,3053.789474  
10,2,2352.185000  
10,2,3215.622340  
10,2,2596.321429  
10,2,9601.330645  
10,2,2197.500000  
10,2,1579.364706  
10,2,5180.602941  
10,2,2437.076923  
10,2,2140.132979  
10,2,2280.035256  
10,2,13421.800000  
10,2,1508.910714  
10,2,2848.375000  
10,2,3590.635417  
10,2,22164.116071  
10,2,4183.779070  
10,2,2728.172619  
10,2,1722.000000  
10,2,2998.802326  
10,2,5164.486842  
10,2,8190.926829  
10,2,2830.667683  
10,2,8241.478261  
10,2,2244.375000  
10,2,3505.516892  
10,2,1907.071429  
10,2,2404.722222  
10,2,3008.435000  
10,2,10035.900641  
10,2,4353.705882  
10,2,8034.565476  
10,2,2209.545213  
10,2,3477.017361  
10,2,2641.718750  
10,2,5243.965909  
10,2,6492.468750  
10,2,3461.515625  
10,2,10838.580838  
10,2,2292.396277  
10,2,2980.872449  
10,2,1948.391892  
10,2,4146.750000  
10,2,2728.540865  
10,2,2815.742857  
10,2,1935.458333  
10,2,4061.172222  
10,2,1970.045455  
10,2,2210.835227  
10,2,2852.441327  
10,2,3757.656250  
10,2,7017.411765  
10,2,2274.458333

10,2,1737.485294  
10,2,1733.494318  
10,2,2086.000000  
10,2,3189.083333  
10,2,2659.621212  
10,2,1624.861111  
10,2,2164.739583  
10,2,2004.292763  
10,2,3194.066860  
10,2,1616.387755  
10,2,3898.073171  
10,2,8887.210526  
10,2,1924.632353  
10,2,2061.559211  
10,2,8108.004717  
10,2,2743.213415  
10,2,2325.884615  
10,2,5861.159574  
10,2,2084.437500  
10,2,2270.323529  
10,2,1869.497093  
10,2,1880.700000  
10,2,10682.114362  
10,2,2739.900000  
10,2,2820.500000  
10,2,2711.466960  
10,2,2100.660000  
10,2,3138.510870  
10,2,6638.398773  
10,2,2103.993590  
10,2,3499.867647  
10,2,6036.041667  
10,2,2192.640000  
10,2,7758.432432  
10,2,19659.016026  
10,2,2780.553571  
10,2,3504.745455  
10,2,4768.128571  
10,2,8312.290816  
10,2,3625.585938  
10,2,2683.862745  
10,2,18490.326923  
10,2,4928.147783  
10,2,3461.110294  
10,2,8101.867647  
10,2,2337.034884  
10,2,8310.179348  
10,2,2441.587500  
10,2,2287.135638  
10,2,10278.827128  
10,2,5019.324324  
10,2,2820.021341  
10,2,19335.437500  
10,2,3747.854167  
10,2,3119.137019  
10,2,8814.666667  
10,2,2635.125000  
10,2,5291.931818  
10,2,1567.217949  
10,2,2409.923295  
10,2,1631.883152  
10,2,3814.325000  
10,2,1862.355263  
10,2,2638.537736  
10,2,1732.955556  
10,2,3994.479651

10,2,2626.382979  
10,2,2567.291667  
10,2,1939.250000  
10,2,6534.744318  
10,2,2806.035326  
10,2,1830.250000  
10,2,9568.281250  
10,2,2671.666667  
10,2,2563.478261  
10,2,2083.596154  
10,2,1811.300000  
10,2,1852.028125  
10,2,3655.750000  
10,2,1820.892045  
10,2,2806.959302  
10,2,2907.481707  
10,2,1918.941176  
10,2,2221.866071  
10,2,2753.552083  
10,2,1871.421875  
10,2,1753.805556  
10,2,2143.440476  
10,2,3339.854167  
10,2,9436.187500  
10,2,5129.720930  
10,2,5564.440000  
10,2,13733.208333  
10,2,4244.567073  
10,2,1587.306548  
10,2,2821.118056  
10,2,2070.580645  
10,2,3379.873239  
10,2,4135.863208  
10,2,3292.639535  
10,2,2878.553571  
10,2,1981.385000  
10,2,5279.936321  
10,2,1904.012195  
10,2,2177.100000  
10,2,2314.056818  
10,2,3753.539855  
10,2,2152.003049  
10,2,1592.371711  
10,2,4359.790576  
10,2,1600.308824  
10,2,2293.320755  
10,2,2429.812500  
10,2,2918.279070  
10,2,2870.531915  
10,2,4903.592262  
10,2,3877.432692  
10,2,12065.583333  
10,2,2392.108108  
10,2,6093.570513  
10,2,14500.579268  
10,2,4208.842105  
10,2,2557.591837  
10,2,3459.578378  
10,2,2180.250000  
10,2,1625.085366  
10,2,2036.755102  
10,2,2548.575000  
10,2,2750.826087  
10,2,4761.989130  
10,2,8018.355978  
10,2,4778.997500

10,2,42143.428571  
10,2,4509.015957  
10,2,8192.785326  
10,2,1880.411111  
10,2,1671.518519  
10,2,16205.346429  
10,2,7491.425595  
10,2,2631.842391  
10,2,4570.461538  
10,2,3945.238636  
10,2,8845.765625  
10,2,10132.259615  
10,2,4983.932432  
10,2,4511.642045  
10,2,1800.073171  
10,2,5480.785714  
10,2,1792.562500  
10,2,6069.344444  
10,2,2459.587500  
10,2,1803.215426  
10,2,3715.578125  
10,2,1791.423841  
10,2,2257.010204  
10,2,6138.382500  
10,2,2593.459239  
10,2,1562.259777  
10,2,3711.023438  
10,2,3900.302326  
10,2,2045.252551  
10,2,2099.549342  
10,2,6174.629630  
10,2,4635.971698  
10,2,6379.011905  
10,2,4985.346591  
10,2,3849.717949  
10,2,2179.557292  
10,2,4447.128205  
10,2,2536.000000  
10,2,5636.509434  
10,2,2462.418478  
10,2,2218.289216  
10,2,2805.062500  
10,2,2343.276074  
10,2,19504.000000  
10,2,2986.341146  
10,2,7544.216667  
10,2,3207.183333  
10,2,2416.010204  
10,2,1745.423913  
10,2,4511.839286  
10,2,2722.158784  
10,2,4752.971698  
10,2,2557.102273  
10,2,2450.453431  
10,2,6525.250000  
10,2,2008.704082  
10,2,10261.873016  
10,2,2583.921875  
10,2,6728.016447  
10,2,3244.563889  
10,2,6189.400735  
10,2,4647.229167  
10,2,2062.469512  
10,2,6308.473958  
10,2,2099.300000  
10,2,1841.985119

10,2,3388.267045  
10,2,4016.770270  
10,2,5291.532895  
10,2,3269.026316  
10,2,4471.375000  
10,2,2051.594595  
10,2,2985.185897  
10,2,4259.133333  
10,2,3931.454545  
10,2,14374.550000  
10,2,3315.440789  
10,2,2936.912037  
10,2,7807.644737  
10,2,1783.960366  
10,2,2996.432515  
10,2,3230.168919  
10,2,4788.095000  
10,2,2417.823529  
10,2,25004.125000  
10,2,1709.276596  
10,2,4290.654891  
10,2,3020.627778  
10,2,4339.907051  
10,2,2278.415625  
10,2,2763.836735  
10,2,2641.217391  
10,2,1969.847826  
10,2,2710.500000  
10,2,3041.727273  
10,2,9050.347222  
10,2,2232.031915  
10,2,3045.187500  
10,2,3385.797170  
10,2,2279.039062  
10,2,7505.076923  
10,2,3011.932065  
10,2,13976.633621  
10,2,4413.358333  
10,2,3161.904762  
10,2,3600.131944  
10,2,5926.856250  
10,2,2806.487685  
10,2,7136.323529  
10,2,1915.113636  
10,2,2738.171875  
10,2,2304.153846  
10,2,6091.688776  
10,2,2044.058511  
10,2,10658.171371  
10,2,2817.833333  
10,2,4744.981707  
10,2,3819.987179  
10,2,1859.570946  
10,2,2773.653061  
10,2,3256.907143  
10,2,6986.558140  
10,2,2990.182927  
10,2,3295.050000  
10,2,18869.633621  
10,2,5767.068396  
10,2,7064.437500  
10,2,7803.384615  
10,2,1738.343750  
10,2,2761.000000  
10,2,2650.071875  
10,2,2371.481818

10,2,3127.987805  
10,2,4037.428571  
10,2,4336.562500  
10,2,2552.816667  
10,2,10654.860000  
10,2,1580.294118  
10,2,2369.406250  
10,2,1660.625000  
10,2,1809.425532  
10,2,2384.363636  
10,2,3433.725000  
10,2,1579.198718  
10,2,13471.500000  
10,2,2386.372340  
10,2,11834.400735  
10,2,1819.545455  
10,2,2105.528846  
10,2,1899.572500  
10,2,2691.603261  
10,2,7670.063830  
10,2,5864.750000  
10,2,2724.978659  
10,2,7040.458333  
10,2,29925.645833  
10,2,2049.602564  
10,2,2799.589674  
10,2,4035.695652  
10,2,1714.300000  
10,2,2268.142157  
10,2,2047.236111  
10,2,4689.292683  
10,2,3662.308511  
10,2,1812.332386  
10,2,4335.522059  
10,2,3130.971698  
10,2,1528.005814  
10,2,5334.346154  
10,2,1644.454545  
10,2,1717.032258  
10,2,1801.024194  
10,2,5717.445652  
10,2,2939.361111  
10,2,3362.846154  
10,2,1930.878049  
10,2,1525.263889  
10,2,2105.929907  
10,2,2909.866279  
10,2,2869.510870  
10,2,1733.459459  
10,2,3022.981595  
10,2,2323.502857  
10,2,2884.050000  
10,2,4668.400000  
10,2,7491.385321  
10,2,2107.250000  
10,2,1795.036932  
10,2,3815.245000  
10,2,1689.354167  
10,2,1612.750000  
10,2,1695.889205  
10,2,1589.595238  
10,2,4817.429487  
10,2,8777.802083  
10,2,10855.948113  
10,2,3747.887500  
10,2,2140.545455

10,2,7504.000000  
10,2,11146.586538  
10,2,4981.267442  
10,2,5043.125000  
10,2,4560.402174  
10,2,2038.117021  
10,2,8686.158784  
10,2,2108.343750  
10,2,3405.673797  
10,2,4812.452703  
10,2,3760.005435  
10,2,1734.420765  
10,2,7446.752717  
10,2,3626.773585  
10,2,3494.826220  
10,2,6194.851064  
10,2,1731.390244  
10,2,6125.565789  
10,2,2061.040625  
10,2,1846.138158  
10,2,2164.200000  
10,2,3822.083333  
10,2,10225.875000  
10,2,4991.411058  
10,2,2159.006098  
10,2,4769.080000  
10,2,8810.206731  
10,2,3689.777778  
10,2,5010.878049  
10,2,4759.021739  
10,2,3995.057143  
10,2,2501.906250  
10,2,4375.767442  
10,2,1562.604651  
10,2,1596.702128  
10,2,5908.781250  
10,2,1545.011236  
10,2,1512.725000  
10,2,1650.755682  
10,2,8732.927885  
10,2,6327.621212  
10,2,5049.383929  
10,2,1927.867347  
10,2,2865.476974  
10,2,3635.537037  
10,2,8791.482500  
10,2,1989.312500  
10,2,3682.052632  
10,2,1523.383523  
10,2,3331.812500  
10,2,4363.957317  
10,2,12825.741935  
10,2,4430.607143  
10,2,2874.942708  
10,2,2439.297872  
10,2,5452.360887  
10,2,5193.227273  
10,2,2063.044586  
10,2,2953.439024  
10,2,3324.905325  
10,2,1736.831081  
10,2,2782.447674  
10,2,3953.857143  
10,2,3066.857143  
10,2,17700.622596  
10,2,2924.321429

10,2,3119.071429  
10,2,8512.932692  
10,2,3883.142857  
10,2,7105.315789  
10,2,2864.051163  
10,2,6156.188889  
10,2,2208.714286  
10,2,1644.362069  
10,2,5353.338415  
10,2,1841.000000  
10,2,2321.593750  
10,2,2201.440000  
10,2,3140.971429  
10,2,6499.604651  
10,2,1814.255319  
10,2,1717.533654  
10,2,1871.230769  
10,2,4395.978947  
10,2,4577.534653  
10,2,6336.179688  
10,2,1584.090278  
10,2,6903.480978  
10,2,1624.188679  
10,2,3154.976351  
10,2,4445.452128  
10,2,1812.242424  
10,2,6581.715426  
10,2,1982.672872  
10,2,4153.621795  
10,2,3415.664804  
10,2,2044.977528  
10,2,62352.287037  
10,2,2368.380952  
10,2,4551.133721  
10,2,8676.918750  
10,2,2059.869565  
10,2,3296.372340  
10,2,4026.945652  
10,2,1641.436170  
10,2,3599.031250  
10,2,1636.366477  
10,2,1528.093220  
10,2,3440.995763  
10,2,1737.187500  
10,2,14500.085106  
10,2,1794.043750  
10,2,1865.470588  
10,2,3541.715909  
10,2,6300.346939  
10,2,2542.656250  
10,2,1533.625000  
10,2,2278.569079  
10,2,2752.728125  
10,2,3614.204678  
10,2,3975.250000  
10,2,11025.335366  
10,2,2195.910000  
10,2,6926.109290  
10,2,2081.951872  
10,2,2391.591837  
10,2,1807.578125  
10,2,4381.244048  
10,2,2885.710938  
10,2,3315.382979  
10,2,7282.601744  
10,2,4285.277778

10,2,5084.870536  
10,2,3143.688571  
10,2,5836.240909  
10,2,1832.000000  
10,2,1900.916667  
10,2,3524.571809  
10,2,35995.406250  
10,2,1708.575758  
10,2,8472.895833  
10,2,1607.250000  
10,2,2350.078125  
10,2,7613.791667  
10,2,1608.915584  
10,2,4827.592593  
10,2,7982.120690  
10,2,6831.269461  
10,2,2005.718085  
10,2,1891.305556  
10,2,2601.790698  
10,2,3476.904891  
10,2,28805.555921  
10,2,10370.033784  
10,2,4442.676471  
10,2,1752.718085  
10,2,3395.907407  
10,2,1892.933333  
10,2,6270.167614  
10,2,4405.358491  
10,2,2514.184659  
10,2,1941.991477  
10,2,2897.795455  
10,2,6249.711538  
10,2,2433.193548  
10,2,6679.566176  
10,2,4631.605263  
10,2,7962.857143  
10,2,2585.000000  
10,2,1619.400000  
10,2,7916.670732  
10,2,2984.970455  
10,2,2148.425595  
10,2,4188.583333  
10,2,7691.000000  
10,2,4189.088889  
10,2,5414.948113  
10,2,2570.214552  
10,2,8415.974265  
10,2,2928.860849  
10,2,12949.839286  
10,2,2227.553571  
10,2,1954.437500  
10,2,2949.556818  
10,2,1967.700000  
10,2,2439.804054  
10,2,4964.170455  
10,2,1996.664474  
10,2,3947.968750  
10,2,1828.208333  
10,2,6325.100000  
10,2,5281.402778  
10,2,3805.174020  
10,2,7250.645833  
10,2,3945.261628  
10,2,5981.227477  
10,2,4706.136364  
10,2,2002.990909

10,2,7078.110256  
10,2,1610.834532  
10,2,2570.545226  
10,2,2619.942029  
10,2,2447.887195  
10,2,6752.457447  
10,2,1748.150000  
10,2,6681.038889  
10,2,2693.215909  
10,2,2057.643229  
10,2,1917.067568  
10,2,9434.083333  
10,2,4766.663636  
10,2,4063.006098  
10,2,2503.401042  
10,2,1800.592949  
10,2,2488.880829  
10,2,3688.470779  
10,2,2256.775641  
10,2,10785.369792  
10,2,1990.562500  
10,2,7350.850877  
10,2,2063.517045  
10,2,2086.840000  
10,2,28502.435714  
10,2,1718.875000  
10,2,5555.000000  
10,2,1595.095238  
10,2,5289.727273  
10,2,2135.148649  
10,2,3621.700000  
10,2,2244.480263  
10,2,4478.203125  
10,2,3600.210938  
10,2,3446.094595  
10,2,6584.672500  
10,2,2952.233333  
10,2,2158.673295  
10,2,18568.000000  
10,2,5283.467391  
10,2,3076.671429  
10,2,3189.861111  
10,2,1650.994186  
10,2,4521.070175  
10,2,2283.500000  
10,2,5022.729167  
10,2,3303.568182  
10,2,2497.614362  
10,2,3053.157895  
10,2,1868.033784  
10,2,2523.029070  
10,2,2584.965278  
10,2,5857.827660  
10,2,5120.954106  
10,2,3304.110256  
10,2,2881.115385  
10,2,1608.000000  
10,2,3208.845588  
10,2,1591.031250  
10,2,2396.270270  
10,2,2149.050000  
10,2,3869.480769  
10,2,8165.375000  
10,2,10735.262755  
10,2,2496.146341  
10,2,5062.171875

10,2,1576.156863  
10,2,6735.223684  
10,2,3345.549020  
10,2,4334.637755  
10,2,2305.823171  
10,2,7723.328704  
10,2,10329.938547  
10,2,2703.902778  
10,2,2317.469697  
10,2,9572.039683  
10,2,1532.326705  
10,2,17902.500000  
10,2,6482.738636  
10,2,2521.034483  
10,2,2815.756250  
10,2,1976.364583  
10,2,1548.492857  
10,2,6326.871795  
10,2,4905.696429  
10,2,4606.619681  
10,2,3120.891304  
10,2,1520.031250  
10,2,8623.970109  
10,2,2210.676829  
10,2,2885.250000  
10,2,1951.715000  
10,2,5670.268382  
10,2,12912.000000  
10,2,11549.905738  
10,2,3011.000000  
10,2,4407.524390  
10,2,1505.423913  
10,2,2458.335227  
10,2,17525.170213  
10,2,3382.781250  
10,2,2399.316176  
10,2,1532.114583  
10,2,1677.465000  
10,2,2143.838235  
10,2,1966.836735  
10,2,4773.828125  
10,2,2146.980198  
10,2,4156.206161  
10,2,4884.214286  
10,2,1934.648810  
10,2,5221.110000  
10,2,7980.627049  
10,2,4106.967500  
10,2,4642.948864  
10,2,3788.510638  
10,2,4673.752809  
10,2,2250.968023  
10,2,2792.628049  
10,2,9416.593085  
10,2,4388.000000  
10,2,4487.302632  
10,2,1939.100000  
10,2,6170.211921  
10,2,8036.658654  
10,2,3601.702381  
10,2,1986.819079  
10,2,2140.176282  
10,2,2083.432432  
10,2,4750.867021  
10,2,3126.855263  
10,2,1633.743750

10,2,9891.932292  
10,2,13603.819853  
10,2,12936.490566  
10,2,5748.162234  
10,2,2111.257576  
10,2,2502.000000  
10,2,2876.462766  
10,2,2566.790816  
10,2,7848.100000  
10,2,1728.404412  
10,2,3555.500000  
10,2,2808.883978  
10,2,7459.339286  
10,2,2334.783333  
10,2,5157.880952  
10,2,1987.467949  
10,2,2345.279255  
10,2,4067.725962  
10,2,2256.062500  
10,2,2341.684211  
10,2,1864.967391  
10,2,1774.142857  
10,2,3969.037500  
10,2,6511.632653  
10,2,1683.090278  
10,2,3191.717391  
10,2,2111.098837  
10,2,1814.068063  
10,2,3802.840426  
10,2,3539.128378  
10,2,5966.417500  
10,2,1885.045455  
10,2,2047.921053  
10,2,2043.000000  
10,2,1879.562500  
10,2,2568.832143  
10,2,3744.622222  
10,2,4070.136792  
10,2,3134.926471  
10,2,2120.789474  
10,2,3583.028736  
10,2,1771.328571  
10,2,1742.155405  
10,2,1676.500000  
10,2,4839.494318  
10,2,4290.350000  
10,2,3704.236111  
10,2,3400.102679  
10,2,3460.375000  
10,2,3980.513514  
10,2,3256.500000  
10,2,1802.046875  
10,2,4315.410714  
10,2,7490.325581  
10,2,2297.635638  
10,2,1803.384615  
10,2,2757.421875  
10,2,32059.629310  
10,2,1792.684659  
10,2,6651.258333  
10,2,1961.806122  
10,2,4845.273438  
10,2,4361.163043  
10,2,2006.348404  
10,2,21737.052632  
10,2,3622.219512

10,2,6578.850000  
10,2,4513.574324  
10,2,2494.304054  
10,2,1499.437173  
10,2,1680.019126  
10,2,3796.091346  
10,2,5064.290625  
10,2,5200.300000  
10,2,5030.829787  
10,2,2107.380952  
10,2,1530.173077  
10,2,1874.687500  
10,2,14229.855769  
10,2,12364.422872  
10,2,1598.315625  
10,2,6399.477273  
10,2,11315.049107  
10,2,2764.195652  
10,2,1573.000000  
10,2,1710.845745  
10,2,2164.803571  
10,2,2114.080000  
10,2,1769.386029  
10,2,3041.071429  
10,2,2093.022727  
10,2,5208.044492  
10,2,3349.738095  
10,2,3708.141509  
10,2,4673.750000  
10,2,2083.464286  
10,2,2439.500000  
10,2,8493.323171  
10,2,3133.753676  
10,2,4254.312500  
10,2,2314.486842  
10,2,1684.606383  
10,2,3411.381579  
10,2,1641.852941  
10,2,2280.227273  
10,2,2471.600000  
10,2,3464.906977  
10,2,2551.163462  
10,2,2236.250000  
10,2,1878.133333  
10,2,4882.269608  
10,2,7040.392857  
10,2,1738.414894  
10,2,2596.776786  
10,2,5717.250000  
10,2,3143.375000  
10,2,2918.735577  
10,2,2296.956522  
10,2,4054.470588  
10,2,5350.000000  
10,2,4034.295732  
10,2,2899.407407  
10,2,5817.535714  
10,2,1815.041667  
10,2,3631.808824  
10,2,3013.032258  
10,2,2547.672414  
10,2,1939.770833  
10,2,2209.148438  
10,2,6349.605469  
10,2,6197.000000  
10,2,1500.205128

10,2,2360.697674  
10,2,2426.236842  
10,2,2285.523810  
10,2,10709.367647  
10,2,1830.951220  
10,2,3161.243590  
10,2,2475.754808  
10,2,14601.140625  
10,2,3014.841146  
10,2,2463.921875  
10,2,2354.577703  
10,2,1734.863636  
10,2,2612.271429  
10,2,3495.669355  
10,2,6180.000000  
10,2,8812.605978  
10,2,1616.285714  
10,2,3454.074468  
10,2,5226.366848  
10,2,4829.762500  
10,2,1549.828125  
10,2,2436.475962  
10,2,3014.240132  
10,2,2487.897436  
10,2,2065.816667  
10,2,1745.666667  
10,2,2780.608696  
10,2,1669.325581  
10,2,4567.464286  
10,2,6364.187500  
10,2,4084.089286  
10,2,6288.666667  
10,2,1534.431818  
10,2,5815.590909  
10,2,2976.250000  
10,2,2360.977273  
10,2,2114.764151  
10,2,4747.515000  
10,2,1583.827778  
10,2,8993.233696  
10,2,3176.416667  
10,2,2636.229730  
10,2,2317.722222  
10,2,2230.959184  
10,2,1867.040000  
10,2,3164.971875  
10,2,1955.796407  
10,2,2214.105263  
10,2,2360.299479  
10,2,3076.052356  
10,2,1675.464286  
10,2,4094.806122  
10,2,2718.885204  
10,2,3056.718750  
10,2,6508.074468  
10,2,3275.547170  
10,2,11575.614407  
10,2,1901.200000  
10,2,3177.985795  
10,2,2657.402439  
10,2,2420.571429  
10,2,1565.568807  
10,2,2696.469072  
10,2,1983.750000  
10,2,4150.631250  
10,2,20760.979167

10,2,1804.534091  
10,2,14225.744898  
10,2,3386.900000  
10,2,1625.500000  
10,2,2668.117021  
10,2,4449.325581  
10,2,3132.743243  
10,2,5940.056818  
10,2,3667.644737  
10,2,2520.178571  
10,2,2231.262295  
10,2,5900.277439  
10,2,3732.881944  
10,2,1974.566327  
10,2,6382.440000  
10,2,3310.335196  
10,2,9893.036313  
10,2,2507.731818  
10,2,22682.659314  
10,2,1559.700000  
10,2,4525.266667  
10,2,2757.880000  
10,2,3688.618590  
10,2,2661.593750  
10,2,4547.182692  
10,2,1881.606771  
10,2,4359.536765  
10,2,5967.500000  
10,2,1606.571429  
10,2,3890.130435  
10,2,2467.472222  
10,2,2883.187500  
10,2,1972.807870  
10,2,1588.559524  
10,2,2535.750000  
10,2,2577.218750  
10,2,5695.030000  
10,2,1653.708333  
10,2,5252.064815  
10,2,2883.193182  
10,2,2638.125000  
10,2,5986.825980  
10,2,1516.836957  
10,2,6605.238095  
10,2,1627.614865  
10,2,5742.950581  
10,2,6045.281250  
10,2,3104.662500  
10,2,9248.767442  
10,2,6159.000000  
10,2,1921.666667  
10,2,6391.608108  
10,2,7058.187500  
10,2,4590.142857  
10,2,1774.192500  
10,2,4345.169811  
10,2,3398.631579  
10,2,2664.321429  
10,2,2694.988372  
10,2,9202.750000  
10,2,3299.198529  
10,2,2063.717391  
10,2,3573.300000  
10,2,6730.849057  
10,2,4600.044444  
10,2,1641.326705

10,2,1820.252976  
10,2,1549.926829  
10,2,5215.480392  
10,2,3730.612069  
10,2,4078.184211  
10,2,3808.019608  
10,2,3436.432927  
10,2,6298.475000  
10,2,4104.379310  
10,2,4195.635417  
10,2,3172.213542  
10,2,4801.441860  
10,2,3740.190341  
10,2,15061.614583  
10,2,2443.243243  
10,2,4428.365741  
10,2,3459.296875  
10,2,6610.392857  
10,2,2461.862500  
10,2,3232.360465  
10,2,1770.843023  
10,2,2282.489362  
10,2,3889.977778  
10,2,1806.311224  
10,2,2111.648936  
10,2,4872.871795  
10,2,5207.756944  
10,2,1629.144578  
10,2,1558.622340  
10,2,2461.634146  
10,2,1880.153226  
10,2,3158.809524  
10,2,2723.947115  
10,2,25808.050000  
10,2,1929.931818  
10,2,3508.652632  
10,2,11526.801887  
10,2,5614.394737  
10,2,2433.277778  
10,2,4305.982143  
10,2,3656.311170  
10,2,1851.467949  
10,2,2407.552083  
10,2,1669.875000  
10,2,2876.950000  
10,2,1815.500000  
10,2,1985.576923  
10,2,3658.094340  
10,2,2167.650568  
10,2,7529.701422  
10,2,4398.260417  
10,2,2575.383721  
10,2,2125.791667  
10,2,2050.039773  
10,2,1694.825581  
10,2,3266.627451  
10,2,1956.141304  
10,2,3239.437500  
10,2,3679.671053  
10,2,3482.651786  
10,2,2871.119565  
10,2,4869.648810  
10,2,1976.930380  
10,2,12381.916667  
10,2,1947.191176  
10,2,2547.862500

10,2,6169.277778  
10,2,1810.759868  
10,2,1521.027344  
10,2,4759.731250  
10,2,1779.090909  
10,2,2254.034483  
10,2,2725.158537  
10,2,2054.591146  
10,2,4393.611979  
10,2,3324.111111  
10,2,7225.736842  
10,2,14313.669118  
10,2,2953.331731  
10,2,4248.678571  
10,2,2954.202614  
10,2,3470.294643  
10,2,1866.400000  
10,2,1939.043478  
10,2,2692.146429  
10,2,4842.613636  
10,2,1965.323529  
10,2,13350.308057  
10,2,4323.216080  
10,2,3225.681373  
10,2,2814.200000  
10,2,1707.592105  
10,2,1661.125000  
10,2,5078.710526  
10,2,1632.041667  
10,2,3140.593750  
10,2,5543.154545  
10,2,5625.945122  
10,2,2441.906863  
10,2,2488.045455  
10,2,1744.780488  
10,2,2310.822500  
10,2,2316.321875  
10,2,7916.875000  
10,2,4241.635135  
10,2,5770.701220  
10,2,1537.675595  
10,2,2111.460227  
10,2,3938.875000  
10,2,3077.434783  
10,2,1673.552632  
10,2,1642.866667  
10,2,23416.187500  
10,2,3184.636364  
10,2,1810.301887  
10,2,1522.469697  
10,2,5171.715426  
10,2,2313.238636  
10,2,2278.519886  
10,2,3497.633929  
10,2,3474.787736  
10,2,7272.908537  
10,2,4452.450000  
10,2,5799.979651  
10,2,2067.471591  
10,2,2534.695652  
10,2,5840.682927  
10,2,4399.000000  
10,2,4569.987805  
10,2,1589.600000  
10,2,7075.240000  
10,2,2998.237013

10,2,6663.488095  
10,2,1986.775510  
10,2,3126.684783  
10,2,1758.298077  
10,2,4587.406250  
10,2,3721.761905  
10,2,21766.522059  
10,2,7655.609649  
10,2,2433.321429  
10,2,37136.486111  
10,2,4488.943966  
10,2,4498.797727  
10,2,1724.704268  
10,2,1822.707317  
10,2,12661.739796  
10,2,3515.111702  
10,2,4423.518293  
10,2,1592.547297  
10,2,3505.061224  
10,2,2800.200000  
10,2,1507.709239  
10,2,1955.547222  
10,2,3969.263298  
10,2,2851.730263  
10,2,4116.702128  
10,2,2898.305851  
10,2,3000.005435  
10,2,1742.628205  
10,2,2735.000000  
10,2,1520.604651  
10,2,4942.136364  
10,2,1592.939103  
10,2,3584.212500  
10,2,2245.781250  
10,2,3733.134146  
10,2,1916.285714  
10,2,5937.086735  
10,2,1523.533537  
10,2,8123.956522  
10,2,3670.053191  
10,2,2708.597826  
10,2,3192.255556  
10,2,2838.434783  
10,2,1750.072368  
10,2,7421.073661  
10,2,3534.284091  
10,2,5918.321429  
10,2,5041.138298  
10,2,13594.428571  
10,2,4134.581395  
10,2,3014.861413  
10,2,5273.854167  
10,2,6552.239583  
10,2,3049.906250  
10,2,7028.185000  
10,2,15616.076531  
10,2,5270.658163  
10,2,3281.000000  
10,2,7622.255869  
10,2,1549.071429  
10,2,2519.826087  
10,2,2264.446429  
10,2,3159.493056  
10,2,2199.467262  
10,2,1702.277027  
10,2,6845.869198

10,2,2501.928571  
10,2,3492.539474  
10,2,2974.658537  
10,2,11488.437500  
10,2,2141.263514  
10,2,5714.225000  
10,2,2831.619681  
10,2,2228.038462  
10,2,2022.267361  
10,2,4492.068452  
10,2,2740.601190  
10,2,4728.230392  
10,2,6205.098039  
10,2,2740.293478  
10,2,2738.781977  
10,2,13512.533482  
10,2,5156.829268  
10,2,3744.906250  
10,2,1702.600000  
10,2,2154.185096  
10,2,19866.539216  
10,2,5521.173913  
10,2,3333.422170  
10,2,6449.444444  
10,2,2494.881579  
10,2,2585.913636  
10,2,2130.757212  
10,2,3157.328704  
10,2,1655.096154  
10,2,8839.520000  
10,2,9343.071023  
10,2,2274.208092  
10,2,3944.406915  
10,2,2165.144737  
10,2,1535.616071  
10,2,1791.621875  
10,2,2260.679487  
10,2,1757.324324  
10,2,1707.000000  
10,2,2670.326531  
10,2,7391.891892  
10,2,4265.938272  
10,2,1576.014286  
10,2,2681.719101  
10,2,3762.680000  
10,2,4095.600000  
10,2,3348.366071  
10,2,1836.833333  
10,2,4642.671875  
10,2,1884.162234  
10,2,1551.519608  
10,2,2455.393617  
10,2,2790.444444  
10,2,3217.574468  
10,2,28056.705729  
10,2,6791.053571  
10,2,2114.957447  
10,2,3938.056180  
10,2,1940.022727  
10,2,3670.918605  
10,2,3472.924419  
10,2,4784.638889  
10,2,5661.695000  
10,2,1963.153846  
10,2,1500.135870  
10,2,2812.450000

10,2,5972.914634  
10,2,4408.346875  
10,2,1616.156250  
10,2,2615.914773  
10,2,2318.664474  
10,2,1516.104651  
10,2,2793.428571  
10,2,10352.801471  
10,2,1531.969388  
10,2,3831.008721  
10,2,2157.079787  
10,2,2498.733333  
10,2,2055.642857  
10,2,2059.656250  
10,2,11236.576087  
10,2,2197.360759  
10,2,3562.800000  
10,2,1560.215686  
10,2,2438.199074  
10,2,1877.255319  
10,2,4921.111364  
10,2,3977.890625  
10,2,3556.695000  
10,2,1555.212500  
10,2,4762.796196  
10,2,5576.298165  
10,2,3635.283019  
10,2,3202.500000  
10,2,2252.847826  
10,2,1877.706081  
10,2,4358.390625  
10,2,3907.604167  
10,2,3730.211538  
10,2,3353.053571  
10,2,2569.552326  
10,2,1544.107500  
10,2,1905.528302  
10,2,3875.296875  
10,2,6498.800532  
10,2,8359.010638  
10,2,1773.402500  
10,2,3895.833333  
10,2,1805.508065  
10,2,1738.979911  
10,2,4478.785714  
10,2,4256.668478  
10,2,2143.584375  
10,2,7485.641026  
10,2,3437.962766  
10,2,2909.791667  
10,2,9158.830882  
10,2,2215.023256  
10,2,3042.157895  
10,2,2704.622995  
10,2,4591.481283  
10,2,8452.705357  
10,2,2283.666667  
10,2,6183.500000  
10,2,4257.843023  
10,2,3287.980263  
10,2,1519.437500  
10,2,2039.265625  
10,2,1762.002778  
10,2,1761.370000  
10,2,3066.375000  
10,2,4298.548611

10,2,2045.934211  
10,2,1502.400000  
10,2,28359.399441  
10,2,3600.678191  
10,2,1940.521552  
10,2,2822.271186  
10,2,4298.474432  
10,2,3649.125000  
10,2,2463.625000  
10,2,4833.391304  
10,2,4239.977564  
10,2,3313.773585  
10,2,3591.175000  
10,2,2780.823864  
10,2,1798.352941  
10,2,2328.655556  
10,2,2692.917683  
10,2,3246.509615  
10,2,1987.562500  
10,2,5048.847826  
10,2,2843.556604  
10,2,18318.781250  
10,2,2081.533537  
10,2,4247.750000  
10,2,1548.628205  
10,2,4056.250000  
10,2,1692.647541  
10,2,2491.457031  
10,2,34854.109375  
10,2,2002.060976  
10,2,32354.928571  
10,2,5439.191489  
10,2,14590.395349  
10,2,2267.451220  
10,2,1523.056452  
10,2,1666.450521  
10,2,1799.521277  
10,2,2392.085000  
10,2,3218.045455  
10,2,7999.832447  
10,2,1587.276163  
10,2,4235.138158  
10,2,2282.073171  
10,2,3860.391304  
10,2,5061.333333  
10,2,3199.625000  
10,2,6633.520408  
10,2,1956.900510  
10,2,2864.017442  
10,2,10908.932927  
10,2,2319.164062  
10,2,1922.375000  
10,2,6402.046053  
10,2,78824.250000  
10,2,5165.976744  
10,2,2925.411458  
10,2,12491.417219  
10,2,2075.208333  
10,2,4482.201531  
10,2,1956.500000  
10,2,2412.201923  
10,2,2825.762195  
10,2,2078.609467  
10,2,1870.450980  
10,2,6687.912500  
10,2,1567.679688

10,2,4912.921053  
10,2,1799.194444  
10,2,2539.500000  
10,2,2288.155556  
10,2,6292.090909  
10,2,4708.318182  
10,2,3671.015625  
10,2,2034.006757  
10,2,4730.351293  
10,2,9707.525862  
10,2,3325.427184  
10,2,2585.625000  
10,2,3868.750000  
10,2,1953.605263  
10,2,3005.261628  
10,2,2082.317308  
10,2,1733.823529  
10,2,6841.568421  
10,2,2317.923077  
11,1,1795.785714  
11,1,58275.798013  
11,1,1902.272727  
11,1,1719.205882  
11,1,41169.500000  
11,1,1995.009615  
11,1,32262.875000  
11,1,20031.021277  
11,1,1613.365385  
11,1,3629.063953  
11,1,44690.604167  
11,1,4134.180851  
11,1,9027.378676  
11,1,1507.062500  
11,1,2201.085938  
11,1,1645.714286  
11,1,32369.143617  
11,1,3530.195122  
11,1,75969.894737  
11,1,53764.942308  
11,1,1852.583333  
11,1,16721.347222  
11,1,6652.702128  
11,1,7814.770349  
11,1,1870.346591  
11,1,42082.270833  
11,1,1732.094595  
11,1,29091.300781  
11,1,4015.520833  
11,1,1838.477941  
11,1,23023.307692  
11,1,5837.276786  
11,1,1820.172414  
11,1,60138.067308  
11,1,155011.700000  
11,1,3725.679348  
11,1,19711.917614  
11,1,7724.267442  
11,1,17137.535714  
11,1,2104.544643  
11,1,84226.125000  
11,1,3489.735294  
11,1,2710.031250  
11,1,1844.279070  
11,1,1570.756098  
11,1,87312.000000  
11,1,64123.638158

11,1,2046.627778  
11,1,1601.271739  
11,1,19046.750000  
11,1,9878.846154  
11,1,4149.459302  
11,1,3369.695652  
11,1,11658.151786  
11,1,2843.210000  
11,1,103766.116071  
11,1,1569.000000  
11,1,3975.904762  
11,1,17683.316667  
11,1,4057.891026  
11,1,2654.447368  
11,1,1963.697368  
11,1,16727.132143  
11,1,3167.175000  
11,1,30142.565789  
11,1,1594.096774  
11,1,1943.377778  
11,1,3158.036184  
11,1,21848.500000  
11,1,86292.000000  
11,1,2591.402174  
11,1,4692.951705  
11,1,98884.300000  
11,1,2207.843750  
11,1,90991.635135  
11,1,21658.157143  
11,1,1938.287500  
11,1,2160.614286  
11,1,10346.391447  
11,1,2746.044643  
11,1,120071.600000  
11,1,3206.646875  
11,1,1702.278061  
11,1,2577.604651  
11,1,2315.200000  
11,1,2548.392045  
11,1,2803.106383  
11,1,1877.593023  
11,1,2498.493750  
11,1,4532.960938  
11,1,1581.750000  
11,1,85307.500000  
11,1,92888.675000  
11,1,1607.466463  
11,1,7322.625000  
11,1,8558.000000  
11,1,58249.397727  
11,1,3593.333333  
11,1,3971.175000  
11,1,117271.000000  
11,1,1502.475610  
11,1,1916.673077  
11,1,47095.687500  
11,1,16384.125000  
11,1,12186.166667  
11,1,1840.759615  
11,1,128740.853659  
11,1,1863.943548  
11,1,2749.385870  
11,1,7058.000000  
11,1,1638.861111  
11,1,44786.358974  
11,1,2153.804054

11,1,4275.470588  
11,1,43764.042857  
11,1,3998.744681  
11,1,1723.872340  
11,1,1797.888158  
11,1,8464.714286  
11,1,1534.531250  
11,1,3064.234848  
11,1,19405.747024  
11,1,5443.256944  
11,1,4349.990196  
11,1,5844.961039  
11,1,26939.496875  
11,1,2406.202206  
11,1,3531.366667  
11,1,11419.718750  
11,1,4029.434783  
11,1,50769.618750  
11,1,1609.551020  
11,1,80469.043478  
11,1,1630.961538  
11,1,1934.911458  
11,1,82410.845745  
11,1,39119.004310  
11,1,2975.341463  
11,1,3934.000000  
11,1,2281.632812  
11,1,1930.552083  
11,1,2627.845238  
11,1,65761.592105  
11,1,3331.556886  
11,1,21413.979592  
11,1,1938.316860  
11,1,2201.194444  
11,1,2230.155556  
11,1,63934.907895  
11,1,76677.493750  
11,1,2570.420732  
11,1,1770.740132  
11,1,44154.414474  
11,1,41998.825000  
11,1,52431.487179  
11,1,1843.788462  
11,1,36117.916667  
11,1,11250.714286  
11,1,1532.900000  
11,1,12054.630208  
11,1,2109.695122  
11,1,16591.843023  
11,1,1628.850000  
11,1,2515.897727  
11,1,4764.486111  
11,1,9920.993750  
11,1,10699.744186  
11,1,6242.675000  
11,1,2048.867021  
11,1,2116.694853  
11,1,76140.785714  
11,1,5147.727778  
11,1,22978.437500  
11,1,51024.354167  
11,1,7345.414634  
11,1,1895.966981  
11,1,2623.984375  
11,1,1571.904255  
11,1,2415.451389

11,1,21880.336957  
11,1,3964.325472  
11,1,1600.377604  
11,1,61285.540441  
11,1,5371.960227  
11,1,3659.655556  
11,1,7159.431818  
11,1,1960.290816  
11,1,98705.181818  
11,1,30628.217105  
11,1,4330.906250  
11,1,1679.362500  
11,1,4274.458333  
11,1,2447.380682  
11,1,81754.086806  
11,1,15497.770833  
11,1,1543.590909  
11,1,4271.631410  
11,1,79991.539773  
11,1,3238.062500  
11,1,2628.788690  
11,1,2412.261628  
11,1,15984.500000  
11,1,2021.369565  
11,1,1904.477273  
11,1,5256.822581  
11,1,2504.750000  
11,1,2046.250000  
11,1,6284.482143  
11,1,1612.075000  
11,1,1649.469444  
11,1,20592.030612  
11,1,2292.478723  
11,1,58349.445946  
11,1,47068.062500  
11,1,130608.666667  
11,1,1795.239130  
11,1,2139.634615  
11,1,11327.375000  
11,1,4463.026163  
11,1,45062.593750  
11,1,1837.074324  
11,1,2629.322917  
11,1,6082.077778  
11,1,2354.468085  
11,1,48055.318750  
11,1,2109.284091  
11,1,1650.407895  
11,1,69752.346154  
11,1,3279.593750  
11,1,119119.339744  
11,1,49234.981061  
11,1,47680.609375  
11,1,10924.722826  
11,1,35537.322581  
11,1,2968.979167  
11,1,1981.041667  
11,1,5329.057692  
11,1,1896.448980  
11,1,2337.945122  
11,1,53123.440972  
11,1,46948.656250  
11,1,17767.317073  
11,1,1683.868263  
11,1,2164.695122  
11,1,2188.034884

11,1,6968.337838  
11,1,105575.539062  
11,1,31329.002976  
11,1,51265.055556  
11,1,11454.307065  
11,1,6039.597222  
11,1,3711.023256  
11,1,5051.277778  
11,1,1759.308824  
11,1,7638.886364  
11,1,2425.302632  
11,1,1676.394531  
11,1,2540.997222  
11,1,1623.410156  
11,1,2101.406250  
11,1,37239.460526  
11,1,12650.617647  
11,1,3040.375000  
11,1,89054.087500  
11,1,5621.023256  
11,1,34600.850543  
11,1,1500.642442  
11,1,69748.789474  
11,1,2268.553191  
11,1,2837.121711  
11,1,52186.269231  
11,1,39713.121324  
11,1,3115.975543  
11,1,3283.343085  
11,1,2190.142857  
11,1,2113.488372  
11,1,29614.137500  
11,1,2300.861111  
11,1,1624.279070  
11,1,3568.852941  
11,1,1597.190476  
11,1,1927.000000  
11,1,59033.539634  
11,1,29043.209559  
11,1,2733.292969  
11,1,3312.138587  
11,1,196310.032895  
11,1,2086.093023  
11,1,1701.319444  
11,1,55852.256410  
11,1,17538.813953  
11,1,3719.484375  
11,1,1671.219512  
11,1,29926.854167  
11,1,1749.987179  
11,1,11283.446429  
11,1,3768.534574  
11,1,72119.641892  
11,1,58916.000000  
11,1,59713.048780  
11,1,3905.488636  
11,1,5855.574405  
11,1,2759.287500  
11,1,22402.414216  
11,1,3710.587209  
11,1,13136.109043  
11,1,79924.363636  
11,1,11579.909091  
11,1,1815.788462  
11,1,23965.755000  
11,1,3402.000000

11,1,9023.342857  
11,1,6721.443878  
11,1,2432.465909  
11,1,33100.153061  
11,1,48966.250000  
11,1,56836.604651  
11,1,3583.682927  
11,1,64616.426471  
11,1,34551.756757  
11,1,4331.025568  
11,1,52916.930233  
11,1,73698.604651  
11,1,22718.603774  
11,1,4056.263298  
11,1,5008.909091  
11,1,15379.186047  
11,1,2305.750000  
11,1,84039.176136  
11,1,3781.250000  
11,1,1627.694853  
11,1,1586.435897  
11,1,6827.631579  
11,1,24865.275000  
11,1,1730.000000  
11,1,1848.212500  
11,1,3122.969697  
11,1,3797.633929  
11,1,1744.507143  
11,1,98927.059375  
11,1,1785.811111  
11,1,31779.054348  
11,1,2112.477273  
11,1,1861.291667  
11,1,1580.112500  
11,1,5848.924242  
11,1,4911.734375  
11,1,126137.146341  
11,1,81489.451220  
11,1,52290.942308  
11,1,17232.198718  
11,1,29682.312500  
11,1,1792.718750  
11,1,31262.600000  
11,1,1644.040441  
11,1,1696.006250  
11,1,2140.261111  
11,1,2110.678571  
11,1,11498.399038  
11,1,5672.507353  
11,1,2022.233696  
11,1,1778.936047  
11,1,9917.343750  
11,1,1803.166667  
11,1,1514.195946  
11,1,141639.649510  
11,1,20742.308824  
11,1,1620.488095  
11,1,3760.311047  
11,1,62278.601351  
11,1,53623.378472  
11,1,20854.735294  
11,1,2167.468750  
11,1,2737.169643  
11,1,116456.407895  
11,1,1772.107143  
11,1,1599.550000

11,1,1725.909483  
11,1,14960.940217  
11,1,3985.000000  
11,1,39710.522727  
11,1,7575.731383  
11,1,3249.700000  
11,1,4465.045455  
11,1,7026.344388  
11,1,6488.610294  
11,1,2384.500000  
11,1,1980.244186  
11,1,5512.446429  
11,1,1957.656977  
11,1,6843.741477  
11,1,2095.687500  
11,1,1566.812500  
11,1,19456.605263  
11,1,63505.817568  
11,1,5245.506098  
11,1,7017.839286  
11,1,3790.662879  
11,1,2690.631250  
11,1,59008.715278  
11,1,2974.364796  
11,1,88002.296875  
11,1,2221.287791  
11,1,5925.000000  
11,1,38663.771429  
11,1,1590.809211  
11,1,3847.575658  
11,1,6544.568452  
11,1,32575.043103  
11,1,3368.125000  
11,1,3467.625000  
11,1,43908.900000  
11,1,2411.821429  
11,1,4089.860294  
11,1,34707.905405  
11,1,78311.117857  
11,1,4341.210227  
11,1,2890.073171  
11,1,3097.258721  
11,1,3075.284574  
11,1,1585.204545  
11,1,54350.465909  
11,1,1906.596154  
11,1,6059.375000  
11,1,25399.875000  
11,1,1771.761905  
11,1,54442.000000  
11,1,2388.916667  
11,1,1587.069149  
11,1,3015.482955  
11,1,1635.589286  
11,1,14074.686275  
11,1,7919.482558  
11,1,1702.055556  
11,1,19529.400000  
11,1,1564.418605  
11,1,2079.285714  
11,1,5875.608696  
11,1,27168.202586  
11,1,5045.235119  
11,1,1978.534091  
11,1,1516.663265  
11,1,1603.025862

11,1,2455.272727  
11,1,6555.778061  
11,1,115934.615385  
11,1,2094.375000  
11,1,2785.776596  
11,1,4147.921875  
11,1,2659.805851  
11,1,3506.930233  
11,1,46408.314103  
11,1,2789.200000  
11,1,2108.590909  
11,1,3305.560976  
11,1,1554.437500  
11,1,1599.602564  
11,1,2404.967949  
11,1,54955.045455  
11,1,3292.072222  
11,1,135248.052326  
11,1,2617.180921  
11,1,1613.137195  
11,1,2417.620000  
11,1,1522.628205  
11,1,8152.932377  
11,1,17839.433511  
11,1,17224.477500  
11,1,1814.543478  
11,1,39001.406250  
11,1,1551.768750  
11,1,2983.434783  
11,1,6683.111842  
11,1,46789.533784  
11,1,58619.000000  
11,1,4132.973214  
11,1,92112.980263  
11,1,82351.607143  
11,1,2125.723837  
11,1,2288.812500  
11,1,2320.575758  
11,1,3190.375000  
11,1,5226.410000  
11,1,1766.256757  
11,1,8356.683673  
11,1,3998.232558  
11,1,32820.929688  
11,1,10674.543478  
11,1,2100.419643  
11,1,5869.172222  
11,1,38739.622093  
11,1,39260.347826  
11,1,1600.891026  
11,1,54898.596429  
11,1,1719.086957  
11,1,15232.862500  
11,1,80691.764706  
11,1,1983.616071  
11,1,3373.210938  
11,1,1776.529412  
11,1,32747.741279  
11,1,43795.363281  
11,1,1627.944444  
11,1,35609.838710  
11,1,3013.732558  
11,1,48253.522436  
11,1,3770.125000  
11,1,2584.500000  
11,1,6441.375000

11,1,32783.158537  
11,1,7412.552632  
11,1,5406.122449  
11,1,1510.140957  
11,1,16225.462500  
11,1,1692.500000  
11,1,2178.767442  
11,1,1526.065217  
11,1,2868.468750  
11,1,29420.149038  
11,1,6574.397436  
11,1,2074.812500  
11,1,6535.250000  
11,1,3191.953804  
11,1,1786.912791  
11,1,48717.166667  
11,1,3058.233533  
11,1,3389.628571  
11,1,74843.357639  
11,1,3010.343750  
11,1,1704.215686  
11,1,23054.050000  
11,1,3189.000000  
11,1,4479.375000  
11,1,7683.540625  
11,1,3092.170000  
11,1,1882.610465  
11,1,26893.558824  
11,1,1517.197674  
11,1,5738.348837  
11,1,2058.162500  
11,1,39227.839286  
11,1,3316.984375  
11,1,3793.673077  
11,1,8068.500000  
11,1,8145.186047  
11,1,3797.207386  
11,1,1759.441489  
11,1,8637.354839  
11,1,5093.205128  
11,1,14340.326797  
11,1,11112.721591  
11,1,2160.825000  
11,1,3244.540625  
11,1,3451.351351  
11,1,2592.575658  
11,1,2589.978723  
11,1,16813.389706  
11,1,104622.509615  
11,1,1551.109375  
11,1,93359.615385  
11,1,2705.647059  
11,1,3940.348837  
11,1,70050.559524  
11,1,2360.690789  
11,1,4051.695652  
11,1,2601.000000  
11,1,12764.400000  
11,1,7630.127660  
11,1,1813.500000  
11,1,83356.429054  
11,1,2807.420732  
11,1,2202.289474  
11,1,1567.142045  
11,1,1713.178571  
11,1,7364.715909

11,1,4344.381579  
11,1,1525.593750  
11,1,3441.948529  
11,1,1545.477273  
11,1,2625.328125  
11,1,3808.090909  
11,1,6279.102041  
11,1,23683.057692  
11,1,2217.648936  
11,1,13935.588235  
11,1,1956.750000  
11,1,2052.307692  
11,1,1643.359375  
11,1,1548.906977  
11,1,1661.580357  
11,1,3687.040816  
11,1,2362.312500  
11,1,10878.039474  
11,1,28650.935714  
11,1,62990.408537  
11,1,1624.756757  
11,1,3978.980978  
11,1,4216.336538  
11,1,109250.608974  
11,1,1656.851064  
11,1,2577.567073  
11,1,22180.798077  
11,1,48832.831395  
11,1,3409.637500  
11,1,4577.657407  
11,1,16917.545455  
11,1,3407.653846  
11,1,2730.440000  
11,1,2329.658784  
11,1,2261.570513  
11,1,4006.017857  
11,1,1507.162234  
11,1,61738.662162  
11,1,2567.357143  
11,1,3333.031915  
11,1,2665.075521  
11,1,3971.556250  
11,1,75139.590909  
11,1,1636.611111  
11,1,20580.625000  
11,1,2973.676471  
11,1,4173.730769  
11,1,25311.086957  
11,1,2563.156977  
11,1,1564.067935  
11,1,4001.809524  
11,1,28949.180556  
11,1,1596.788690  
11,1,4096.662791  
11,1,44679.841463  
11,1,4772.338542  
11,1,5637.738636  
11,1,31723.356618  
11,1,2356.503125  
11,1,70436.666667  
11,1,1695.468085  
11,1,2689.781250  
11,1,2357.787234  
11,1,57544.287037  
11,1,34715.065789  
11,1,177420.192073

11,1,2065.576923  
11,1,2929.266667  
11,1,2357.423913  
11,1,3160.029891  
11,1,30251.439655  
11,1,76255.682692  
11,1,4068.023810  
11,1,3403.659091  
11,1,90467.236111  
11,1,2102.978261  
11,1,114538.188889  
11,1,132820.582500  
11,1,2356.773438  
11,1,3794.505319  
11,1,13395.750000  
11,1,24853.578947  
11,1,2708.855978  
11,1,31681.415541  
11,1,1642.009868  
11,1,66289.250000  
11,1,196837.773585  
11,1,2822.500000  
11,1,4354.669492  
11,1,4320.488889  
11,1,4629.529070  
11,1,26197.647059  
11,1,55222.103070  
11,1,42265.242647  
11,1,2016.045455  
11,1,1558.551282  
11,1,70797.000000  
11,1,42136.385135  
11,1,4682.641447  
11,1,16985.918605  
11,1,5854.649510  
11,1,16428.076087  
11,1,74029.093750  
11,1,2242.804878  
11,1,3109.422619  
11,1,3029.323529  
11,1,5999.150000  
11,1,2008.561224  
11,1,6042.088235  
11,1,83998.522059  
11,1,2051.697674  
11,1,1664.013514  
11,1,1539.000000  
11,1,67288.384615  
11,1,75699.246622  
11,1,2522.500000  
11,1,3015.614362  
11,1,4398.962500  
11,1,3126.272727  
11,1,39399.692308  
11,1,5756.005814  
11,1,1960.868421  
11,1,2233.733333  
11,1,2034.207447  
11,1,4319.937500  
11,1,2074.656250  
11,1,4829.571429  
11,1,1896.837209  
11,1,1807.022222  
11,1,79847.571429  
11,1,4312.727273  
11,1,53093.503125

11,1,3946.362500  
11,1,70437.110465  
11,1,43825.871795  
11,1,4970.559783  
11,1,2726.250000  
11,1,4221.292969  
11,1,126084.701705  
11,1,1632.080000  
11,1,48558.743590  
11,1,5546.348485  
11,1,26601.682432  
11,1,122400.240854  
11,1,1876.756944  
11,1,2061.896552  
11,1,32432.457143  
11,1,7220.560000  
11,1,1774.833333  
11,1,4320.650000  
11,1,13025.096875  
11,1,2028.964286  
11,1,5818.125000  
11,1,6039.750000  
11,1,2995.504032  
11,1,13546.155000  
11,1,1984.375000  
11,1,98318.250000  
11,1,4467.003125  
11,1,1521.601852  
11,1,1686.878125  
11,1,29073.871795  
11,1,8804.142857  
11,1,1805.570000  
11,1,52271.128049  
11,1,6412.048780  
11,1,2277.843750  
11,1,1974.138889  
11,1,94647.283019  
11,1,5524.000000  
11,1,1699.530000  
11,1,1554.976190  
11,1,2683.400000  
11,1,88268.712838  
11,1,22048.727941  
11,1,1522.937500  
11,1,9801.750000  
11,1,44190.200000  
11,1,3274.783088  
11,1,6232.774390  
11,1,62600.588235  
11,1,94756.394231  
11,1,2060.158088  
11,1,1973.794872  
11,1,72585.378378  
11,1,22553.257353  
11,1,1627.782143  
11,1,3717.232143  
11,1,1896.125000  
11,1,1552.866477  
11,1,1501.916667  
11,1,2412.446809  
11,1,1543.875000  
11,1,2592.494681  
11,1,25847.200000  
11,1,6526.205882  
11,1,1847.569079  
11,1,4824.639535

11,1,1513.987179  
11,1,62560.750000  
11,1,2917.554878  
11,1,1797.956395  
11,1,2376.955882  
11,1,1559.319079  
11,1,142369.783537  
11,1,1697.350610  
11,1,13336.454545  
11,1,2371.377604  
11,1,2370.795455  
11,1,3039.323529  
11,1,80893.488889  
11,1,5416.238636  
11,1,1971.704545  
11,1,4066.154255  
11,1,24424.969512  
11,1,3298.913043  
11,1,93775.352273  
11,1,14369.069767  
11,1,2574.500000  
11,1,18468.412500  
11,1,54442.344595  
11,1,2569.943750  
11,1,28643.003676  
11,1,35334.375000  
11,1,3670.169872  
11,1,49681.656250  
11,1,7139.147727  
11,1,9767.932927  
11,1,1810.133333  
11,1,1991.818182  
11,1,59033.210526  
11,1,1875.219512  
11,1,3114.442857  
11,1,2688.937500  
11,1,2372.350649  
11,1,2511.496795  
11,1,2339.585227  
11,1,3586.559659  
11,1,8165.441489  
11,1,2481.364286  
11,1,2453.459239  
11,1,21999.952206  
11,1,73410.152027  
11,1,3138.412234  
11,1,1850.386364  
11,1,23567.668605  
11,1,1815.000000  
11,1,3321.975000  
11,1,28326.040698  
11,1,7870.238372  
11,1,1907.053977  
11,1,2603.615385  
11,1,61088.500000  
11,1,14502.773810  
11,1,9267.437500  
11,1,7178.756757  
11,1,3441.634146  
11,1,3453.290698  
11,1,3071.775641  
11,1,1544.875000  
11,1,4085.964744  
11,1,59159.730263  
11,1,2774.395349  
11,1,8264.473404

11,1,2004.315789  
11,1,1584.391304  
11,1,3652.144737  
11,1,1749.500000  
11,1,2058.029762  
11,1,4573.846154  
11,1,1678.184375  
11,1,1937.810811  
11,1,1755.268750  
11,1,3561.406977  
11,1,1537.382653  
11,1,3895.875000  
11,1,2943.044271  
11,1,1943.521341  
11,1,1872.022727  
11,1,7966.934375  
11,1,1730.357955  
11,1,10404.851190  
11,1,1874.000000  
11,1,36520.101351  
11,1,5017.435714  
11,1,3037.900000  
11,1,1670.492021  
11,1,2452.131757  
11,1,10765.107143  
11,1,17888.517857  
11,1,1818.062500  
11,1,1537.000000  
11,1,4637.196809  
11,1,5645.915625  
11,1,2427.375000  
11,1,9046.728125  
11,1,16324.758621  
11,1,165154.186047  
11,1,5699.522727  
11,1,28472.676471  
11,1,4454.928571  
11,1,3703.685714  
11,1,2862.496711  
11,1,34870.780405  
11,1,2440.603448  
11,1,56856.545455  
11,1,6339.685000  
11,1,1834.078947  
11,1,99095.713415  
11,1,144054.865854  
11,1,100139.076923  
11,1,53737.562500  
11,1,153161.000000  
11,1,51649.421053  
11,1,73018.094595  
11,1,6277.032258  
11,1,4058.170732  
11,1,2077.591912  
11,1,47289.000000  
11,1,5346.213235  
11,1,2479.145833  
11,1,1769.485119  
11,1,68397.403846  
11,1,63517.000000  
11,1,28544.079545  
11,1,26755.093750  
11,1,1763.014535  
11,1,1529.807432  
11,1,96305.755682  
11,1,4470.946429

11,1,4684.204545  
11,1,1555.145833  
11,1,7370.456522  
11,1,19372.216216  
11,1,14009.375000  
11,1,96454.405405  
11,1,4962.331395  
11,1,17440.156250  
11,1,2624.912791  
11,1,2541.848039  
11,1,1598.578125  
11,1,59337.746711  
11,1,2635.575000  
11,1,2245.571429  
11,1,3075.572222  
11,1,6229.841463  
11,1,1838.062500  
11,1,2904.837121  
11,1,19436.368421  
11,1,24057.986111  
11,1,196480.250000  
11,1,33600.761364  
11,1,1734.875000  
11,1,2785.516129  
11,1,5503.342105  
11,1,20438.625000  
11,1,1583.125000  
11,1,4550.892857  
11,1,2399.400000  
11,1,4703.541667  
11,1,1627.302632  
11,1,1794.400000  
11,1,2358.198171  
11,1,4834.831395  
11,1,2360.669444  
11,1,6239.224432  
11,1,7628.500000  
11,1,2864.643293  
11,1,36913.726974  
11,1,68122.851351  
11,1,41170.503676  
11,1,1639.690625  
11,1,6196.565217  
11,1,1540.822917  
11,1,1883.984375  
11,1,35745.533088  
11,1,10182.320513  
11,1,2076.256410  
11,1,25844.421053  
11,1,60458.230769  
11,1,118488.979167  
11,1,4365.946429  
11,1,151368.585526  
11,1,4231.036585  
11,1,1766.708333  
11,1,64050.578947  
11,1,4002.818182  
11,1,1898.269737  
11,1,4172.294643  
11,1,4447.864865  
11,1,7106.666667  
11,1,3795.117647  
11,1,2367.853659  
11,1,56157.027027  
11,1,3111.260638  
11,1,3225.210227

11,1,5144.966667  
11,1,1985.230769  
11,1,1848.627778  
11,1,8568.360119  
11,1,137701.808140  
11,1,2842.688889  
11,1,1540.496795  
11,1,65481.000000  
11,1,1909.259434  
11,1,11358.463235  
11,1,4767.062500  
11,1,1974.278846  
11,1,2603.755556  
11,1,2908.100000  
11,1,74796.197368  
11,1,1662.081633  
11,1,12683.361842  
11,1,72051.425595  
11,1,2042.143229  
11,1,1581.371429  
11,1,1815.936170  
11,1,3662.743590  
11,1,1602.651163  
11,1,155121.127315  
11,1,7264.981250  
11,1,125014.219512  
11,1,68078.575581  
11,1,1519.884146  
11,1,6261.830556  
11,1,7294.904762  
11,1,1819.591837  
11,1,1652.169118  
11,1,3254.564286  
11,1,9708.406977  
11,1,4023.869565  
11,1,1537.625000  
11,1,7924.218750  
11,1,3684.933333  
11,1,1601.921196  
11,1,2603.482955  
11,1,16632.793210  
11,1,76130.108974  
11,1,1653.969697  
11,1,53194.657895  
11,1,8336.718750  
11,1,9895.700000  
11,1,2496.500000  
11,1,2412.729730  
11,1,126632.062500  
11,1,26439.594595  
11,1,18617.717391  
11,1,2286.825581  
11,1,24955.670732  
11,1,17517.425926  
11,1,3039.820000  
11,1,22710.586538  
11,1,3431.880814  
11,1,3845.828125  
11,1,8501.111111  
11,1,1771.309783  
11,1,5194.500000  
11,1,8432.257812  
11,1,3027.706250  
11,1,115038.223404  
11,1,113220.445652  
11,1,5719.803571

11,1,114075.862745  
11,1,1555.875000  
11,1,9361.541667  
11,1,2009.000000  
11,1,54915.143382  
11,1,3507.916667  
11,1,2577.447368  
11,1,2796.232143  
11,1,49545.291667  
11,1,88729.478261  
11,1,12792.479167  
11,1,5257.223404  
11,1,2872.863636  
11,1,10495.848837  
11,1,1572.555851  
11,1,3705.290698  
11,1,66740.131579  
11,1,178743.015625  
11,1,97029.194444  
11,1,7980.408019  
11,1,4531.144737  
11,1,1941.195652  
11,1,1875.795918  
11,1,2269.230769  
11,1,77136.097561  
11,1,94347.398810  
11,1,4092.857143  
11,1,59320.425532  
11,1,79875.398810  
11,1,44940.666667  
11,1,3468.095238  
11,1,1514.166667  
11,1,2004.750000  
11,1,75373.851974  
11,1,2964.062500  
11,1,5107.258929  
11,1,48962.657895  
11,1,4369.994792  
11,1,1777.165625  
11,1,1530.538462  
11,1,2595.933140  
11,1,3497.155488  
11,1,8930.336207  
11,1,19153.426829  
11,1,24189.157609  
11,1,2459.974359  
11,1,6441.234043  
11,1,28374.086538  
11,1,55262.657895  
11,1,2139.531915  
11,1,2288.736842  
11,1,9913.317073  
11,1,21585.359375  
11,1,2104.059524  
11,1,2268.608553  
11,1,4386.402439  
11,1,92774.109375  
11,1,1639.725000  
11,1,3303.205000  
11,1,1522.471154  
11,1,1828.963415  
11,1,1507.750000  
11,1,3139.411765  
11,1,1501.426136  
11,1,49905.666667  
11,1,75070.850000

11,1,32538.324324  
11,1,3112.108696  
11,1,1966.581395  
11,1,1843.255435  
11,1,1705.968750  
11,1,2882.718750  
11,1,1935.571429  
11,1,2627.907895  
11,1,1913.644886  
11,1,3610.760417  
11,1,4173.318182  
11,1,51964.073620  
11,1,12101.217105  
11,1,2613.176829  
11,1,1876.585937  
11,1,5696.203947  
11,1,2655.821970  
11,1,12912.563830  
11,1,58583.060811  
11,1,2612.142857  
11,1,44181.156250  
11,1,29562.686047  
11,1,1578.132653  
11,1,1713.843085  
11,1,1617.762500  
11,1,12861.588889  
11,1,20080.846154  
11,1,1866.067568  
11,1,66832.291667  
11,1,149297.750000  
11,1,133164.909091  
11,1,1567.880952  
11,1,51024.659722  
11,1,2782.358491  
11,1,30474.406250  
11,1,4312.750000  
11,1,81701.698718  
11,1,1771.250000  
11,1,2526.468085  
11,1,10376.764706  
11,1,5465.883152  
11,1,27255.712121  
11,1,1925.276042  
11,1,42529.203125  
11,1,3015.577500  
11,1,19458.394737  
11,1,96851.993902  
11,1,1859.703125  
11,1,2448.357955  
11,1,3988.384615  
11,1,2103.219512  
11,1,4710.440476  
11,1,1949.242347  
11,1,6504.250000  
11,1,1805.134615  
11,1,13367.870968  
11,1,2824.521739  
11,1,3272.700000  
11,1,1500.953125  
11,1,4685.462838  
11,1,1503.562500  
11,1,56401.818182  
11,1,3342.980978  
11,1,4468.111111  
11,1,84896.057692  
11,1,14861.215909

11,1,1835.963889  
11,1,12316.930233  
11,1,2538.795918  
11,1,1732.756579  
11,1,1843.394231  
11,1,9616.941176  
11,1,3677.272059  
11,1,9446.344444  
11,1,4683.821809  
11,1,94431.923913  
11,1,14442.682143  
11,1,2925.595238  
11,1,143449.145833  
11,1,1940.046875  
11,1,4685.903409  
11,1,3632.884615  
11,1,2836.136628  
11,1,1668.500000  
11,1,1836.811170  
11,1,1633.687500  
11,1,7208.541667  
11,1,4328.218750  
11,1,2987.730769  
11,1,5069.304054  
11,1,3630.617647  
11,1,4879.478448  
11,1,57741.032258  
11,1,1510.215190  
11,1,1737.807692  
11,1,78704.842105  
11,1,2232.613636  
11,1,2798.779255  
11,1,2303.164634  
11,1,57147.886364  
11,1,120245.219697  
11,1,2172.114286  
11,1,4653.270349  
11,1,5038.394737  
11,1,5274.312500  
11,1,2450.195652  
11,1,2958.605263  
11,1,7348.687500  
11,1,8798.162500  
11,1,3026.728723  
11,1,4613.002660  
11,1,7368.118243  
11,1,49774.750000  
11,1,90865.432927  
11,1,2253.100000  
11,1,1645.990000  
11,1,38224.491667  
11,1,48008.733333  
11,1,9818.008333  
11,1,1655.987805  
11,1,1712.984756  
11,1,2984.957447  
11,1,1617.728261  
11,1,33961.600000  
11,1,1595.163462  
11,1,12577.458333  
11,1,12037.739362  
11,1,2172.250000  
11,1,72595.702703  
11,1,1710.191489  
11,1,2098.976190  
11,1,4968.562500

11,1,1601.128125  
11,1,3552.345745  
11,1,72598.786184  
11,1,81828.661932  
11,1,27917.264706  
11,1,1502.432927  
11,1,24723.128378  
11,1,3147.137195  
11,1,4194.298295  
11,1,1746.050000  
11,1,2418.445652  
11,1,105771.087838  
11,1,34721.714286  
11,1,57446.780488  
11,1,2121.567308  
11,1,6343.404070  
11,1,1943.288690  
11,1,4546.490741  
11,1,35306.205882  
11,1,2369.085106  
11,1,15120.038462  
11,1,2334.098684  
11,1,30275.225000  
11,1,14109.564655  
11,1,2664.351351  
11,1,1741.660377  
11,1,4500.535714  
11,1,20010.100000  
11,1,4456.915761  
11,1,8311.235294  
11,1,22740.851064  
11,1,29237.263158  
11,1,13496.227273  
11,1,188707.223214  
11,1,2161.256579  
11,1,2443.859375  
11,1,33463.860465  
11,1,2149.975000  
11,1,1507.022727  
11,1,2076.173913  
11,1,5667.443627  
11,1,4004.052632  
11,1,7457.747159  
11,1,4289.479167  
11,1,1829.633333  
11,1,148564.329545  
11,1,4117.762500  
11,1,4766.577778  
11,1,59399.782895  
11,1,5008.963415  
11,1,2323.618421  
11,1,96146.072368  
11,1,5689.439024  
11,1,1569.486413  
11,1,64655.117647  
11,1,36604.523438  
11,1,1543.294355  
11,1,2993.861413  
11,1,6012.000000  
11,1,3841.000000  
11,1,1783.014286  
11,1,1545.658163  
11,1,1823.186047  
11,1,19915.750000  
11,1,1803.638298  
11,1,3367.000000

11,1,7409.317308  
11,1,1686.911111  
11,1,1548.558824  
11,1,6366.207317  
11,1,2136.241071  
11,1,5094.218750  
11,1,88741.384615  
11,1,1761.071856  
11,1,8888.250000  
11,1,2197.128049  
11,1,2610.244186  
11,1,29820.875000  
11,1,3081.677632  
11,1,5422.670455  
11,1,7789.289474  
11,1,2590.574468  
11,1,2100.775000  
11,1,46055.600000  
11,1,3002.250000  
11,1,1640.850962  
11,1,21580.210526  
11,1,4476.664634  
11,1,5526.664062  
11,1,4997.597222  
11,1,48772.470588  
11,1,23402.142857  
11,1,11969.212500  
11,1,1737.589744  
11,1,48151.016447  
11,1,2512.772727  
11,1,2681.523810  
11,1,2425.230769  
11,1,4343.048780  
11,1,9839.308511  
11,1,4330.043478  
11,1,6569.460227  
11,1,2752.188953  
11,1,2886.926471  
11,1,66042.746528  
11,1,6374.269737  
11,1,37660.850000  
11,1,133354.496951  
11,1,3147.338235  
11,1,4615.540909  
11,1,110623.432692  
11,1,3242.631944  
11,1,1524.024390  
11,1,15688.421875  
11,1,2002.648438  
11,1,9222.945000  
11,1,2039.565476  
11,1,83404.845000  
11,1,2056.541667  
11,1,13599.090909  
11,1,9572.995000  
11,1,4468.395833  
11,1,32045.562500  
11,1,2203.500000  
11,1,11310.975610  
11,1,19741.250000  
11,1,3573.642442  
11,1,116607.465116  
11,1,8656.164062  
11,1,3657.883929  
11,1,7891.152439  
11,1,1740.369898

11,1,2489.343750  
11,1,22652.044118  
11,1,110672.097561  
11,1,2607.965909  
11,1,4348.609756  
11,1,175281.006098  
11,1,2996.923077  
11,1,2789.125000  
11,1,172450.750000  
11,1,5251.243421  
11,1,1760.284722  
11,1,3432.250000  
11,1,153339.419643  
11,1,3238.496324  
11,1,7826.567708  
11,1,2875.996875  
11,1,1637.597500  
11,1,4055.298780  
11,1,2006.266447  
11,1,1619.903226  
11,1,1825.344512  
11,1,1775.000000  
11,1,16385.637500  
11,1,1895.110465  
11,1,1709.942308  
11,1,2465.601190  
11,1,2184.696970  
11,1,44613.117647  
11,1,57865.589744  
11,1,18487.784091  
11,1,2294.002717  
11,1,1738.663043  
11,1,73904.570652  
11,1,2198.142045  
11,1,4618.307292  
11,1,2028.218750  
11,1,25353.613636  
11,1,3135.375000  
11,1,3586.125000  
11,1,2726.132353  
11,1,1743.265244  
11,1,34683.150000  
11,1,7252.800000  
11,1,3862.947368  
11,1,2689.416667  
11,1,2449.359375  
11,1,4471.125000  
11,1,2032.593750  
11,1,65148.694767  
11,1,10844.756579  
11,1,1795.194767  
11,1,1830.583333  
11,1,3835.187500  
11,1,2611.312500  
11,1,1998.065104  
11,1,2010.673913  
11,1,2675.660714  
11,1,81394.886628  
11,1,48030.472222  
11,1,1641.800000  
11,1,2670.542553  
11,1,1506.340426  
11,1,3290.483696  
11,1,6933.089744  
11,1,73883.343023  
11,1,102206.282609

11,1,2126.085366  
11,1,2717.166667  
11,1,5092.957317  
11,1,4114.552632  
11,1,7140.695122  
11,1,2401.955882  
11,1,17177.764205  
11,1,3137.540541  
11,1,113309.980645  
11,1,2873.474359  
11,1,19652.609375  
11,1,4448.408163  
11,1,3558.323529  
11,1,101989.551282  
11,1,1687.000000  
11,1,8023.073171  
11,1,4015.962963  
11,1,37438.973404  
11,1,1848.250000  
11,1,1754.500000  
11,1,39160.750000  
11,1,41320.062500  
11,1,2758.354839  
11,1,1503.206250  
11,1,3123.346774  
11,1,7943.816327  
11,1,1549.408333  
11,1,1987.875000  
11,1,16158.674342  
11,1,1546.930556  
11,1,14658.781250  
11,1,6436.244444  
11,1,112106.500000  
11,1,60397.442073  
11,1,8744.032895  
11,1,10705.674020  
11,1,23494.358108  
11,1,28354.025568  
11,1,4760.247340  
11,1,3403.875000  
11,1,1578.306122  
11,1,4376.346154  
11,1,1941.076923  
11,1,1729.642857  
11,1,8128.843750  
11,1,89773.687500  
11,1,3959.285714  
11,1,46172.680921  
11,1,1758.300000  
11,1,5352.390957  
11,1,148622.875000  
11,1,1809.358553  
11,1,66357.288194  
11,1,2520.442073  
11,1,3670.912500  
11,1,4305.806818  
11,1,2238.276786  
11,1,44684.941176  
11,1,1748.698864  
11,1,1850.977273  
11,1,1659.018229  
11,1,1553.117647  
11,1,2386.901163  
11,1,32488.955645  
11,1,10803.607558  
11,1,33834.953488

11,1,2756.762500  
11,1,1725.388298  
11,1,2774.183824  
11,1,2518.562500  
11,1,3059.191489  
11,1,1569.170213  
11,1,1732.977778  
11,1,11404.366071  
11,1,2465.869318  
11,1,1804.426724  
11,1,3387.104651  
11,1,25031.773810  
11,1,144977.681818  
11,1,2229.343750  
11,1,2878.750000  
11,1,1758.643293  
11,1,2176.255435  
11,1,21765.798913  
11,1,2022.909722  
11,1,2288.278409  
11,1,4226.370000  
11,1,1639.577703  
11,1,39824.479730  
11,1,42942.859756  
11,1,2616.771277  
11,1,170757.937500  
11,1,1689.968750  
11,1,1652.642857  
11,1,189406.891304  
11,1,4786.119565  
11,1,2280.697674  
11,1,2468.782609  
11,1,2016.227273  
11,1,2532.902174  
11,1,1929.888889  
11,1,93195.594595  
11,1,2668.073718  
11,1,1613.448529  
11,1,34459.967105  
11,1,31487.960938  
11,1,33968.821875  
11,1,4841.803977  
11,1,48860.482143  
11,1,2049.928571  
11,1,54489.391447  
11,1,5780.740000  
11,1,5434.452128  
11,1,2514.250000  
11,1,5352.566667  
11,1,2173.034884  
11,1,8280.661932  
11,1,2051.326923  
11,1,12975.279605  
11,1,3678.591667  
11,1,3606.904762  
11,1,14207.552632  
11,1,3892.730769  
11,1,51352.667763  
11,1,146971.666667  
11,1,30258.000000  
11,1,3400.447222  
11,1,3801.386364  
11,1,8552.489583  
11,1,41634.750000  
11,1,3084.125000  
11,1,2544.133523

11,1,2437.145833  
11,1,1959.408784  
11,1,24209.227273  
11,1,59161.182432  
11,1,14614.978659  
11,1,1820.257353  
11,1,6169.000000  
11,1,1668.387500  
11,1,51052.054054  
11,1,1937.525000  
11,1,88229.519231  
11,1,10299.238636  
11,1,22008.758523  
11,1,2737.029762  
11,1,69084.185714  
11,1,3962.378378  
11,1,5090.685976  
11,1,1600.231707  
11,1,2399.495000  
11,1,1799.914894  
11,1,2888.497283  
11,1,16111.901042  
11,1,1882.135135  
11,1,7778.560976  
11,1,3636.484375  
11,1,1554.933824  
11,1,1661.368243  
11,1,5773.299342  
11,1,5347.883333  
11,1,2100.516304  
11,1,29229.555556  
11,1,5642.345238  
11,1,3170.541667  
11,1,2283.984043  
11,1,2155.760870  
11,1,1501.302326  
11,1,2434.640625  
11,1,3292.353125  
11,1,23010.066176  
11,1,1936.204268  
11,1,6498.200000  
11,1,5612.219512  
11,1,7209.344512  
11,1,5529.900000  
11,1,1527.182927  
11,1,1763.350000  
11,1,5364.125000  
11,1,1550.005208  
11,1,54092.090116  
11,1,28675.197368  
11,1,1527.305556  
11,1,10916.741477  
11,1,1882.807692  
11,1,58826.795455  
11,1,53611.316176  
11,1,5867.750000  
11,1,51173.317073  
11,1,8602.619048  
11,1,8231.408537  
11,1,4205.031250  
11,1,2418.983553  
11,1,4337.045455  
11,1,5818.684896  
11,1,3700.214674  
11,1,4817.406250  
11,1,2382.528409

11,1,3996.265625  
11,1,102836.081250  
11,1,4658.297297  
11,1,15253.604651  
11,1,50964.275000  
11,1,1579.643750  
11,1,1515.713235  
11,1,15435.013587  
11,1,2286.000000  
11,1,64616.867021  
11,1,111693.150000  
11,1,3175.795918  
11,1,2644.306818  
11,1,2501.027778  
11,1,5455.269737  
11,1,78996.416667  
11,1,72852.281250  
11,1,1596.300676  
11,1,2963.897059  
11,1,71851.552083  
11,1,77160.138158  
11,1,4270.250000  
11,1,3089.000000  
11,1,62242.402778  
11,1,11999.000000  
11,1,5171.872093  
11,1,56092.558824  
11,1,2245.875000  
11,1,1919.428571  
11,1,3008.600000  
11,1,2446.731707  
11,1,2037.608974  
11,1,26162.092105  
11,1,2084.125000  
11,1,2186.271341  
11,1,130676.675000  
11,1,9982.709184  
11,1,2324.443750  
11,1,27423.647059  
11,1,72058.544872  
11,1,2110.367347  
11,1,6066.743421  
11,1,1938.960227  
11,1,1609.441860  
11,1,2943.115132  
11,1,2910.393939  
11,1,74199.563830  
11,1,1667.166667  
11,1,1800.427083  
11,1,2058.960526  
11,1,2757.494318  
11,1,7531.267857  
11,1,4552.201389  
11,1,77445.810811  
11,1,55852.315789  
11,1,74382.875000  
11,1,123894.062500  
11,1,5145.520833  
11,1,12224.432927  
11,1,10100.000000  
11,1,69089.852941  
11,1,1518.274390  
11,1,4398.100000  
11,1,51750.119681  
11,1,2569.187500  
11,1,57349.733871

11,1,1511.545139  
11,1,2719.193182  
11,1,90202.405405  
11,1,2305.583333  
11,1,4409.017442  
11,1,4981.057692  
11,1,2125.337209  
11,1,1979.133929  
11,1,1749.184783  
11,1,7317.350610  
11,1,38471.949405  
11,1,38110.324324  
11,1,2833.743902  
11,1,1527.232143  
11,1,4964.134615  
11,1,2422.465909  
11,1,4251.448529  
11,1,44781.205357  
11,1,27156.568966  
11,1,4955.669811  
11,1,1526.758929  
11,1,5323.562500  
11,1,18077.937500  
11,1,3391.355556  
11,1,49748.753906  
11,1,1759.823529  
11,1,1531.721429  
11,1,1658.317308  
11,1,71628.737805  
11,1,58589.517241  
11,1,1713.893293  
11,1,2386.811111  
11,1,2051.133721  
11,1,2231.250000  
11,1,40988.434211  
11,1,1586.821023  
11,1,4341.166667  
11,1,3974.255319  
11,1,22877.686047  
11,1,46461.858108  
11,1,1996.494565  
11,1,3113.360294  
11,1,1688.144444  
11,1,1604.192073  
11,1,3891.702703  
11,1,6111.796875  
11,1,50682.625000  
11,1,56905.570946  
11,1,1873.948718  
11,1,1732.595395  
11,1,2543.517442  
11,1,2372.794872  
11,1,22807.745370  
11,1,1898.159574  
11,1,6391.306122  
11,1,52022.568182  
11,1,4231.257353  
11,1,105540.326087  
11,1,29848.200000  
11,1,2450.542553  
11,1,2267.303977  
11,1,2325.033333  
11,1,1748.234043  
11,1,1768.780488  
11,1,3631.437500  
11,1,31555.610294

11,1,1792.404762  
11,1,8281.467105  
11,1,34796.193182  
11,1,3304.346154  
11,1,1664.939024  
11,1,5636.148936  
11,1,18379.134868  
11,1,3889.027174  
11,1,5680.186170  
11,1,2188.611111  
11,1,142445.185976  
11,1,1799.953804  
11,1,20404.670455  
11,1,7818.986842  
11,1,29127.377907  
11,1,2463.752294  
11,1,8520.676724  
11,1,2318.872449  
11,1,2274.189024  
11,1,4984.536932  
11,1,2993.140625  
11,1,52266.692308  
11,1,1913.250000  
11,1,69049.472561  
11,1,2088.165761  
11,1,2780.775000  
11,1,2059.558333  
11,1,1576.577778  
11,1,4023.625000  
11,1,6777.900000  
11,1,2716.604651  
11,1,2803.500000  
11,1,2750.485000  
11,1,4444.844444  
11,1,2036.813953  
11,1,3152.540625  
11,1,82084.483333  
11,1,1617.000000  
11,1,2291.628049  
11,1,40463.341667  
11,1,2056.970745  
11,1,1740.048295  
11,1,15315.496094  
11,1,1519.551282  
11,1,26110.605469  
11,1,1774.402778  
11,1,2605.023256  
11,1,23422.262500  
11,1,1659.631579  
11,1,1539.045455  
11,1,10844.965116  
11,1,13417.178571  
11,1,3315.168605  
11,1,5353.628289  
11,1,8831.561170  
11,1,1596.619565  
11,1,3764.035714  
11,1,4902.666667  
11,1,1692.285714  
11,1,35950.705882  
11,1,18744.687500  
11,1,1965.644737  
11,1,1587.923780  
11,1,1782.437500  
11,1,32538.619186  
11,1,1775.208333

11,1,2598.378205  
11,1,2359.668919  
11,1,1955.923497  
11,1,1981.293750  
11,1,43747.303571  
11,1,1602.395349  
11,1,127459.923077  
11,1,2165.062500  
11,1,1752.237805  
11,1,35848.721591  
11,1,3141.488636  
11,1,3475.351190  
11,1,2093.893617  
11,1,1721.542683  
11,1,2154.132353  
11,1,4067.733696  
11,1,18887.234043  
11,1,4810.195652  
11,1,4324.408333  
11,1,4470.586538  
11,1,2487.267857  
11,1,1662.298611  
11,1,4669.936170  
11,1,4640.691176  
11,1,3325.855556  
11,1,6298.075000  
11,1,5742.631410  
11,1,1895.315789  
11,1,4335.950000  
11,1,2537.600610  
11,1,6459.307692  
11,1,4733.541667  
11,1,1686.250000  
11,1,1815.717391  
11,1,35447.571429  
11,1,2371.389881  
11,1,4108.875000  
11,1,3965.500000  
11,1,1625.887821  
11,1,56777.064286  
11,1,1678.464286  
11,1,2196.358553  
11,1,37359.350000  
11,1,9850.645833  
11,1,2116.273026  
11,1,2001.625000  
11,1,4860.852564  
11,1,2896.169444  
11,1,4796.932065  
11,1,93402.138889  
11,1,7743.611111  
11,1,96448.437500  
11,1,1819.326220  
11,1,2894.115385  
11,1,5178.582031  
11,1,69820.299342  
11,1,24040.757353  
11,1,7235.897727  
11,1,26594.697279  
11,1,3082.896296  
11,1,9468.722222  
11,1,2505.458333  
11,1,14043.662791  
11,1,1977.095238  
11,1,2590.427419  
11,1,19744.831522

11,1,7520.527778  
11,1,1797.627660  
11,1,1681.573529  
11,1,1640.371429  
11,1,2129.685000  
11,1,24072.243902  
11,1,1609.137019  
11,1,11868.104730  
11,1,3517.121951  
11,1,19283.375000  
11,1,1613.836538  
11,1,6435.333333  
11,1,37580.927632  
11,1,34796.714286  
11,1,2048.418605  
11,1,3971.671053  
11,1,3344.218750  
11,1,88396.953488  
11,1,4308.791667  
11,1,2142.898936  
11,1,1647.723039  
11,1,5937.465625  
11,1,29698.725806  
11,1,8405.762755  
11,1,8856.761905  
11,1,31997.986842  
11,1,4160.965278  
11,1,5073.128289  
11,1,3280.475806  
11,1,1555.500000  
11,1,27639.200000  
11,1,6563.641892  
11,1,2265.647059  
11,1,4372.727273  
11,1,1751.662162  
11,1,80443.085526  
11,1,2775.050000  
11,1,19931.400000  
11,1,5676.317073  
11,1,1579.125000  
11,1,6198.575581  
11,1,2071.465116  
11,1,3602.410256  
11,1,3264.750000  
11,1,13802.459821  
11,1,2538.393293  
11,1,2884.269737  
11,1,14912.286458  
11,1,1567.702128  
11,1,1875.548611  
11,1,3593.375000  
11,1,1948.205128  
11,1,26901.259868  
11,1,2467.900000  
11,1,2261.875000  
11,1,33914.550000  
11,1,17944.125000  
11,1,1961.562500  
11,1,52057.125000  
11,1,2123.611111  
11,1,62699.694079  
11,1,1604.118421  
11,1,67961.201220  
11,1,36714.851351  
11,1,4651.451389  
11,1,3215.139423

11,1,15407.358696  
11,1,1624.250000  
11,1,3218.511111  
11,1,29246.348214  
11,1,61990.420213  
11,1,61677.555556  
11,1,1538.337500  
11,1,1520.936170  
11,1,2993.627660  
11,1,2480.363636  
11,1,1929.443182  
11,1,2105.833333  
11,1,88792.785714  
11,1,59464.564103  
11,1,2590.404891  
11,1,3567.285714  
11,1,23228.844633  
11,1,6153.111486  
11,1,6182.111111  
11,1,2457.284884  
11,1,4912.277174  
11,1,34946.705729  
11,1,51056.739286  
11,1,5581.079545  
11,1,2109.125000  
11,1,85144.901316  
11,1,40946.419643  
11,1,3268.557292  
11,1,7477.675595  
11,1,2620.046875  
11,1,59549.720588  
11,1,19892.043605  
11,1,1709.000000  
11,1,2006.425000  
11,1,5333.000000  
11,1,62034.055556  
11,1,5360.305147  
11,1,107235.091463  
11,1,2078.493243  
11,1,65000.618902  
11,1,4014.800000  
11,1,6996.558673  
11,1,1916.462209  
11,1,28987.259615  
11,1,1765.098214  
11,1,2969.761364  
11,1,48857.454545  
11,1,36119.909091  
11,1,43463.254808  
11,1,2831.812500  
11,1,1674.289894  
11,1,6960.957237  
11,1,1561.450000  
11,1,1592.975610  
11,1,12656.839286  
11,1,12874.912500  
11,1,4099.364130  
11,1,12702.301829  
11,1,2354.372093  
11,1,88745.354167  
11,1,4805.443878  
11,1,1641.357143  
11,1,41524.096257  
11,1,2150.591837  
11,1,50255.551471  
11,1,2207.000000

11,1,9360.358108  
11,1,1891.340909  
11,1,2455.728723  
11,1,29155.083333  
11,1,1519.377604  
11,1,2580.416667  
11,1,1553.357143  
11,1,2007.193182  
11,1,4366.195000  
11,1,65241.913690  
11,1,19843.108108  
11,1,1896.530488  
11,1,3986.168367  
11,1,9722.554687  
11,1,5307.135714  
11,1,4002.464286  
11,1,4741.742647  
11,1,1752.029070  
11,1,100898.836111  
11,1,13100.508621  
11,1,4162.759615  
11,1,1617.406250  
11,1,45218.059211  
11,1,2940.451220  
11,1,2246.043478  
11,1,2325.609756  
11,1,2844.907143  
11,1,1887.078431  
11,1,85219.157895  
11,1,2164.500000  
11,1,160311.209302  
11,1,2241.054054  
11,1,44809.515244  
11,1,4307.349359  
11,1,3883.036932  
11,1,45221.228571  
11,1,36206.734375  
11,1,1884.657895  
11,1,79752.628049  
11,1,31690.023256  
11,1,45143.318182  
11,1,25074.104651  
11,1,95874.414634  
11,1,16511.428571  
11,1,4514.100000  
11,1,1570.102041  
11,1,1987.351064  
11,1,25650.816406  
11,1,2399.392442  
11,1,6732.461538  
11,1,7646.500000  
11,1,3634.869048  
11,1,2688.028571  
11,1,3423.969512  
11,1,1947.613889  
11,1,1712.306548  
11,1,2295.572674  
11,1,1678.581250  
11,1,53616.118421  
11,1,11855.397727  
11,1,29347.250000  
11,1,1962.743421  
11,1,8943.961538  
11,1,7162.147059  
11,1,3903.569149  
11,1,5271.864583

11,1,29310.918367  
11,1,127975.444767  
11,1,2738.446023  
11,1,1686.828947  
11,1,2151.471354  
11,1,1897.234375  
11,1,91682.168605  
11,1,9671.507813  
11,1,2038.285088  
11,1,2811.617188  
11,1,105923.084459  
11,1,3678.588710  
11,1,3516.029412  
11,1,62073.242021  
11,1,31382.954545  
11,1,3332.802326  
11,1,1874.891026  
11,1,4250.199405  
11,1,2733.290625  
11,1,2723.488372  
11,1,3501.058140  
11,1,59096.418605  
11,1,1543.175532  
11,1,45907.129032  
11,1,72733.817308  
11,1,136384.729167  
11,1,4249.407738  
11,1,6201.062500  
11,1,2115.502907  
11,1,1772.057432  
11,1,131180.350610  
11,1,2299.857143  
11,1,3381.090909  
11,1,1975.031250  
11,1,19793.675000  
11,1,2003.871094  
11,1,1909.672619  
11,1,64606.019231  
11,1,1587.833333  
11,1,15769.263889  
11,1,1784.457143  
11,1,2570.000000  
11,1,17175.642857  
11,1,4075.289773  
11,1,6200.244792  
11,1,2176.022727  
11,1,2803.060811  
11,1,4281.382353  
11,1,2192.884868  
11,1,9422.854167  
11,1,1676.216216  
11,1,1910.069767  
11,1,71488.104839  
11,1,3134.170732  
11,1,28697.107143  
11,1,2162.063953  
11,1,2662.732558  
11,1,2273.871795  
11,1,154040.973485  
11,1,1860.554348  
11,1,20286.468085  
11,1,2496.589286  
11,1,3262.298077  
11,1,68776.750000  
11,1,6070.985795  
11,1,2302.922619

11,1,62991.378472  
11,1,6885.354651  
11,1,71615.346154  
11,1,2371.000000  
11,1,1715.673780  
11,1,1763.149457  
11,1,3466.116477  
11,1,1772.338816  
11,1,30647.837838  
11,1,24971.205128  
11,1,2230.183824  
11,1,1861.144886  
11,1,3122.367188  
11,1,1803.253676  
11,1,3860.709559  
11,1,1817.162234  
11,1,3605.425532  
11,1,1559.882353  
11,1,2780.303030  
11,1,3861.807065  
11,1,2101.011628  
11,1,2176.634615  
11,1,2447.500000  
11,1,4982.394531  
11,1,4914.567568  
11,1,1957.622093  
11,1,6696.989286  
11,1,1727.005952  
11,1,3127.636792  
11,1,61079.114286  
11,1,73721.125000  
11,1,69755.783333  
11,1,90113.186047  
11,1,1992.352941  
11,1,3336.906977  
11,1,3108.750000  
11,1,13622.730769  
11,1,54219.925000  
11,1,13546.025000  
11,1,1506.437500  
11,1,3540.225694  
11,1,2059.508929  
11,1,2146.702128  
11,1,18583.645833  
11,1,8743.975610  
11,1,96075.012500  
11,1,22545.764706  
11,1,3808.583333  
11,1,3016.175000  
11,1,3538.255952  
11,1,2967.092391  
11,1,2986.110294  
11,1,3143.724265  
11,1,140554.160256  
11,1,4279.265957  
11,1,6879.462766  
11,1,1698.892500  
11,1,2177.462209  
11,1,5342.503571  
11,1,9461.008333  
11,1,21269.156250  
11,1,2389.192308  
11,1,6924.680851  
11,1,1825.376884  
11,1,1776.500000  
11,1,1985.990854

11,1,46692.545732  
11,1,75795.274390  
11,1,1575.762500  
11,1,2534.905405  
11,1,1533.092105  
11,1,1891.746711  
11,1,1705.826531  
11,1,1982.719512  
11,1,1682.250000  
11,1,1887.426471  
11,1,9326.862500  
11,1,2355.505814  
11,1,1916.756757  
11,1,1737.441489  
11,1,59324.146341  
11,1,16998.488095  
11,1,8582.022727  
11,1,43808.470588  
11,1,2169.357143  
11,1,24438.168750  
11,1,3356.397059  
11,1,1873.330645  
11,1,47305.976744  
11,1,3919.555556  
11,1,8878.956522  
11,1,1779.826705  
11,1,70731.217949  
11,1,84864.500000  
11,1,4043.680851  
11,1,1861.420213  
11,1,4725.933333  
11,1,2123.356250  
11,1,1732.834559  
11,1,2511.062500  
11,1,1612.432692  
11,1,1574.794444  
11,1,2433.247283  
11,1,39804.604651  
11,1,171531.750000  
11,1,2693.565217  
11,1,2940.686170  
11,1,30838.708333  
11,1,30304.636905  
11,1,6303.519886  
11,1,3381.201220  
11,1,68889.192308  
11,1,94239.682927  
11,1,17584.250000  
11,1,10396.468085  
11,1,1554.657143  
11,1,2044.214286  
11,1,2222.991667  
11,1,10311.029762  
11,1,1683.791667  
11,1,1546.485795  
11,1,2042.242647  
11,1,4090.122396  
11,1,1931.461538  
11,1,72617.514493  
11,1,23600.015625  
11,1,5681.614796  
11,1,3937.656250  
11,1,4054.585366  
11,1,39601.875000  
11,1,30055.153846  
11,1,4381.932515

11,1,5501.680556  
11,1,1942.952381  
11,1,2387.352941  
11,1,12174.752315  
11,1,5075.781250  
11,1,1847.604651  
11,1,1678.400000  
11,1,11981.437500  
11,1,3307.400000  
11,1,6411.180000  
11,1,9289.625000  
11,1,42004.112500  
11,1,44745.500000  
11,1,1512.370000  
11,1,2090.791667  
11,1,18360.887755  
11,1,55167.586538  
11,1,89502.821429  
11,1,6522.143750  
11,1,31825.250000  
11,1,3804.914773  
11,1,3263.250000  
11,1,97342.953488  
11,1,51048.875000  
11,1,1887.668750  
11,1,2234.239362  
11,1,38496.613497  
11,1,71578.791667  
11,1,4301.207317  
11,1,66481.137195  
11,1,2158.447222  
11,1,5298.006098  
11,1,4392.888889  
11,1,168736.378125  
11,1,5681.046875  
11,1,76530.571429  
11,1,48997.814394  
11,1,2681.909091  
11,1,114531.539634  
11,1,6663.716216  
11,1,1543.843750  
11,1,157158.006098  
11,1,56282.220395  
11,1,2988.048246  
11,1,35809.596154  
11,1,37485.625000  
11,1,4759.041667  
11,1,56503.774306  
11,1,11665.426471  
11,1,2630.466667  
11,1,1785.380682  
11,1,6254.100000  
11,1,23682.031250  
11,1,3266.949405  
11,1,6193.577381  
11,1,3317.562500  
11,1,3021.437500  
11,1,1771.910256  
11,1,65432.846154  
11,1,10073.808824  
11,1,3178.000000  
11,1,2779.366667  
11,1,11115.843023  
11,1,7472.867647  
11,1,1729.560000  
11,1,4165.366667

11,1,1743.781915  
11,1,2129.531250  
11,1,55374.291667  
11,1,15185.491071  
11,1,2361.536585  
11,1,1706.918919  
11,1,87546.781250  
11,1,5408.527778  
11,1,1502.043478  
11,1,1693.534091  
11,1,2060.440789  
11,1,2977.253049  
11,1,2970.500000  
11,1,1571.538462  
11,1,1606.705882  
11,1,2191.590426  
11,1,29050.975000  
11,1,1678.652174  
11,1,2219.732558  
11,1,18961.820513  
11,1,70862.792553  
11,1,11253.636364  
11,1,1804.234375  
11,1,8930.173077  
11,1,1976.854167  
11,1,9286.750000  
11,1,1978.838235  
11,1,1887.095930  
11,1,1795.513298  
11,1,2094.550000  
11,1,1947.318750  
11,1,2685.133721  
11,1,2306.562500  
11,1,4319.959559  
11,1,2058.333333  
11,1,8494.718750  
11,1,3932.116279  
11,1,64633.537162  
11,1,2095.448370  
11,1,2871.239130  
11,1,2473.079545  
11,1,3861.622642  
11,1,2286.256410  
11,1,2435.058824  
11,1,68765.100000  
11,1,24748.532895  
11,1,1733.704545  
11,1,2232.936224  
11,1,21981.250000  
11,1,2212.927632  
11,1,1964.696970  
11,1,5679.250000  
11,1,5312.212766  
12,2,6376.710784  
12,2,32823.900510  
12,2,7873.836364  
12,2,2061.562500  
12,2,2940.827381  
12,2,5858.450000  
12,2,4715.069444  
12,2,2642.230769  
12,2,4646.708333  
12,2,3878.334184  
12,2,4676.573171  
12,2,5877.113095  
12,2,1677.691176

12,2,1870.200000  
12,2,3140.166667  
12,2,7099.145833  
12,2,1867.850000  
12,2,1671.988636  
12,2,6895.098558  
12,2,1608.340909  
12,2,2956.833333  
12,2,7174.087079  
12,2,1594.212500  
12,2,5935.471591  
12,2,1954.279018  
12,2,8544.760563  
12,2,1656.851190  
12,2,3785.406250  
12,2,3438.977612  
12,2,3893.843137  
12,2,1526.756098  
12,2,2173.034722  
12,2,8422.574468  
12,2,14223.850000  
12,2,2119.536458  
12,2,7325.875000  
12,2,2204.166667  
12,2,2788.268293  
12,2,3787.968750  
12,2,4188.653846  
12,2,1691.653061  
12,2,1948.991667  
12,2,2455.462209  
12,2,1881.125000  
12,2,3118.465909  
12,2,1575.915816  
12,2,1856.953947  
12,2,1582.377500  
12,2,4705.346154  
12,2,4999.274306  
12,2,1911.435897  
12,2,1709.666667  
12,2,6271.332500  
12,2,3312.964674  
12,2,1552.125000  
12,2,3902.807692  
12,2,1920.187500  
12,2,1664.000000  
12,2,1521.968750  
12,2,1644.067308  
12,2,4111.461538  
12,2,3356.256831  
12,2,1798.903846  
12,2,2538.371212  
12,2,2317.975610  
12,2,1823.772727  
12,2,11223.275568  
12,2,39152.044444  
12,2,5276.427083  
12,2,1804.057143  
12,2,1994.936111  
12,2,5588.656250  
12,2,2698.434783  
12,2,6780.533333  
12,2,45170.507576  
12,2,1597.223684  
12,2,4440.976190  
12,2,2222.258152  
12,2,2422.608974

12,2,2063.771277  
12,2,10762.888889  
12,2,3185.875000  
12,2,1793.119048  
12,2,1806.000000  
12,2,3206.704861  
12,2,3556.931034  
12,2,3286.530556  
12,2,2864.204545  
12,2,1953.196809  
12,2,3168.916667  
12,2,2367.187500  
12,2,1664.500000  
12,2,1642.136364  
12,2,10644.240000  
12,2,3282.545455  
12,2,1850.646341  
12,2,3474.583333  
12,2,1588.577703  
12,2,4869.521635  
12,2,6793.112745  
12,2,3567.790541  
12,2,5038.325000  
12,2,1639.156863  
12,2,2468.683511  
12,2,1909.982993  
12,2,1771.191489  
12,2,3803.500000  
12,2,8057.485119  
12,2,1780.534031  
12,2,3312.508772  
12,2,2293.529412  
12,2,3714.142857  
12,2,8297.196429  
12,2,6361.875000  
12,2,1565.293919  
12,2,2673.579545  
12,2,4984.141304  
12,2,4058.393868  
12,2,1906.485294  
12,2,2300.500000  
12,2,1566.911765  
12,2,1546.694712  
12,2,1811.633508  
12,2,2597.357143  
12,2,9891.525714  
12,2,1499.395000  
12,2,5722.947368  
12,2,1963.804348  
12,2,3726.510870  
12,2,2378.710714  
12,2,16478.847222  
12,2,4681.478261  
12,2,2460.943182  
12,2,3308.488636  
12,2,4410.081633  
12,2,2002.500000  
12,2,1601.943182  
12,2,5131.178571  
12,2,2345.100000  
12,2,7414.541667  
12,2,9306.261029  
12,2,3098.984694  
12,2,1623.090278  
12,2,6447.381579  
12,2,8250.310345

12,2,2509.267500  
12,2,4208.662162  
12,2,14575.663043  
12,2,1798.734756  
12,2,3835.776042  
12,2,3573.602273  
12,2,3468.446429  
12,2,2194.157609  
12,2,2043.138889  
12,2,8567.193396  
12,2,2842.441860  
12,2,2955.617788  
12,2,5822.489362  
12,2,2625.000000  
12,2,5625.331522  
12,2,15254.125000  
12,2,132957.375000  
12,2,4796.843137  
12,2,2048.160377  
12,2,3782.747159  
12,2,2304.634146  
12,2,2728.633621  
12,2,4927.945946  
12,2,4605.159091  
12,2,21780.150000  
12,2,2179.101562  
12,2,2431.830729  
12,2,1956.019231  
12,2,2474.994186  
12,2,3213.516588  
12,2,1552.192308  
12,2,2286.016667  
12,2,1607.006757  
12,2,3948.995455  
12,2,11529.091146  
12,2,2373.250000  
12,2,2447.222222  
12,2,7928.000000  
12,2,1552.756757  
12,2,2596.718750  
12,2,4615.535714  
12,2,2733.111702  
12,2,1737.829384  
12,2,4523.916667  
12,2,4457.258929  
12,2,2389.191667  
12,2,1512.949405  
12,2,6895.714286  
12,2,1803.097500  
12,2,1917.578804  
12,2,4948.546875  
12,2,3529.122449  
12,2,2550.510204  
12,2,1736.525000  
12,2,3305.763889  
12,2,6016.776596  
12,2,2388.951923  
12,2,1980.440341  
12,2,11163.423913  
12,2,2724.964286  
12,2,2158.255208  
12,2,1646.063953  
12,2,2513.402439  
12,2,2497.846939  
12,2,1998.182432  
12,2,2541.875000

12,2,3710.313725  
12,2,5732.772959  
12,2,2089.653571  
12,2,5192.963235  
12,2,1999.840361  
12,2,2160.507979  
12,2,2791.396875  
12,2,2319.937500  
12,2,1775.750000  
12,2,2409.263736  
12,2,4825.941667  
12,2,3425.865385  
12,2,3878.185022  
12,2,1795.260870  
12,2,2227.363636  
12,2,9513.390873  
12,2,2284.399038  
12,2,1815.680233  
12,2,2336.537234  
12,2,4060.767773  
12,2,8093.639706  
12,2,2565.812903  
12,2,2963.440217  
12,2,1977.625000  
12,2,4713.552083  
12,2,1666.754902  
12,2,9627.781250  
12,2,3154.610577  
12,2,2409.562500  
12,2,2846.000000  
12,2,2459.507853  
12,2,2371.638393  
12,2,2669.394958  
12,2,9805.353659  
12,2,3074.725191  
12,2,3781.271341  
12,2,1854.779255  
12,2,1885.588710  
12,2,4935.337719  
12,2,14959.619565  
12,2,1681.436170  
12,2,1618.925532  
12,2,10029.583333  
12,2,3082.835526  
12,2,4543.653846  
12,2,5133.386574  
12,2,1976.243243  
12,2,3299.916667  
12,2,1741.919872  
12,2,3073.091463  
12,2,4921.772500  
12,2,2513.275568  
12,2,2484.680851  
12,2,13269.395161  
12,2,1773.392500  
12,2,2156.400000  
12,2,5561.367188  
12,2,6836.680851  
12,2,1890.925000  
12,2,3043.901316  
12,2,3551.089286  
12,2,19190.950000  
12,2,6072.529412  
12,2,2087.583333  
12,2,10160.502717  
12,2,2437.306818

12,2,6605.553241  
12,2,2593.968137  
12,2,3058.887755  
12,2,9706.020833  
12,2,9905.586207  
12,2,8898.176630  
12,2,1782.860465  
12,2,2339.772436  
12,2,60653.637019  
12,2,3594.837500  
12,2,7608.100000  
12,2,2099.375000  
12,2,2045.970588  
12,2,3456.575000  
12,2,2520.668750  
12,2,2203.825000  
12,2,2284.851852  
12,2,1708.470588  
12,2,3532.866667  
12,2,2834.252660  
12,2,2710.545000  
12,2,3875.000000  
12,2,5585.477273  
12,2,1784.255319  
12,2,4026.328125  
12,2,5652.275000  
12,2,5605.133929  
12,2,2577.296053  
12,2,3842.545455  
12,2,1785.265086  
12,2,2263.226415  
12,2,3192.364583  
12,2,3435.826923  
12,2,8095.622159  
12,2,2875.625000  
12,2,1591.947581  
12,2,3174.084906  
12,2,2809.272109  
12,2,2363.957447  
12,2,2757.167763  
12,2,5622.384615  
12,2,2659.603261  
12,2,4923.204545  
12,2,4363.435976  
12,2,1555.176136  
12,2,1590.596154  
12,2,1618.589286  
12,2,1955.584184  
12,2,3770.324561  
12,2,3662.131707  
12,2,7581.290503  
12,2,1535.500000  
12,2,4294.547619  
12,2,3909.994681  
12,2,2203.796512  
12,2,1679.952778  
12,2,2549.086735  
12,2,2944.524554  
12,2,2216.006098  
12,2,1521.525641  
12,2,1665.314516  
12,2,1968.613636  
12,2,11591.075581  
12,2,1653.479730  
12,2,5102.406250  
12,2,10329.451389

12,2,3295.959184  
12,2,4590.851351  
12,2,2307.576389  
12,2,3002.707386  
12,2,9566.647500  
12,2,1613.725000  
12,2,1909.042683  
12,2,4055.752688  
12,2,2276.969512  
12,2,4300.372222  
12,2,2978.184615  
12,2,7447.890244  
12,2,6354.260000  
12,2,1591.515306  
12,2,2088.615000  
12,2,1979.483333  
12,2,2001.120690  
12,2,8917.521930  
12,2,1643.734043  
12,2,4146.595109  
12,2,5975.191489  
12,2,3121.980392  
12,2,2181.845930  
12,2,2868.342105  
12,2,1563.902439  
12,2,1536.171512  
12,2,4186.000000  
12,2,2416.371795  
12,2,1953.250000  
12,2,24369.204545  
12,2,3746.865741  
12,2,2027.716518  
12,2,2129.096591  
12,2,1693.113372  
12,2,4462.539062  
12,2,1740.483333  
12,2,3819.889205  
12,2,2134.068750  
12,2,2989.009259  
12,2,1500.079787  
12,2,1811.773585  
12,2,2358.508772  
12,2,2874.426829  
12,2,4352.619898  
12,2,2199.387931  
12,2,4508.130952  
12,2,4395.976563  
12,2,2393.333333  
12,2,28826.250000  
12,2,2575.166667  
12,2,3204.058333  
12,2,1739.500000  
12,2,1517.403846  
12,2,1672.948864  
12,2,2870.921875  
12,2,3085.352273  
12,2,2728.500000  
12,2,1586.560000  
12,2,3609.081250  
12,2,5248.589286  
12,2,2989.864583  
12,2,3200.396739  
12,2,4063.702830  
12,2,13665.256098  
12,2,2132.500000  
12,2,4181.867347

12,2,1983.285714  
12,2,4067.666667  
12,2,2313.889535  
12,2,31128.777778  
12,2,1525.468750  
12,2,2443.411765  
12,2,1542.064516  
12,2,4924.938953  
12,2,5975.497340  
12,2,3112.855114  
12,2,3372.587766  
12,2,4759.079787  
12,2,1631.821429  
12,2,3501.533854  
12,2,8954.925000  
12,2,6306.033019  
12,2,4559.186404  
12,2,1904.221875  
12,2,1881.397959  
12,2,4415.016393  
12,2,3173.418605  
12,2,1534.125000  
12,2,3528.594388  
12,2,7411.709184  
12,2,2099.671875  
12,2,4876.616279  
12,2,3712.228261  
12,2,1937.552632  
12,2,1768.822917  
12,2,1596.802632  
12,2,3765.468750  
12,2,2139.253695  
12,2,9659.139344  
12,2,7540.552863  
12,2,1548.079295  
12,2,9878.390625  
12,2,1631.011628  
12,2,4369.040000  
12,2,2415.312500  
12,2,1543.195652  
12,2,2826.729167  
12,2,1680.292553  
12,2,1849.448370  
12,2,17645.846154  
12,2,1814.572917  
12,2,5479.250000  
12,2,2408.177083  
12,2,1573.906250  
12,2,1616.390244  
12,2,4871.218750  
12,2,5818.070652  
12,2,6602.826271  
12,2,2198.916667  
12,2,1736.503125  
12,2,2857.383721  
12,2,1543.250000  
12,2,2102.656250  
12,2,7455.276316  
12,2,8493.772059  
12,2,2230.843750  
12,2,6637.086538  
12,2,2175.500000  
12,2,2186.602941  
12,2,1756.386364  
12,2,2517.135638  
12,2,1943.517442

12,2,3325.588235  
12,2,1845.526210  
12,2,10931.462963  
12,2,2185.072917  
12,2,1822.939394  
12,2,1818.359756  
12,2,1953.904255  
12,2,1949.719512  
12,2,2798.125000  
12,2,2981.119186  
12,2,1632.424479  
12,2,3561.105263  
12,2,1521.694444  
12,2,1959.114583  
12,2,4030.176829  
12,2,3498.478261  
12,2,5175.031250  
12,2,5439.271277  
12,2,6653.054348  
12,2,3315.738636  
12,2,5051.798780  
12,2,4578.607955  
12,2,3484.503049  
12,2,5102.644886  
12,2,3403.446809  
12,2,1895.162791  
12,2,1871.875000  
12,2,2576.867925  
12,2,2059.710937  
12,2,4341.247449  
12,2,3436.158333  
12,2,3352.679348  
12,2,1527.320122  
12,2,4081.903061  
12,2,2111.375000  
12,2,4997.568452  
12,2,4816.038265  
12,2,23955.159091  
12,2,1812.750000  
12,2,1595.243750  
12,2,2881.605882  
12,2,4419.085938  
12,2,3889.159091  
12,2,1683.730769  
12,2,2303.189427  
12,2,2666.673469  
12,2,1967.427632  
12,2,5618.752315  
12,2,4820.241477  
12,2,2444.558824  
12,2,3217.433511  
12,2,7192.384868  
12,2,2243.038043  
12,2,9150.437500  
12,2,6885.525735  
12,2,2594.593023  
12,2,2025.581731  
12,2,2474.834559  
12,2,1843.381250  
12,2,1594.164062  
12,2,1623.025641  
12,2,3251.129630  
12,2,1733.837264  
12,2,45691.930804  
12,2,1978.450000  
12,2,10787.500000

12,2,2077.887500  
12,2,2236.756757  
12,2,1538.792500  
12,2,2061.162791  
12,2,1618.821429  
12,2,2777.046053  
12,2,4193.332386  
12,2,3405.255319  
12,2,2139.094697  
12,2,1537.250000  
12,2,1530.666667  
12,2,3615.727778  
12,2,6386.527778  
12,2,4747.941667  
12,2,6435.663043  
12,2,2665.581081  
12,2,3592.954545  
12,2,4757.578804  
12,2,2530.128378  
12,2,2592.788889  
12,2,4740.027439  
12,2,2479.625000  
12,2,16487.847973  
12,2,4425.210000  
12,2,11071.888158  
12,2,3217.122549  
12,2,1717.231771  
12,2,1571.642045  
12,2,3144.150000  
12,2,5477.836538  
12,2,1802.857143  
12,2,2199.033088  
12,2,1645.677632  
12,2,4733.548295  
12,2,6491.209016  
12,2,10248.103261  
12,2,3055.024457  
12,2,2284.131579  
12,2,1952.950000  
12,2,2524.440104  
12,2,4410.521739  
12,2,4039.233974  
12,2,1696.887755  
12,2,7693.109756  
12,2,2514.048951  
12,2,3538.902778  
12,2,1616.404523  
12,2,4052.815789  
12,2,1761.703488  
12,2,1536.800000  
12,2,1931.727041  
12,2,5868.953488  
12,2,2412.092500  
12,2,3885.306122  
12,2,1804.161932  
12,2,2102.970745  
12,2,1756.940217  
12,2,3559.920000  
12,2,1753.402778  
12,2,2883.801282  
12,2,5212.101974  
12,2,11659.454861  
12,2,4843.671875  
12,2,20641.913889  
12,2,2436.127660  
12,2,2042.062500

12,2,1731.911111  
12,2,2007.631579  
12,2,2996.671569  
12,2,6870.500000  
12,2,16020.863839  
12,2,2567.388889  
12,2,2056.093750  
12,2,3699.290698  
12,2,3198.903846  
12,2,8284.276786  
12,2,3441.189815  
12,2,3666.422222  
12,2,1978.872396  
12,2,1812.927083  
12,2,2264.184896  
12,2,2512.226562  
12,2,5205.025000  
12,2,4469.210106  
12,2,6843.600000  
12,2,19325.075980  
12,2,2070.043478  
12,2,7381.545213  
12,2,5710.607143  
12,2,2151.512019  
12,2,5412.566860  
12,2,3042.362805  
12,2,3003.230769  
12,2,1835.857143  
12,2,2288.937500  
12,2,1954.983108  
12,2,5991.072368  
12,2,2990.930851  
12,2,2441.628049  
12,2,3170.608696  
12,2,2961.000000  
12,2,5918.155488  
12,2,5456.437500  
12,2,1681.521739  
12,2,2691.945312  
12,2,9575.866379  
12,2,2754.619048  
12,2,1850.069149  
12,2,3957.272727  
12,2,2018.405405  
12,2,1548.250000  
12,2,4650.274096  
12,2,2431.250000  
12,2,2566.734375  
12,2,2514.200000  
12,2,4302.540816  
12,2,2433.414062  
12,2,2409.879808  
12,2,4686.533333  
12,2,1751.153061  
12,2,2953.025000  
12,2,2402.840000  
12,2,3042.423077  
12,2,9667.068182  
12,2,8296.750000  
12,2,5915.993243  
12,2,6633.735849  
12,2,4911.706522  
12,2,1725.240000  
12,2,2339.511364  
12,2,2145.844444  
12,2,7996.500000

12,2,11810.250000  
12,2,2093.776316  
12,2,4938.919598  
12,2,5561.735577  
12,2,2106.737500  
12,2,2619.239362  
12,2,5341.134146  
12,2,5434.214844  
12,2,1564.464286  
12,2,3102.618421  
12,2,4525.430921  
12,2,3311.764706  
12,2,1901.232500  
12,2,3645.630682  
12,2,2582.652439  
12,2,2007.979508  
12,2,2758.000000  
12,2,1684.260204  
12,2,2813.836364  
12,2,1823.419872  
12,2,3306.039216  
12,2,1720.954545  
12,2,2379.494186  
12,2,7023.114583  
12,2,1865.736486  
12,2,1551.941176  
12,2,2045.890625  
12,2,1536.422872  
12,2,4795.020468  
12,2,3376.009479  
12,2,2872.750000  
12,2,2388.066667  
12,2,1575.687500  
12,2,1599.342391  
12,2,2675.287500  
12,2,26580.426396  
12,2,1832.539474  
12,2,5059.056122  
12,2,2915.083333  
12,2,4821.328431  
12,2,33421.866279  
12,2,13303.589286  
12,2,1687.375000  
12,2,1903.750000  
12,2,1759.259375  
12,2,3375.666667  
12,2,4461.127358  
12,2,2339.758333  
12,2,2511.931319  
12,2,47205.642045  
12,2,2088.351351  
12,2,3384.648649  
12,2,4303.162500  
12,2,3755.250000  
12,2,2159.741071  
12,2,1840.484694  
12,2,3174.592105  
12,2,20326.466667  
12,2,6016.964286  
12,2,2740.955882  
12,2,1892.211538  
12,2,1748.638889  
12,2,2227.322500  
12,2,4665.653409  
12,2,4160.966667  
12,2,3759.965714

12,2,5008.254902  
12,2,1950.852273  
12,2,2729.182927  
12,2,1815.188679  
12,2,7448.759494  
12,2,1590.585106  
12,2,3831.787234  
12,2,3283.311224  
12,2,13565.435096  
12,2,3594.653846  
12,2,1862.422222  
12,2,2392.588235  
12,2,1583.125000  
12,2,6905.062500  
12,2,1603.115385  
12,2,1614.432432  
12,2,2497.690789  
12,2,6982.906977  
12,2,2055.261628  
12,2,4442.000000  
12,2,7719.470588  
12,2,12002.584375  
12,2,5521.169811  
12,2,4561.690909  
12,2,1505.106132  
12,2,4931.454545  
12,2,3214.223404  
12,2,3518.958333  
12,2,2253.000000  
12,2,2901.687500  
12,2,3186.526316  
12,2,2942.250000  
12,2,3372.400000  
12,2,3058.433962  
12,2,10700.209302  
12,2,3259.187500  
12,2,1832.702703  
12,2,16693.836735  
12,2,1668.335714  
12,2,13268.349537  
12,2,3129.570000  
12,2,4700.135870  
12,2,2501.361702  
12,2,1788.755319  
12,2,4436.081019  
12,2,11471.840909  
12,2,2368.200000  
12,2,11717.318182  
12,2,5791.151316  
12,2,1888.083333  
12,2,3698.670918  
12,2,2081.440000  
12,2,5576.380368  
12,2,1633.534091  
12,2,3986.979651  
12,2,1537.713415  
12,2,1659.000000  
12,2,5582.638889  
12,2,1694.678922  
12,2,7794.315000  
12,2,11760.294271  
12,2,1726.860465  
12,2,4943.294118  
12,2,1635.285714  
12,2,4194.631579  
12,2,3301.720930

12,2,2838.298469  
12,2,6103.904545  
12,2,1658.727273  
12,2,18251.884615  
12,2,6292.768293  
12,2,2920.891667  
12,2,2801.656250  
12,2,2728.155556  
12,2,1630.432432  
12,2,3359.695312  
12,2,1729.187500  
12,2,1815.800676  
12,2,7962.139205  
12,2,2022.000000  
12,2,6151.880000  
12,2,3837.625000  
12,2,1869.289062  
12,2,2151.562500  
12,2,1506.665698  
12,2,2561.639151  
12,2,4171.312500  
12,2,2158.027027  
12,2,2295.787500  
12,2,5867.536585  
12,2,5947.950000  
12,2,3445.696429  
12,2,3142.241379  
12,2,2004.640244  
12,2,2843.337500  
12,2,1945.484756  
12,2,1629.594595  
12,2,6808.317935  
12,2,2110.270833  
12,2,9767.425532  
12,2,2811.565217  
12,2,4127.774510  
12,2,1659.689904  
12,2,8111.419271  
12,2,3514.000000  
12,2,2267.535714  
12,2,5120.944767  
12,2,2386.774390  
12,2,3552.022059  
12,2,3476.250000  
12,2,2869.250000  
12,2,8158.687500  
12,2,21086.178082  
12,2,3898.027322  
12,2,5442.846939  
12,2,8337.183962  
12,2,4559.304878  
12,2,6262.718085  
12,2,2196.644737  
12,2,2513.619444  
12,2,1787.382022  
12,2,6256.480000  
12,2,2644.740741  
12,2,1514.979167  
12,2,2712.869565  
12,2,6208.900000  
12,2,2273.757353  
12,2,2065.729167  
12,2,3699.658537  
12,2,2065.750000  
12,2,5972.617647  
12,2,3127.788043

12,2,1622.283784  
12,2,3005.442708  
12,2,9359.137500  
12,2,3750.625000  
12,2,2250.115854  
12,2,2737.273585  
12,2,2775.109756  
12,2,2973.182432  
12,2,3380.486364  
12,2,3762.565217  
12,2,3489.500000  
12,2,10007.097561  
12,2,3978.836735  
12,2,1625.000000  
12,2,1655.937500  
12,2,3103.833333  
12,2,2459.218750  
12,2,1581.103659  
12,2,8607.000000  
12,2,3764.571429  
12,2,2109.692308  
12,2,2651.283654  
12,2,1915.110577  
12,2,2206.346154  
12,2,27557.568182  
12,2,2414.000000  
12,2,3021.281250  
12,2,1697.976064  
12,2,2034.725000  
12,2,4322.750000  
12,2,2670.822917  
12,2,2116.571429  
12,2,1972.859756  
12,2,1610.851562  
12,2,1512.951220  
12,2,12573.657895  
12,2,1592.756579  
12,2,1597.945175  
12,2,1933.193069  
12,2,1537.131944  
12,2,4127.056604  
12,2,2015.974359  
12,2,1660.224599  
12,2,2916.568182  
12,2,3382.986111  
12,2,3282.511792  
12,2,4091.010204  
12,2,1851.500000  
12,2,3077.329268  
12,2,5521.220833  
12,2,2826.579545  
12,2,19305.090517  
12,2,2918.018750  
12,2,12041.000000  
12,2,1969.137255  
12,2,8226.525000  
12,2,2605.830882  
12,2,3598.000000  
12,2,6818.607143  
12,2,3783.118421  
12,2,2086.539062  
12,2,3528.750000  
12,2,4505.300000  
12,2,5531.375000  
12,2,7675.817568  
12,2,16759.678879

12,2,3629.631944  
12,2,2906.747500  
12,2,5905.101093  
12,2,4511.981481  
12,2,3136.420455  
12,2,3997.000000  
12,2,5063.850610  
12,2,4285.042553  
12,2,2274.335366  
12,2,2978.477778  
12,2,9080.670455  
12,2,2817.853261  
12,2,2375.154412  
12,2,4053.966837  
12,2,2211.521552  
12,2,1668.940789  
12,2,2461.982143  
12,2,1725.591346  
12,2,4310.968085  
12,2,1778.572500  
12,2,8681.168539  
12,2,1790.000000  
12,2,4247.493243  
12,2,2141.177083  
12,2,10798.072848  
12,2,2411.016760  
12,2,2334.051282  
12,2,2020.035714  
12,2,1747.300000  
12,2,4801.425532  
12,2,6442.953488  
12,2,8708.323864  
12,2,1548.405000  
12,2,2103.250000  
12,2,4898.496855  
12,2,6035.959459  
12,2,5846.418750  
12,2,1554.608696  
12,2,4000.880435  
12,2,4059.884615  
12,2,9242.752907  
12,2,1656.701531  
12,2,5421.744681  
12,2,4249.591346  
12,2,3942.000000  
12,2,1785.573529  
12,2,1801.903061  
12,2,2049.771739  
12,2,1813.598837  
12,2,9973.490566  
12,2,5489.127907  
12,2,3678.250000  
12,2,3936.427083  
12,2,3842.988636  
12,2,1706.602041  
12,2,3249.454545  
12,2,3308.619318  
12,2,1897.475000  
12,2,5042.415865  
12,2,1889.508152  
12,2,1612.456250  
12,2,4883.444444  
12,2,3942.875000  
12,2,3770.974138  
12,2,1612.214286  
12,2,13889.758721

12,2,3131.713542  
12,2,2228.143617  
12,2,5697.096939  
12,2,1504.945513  
12,2,5209.160714  
12,2,3605.739362  
12,2,1899.384259  
12,2,5942.701389  
12,2,2829.851852  
12,2,2280.511364  
12,2,3692.973958  
12,2,1775.437500  
12,2,2628.323353  
12,2,4121.153061  
12,2,4753.150862  
12,2,2458.817610  
12,2,12355.955357  
12,2,2636.586310  
12,2,3322.416667  
12,2,33524.958333  
12,2,3121.090909  
12,2,3820.500000  
12,2,2250.475446  
12,2,4306.820000  
12,2,2589.964286  
12,2,1883.489130  
12,2,1668.270370  
12,2,5114.272727  
12,2,4532.134434  
12,2,3140.847222  
12,2,5839.803571  
12,2,5908.440909  
12,2,11688.799528  
12,2,5500.600000  
12,2,19421.909091  
12,2,3351.489583  
12,2,10531.648256  
12,2,2545.539773  
12,2,2306.657258  
12,2,4584.288265  
12,2,2563.627907  
12,2,4813.983108  
12,2,2841.756579  
12,2,4641.738372  
12,2,2321.375000  
12,2,2839.027778  
12,2,1499.052941  
12,2,2471.500000  
12,2,3174.956731  
12,2,7642.863636  
12,2,4792.775510  
12,2,1696.236842  
12,2,2510.560976  
12,2,3275.104545  
12,2,2322.858491  
12,2,4112.652439  
12,2,1631.500000  
12,2,1699.608696  
12,2,2014.293269  
12,2,3720.429448  
12,2,1923.986842  
12,2,7264.413043  
12,2,2289.610714  
12,2,2062.078947  
12,2,2796.840909  
12,2,3054.179487

12,2,4022.564815  
12,2,2342.914894  
12,2,1536.352941  
12,2,9075.450000  
12,2,4861.931250  
12,2,5821.220238  
12,2,1565.703488  
12,2,4658.610465  
12,2,12462.204082  
12,2,2066.244792  
12,2,2441.583333  
12,2,3665.551136  
12,2,1930.300000  
12,2,11046.234375  
12,2,1593.334184  
12,2,2734.664773  
12,2,7452.910326  
12,2,3761.750000  
12,2,3734.041667  
12,2,1757.784091  
12,2,5889.666667  
12,2,2720.227848  
12,2,2280.093023  
12,2,4539.448529  
12,2,2414.585938  
12,2,2933.790761  
12,2,3330.809045  
12,2,2204.857143  
12,2,1521.493243  
12,2,6542.608696  
12,2,4780.750000  
12,2,4480.479592  
12,2,4825.507979  
12,2,5839.170732  
12,2,2072.454082  
12,2,6625.121795  
12,2,2416.133333  
12,2,4020.730114  
12,2,5897.125000  
12,2,5429.037037  
12,2,3683.350000  
12,2,1764.750000  
12,2,3837.037500  
12,2,1525.726562  
12,2,10579.708333  
12,2,2213.576923  
12,2,5518.500000  
12,2,8395.831395  
12,2,5879.925481  
12,2,1796.902439  
12,2,3286.618750  
12,2,3530.724432  
12,2,4355.136364  
12,2,3028.352041  
12,2,1990.129032  
12,2,2903.634615  
12,2,2813.130208  
12,2,3899.044271  
12,2,5103.349359  
12,2,2375.151316  
12,2,1869.773585  
12,2,5429.454545  
12,2,4960.143216  
12,2,5337.714286  
12,2,2551.588235  
12,2,2695.630682

12,2,4427.512500  
12,2,2737.593750  
12,2,2704.307432  
12,2,4462.177632  
12,2,3075.558511  
12,2,1704.030000  
12,2,2110.019231  
12,2,9077.448980  
12,2,1538.702128  
12,2,1987.758152  
12,2,16605.353659  
12,2,2385.480000  
12,2,3134.744444  
12,2,5943.000000  
12,2,2880.071429  
12,2,2697.755682  
12,2,1611.255102  
12,2,3323.666667  
12,2,2671.479167  
12,2,7923.214286  
12,2,2802.427083  
12,2,5435.258929  
12,2,3025.694149  
12,2,9914.125000  
12,2,2104.125000  
12,2,2183.246622  
12,2,5438.625000  
12,2,2322.562500  
12,2,1702.789286  
12,2,1550.722826  
12,2,2786.540761  
12,2,3703.488372  
12,2,4023.206395  
12,2,5307.081395  
12,2,1886.200000  
12,2,2437.511628  
12,2,8213.380556  
12,2,3543.061224  
12,2,1621.076923  
12,2,2144.289773  
12,2,1723.564189  
12,2,3073.344340  
12,2,4323.769022  
12,2,1634.881579  
12,2,1647.500000  
12,2,2926.015625  
12,2,5641.078431  
12,2,1554.108108  
12,2,12766.090909  
12,2,2068.857143  
12,2,4646.900000  
12,2,2196.855263  
12,2,4225.970238  
12,2,2646.132653  
12,2,5585.833333  
12,2,5804.711538  
12,2,3014.639423  
12,2,2575.296053  
12,2,1603.291667  
12,2,2325.989583  
12,2,2148.698630  
12,2,2324.326923  
12,2,6659.702381  
12,2,2116.446809  
12,2,1839.390625  
12,2,5787.736979

12,2,1953.611111  
12,2,2115.157500  
12,2,3010.071429  
12,2,1581.100000  
12,2,3283.165000  
12,2,25212.064189  
12,2,2463.994186  
12,2,1626.625000  
12,2,4673.055000  
12,2,1606.721354  
12,2,3637.578947  
12,2,3517.804348  
12,2,3659.403846  
12,2,3715.238636  
12,2,2558.907609  
12,2,3619.435897  
12,2,4733.000000  
12,2,3814.293839  
12,2,49470.051471  
12,2,6705.100000  
12,2,3698.473684  
12,2,3687.000000  
12,2,1745.273256  
12,2,13547.176829  
12,2,4159.437500  
12,2,4052.051471  
12,2,1705.335227  
12,2,1562.948529  
12,2,1907.867925  
12,2,2322.054054  
12,2,1576.823718  
12,2,3556.018405  
12,2,3817.744444  
12,2,22497.537879  
12,2,2133.770270  
12,2,1873.090278  
12,2,6709.406250  
12,2,2139.493902  
12,2,6393.770000  
12,2,1646.232558  
12,2,4184.511111  
12,2,1999.697917  
12,2,1972.279070  
12,2,1727.208333  
12,2,6661.650000  
12,2,2281.398936  
12,2,5057.000000  
12,2,6178.471591  
12,2,1607.646552  
12,2,3370.937500  
12,2,1949.433824  
12,2,6361.709821  
12,2,1906.305556  
12,2,5225.719388  
12,2,4952.063776  
12,2,6195.980000  
12,2,8844.125000  
12,2,2642.934028  
12,2,1523.375000  
12,2,3298.625000  
12,2,1741.500000  
12,2,4725.447115  
12,2,2050.276042  
12,2,12781.845395  
12,2,4290.666667  
12,2,8187.232558

12,2,1814.583333  
12,2,2595.678125  
12,2,5902.875000  
12,2,3074.886076  
12,2,1826.341463  
12,2,6950.171875  
12,2,1667.287037  
12,2,3847.761364  
12,2,1630.138889  
12,2,9084.645833  
12,2,2709.750000  
12,2,3256.011111  
12,2,4826.643145  
12,2,2663.445652  
12,2,1840.312500  
12,2,2755.153846  
12,2,8343.489583  
12,2,2803.911765  
12,2,1669.562500  
12,2,2698.677083  
12,2,6315.632653  
12,2,1973.563953  
12,2,3487.388889  
12,2,3262.590909  
12,2,2138.539894  
12,2,4002.780000  
12,2,6751.622642  
12,2,1772.214286  
12,2,6347.743750  
12,2,1686.500000  
12,2,5286.242647  
12,2,8423.651316  
12,2,2133.125000  
12,2,5205.384615  
12,2,2843.601351  
12,2,2222.171875  
12,2,6019.705189  
12,2,6116.387755  
12,2,2118.255556  
12,2,1944.666667  
12,2,3149.882979  
12,2,10100.159483  
12,2,3360.638889  
12,2,2155.691667  
12,2,1784.421875  
12,2,2300.911111  
12,2,17310.291667  
12,2,5118.529070  
12,2,3081.566667  
12,2,5516.689655  
12,2,3330.093023  
12,2,5081.002976  
12,2,1656.731707  
12,2,9426.160000  
12,2,7328.413462  
12,2,1717.333333  
12,2,2425.515000  
12,2,7506.546875  
12,2,1901.845982  
12,2,4439.000000  
12,2,5039.310897  
12,2,1877.510870  
12,2,4684.223837  
12,2,1914.996875  
12,2,1982.850000  
12,2,1768.488372

12,2,2262.188202  
12,2,1722.535714  
12,2,8602.096774  
12,2,1788.601852  
12,2,1976.125000  
12,2,2379.675000  
12,2,1962.651961  
12,2,3706.000000  
12,2,4500.100000  
12,2,2024.348837  
12,2,3344.039634  
12,2,3634.562500  
12,2,6401.725610  
12,2,2473.893617  
12,2,10059.157895  
12,2,4763.101852  
12,2,3414.687500  
12,2,3129.724432  
12,2,5299.155556  
12,2,4012.275000  
12,2,2216.184211  
12,2,2618.286058  
12,2,4397.464286  
12,2,2214.125000  
12,2,3460.218750  
12,2,3458.179688  
12,2,4794.732143  
12,2,1756.348837  
12,2,1816.571429  
12,2,2851.414474  
12,2,1617.155556  
12,2,1648.842105  
12,2,2815.160714  
12,2,2116.534091  
12,2,5110.896552  
12,2,6045.479167  
12,2,4073.828704  
12,2,3310.789634  
12,2,6272.760417  
12,2,2649.138889  
12,2,5007.609375  
12,2,1850.240625  
12,2,2492.947917  
12,2,2485.023256  
12,2,5833.319444  
12,2,4296.405405  
12,2,3629.163636  
12,2,7243.756944  
12,2,1928.634731  
12,2,4929.375000  
12,2,3002.948370  
12,2,4544.739362  
12,2,3604.488636  
12,2,1624.812500  
12,2,2867.573171  
12,2,3287.035088  
12,2,3139.223529  
12,2,2666.023649  
12,2,1852.520833  
12,2,21069.141667  
12,2,2110.187500  
12,2,1600.650000  
12,2,4729.615854  
12,2,2626.017442  
12,2,3468.938596  
12,2,2003.800000

12,2,3193.833333  
12,2,2354.348837  
12,2,6016.523256  
12,2,2612.067935  
12,2,3246.636364  
12,2,1607.290909  
12,2,2449.079545  
12,2,2260.345930  
12,2,3069.872340  
12,2,2367.520833  
12,2,4533.887255  
12,2,3189.095745  
12,2,5158.500000  
12,2,3853.967391  
12,2,2560.927326  
12,2,19031.129310  
12,2,1603.075000  
12,2,4418.712575  
12,2,1932.851190  
12,2,2385.453125  
12,2,6935.835366  
12,2,4494.645408  
12,2,1965.412234  
12,2,5025.341667  
12,2,23420.071429  
12,2,3543.347727  
12,2,3552.258065  
12,2,4467.928571  
12,2,28111.314286  
12,2,6423.616477  
12,2,1958.250000  
12,2,10385.062500  
12,2,1551.121951  
12,2,13675.723684  
12,2,4471.625000  
12,2,3891.312500  
12,2,3207.042553  
12,2,3447.750000  
12,2,2851.625000  
12,2,2663.415761  
12,2,3663.915789  
12,2,4869.806122  
12,2,2370.734694  
12,2,3415.201220  
12,2,2244.562500  
12,2,3038.831731  
12,2,57098.621134  
12,2,4596.663462  
12,2,4463.351293  
12,2,2198.062500  
12,2,1507.000000  
12,2,1571.414062  
12,2,4956.093750  
12,2,1835.705128  
12,2,64559.795918  
12,2,2610.833333  
12,2,3813.978774  
12,2,4523.953125  
12,2,3525.455128  
12,2,2198.846698  
12,2,8184.555556  
12,2,1642.810811  
12,2,3965.580000  
12,2,1592.335106  
12,2,3631.738095  
12,2,3423.937500

12,2,4999.568966  
12,2,3411.933511  
12,2,4985.968610  
12,2,2721.663934  
12,2,7595.368421  
12,2,2113.052326  
12,2,9849.687500  
12,2,2722.897959  
12,2,1729.928125  
12,2,8547.487500  
12,2,7477.797814  
12,2,2168.053892  
12,2,1589.690789  
12,2,7128.440217  
12,2,2776.151042  
12,2,3581.750000  
12,2,4906.711538  
12,2,1637.686047  
12,2,3002.644737  
12,2,21194.866667  
12,2,7689.781915  
12,2,2425.410256  
12,2,1967.450980  
12,2,2723.245283  
12,2,1787.369186  
12,2,1594.076923  
12,2,1749.428571  
12,2,2484.750000  
12,2,6285.092593  
12,2,1597.559211  
12,2,1720.384146  
12,2,3990.147059  
12,2,12620.235849  
12,2,4902.788793  
12,2,2450.611364  
12,2,1668.424528  
12,2,7768.291667  
12,2,2955.870968  
12,2,2244.155172  
12,2,4067.431937  
12,2,4717.348958  
12,2,3246.721154  
12,2,3159.375000  
12,2,1509.402778  
12,2,2311.804487  
12,2,2863.175926  
12,2,3315.502242  
12,2,2025.076923  
12,2,6441.235656  
12,2,1801.343750  
12,2,2086.200000  
12,2,5154.193182  
12,2,5478.055556  
12,2,9304.769643  
12,2,7984.600000  
12,2,2601.639535  
12,2,1625.270531  
12,2,2562.776730  
12,2,1547.720930  
12,2,2493.102941  
12,2,3102.542500  
12,2,1604.900000  
12,2,1505.065000  
12,2,3967.529070  
12,2,1811.964115  
12,2,3334.787234

12,2,4706.370283  
12,2,2553.070312  
12,2,4710.954545  
12,2,2178.534884  
12,2,3783.510870  
12,2,3871.235000  
12,2,2136.867925  
12,2,2119.595455  
12,2,2421.200000  
12,2,2394.319079  
12,2,4122.238095  
12,2,5408.309211  
12,2,4273.130814  
12,2,1521.412500  
12,2,2119.782443  
12,2,1665.794872  
12,2,2151.650000  
12,2,4291.647059  
12,2,8863.332461  
12,2,5461.268473  
12,2,4246.685714  
12,2,2240.481707  
12,2,21837.250000  
12,2,1510.312500  
12,2,6925.300000  
12,2,2239.886628  
12,2,4060.820312  
12,2,1873.592391  
12,2,2104.488372  
12,2,4918.413265  
12,2,3670.896341  
12,2,4154.478723  
12,2,2149.220109  
12,2,13417.586207  
12,2,5787.063636  
12,2,1760.864865  
12,2,5427.428571  
12,2,8938.034091  
12,2,6225.549419  
12,2,1984.979167  
12,2,3160.857143  
12,2,7751.874251  
12,2,4005.385417  
12,2,2646.114130  
12,2,6953.026042  
12,2,1882.084135  
12,2,2105.763587  
12,2,8784.785714  
12,2,2081.243421  
12,2,3693.156250  
12,2,2148.951087  
12,2,2524.739362  
12,2,13894.885204  
12,2,2720.908654  
12,2,3942.032609  
12,2,7671.611413  
12,2,2223.285714  
12,2,2337.297297  
12,2,2647.845109  
12,2,2830.159091  
12,2,3834.403125  
12,2,4179.487981  
12,2,1623.214286  
12,2,2308.826389  
12,2,3454.361111  
12,2,2340.384615

12,2,2065.418605  
12,2,1659.517857  
12,2,1773.432143  
12,2,3837.416667  
12,2,4078.170732  
12,2,2005.930556  
12,2,4414.986111  
12,2,1993.549479  
12,2,2454.025641  
12,2,7226.953975  
12,2,4024.950739  
12,2,1698.500000  
12,2,4736.250000  
12,2,1650.484694  
12,2,1784.729730  
12,2,2024.977778  
12,2,9154.292453  
12,2,3046.095395  
12,2,1661.200000  
12,2,2181.375000  
12,2,5346.406250  
12,2,1814.985119  
12,2,38016.451613  
12,2,5126.584302  
12,2,1736.545455  
12,2,2650.267857  
12,2,2025.150735  
12,2,2101.640000  
12,2,2847.470588  
12,2,3744.705882  
12,2,1528.020833  
12,2,3393.802885  
12,2,4513.349265  
12,2,2082.364583  
12,2,4498.562500  
12,2,1992.187500  
12,2,1818.792398  
12,2,3799.843750  
12,2,1654.638889  
12,2,2576.181034  
12,2,1877.545455  
12,2,1518.421053  
12,2,8383.583333  
12,2,1691.690000  
12,2,22377.386574  
12,2,4533.949640  
12,2,3180.281915  
12,2,2378.456522  
12,2,2180.204545  
12,2,3016.900000  
12,2,1775.932927  
12,2,1894.002841  
12,2,2208.500000  
12,2,54660.430851  
12,2,4571.687500  
12,2,2355.333333  
12,2,1741.197368  
12,2,12287.201878  
12,2,6190.052910  
12,2,1841.450000  
12,2,10444.106855  
12,2,2560.283537  
12,2,14509.032407  
12,2,1953.027778  
12,2,11494.576923  
12,2,7943.914063

12,2,1793.638889  
12,2,6919.700000  
12,2,2402.571429  
12,2,6241.209302  
12,2,6966.586538  
12,2,1754.988372  
12,2,1881.435000  
12,2,3735.233333  
12,2,2158.058594  
12,2,5695.264423  
12,2,3768.348684  
12,2,4366.887255  
12,2,1861.890909  
12,2,3463.062500  
12,2,3781.500000  
12,2,7219.796569  
12,2,2388.606383  
12,2,2897.303125  
12,2,2277.930000  
12,2,1852.695000  
12,2,2125.727273  
12,2,3409.329268  
12,2,3028.787500  
12,2,1971.255814  
12,2,6883.641393  
12,2,2760.457447  
12,2,3578.164474  
12,2,3542.159574  
12,2,3209.478723  
12,2,7690.267442  
12,2,4148.569149  
12,2,2355.486842  
12,2,8706.086957  
12,2,1749.687500  
12,2,7268.216463  
12,2,4038.738095  
12,2,9298.545455  
12,2,2471.900943  
12,2,2220.110119  
12,2,4572.341981  
12,2,2455.812500  
12,2,1865.890625  
12,2,3744.275510  
12,2,2694.712500  
12,2,13365.579545  
12,2,1784.182927  
12,2,11611.872642  
12,2,2896.560976  
12,2,7688.002273  
12,2,12760.365546  
12,2,6642.315217  
12,2,3948.942708  
12,2,1547.250000  
12,2,4822.971698  
12,2,3657.750000  
12,2,2129.231771  
12,2,2508.720930  
12,2,3544.823529  
12,2,2079.350000  
12,2,2717.969388  
12,2,1771.791667  
12,2,3355.774390  
12,2,18241.256579  
12,2,4766.691327  
12,2,8582.750000  
12,2,2033.682432

12,2,1738.056650  
12,2,5219.919643  
12,2,1597.260417  
12,2,1780.089888  
12,2,2626.942935  
12,2,2332.869048  
12,2,3882.639151  
12,2,1572.395408  
12,2,1598.343750  
12,2,3515.023437  
12,2,1616.250000  
12,2,11720.533898  
12,2,5675.852273  
12,2,4569.250000  
12,2,5282.598214  
12,2,8490.422581  
12,2,1874.715278  
12,2,2177.743421  
12,2,1539.465116  
12,2,4329.099490  
12,2,4032.859375  
12,2,2208.313953  
12,2,2917.297872  
12,2,2837.676136  
12,2,2264.750000  
12,2,2024.982143  
12,2,2658.172222  
12,2,1749.232143  
12,2,1744.872340  
12,2,3268.915698  
12,2,2818.750000  
12,2,3113.000000  
12,2,1619.011628  
12,2,2009.212500  
12,2,6338.169811  
12,2,1810.722826  
12,2,23470.292969  
12,2,4465.276316  
12,2,11562.848404  
12,2,2676.944444  
12,2,1935.260870  
12,2,2264.130814  
12,2,2365.957746  
12,2,3338.500000  
12,2,2204.222826  
12,2,1693.363095  
12,2,3477.851064  
12,2,2220.831522  
12,2,3467.656250  
12,2,4952.000000  
12,2,1692.762500  
12,2,2382.613636  
12,2,15332.334459  
12,2,3128.948980  
12,2,4414.863636  
12,2,2563.250000  
12,2,8125.000000  
12,2,3520.148649  
12,2,4058.173469  
12,2,11261.673077  
12,2,9489.785714  
12,2,2844.605978  
12,2,2159.227273  
12,2,1783.213542  
12,2,2232.267045  
12,2,10715.863636

12,2,2164.912500  
12,2,1898.131579  
12,2,10290.560185  
12,2,4152.279070  
12,2,2053.906977  
12,2,5399.659091  
12,2,2056.756250  
12,2,12859.959091  
12,2,3398.513587  
12,2,3161.055233  
12,2,4256.488889  
12,2,5936.142857  
12,2,3397.455556  
12,2,5194.128472  
12,2,6268.747500  
12,2,9814.460000  
12,2,2394.250000  
12,2,5495.621528  
12,2,2055.769231  
12,2,3046.932203  
12,2,3555.541667  
12,2,3372.528409  
12,2,1521.785714  
12,2,7084.187500  
12,2,2594.167553  
12,2,2570.018293  
12,2,5100.336538  
12,2,2657.533654  
12,2,2769.950000  
12,2,3857.923077  
12,2,2674.288889  
12,2,11709.915094  
12,2,4182.026786  
12,2,1968.384615  
12,2,5720.025641  
12,2,1615.258621  
12,2,8094.542683  
12,2,1834.164634  
12,2,2852.489865  
12,2,2309.588068  
12,2,1629.047619  
12,2,3224.125000  
12,2,1825.309783  
12,2,2114.911932  
12,2,8236.191489  
12,2,1717.704545  
12,2,1738.040323  
12,2,3505.385417  
12,2,3609.678571  
12,2,9985.646930  
12,2,12889.000000  
12,2,4200.078947  
12,2,1545.628125  
12,2,3494.048913  
12,2,4080.825000  
12,2,4722.854167  
12,2,3654.247449  
12,2,2954.260870  
12,2,4714.307692  
12,2,2473.700000  
12,2,5218.734694  
12,2,3731.495098  
12,2,2425.346154  
12,2,2614.864516  
12,2,6692.275000  
12,2,9014.146341

12,2,2804.088889  
12,2,4038.816176  
12,2,3435.537500  
12,2,4158.000000  
12,2,1500.173913  
12,2,2752.023256  
12,2,3441.849057  
12,2,6731.696875  
12,2,5675.190972  
12,2,2536.930000  
12,2,3112.329082  
12,2,4581.348837  
12,2,2839.598039  
12,2,2290.830729  
12,2,3728.555556  
12,2,1605.642857  
12,2,55466.953431  
12,2,1665.022727  
12,2,1560.648649  
12,2,1866.364130  
12,2,1632.369444  
12,2,6355.562500  
12,2,9600.257322  
12,2,2544.184783  
12,2,5125.562500  
12,2,2747.936170  
12,2,1645.916667  
12,2,1738.048611  
12,2,4601.016447  
12,2,1769.103448  
12,2,2429.909574  
12,2,1893.522500  
12,2,1710.006098  
12,2,2953.414062  
12,2,3323.062500  
12,2,2287.928571  
12,2,1600.179878  
12,2,3042.398649  
12,2,9979.611111  
12,2,6693.210000  
12,2,1859.010135  
12,2,9491.433014  
12,2,3572.515152  
12,2,2340.037037  
12,2,2702.200000  
12,2,3933.644737  
12,2,2051.980769  
12,2,5551.971154  
12,2,4892.075000  
12,2,4406.500000  
12,2,1633.023810  
12,2,2007.269231  
12,2,3086.571023  
12,2,1760.677083  
12,2,9887.804020  
12,2,2527.720109  
12,2,2261.625000  
12,2,1588.333333  
12,2,4672.750000  
12,2,2226.923913  
12,2,8614.397959  
12,2,4886.265625  
12,2,2752.252451  
12,2,8690.514706  
12,2,1610.936170  
12,2,4800.503289

12,2,3195.384146  
12,2,15580.182927  
12,2,5081.078804  
12,2,3271.083333  
12,2,1636.080000  
12,2,2332.559091  
12,2,12368.187500  
12,2,2510.084302  
12,2,2804.956667  
12,2,3077.451613  
12,2,2182.500000  
12,2,1963.067308  
12,2,1650.300000  
12,2,3793.625000  
12,2,3775.000000  
12,2,2424.586957  
12,2,4999.428571  
12,2,1530.678571  
12,2,1680.449468  
12,2,3921.177500  
12,2,1974.068750  
12,2,2540.306250  
12,2,5793.801724  
12,2,2530.860795  
12,2,4744.972826  
12,2,14738.851563  
12,2,2202.739583  
12,2,2324.064815  
12,2,2360.843750  
12,2,1881.893617  
12,2,2184.307927  
12,2,4409.702586  
12,2,4794.219340  
12,2,3434.970395  
12,2,6777.058962  
12,2,3299.330357  
12,2,2556.650000  
12,2,5419.031250  
12,2,5185.770833  
12,2,3156.617647  
12,2,1806.743902  
12,2,2655.902439  
12,2,2109.369318  
12,2,1761.223404  
12,2,4670.450000  
12,2,2470.734375  
12,2,5294.915254  
12,2,7009.756098  
12,2,9269.322368  
12,2,3378.300000  
12,2,2641.836735  
12,2,2409.795918  
12,2,1774.500000  
12,2,1937.971875  
12,2,1571.014535  
12,2,1848.794118  
12,2,2632.440476  
12,2,4765.666667  
12,2,5676.207447  
12,2,7195.542135  
12,2,1975.250000  
12,2,6850.857759  
12,2,2358.641892  
12,2,2722.792553  
12,2,4809.712042  
12,2,2805.977833

12,2,6394.807292  
12,2,2699.966837  
12,2,1909.541667  
12,2,4469.013158  
12,2,2441.647059  
12,2,7052.845238  
12,2,5230.861486  
12,2,1609.152778  
12,2,1911.642857  
12,2,2301.816038  
12,2,2627.160000  
12,2,3562.375000  
12,2,5965.565217  
12,2,4374.509375  
12,2,3287.125000  
12,2,1514.452830  
12,2,1934.595745  
12,2,1849.357955  
12,2,3794.284884  
12,2,2122.000000  
12,2,4707.599432  
12,2,7257.593750  
12,2,5163.625000  
12,2,1720.000000  
12,2,1788.587097  
12,2,1556.212500  
12,2,1766.076220  
12,2,2577.067308  
12,2,3866.673295  
12,2,2018.005556  
12,2,3507.148936  
12,2,2012.495370  
12,2,3271.502907  
12,2,1526.100610  
12,2,2469.546392  
12,2,2570.862745  
12,2,2146.728723  
12,2,1922.897959  
12,2,2623.274390  
12,2,1675.611364  
12,2,4120.169872  
12,2,1610.788265  
12,2,1725.414634  
12,2,2773.263889  
12,2,4681.014706  
12,2,1525.552632  
12,2,3860.575658  
12,2,2813.583333  
12,2,2529.125000  
12,2,3247.592391  
12,2,9702.641447  
12,2,2156.500000  
12,2,3085.220745  
12,2,5164.866279  
12,2,4504.910714  
12,2,3313.240566  
12,2,13750.346939  
12,2,6130.184783  
12,2,2091.105769  
12,2,2263.135135  
12,2,8341.987448  
12,2,2228.547500  
12,2,2501.206250  
12,2,3057.408163  
12,2,3981.675000  
12,2,1954.382813

12,2,3949.362500  
12,2,3233.768519  
12,2,2238.153846  
12,2,3035.953488  
12,2,2416.250000  
12,2,4072.757653  
12,2,1922.263158  
12,2,2029.583333  
12,2,3318.216463  
12,2,4096.095238  
12,2,2892.023256  
12,2,10553.727273  
12,2,8687.362745  
12,2,4248.440217  
12,2,3275.680556  
12,2,4608.132353  
12,2,2302.141304  
12,2,2302.198171  
12,2,4998.930851  
12,2,3845.000000  
12,2,1725.406250  
12,2,4435.111111  
12,2,2148.724359  
12,2,2835.139535  
12,2,4113.000000  
12,2,1529.373239  
12,2,4888.346939  
12,2,2456.130952  
12,2,2669.496875  
12,2,1842.272727  
12,2,5040.018182  
12,2,1769.132653  
12,2,2115.625000  
12,2,4501.086538  
12,2,2638.828125  
12,2,3400.895833  
12,2,1614.633523  
12,2,2048.080556  
12,2,2630.818182  
12,2,4336.118902  
12,2,1575.169643  
12,2,3119.227041  
12,2,4559.650000  
12,2,3937.535714  
12,2,1511.303191  
12,2,2062.667683  
12,2,2241.964286  
12,2,2344.928571  
12,2,1509.391827  
12,2,2448.703704  
12,2,5089.043011  
12,2,2007.022059  
12,2,2815.372093  
12,2,1527.658537  
12,2,3085.790323  
12,2,2389.029412  
12,2,2271.373984  
12,2,4441.983696  
12,2,2416.000000  
12,2,81011.918605  
12,2,1786.152027  
12,2,7670.025510  
12,2,5322.918919  
12,2,1633.518868  
12,2,3291.325000  
12,2,4112.593750

12,2,2592.122449  
12,2,2236.090426  
12,2,2264.522222  
12,2,1666.311224  
12,2,2388.394737  
12,2,5107.365000  
12,2,4262.081395  
12,2,9962.166667  
12,2,1926.790698  
12,2,2335.733333  
12,2,2832.302326  
12,2,1778.835227  
12,2,10018.304545  
12,2,1808.305000  
12,2,3691.266892  
12,2,2984.877828  
12,2,1654.375000  
12,2,3210.571429  
12,2,3405.468750  
12,2,2929.359375  
12,2,2238.071429  
12,2,2614.757979  
12,2,2486.736842  
12,2,10512.925000  
12,2,3652.882979  
12,2,2227.943396  
12,2,5106.619632  
12,2,3186.511111  
12,2,4836.651163  
12,2,2852.489362  
12,2,6928.684896  
12,2,1516.661585  
12,2,3361.222500  
12,2,12454.265625  
12,2,3466.231771  
12,2,4884.573370  
12,2,2189.836735  
12,2,1978.076531  
12,2,3328.650000  
12,2,4081.432927  
12,2,2161.691489  
12,2,5939.270408  
12,2,1992.613636  
12,2,3386.990625  
12,2,1512.462209  
12,2,3088.056122  
12,2,5878.468750  
12,2,4602.277778  
12,2,3395.051282  
12,2,1744.802083  
12,2,5158.434211  
12,2,9047.197115  
12,2,2371.535714  
12,2,4513.100000  
12,2,14084.625000  
12,2,2279.545732  
12,2,1693.963235  
12,2,1798.394231  
12,2,4922.297872  
12,2,1915.654070  
12,2,2296.960227  
12,2,2312.306548  
12,2,16349.992857  
12,2,3325.365854  
12,2,1988.428571  
12,2,2846.947368

12,2,3555.217391  
12,2,2045.022727  
12,2,3854.671512  
12,2,1602.048295  
12,2,1902.483108  
12,2,3956.426471  
12,2,11344.782500  
12,2,8014.333333  
12,2,2100.770833  
12,2,1739.840909  
12,2,2804.669811  
12,2,5880.852941  
12,2,4479.439103  
12,2,3518.804348  
12,2,5612.281250  
12,2,1578.821429  
12,2,2007.275641  
12,2,4640.769231  
12,2,2635.627841  
12,2,1525.826816  
12,2,6813.990385  
12,2,3905.159722  
12,2,4262.111979  
12,2,3231.658654  
12,2,5680.587500  
12,2,1824.349057  
12,2,2092.339286  
12,2,18941.888889  
12,2,3738.845238  
12,2,18426.560976  
12,2,3516.692073  
12,2,3044.879717  
12,2,6422.281250  
12,2,72187.111111  
12,2,2164.843137  
12,2,2892.753571  
12,2,2072.632353  
12,2,6652.352941  
12,2,1793.833333  
12,2,9331.910000  
12,2,2818.057692  
12,2,1532.320513  
12,2,2436.962209  
12,2,1696.604167  
12,2,3494.783333  
12,2,6218.345000  
12,2,2619.647059  
12,2,1904.750000  
12,2,2642.718750  
12,2,2228.670455  
12,2,3062.537500  
12,2,2248.817500  
12,2,3585.649123  
12,2,2528.036458  
12,2,2148.604167  
12,2,4105.308511  
12,2,3649.118644  
12,2,3336.595506  
12,2,11914.043478  
12,2,1838.756098  
12,2,1633.718750  
12,2,6306.030000  
12,2,2336.579082  
12,2,1950.100962  
12,2,3560.125000  
12,2,2427.905000

12,2,4773.381579  
12,2,6353.924528  
12,2,2375.312500  
12,2,6150.071875  
12,2,2363.945946  
12,2,1890.475000  
12,2,1911.970109  
12,2,4317.026316  
12,2,6920.891393  
12,2,3364.556122  
12,2,2749.792683  
12,2,2377.505102  
12,2,1557.483108  
12,2,3879.369186  
12,2,3871.319444  
12,2,2433.936047  
12,2,4851.512500  
12,2,6868.833333  
12,2,3894.955357  
12,2,3834.296053  
12,2,2120.705882  
12,2,2603.366071  
12,2,2719.993421  
12,2,10382.418367  
12,2,4462.690000  
12,2,6443.817857  
12,2,3514.900000  
12,2,5598.538043  
12,2,3587.571429  
12,2,2764.256250  
12,2,2607.510593  
12,2,1531.210526  
12,2,3146.571429  
12,2,2694.200000  
12,2,2975.329787  
12,2,4672.678571  
12,2,4438.500000  
12,2,1613.925532  
12,2,2673.120690  
12,2,1500.317073  
12,2,3069.225166  
12,2,6003.723404  
12,2,3296.692500  
12,2,19234.261364  
12,2,2351.558824  
12,2,2458.558140  
12,2,3063.506410  
12,2,9355.000000  
12,2,2668.472561  
12,2,1536.101974  
12,2,3962.187500  
12,2,1875.826087  
12,2,8169.785714  
12,2,5043.450000  
12,2,5701.110795  
12,2,3164.239796  
12,2,3308.678125  
12,2,5256.053191  
12,2,4666.804878  
12,2,2680.750000  
12,2,1785.665625  
12,2,2029.081081  
12,2,5469.864583  
12,2,10986.073171  
12,2,7776.557692  
12,2,2186.750000

12,2,1644.877907  
12,2,9010.773585  
12,2,30220.807143  
12,2,1537.258152  
12,2,5090.901163  
12,2,1966.630102  
12,2,2412.881579  
12,2,4624.355556  
12,2,1860.757353  
12,2,3687.135417  
12,2,5284.687500  
12,2,5487.613372  
12,2,3801.967949  
12,2,1617.500000  
12,2,5440.215426  
12,2,2628.000000  
12,2,10937.976744  
12,2,1948.245000  
12,2,4038.630137  
12,2,1745.172414  
12,2,3336.511905  
12,2,1789.612245  
12,2,1567.562500  
12,2,1504.445946  
12,2,1666.265152  
12,2,4237.525000  
12,2,2570.083333  
12,2,3262.932927  
12,2,2828.665541  
12,2,8287.964623  
12,2,5739.516667  
12,2,1592.523256  
12,2,3137.322115  
12,2,2369.054245  
12,2,1721.627358  
12,2,10765.930851  
12,2,2484.358289  
12,2,6762.090909  
12,2,1886.788043  
12,2,2251.465909  
12,2,2220.346875  
12,2,2355.909091  
12,2,5484.402439  
12,2,1688.533537  
12,2,6713.951923  
12,2,4242.179348  
12,2,8309.566667  
12,2,1618.422222  
12,2,3013.559659  
12,2,1802.804348  
12,2,1712.671875  
12,2,4987.555233  
12,2,1565.317935  
12,2,6109.125000  
12,2,1611.543860  
12,2,2616.480263  
12,2,4037.924171  
12,2,1590.692737  
12,2,1548.804688  
12,2,5676.062500  
12,2,1841.416667  
12,2,4331.050481  
12,2,5976.441406  
12,2,1661.668605  
12,2,6345.732759  
12,2,2252.282609

12,2,2329.145833  
12,2,1557.000000  
12,2,2939.658537  
12,2,6519.276442  
12,2,8073.587209  
12,2,2791.791667  
12,2,2155.000000  
12,2,3799.106707  
12,2,4195.692073  
12,2,2067.402174  
12,2,20968.205882  
12,2,2927.362745  
12,2,5374.611413  
12,2,3946.000000  
12,2,2001.796569  
12,2,2653.804348  
12,2,10647.241071  
12,2,5062.015000  
12,2,3710.415205  
12,2,2912.557143  
12,2,4070.365854  
12,2,1883.098684  
12,2,1862.071429  
12,2,1499.294872  
12,2,2373.684524  
12,2,3325.975610  
12,2,1803.450000  
12,2,8356.636364  
12,2,3902.312500  
12,2,6003.214286  
12,2,2725.255102  
12,2,3071.355556  
12,2,2406.486486  
12,2,9018.183511  
12,2,2658.190341  
12,2,1928.028846  
12,2,2199.000000  
12,2,1894.659884  
12,2,2574.713415  
12,2,1620.255208  
12,2,4999.239130  
12,2,2836.296053  
12,2,5149.018750  
12,2,2927.155405  
12,2,2613.000000  
12,2,2411.527500  
12,2,9685.255319  
12,2,2599.136364  
12,2,2774.857143  
12,2,4289.562500  
12,2,5056.428977  
12,2,7103.071429  
12,2,4002.356771  
12,2,4054.848039  
12,2,2391.756944  
12,2,2610.383117  
12,2,2451.217391  
12,2,1662.085714  
12,2,2373.400000  
12,2,1611.432432  
12,2,2197.458333  
12,2,2065.174342  
12,2,2151.294872  
12,2,6147.737500  
12,2,2091.069672  
12,2,2423.108108

12,2,3061.627500  
12,2,2017.883721  
12,2,2077.949468  
12,2,2024.585000  
12,2,3204.062500  
12,2,6279.602041  
12,2,3681.130435  
12,2,2826.192308  
12,2,2339.282609  
12,2,1830.787037  
12,2,8983.439024  
12,2,3274.958333  
12,2,4438.444134  
12,2,6247.425481  
12,2,4555.538462  
12,2,2877.703947  
12,2,7405.437500  
12,2,1658.511364  
12,2,3118.513514  
12,2,5560.225962  
12,2,2954.543750  
12,2,2710.595238  
12,2,3996.979592  
12,2,2875.468137  
12,2,3815.408416  
12,2,1674.682927  
12,2,2550.875000  
12,2,7191.644231  
12,2,3058.552632  
12,2,3757.270408  
12,2,1784.069149  
12,2,2539.250000  
12,2,1825.125000  
12,2,2745.089286  
12,2,3019.172872  
12,2,2156.948571  
12,2,1817.300000  
12,2,3248.369681  
12,2,1516.093750  
12,2,2064.750000  
12,2,2962.255000  
12,2,2715.393750  
12,2,1845.500000  
12,2,2342.347826  
12,2,4574.333333  
12,2,6056.166667  
12,2,14800.772059  
12,2,4913.307692  
12,2,1697.297619  
12,2,4267.865741  
12,2,2361.518293  
12,2,2790.776316  
12,2,2402.687500  
12,2,17696.951705  
12,2,2058.081081  
12,2,3966.979592  
12,2,1884.475610  
12,2,15542.225000  
12,2,2250.720109  
12,2,3540.511364  
12,2,6294.416667  
12,2,1943.351351  
12,2,1760.067568  
12,2,3358.902174  
12,2,16138.490385  
12,2,2099.013158

12,2,3836.633333  
12,2,2253.315789  
12,2,3540.330357  
12,2,2030.875000  
12,2,1669.538462  
12,2,3197.027778  
12,2,3132.968750  
12,2,3031.808824  
12,2,1814.255814  
12,2,2304.707317  
12,2,3281.881250  
12,2,2444.549342  
12,2,4301.640000  
12,2,7120.500000  
12,2,3745.601064  
12,2,1512.308824  
12,2,15064.000000  
12,2,5202.555556  
12,2,1591.968750  
12,2,8724.534884  
12,2,4798.800633  
12,2,4149.533333  
12,2,2140.500000  
12,2,5004.343750  
12,2,7044.228261  
12,2,2307.518293  
12,2,3520.033816  
12,2,20571.802817  
12,2,5747.372340  
12,2,4411.062500  
12,2,1799.606383  
12,2,2547.369318  
12,2,5383.000000  
12,2,2069.139535  
12,2,1529.152174  
12,2,2771.116848  
12,2,1981.403509  
12,2,6114.290761  
12,2,2979.812500  
12,2,6498.405405  
12,2,2045.079268  
12,2,51582.821429  
12,2,1995.955556  
12,2,6273.322368  
12,2,4287.185096  
12,2,2017.429348  
12,2,3299.167553  
12,2,1906.894737  
12,2,1950.651163  
12,2,1719.666667  
12,2,1838.146277  
12,2,1858.348039  
12,2,2452.833333  
12,2,6421.304688  
12,2,3052.052632  
12,2,4681.678899  
12,2,3325.651786  
12,2,2468.527174  
12,2,6163.876838  
12,2,2366.568182  
12,2,2139.054348  
12,2,3125.518750  
12,2,3621.666667  
12,2,1506.031250  
12,2,2028.388889  
12,2,3832.363636

12,2,3021.750000  
12,2,8852.305556  
12,2,7853.750000  
12,2,2931.560976  
12,2,2898.571023  
12,2,2520.750000  
12,2,1954.682692  
12,2,5082.360465  
12,2,1853.375000  
12,2,5796.891026  
12,2,5952.750000  
12,2,4157.933962  
12,2,2260.127907  
12,2,5907.916667  
12,2,4595.022222  
12,2,1845.866071  
12,2,87980.161765  
12,2,4186.671875  
12,2,2706.755319  
12,2,3437.276596  
12,2,2999.125000  
12,2,6458.184783  
12,2,4544.048913  
12,2,3174.757075  
12,2,2249.296053  
12,2,2241.277778  
12,2,3192.711957  
12,2,3217.478261  
12,2,3302.500000  
12,2,3919.414894  
12,2,2151.440000  
12,2,1573.600000  
12,2,4898.821429  
12,2,3405.187500  
12,2,3970.482143  
12,2,1659.880814  
12,2,2783.390625  
12,2,3833.673516  
12,2,2691.105128  
12,2,3980.122283  
12,2,1637.298780  
12,2,2514.394022  
12,2,5088.765957  
12,2,2685.923913  
12,2,3595.538265  
12,2,7402.517857  
12,2,1963.890306  
12,2,1838.000000  
12,2,4232.566964  
12,2,1902.250000  
12,2,2210.586957  
12,2,1698.322674  
12,2,5098.771341  
12,2,12453.837500  
12,2,3531.519737  
12,2,5881.579545  
12,2,2158.788889  
12,2,3325.718750  
12,2,6366.784375  
12,2,2295.638021  
12,2,2037.482412  
12,2,1556.665829  
12,2,3514.155556  
12,2,1730.533784  
12,2,3567.875000  
12,2,13391.133333

12,2,4285.440217  
12,2,15581.647436  
12,2,2724.637755  
12,2,5883.255814  
12,2,23596.712042  
12,2,2518.285714  
12,2,1766.150000  
12,2,2757.900000  
12,2,7125.310000  
12,2,2444.070755  
12,2,3680.840909  
12,2,3435.810000  
12,2,1553.019231  
12,2,3567.592391  
12,2,11577.271277  
12,2,3425.476440  
12,2,2235.823034  
12,2,3684.095000  
12,2,3824.830357  
12,2,2253.272059  
12,2,2173.116848  
12,2,25151.950617  
12,2,4074.520000  
12,2,1676.112245  
12,2,1850.300595  
12,2,3805.833333  
12,2,26629.170732  
12,2,3806.906250  
12,2,2751.883152  
12,2,2178.547297  
12,2,4408.744681  
12,2,2258.910256  
12,2,3336.966667  
12,2,3581.823529  
12,2,2472.942073  
12,2,1778.042614  
12,2,1631.500000  
12,2,7843.612583  
12,2,4090.105263  
12,2,2415.187500  
12,2,1674.572917  
12,2,16148.516204  
12,2,2639.934211  
12,2,1939.007212  
12,2,2425.000000  
12,2,2392.218750  
12,2,1533.528302  
12,2,10109.216667  
12,2,3341.000000  
12,2,4792.634804  
12,2,7825.372222  
12,2,5097.294643  
12,2,3365.338235  
12,2,2871.632653  
12,2,2021.412791  
12,2,1683.946023  
12,2,1696.880000  
12,2,2881.157895  
12,2,2148.467105  
12,2,2165.500000  
12,2,10157.095238  
12,2,3652.983796  
12,2,6874.962963  
12,2,1715.375000  
12,2,1970.614130  
12,2,4232.103723

12,2,1961.872449  
12,2,4018.349432  
12,2,6700.419271  
12,2,2152.714286  
12,2,6549.505208  
12,2,2767.650000  
12,2,1702.625000  
12,2,14763.587500  
12,2,2174.487500  
12,2,2720.136364  
12,2,1994.473684  
12,2,5733.636364  
12,2,2062.647059  
12,2,3269.343137  
12,2,6116.972826  
12,2,1547.574468  
12,2,1542.869565  
12,2,3966.562500  
12,2,1585.826087  
12,2,2451.802326  
12,2,3539.833333  
12,2,4323.204545  
12,2,7178.638889  
12,2,1936.919811  
12,2,2541.764706  
12,2,1520.540816  
12,2,2437.840278  
12,2,1876.585938  
12,2,13798.500000  
12,2,1702.601974  
12,2,2456.297619  
12,2,2019.480769  
12,2,8870.083333  
12,2,1673.480000  
12,2,2639.475000  
12,2,8214.702703  
12,2,1666.852941  
12,2,2187.916667  
12,2,9114.384434  
12,2,2684.551282  
12,2,2870.662162  
12,2,4756.750000  
12,2,2021.225000  
12,2,2805.532609  
12,2,2794.047619  
12,2,2280.220930  
12,2,2098.939394  
12,2,3055.362500  
12,2,2297.274510  
12,2,3451.662162  
12,2,2086.482143  
12,2,8508.008671  
12,2,4832.489583  
12,2,2197.940217  
12,2,2873.357143  
12,2,4485.121951  
12,2,1747.292553  
12,2,4919.551020  
12,2,3494.370968  
12,2,4847.964286  
12,2,2221.500000  
12,2,2045.312500  
12,2,2869.378049  
12,2,3383.908537  
12,2,2432.707386  
12,2,2808.037500

12,2,2862.381579  
12,2,2597.397727  
12,2,18916.047222  
12,2,2170.281250  
12,2,3037.021739  
12,2,2313.893617  
12,2,3240.220588  
12,2,1568.684524  
12,2,1882.718750  
12,2,3485.798077  
12,2,1548.804348  
12,2,2506.802326  
12,2,14812.037234  
12,2,9831.896341  
12,2,2463.315217  
12,2,2770.000000  
12,2,2928.611111  
12,2,3353.355978  
12,2,2194.250000  
12,2,2920.882812  
12,2,3070.312500  
12,2,1614.240000  
12,2,1514.346154  
12,2,1690.432432  
12,2,3478.715426  
12,2,6749.500000  
12,2,2808.817568  
12,2,1921.012500  
12,2,1715.880319  
12,2,4717.500000  
12,2,2394.143229  
12,2,1841.750000  
12,2,7125.561404  
12,2,4422.650000  
12,2,1831.830688  
12,2,9222.945000  
12,2,2920.729592  
12,2,2179.383721  
12,2,2000.917614  
12,2,7968.687500  
12,2,1775.328125  
12,2,4915.296296  
12,2,1662.703125  
12,2,2747.647059  
12,2,3604.200980  
12,2,6770.750000  
12,2,2729.804878  
12,2,8965.923469  
12,2,2942.378205  
12,2,14969.587629  
12,2,10490.002500  
12,2,5235.384868  
12,2,5193.160714  
12,2,7966.244048  
12,2,2359.697368  
12,2,2574.408163  
12,2,2226.807947  
12,2,1865.950000  
12,2,8729.903061  
12,2,2210.212766  
12,2,1987.625000  
12,2,5063.163265  
12,2,2311.377551  
12,2,5171.665761  
12,2,2224.243421  
12,2,2284.820755

12,2,1661.935897  
12,2,1737.705556  
12,2,2168.931373  
12,2,5071.100962  
12,2,2312.101744  
12,2,8508.385204  
12,2,2689.773810  
12,2,6630.481707  
12,2,2841.470000  
12,2,4777.705882  
12,2,2091.551136  
12,2,1506.589844  
12,2,2538.056548  
12,2,2731.833333  
12,2,1777.122222  
12,2,2164.213816  
12,2,6786.205882  
12,2,8344.377358  
12,2,1959.066176  
12,2,1501.734043  
12,2,1820.408163  
12,2,1643.512755  
12,2,1694.500000  
12,2,2016.895349  
12,2,5877.436364  
12,2,1562.812500  
12,2,2673.638889  
12,2,2207.441038  
12,2,4439.579327  
12,2,4582.330189  
12,2,2448.250000  
12,2,2023.548387  
12,2,4641.952206  
12,2,1713.920000  
12,2,3837.942308  
12,2,10126.977273  
12,2,1678.455000  
12,2,2142.023256  
12,2,1835.000000  
12,2,5429.305389  
12,2,4522.608796  
12,2,11322.221719  
12,2,4447.050000  
12,2,4119.595745  
12,2,3326.736979  
12,2,10052.500000  
12,2,5766.466667  
12,2,2755.548295  
12,2,2102.340278  
12,2,3490.970930  
12,2,6750.555288  
12,2,40294.395270  
12,2,2983.732558  
12,2,17322.915761  
12,2,6449.080128  
12,2,2307.511628  
12,2,1842.960784  
12,2,1683.653846  
12,2,1802.592949  
12,2,3843.611486  
12,2,2134.643750  
12,2,2777.333333  
12,2,7432.802083  
12,2,7126.500000  
12,2,2419.127717  
12,2,2774.149390

12,2,2818.092593  
12,2,2177.156716  
12,2,1919.803571  
12,2,2532.983696  
12,2,4303.611842  
12,2,5841.794643  
12,2,7009.244444  
12,2,2533.536364  
12,2,2465.421875  
12,2,3406.875000  
12,2,2789.512195  
12,2,1703.812500  
12,2,5509.458333  
12,2,3557.080000  
12,2,2253.464286  
12,2,3887.810345  
12,2,1796.063636  
12,2,1936.687500  
12,2,3022.435897  
12,2,8116.857143  
12,2,5004.848214  
12,2,1917.090686  
12,2,2271.847826  
12,2,9864.252907  
12,2,4696.686047  
12,2,10140.032407  
12,2,2590.394608  
12,2,2953.625000  
12,2,3362.331081  
12,2,1537.273810  
12,2,2644.500000  
12,2,2521.125000  
12,2,5183.452381  
12,2,2107.863971  
12,2,1776.632979  
12,2,67204.666667  
12,2,4680.601563  
12,2,3139.735119  
12,2,6351.187500  
12,2,1958.600000  
12,2,5211.131818  
12,2,3929.321229  
12,2,4635.659091  
12,2,1815.222222  
12,2,3249.680851  
12,2,3094.786184  
12,2,1625.540541  
12,2,9821.563776  
12,2,1619.218750  
12,2,4720.913462  
12,2,2442.187500  
12,2,3358.404762  
12,2,4890.555556  
12,2,4700.717949  
12,2,5064.893617  
12,2,2451.626506  
12,2,5211.383178  
12,2,2892.827586  
12,2,10461.281250  
12,2,1705.160714  
12,2,2090.739362  
12,2,2927.992500  
12,2,2879.342262  
12,2,1993.000000  
12,2,2659.833333  
12,2,2415.918919

12,2,2204.482143  
12,2,1576.521739  
12,2,4378.850000  
12,2,4369.618590  
12,2,3777.180556  
12,2,3701.677500  
12,2,2327.532051  
12,2,1548.006579  
12,2,5720.424107  
12,2,1594.280556  
12,2,7631.676339  
12,2,3014.192073  
12,2,5374.611979  
12,2,5002.869565  
12,2,5011.955307  
12,2,4151.947368  
12,2,2397.470930  
12,2,4059.019886  
12,2,1826.630952  
12,2,10875.034483  
12,2,1609.338235  
12,2,7389.585366  
12,2,2736.674419  
12,2,1647.427500  
12,2,1904.602459  
12,2,6728.441860  
12,2,13625.528846  
12,2,7049.460366  
12,2,1774.521429  
12,2,1675.015707  
12,2,1867.379310  
12,2,9545.239130  
12,2,2063.606818  
12,2,6425.048913  
12,2,1766.500000  
12,2,8694.698718  
12,2,5097.299465  
12,2,8025.890625  
12,2,3970.416667  
12,2,3993.062500  
12,2,2103.981061  
12,2,1526.785256  
12,2,3225.183511  
12,2,10169.510000  
12,2,1599.262195  
12,2,2979.257979  
12,2,3311.218750  
12,2,3701.836735  
12,2,3853.562500  
12,2,1540.384615  
12,2,6082.019608  
12,2,4875.750000  
12,2,3350.244898  
12,2,2596.568627  
12,2,2035.259146  
12,2,4355.000000  
12,2,1890.750000  
12,2,1925.765625  
12,2,2691.849432  
12,2,2127.858491  
12,2,2885.107143  
12,2,7691.231132  
12,2,3407.093750  
12,2,2379.981250  
12,2,5301.444444  
12,2,8119.494792

12,2,4574.639535  
12,2,2207.016667  
12,2,5288.602273  
12,2,3154.162234  
12,2,4162.831731  
12,2,2989.500000  
12,2,4180.687500  
12,2,1902.031250  
12,2,3007.654676  
12,2,1614.299020  
12,2,1661.177083  
12,2,7081.079545  
12,2,2129.908654  
12,2,2016.360795  
12,2,1815.586538  
12,2,1951.048780  
12,2,3922.989583  
12,2,7222.800000  
12,2,2531.645161  
12,2,2122.532143  
12,2,24503.250000  
12,2,1892.816327  
12,2,5531.809179  
12,2,1569.208556  
12,2,2238.911765  
12,2,3365.000000  
12,2,1571.204545  
12,2,3347.193182  
12,2,4991.782609  
12,2,2875.458333  
12,2,1977.545455  
12,2,11981.937500  
12,2,2407.825658  
12,2,2734.315789  
12,2,4519.271825  
12,2,2207.914286  
12,2,3788.958333  
12,2,1556.900641  
12,2,1567.960000  
12,2,27069.788136  
12,2,5327.368421  
12,2,12595.057203  
12,2,1733.046512  
12,2,2920.955357  
12,2,7762.200000  
12,2,2378.282609  
12,2,3191.864583  
12,2,1937.174528  
12,2,8684.540541  
12,2,6257.219355  
12,2,1591.454545  
12,2,5895.105263  
12,2,4176.759146  
12,2,3618.125000  
12,2,4392.375000  
12,2,8522.958333  
12,2,2986.390625  
12,2,2996.688953  
12,2,3572.616279  
12,2,2367.622340  
12,2,3128.880682  
12,2,2459.085366  
12,2,3019.468750  
12,2,5763.754386  
12,2,5104.777778  
12,2,2827.005814

12,2,10143.942786  
12,2,1583.691327  
12,2,8376.460526  
12,2,2763.895833  
12,2,3766.693182  
12,2,3109.453125  
12,2,2617.901316  
12,2,4917.321212  
12,2,8537.526316  
12,2,2628.409091  
12,2,1801.835227  
12,2,3231.125000  
12,2,1698.439904  
12,2,5476.300000  
12,2,2595.750000  
12,2,7128.695000  
12,2,9108.955497  
12,2,4510.700000  
12,2,37574.495000  
12,2,4502.181818  
12,2,8802.132075  
12,2,3868.535714  
12,2,1701.414894  
12,2,3314.836538  
12,2,6331.577540  
12,2,2634.089286  
12,2,4938.641509  
12,2,1985.391204  
12,2,6863.750000  
12,2,4125.084239  
12,2,6366.968750  
12,2,2312.953125  
12,2,1632.369565  
12,2,6506.000000  
12,2,1760.469388  
12,2,31077.445312  
12,2,3847.714286  
12,2,2475.172872  
12,2,2992.232558  
12,2,11874.574468  
12,2,2891.812500  
12,2,2109.536585  
12,2,1752.389163  
12,2,6717.061224  
12,2,1970.002604  
12,2,2012.714286  
12,2,3946.146552  
12,2,2980.912736  
12,2,3199.752660  
12,2,1888.435976  
12,2,4150.872727  
12,2,4921.365000  
12,2,1953.305000  
12,2,6245.252500  
12,2,1928.329545  
12,2,4142.402439  
12,2,6792.700000  
12,2,7836.000000  
12,2,5796.963235  
12,2,28535.139535  
12,2,1799.645270  
12,2,3392.312865  
12,2,1582.453125  
12,2,5292.875000  
12,2,4012.307927  
12,2,2933.636364

12,2,1913.193182  
12,2,6291.428030  
12,2,1877.521277  
12,2,3313.128049  
12,2,4689.222222  
12,2,4244.641026  
12,2,2692.455357  
12,2,5706.947368  
12,2,2587.808333  
12,2,3541.146341  
12,2,2513.375000  
12,2,9118.031250  
12,2,1562.328947  
12,2,2014.107143  
12,2,8482.954545  
12,2,4824.970000  
12,2,4534.076220  
12,2,3517.202128  
12,2,2419.976190  
12,2,2264.188679  
12,2,2926.916667  
12,2,4037.012195  
12,2,2256.500000  
12,2,1859.916667  
12,2,2976.653846  
12,2,2621.906250  
12,2,2590.994186  
12,2,1533.409722  
12,2,5842.080000  
12,2,1603.213636  
12,2,3371.334646  
12,2,1546.405405  
12,2,3724.067308  
12,2,3919.500000  
12,2,1613.888889  
12,2,3022.500000  
12,2,1982.586957  
12,2,4570.015957  
12,2,1889.272727  
12,2,2376.222561  
12,2,10498.774390  
12,2,1543.805556  
12,2,2084.452703  
12,2,2838.454787  
12,2,3930.981250  
12,2,2818.714286  
12,2,2895.381579  
12,2,10689.333333  
12,2,6330.976744  
12,2,63399.446541  
12,2,1945.709184  
12,2,2101.818182  
12,2,3512.311111  
12,2,5910.347826  
12,2,1773.847222  
12,2,2080.434028  
12,2,3036.463889  
12,2,2200.326389  
12,2,2958.332317  
12,2,2176.574468  
12,2,3141.083333  
12,2,2124.910000  
12,2,6080.596154  
12,2,13645.142857  
12,2,1852.107143  
12,2,5059.438776

12,2,1743.772727  
12,2,4487.323232  
12,2,5753.287190  
12,2,7796.847826  
12,2,4695.871951  
12,2,4337.178571  
12,2,6986.832447  
12,2,2177.783069  
12,2,16869.500000  
12,2,2635.720588  
12,2,2538.205882  
12,2,1934.239130  
12,2,2869.769737  
12,2,7003.845745  
12,2,2806.433824  
12,2,1814.113636  
12,2,2663.333333  
12,2,2786.416667  
12,2,1549.852564  
12,2,3332.062500  
12,2,1759.350490  
12,2,2859.865854  
12,2,2014.072222  
12,2,2474.300000  
12,2,2283.205128  
12,2,2082.195000  
12,2,6157.636364  
12,2,4990.199405  
12,2,18146.010000  
12,2,2788.750000  
12,2,2784.729167  
12,2,2661.344444  
12,2,4926.582447  
12,2,4969.901961  
12,2,3571.744186  
12,2,2196.950000  
12,2,2434.702128  
12,2,1541.655556  
12,2,4531.609043  
12,2,2959.029891  
12,2,2819.451389  
12,2,3079.625000  
12,2,3246.383929  
12,2,1943.911111  
12,2,1961.736842  
12,2,6265.400000  
12,2,5922.052083  
12,2,5460.476744  
12,2,4570.785714  
12,2,2194.777174  
12,2,2827.313679  
12,2,2732.916667  
12,2,4544.636364  
12,2,1526.750000  
12,2,4270.433333  
12,2,1517.625000  
12,2,7586.755208  
12,2,1951.048828  
12,2,2400.781250  
12,2,2148.179487  
12,2,2946.732143  
12,2,2396.520408  
12,2,5664.528061  
12,2,2144.819712  
12,2,5284.983696  
12,2,1796.223684

12,2,80517.000000  
12,2,4326.027174  
12,2,1540.267442  
12,2,2201.557292  
12,2,6968.625000  
12,2,1553.384868  
12,2,2202.023256  
12,2,3080.321256  
12,2,8165.680851  
12,2,1899.864130  
12,2,1745.536111  
12,2,7497.529255  
12,2,51140.739865  
12,2,10208.780488  
12,2,2729.047872  
12,2,2525.750000  
12,2,18652.298246  
12,2,2210.794271  
12,2,4854.722222  
12,2,7654.125000  
12,2,6687.319149  
12,2,1802.015707  
12,2,1836.492188  
12,2,2860.579268  
12,2,1933.020833  
12,2,29076.896226  
12,2,2576.698113  
12,2,1673.000000  
12,2,1692.767442  
12,2,3418.568750  
12,2,2644.800000  
12,2,2243.438953  
12,2,4653.224490  
12,2,6944.679245  
12,2,1526.169811  
12,2,3114.531250  
12,2,2870.250000  
12,2,1705.000000  
12,2,45372.892045  
12,2,4969.833333  
12,2,2610.302857  
12,2,1742.642857  
12,2,8113.524038  
12,2,6528.952273  
12,2,3989.500000  
12,2,1635.171875  
12,2,1995.163690  
12,2,3780.890000  
12,2,2334.360000  
12,2,3637.888587  
12,2,1776.095745  
12,2,8022.747283  
12,2,5214.404255  
12,2,6400.461957  
12,2,2121.960784  
12,2,3744.777778  
12,2,1535.031250  
12,2,2959.598039  
12,2,4693.653846  
12,2,5873.710938  
12,2,5684.340278  
12,2,10661.013393  
12,2,4813.918750  
12,2,2136.846154  
12,2,8015.531977  
12,2,5038.742063

12,2,3143.627451  
12,2,8602.471698  
12,2,2190.627660  
12,2,2538.280488  
12,2,8767.583333  
12,2,4233.875000  
12,2,4842.775000  
12,2,2581.000000  
12,2,11118.806011  
12,2,1796.713415  
12,2,2100.365385  
12,2,4258.151316  
12,2,5575.875000  
12,2,2231.543605  
12,2,2845.079545  
12,2,3968.951220  
12,2,2932.732955  
12,2,2100.266827  
12,2,2144.201613  
12,2,3548.604651  
12,2,1608.164773  
12,2,2271.646739  
12,2,3147.096154  
12,2,1554.431818  
12,2,2133.381250  
12,2,4226.012626  
12,2,2257.754808  
12,2,2536.028571  
12,2,1562.325000  
12,2,2713.391204  
12,2,4537.673077  
12,2,8062.368421  
12,2,4353.883721  
12,2,2789.045455  
12,2,11843.500000  
12,2,2830.471591  
12,2,3485.710843  
12,2,16186.844444  
12,2,3782.395349  
12,2,5254.222917  
12,2,2460.835938  
12,2,14926.156977  
12,2,2717.287162  
12,2,1751.006944  
12,2,2693.410714  
12,2,3101.260246  
12,2,2294.923780  
12,2,7781.072115  
12,2,4628.012195  
12,2,1859.435897  
12,2,2223.055556  
12,2,14818.197044  
12,2,1809.458333  
12,2,2007.011364  
12,2,4902.875000  
12,2,6425.738636  
12,2,2487.971154  
12,2,2058.296296  
12,2,3990.320652  
12,2,5500.024390  
12,2,2525.781250  
12,2,2200.475352  
12,2,6446.450980  
12,2,1769.277778  
12,2,1794.642442  
12,2,7090.452830

12,2,2421.312500  
12,2,4545.357143  
12,2,4377.611842  
12,2,1546.674419  
12,2,18418.250000  
12,2,21828.250000  
12,2,2003.169811  
12,2,4257.244444  
12,2,3337.259459  
12,2,4250.535714  
12,2,3854.187500  
12,2,11768.139706  
12,2,5472.326923  
12,2,3713.496429  
12,2,2550.321429  
12,2,1574.444444  
12,2,12147.869565  
12,2,13739.462719  
12,2,1772.614035  
12,2,6425.516588  
12,2,9098.372093  
12,2,2867.710106  
12,2,8750.480978  
12,2,2341.540865  
12,2,5421.679688  
12,2,4193.741477  
12,2,4529.190476  
12,2,10329.062500  
12,2,2834.289062  
12,2,2533.558140  
12,2,2268.258523  
12,2,2031.335000  
12,2,4131.076923  
12,2,3232.650000  
12,2,3892.408537  
12,2,3897.047619  
12,2,4465.348837  
12,2,4238.239865  
12,2,1696.396739  
12,2,7384.666667  
12,2,1777.437500  
12,2,4348.903226  
12,2,2879.750000  
12,2,1586.632075  
12,2,2387.468085  
12,2,1620.714623  
12,2,4683.218085  
12,2,3877.192935  
12,2,18507.092025  
12,2,3527.236111  
12,2,5760.653061  
12,2,1888.179878  
12,2,4548.826087  
12,2,2204.712500  
12,2,1804.705882  
12,2,1542.086207  
12,2,7795.562500  
12,2,3905.896277  
12,2,3818.302632  
12,2,6864.170732  
12,2,1920.011364  
12,2,2971.768868  
12,2,2813.057692  
12,2,3581.385417  
12,2,1777.414894  
12,2,3780.525943

12,2,1793.771635  
12,2,9769.187500  
12,2,1608.922619  
12,2,4296.747500  
12,2,3932.695652  
12,2,9960.760870  
12,2,2903.733333  
12,2,1956.685811  
12,2,9470.695312  
12,2,1965.278846  
12,2,2391.650000  
12,2,1692.977941  
12,2,3333.410714  
12,2,3009.853571  
12,2,2311.561224  
12,2,3967.471591  
12,2,3456.625000  
12,2,3226.288690  
12,2,6549.609694  
12,2,1578.603774  
12,2,2775.636364  
12,2,1958.818182  
12,2,1753.000000  
12,2,4597.612500  
12,2,1689.428571  
12,2,1971.173295  
12,2,6378.454787  
12,2,4409.388889  
12,2,4659.000000  
12,2,26399.710648  
12,2,2080.342262  
12,2,1650.519231  
12,2,1514.275000  
12,2,4535.713115  
12,2,4852.857558  
12,2,4298.897959  
12,2,4067.210106  
12,2,1933.003289  
12,2,7856.814189  
12,2,2861.054054  
12,2,6737.488372  
12,2,6677.437500  
12,2,4558.926887  
12,2,1778.060897  
12,2,6378.785714  
12,2,1584.430147  
12,2,8906.468085  
12,2,1599.812500  
12,2,2950.692857  
12,2,1736.593750  
12,2,17006.562500  
12,2,1826.744186  
12,2,2675.351351  
12,2,2028.138298  
12,2,2343.098404  
12,2,8583.109091  
12,2,3505.828947  
12,2,5958.645833  
12,2,3629.087121  
12,2,2137.196429  
12,2,2743.721875  
12,2,6767.284091  
12,2,2081.140625  
12,2,2128.587766  
12,2,1749.688889  
12,2,2038.782609

12,2,9067.529412  
12,2,3737.223958  
12,2,2687.276596  
12,2,2462.227273  
12,2,1736.974359  
12,2,11350.586957  
12,2,2675.640625  
12,2,2406.817073  
12,2,5651.113636  
12,2,2224.095000  
12,2,2327.150000  
12,2,2419.893182  
12,2,6271.797500  
12,2,2423.569444  
12,2,3371.783251  
12,2,2155.461538  
12,2,2729.979592  
12,2,9022.295259  
12,2,3687.204082  
12,2,1723.819672  
12,2,6443.875000  
12,2,4941.750000  
12,2,58579.346939  
12,2,4191.198980  
12,2,3208.705357  
12,2,6131.260204  
12,2,2133.292614  
12,2,3381.051020  
12,2,4895.142857  
12,2,1606.906250  
12,2,2073.205556  
12,2,4253.750000  
12,2,6151.213636  
12,2,2895.340426  
12,2,1973.377907  
12,2,3983.816860  
12,2,2933.187500  
12,2,1594.620192  
12,2,2411.386792  
12,2,12007.734091  
12,2,3396.820755  
12,2,5779.765957  
12,2,3093.879167  
12,2,6253.333333  
12,2,3099.536290  
12,2,2135.992857  
12,2,1697.407583  
12,2,1511.600000  
12,2,1771.666667  
12,2,7569.933673  
12,2,2350.694149  
12,2,1726.495098  
12,2,2727.731707  
12,2,8798.490066  
12,2,1753.783019  
12,2,4742.972561  
12,2,1991.400000  
12,2,10256.250000  
12,2,1893.686170  
12,2,2947.000000  
12,2,13876.272917  
12,2,2274.439024  
12,2,4970.022727  
12,2,4396.871711  
12,2,2309.240000  
12,2,2392.532738

12,2,2612.275000  
12,2,5045.125000  
12,2,5008.336111  
12,2,2958.133621  
12,2,1777.333333  
12,2,2094.765000  
12,2,2153.083333  
12,2,3445.919811  
12,2,5068.454545  
12,2,5663.355263  
12,2,1985.596154  
12,2,4852.971154  
12,2,2051.454545  
12,2,2636.170732  
12,2,1768.471154  
12,2,4271.732843  
12,2,3378.591216  
12,2,1527.467262  
12,2,1744.474432  
12,2,2152.310345  
12,2,1918.791667  
12,2,14087.556818  
12,2,6373.938776  
12,2,2975.628289  
12,2,6505.625000  
12,2,3696.658163  
12,2,3223.217391  
12,2,4100.875000  
12,2,8122.077206  
12,2,1659.978261  
12,2,2504.164062  
12,2,2686.367188  
12,2,3198.309091  
12,2,2485.071429  
12,2,1863.401163  
12,2,3090.476190  
12,2,4476.619048  
12,2,5935.940299  
12,2,2447.527027  
12,2,4315.113208  
12,2,2670.000000  
12,2,2137.885870  
12,2,3474.718750  
12,2,2400.504386  
12,2,2133.568047  
12,2,4097.156250  
12,2,6822.081081  
12,2,3024.437500  
12,2,1706.406250  
12,2,3724.750000  
12,2,5263.765306  
12,2,2694.020833  
12,2,2686.660000  
12,2,2627.812500  
12,2,3997.959184  
12,2,2489.346939  
12,2,1513.760870  
12,2,3842.865854  
12,2,1667.665000  
12,2,148179.913462  
12,2,2854.942308  
12,2,4431.680000  
12,2,6827.379717  
12,2,2158.043750  
12,2,3608.511905  
12,2,7460.463054

12,2,2506.287879  
12,2,4178.200000  
12,2,8074.771127  
12,2,4302.227273  
12,2,2362.187500  
12,2,1832.739130  
12,2,3071.245536  
12,2,3706.185629  
12,2,16431.365724  
12,2,2959.372093  
12,2,1924.000000  
12,2,2104.434783  
12,2,2682.106707  
12,2,4949.888889  
12,2,5573.247881  
12,2,5993.728723  
12,2,3627.303279  
12,2,1511.809659  
12,2,6179.200000  
12,2,7460.758523  
12,2,2451.806818  
12,2,1622.250000  
12,2,2880.361111  
12,2,5246.735714  
12,2,7740.611111  
12,2,1598.116279  
12,2,4795.996988  
12,2,1628.062500  
12,2,1911.273810  
12,2,6553.175926  
12,2,1898.743421  
12,2,7074.067935  
12,2,5178.285714  
12,2,1963.914894  
12,2,6530.239362  
12,2,1899.713235  
12,2,1716.027907  
12,2,2401.388158  
12,2,5356.729730  
12,2,4872.671512  
12,2,1682.648438  
12,2,5258.425000  
12,2,3480.565217  
12,2,6336.234375  
12,2,1716.583333  
12,2,13888.928571  
12,2,2826.109375  
12,2,2900.250000  
12,2,3253.547170  
12,2,2029.099057  
12,2,1865.505682  
12,2,13905.429268  
12,2,2535.356383  
12,2,10778.222222  
12,2,4674.917553  
12,2,1544.357143  
12,2,2162.297619  
12,2,2255.488636  
12,2,2091.479592  
12,2,4465.763889  
12,2,3220.643617  
12,2,1970.943182  
12,2,3182.962963  
12,2,1825.969697  
12,2,2821.512500  
12,2,3148.854167

12,2,4211.345930  
12,2,5067.500000  
12,2,4947.791667  
12,2,2315.935897  
12,2,2343.709302  
12,2,12034.111111  
12,2,1645.329327  
12,2,3890.480469  
12,2,2815.485849  
12,2,2254.105769  
12,2,1688.804878  
12,2,2662.389744  
12,2,1613.871069  
12,2,6480.701087  
12,2,3707.285714  
12,2,2972.902778  
12,2,2707.765625  
12,2,4042.500000  
12,2,1738.956250  
12,2,2242.790541  
12,2,4781.714286  
12,2,1812.260000  
12,2,1946.259615  
12,2,2138.757500  
12,2,7137.593750  
12,2,2068.901961  
12,2,2987.991935  
12,2,4150.452128  
12,2,3312.554878  
12,2,2263.138393  
12,2,1987.446429  
12,2,4808.274390  
12,2,2055.280000  
12,2,3876.833333  
12,2,6526.677083  
12,2,3189.076923  
12,2,1639.589286  
12,2,3532.750000  
12,2,2568.687500  
12,2,5161.125000  
12,2,1809.545455  
12,2,2402.061224  
12,2,4035.394231  
12,2,1896.690909  
12,2,6095.112245  
12,2,6573.298246  
12,2,4275.830189  
12,2,1645.260766  
12,2,9989.174342  
12,2,4349.441489  
12,2,8990.989754  
12,2,1704.546053  
12,2,1919.833333  
12,2,6860.050000  
12,2,2196.244186  
12,2,5616.015000  
12,2,4190.583333  
12,2,3213.497024  
12,2,2573.276596  
12,2,2249.100000  
12,2,3546.750000  
12,2,4406.860577  
12,2,2976.531250  
12,2,3200.445122  
12,2,2762.680328  
12,2,2705.497159

12,2,1592.391061  
12,2,6600.476190  
12,2,6205.083333  
12,2,7873.299180  
12,2,3133.204082  
12,2,3967.205556  
12,2,11469.747500  
12,2,8316.232143  
12,2,2225.647059  
12,2,4526.040816  
12,2,7755.051471  
12,2,4463.803191  
12,2,2856.427500  
12,2,2576.522727  
12,2,4108.962766  
12,2,3419.944444  
12,2,7064.938830  
12,2,3300.125000  
12,2,1681.723837  
12,2,4159.159574  
12,2,3602.166667  
12,2,4712.173469  
12,2,1523.585165  
12,2,1732.366667  
12,2,1875.413889  
12,2,5854.243902  
12,2,2851.769231  
12,2,3853.708333  
12,2,8847.634615  
12,2,2969.964286  
12,2,2583.609375  
12,2,3495.735294  
12,2,2011.869565  
12,2,4092.695652  
12,2,2792.849057  
12,2,2322.245455  
12,2,1706.462209  
12,2,2976.510638  
12,2,2156.932432  
12,2,9746.559211  
12,2,2877.739362  
12,2,1569.183673  
12,2,6587.833333  
12,2,1745.196429  
12,2,1562.050000  
12,2,3110.451220  
12,2,2279.428571  
12,2,4091.607143  
12,2,6216.338983  
12,2,3429.804348  
12,2,4401.925000  
12,2,3625.556818  
12,2,2595.415541  
12,2,4983.461538  
12,2,3699.964286  
12,2,6005.511236  
12,2,2829.270588  
12,2,7157.266854  
12,2,1629.385714  
12,2,4018.554545  
12,2,1976.888021  
12,2,6595.982857  
12,2,2299.090116  
12,2,5330.877778  
12,2,4247.420082  
12,2,1953.805000

12,2,6162.507853  
12,2,4437.620192  
12,2,2055.224359  
12,2,2267.925676  
12,2,2025.974138  
12,2,2319.823529  
12,2,9066.239796  
12,2,1504.013158  
12,2,11025.278049  
12,2,16252.627273  
12,2,2463.729839  
12,2,1877.678571  
12,2,1911.989362  
12,2,2280.758333  
12,2,3625.835938  
12,2,5517.880000  
12,2,4335.085366  
12,2,1732.352273  
12,2,12582.578947  
12,2,2195.500000  
12,2,3329.142045  
12,2,3871.451220  
12,2,5989.244681  
12,2,2626.800000  
12,2,1642.250000  
12,2,4807.367347  
12,2,2377.739130  
12,2,2703.078125  
12,2,4431.982843  
12,2,2358.025000  
12,2,2948.173077  
12,2,3116.463068  
12,2,2807.040625  
12,2,2668.456395  
12,2,1958.427500  
12,2,7786.038462  
12,2,1935.636719  
12,2,7779.358974  
12,2,6423.410714  
12,2,2221.273148  
12,2,5074.963415  
12,2,3721.003289  
12,2,6654.577830  
12,2,2657.473837  
12,2,3077.050000  
12,2,5022.550000  
12,2,1612.141304  
12,2,2464.562500  
12,2,1661.687500  
12,2,4454.719388  
12,2,2427.056122  
12,2,2385.459677  
12,2,5384.184524  
12,2,1548.875000  
12,2,2922.111111  
12,2,4601.000000  
12,2,5720.315625  
12,2,5432.609375  
12,2,1728.000000  
12,2,1565.100000  
12,2,1576.681818  
12,2,20185.817857  
12,2,3384.536585  
12,2,6297.820312  
12,2,1790.044118  
12,2,2256.649510

12,2,8063.486842  
12,2,1864.026042  
12,2,4741.529412  
12,2,5931.041667  
12,2,1850.669444  
12,2,1874.508721  
12,2,2062.946108  
12,2,7779.790541  
12,2,3813.826923  
12,2,2316.206395  
12,2,5033.928571  
12,2,1616.815217  
12,2,8812.228516  
12,2,13121.858586  
12,2,3567.233333  
12,2,7860.500000  
12,2,2094.162500  
12,2,2648.807692  
12,2,3010.428571  
12,2,4863.608333  
12,2,2384.991071  
12,2,1765.508721  
12,2,2094.700000  
12,2,1683.050000  
12,2,2718.650000  
12,2,2666.664773  
12,2,6051.717500  
12,2,7663.833333  
12,2,2867.000000  
12,2,5256.595109  
12,2,3282.560109  
12,2,6385.559375  
12,2,4977.691964  
12,2,3223.500000  
12,2,3230.065972  
12,2,7143.892241  
12,2,22257.016447  
12,2,4582.201220  
12,2,2872.517857  
12,2,2886.603365  
12,2,4975.395349  
12,2,1537.000000  
12,2,3498.877717  
12,2,4607.773707  
12,2,7495.600000  
12,2,2668.804348  
12,2,1912.210938  
12,2,3654.469512  
12,2,2072.697222  
12,2,2843.348684  
12,2,7782.781250  
12,2,6074.818627  
12,2,1635.714674  
12,2,1617.000000  
12,2,1796.627604  
12,2,3866.187500  
12,2,2240.799242  
12,2,5817.737500  
12,2,3423.783582  
12,2,5188.744681  
12,2,6875.326923  
12,2,5016.468137  
12,2,5180.725410  
12,2,8588.546875  
12,2,3466.372549  
12,2,1704.816327

12,2,2943.398256  
12,2,3020.806250  
12,2,1566.823718  
12,2,2068.674419  
12,2,2080.954545  
12,2,2687.892241  
12,2,4015.948113  
12,2,5404.188492  
12,2,3667.078125  
12,2,3489.881250  
12,2,3306.488208  
12,2,6697.572115  
12,2,5660.691667  
12,2,2824.737500  
12,2,1854.527778  
12,2,2649.156250  
12,2,4684.854167  
12,2,5321.523256  
12,2,3361.316129  
12,2,2952.703608  
12,2,2316.393868  
12,2,2579.666667  
12,2,1665.722826  
12,2,1852.250000  
12,2,2062.500000  
12,2,1817.220395  
12,2,18433.280488  
12,2,1640.038194  
12,2,1671.906250  
12,2,5068.329787  
12,2,4731.567073  
12,2,3345.833333  
12,2,1670.114583  
12,2,83214.226064  
12,2,2859.277778  
12,2,3049.367021  
12,2,4944.166667  
12,2,8967.571429  
12,2,5273.428571  
12,2,2364.625000  
12,2,1825.032895  
12,2,1547.187500  
12,2,1923.693878  
12,2,2432.030612  
12,2,6429.272727  
12,2,2290.197222  
12,2,3910.129032  
12,2,6592.713542  
12,2,3278.591837  
12,2,4860.652174  
12,2,1924.974057  
12,2,3526.018519  
12,2,1927.138889  
12,2,2648.988208  
12,2,4357.977273  
12,2,1756.239796  
12,2,3174.088068  
12,2,2214.913043  
12,2,2324.600000  
12,2,2136.896739  
12,2,7430.100000  
12,2,5698.692308  
12,2,1934.941176  
12,2,6042.673575  
12,2,4730.869822  
12,2,5587.305851

12,2,1858.666667  
12,2,1809.526786  
12,2,12294.118421  
12,2,1808.425000  
12,2,2699.744898  
12,2,2143.329843  
12,2,3433.027027  
12,2,5263.467391  
12,2,1506.875000  
12,2,5471.948113  
12,2,2118.157143  
12,2,6016.613208  
12,2,1730.376963  
12,2,2611.036585  
12,2,2368.744681  
12,2,1692.620098  
12,2,2407.666667  
12,2,3866.984375  
12,2,1660.017500  
12,2,1838.118421  
12,2,2343.880435  
12,2,3657.826923  
12,2,1991.004717  
12,2,7764.403846  
12,2,1552.515957  
12,2,4109.445175  
12,2,6980.104167  
12,2,3266.911885  
12,2,1768.125000  
12,2,2035.183036  
12,2,1804.428571  
12,2,2300.635870  
12,2,4414.355932  
12,2,3270.494681  
12,2,4905.464674  
12,2,3221.205556  
12,2,2512.852273  
12,2,4958.187500  
12,2,8986.912281  
12,2,1525.180000  
12,2,2986.167453  
12,2,1667.574324  
12,2,2070.832386  
12,2,3864.185897  
12,2,2318.544444  
12,2,4960.919643  
12,2,6255.200000  
12,2,4036.416279  
12,2,3766.500000  
12,2,3924.141667  
12,2,3437.957447  
12,2,2433.084906  
12,2,3222.188830  
12,2,2071.550000  
12,2,2160.050000  
12,2,3002.203125  
12,2,1605.747159  
12,2,2228.488372  
12,2,4282.137755  
12,2,3254.468750  
12,2,10281.802083  
12,2,5867.540541  
12,2,3308.704819  
12,2,2176.120000  
12,2,5409.364865  
12,2,1936.500000

12,2,3701.385638  
12,2,3463.166667  
12,2,2916.015244  
12,2,6617.265957  
12,2,3367.928191  
12,2,2459.068878  
12,2,3937.298611  
12,2,6477.310160  
12,2,3803.848404  
12,2,5607.057692  
12,2,1621.648810  
12,2,1792.675000  
12,2,2345.830508  
12,2,3990.000000  
12,2,5207.000000  
12,2,3142.235294  
12,2,2266.857143  
12,2,1892.359694  
12,2,6437.979730  
12,2,3379.300481  
12,2,17226.072368  
12,2,63966.000000  
12,2,1655.690104  
12,2,1847.835648  
12,2,5640.568182  
12,2,2133.972826  
12,2,3326.053571  
12,2,4622.152174  
12,2,1967.000000  
12,2,3917.416667  
12,2,4037.417614  
12,2,2296.500000  
12,2,3679.050000  
12,2,2915.590625  
12,2,4772.467949  
12,2,6049.480000  
12,2,7200.577869  
12,2,4208.000000  
12,2,3152.695000  
12,2,2692.036585  
12,2,1539.645833  
12,2,3113.865385  
12,2,1830.574468  
12,2,3906.240132  
12,2,4685.645000  
12,2,1840.595109  
12,2,3544.496528  
12,2,1998.327128  
12,2,6252.802632  
12,2,3605.523529  
12,2,4619.500000  
12,2,2663.423295  
12,2,3972.497093  
12,2,1902.891026  
12,2,3694.397436  
12,2,2054.410256  
12,2,7703.099432  
12,2,3393.969298  
12,2,2270.812500  
12,2,4512.382979  
12,2,5047.720930  
12,2,41924.988889  
12,2,1508.025943  
12,2,1925.392500  
12,2,3625.750000  
12,2,5698.956522

12,2,2235.387255  
12,2,2158.250000  
12,2,2670.553191  
12,2,13185.904167  
12,2,1761.906250  
12,2,2398.286111  
12,2,3050.303191  
12,2,4567.345930  
12,2,4174.766667  
12,2,2470.518750  
12,2,4597.458333  
12,2,1548.260204  
12,2,2233.076923  
12,2,1807.351351  
12,2,1848.215686  
12,2,1556.889610  
12,2,12563.578947  
12,2,2511.109375  
12,2,2422.468085  
12,2,2171.297203  
12,2,1839.893048  
12,2,1973.603365  
12,2,2132.420455  
12,2,2209.800481  
12,2,6799.022222  
12,2,1972.207865  
12,2,2246.334507  
12,2,3978.312500  
12,2,1759.308824  
12,2,5052.325581  
12,2,2765.621711  
12,2,2189.795918  
12,2,4986.953125  
12,2,8918.583333  
12,2,2110.416667  
12,2,6445.336735  
12,2,3344.119565  
12,2,2305.480263  
12,2,1798.723404  
12,2,2930.250000  
12,2,5984.610465  
12,2,2899.966667  
12,2,1596.548387  
12,2,7453.466667  
12,2,6816.969444  
12,2,1838.804878  
12,2,1694.483553  
12,2,3056.600000  
12,2,11692.642857  
12,2,1857.200000  
12,2,6041.928571  
12,2,3271.692568  
12,2,1763.972973  
12,2,2017.314189  
12,2,12978.726415  
12,2,8321.750000  
12,2,1686.625000  
12,2,7159.859296  
12,2,10247.521739  
12,2,4198.056604  
12,2,3615.920213  
12,2,1538.076923  
12,2,12545.900943  
12,2,11603.529412  
12,2,7712.312500  
12,2,1866.173295

12,2,1894.523585  
12,2,12143.671875  
12,2,2268.955556  
12,2,3410.081395  
12,2,11344.555556  
12,2,4829.882979  
12,2,5336.802326  
12,2,3147.041667  
12,2,6007.203488  
12,2,4575.281780  
12,2,1508.154762  
12,2,1847.000000  
12,2,2718.569853  
12,2,1814.942935  
12,2,2851.777778  
12,2,2486.485294  
12,2,2923.117925  
12,2,2793.047222  
12,2,3284.173913  
12,2,8529.268293  
12,2,2137.980392  
12,2,2362.110294  
12,2,3145.691176  
12,2,2425.319149  
12,2,2022.722222  
12,2,1880.843750  
12,2,2715.395408  
12,2,3758.894022  
12,2,2667.603723  
12,2,2972.113636  
12,2,2308.932692  
12,2,1784.054878  
12,2,2125.375000  
12,2,1680.311558  
12,2,1735.467105  
12,2,3423.729787  
12,2,4698.045161  
12,2,6586.520000  
12,2,4547.076531  
12,2,1598.588235  
12,2,3353.662162  
12,2,9147.411765  
12,2,2430.380597  
12,2,7982.649123  
12,2,3960.500000  
12,2,4005.951613  
12,2,3754.367647  
12,2,2923.104167  
12,2,1549.625000  
12,2,2194.260870  
12,2,3801.412791  
12,2,3642.195122  
12,2,2311.250000  
12,2,3424.818182  
12,2,2309.410714  
12,2,2333.691327  
12,2,2265.996324  
12,2,1751.500000  
12,2,2347.631579  
12,2,3495.737805  
12,2,1738.164773  
12,2,8573.927273  
12,2,5057.787791  
12,2,1981.178571  
12,2,4987.083721  
12,2,6976.934673

12,2,4900.468085  
12,2,3647.848214  
12,2,1906.263158  
12,2,3040.250000  
12,2,1742.441176  
12,2,2056.065217  
12,2,1657.366071  
12,2,1976.750000  
12,2,2086.138298  
12,2,1733.196078  
12,2,2594.583333  
12,2,2960.500000  
12,2,1684.013587  
12,2,3413.455729  
12,2,3334.513158  
12,2,2966.651515  
12,2,1829.416667  
12,2,4895.566489  
12,2,2805.152439  
12,2,2898.272059  
12,2,4124.277778  
12,2,1683.838415  
12,2,1737.712766  
12,2,5109.795455  
12,2,1763.833333  
12,2,1577.932432  
12,2,7046.640306  
12,2,4440.574468  
12,2,5150.522222  
12,2,2455.527027  
12,2,5035.802885  
12,2,1756.081897  
12,2,19560.565022  
12,2,2237.608696  
12,2,2059.163462  
12,2,1958.836538  
12,2,2863.127660  
12,2,4368.769397  
12,2,11952.625000  
12,2,3271.510204  
12,2,1643.562500  
12,2,2338.235294  
12,2,1774.365591  
12,2,1979.843750  
12,2,1629.783654  
12,2,7683.875000  
12,2,2646.218750  
12,2,2489.304348  
12,2,1828.565341  
12,2,2777.644231  
12,2,4664.121429  
12,2,1563.514286  
12,2,2107.818182  
12,2,2728.388889  
12,2,4539.176471  
12,2,2952.894737  
12,2,2722.125000  
12,2,45726.727273  
12,2,14752.437500  
12,2,1799.952703  
12,2,2086.621622  
12,2,4755.827160  
12,2,13581.024306  
12,2,2521.166667  
12,2,2223.100610  
12,2,1619.000000

12,2,3040.051887  
12,2,2710.478814  
12,2,4372.413462  
12,2,5981.645833  
12,2,1562.687500  
12,2,1676.000000  
12,2,2956.958333  
12,2,5651.903061  
12,2,5178.341837  
12,2,3921.130859  
12,2,3835.875000  
12,2,2844.176471  
12,2,9638.464286  
12,2,2226.477273  
12,2,2266.331522  
12,2,2051.765625  
12,2,2402.365000  
12,2,5043.726064  
12,2,4809.720588  
12,2,5272.681818  
12,2,2822.867188  
12,2,2234.404605  
12,2,1619.096591  
12,2,5533.974490  
12,2,2149.670455  
12,2,5049.462500  
12,2,5424.321429  
12,2,3455.154762  
12,2,4037.000000  
12,2,14515.585106  
12,2,5162.170213  
12,2,2276.783537  
12,2,5009.401163  
12,2,5943.709821  
12,2,5314.225000  
12,2,2772.971429  
12,2,6234.652439  
12,2,1747.500000  
12,2,4127.076355  
12,2,7001.252604  
12,2,3616.862069  
12,2,2045.648649  
12,2,5195.875000  
12,2,4465.558824  
12,2,1986.944444  
12,2,8648.828804  
12,2,2623.157895  
12,2,8882.315789  
12,2,4269.669271  
12,2,4145.094444  
12,2,1611.850000  
12,2,5573.986607  
12,2,3516.984615  
12,2,1878.478723  
12,2,1633.666667  
12,2,6558.842593  
12,2,2403.850694  
12,2,2626.586957  
12,2,4829.658537  
12,2,2144.094512  
12,2,1983.078804  
12,2,2387.068182  
12,2,6415.567708  
12,2,4734.472500  
12,2,2451.642857  
12,2,3080.098558

12,2,12814.959184  
12,2,1679.500000  
12,2,5569.611111  
12,2,1929.410377  
12,2,1549.821429  
12,2,1986.819149  
12,2,6877.370370  
12,2,1576.800481  
12,2,6047.652439  
12,2,8707.100000  
12,2,8887.634146  
12,2,18095.452703  
12,2,4903.725000  
12,2,3042.921875  
12,2,3892.715517  
12,2,2481.595588  
12,2,2164.178125  
12,2,2241.048780  
12,2,5646.220238  
12,2,8389.769886  
12,2,2661.582447  
12,2,2180.961538  
12,2,1769.658537  
12,2,2120.895833  
12,2,9106.419872  
12,2,1659.137255  
12,2,1997.736413  
12,2,37855.625000  
12,2,5711.008929  
12,2,3376.325581  
12,2,4391.390000  
12,2,2328.173077  
12,2,4766.659574  
12,2,2324.875000  
12,2,5997.125000  
12,2,3033.762295  
12,2,1755.696429  
12,2,3087.030000  
12,2,3663.364641  
12,2,2881.265306  
12,2,6790.771739  
12,2,2064.828947  
12,2,2887.457447  
12,2,3506.379630  
12,2,1541.250000  
12,2,1663.762500  
12,2,2982.500000  
12,2,1642.073171  
12,2,7066.743842  
12,2,6347.377976  
12,2,1901.689655  
12,2,2474.651163  
12,2,10222.656250  
12,2,4510.237143  
12,2,9434.194313  
12,2,5205.977011  
12,2,1640.221429  
12,2,3071.125000  
12,2,1920.630682  
12,2,5923.478571  
12,2,1506.576271  
12,2,7590.250000  
12,2,2132.296875  
12,2,1757.833333  
12,2,2660.094828  
12,2,5869.703125

12,2,1872.660000  
12,2,1718.692130  
12,2,10950.052083  
12,2,5062.349432  
12,2,2185.918367  
12,2,4180.948052  
12,2,3302.595092  
12,2,1528.005025  
12,2,6485.785714  
12,2,8914.181122  
12,2,2107.707547  
12,2,5207.226415  
12,2,4322.206395  
12,2,2072.879237  
12,2,4233.351562  
12,2,3154.086538  
12,2,1977.961538  
12,2,2513.579268  
12,2,1572.031447  
12,2,2063.417553  
12,2,3136.571429  
12,2,3317.142857  
12,2,1904.685976  
12,2,1628.055556  
12,2,2667.552083  
12,2,8304.010638  
12,2,2188.897849  
12,2,3963.794444  
12,2,3253.505319  
12,2,21762.714286  
12,2,6686.229167  
12,2,2254.571078  
12,2,4126.560209  
12,2,2244.500000  
12,2,1713.771930  
12,2,2328.429688  
12,2,2413.216216  
12,2,5975.062500  
12,2,2582.675926  
12,2,17408.764205  
12,2,6414.250000  
12,2,1835.125000  
12,2,2993.971939  
12,2,1981.219388  
12,2,1787.211538  
12,2,3451.869565  
12,2,1537.147436  
12,2,2257.993056  
12,2,2734.318966  
12,2,3872.721154  
12,2,7333.750000  
12,2,3572.641304  
12,2,2517.470930  
12,2,6568.428571  
12,2,7796.377778  
12,2,3238.250000  
12,2,1578.602273  
12,2,1591.368421  
12,2,3780.586538  
12,2,2233.841667  
12,2,2803.329670  
12,2,3846.199367  
12,2,3134.822368  
12,2,2926.851190  
12,2,33722.146341  
12,2,2174.979167

12,2,7762.437500  
12,2,1965.530405  
12,2,5207.222727  
12,2,1511.410256  
12,2,4219.688053  
12,2,5603.967033  
12,2,11203.529126  
12,2,3073.627907  
12,2,2969.218750  
12,2,1785.179487  
12,2,2010.307065  
12,2,2989.698980  
12,2,2024.686275  
12,2,1513.952128  
12,2,2523.136364  
12,2,2603.000000  
12,2,7844.574405  
12,2,4180.541667  
12,2,14040.942308  
12,2,3431.448864  
12,2,2040.807500  
12,2,2416.334375  
12,2,7955.527174  
12,2,4172.357143  
12,2,1607.795918  
12,2,5257.053030  
12,2,2244.088235  
12,2,4503.483796  
12,2,2658.734694  
12,2,3538.284091  
12,2,2850.144444  
12,2,4974.345000  
12,2,2406.524510  
12,2,2043.477941  
12,2,5553.760204  
12,2,4876.659884  
12,2,5199.516667  
12,2,2722.734375  
12,2,6265.888889  
12,2,12321.110169  
12,2,1688.666667  
12,2,5249.409091  
12,2,2083.552083  
12,2,2462.890710  
12,2,3608.534884  
12,2,1772.416667  
12,2,7899.696429  
12,2,38855.176471  
12,2,5189.803125  
12,2,2781.778125  
12,2,1749.781250  
12,2,1839.990385  
12,2,1876.191176  
12,2,2721.125000  
12,2,2720.625000  
12,2,3592.948864  
12,2,9510.421196  
12,2,2615.695364  
12,2,2344.625000  
12,2,2322.729167  
12,2,6231.687500  
12,2,4738.102041  
12,2,2629.350610  
12,2,4400.652439  
12,2,12535.500000  
12,2,1569.843023

12,2,3130.832599  
12,2,1778.193878  
12,2,2293.435897  
12,2,2547.029412  
12,2,14722.432292  
12,2,8261.582386  
12,2,3817.526163  
12,2,1529.365385  
12,2,9555.519231  
12,2,3372.168478  
12,2,3156.488095  
12,2,2873.391026  
12,2,1584.832143  
12,2,2626.959091  
12,2,10148.000000  
12,2,2155.500000  
12,2,2365.979651  
12,2,1676.596939  
12,2,2705.000000  
12,2,4678.125000  
12,2,2596.763021  
12,2,2679.861111  
12,2,3952.760204  
12,2,10734.573171  
12,2,3898.850267  
12,2,3218.544118  
12,2,14555.018868  
12,2,1598.595745  
12,2,2404.164865  
12,2,4434.703704  
12,2,3671.167614  
12,2,5281.571429  
12,2,2225.522222  
12,2,2691.053571  
12,2,3618.630952  
12,2,2684.641304  
12,2,6503.886364  
12,2,2512.814286  
12,2,5083.300847  
12,2,1901.410714  
12,2,1703.090116  
12,2,2213.872500  
12,2,1624.636364  
12,2,5328.007812  
12,2,2899.000000  
12,2,4539.268519  
12,2,5194.207317  
12,2,2914.010000  
12,2,3653.127551  
12,2,5323.878378  
12,2,4780.150000  
12,2,5335.625000  
12,2,3858.350000  
12,2,8373.436364  
12,2,2268.800000  
12,2,1785.767857  
12,2,2372.981132  
12,2,1706.774390  
12,2,1929.112903  
12,2,1514.322368  
12,2,2681.336957  
12,2,5209.850000  
12,2,16063.073171  
12,2,2801.262821  
12,2,2637.135593  
12,2,7287.991667

12,2,8422.669643  
12,2,2016.560000  
12,2,3586.763514  
12,2,1552.400568  
12,2,8348.851351  
12,2,1769.194767  
12,2,3186.195652  
12,2,3188.272059  
12,2,37012.562500  
12,2,3605.860465  
12,2,2650.797872  
12,2,2811.590116  
12,2,1918.173913  
12,2,2772.517500  
12,2,2036.375000  
12,2,5582.579268  
12,2,1501.862179  
12,2,2293.190000  
12,2,13577.541667  
12,2,2329.956522  
12,2,4585.297170  
12,2,1831.291667  
12,2,2296.861446  
12,2,1563.300000  
12,2,3647.118590  
12,2,4134.744318  
12,2,3533.695312  
12,2,1964.030612  
12,2,4154.130682  
12,2,6158.629717  
12,2,4771.750000  
12,2,5869.100000  
12,2,2576.666667  
12,2,2362.636364  
12,2,2580.573171  
12,2,1753.797794  
12,2,17121.433824  
12,2,2145.061224  
12,2,3953.294118  
12,2,5413.827500  
12,2,3255.730769  
12,2,2965.281250  
12,2,1673.708333  
12,2,13668.220930  
12,2,4071.625000  
12,2,2700.312500  
12,2,2562.678977  
12,2,2080.760870  
12,2,2102.776042  
12,2,3301.776596  
12,2,1651.925000  
12,2,12944.359694  
12,2,2279.468750  
12,2,7688.661017  
12,2,4861.797753  
12,2,5273.155172  
12,2,1699.831395  
12,2,2493.947368  
12,2,2338.567568  
12,2,2369.101562  
12,2,2695.750000  
12,2,3464.552778  
12,2,4615.026786  
12,2,12424.195122  
12,2,6646.125000  
12,2,8700.312500

12,2,1504.479167  
12,2,2449.278846  
12,2,4291.140625  
12,2,2749.535484  
12,2,2210.139535  
12,2,6824.390135  
12,2,2599.210526  
12,2,7082.632653  
12,2,1616.715000  
12,2,2050.377551  
12,2,3487.365854  
12,2,1709.232143  
12,2,1961.027027  
12,2,2935.102273  
12,2,2348.372727  
12,2,5035.676829  
12,2,2376.514706  
12,2,2127.487179  
12,2,2665.175000  
12,2,1729.209375  
12,2,2465.318627  
12,2,3287.250000  
12,2,2754.525510  
12,2,4060.255952  
12,2,2442.467593  
12,2,2368.516667  
12,2,3521.750000  
12,2,1621.990385  
12,2,7469.858696  
12,2,1701.426136  
12,2,5852.781250  
13,1,5039.279070  
13,1,103548.700000  
13,1,54748.333333  
13,1,39161.575658  
13,1,1588.909091  
13,1,55226.363636  
13,1,70775.168605  
13,1,1774.982955  
13,1,15505.223684  
13,1,1898.946809  
13,1,4106.942568  
13,1,26164.916667  
13,1,28490.669118  
13,1,1509.336806  
13,1,1527.993056  
13,1,37034.347222  
13,1,2211.952381  
13,1,13831.307692  
13,1,53876.747093  
13,1,1773.206250  
13,1,2532.300000  
13,1,1668.776596  
13,1,48266.926471  
13,1,1596.032500  
13,1,6971.570513  
13,1,30054.666667  
13,1,17596.791667  
13,1,2008.292683  
13,1,1764.904762  
13,1,151005.977273  
13,1,6029.040698  
13,1,14919.187500  
13,1,56375.079268  
13,1,3975.824405  
13,1,93109.732639

13,1,1993.350000  
13,1,142341.346591  
13,1,9660.568548  
13,1,1736.105978  
13,1,3376.437500  
13,1,2292.625000  
13,1,114839.465116  
13,1,10781.701923  
13,1,54181.404255  
13,1,6244.647059  
13,1,12893.333333  
13,1,1799.947674  
13,1,1510.275000  
13,1,1883.093750  
13,1,1671.426282  
13,1,3023.964623  
13,1,4916.111111  
13,1,33761.181818  
13,1,2321.331395  
13,1,31540.390625  
13,1,1630.580556  
13,1,1684.142857  
13,1,1901.243902  
13,1,84221.729730  
13,1,1701.345930  
13,1,1555.134375  
13,1,1965.472222  
13,1,73997.933333  
13,1,76302.786585  
13,1,75392.202703  
13,1,4464.696809  
13,1,19717.046875  
13,1,10841.576923  
13,1,64571.866071  
13,1,4883.813953  
13,1,1887.288889  
13,1,1739.461957  
13,1,48452.777027  
13,1,1819.625000  
13,1,93555.768293  
13,1,3998.409722  
13,1,5453.625000  
13,1,5582.380435  
13,1,10490.810976  
13,1,4000.879808  
13,1,1802.212121  
13,1,8305.668478  
13,1,96213.065789  
13,1,1513.331081  
13,1,4377.574324  
13,1,1554.846939  
13,1,26980.697674  
13,1,96853.642442  
13,1,21183.161585  
13,1,111487.891026  
13,1,5941.686170  
13,1,31385.189189  
13,1,9024.392857  
13,1,2150.803571  
13,1,2087.457317  
13,1,1705.233553  
13,1,3089.583333  
13,1,2221.858553  
13,1,1541.828125  
13,1,1647.025510  
13,1,4238.150000

13,1,23518.411765  
13,1,12184.902439  
13,1,1695.991071  
13,1,105468.756944  
13,1,21935.847222  
13,1,3673.666667  
13,1,112497.369318  
13,1,2122.412500  
13,1,4018.400641  
13,1,8982.595588  
13,1,47564.100000  
13,1,88889.921053  
13,1,4421.361111  
13,1,64848.243421  
13,1,3933.062500  
13,1,4040.741071  
13,1,37161.093750  
13,1,5370.354730  
13,1,1753.459459  
13,1,5190.613636  
13,1,5366.535714  
13,1,1676.714286  
13,1,77445.282051  
13,1,1860.606250  
13,1,11324.156250  
13,1,71890.365385  
13,1,1537.065625  
13,1,2411.378205  
13,1,69188.092105  
13,1,2151.148936  
13,1,3109.750000  
13,1,1834.272059  
13,1,5412.469388  
13,1,2110.687500  
13,1,184536.631285  
13,1,45755.871429  
13,1,59611.904412  
13,1,1619.885417  
13,1,7035.886628  
13,1,2326.546053  
13,1,2259.634146  
13,1,20700.618421  
13,1,62427.269531  
13,1,1682.843750  
13,1,2710.565789  
13,1,19972.317935  
13,1,29701.000000  
13,1,4606.200000  
13,1,141896.685976  
13,1,63585.400568  
13,1,16040.787234  
13,1,1550.625000  
13,1,4155.416667  
13,1,2679.195122  
13,1,39937.182692  
13,1,2373.687500  
13,1,1733.667763  
13,1,2192.184211  
13,1,1667.148936  
13,1,151450.381579  
13,1,1587.678571  
13,1,3102.047619  
13,1,6430.773810  
13,1,71386.000000  
13,1,6509.153846  
13,1,4023.507812

13,1,11111.510870  
13,1,27137.978261  
13,1,1837.115385  
13,1,4048.655612  
13,1,166765.424419  
13,1,1906.000000  
13,1,1868.044271  
13,1,34940.532051  
13,1,3670.784091  
13,1,72689.013514  
13,1,3695.286932  
13,1,46962.690789  
13,1,1876.615385  
13,1,2917.257143  
13,1,34294.613636  
13,1,1626.857143  
13,1,2114.677778  
13,1,79685.769886  
13,1,1713.780405  
13,1,3093.851064  
13,1,7689.744898  
13,1,46961.802083  
13,1,2739.489362  
13,1,24080.750000  
13,1,31541.853261  
13,1,2491.677778  
13,1,3602.000000  
13,1,53303.710526  
13,1,44792.062500  
13,1,39998.507353  
13,1,2395.890625  
13,1,1515.615385  
13,1,1533.122159  
13,1,46289.414286  
13,1,10137.593750  
13,1,1935.423469  
13,1,11057.734756  
13,1,55074.617857  
13,1,167611.130952  
13,1,1892.813953  
13,1,1585.039894  
13,1,1761.361413  
13,1,8092.366667  
13,1,1559.250000  
13,1,3601.053571  
13,1,1630.466463  
13,1,4436.878205  
13,1,5651.518868  
13,1,70810.513514  
13,1,16699.862500  
13,1,2274.807692  
13,1,21342.187500  
13,1,24826.631579  
13,1,3915.866279  
13,1,55372.719697  
13,1,8217.035714  
13,1,3922.250000  
13,1,2194.987179  
13,1,1800.542553  
13,1,2511.492188  
13,1,1581.213415  
13,1,5130.488372  
13,1,1617.062500  
13,1,2060.993902  
13,1,2948.195122  
13,1,47250.360465

13,1,6919.796053  
13,1,5830.721154  
13,1,100347.767857  
13,1,18889.222826  
13,1,2558.589674  
13,1,3941.893293  
13,1,40427.680921  
13,1,1899.092391  
13,1,41682.210714  
13,1,1594.714286  
13,1,43444.542969  
13,1,103476.560976  
13,1,20216.070312  
13,1,1913.423077  
13,1,12281.488636  
13,1,11971.898649  
13,1,1584.319767  
13,1,10934.180851  
13,1,44855.057143  
13,1,2065.000000  
13,1,1876.790541  
13,1,4787.520833  
13,1,1732.445513  
13,1,1747.381250  
13,1,2121.943182  
13,1,4785.095588  
13,1,3531.583333  
13,1,46654.179054  
13,1,1529.666667  
13,1,65399.192308  
13,1,1914.430233  
13,1,2536.684375  
13,1,110475.607143  
13,1,1569.567073  
13,1,6062.134375  
13,1,24970.257576  
13,1,50160.780488  
13,1,5899.056250  
13,1,9074.190476  
13,1,3440.301471  
13,1,1576.613636  
13,1,4590.904255  
13,1,62830.799242  
13,1,44276.764706  
13,1,6091.395833  
13,1,47435.901163  
13,1,71088.941176  
13,1,1596.867925  
13,1,31479.404412  
13,1,22016.912162  
13,1,171225.529891  
13,1,98042.584302  
13,1,3237.108696  
13,1,8108.071023  
13,1,1923.678125  
13,1,3077.125000  
13,1,4018.968750  
13,1,1961.244318  
13,1,24901.508929  
13,1,2668.607143  
13,1,1686.452206  
13,1,49558.827206  
13,1,3757.460366  
13,1,1612.375000  
13,1,79995.528409  
13,1,3046.845745

13,1,56960.407143  
13,1,5987.731383  
13,1,1642.175532  
13,1,32903.862903  
13,1,1547.683333  
13,1,37630.602941  
13,1,2072.684524  
13,1,1978.971591  
13,1,41272.800000  
13,1,25994.514706  
13,1,2141.695946  
13,1,4340.790625  
13,1,1570.435897  
13,1,4365.851190  
13,1,17236.736702  
13,1,5159.267857  
13,1,4007.369565  
13,1,4618.704268  
13,1,3044.018293  
13,1,2146.025000  
13,1,103460.553030  
13,1,171801.681818  
13,1,1510.819767  
13,1,1596.139535  
13,1,13317.270833  
13,1,2830.820000  
13,1,1866.980114  
13,1,1509.358696  
13,1,1586.602273  
13,1,1955.650000  
13,1,2295.840426  
13,1,1592.635417  
13,1,4606.168750  
13,1,6310.944444  
13,1,14900.000000  
13,1,1672.345588  
13,1,3559.581395  
13,1,1836.139706  
13,1,1537.880435  
13,1,56757.035156  
13,1,1874.839286  
13,1,1585.115854  
13,1,14119.382813  
13,1,2698.987500  
13,1,3410.903846  
13,1,2060.378125  
13,1,19359.346939  
13,1,1591.117647  
13,1,25623.187500  
13,1,1739.894022  
13,1,64632.226351  
13,1,43620.621795  
13,1,5835.888158  
13,1,3062.812500  
13,1,36521.384615  
13,1,1688.775000  
13,1,5668.300000  
13,1,5361.434783  
13,1,1722.106707  
13,1,2733.245000  
13,1,2836.283654  
13,1,39128.690789  
13,1,3468.986702  
13,1,1857.511111  
13,1,32045.850000  
13,1,59872.600000

13,1,7140.613636  
13,1,52232.500000  
13,1,2405.647500  
13,1,1847.978723  
13,1,2066.984043  
13,1,5214.031250  
13,1,142526.133929  
13,1,4036.500000  
13,1,7677.144886  
13,1,190571.867021  
13,1,1700.038690  
13,1,1637.538462  
13,1,166993.196809  
13,1,109431.005814  
13,1,103824.085366  
13,1,4555.676471  
13,1,40818.696970  
13,1,3315.755952  
13,1,1786.757143  
13,1,2685.730769  
13,1,2766.283088  
13,1,1964.283784  
13,1,42679.932432  
13,1,4566.702128  
13,1,8811.578488  
13,1,54696.671053  
13,1,79410.823718  
13,1,12117.236413  
13,1,2901.403846  
13,1,38548.375000  
13,1,2456.345930  
13,1,1502.178571  
13,1,1664.405405  
13,1,2148.489286  
13,1,3509.450000  
13,1,1897.440000  
13,1,13720.032258  
13,1,69858.518750  
13,1,1917.079787  
13,1,96603.782051  
13,1,2907.190058  
13,1,76673.472826  
13,1,2147.025000  
13,1,1826.000000  
13,1,5526.647436  
13,1,22613.856061  
13,1,26076.835366  
13,1,1861.931250  
13,1,18592.011628  
13,1,45257.769231  
13,1,2294.875000  
13,1,9495.266304  
13,1,2297.776316  
13,1,47638.964286  
13,1,3908.035714  
13,1,2654.421053  
13,1,3623.955128  
13,1,3466.162791  
13,1,1951.157895  
13,1,1578.329545  
13,1,3477.811111  
13,1,2752.140625  
13,1,49071.234756  
13,1,3101.846154  
13,1,1768.321429  
13,1,29941.460526

13,1,1584.180851  
13,1,1748.732759  
13,1,1562.240385  
13,1,2145.602941  
13,1,8916.232143  
13,1,2461.003289  
13,1,1637.741935  
13,1,107139.000000  
13,1,1702.307692  
13,1,19340.820513  
13,1,4882.176471  
13,1,25891.679878  
13,1,2063.707317  
13,1,14432.250000  
13,1,20570.562500  
13,1,40002.000000  
13,1,133918.515244  
13,1,113394.420732  
13,1,4522.871795  
13,1,2613.030612  
13,1,1623.222222  
13,1,20353.242857  
13,1,1779.213415  
13,1,44302.166667  
13,1,29429.593750  
13,1,15455.846154  
13,1,28201.375000  
13,1,1651.428571  
13,1,1890.952128  
13,1,15615.744681  
13,1,11749.404255  
13,1,4563.250000  
13,1,162803.678571  
13,1,12613.890625  
13,1,57609.432432  
13,1,1626.227941  
13,1,91905.350000  
13,1,2794.800000  
13,1,6293.250000  
13,1,4454.895833  
13,1,11589.214286  
13,1,66815.184783  
13,1,40266.166667  
13,1,1890.903409  
13,1,3581.810976  
13,1,19750.439189  
13,1,2901.554878  
13,1,4227.395833  
13,1,1832.853659  
13,1,126382.026316  
13,1,4700.345238  
13,1,2440.690909  
13,1,1708.634615  
13,1,1546.803571  
13,1,2945.836735  
13,1,1558.741477  
13,1,37112.272727  
13,1,2269.239362  
13,1,54095.700000  
13,1,10816.980469  
13,1,2296.418605  
13,1,46081.593750  
13,1,16809.238889  
13,1,2809.000000  
13,1,2408.199324  
13,1,2776.083333

13,1,10475.654412  
13,1,1784.154891  
13,1,147554.557065  
13,1,2031.984375  
13,1,114602.000000  
13,1,1868.279412  
13,1,1931.060606  
13,1,2903.746711  
13,1,78134.253472  
13,1,1797.095745  
13,1,2342.690476  
13,1,1642.392045  
13,1,2971.907738  
13,1,1847.825581  
13,1,2298.854167  
13,1,4088.195946  
13,1,43181.327586  
13,1,74314.112500  
13,1,7116.355556  
13,1,179139.300000  
13,1,72349.609756  
13,1,11165.989583  
13,1,3265.752976  
13,1,33583.718750  
13,1,59421.736842  
13,1,2090.578125  
13,1,93337.520270  
13,1,2068.652439  
13,1,5505.601064  
13,1,5568.284091  
13,1,1875.412791  
13,1,72617.062500  
13,1,36267.682692  
13,1,151269.930921  
13,1,6941.294872  
13,1,56982.743902  
13,1,10465.728448  
13,1,92588.959375  
13,1,8209.125000  
13,1,125558.572368  
13,1,29357.750000  
13,1,35676.446429  
13,1,4689.107558  
13,1,20948.464286  
13,1,1598.298780  
13,1,2842.700000  
13,1,128218.653846  
13,1,119786.330556  
13,1,2390.733696  
13,1,2200.725000  
13,1,3171.388889  
13,1,3022.000000  
13,1,44892.852941  
13,1,4184.651316  
13,1,1652.247549  
13,1,112660.539474  
13,1,32661.243243  
13,1,7802.187500  
13,1,2460.483696  
13,1,2046.000000  
13,1,1937.318182  
13,1,2633.576923  
13,1,116160.700000  
13,1,38588.218750  
13,1,2475.377451  
13,1,20067.500000

13,1,6106.687500  
13,1,51798.829268  
13,1,1503.812500  
13,1,9261.708333  
13,1,9325.138889  
13,1,1669.925676  
13,1,43636.704545  
13,1,1859.544271  
13,1,1955.568878  
13,1,59250.297297  
13,1,29260.151163  
13,1,8161.551724  
13,1,1646.331395  
13,1,3453.944444  
13,1,2145.468085  
13,1,1893.490625  
13,1,2158.073864  
13,1,1727.919643  
13,1,3963.144231  
13,1,13836.533333  
13,1,42134.714286  
13,1,1953.319149  
13,1,1794.714286  
13,1,2041.464286  
13,1,1845.179878  
13,1,2284.941176  
13,1,2913.159091  
13,1,5616.333333  
13,1,83684.142157  
13,1,2523.984375  
13,1,11227.443182  
13,1,4457.734914  
13,1,2109.069149  
13,1,94388.825000  
13,1,1548.744186  
13,1,30245.189189  
13,1,5255.200000  
13,1,1989.658537  
13,1,14112.906250  
13,1,2360.829545  
13,1,2432.064103  
13,1,78675.707143  
13,1,3272.595745  
13,1,9807.585000  
13,1,2695.133929  
13,1,36200.690789  
13,1,5081.054688  
13,1,1878.555556  
13,1,1880.333333  
13,1,12972.631818  
13,1,30061.266667  
13,1,1643.046512  
13,1,4604.952778  
13,1,1636.402439  
13,1,2089.886029  
13,1,53450.524457  
13,1,42865.682927  
13,1,2010.927273  
13,1,2345.819444  
13,1,4941.256410  
13,1,1586.881250  
13,1,2531.552632  
13,1,51619.959559  
13,1,19273.850000  
13,1,1736.518293  
13,1,10865.928571

13,1,40957.204268  
13,1,2727.121429  
13,1,1745.219828  
13,1,1620.949324  
13,1,82652.369565  
13,1,4612.578947  
13,1,1516.443548  
13,1,32825.837838  
13,1,47519.666667  
13,1,4407.244565  
13,1,10914.276316  
13,1,1767.987179  
13,1,53929.761905  
13,1,40090.383333  
13,1,50223.926471  
13,1,6337.676020  
13,1,18409.208333  
13,1,14991.777778  
13,1,51051.181818  
13,1,56559.644737  
13,1,3200.091216  
13,1,10814.040541  
13,1,2468.277174  
13,1,31542.875000  
13,1,2818.242857  
13,1,1820.014286  
13,1,171812.264423  
13,1,28500.538462  
13,1,22733.920000  
13,1,10241.031250  
13,1,6321.217949  
13,1,1636.460227  
13,1,1972.153846  
13,1,4191.862069  
13,1,2442.129032  
13,1,1932.201220  
13,1,3284.886364  
13,1,3063.063830  
13,1,4591.154255  
13,1,2354.531915  
13,1,2591.677632  
13,1,5414.703125  
13,1,7966.786585  
13,1,5913.507353  
13,1,2012.756098  
13,1,3498.230114  
13,1,2369.916667  
13,1,2136.635870  
13,1,100336.779412  
13,1,2863.812500  
13,1,2714.000000  
13,1,1651.040698  
13,1,1845.371951  
13,1,38726.816327  
13,1,155050.294118  
13,1,3658.326923  
13,1,1813.013514  
13,1,9337.785714  
13,1,6724.298913  
13,1,5535.526316  
13,1,6186.701087  
13,1,36838.250000  
13,1,55060.352941  
13,1,37528.852941  
13,1,6613.858491  
13,1,2523.000000

13,1,27307.148649  
13,1,2611.357143  
13,1,73889.021429  
13,1,8298.038043  
13,1,65209.240625  
13,1,2014.938953  
13,1,1640.503049  
13,1,6191.440625  
13,1,12050.162791  
13,1,2069.085714  
13,1,40071.357143  
13,1,1958.142857  
13,1,19926.132075  
13,1,2852.946429  
13,1,2822.109375  
13,1,78550.255000  
13,1,1630.732143  
13,1,2614.678030  
13,1,35917.958333  
13,1,1528.615854  
13,1,57602.424419  
13,1,124771.791667  
13,1,67750.270833  
13,1,1870.363636  
13,1,1644.439024  
13,1,10888.656250  
13,1,51028.076923  
13,1,2305.811111  
13,1,2859.098214  
13,1,1877.196429  
13,1,1572.468085  
13,1,3025.465909  
13,1,2759.937500  
13,1,1526.476064  
13,1,100198.928571  
13,1,2295.456395  
13,1,113164.892857  
13,1,3212.625000  
13,1,6979.878378  
13,1,1873.676471  
13,1,148841.252500  
13,1,42291.656250  
13,1,1684.358974  
13,1,7472.541667  
13,1,3868.961538  
13,1,2400.488095  
13,1,53567.125000  
13,1,80890.984375  
13,1,15402.713235  
13,1,2586.500000  
13,1,9696.476064  
13,1,4907.428571  
13,1,52976.102041  
13,1,125796.980556  
13,1,10379.976190  
13,1,1805.533333  
13,1,2127.664773  
13,1,2022.062500  
13,1,74154.391447  
13,1,1760.295918  
13,1,86284.714286  
13,1,1583.860119  
13,1,135336.093750  
13,1,35995.185484  
13,1,1792.559091  
13,1,5295.941176

13,1,1958.303191  
13,1,3151.668605  
13,1,48908.317935  
13,1,2054.580357  
13,1,49688.529412  
13,1,168039.046584  
13,1,26962.966912  
13,1,80790.250000  
13,1,1644.583333  
13,1,6825.947500  
13,1,4253.555556  
13,1,15958.514706  
13,1,2575.800000  
13,1,5181.076923  
13,1,1654.441860  
13,1,2276.000000  
13,1,1658.986413  
13,1,1839.700000  
13,1,4005.812500  
13,1,52201.655303  
13,1,1591.000000  
13,1,50959.714286  
13,1,2896.758333  
13,1,10812.808333  
13,1,2593.577778  
13,1,5089.270833  
13,1,1925.666667  
13,1,2839.556548  
13,1,9236.000000  
13,1,1953.776316  
13,1,2148.250000  
13,1,2612.669444  
13,1,7702.059524  
13,1,2363.266667  
13,1,8640.090047  
13,1,18775.083333  
13,1,2678.697674  
13,1,1695.418478  
13,1,178053.907407  
13,1,34344.090426  
13,1,40219.590909  
13,1,2926.486486  
13,1,1643.515244  
13,1,127254.585000  
13,1,3095.806250  
13,1,28246.878472  
13,1,34503.617647  
13,1,82591.652027  
13,1,7206.917614  
13,1,22443.660000  
13,1,2611.853659  
13,1,1555.869048  
13,1,1747.500000  
13,1,14236.273438  
13,1,56048.200000  
13,1,58348.824324  
13,1,5068.909091  
13,1,2714.886364  
13,1,1646.144737  
13,1,3047.765625  
13,1,1540.935606  
13,1,2203.176471  
13,1,4482.468750  
13,1,2574.963235  
13,1,3520.798077  
13,1,1642.875000

13,1,12094.000000  
13,1,1586.230769  
13,1,1834.100000  
13,1,114817.394737  
13,1,4072.951220  
13,1,47313.798611  
13,1,3550.404762  
13,1,93392.528302  
13,1,1964.416667  
13,1,3043.877604  
13,1,25240.559748  
13,1,29729.274390  
13,1,69161.552326  
13,1,2155.739362  
13,1,2005.714286  
13,1,4973.989865  
13,1,1721.190476  
13,1,35071.337500  
13,1,64983.888889  
13,1,2793.235294  
13,1,3875.882353  
13,1,5651.896875  
13,1,3415.448529  
13,1,2743.609043  
13,1,25293.532258  
13,1,5408.218750  
13,1,2304.465116  
13,1,47079.121429  
13,1,88195.318750  
13,1,2756.712766  
13,1,45746.132812  
13,1,1780.983333  
13,1,4693.982143  
13,1,4784.000000  
13,1,1775.048913  
13,1,1615.641447  
13,1,3210.882353  
13,1,1515.930233  
13,1,107592.586111  
13,1,1922.687500  
13,1,1887.818182  
13,1,141366.558824  
13,1,6747.875000  
13,1,42070.039062  
13,1,140396.506579  
13,1,2460.891667  
13,1,6217.235294  
13,1,2065.721591  
13,1,4902.977273  
13,1,7422.545732  
13,1,1627.410714  
13,1,10303.985294  
13,1,1924.361111  
13,1,156382.168605  
13,1,7136.000000  
13,1,1791.421053  
13,1,7088.326923  
13,1,2061.928571  
13,1,1649.565789  
13,1,1863.991279  
13,1,1512.094444  
13,1,1993.342105  
13,1,1750.702703  
13,1,50764.333333  
13,1,2626.159091  
13,1,6119.875000

13,1,48222.000000  
13,1,175948.662736  
13,1,2095.259615  
13,1,39331.488372  
13,1,3168.816667  
13,1,3193.051471  
13,1,1516.881098  
13,1,1661.658537  
13,1,1638.360714  
13,1,18862.380952  
13,1,2606.544118  
13,1,46485.284091  
13,1,18462.117647  
13,1,19309.559028  
13,1,1727.513514  
13,1,30825.302500  
13,1,35529.724359  
13,1,5912.287234  
13,1,39716.940972  
13,1,1575.366667  
13,1,1586.100000  
13,1,1606.600000  
13,1,1740.562500  
13,1,121525.157051  
13,1,43877.826389  
13,1,2034.918919  
13,1,1594.031250  
13,1,45476.205882  
13,1,58202.779891  
13,1,10217.613372  
13,1,39271.539474  
13,1,1521.013158  
13,1,4727.756410  
13,1,91372.729730  
13,1,2683.400000  
13,1,103057.505814  
13,1,59691.900000  
13,1,88378.572917  
13,1,21968.982639  
13,1,2199.230556  
13,1,5394.815476  
13,1,18402.943396  
13,1,2498.744186  
13,1,17235.102273  
13,1,6825.730769  
13,1,6864.535714  
13,1,3510.446429  
13,1,1573.922619  
13,1,3069.720588  
13,1,3046.500000  
13,1,54618.158088  
13,1,2962.633929  
13,1,1591.439024  
13,1,2235.711538  
13,1,2285.151786  
13,1,38723.675781  
13,1,24051.625000  
13,1,11324.650735  
13,1,22314.812500  
13,1,2046.176282  
13,1,36246.276442  
13,1,4819.860119  
13,1,1601.162791  
13,1,53334.255319  
13,1,4533.523936  
13,1,7062.883721

13,1,39921.263158  
13,1,8843.973684  
13,1,6131.502500  
13,1,1560.153374  
13,1,52541.179348  
13,1,11386.977273  
13,1,1737.671512  
13,1,2366.500000  
13,1,1708.538462  
13,1,45259.493421  
13,1,14553.768293  
13,1,1515.503125  
13,1,3331.031250  
13,1,6846.485119  
13,1,6429.651786  
13,1,19301.085366  
13,1,2127.969444  
13,1,1692.318182  
13,1,113053.960526  
13,1,3998.000000  
13,1,6305.298780  
13,1,56086.571429  
13,1,4862.117188  
13,1,6149.828947  
13,1,5773.487805  
13,1,16967.470588  
13,1,2315.660000  
13,1,2001.375000  
13,1,2336.787791  
13,1,4178.892857  
13,1,15735.861413  
13,1,3978.250000  
13,1,3835.431250  
13,1,168531.480769  
13,1,6581.627404  
13,1,15175.291667  
13,1,91753.204545  
13,1,23551.800000  
13,1,100085.472973  
13,1,3062.422222  
13,1,6645.964286  
13,1,1556.536585  
13,1,12638.902439  
13,1,6492.700000  
13,1,2086.402439  
13,1,6354.228261  
13,1,1795.227941  
13,1,1978.966463  
13,1,4403.099432  
13,1,1516.262195  
13,1,37278.288462  
13,1,1788.932432  
13,1,1996.528646  
13,1,1605.250000  
13,1,7746.500000  
13,1,1603.442568  
13,1,1793.017500  
13,1,2045.227273  
13,1,3474.232143  
13,1,73353.609848  
13,1,3418.010638  
13,1,2081.957447  
13,1,27934.593750  
13,1,67932.858553  
13,1,1957.552632  
13,1,1530.500000

13,1,65309.510135  
13,1,51701.628378  
13,1,3291.595930  
13,1,5990.550781  
13,1,36609.476351  
13,1,3091.869681  
13,1,78467.510417  
13,1,4093.218023  
13,1,1737.823718  
13,1,1749.875000  
13,1,12860.166667  
13,1,1662.213235  
13,1,2772.142857  
13,1,113029.416667  
13,1,7072.818396  
13,1,55669.040323  
13,1,10449.388889  
13,1,49565.202381  
13,1,3688.380952  
13,1,2681.312500  
13,1,7600.000000  
13,1,1903.261111  
13,1,15530.080357  
13,1,4034.187500  
13,1,15172.125000  
13,1,65686.067568  
13,1,1668.867188  
13,1,11204.147727  
13,1,36049.235294  
13,1,1907.368243  
13,1,69910.229167  
13,1,34485.250000  
13,1,144167.848837  
13,1,2496.951087  
13,1,2092.000000  
13,1,12216.076923  
13,1,16133.317073  
13,1,3096.487179  
13,1,6181.431250  
13,1,1821.750000  
13,1,1594.181818  
13,1,1651.192708  
13,1,4175.705729  
13,1,2281.000000  
13,1,18578.085938  
13,1,19324.625000  
13,1,78101.771341  
13,1,1924.145833  
13,1,19531.317073  
13,1,17975.722222  
13,1,1556.125000  
13,1,1519.625000  
13,1,4888.137500  
13,1,2106.562500  
13,1,4283.750000  
13,1,2932.304348  
13,1,13857.230000  
13,1,1666.850000  
13,1,101011.500000  
13,1,55438.218750  
13,1,1762.989130  
13,1,3416.432692  
13,1,103972.410256  
13,1,4514.983696  
13,1,1764.833333  
13,1,4265.483871

13,1,2135.554878  
13,1,2705.594595  
13,1,3233.394231  
13,1,1645.635135  
13,1,3253.207237  
13,1,2744.634615  
13,1,45281.000000  
13,1,51882.761029  
13,1,7506.934783  
13,1,2656.687500  
13,1,1689.185811  
13,1,6719.866667  
13,1,6451.754717  
13,1,2162.993750  
13,1,1545.411765  
13,1,2208.308824  
13,1,19777.566489  
13,1,68583.080645  
13,1,37784.840625  
13,1,1581.297619  
13,1,44372.968750  
13,1,133133.168478  
13,1,5321.161765  
13,1,6302.062500  
13,1,1667.750000  
13,1,9709.186047  
13,1,3000.743902  
13,1,2627.102941  
13,1,8983.243590  
13,1,20424.000000  
13,1,28043.535156  
13,1,2648.613636  
13,1,8314.574324  
13,1,1614.794643  
13,1,98223.200658  
13,1,4701.500000  
13,1,5031.051136  
13,1,3094.071429  
13,1,2378.446429  
13,1,22678.700000  
13,1,3037.690476  
13,1,2508.425000  
13,1,62941.155488  
13,1,118676.880952  
13,1,2725.142442  
13,1,30247.171875  
13,1,3712.040323  
13,1,1601.278571  
13,1,1563.691176  
13,1,147910.468750  
13,1,3053.358696  
13,1,1595.837838  
13,1,20031.993750  
13,1,1595.625000  
13,1,1932.205882  
13,1,83229.491667  
13,1,14008.224432  
13,1,5064.035714  
13,1,5815.003676  
13,1,49076.427632  
13,1,9525.416667  
13,1,83871.491071  
13,1,145640.819149  
13,1,10457.666667  
13,1,2184.973404  
13,1,4018.718085

13,1,6271.112500  
13,1,2068.982143  
13,1,31445.054054  
13,1,1922.461957  
13,1,39051.185811  
13,1,34380.743421  
13,1,91114.201389  
13,1,62137.181818  
13,1,5457.310976  
13,1,60028.817568  
13,1,54773.951613  
13,1,2351.750000  
13,1,5359.157143  
13,1,8311.737805  
13,1,19483.164634  
13,1,74573.211806  
13,1,50789.328571  
13,1,1631.503030  
13,1,2300.139535  
13,1,3048.358333  
13,1,54456.746528  
13,1,39172.795455  
13,1,36998.750000  
13,1,2097.746212  
13,1,1499.655556  
13,1,1707.418478  
13,1,121151.878125  
13,1,77178.182692  
13,1,2317.425595  
13,1,1534.225610  
13,1,2053.648649  
13,1,1963.356618  
13,1,4077.532738  
13,1,52578.957143  
13,1,3241.812500  
13,1,58274.709184  
13,1,13865.418605  
13,1,118674.340426  
13,1,3794.593085  
13,1,62067.799020  
13,1,2499.195652  
13,1,13019.785714  
13,1,2113.151961  
13,1,47175.477273  
13,1,6557.000000  
13,1,2327.222222  
13,1,50529.310897  
13,1,6271.790625  
13,1,97609.487805  
13,1,4824.170732  
13,1,159131.076923  
13,1,2034.842949  
13,1,3677.878472  
13,1,84280.000000  
13,1,45329.083333  
13,1,4530.885135  
13,1,2964.825000  
13,1,1686.974359  
13,1,3257.200000  
13,1,83249.712766  
13,1,2724.901163  
13,1,15362.597826  
13,1,1516.209459  
13,1,3324.238806  
13,1,10296.493590  
13,1,1824.636792

13,1,1863.744792  
13,1,7516.445122  
13,1,60007.622222  
13,1,6314.203125  
13,1,7726.952381  
13,1,1639.631579  
13,1,3225.450000  
13,1,1540.066667  
13,1,68213.461538  
13,1,41785.886029  
13,1,2448.875000  
13,1,2528.184783  
13,1,2360.706395  
13,1,2671.548913  
13,1,51992.282609  
13,1,36360.935484  
13,1,6153.842105  
13,1,54763.000000  
13,1,3252.250000  
13,1,54308.406250  
13,1,1671.881579  
13,1,95470.000000  
13,1,9398.225000  
13,1,1825.904070  
13,1,3483.595745  
13,1,3148.505814  
13,1,3741.632653  
13,1,1629.569444  
13,1,2547.254902  
13,1,2197.793269  
13,1,41730.993421  
13,1,3934.975543  
13,1,149236.122642  
13,1,2128.203125  
13,1,1849.924342  
13,1,3316.202206  
13,1,1648.375000  
13,1,55544.996429  
13,1,1712.331081  
13,1,2625.319149  
13,1,9405.711538  
13,1,4951.664062  
13,1,72243.483108  
13,1,1677.972826  
13,1,5003.428571  
13,1,3571.066038  
13,1,69918.423077  
13,1,1785.634146  
13,1,1581.366071  
13,1,78054.872340  
13,1,1713.263514  
13,1,2881.988281  
13,1,7117.020833  
13,1,2121.239583  
13,1,3168.291667  
13,1,5315.157895  
13,1,89453.562500  
13,1,1975.521277  
13,1,160910.452381  
13,1,1506.000000  
13,1,5880.270833  
13,1,3883.195455  
13,1,2304.750000  
13,1,1505.904762  
13,1,2078.843750  
13,1,153763.630435

13,1,2089.833333  
13,1,1575.601744  
13,1,1556.022222  
13,1,5301.767857  
13,1,1828.682065  
13,1,3709.093750  
13,1,2434.223214  
13,1,5318.023810  
13,1,2009.587209  
13,1,2075.462500  
13,1,6066.250000  
13,1,1660.133929  
13,1,80363.648026  
13,1,166446.326087  
13,1,11656.736413  
13,1,17532.314189  
13,1,8732.591667  
13,1,28763.302083  
13,1,8255.300000  
13,1,3249.038690  
13,1,15987.529891  
13,1,1791.020833  
13,1,58984.444444  
13,1,85648.537791  
13,1,104342.526596  
13,1,152049.139423  
13,1,1642.181818  
13,1,2248.622093  
13,1,143513.820122  
13,1,9636.510870  
13,1,29258.632143  
13,1,6330.172222  
13,1,133130.464286  
13,1,107730.828488  
13,1,7709.250000  
13,1,1589.463415  
13,1,2196.652174  
13,1,2297.709302  
13,1,12682.083333  
13,1,21931.525568  
13,1,1629.107143  
13,1,1854.502778  
13,1,46926.591837  
13,1,3677.722561  
13,1,5157.371951  
13,1,22242.677419  
13,1,3035.277027  
13,1,4894.625000  
13,1,2271.097561  
13,1,76473.157143  
13,1,8671.297619  
13,1,5508.881944  
13,1,39229.933594  
13,1,1720.645349  
13,1,2215.341667  
13,1,56577.608108  
13,1,2333.928571  
13,1,2700.106707  
13,1,1810.797619  
13,1,1778.482955  
13,1,2456.062500  
13,1,1877.763158  
13,1,10323.466667  
13,1,2281.829545  
13,1,3844.673913  
13,1,2075.900000

13,1,37927.986486  
13,1,3149.800000  
13,1,45539.867647  
13,1,1690.365854  
13,1,1556.949468  
13,1,12326.652174  
13,1,47808.500000  
13,1,2436.506944  
13,1,3894.857143  
13,1,75349.765957  
13,1,2018.843750  
13,1,18956.653571  
13,1,190943.203125  
13,1,1768.298780  
13,1,4638.367021  
13,1,4517.384146  
13,1,14338.604167  
13,1,2948.058594  
13,1,3699.616848  
13,1,1629.026316  
13,1,1748.333333  
13,1,1524.369048  
13,1,57376.980000  
13,1,2036.206522  
13,1,37412.647059  
13,1,1751.264706  
13,1,33696.160156  
13,1,30678.425000  
13,1,2440.023437  
13,1,1803.109756  
13,1,14911.738095  
13,1,1569.834239  
13,1,3387.434211  
13,1,16692.191667  
13,1,4458.410714  
13,1,2789.035714  
13,1,33134.646277  
13,1,19415.980263  
13,1,45103.101852  
13,1,1864.987805  
13,1,62534.270270  
13,1,136720.969388  
13,1,1999.282738  
13,1,7646.765625  
13,1,16264.359375  
13,1,31760.729730  
13,1,5721.312500  
13,1,155590.611111  
13,1,93351.552500  
13,1,4152.570122  
13,1,2591.806548  
13,1,1731.250000  
13,1,7188.744048  
13,1,20059.200000  
13,1,42470.416667  
13,1,2075.439189  
13,1,2902.483173  
13,1,2758.558511  
13,1,9857.122093  
13,1,11994.723485  
13,1,1635.630952  
13,1,2269.526316  
13,1,2228.223404  
13,1,16791.944853  
13,1,1593.496622  
13,1,1579.489130

13,1,8309.643939  
13,1,13927.138298  
13,1,1724.044872  
13,1,97796.845238  
13,1,2571.780488  
13,1,27570.511364  
13,1,32430.906250  
13,1,15775.155405  
13,1,2882.207317  
13,1,1996.243243  
13,1,69266.868421  
13,1,134125.943452  
13,1,5599.076613  
13,1,97932.743902  
13,1,66485.009868  
13,1,3649.125000  
13,1,3731.170213  
13,1,7644.136111  
13,1,166142.774194  
13,1,3943.863636  
13,1,46150.164062  
13,1,2251.567568  
13,1,11263.246094  
13,1,7069.168919  
13,1,2748.750000  
13,1,7474.240000  
13,1,96491.406250  
13,1,2787.608108  
13,1,1503.636364  
13,1,10087.138158  
13,1,27812.129032  
13,1,1688.000000  
13,1,134122.533333  
13,1,61341.323529  
13,1,6492.837838  
13,1,2053.962500  
13,1,3060.288690  
13,1,66355.500000  
13,1,39350.666667  
13,1,122924.536585  
13,1,10968.718085  
13,1,117920.090000  
13,1,31480.000000  
13,1,1559.500000  
13,1,5911.712500  
13,1,6850.461310  
13,1,1729.234694  
13,1,2917.366279  
13,1,1860.500000  
13,1,56062.771429  
13,1,1550.791667  
13,1,23088.118421  
13,1,136776.250000  
13,1,73656.184211  
13,1,2105.147059  
13,1,1597.986111  
13,1,2417.852564  
13,1,2995.333333  
13,1,1734.710366  
13,1,1809.994898  
13,1,5337.963415  
13,1,2781.678571  
13,1,1943.393617  
13,1,1932.399390  
13,1,1857.875000  
13,1,81452.000000

13,1,7593.890957  
13,1,2389.526316  
13,1,35962.220588  
13,1,2229.559028  
13,1,61976.022727  
13,1,84807.125000  
13,1,1752.281250  
13,1,33151.604651  
13,1,28550.375000  
13,1,3763.627907  
13,1,4156.025000  
13,1,1684.118750  
13,1,41971.327703  
13,1,3157.234375  
13,1,41577.496795  
13,1,1712.865385  
13,1,1562.012500  
13,1,30842.818182  
13,1,1895.108696  
13,1,2088.880000  
13,1,38806.014286  
13,1,2163.642857  
13,1,3041.923077  
13,1,7623.752841  
13,1,106574.439024  
13,1,14251.000000  
13,1,50243.176471  
13,1,1669.833333  
13,1,3219.260870  
13,1,2025.122093  
13,1,4489.200000  
13,1,68977.790000  
13,1,46554.275000  
13,1,3175.359756  
13,1,2417.625000  
13,1,142173.713816  
13,1,20398.389286  
13,1,42816.614865  
13,1,33613.687500  
13,1,1588.266304  
13,1,3320.214286  
13,1,155315.000000  
13,1,2856.393750  
13,1,1615.116667  
13,1,1507.412162  
13,1,1515.718023  
13,1,3665.288889  
13,1,88519.468750  
13,1,32851.275000  
13,1,7845.159574  
13,1,3755.000000  
13,1,38765.432143  
13,1,2313.457447  
13,1,3749.040698  
13,1,2580.519444  
13,1,1798.367347  
13,1,2480.346154  
13,1,2363.291667  
13,1,61013.980769  
13,1,13805.358974  
13,1,71178.264423  
13,1,8673.346154  
13,1,15454.889535  
13,1,12687.532051  
13,1,1647.318452  
13,1,6209.282051

13,1,3463.372093  
13,1,1845.073864  
13,1,1942.640625  
13,1,4949.000000  
13,1,5871.699324  
13,1,1627.663462  
13,1,1969.837500  
13,1,11159.747396  
13,1,2220.212500  
13,1,15298.963235  
13,1,3070.176471  
13,1,2363.900000  
13,1,1990.614865  
13,1,2701.616279  
13,1,2978.191667  
13,1,4294.075581  
13,1,1536.031250  
13,1,3106.400000  
13,1,113086.140957  
13,1,6798.444444  
13,1,62530.673611  
13,1,4222.687500  
13,1,18440.583333  
13,1,55022.581081  
13,1,21029.697368  
13,1,18282.564189  
13,1,2315.160714  
13,1,1624.864130  
13,1,8127.631579  
13,1,3052.838542  
13,1,10687.569444  
13,1,121106.711538  
13,1,3383.700000  
13,1,42694.769231  
13,1,5195.800000  
13,1,1668.778571  
13,1,11984.600000  
13,1,54565.020833  
13,1,2868.256250  
13,1,4293.800000  
13,1,74302.834459  
13,1,31390.430000  
13,1,44357.768382  
13,1,2512.717949  
13,1,2012.782738  
13,1,5510.771277  
13,1,2901.136905  
13,1,2422.425532  
13,1,1553.232955  
13,1,1707.658537  
13,1,105195.750000  
13,1,35679.695652  
13,1,17285.604651  
13,1,165896.533333  
13,1,7005.039634  
13,1,7167.953804  
13,1,38281.693750  
13,1,3406.641447  
13,1,1587.630435  
13,1,1646.087121  
13,1,5656.760870  
13,1,2607.276596  
13,1,1512.687500  
13,1,53680.456081  
13,1,1937.848214  
13,1,1968.162500

13,1,5537.152778  
13,1,2504.031250  
13,1,1638.615385  
13,1,1617.156250  
13,1,94351.050000  
13,1,1677.515625  
13,1,2243.062500  
13,1,8190.916667  
13,1,2636.166667  
13,1,2220.562500  
13,1,83804.911765  
13,1,1519.868243  
13,1,13484.288889  
13,1,73831.281250  
13,1,1537.871795  
13,1,1954.583333  
13,1,2243.989583  
13,1,2058.931250  
13,1,4741.731707  
13,1,90501.676471  
13,1,7725.795455  
13,1,33557.833333  
13,1,2961.884375  
13,1,4663.327206  
13,1,86428.526316  
13,1,4404.279070  
13,1,1697.082317  
13,1,33710.102273  
13,1,51063.093750  
13,1,133549.089286  
13,1,1564.989583  
13,1,8784.655556  
13,1,6918.656250  
13,1,3328.982143  
13,1,22093.383721  
13,1,1580.218085  
13,1,3265.521277  
13,1,14253.750000  
13,1,47125.860119  
13,1,1621.478125  
13,1,2824.241935  
13,1,15096.125000  
13,1,3008.104730  
13,1,2181.750000  
13,1,3433.267857  
13,1,2969.967742  
13,1,2048.871795  
13,1,97905.858974  
13,1,1501.973684  
13,1,2777.532738  
13,1,8274.609756  
13,1,3126.389535  
13,1,2337.529412  
13,1,4508.265625  
13,1,2087.437500  
13,1,4310.647059  
13,1,3770.773256  
13,1,4049.317073  
13,1,4479.548295  
13,1,1674.297297  
13,1,17314.204545  
13,1,6047.875000  
13,1,2126.656250  
13,1,1802.217949  
13,1,8949.106061  
13,1,2737.875000

13,1,27676.863636  
13,1,1582.102041  
13,1,4147.088235  
13,1,1840.048780  
13,1,78057.684211  
13,1,24527.397059  
13,1,3876.690000  
13,1,71614.413793  
13,1,2097.414634  
13,1,2250.975610  
13,1,60297.125000  
13,1,3946.625000  
13,1,15913.210526  
13,1,3568.764706  
13,1,3165.361702  
13,1,3204.352564  
13,1,1850.756579  
13,1,2022.253289  
13,1,3370.678571  
13,1,45397.520833  
13,1,6423.105000  
13,1,104222.831081  
13,1,2224.766667  
13,1,8208.239583  
13,1,6404.591346  
13,1,2875.709302  
13,1,185352.220930  
13,1,19372.116071  
13,1,7515.736413  
13,1,7159.812500  
13,1,2557.901316  
13,1,3751.403409  
13,1,12914.500000  
13,1,1619.544872  
13,1,126209.275000  
13,1,3605.026786  
13,1,4012.916667  
13,1,3067.875000  
13,1,2396.636111  
13,1,2064.803571  
13,1,70190.564103  
13,1,1961.083333  
13,1,10862.093023  
13,1,2137.005682  
13,1,42595.528571  
13,1,2028.113208  
13,1,2796.184211  
13,1,2351.205645  
13,1,2923.277439  
13,1,44248.882812  
13,1,2012.537500  
13,1,2120.551471  
13,1,4061.555851  
13,1,94758.619898  
13,1,5916.437500  
13,1,11853.300000  
13,1,2220.569149  
13,1,1545.830882  
13,1,5550.313953  
13,1,139161.613095  
13,1,3704.527778  
13,1,31512.580645  
13,1,54968.750000  
13,1,5085.871622  
13,1,2738.039894  
13,1,1594.672619

13,1,38344.255952  
13,1,1830.818452  
13,1,17165.307692  
13,1,4216.219697  
13,1,1614.547794  
13,1,1648.831325  
13,1,4475.268293  
13,1,96369.767857  
13,1,4063.843750  
13,1,3055.393939  
13,1,2265.409091  
13,1,5396.348837  
13,1,3190.321875  
13,1,65047.082317  
13,1,1507.554348  
13,1,27501.435000  
13,1,2430.255814  
13,1,33817.500000  
13,1,19428.918478  
13,1,2058.535714  
13,1,2534.951705  
13,1,3626.050000  
13,1,22072.026786  
13,1,12552.872222  
13,1,2344.625000  
13,1,40346.094595  
13,1,12736.062500  
13,1,3782.250000  
13,1,136140.859756  
13,1,32490.720745  
13,1,6090.687500  
13,1,5190.685976  
13,1,1565.530488  
13,1,114726.510870  
13,1,7205.057692  
13,1,3192.168605  
13,1,4774.792683  
13,1,29409.255319  
13,1,8005.452381  
13,1,5833.511628  
13,1,2225.473404  
13,1,2290.030488  
13,1,2250.165000  
13,1,113678.035714  
13,1,4323.427778  
13,1,71046.409722  
13,1,2034.250000  
13,1,2025.368421  
13,1,9048.112805  
13,1,14481.744681  
13,1,2013.801282  
13,1,3110.557692  
13,1,58871.000000  
13,1,1875.051020  
13,1,2753.533537  
13,1,6041.820000  
13,1,6016.520833  
13,1,123206.976974  
13,1,39587.250000  
13,1,7262.763514  
13,1,3440.150000  
13,1,1650.656250  
13,1,3024.488372  
13,1,2643.761905  
13,1,1672.662500  
13,1,2475.957447

13,1,33013.664474  
13,1,35582.348485  
13,1,2287.859375  
13,1,2448.709302  
13,1,34339.228125  
13,1,2622.634146  
13,1,25954.695122  
13,1,49114.058824  
13,1,2378.187500  
13,1,5654.009375  
13,1,2674.731250  
13,1,29435.365385  
13,1,4377.295455  
13,1,1740.236111  
13,1,63119.668478  
13,1,8519.657895  
13,1,1538.645455  
13,1,2676.230769  
13,1,2878.181818  
13,1,7193.235714  
13,1,68883.267361  
13,1,7134.808824  
13,1,5004.216912  
13,1,28304.721154  
13,1,1702.253378  
13,1,3063.437500  
13,1,3356.827381  
13,1,92834.666667  
13,1,3427.250000  
13,1,1637.042553  
13,1,2471.232143  
13,1,57672.714286  
13,1,4637.654762  
13,1,4592.914474  
13,1,196978.784091  
13,1,24901.221429  
13,1,1753.739796  
13,1,10712.010638  
13,1,100450.660714  
13,1,1506.910326  
13,1,1884.000000  
13,1,3242.617647  
13,1,3365.094595  
13,1,2849.675000  
13,1,2956.628378  
13,1,2394.177632  
13,1,2432.755814  
13,1,18022.821429  
13,1,5502.769737  
13,1,107338.967105  
13,1,4120.243902  
13,1,3824.115385  
13,1,53030.023438  
13,1,5696.886905  
13,1,23205.219595  
13,1,167131.664634  
13,1,2651.666667  
13,1,7274.984375  
13,1,4283.005952  
13,1,5762.347826  
13,1,7229.625000  
13,1,1778.962838  
13,1,1771.225610  
13,1,1563.428571  
13,1,62750.471875  
13,1,34128.428030

13,1,7802.875000  
13,1,1558.500000  
13,1,2741.693750  
13,1,1809.798913  
13,1,3278.162791  
13,1,11966.500000  
13,1,191375.127976  
13,1,1755.400000  
13,1,11242.704327  
13,1,25800.409091  
13,1,58323.267442  
13,1,2372.207317  
13,1,3494.933333  
13,1,8547.288889  
13,1,7381.950000  
13,1,4149.456522  
13,1,2120.904762  
13,1,9751.406250  
13,1,1814.666667  
13,1,2266.428571  
13,1,12215.468750  
13,1,34136.700658  
13,1,6579.427419  
13,1,2885.743902  
13,1,47880.866279  
13,1,2330.416667  
13,1,9339.923077  
13,1,1844.285714  
13,1,3408.260638  
13,1,76252.907895  
13,1,2485.079545  
13,1,1641.553191  
13,1,2828.486842  
13,1,1795.842857  
13,1,7336.964286  
13,1,8643.882353  
13,1,5367.452128  
13,1,4367.065972  
13,1,162116.463068  
13,1,2054.661585  
13,1,70948.136364  
13,1,1532.587500  
13,1,1809.977654  
13,1,7119.083333  
13,1,64592.854730  
13,1,10932.906250  
13,1,1718.966146  
13,1,1603.081081  
13,1,3321.568627  
13,1,4669.007353  
13,1,1783.795455  
13,1,1596.760204  
13,1,2370.207031  
13,1,8267.642857  
13,1,96511.081250  
13,1,1644.479651  
13,1,4879.168750  
13,1,2487.457143  
13,1,1791.696429  
13,1,7431.750000  
13,1,4438.992647  
13,1,2027.600000  
13,1,1835.328125  
13,1,5592.948370  
13,1,2277.821970  
13,1,2940.761364

13,1,1606.349490  
13,1,51289.750000  
13,1,10342.467593  
13,1,98300.578947  
13,1,4285.239362  
13,1,2129.357143  
13,1,1786.081522  
13,1,2354.133929  
13,1,5300.970588  
13,1,4470.125000  
13,1,1911.596154  
13,1,2990.117647  
13,1,2692.013514  
13,1,141077.890244  
13,1,1970.791667  
13,1,9380.456897  
13,1,73322.559896  
13,1,1646.453488  
13,1,9086.435484  
13,1,49373.566406  
13,1,81104.375000  
13,1,2150.382143  
13,1,159335.558140  
13,1,1638.894231  
13,1,2206.641509  
13,1,37438.246324  
13,1,5925.604167  
13,1,19718.105263  
13,1,21082.420213  
13,1,1828.824324  
13,1,4344.910256  
13,1,1508.527174  
13,1,2543.700658  
13,1,27076.121711  
13,1,10756.877660  
13,1,5700.657609  
13,1,3577.546875  
13,1,90875.081081  
13,1,2256.639706  
13,1,3374.375000  
13,1,57314.175000  
13,1,126105.068750  
13,1,22191.082500  
13,1,2791.127717  
13,1,1922.892857  
13,1,1817.235465  
13,1,43142.641447  
13,1,28169.300000  
13,1,2388.352941  
13,1,98452.219512  
13,1,2190.666667  
13,1,65916.568182  
13,1,5361.907051  
13,1,31064.433333  
13,1,2390.240385  
13,1,2455.652439  
13,1,3448.333333  
13,1,4359.563953  
13,1,2663.038462  
13,1,81523.367647  
13,1,61356.169872  
13,1,1562.831633  
13,1,1999.607143  
13,1,2009.625000  
13,1,2417.026042  
13,1,13394.775000

13,1,2267.616279  
13,1,136990.666667  
13,1,2087.336806  
13,1,9455.046512  
13,1,47352.083333  
13,1,1573.718750  
13,1,1969.963415  
13,1,4120.428571  
13,1,5890.345588  
13,1,2443.483871  
13,1,1508.050000  
13,1,4270.645833  
13,1,7805.854167  
13,1,5059.891892  
13,1,13518.800000  
13,1,2462.853659  
13,1,12385.552419  
13,1,3177.053125  
13,1,3018.803571  
13,1,1935.339286  
13,1,2148.705882  
13,1,36212.967105  
13,1,1898.707447  
13,1,41579.992647  
13,1,40255.685714  
13,1,2439.350000  
13,1,18878.945312  
13,1,51145.338235  
13,1,14795.270833  
13,1,1675.127660  
13,1,1838.679054  
13,1,1801.562500  
13,1,3076.015244  
13,1,1500.250000  
13,1,1790.788043  
13,1,1652.119048  
13,1,77948.024390  
13,1,2274.604167  
13,1,11878.278846  
13,1,9102.278846  
13,1,2733.542683  
13,1,4475.187500  
13,1,5444.320000  
13,1,2117.894737  
13,1,39910.420732  
13,1,15367.714286  
13,1,36810.007353  
13,1,1774.327586  
13,1,1835.191489  
13,1,63589.675676  
13,1,2019.314103  
13,1,2596.105263  
13,1,1975.425595  
13,1,82110.435714  
13,1,52982.798611  
13,1,1810.562500  
13,1,1663.615385  
13,1,3595.760870  
13,1,60072.488372  
13,1,2875.750000  
13,1,1642.244186  
13,1,2197.989130  
13,1,4097.602041  
13,1,7022.732143  
13,1,6010.625000  
13,1,2072.657609

13,1,1519.600000  
13,1,41149.791667  
13,1,2195.666667  
13,1,17759.826087  
13,1,2879.062500  
13,1,8125.125000  
13,1,10442.925000  
13,1,5165.823529  
13,1,5641.797619  
13,1,65294.907051  
13,1,3740.641026  
13,1,40844.531250  
13,1,134475.133333  
13,1,7173.777439  
13,1,32884.093750  
13,1,120812.785714  
13,1,3183.000000  
13,1,1997.781250  
13,1,5306.390000  
13,1,23189.811170  
14,2,3238.763889  
14,2,2825.023256  
14,2,2042.993421  
14,2,3464.067708  
14,2,3134.476562  
14,2,3125.606383  
14,2,2742.156977  
14,2,1830.951220  
14,2,2213.510417  
14,2,3347.132075  
14,2,1513.687500  
14,2,2767.862245  
14,2,2381.652439  
14,2,1703.713542  
14,2,1615.647727  
14,2,23824.737500  
14,2,5495.803571  
14,2,3197.724490  
14,2,3048.564103  
14,2,3887.000000  
14,2,2217.435897  
14,2,30971.065217  
14,2,2720.121711  
14,2,14255.687500  
14,2,4409.216667  
14,2,4747.315625  
14,2,1766.673684  
14,2,1590.338028  
14,2,4924.150000  
14,2,4074.327778  
14,2,1506.587209  
14,2,2149.721154  
14,2,2438.382353  
14,2,3395.665179  
14,2,1525.319079  
14,2,6930.994565  
14,2,9587.391304  
14,2,2293.428571  
14,2,1979.000000  
14,2,7449.000000  
14,2,2400.500000  
14,2,23505.005435  
14,2,4036.289773  
14,2,1732.875000  
14,2,2630.000000  
14,2,4062.440789

14,2,3244.460000  
14,2,3873.364583  
14,2,1737.225000  
14,2,1805.130435  
14,2,3190.074468  
14,2,1679.964286  
14,2,3021.659574  
14,2,1955.497093  
14,2,2714.362832  
14,2,4903.888889  
14,2,2933.730263  
14,2,2772.896875  
14,2,3588.729167  
14,2,2628.982558  
14,2,10731.114796  
14,2,2944.600000  
14,2,3622.738372  
14,2,2414.083333  
14,2,3914.813559  
14,2,9013.213115  
14,2,2978.114583  
14,2,16547.725410  
14,2,2787.950581  
14,2,5367.764535  
14,2,2709.543269  
14,2,3171.451220  
14,2,10100.598039  
14,2,3902.745455  
14,2,4901.735294  
14,2,4177.694149  
14,2,3908.242647  
14,2,2997.535714  
14,2,2364.375000  
14,2,3201.085227  
14,2,4953.638298  
14,2,9089.000000  
14,2,5105.976852  
14,2,2959.722222  
14,2,4626.230769  
14,2,4010.908537  
14,2,6756.418919  
14,2,7076.259259  
14,2,3717.000000  
14,2,3618.333333  
14,2,1618.011111  
14,2,17980.224490  
14,2,1693.976744  
14,2,2153.085227  
14,2,3543.120000  
14,2,1685.375000  
14,2,2815.797872  
14,2,1819.105978  
14,2,2123.350000  
14,2,6012.153846  
14,2,1907.943878  
14,2,2095.235849  
14,2,4644.435185  
14,2,5157.930556  
14,2,5819.502262  
14,2,2301.397790  
14,2,2532.836957  
14,2,2452.916667  
14,2,1567.877907  
14,2,2406.375000  
14,2,1611.597500  
14,2,1543.695122

14,2,1883.618590  
14,2,4660.818182  
14,2,6809.029762  
14,2,2932.693878  
14,2,8053.112360  
14,2,5989.070652  
14,2,2548.948171  
14,2,2294.250000  
14,2,1617.229008  
14,2,8086.962312  
14,2,11547.551913  
14,2,5167.454286  
14,2,4211.903226  
14,2,9119.702128  
14,2,4380.556818  
14,2,2868.541667  
14,2,4331.892655  
14,2,2207.926380  
14,2,4568.813665  
14,2,2120.842105  
14,2,2396.391129  
14,2,1718.890244  
14,2,6138.741477  
14,2,1990.412500  
14,2,5085.125000  
14,2,2210.625000  
14,2,2807.238095  
14,2,2201.172414  
14,2,1865.634868  
14,2,1915.550000  
14,2,6566.950000  
14,2,4756.247312  
14,2,1604.758242  
14,2,1843.378676  
14,2,4682.077869  
14,2,1773.661458  
14,2,11436.322368  
14,2,1772.410377  
14,2,2844.323980  
14,2,1948.886905  
14,2,2706.923077  
14,2,8009.453988  
14,2,4861.750000  
14,2,2608.884615  
14,2,20073.033898  
14,2,9309.687500  
14,2,10327.453488  
14,2,2452.629808  
14,2,1633.393519  
14,2,7211.793860  
14,2,5945.863014  
14,2,3161.723464  
14,2,1568.484848  
14,2,1518.675595  
14,2,9994.330357  
14,2,4326.218750  
14,2,4087.200000  
14,2,3978.285714  
14,2,1634.332278  
14,2,3539.435897  
14,2,2326.437500  
14,2,7538.469512  
14,2,1529.543605  
14,2,4267.511628  
14,2,5575.000000  
14,2,1988.640000

14,2,5353.460106  
14,2,2619.910714  
14,2,4524.797872  
14,2,2019.934783  
14,2,3131.687500  
14,2,8242.166667  
14,2,2843.083333  
14,2,17756.344595  
14,2,4398.776442  
14,2,21342.031250  
14,2,8047.645833  
14,2,2195.761364  
14,2,1600.800000  
14,2,1887.750000  
14,2,6422.546875  
14,2,1774.412791  
14,2,4961.691860  
14,2,4152.787234  
14,2,2133.483974  
14,2,1756.187500  
14,2,3588.875000  
14,2,3239.312500  
14,2,1671.801471  
14,2,1835.457237  
14,2,1745.031250  
14,2,8183.750000  
14,2,4146.842105  
14,2,5141.913043  
14,2,9132.271186  
14,2,1880.875000  
14,2,1999.581395  
14,2,3935.186170  
14,2,2384.130890  
14,2,4229.715000  
14,2,2247.993421  
14,2,4821.375000  
14,2,1569.163265  
14,2,2420.120000  
14,2,5915.438830  
14,2,2038.594512  
14,2,1513.979592  
14,2,6598.553191  
14,2,3628.055556  
14,2,2929.873786  
14,2,2618.647059  
14,2,5762.893868  
14,2,2041.716463  
14,2,4956.486842  
14,2,1834.549342  
14,2,3487.125000  
14,2,2507.888158  
14,2,2494.634146  
14,2,3165.250000  
14,2,2393.845745  
14,2,4532.243421  
14,2,1863.410256  
14,2,1716.255319  
14,2,4323.924528  
14,2,1530.086538  
14,2,4499.238281  
14,2,3503.780660  
14,2,2562.606250  
14,2,2521.450000  
14,2,2039.478261  
14,2,1782.361486  
14,2,1976.931373

14,2,3699.617021  
14,2,3376.208333  
14,2,2815.824324  
14,2,1529.986111  
14,2,3199.215116  
14,2,10098.980769  
14,2,3084.275862  
14,2,1793.378125  
14,2,2358.500000  
14,2,2348.335526  
14,2,2213.636364  
14,2,4613.602041  
14,2,5970.445755  
14,2,4071.220588  
14,2,2663.160000  
14,2,4059.233553  
14,2,2329.063830  
14,2,3427.915000  
14,2,2095.815789  
14,2,3159.687500  
14,2,8564.344340  
14,2,10002.890625  
14,2,3698.409091  
14,2,5070.074324  
14,2,14894.254545  
14,2,10373.239796  
14,2,1653.051020  
14,2,6085.640000  
14,2,1687.222826  
14,2,1536.829341  
14,2,2772.453125  
14,2,4542.375000  
14,2,5925.504630  
14,2,2650.200581  
14,2,5218.041667  
14,2,5695.078125  
14,2,1951.750000  
14,2,9951.316964  
14,2,3104.000000  
14,2,1998.789894  
14,2,8164.382353  
14,2,2142.259259  
14,2,10576.795918  
14,2,2962.966667  
14,2,2823.845238  
14,2,2734.400000  
14,2,1738.902778  
14,2,5389.500000  
14,2,1884.716981  
14,2,1857.200000  
14,2,1777.353448  
14,2,7799.340909  
14,2,1899.866279  
14,2,7430.335938  
14,2,2074.688679  
14,2,3131.875000  
14,2,7533.645000  
14,2,3727.861413  
14,2,2141.636905  
14,2,1756.642857  
14,2,1696.000000  
14,2,3326.146875  
14,2,2389.159091  
14,2,8647.125000  
14,2,4249.679054  
14,2,4342.148387

14,2,4693.603659  
14,2,2516.812500  
14,2,20065.215278  
14,2,1682.575581  
14,2,2017.323529  
14,2,7371.566225  
14,2,1749.232143  
14,2,1965.154412  
14,2,2337.222222  
14,2,3095.737952  
14,2,2474.163265  
14,2,2480.811364  
14,2,4444.765625  
14,2,6608.437500  
14,2,1862.912500  
14,2,1787.320423  
14,2,3303.404412  
14,2,4260.832547  
14,2,3598.857558  
14,2,5278.656250  
14,2,15015.622396  
14,2,4395.889222  
14,2,2767.488281  
14,2,1996.666667  
14,2,5917.500000  
14,2,2398.975610  
14,2,1754.952381  
14,2,4681.294118  
14,2,2241.558140  
14,2,3851.900000  
14,2,1590.788043  
14,2,2969.160714  
14,2,4255.897321  
14,2,5654.599576  
14,2,3528.750000  
14,2,13946.067568  
14,2,6204.881410  
14,2,3512.023256  
14,2,2165.589744  
14,2,1748.164062  
14,2,2431.125000  
14,2,2941.918750  
14,2,1645.132143  
14,2,1761.428571  
14,2,1625.901163  
14,2,2286.493750  
14,2,2359.507812  
14,2,6173.050000  
14,2,2480.045455  
14,2,1548.127717  
14,2,12266.309091  
14,2,2665.938492  
14,2,6204.375000  
14,2,1978.260000  
14,2,3057.846154  
14,2,3743.881944  
14,2,5971.865000  
14,2,5402.312500  
14,2,2306.336538  
14,2,2259.343750  
14,2,1857.456731  
14,2,2112.352500  
14,2,1926.500000  
14,2,2673.659091  
14,2,9354.823864  
14,2,3763.057292

14,2,10595.968182  
14,2,4787.470588  
14,2,2142.641667  
14,2,2382.070122  
14,2,7976.217949  
14,2,3957.599359  
14,2,4402.595238  
14,2,3200.642857  
14,2,4306.219388  
14,2,5482.368243  
14,2,2034.288889  
14,2,6348.372093  
14,2,1744.193878  
14,2,1580.274390  
14,2,2180.405405  
14,2,2796.470930  
14,2,2301.464286  
14,2,157124.252404  
14,2,1625.500000  
14,2,1619.524457  
14,2,1835.632500  
14,2,2377.617647  
14,2,2579.125000  
14,2,5424.500000  
14,2,2720.216463  
14,2,5780.065476  
14,2,2141.418750  
14,2,3285.133929  
14,2,3485.438953  
14,2,2460.792453  
14,2,3698.615741  
14,2,2650.677083  
14,2,1924.943627  
14,2,2502.619444  
14,2,2245.346154  
14,2,5122.520833  
14,2,10367.500000  
14,2,2492.923469  
14,2,15025.868421  
14,2,4707.062500  
14,2,2179.375000  
14,2,2020.365854  
14,2,1833.690476  
14,2,3603.771028  
14,2,2472.250000  
14,2,3531.094340  
14,2,3371.318452  
14,2,7450.906250  
14,2,3439.630000  
14,2,2717.240000  
14,2,2822.081633  
14,2,1603.600000  
14,2,1584.625000  
14,2,4569.680851  
14,2,2962.637255  
14,2,6095.166667  
14,2,2587.450658  
14,2,6802.929825  
14,2,3258.142857  
14,2,2194.160714  
14,2,3404.132353  
14,2,2207.910256  
14,2,2734.221939  
14,2,2692.592105  
14,2,3029.574468  
14,2,7111.358491

14,2,1592.975806  
14,2,10463.612245  
14,2,2538.031977  
14,2,2372.319767  
14,2,5317.675676  
14,2,3200.913043  
14,2,7451.882979  
14,2,3992.482143  
14,2,1750.065217  
14,2,2288.655172  
14,2,5915.867187  
14,2,13457.303309  
14,2,1517.648810  
14,2,2858.402778  
14,2,4612.110795  
14,2,1917.500000  
14,2,5285.949074  
14,2,1756.250000  
14,2,3186.169118  
14,2,5215.476744  
14,2,2887.463415  
14,2,1978.829787  
14,2,7814.261628  
14,2,2972.138158  
14,2,1499.466912  
14,2,15943.916667  
14,2,26354.682927  
14,2,2994.125000  
14,2,2922.400000  
14,2,3340.343023  
14,2,2226.666667  
14,2,3843.309211  
14,2,1750.400000  
14,2,3012.930556  
14,2,3473.000000  
14,2,2320.957746  
14,2,3722.064935  
14,2,1502.022727  
14,2,1547.325581  
14,2,1972.812500  
14,2,1959.276042  
14,2,4886.968750  
14,2,1935.654605  
14,2,5111.368056  
14,2,1512.331081  
14,2,5537.767442  
14,2,6753.450000  
14,2,2384.314103  
14,2,3831.062500  
14,2,1717.185714  
14,2,2036.575000  
14,2,5496.625000  
14,2,2795.596354  
14,2,2125.733333  
14,2,4448.610465  
14,2,10082.828571  
14,2,20654.458333  
14,2,12618.829545  
14,2,2106.022500  
14,2,10202.905000  
14,2,2790.292683  
14,2,8816.836538  
14,2,4227.644886  
14,2,2146.656593  
14,2,4455.128205  
14,2,3626.858974

14,2,3170.538889  
14,2,2566.875000  
14,2,5480.296875  
14,2,2246.214286  
14,2,2893.952703  
14,2,1524.234043  
14,2,1886.575758  
14,2,1850.000000  
14,2,3355.385870  
14,2,1723.783784  
14,2,2132.397959  
14,2,2574.906250  
14,2,1913.760000  
14,2,2161.487500  
14,2,5347.734694  
14,2,1723.125000  
14,2,8891.416667  
14,2,5357.855114  
14,2,1754.256410  
14,2,1695.895833  
14,2,3600.243750  
14,2,8867.041667  
14,2,2453.871795  
14,2,10186.542763  
14,2,1524.235000  
14,2,2707.057432  
14,2,2580.200658  
14,2,3337.272727  
14,2,3707.720000  
14,2,1725.818182  
14,2,2369.453804  
14,2,5529.120253  
14,2,2661.768617  
14,2,1518.060000  
14,2,1832.701087  
14,2,1827.750000  
14,2,4243.588415  
14,2,4430.574219  
14,2,3351.252778  
14,2,6254.217949  
14,2,1788.666667  
14,2,2124.472727  
14,2,1614.977041  
14,2,3070.779070  
14,2,14572.681818  
14,2,2534.853814  
14,2,2280.722222  
14,2,2681.627660  
14,2,2091.261628  
14,2,10933.527778  
14,2,3144.534884  
14,2,4717.839286  
14,2,2530.459459  
14,2,2037.304545  
14,2,2831.002660  
14,2,1910.280488  
14,2,4687.562500  
14,2,1720.434783  
14,2,2753.375000  
14,2,2578.033333  
14,2,2168.089623  
14,2,1995.401099  
14,2,5046.465278  
14,2,4160.735294  
14,2,3461.874251  
14,2,3027.607955

14,2,6234.580189  
14,2,1755.225610  
14,2,5055.600000  
14,2,3869.173077  
14,2,1663.117021  
14,2,4429.659314  
14,2,2335.467949  
14,2,2624.083333  
14,2,3223.186441  
14,2,7218.766892  
14,2,3539.556250  
14,2,1887.653061  
14,2,8871.844595  
14,2,10483.184091  
14,2,3391.821429  
14,2,4987.546512  
14,2,1749.145833  
14,2,1737.975000  
14,2,2749.297414  
14,2,2302.187500  
14,2,5040.063830  
14,2,7632.866667  
14,2,2047.819712  
14,2,2619.863436  
14,2,2807.367021  
14,2,4899.273543  
14,2,1923.666667  
14,2,4399.012195  
14,2,1681.698529  
14,2,2968.428191  
14,2,4597.609091  
14,2,1651.378289  
14,2,2274.604167  
14,2,10093.093750  
14,2,1733.680851  
14,2,1995.875000  
14,2,2931.713115  
14,2,6642.747253  
14,2,4447.500000  
14,2,1855.727273  
14,2,2333.130435  
14,2,4544.145349  
14,2,1970.223837  
14,2,1817.428571  
14,2,2491.540000  
14,2,9061.428571  
14,2,5831.769231  
14,2,1891.558140  
14,2,1673.833333  
14,2,3970.454545  
14,2,3934.602941  
14,2,1590.695652  
14,2,5063.625000  
14,2,1842.578947  
14,2,2906.878049  
14,2,2224.205882  
14,2,8742.727273  
14,2,7583.281250  
14,2,5954.787037  
14,2,2532.937500  
14,2,4080.333333  
14,2,1567.372727  
14,2,4962.578947  
14,2,3801.000000  
14,2,1703.945513  
14,2,2171.328431

14,2,4946.069079  
14,2,1804.765244  
14,2,3430.000000  
14,2,3118.583333  
14,2,2287.804348  
14,2,2315.345455  
14,2,6913.413194  
14,2,3581.500000  
14,2,3401.315789  
14,2,4072.772436  
14,2,1808.433511  
14,2,6619.269231  
14,2,1869.852740  
14,2,1609.568182  
14,2,2046.884375  
14,2,2759.750000  
14,2,2311.386364  
14,2,8961.899038  
14,2,4393.020408  
14,2,4030.336066  
14,2,1780.766892  
14,2,1642.418478  
14,2,3077.105263  
14,2,2768.843750  
14,2,17380.430851  
14,2,2145.388889  
14,2,2160.855769  
14,2,1569.417614  
14,2,2124.390244  
14,2,4191.440000  
14,2,4225.838710  
14,2,2753.227778  
14,2,2162.880682  
14,2,1915.275000  
14,2,2738.055556  
14,2,8022.570312  
14,2,6218.639535  
14,2,4986.743056  
14,2,5464.735294  
14,2,2282.270408  
14,2,5008.553571  
14,2,3586.512987  
14,2,1540.617500  
14,2,1724.683140  
14,2,2332.054348  
14,2,2819.616071  
14,2,3832.795213  
14,2,3286.900000  
14,2,7524.204082  
14,2,1975.368421  
14,2,1549.553571  
14,2,8355.398438  
14,2,6848.167553  
14,2,3343.480000  
14,2,1643.616477  
14,2,5983.821429  
14,2,10082.402439  
14,2,1961.000000  
14,2,1510.039474  
14,2,2588.319079  
14,2,2430.236111  
14,2,1781.425000  
14,2,2851.416667  
14,2,7140.875000  
14,2,1972.763298  
14,2,3222.923077

14,2,4295.460526  
14,2,2393.271277  
14,2,3573.825581  
14,2,3285.465116  
14,2,4254.879902  
14,2,6073.273438  
14,2,1652.155405  
14,2,2871.106383  
14,2,6598.671429  
14,2,3454.826705  
14,2,1670.355978  
14,2,3992.812500  
14,2,2945.394444  
14,2,2496.230263  
14,2,3576.725000  
14,2,1910.652174  
14,2,4064.181818  
14,2,4797.372093  
14,2,5662.916667  
14,2,3811.333333  
14,2,4411.750000  
14,2,3560.476563  
14,2,1710.203125  
14,2,10693.986842  
14,2,2853.855346  
14,2,3030.069915  
14,2,2126.160714  
14,2,3246.860795  
14,2,2697.010417  
14,2,5100.707386  
14,2,4112.943396  
14,2,2242.345982  
14,2,1904.845745  
14,2,16781.327128  
14,2,3235.710526  
14,2,6425.863636  
14,2,1507.860465  
14,2,3067.547619  
14,2,3582.259259  
14,2,4992.896226  
14,2,1548.565068  
14,2,4806.666667  
14,2,1878.727273  
14,2,2495.292683  
14,2,5474.041667  
14,2,12229.250000  
14,2,3106.972973  
14,2,4127.033898  
14,2,5085.071429  
14,2,4367.438776  
14,2,2121.581152  
14,2,1633.566667  
14,2,5093.204082  
14,2,19968.490385  
14,2,3023.085000  
14,2,2507.087209  
14,2,1977.279070  
14,2,2831.057500  
14,2,5613.820122  
14,2,2754.033333  
14,2,3397.787791  
14,2,1756.434783  
14,2,11600.060870  
14,2,2226.335526  
14,2,2033.302326  
14,2,2634.524038

14,2,8170.112245  
14,2,6769.805804  
14,2,2496.156250  
14,2,3559.756098  
14,2,5557.090000  
14,2,3255.805556  
14,2,2069.937500  
14,2,11136.343023  
14,2,2661.383929  
14,2,4046.400000  
14,2,3446.845745  
14,2,1810.756579  
14,2,4260.097222  
14,2,3946.836066  
14,2,22204.752809  
14,2,2511.488095  
14,2,1656.308824  
14,2,3090.995327  
14,2,5767.134615  
14,2,2615.062500  
14,2,9385.586957  
14,2,2533.709239  
14,2,12850.834239  
14,2,7076.640000  
14,2,6108.829268  
14,2,3213.320000  
14,2,2359.892857  
14,2,6080.350962  
14,2,1883.928571  
14,2,1834.083333  
14,2,5127.894022  
14,2,2830.273936  
14,2,2826.898936  
14,2,1682.198171  
14,2,3334.593085  
14,2,1635.000000  
14,2,2646.256818  
14,2,2992.194712  
14,2,4724.706522  
14,2,2231.184783  
14,2,6970.938679  
14,2,8381.656250  
14,2,1884.477041  
14,2,1780.704545  
14,2,1688.981250  
14,2,3872.493902  
14,2,2600.517857  
14,2,4669.081250  
14,2,2159.950521  
14,2,1637.013514  
14,2,4083.990000  
14,2,3976.401163  
14,2,2039.411765  
14,2,2348.040000  
14,2,4638.362745  
14,2,3298.590000  
14,2,39776.266304  
14,2,1858.850000  
14,2,1709.452381  
14,2,2397.000000  
14,2,2714.984043  
14,2,3144.121324  
14,2,2334.712766  
14,2,1879.781250  
14,2,3347.311275  
14,2,1854.187500

14,2,1717.014286  
14,2,1642.494652  
14,2,3135.718750  
14,2,2638.090909  
14,2,2954.055556  
14,2,2256.158163  
14,2,3688.627232  
14,2,6061.768382  
14,2,4102.698171  
14,2,6054.755102  
14,2,5399.173913  
14,2,3102.250000  
14,2,5358.351351  
14,2,4280.000000  
14,2,2517.494318  
14,2,1680.941176  
14,2,1557.190000  
14,2,1829.029762  
14,2,6255.491848  
14,2,1760.157895  
14,2,46735.303571  
14,2,5901.852564  
14,2,1530.445946  
14,2,4108.742788  
14,2,6763.395408  
14,2,1906.812500  
14,2,2743.867647  
14,2,3732.687500  
14,2,8170.784884  
14,2,11385.000000  
14,2,4339.142857  
14,2,3508.409091  
14,2,5472.020000  
14,2,1794.455319  
14,2,4176.477612  
14,2,1938.375000  
14,2,1906.969512  
14,2,16282.884615  
14,2,5031.026042  
14,2,4066.245000  
14,2,1683.362500  
14,2,1941.723684  
14,2,2543.353659  
14,2,1586.893750  
14,2,3335.473404  
14,2,1718.233333  
14,2,2667.652720  
14,2,3415.846154  
14,2,6787.318182  
14,2,3262.666667  
14,2,11429.809417  
14,2,7360.431138  
14,2,6787.887255  
14,2,4773.527273  
14,2,3390.653846  
14,2,3383.105978  
14,2,1846.647059  
14,2,1766.000000  
14,2,2789.750000  
14,2,3127.119898  
14,2,2486.841667  
14,2,2418.517857  
14,2,5104.072266  
14,2,2931.974138  
14,2,1612.604651  
14,2,2195.419811

14,2,2647.222826  
14,2,3007.554688  
14,2,5415.029412  
14,2,5716.041667  
14,2,2333.853774  
14,2,6025.544118  
14,2,2650.280992  
14,2,1781.880000  
14,2,4142.592920  
14,2,2649.493902  
14,2,2590.411765  
14,2,2403.180000  
14,2,7796.628205  
14,2,5792.962963  
14,2,1534.733696  
14,2,2450.184783  
14,2,3597.886364  
14,2,1992.276316  
14,2,4844.477273  
14,2,2421.437500  
14,2,3075.278409  
14,2,2958.500000  
14,2,2285.121528  
14,2,2146.625000  
14,2,5074.548077  
14,2,8679.994565  
14,2,6102.584302  
14,2,3393.560000  
14,2,4858.140957  
14,2,4416.671875  
14,2,17345.172131  
14,2,2413.320513  
14,2,8556.907051  
14,2,1621.571429  
14,2,2970.838235  
14,2,5236.750000  
14,2,1906.621429  
14,2,4654.325581  
14,2,7241.611111  
14,2,8637.770833  
14,2,3885.917453  
14,2,2465.937500  
14,2,2084.230769  
14,2,1668.226974  
14,2,10713.687500  
14,2,2240.341667  
14,2,10693.099138  
14,2,4622.065934  
14,2,2755.969697  
14,2,1744.562500  
14,2,1767.589286  
14,2,1911.010870  
14,2,4946.224490  
14,2,4117.941860  
14,2,4094.467949  
14,2,2006.000000  
14,2,2095.750000  
14,2,1751.596939  
14,2,1737.799419  
14,2,2472.620000  
14,2,1542.312500  
14,2,2497.739130  
14,2,8931.670000  
14,2,2795.017500  
14,2,1758.638514  
14,2,2016.565625

14,2,2721.509804  
14,2,1802.512500  
14,2,5320.567500  
14,2,1774.111842  
14,2,6323.500000  
14,2,1808.333333  
14,2,2349.579268  
14,2,1851.234146  
14,2,4321.478873  
14,2,1876.657895  
14,2,4835.031250  
14,2,1663.829268  
14,2,2638.002564  
14,2,5464.945833  
14,2,1788.781250  
14,2,9246.777778  
14,2,3728.060897  
14,2,2014.675000  
14,2,2881.012195  
14,2,3238.778846  
14,2,2176.930000  
14,2,2282.481771  
14,2,1733.268817  
14,2,3385.544872  
14,2,1773.964744  
14,2,6539.055556  
14,2,1949.737805  
14,2,2709.861111  
14,2,5308.108696  
14,2,2364.263021  
14,2,36513.346154  
14,2,1537.540816  
14,2,1695.125000  
14,2,8604.219298  
14,2,3554.533537  
14,2,1954.783333  
14,2,1582.470109  
14,2,3581.047368  
14,2,7232.352740  
14,2,1679.322581  
14,2,2130.492647  
14,2,3879.363636  
14,2,3045.013889  
14,2,1875.583333  
14,2,3191.176630  
14,2,1768.668874  
14,2,4430.560976  
14,2,19853.039062  
14,2,5481.554348  
14,2,2131.200000  
14,2,23047.860465  
14,2,2423.750000  
14,2,1984.980978  
14,2,2371.647500  
14,2,2275.806034  
14,2,1840.041667  
14,2,2977.956522  
14,2,3087.727273  
14,2,3274.367021  
14,2,7988.737805  
14,2,1568.798780  
14,2,1710.320000  
14,2,3207.750000  
14,2,4448.774809  
14,2,2293.771341  
14,2,2826.866667

14,2,2079.657500  
14,2,1661.182432  
14,2,3934.781863  
14,2,2104.952381  
14,2,2885.774390  
14,2,1686.803665  
14,2,3067.354651  
14,2,1851.656250  
14,2,6556.125000  
14,2,1632.136364  
14,2,2246.400000  
14,2,4686.116279  
14,2,1932.312500  
14,2,2600.166667  
14,2,2666.536458  
14,2,1668.851190  
14,2,1912.122093  
14,2,4617.200000  
14,2,2952.659091  
14,2,4729.731707  
14,2,5175.971154  
14,2,1859.908784  
14,2,1955.080357  
14,2,4646.500000  
14,2,1789.652778  
14,2,3651.363636  
14,2,2307.504902  
14,2,3376.104730  
14,2,3108.145161  
14,2,2436.289773  
14,2,1820.789634  
14,2,3426.208333  
14,2,2122.723404  
14,2,3145.291667  
14,2,4214.231707  
14,2,2743.857143  
14,2,2547.790698  
14,2,1518.479452  
14,2,7174.525000  
14,2,6560.410959  
14,2,2274.650000  
14,2,4234.677632  
14,2,1514.825000  
14,2,2998.700000  
14,2,1509.000000  
14,2,2316.400000  
14,2,3101.377451  
14,2,3248.875000  
14,2,1889.339286  
14,2,4141.665865  
14,2,3869.920530  
14,2,2740.382979  
14,2,8008.691964  
14,2,4453.102273  
14,2,1666.289474  
14,2,16315.933333  
14,2,13364.125000  
14,2,2039.708333  
14,2,19436.791667  
14,2,3340.379121  
14,2,1558.630952  
14,2,10543.583333  
14,2,3970.606061  
14,2,8037.102941  
14,2,12119.673469  
14,2,4280.296875

14,2,38831.005435  
14,2,11231.656250  
14,2,2820.363636  
14,2,4279.865079  
14,2,1886.909884  
14,2,3193.764706  
14,2,7434.485714  
14,2,5007.795000  
14,2,2909.300595  
14,2,1653.825000  
14,2,3253.971591  
14,2,3191.490000  
14,2,2075.386792  
14,2,4368.147059  
14,2,6781.627273  
14,2,5787.511628  
14,2,16309.080508  
14,2,2844.067308  
14,2,12140.267442  
14,2,3146.579167  
14,2,3714.327586  
14,2,3219.547170  
14,2,4177.461538  
14,2,3894.289474  
14,2,37335.692308  
14,2,1583.384375  
14,2,2409.366071  
14,2,1580.829545  
14,2,3222.343750  
14,2,3581.473684  
14,2,3260.133333  
14,2,2992.172414  
14,2,2466.559091  
14,2,3401.976563  
14,2,4468.088235  
14,2,3764.693627  
14,2,1838.925532  
14,2,12593.867424  
14,2,2583.750000  
14,2,1866.769231  
14,2,1547.953488  
14,2,4042.097222  
14,2,3695.524336  
14,2,7157.630435  
14,2,4654.095238  
14,2,50946.705882  
14,2,3053.788043  
14,2,1759.835366  
14,2,9055.744681  
14,2,6786.899390  
14,2,3114.440341  
14,2,8604.158163  
14,2,1921.350000  
14,2,2442.331081  
14,2,1682.258152  
14,2,3929.769231  
14,2,8766.390957  
14,2,3224.379630  
14,2,2918.230769  
14,2,3409.415761  
14,2,2320.470109  
14,2,3304.725694  
14,2,6247.357500  
14,2,3898.646226  
14,2,4070.168367  
14,2,2598.043478

14,2,20274.679688  
14,2,4998.958333  
14,2,8399.420732  
14,2,6781.837121  
14,2,2225.281250  
14,2,1957.366667  
14,2,2162.690341  
14,2,1854.255319  
14,2,4956.489362  
14,2,13855.568396  
14,2,2809.338235  
14,2,7643.500000  
14,2,8033.069444  
14,2,3165.290698  
14,2,2784.725000  
14,2,2696.977273  
14,2,1769.037500  
14,2,4161.765957  
14,2,2693.711538  
14,2,9661.944444  
14,2,4289.178571  
14,2,3536.156863  
14,2,2893.187500  
14,2,5731.915179  
14,2,4153.625000  
14,2,6636.417112  
14,2,4398.317073  
14,2,3644.750000  
14,2,1509.765625  
14,2,10758.130435  
14,2,3454.085227  
14,2,3865.264706  
14,2,7927.583333  
14,2,2097.671053  
14,2,8216.827225  
14,2,4454.085366  
14,2,2634.038043  
14,2,5162.923077  
14,2,4386.511364  
14,2,1976.360294  
14,2,2039.817857  
14,2,6407.196809  
14,2,4338.025140  
14,2,2171.648649  
14,2,2159.979167  
14,2,3662.237245  
14,2,4401.333333  
14,2,68889.570313  
14,2,12910.597656  
14,2,2104.281915  
14,2,2129.475000  
14,2,1774.076531  
14,2,3179.937500  
14,2,2790.019231  
14,2,1756.050000  
14,2,1538.031250  
14,2,3344.868421  
14,2,2278.138889  
14,2,1618.000000  
14,2,3598.238208  
14,2,1933.926829  
14,2,10145.825758  
14,2,2028.423469  
14,2,6254.122881  
14,2,1583.117647  
14,2,3842.825000

14,2,2492.497024  
14,2,1540.269231  
14,2,1726.750000  
14,2,7126.625000  
14,2,3335.339286  
14,2,1838.826531  
14,2,3225.519231  
14,2,2176.586957  
14,2,1614.066667  
14,2,10441.308140  
14,2,4825.260638  
14,2,8595.300532  
14,2,3914.428571  
14,2,2145.212500  
14,2,1531.823529  
14,2,2262.990385  
14,2,1714.213415  
14,2,2025.186275  
14,2,9309.172872  
14,2,1804.182266  
14,2,2674.100559  
14,2,8895.397959  
14,2,2815.265403  
14,2,1790.277778  
14,2,2207.707447  
14,2,2040.722222  
14,2,5412.534722  
14,2,2240.108108  
14,2,3286.209459  
14,2,2600.312500  
14,2,3178.143229  
14,2,2671.261364  
14,2,4928.180556  
14,2,4578.141892  
14,2,1913.133929  
14,2,3564.773026  
14,2,2751.720930  
14,2,2200.812500  
14,2,6528.656250  
14,2,3429.529070  
14,2,4071.479452  
14,2,3987.641509  
14,2,2431.776316  
14,2,8263.149123  
14,2,13802.183140  
14,2,2842.875000  
14,2,2424.074468  
14,2,1701.776316  
14,2,1820.010989  
14,2,1545.096491  
14,2,3621.850000  
14,2,3447.781250  
14,2,1967.539474  
14,2,5609.607143  
14,2,2094.977273  
14,2,1602.062500  
14,2,3197.375000  
14,2,5467.845109  
14,2,1504.956522  
14,2,2101.971591  
14,2,3964.642857  
14,2,2662.989362  
14,2,1941.387500  
14,2,4773.579545  
14,2,12572.962500  
14,2,1501.608108

14,2,1502.682432  
14,2,3092.903846  
14,2,25423.647959  
14,2,2730.691860  
14,2,2869.428571  
14,2,2435.380208  
14,2,4975.701705  
14,2,2633.562500  
14,2,4181.545213  
14,2,2249.982143  
14,2,14061.714286  
14,2,3240.500000  
14,2,1502.658537  
14,2,7098.000000  
14,2,5414.382576  
14,2,17688.600000  
14,2,2831.869565  
14,2,2799.965517  
14,2,1503.402439  
14,2,3049.972222  
14,2,2660.946429  
14,2,1519.310811  
14,2,9734.199519  
14,2,2843.209184  
14,2,1707.296875  
14,2,7524.125000  
14,2,2132.284314  
14,2,2270.978571  
14,2,4941.350000  
14,2,2331.079082  
14,2,2489.209302  
14,2,2796.240566  
14,2,2621.324324  
14,2,1894.843750  
14,2,6396.062500  
14,2,2094.755952  
14,2,2164.048295  
14,2,2527.874459  
14,2,1998.739362  
14,2,2382.509259  
14,2,2276.833333  
14,2,4154.678571  
14,2,4103.818182  
14,2,2179.712766  
14,2,6601.904255  
14,2,2313.411765  
14,2,6879.500000  
14,2,2027.531915  
14,2,1763.000000  
14,2,1775.959302  
14,2,4951.729592  
14,2,3571.583333  
14,2,9984.940341  
14,2,1667.773585  
14,2,3659.933511  
14,2,7866.157895  
14,2,3260.131250  
14,2,3145.052083  
14,2,2148.053191  
14,2,1653.672414  
14,2,6097.965909  
14,2,6785.827586  
14,2,1902.420732  
14,2,3211.664286  
14,2,1559.234043  
14,2,1520.791262

14,2,1991.425824  
14,2,2754.316327  
14,2,1662.219512  
14,2,2715.716667  
14,2,2073.234375  
14,2,1608.285326  
14,2,3263.543103  
14,2,7318.346154  
14,2,42444.900000  
14,2,4924.454545  
14,2,4384.911932  
14,2,4602.716346  
14,2,3163.750000  
14,2,4762.796196  
14,2,1860.113372  
14,2,4057.402985  
14,2,25605.810811  
14,2,8286.375000  
14,2,4670.505682  
14,2,1753.784884  
14,2,3110.620098  
14,2,1940.768868  
14,2,7534.451923  
14,2,1725.854730  
14,2,2592.083333  
14,2,2987.516447  
14,2,3280.125000  
14,2,3561.362069  
14,2,2249.861702  
14,2,2859.495000  
14,2,2574.050000  
14,2,1952.365385  
14,2,4302.093750  
14,2,2818.000000  
14,2,6563.021277  
14,2,3354.445652  
14,2,2570.875000  
14,2,4198.833333  
14,2,2044.805556  
14,2,4635.685185  
14,2,3269.750000  
14,2,6982.866071  
14,2,3596.223404  
14,2,9469.765625  
14,2,1687.258929  
14,2,2109.417857  
14,2,2681.417857  
14,2,1794.218750  
14,2,2809.861111  
14,2,7783.458333  
14,2,2836.567073  
14,2,5262.580189  
14,2,4408.683511  
14,2,1745.840909  
14,2,11407.494048  
14,2,3283.106383  
14,2,2157.763889  
14,2,3825.426829  
14,2,6314.810000  
14,2,4408.104167  
14,2,6592.063559  
14,2,4184.212500  
14,2,2041.146341  
14,2,4232.407895  
14,2,2165.047904  
14,2,4592.200000

14,2,3258.240000  
14,2,1801.838068  
14,2,2676.243902  
14,2,1808.959375  
14,2,3759.800000  
14,2,4234.388298  
14,2,2835.264286  
14,2,6506.702500  
14,2,2261.666667  
14,2,3457.101064  
14,2,9127.750000  
14,2,2650.584071  
14,2,2626.338542  
14,2,3771.305000  
14,2,2092.576923  
14,2,3494.825581  
14,2,5086.975962  
14,2,1500.567568  
14,2,1783.630952  
14,2,3433.477143  
14,2,4248.548387  
14,2,5649.688889  
14,2,8232.527778  
14,2,2988.297297  
14,2,1681.933333  
14,2,2937.435484  
14,2,7558.813559  
14,2,4500.337209  
14,2,1612.402778  
14,2,3738.940625  
14,2,1935.035000  
14,2,1856.177083  
14,2,13050.465278  
14,2,3528.869186  
14,2,3470.617021  
14,2,1669.960366  
14,2,5140.052632  
14,2,2009.125000  
14,2,4334.943750  
14,2,1915.636364  
14,2,8329.547872  
14,2,3079.446154  
14,2,1969.651163  
14,2,5295.706395  
14,2,5533.828947  
14,2,2241.037037  
14,2,2307.707317  
14,2,2224.555556  
14,2,1628.902098  
14,2,5577.000000  
14,2,2659.737624  
14,2,3213.971014  
14,2,4123.625000  
14,2,4189.303571  
14,2,6321.121951  
14,2,7372.333333  
14,2,1699.132353  
14,2,7747.010204  
14,2,3634.678322  
14,2,8170.833333  
14,2,1819.175000  
14,2,5752.644737  
14,2,2466.055215  
14,2,1648.129032  
14,2,4437.836066  
14,2,6166.982379

14,2,1687.069444  
14,2,6239.431818  
14,2,5611.068396  
14,2,3149.750000  
14,2,1781.701220  
14,2,9096.308824  
14,2,14769.466981  
14,2,1775.295455  
14,2,10810.598958  
14,2,6366.125000  
14,2,33650.100000  
14,2,3053.578431  
14,2,6833.235795  
14,2,3694.304878  
14,2,1878.182432  
14,2,6611.744565  
14,2,19747.225000  
14,2,3764.773148  
14,2,8867.828488  
14,2,1657.189189  
14,2,2738.752294  
14,2,4010.653846  
14,2,2561.500000  
14,2,1857.351562  
14,2,2623.351064  
14,2,1683.289894  
14,2,4670.038636  
14,2,1706.645349  
14,2,4422.882812  
14,2,4745.924479  
14,2,2085.105978  
14,2,2767.500000  
14,2,2154.908854  
14,2,6304.186224  
14,2,6619.259259  
14,2,2368.672515  
14,2,1732.058140  
14,2,1514.217105  
14,2,2357.034884  
14,2,2924.822917  
14,2,1615.693750  
14,2,2523.570423  
14,2,14025.730769  
14,2,2130.796875  
14,2,2447.696970  
14,2,14880.476415  
14,2,4911.195312  
14,2,1921.830000  
14,2,2692.346154  
14,2,2509.836957  
14,2,1756.451613  
14,2,1504.117647  
14,2,4804.153061  
14,2,2659.236111  
14,2,6741.970930  
14,2,5921.416667  
14,2,2394.379310  
14,2,7056.800000  
14,2,4681.878378  
14,2,3938.415525  
14,2,3579.495614  
14,2,3292.903846  
14,2,11389.288889  
14,2,5706.531977  
14,2,2778.075000  
14,2,2975.595745

14,2,9832.529891  
14,2,1808.817961  
14,2,2405.204545  
14,2,9393.287234  
14,2,2750.633721  
14,2,2682.300000  
14,2,2766.441176  
14,2,2227.627660  
14,2,1785.852273  
14,2,2012.375000  
14,2,2205.648810  
14,2,5714.478261  
14,2,2695.750000  
14,2,4017.343750  
14,2,2020.302632  
14,2,3507.970000  
14,2,1783.716667  
14,2,7902.411585  
14,2,2120.183962  
14,2,1926.600000  
14,2,2988.878378  
14,2,3692.145089  
14,2,7034.000000  
14,2,2496.533854  
14,2,1648.148810  
14,2,7116.544643  
14,2,4097.227564  
14,2,2382.234375  
14,2,9645.485795  
14,2,7589.903846  
14,2,3393.375000  
14,2,3055.264151  
14,2,4510.162037  
14,2,2688.125000  
14,2,7128.500000  
14,2,2408.000000  
14,2,1730.914894  
14,2,3116.056818  
14,2,1847.776316  
14,2,8048.375000  
14,2,3614.475000  
14,2,2357.950980  
14,2,2044.445513  
14,2,3186.381757  
14,2,2042.945652  
14,2,1533.040816  
14,2,1760.909091  
14,2,3220.958333  
14,2,2244.219595  
14,2,3061.528302  
14,2,2596.288462  
14,2,5241.571429  
14,2,3537.641304  
14,2,1603.050000  
14,2,6195.687500  
14,2,2730.541667  
14,2,1637.030660  
14,2,2911.236702  
14,2,3598.000000  
14,2,7843.163636  
14,2,5415.453125  
14,2,4940.314815  
14,2,1868.618056  
14,2,2231.866667  
14,2,3835.811321  
14,2,1530.750000

14,2,5376.687500  
14,2,2622.098485  
14,2,1620.807453  
14,2,3784.428571  
14,2,1849.627451  
14,2,1746.412162  
14,2,3655.923077  
14,2,2852.026316  
14,2,3513.095930  
14,2,2213.818182  
14,2,1684.868421  
14,2,5398.800000  
14,2,1660.714286  
14,2,1991.390374  
14,2,1788.200000  
14,2,2237.520930  
14,2,2634.573770  
14,2,2654.963235  
14,2,1633.000000  
14,2,2041.631944  
14,2,4642.012821  
14,2,4309.782609  
14,2,13948.747449  
14,2,4452.487805  
14,2,3930.174569  
14,2,1548.353659  
14,2,4115.012195  
14,2,2217.786585  
14,2,5815.235000  
14,2,9237.366667  
14,2,6102.857143  
14,2,7486.044444  
14,2,2937.848837  
14,2,11155.544503  
14,2,1516.818841  
14,2,7651.875000  
14,2,1690.010204  
14,2,2392.927632  
14,2,2385.356250  
14,2,5888.627660  
14,2,2570.739865  
14,2,3792.477273  
14,2,15441.125000  
14,2,4191.300000  
14,2,2276.581395  
14,2,7811.884434  
14,2,6065.419271  
14,2,4081.863636  
14,2,3471.323864  
14,2,2659.482143  
14,2,8001.761628  
14,2,32406.986413  
14,2,4921.884146  
14,2,2232.125000  
14,2,46156.258929  
14,2,3153.937500  
14,2,1657.944149  
14,2,5513.469444  
14,2,3806.285714  
14,2,7402.422414  
14,2,2637.172619  
14,2,4295.128289  
14,2,3462.733607  
14,2,4708.088942  
14,2,7087.513889  
14,2,1585.000000

14,2,6787.333333  
14,2,39920.566810  
14,2,1515.655172  
14,2,10601.549479  
14,2,3578.406250  
14,2,6581.851485  
14,2,4932.892857  
14,2,2099.133929  
14,2,1815.010638  
14,2,1967.397727  
14,2,2922.142857  
14,2,4475.864796  
14,2,2316.426724  
14,2,3793.169444  
14,2,4460.847222  
14,2,6382.976744  
14,2,2920.250000  
14,2,2269.110465  
14,2,4726.442308  
14,2,1854.928977  
14,2,1546.111842  
14,2,7234.559278  
14,2,5323.617021  
14,2,1815.690909  
14,2,43034.565217  
14,2,2549.993056  
14,2,4668.352941  
14,2,1805.404762  
14,2,6376.135135  
14,2,3349.866279  
14,2,3085.557500  
14,2,1736.894737  
14,2,3075.852778  
14,2,4827.600000  
14,2,1616.500000  
14,2,3233.954787  
14,2,1606.564103  
14,2,4019.753571  
14,2,2697.321429  
14,2,2873.500000  
14,2,1646.081731  
14,2,2058.035714  
14,2,3181.161765  
14,2,1743.776316  
14,2,4704.303571  
14,2,7467.882143  
14,2,2380.926829  
14,2,2050.687500  
14,2,2166.928571  
14,2,1874.368557  
14,2,5204.519355  
14,2,2728.717391  
14,2,5570.651786  
14,2,1939.950000  
14,2,2428.323171  
14,2,1873.836957  
14,2,2354.115385  
14,2,1556.500000  
14,2,3309.074324  
14,2,3010.678571  
14,2,3141.168605  
14,2,1998.567073  
14,2,1579.048780  
14,2,3770.239130  
14,2,5102.246324  
14,2,1935.855263

14,2,3304.350877  
14,2,3567.417763  
14,2,2923.314655  
14,2,1879.297872  
14,2,1733.140306  
14,2,2279.292683  
14,2,2363.562500  
14,2,2687.415816  
14,2,3021.187500  
14,2,1983.135204  
14,2,4066.559211  
14,2,5866.450000  
14,2,4414.454268  
14,2,2775.815217  
14,2,8228.666667  
14,2,3641.502551  
14,2,2676.098837  
14,2,2066.854167  
14,2,5768.948529  
14,2,6336.922018  
14,2,3096.062500  
14,2,35642.222727  
14,2,5618.114865  
14,2,4518.075581  
14,2,6190.058594  
14,2,2144.621528  
14,2,3843.875000  
14,2,2285.441667  
14,2,7336.430769  
14,2,18317.599537  
14,2,2221.500000  
14,2,2980.344828  
14,2,2377.277778  
14,2,4254.062500  
14,2,4950.937500  
14,2,4596.848958  
14,2,1672.872549  
14,2,2119.000000  
14,2,3942.131579  
14,2,7959.666667  
14,2,7549.991935  
14,2,10553.994898  
14,2,1970.306122  
14,2,11579.756098  
14,2,3538.273810  
14,2,6969.884615  
14,2,4921.995370  
14,2,4703.731481  
14,2,9337.771226  
14,2,4635.759375  
14,2,10799.368952  
14,2,4584.642361  
14,2,2532.412791  
14,2,3924.111111  
14,2,8061.504717  
14,2,2488.281250  
14,2,4367.641026  
14,2,1737.416667  
14,2,7045.436047  
14,2,2560.298077  
14,2,7611.466216  
14,2,2117.695455  
14,2,3476.391892  
14,2,13644.675439  
14,2,2825.272727  
14,2,7215.906250

14,2,2330.649390  
14,2,1655.442308  
14,2,2117.706250  
14,2,4633.717391  
14,2,4377.941176  
14,2,3191.857143  
14,2,7380.245455  
14,2,5748.264151  
14,2,2730.009615  
14,2,1859.312500  
14,2,2321.242188  
14,2,11021.223214  
14,2,2530.149289  
14,2,2190.556250  
14,2,1990.202703  
14,2,3273.721154  
14,2,5155.997222  
14,2,10617.395833  
14,2,2036.040323  
14,2,3651.006098  
14,2,2280.038043  
14,2,1599.619048  
14,2,2855.396739  
14,2,1836.886628  
14,2,2296.304878  
14,2,6081.812500  
14,2,4569.814189  
14,2,4126.293269  
14,2,5363.481557  
14,2,3796.857143  
14,2,2290.500000  
14,2,3290.745370  
14,2,3707.095238  
14,2,4718.880102  
14,2,4348.470745  
14,2,5655.361111  
14,2,2417.445122  
14,2,1599.400000  
14,2,4391.210227  
14,2,2374.187500  
14,2,2029.000000  
14,2,1977.231132  
14,2,4655.813889  
14,2,1938.752315  
14,2,3007.800847  
14,2,5579.408824  
14,2,1500.931034  
14,2,4024.071429  
14,2,2333.455556  
14,2,2239.762500  
14,2,6374.495098  
14,2,2565.000000  
14,2,1746.390625  
14,2,4956.750000  
14,2,5863.175000  
14,2,1653.291667  
14,2,4037.168605  
14,2,1569.806373  
14,2,26196.531915  
14,2,2851.095238  
14,2,4158.023256  
14,2,5946.459135  
14,2,1660.071429  
14,2,3295.989583  
14,2,6122.384615  
14,2,3925.148438

14,2,3449.769231  
14,2,2485.327778  
14,2,15119.714286  
14,2,1936.510638  
14,2,2585.393939  
14,2,1718.576087  
14,2,6008.360000  
14,2,1549.711538  
14,2,2378.837500  
14,2,1514.986842  
14,2,4727.527778  
14,2,11156.656250  
14,2,1754.849265  
14,2,2181.028571  
14,2,4253.538462  
14,2,11014.282609  
14,2,4934.125000  
14,2,6711.709677  
14,2,4439.008929  
14,2,3477.175000  
14,2,1742.907143  
14,2,4552.931034  
14,2,4394.949519  
14,2,5565.647059  
14,2,2381.051020  
14,2,1542.968750  
14,2,2198.227500  
14,2,4031.510638  
14,2,3255.490566  
14,2,8434.265625  
14,2,2038.684783  
14,2,1531.048469  
14,2,9522.059783  
14,2,3507.409483  
14,2,51756.344340  
14,2,9520.765625  
14,2,1708.750000  
14,2,4487.426230  
14,2,1878.593750  
14,2,3169.232500  
14,2,1883.832143  
14,2,5277.050000  
14,2,2247.920455  
14,2,2225.554688  
14,2,2546.258152  
14,2,7116.926020  
14,2,5233.638514  
14,2,4759.012295  
14,2,10157.000000  
14,2,2882.000000  
14,2,5790.191176  
14,2,2004.342105  
14,2,2163.220833  
14,2,2819.814394  
14,2,4012.355556  
14,2,2875.513298  
14,2,2202.926282  
14,2,4306.026163  
14,2,1927.375000  
14,2,5566.197917  
14,2,4447.281250  
14,2,1853.625000  
14,2,1810.113208  
14,2,3674.585366  
14,2,2128.379310  
14,2,5229.389706

14,2,2340.958333  
14,2,9349.089286  
14,2,1911.914474  
14,2,19161.860465  
14,2,2377.778226  
14,2,3479.535377  
14,2,2726.250000  
14,2,2392.021930  
14,2,1832.100000  
14,2,5009.460366  
14,2,2477.735849  
14,2,4316.333333  
14,2,2892.609375  
14,2,15640.500000  
14,2,2716.558824  
14,2,5274.070122  
14,2,4480.519737  
14,2,2155.654762  
14,2,2725.510204  
14,2,1793.278125  
14,2,2297.135417  
14,2,5573.178977  
14,2,3408.411765  
14,2,2830.694444  
14,2,18471.803191  
14,2,4022.979167  
14,2,2784.502841  
14,2,1884.439462  
14,2,1996.598837  
14,2,2608.612903  
14,2,1533.638889  
14,2,3025.888889  
14,2,1875.012019  
14,2,4771.095930  
14,2,4032.545455  
14,2,10459.114068  
14,2,1564.078947  
14,2,3825.296512  
14,2,4951.091518  
14,2,6361.555556  
14,2,2004.714286  
14,2,1845.477778  
14,2,2035.367347  
14,2,1824.804054  
14,2,1871.989130  
14,2,3250.822500  
14,2,1694.857955  
14,2,1712.916667  
14,2,3380.983957  
14,2,1830.579787  
14,2,3646.187500  
14,2,2911.846591  
14,2,2169.407895  
14,2,5578.670918  
14,2,2813.400000  
14,2,1766.968750  
14,2,1942.053125  
14,2,3729.333333  
14,2,2530.458333  
14,2,5311.485294  
14,2,1913.446809  
14,2,4509.018868  
14,2,3836.745000  
14,2,2875.888889  
14,2,9035.096939  
14,2,3408.230769

14,2,2359.090909  
14,2,2502.700000  
14,2,5544.245098  
14,2,2959.887755  
14,2,2142.477941  
14,2,9820.776163  
14,2,3568.085938  
14,2,1560.415385  
14,2,3095.741935  
14,2,6519.145408  
14,2,4923.160326  
14,2,3366.377717  
14,2,11601.972222  
14,2,2820.034574  
14,2,2453.080556  
14,2,8581.545455  
14,2,1685.005952  
14,2,1827.600000  
14,2,3505.279762  
14,2,4188.155405  
14,2,2728.051282  
14,2,5782.125000  
14,2,3681.722772  
14,2,2483.804878  
14,2,6321.636771  
14,2,2421.457547  
14,2,1705.038043  
14,2,2492.280405  
14,2,2646.289062  
14,2,8650.807692  
14,2,2011.094444  
14,2,65601.585938  
14,2,3454.128205  
14,2,2292.057143  
14,2,2935.617021  
14,2,2748.875000  
14,2,1614.085366  
14,2,1983.013158  
14,2,1681.710526  
14,2,2075.555000  
14,2,5488.662736  
14,2,3687.658537  
14,2,4438.566406  
14,2,3171.181250  
14,2,1602.048913  
14,2,2143.268293  
14,2,18140.269231  
14,2,22963.687500  
14,2,3048.266667  
14,2,2604.000000  
14,2,1782.227778  
14,2,2693.404255  
14,2,3059.541667  
14,2,5794.117021  
14,2,4147.625000  
14,2,2150.988636  
14,2,2066.696078  
14,2,1676.511111  
14,2,3944.872727  
14,2,2335.500000  
14,2,1526.903846  
14,2,1909.529412  
14,2,8112.049180  
14,2,8739.558824  
14,2,2185.750000  
14,2,6247.352941

14,2,6081.191860  
14,2,6176.393868  
14,2,3915.942308  
14,2,3603.602273  
14,2,9289.376812  
14,2,3474.222973  
14,2,1955.125000  
14,2,4317.282051  
14,2,3394.250000  
14,2,4855.779412  
14,2,2925.176136  
14,2,2887.702128  
14,2,2090.615385  
14,2,2360.059880  
14,2,5731.381818  
14,2,7857.710106  
14,2,2569.328125  
14,2,1974.189024  
14,2,1820.890625  
14,2,2299.489130  
14,2,3813.618590  
14,2,3175.125000  
14,2,45235.678571  
14,2,2259.000000  
14,2,2073.320000  
14,2,3900.265625  
14,2,4284.289216  
14,2,7062.625000  
14,2,3254.200521  
14,2,1931.097826  
14,2,1575.875000  
14,2,3441.809524  
14,2,7741.500000  
14,2,2628.281250  
14,2,1609.335526  
14,2,1810.799401  
14,2,2298.922500  
14,2,7528.000000  
14,2,1862.885417  
14,2,3689.481707  
14,2,11924.021277  
14,2,4449.563636  
14,2,4390.911111  
14,2,2208.011364  
14,2,5678.127660  
14,2,4458.125000  
14,2,1895.359375  
14,2,4113.283019  
14,2,1966.087838  
14,2,5533.627451  
14,2,2064.341216  
14,2,4862.263158  
14,2,4112.576923  
14,2,4537.125000  
14,2,3118.346154  
14,2,1813.128571  
14,2,4504.426087  
14,2,4867.853659  
14,2,1994.635417  
14,2,15694.714286  
14,2,4927.427419  
14,2,2289.826923  
14,2,1655.569444  
14,2,3660.894472  
14,2,4953.264151  
14,2,16105.292969

14,2,3124.588235  
14,2,2359.510638  
14,2,6792.933333  
14,2,1887.016667  
14,2,5738.687500  
14,2,1601.526042  
14,2,5142.434524  
14,2,1893.216146  
14,2,3053.046512  
14,2,18418.222222  
14,2,1905.166667  
14,2,5177.960938  
14,2,2731.405405  
14,2,2337.211538  
14,2,1731.744565  
14,2,10958.916667  
14,2,2661.910714  
14,2,6856.250000  
14,2,2741.653846  
14,2,3407.972727  
14,2,3394.338235  
14,2,3495.452381  
14,2,2213.926136  
14,2,6675.161458  
14,2,4116.750000  
14,2,7396.445000  
14,2,1659.488372  
14,2,17043.127451  
14,2,3869.354839  
14,2,2098.471698  
14,2,3166.421296  
14,2,3175.962766  
14,2,1757.122449  
14,2,1804.460000  
14,2,4515.687500  
14,2,4454.166667  
14,2,5315.012821  
14,2,2658.134615  
14,2,1881.250000  
14,2,10227.085106  
14,2,1508.709459  
14,2,1815.018182  
14,2,6322.112069  
14,2,4672.610390  
14,2,2405.133721  
14,2,2078.772222  
14,2,1700.744681  
14,2,1500.653226  
14,2,1997.416667  
14,2,4667.409884  
14,2,10823.144860  
14,2,6129.656250  
14,2,2261.897059  
14,2,3476.726064  
14,2,1642.189189  
14,2,3573.780347  
14,2,1988.773585  
14,2,5373.535714  
14,2,3334.994286  
14,2,3751.292614  
14,2,7036.302083  
14,2,3617.560345  
14,2,2981.598958  
14,2,10408.536765  
14,2,2072.755208  
14,2,4009.546875

14,2,6978.083333  
14,2,2128.815341  
14,2,9231.513514  
14,2,10365.788043  
14,2,2625.221311  
14,2,5872.372596  
14,2,1700.026316  
14,2,3951.530612  
14,2,1656.878788  
14,2,5604.278646  
14,2,4760.738462  
14,2,2029.452500  
14,2,3281.647500  
14,2,1816.528571  
14,2,7210.466667  
14,2,6723.543478  
14,2,4829.346591  
14,2,1763.500000  
14,2,4087.169643  
14,2,5779.275000  
14,2,3021.645161  
14,2,3677.542683  
14,2,2290.448529  
14,2,2951.931818  
14,2,3466.406977  
14,2,3617.674419  
14,2,2026.981481  
14,2,2769.692308  
14,2,5881.885714  
14,2,5861.801325  
14,2,3967.935897  
14,2,2027.085890  
14,2,2718.659686  
14,2,8795.609375  
14,2,2042.509804  
14,2,1687.164062  
14,2,1652.500000  
14,2,3613.349138  
14,2,3239.470588  
14,2,2241.802083  
14,2,3579.333333  
14,2,5357.754808  
14,2,7745.306250  
14,2,3508.250000  
14,2,1689.015625  
14,2,9087.937500  
14,2,2906.888889  
14,2,3801.640625  
14,2,5173.059375  
14,2,19190.269608  
14,2,2249.216749  
14,2,5304.304348  
14,2,2172.437500  
14,2,1936.287234  
14,2,2230.916667  
14,2,7075.677083  
14,2,7667.125000  
14,2,3428.139344  
14,2,1859.292857  
14,2,17400.941860  
14,2,2122.673469  
14,2,1983.595745  
14,2,2301.030303  
14,2,3025.976064  
14,2,1997.169811  
14,2,2532.739130

14,2,1709.837209  
14,2,4887.454327  
14,2,3094.432927  
14,2,2460.771341  
14,2,1528.833333  
14,2,4343.795213  
14,2,4672.914286  
14,2,6902.389151  
14,2,1520.780488  
14,2,2025.573864  
14,2,3050.364780  
14,2,2530.875000  
14,2,1871.750000  
14,2,1813.527174  
14,2,4341.850000  
14,2,9249.637097  
14,2,2864.364796  
14,2,3257.722222  
14,2,4518.732143  
14,2,2744.338542  
14,2,5947.259804  
14,2,2987.037500  
14,2,6071.080000  
14,2,2621.156250  
14,2,2213.884146  
14,2,3235.133621  
14,2,10489.737500  
14,2,1534.875000  
14,2,4220.732143  
14,2,2781.342105  
14,2,4211.428571  
14,2,3172.971698  
14,2,5191.398396  
14,2,1950.666667  
14,2,7828.721774  
14,2,1642.128049  
14,2,4816.973684  
14,2,4216.904762  
14,2,4075.515625  
14,2,1668.602273  
14,2,6009.500000  
14,2,1596.852273  
14,2,5394.459375  
14,2,4863.933333  
14,2,2031.446809  
14,2,2207.363636  
14,2,2046.098214  
14,2,4869.446429  
14,2,8312.077206  
14,2,2767.509434  
14,2,3790.046512  
14,2,4757.150000  
14,2,3790.915625  
14,2,2726.616667  
14,2,1540.645833  
14,2,4352.352041  
14,2,4892.041667  
14,2,1899.565217  
14,2,2492.036458  
14,2,1552.401442  
14,2,3442.235000  
14,2,3647.880435  
14,2,5752.846154  
14,2,5774.142857  
14,2,2105.943548  
14,2,1676.343750

14,2,3000.707317  
14,2,4562.850000  
14,2,2451.285714  
14,2,6537.750000  
14,2,13685.527273  
14,2,2100.663690  
14,2,11533.214286  
14,2,1969.530660  
14,2,1796.877551  
14,2,5378.513636  
14,2,6943.738095  
14,2,3829.114286  
14,2,8158.000000  
14,2,25817.395556  
14,2,1798.428571  
14,2,1524.022222  
14,2,1557.955556  
14,2,9218.083333  
14,2,4093.480769  
14,2,2348.683333  
14,2,1982.571429  
14,2,6836.539841  
14,2,2326.586957  
14,2,13450.307692  
14,2,3586.986486  
14,2,3320.845000  
14,2,9915.363636  
14,2,6511.951220  
14,2,2637.842105  
14,2,2150.886364  
14,2,2303.467391  
14,2,2548.815625  
14,2,3538.534722  
14,2,2411.867257  
14,2,2395.319149  
14,2,2333.817416  
14,2,1896.890909  
14,2,2285.621622  
14,2,4810.657895  
14,2,2050.585106  
14,2,2298.062500  
14,2,1729.329268  
14,2,6967.407051  
14,2,4874.904255  
14,2,5027.666667  
14,2,1837.687500  
14,2,4486.628289  
14,2,1659.125000  
14,2,3031.418367  
14,2,6075.320000  
14,2,5920.463415  
14,2,1726.440476  
14,2,6605.734375  
14,2,4066.939655  
14,2,2598.341463  
14,2,4961.796296  
14,2,2212.832402  
14,2,1705.754839  
14,2,3854.770833  
14,2,1511.816667  
14,2,2158.557692  
14,2,1507.569444  
14,2,2808.625000  
14,2,6994.095930  
14,2,1549.354167  
14,2,2601.946809

14,2,3054.920000  
14,2,2239.264151  
14,2,2185.683333  
14,2,3122.622449  
14,2,1709.103365  
14,2,2768.275000  
14,2,3132.815217  
14,2,2458.156915  
14,2,3108.777778  
14,2,1987.714286  
14,2,6637.595588  
14,2,8136.689024  
14,2,1988.315000  
14,2,7020.086957  
14,2,6630.272727  
14,2,1527.002841  
14,2,8832.223214  
14,2,1862.328125  
14,2,2974.659091  
14,2,2721.046196  
14,2,2062.333333  
14,2,5031.831140  
14,2,2002.800000  
14,2,15111.833333  
14,2,2070.381757  
14,2,4977.690476  
14,2,3140.775943  
14,2,2140.826087  
14,2,15525.415865  
14,2,2142.467213  
14,2,38697.929688  
14,2,3394.933824  
14,2,2351.372024  
14,2,7478.367347  
14,2,3097.635135  
14,2,3319.492188  
14,2,4402.806818  
14,2,1804.963889  
14,2,2224.777027  
14,2,2149.937500  
14,2,7716.413043  
14,2,1864.446429  
14,2,2169.518229  
14,2,6355.906716  
14,2,14202.508368  
14,2,1816.826087  
14,2,1559.166667  
14,2,12473.718750  
14,2,3880.579327  
14,2,3491.237245  
14,2,4218.393617  
14,2,4636.548387  
14,2,1616.145833  
14,2,3701.086735  
14,2,7005.563725  
14,2,4526.875000  
14,2,2303.465909  
14,2,4701.885776  
14,2,3638.701705  
14,2,2163.160714  
14,2,3542.283019  
14,2,1768.839744  
14,2,1813.593750  
14,2,2012.184524  
14,2,1598.085526  
14,2,4088.659193

14,2,1844.268817  
14,2,19566.923913  
14,2,1564.663462  
14,2,2496.610169  
14,2,1613.062500  
14,2,2093.207090  
14,2,3470.075000  
14,2,2732.843023  
14,2,1927.307692  
14,2,1618.460366  
14,2,1506.676829  
14,2,5518.340909  
14,2,2333.100000  
14,2,3731.289773  
14,2,7092.639344  
14,2,2888.517500  
14,2,1524.924528  
14,2,2703.750000  
14,2,8121.852941  
14,2,1503.974359  
14,2,2075.608939  
14,2,6472.700980  
14,2,5299.766509  
14,2,1973.614583  
14,2,2908.095930  
14,2,7301.151316  
14,2,7243.872222  
14,2,2912.212766  
14,2,1506.363636  
14,2,4835.475000  
14,2,10091.948529  
14,2,4105.544444  
14,2,1660.858696  
14,2,2128.031977  
14,2,1510.188830  
14,2,4299.547619  
14,2,2336.592391  
14,2,3826.013587  
14,2,2405.896429  
14,2,2230.875000  
14,2,11598.892857  
14,2,2581.755814  
14,2,1733.895408  
14,2,6541.119048  
14,2,2837.523810  
14,2,8411.568548  
14,2,2911.943878  
14,2,1608.000000  
14,2,2614.056604  
14,2,1810.986842  
14,2,2361.172775  
14,2,3365.397436  
14,2,5361.752551  
14,2,3501.448171  
14,2,5273.980000  
14,2,3538.410326  
14,2,6088.800847  
14,2,4654.949324  
14,2,3207.077703  
14,2,3698.382979  
14,2,3033.551829  
14,2,4251.949468  
14,2,5967.367347  
14,2,2672.307692  
14,2,2182.448980  
14,2,4801.968750

14,2,2653.452830  
14,2,2415.120000  
14,2,3467.639535  
14,2,3520.754237  
14,2,5581.210526  
14,2,5803.692308  
14,2,1951.330000  
14,2,3462.714286  
14,2,6286.875000  
14,2,9173.450000  
14,2,2749.389535  
14,2,1721.918367  
14,2,6840.211957  
14,2,1872.510204  
14,2,1911.096774  
14,2,6070.486607  
14,2,2278.677778  
14,2,1675.487805  
14,2,1746.590909  
14,2,14365.840426  
14,2,2542.078571  
14,2,10950.659420  
14,2,2804.638298  
14,2,2300.294355  
14,2,2850.782051  
14,2,2646.513889  
14,2,3777.208333  
14,2,3244.038043  
14,2,2892.636364  
14,2,1961.450000  
14,2,3819.780172  
14,2,2702.941176  
14,2,2328.247093  
14,2,3309.591981  
14,2,1847.461111  
14,2,3580.906250  
14,2,3008.804636  
14,2,2478.685606  
14,2,4974.568878  
14,2,8291.210784  
14,2,6018.360795  
14,2,3448.504098  
14,2,1702.401316  
14,2,6693.303279  
14,2,2768.660714  
14,2,3399.575000  
14,2,1822.078125  
14,2,1803.851064  
14,2,2470.825472  
14,2,1987.610795  
14,2,1560.214286  
14,2,2572.736364  
14,2,3484.172775  
14,2,2492.067039  
14,2,1810.000000  
14,2,2020.157895  
14,2,2616.333333  
14,2,8518.943005  
14,2,2207.554913  
14,2,2162.170732  
14,2,2583.294944  
14,2,4335.845588  
14,2,16762.729167  
14,2,3897.625000  
14,2,8450.000000  
14,2,3319.430000

14,2,5158.612981  
14,2,6887.069767  
14,2,5624.967949  
14,2,1812.371795  
14,2,1641.670000  
14,2,1635.062500  
14,2,2177.600000  
14,2,8558.433824  
14,2,1672.000000  
14,2,3503.425000  
14,2,22698.875000  
14,2,3211.857143  
14,2,3022.768750  
14,2,3046.532609  
14,2,8403.404255  
14,2,3574.055085  
14,2,4044.036058  
14,2,9923.719907  
14,2,1879.193182  
14,2,2252.481567  
14,2,4587.876000  
14,2,8048.224359  
14,2,4227.414063  
14,2,2005.378378  
14,2,2076.025000  
14,2,8487.133333  
14,2,5207.831081  
14,2,15305.961538  
14,2,4230.511905  
14,2,4710.325581  
14,2,3355.013514  
14,2,4688.785714  
14,2,4018.930233  
14,2,8363.437500  
14,2,1515.450000  
14,2,2988.938776  
14,2,3350.236111  
14,2,1971.834906  
14,2,1510.921296  
14,2,3067.218750  
14,2,7085.324324  
14,2,6206.196429  
14,2,16511.750000  
14,2,3610.139423  
14,2,2314.625000  
14,2,1990.460526  
14,2,7616.171875  
14,2,3679.449468  
14,2,3109.000000  
14,2,2113.421384  
14,2,1783.744565  
14,2,9832.696429  
14,2,2525.548387  
14,2,2880.518229  
14,2,1868.688830  
14,2,3978.344444  
14,2,10400.718750  
14,2,4524.910714  
14,2,2146.560345  
14,2,2899.604167  
14,2,9766.520833  
14,2,1808.580000  
14,2,1570.986842  
14,2,1907.008523  
14,2,7727.182692  
14,2,15458.140625

14,2,4859.002551  
14,2,3279.963942  
14,2,2233.875000  
14,2,9294.367925  
14,2,1511.428962  
14,2,5181.346939  
14,2,3916.040000  
14,2,1586.250000  
14,2,7492.176829  
14,2,1522.204545  
14,2,8398.133333  
14,2,6511.953125  
14,2,2278.783333  
14,2,2557.725000  
14,2,1717.701183  
14,2,4968.669492  
14,2,3975.802239  
14,2,2548.521739  
14,2,4283.478261  
14,2,4994.312500  
14,2,135956.771277  
14,2,1637.147959  
14,2,7953.274390  
14,2,2727.475000  
14,2,4433.811047  
14,2,2167.957317  
14,2,6251.023256  
14,2,2251.276786  
14,2,2017.458333  
14,2,9067.805085  
14,2,4582.513158  
14,2,1941.500000  
14,2,1542.446809  
14,2,8994.704545  
14,2,7789.325301  
14,2,2602.563380  
14,2,5600.586111  
14,2,9911.479167  
14,2,2045.494681  
14,2,2708.788194  
14,2,2444.566667  
14,2,2948.292763  
14,2,1636.409091  
14,2,1904.250000  
14,2,10572.892857  
14,2,3020.937500  
14,2,1964.318182  
14,2,4300.666667  
14,2,2690.050000  
14,2,2799.923077  
14,2,7635.095588  
14,2,4454.097368  
14,2,11541.650190  
14,2,4073.244444  
14,2,5764.556122  
14,2,1885.397959  
14,2,4972.268519  
14,2,2156.585227  
14,2,2452.214286  
14,2,2058.104651  
14,2,1790.364130  
14,2,12236.422619  
14,2,1774.275510  
14,2,7703.750000  
14,2,13220.310976  
14,2,4366.860577

14,2,5058.645349  
14,2,2001.169355  
14,2,3234.500000  
14,2,10586.160714  
14,2,4117.235465  
14,2,1964.417453  
14,2,2884.720745  
14,2,15384.820755  
14,2,8029.882353  
14,2,2905.764423  
14,2,7460.908163  
14,2,4292.825000  
14,2,2171.538462  
14,2,2097.842857  
14,2,1708.632653  
14,2,2469.489130  
14,2,2885.849265  
14,2,4473.564246  
14,2,1722.089286  
14,2,3172.000000  
14,2,9649.052500  
14,2,1962.944444  
14,2,9879.600000  
14,2,2213.294811  
14,2,3645.401163  
14,2,6207.470588  
14,2,2318.416667  
14,2,3044.837500  
14,2,3846.528646  
14,2,13202.833333  
14,2,5639.875000  
14,2,3139.222826  
14,2,6242.732143  
14,2,3156.404018  
14,2,2372.170732  
14,2,10201.950521  
14,2,2533.000000  
14,2,1583.744681  
14,2,1646.347973  
14,2,1705.682927  
14,2,2993.600000  
14,2,2666.681122  
14,2,2240.293269  
14,2,5917.176020  
14,2,2071.922297  
14,2,2677.036199  
14,2,6364.157895  
14,2,2642.133333  
14,2,8243.932292  
14,2,3098.340278  
14,2,3254.582386  
14,2,22305.500000  
14,2,1861.781250  
14,2,1663.520000  
14,2,2795.814583  
14,2,4049.091346  
14,2,2752.812500  
14,2,2764.670732  
14,2,1626.415541  
14,2,3893.075000  
14,2,2426.304348  
14,2,6953.864583  
14,2,2643.668919  
14,2,1549.102273  
14,2,2949.325472  
14,2,4382.832317

14,2,3082.205189  
14,2,2378.663690  
14,2,14888.934211  
14,2,1589.851190  
14,2,2784.804348  
14,2,1920.500000  
14,2,4091.447917  
14,2,2129.291667  
14,2,15977.710000  
14,2,3209.108696  
14,2,4898.000000  
14,2,4959.199519  
14,2,3413.473404  
14,2,2328.521739  
14,2,10880.908854  
14,2,2647.552083  
14,2,2059.407895  
14,2,1583.843750  
14,2,3999.052764  
14,2,12002.597826  
14,2,2588.939394  
14,2,154645.036765  
14,2,2780.688889  
14,2,2690.255814  
14,2,5634.588068  
14,2,2963.595238  
14,2,3306.816176  
14,2,1558.457143  
14,2,9354.159836  
14,2,3092.527778  
14,2,2010.125000  
14,2,1723.971154  
14,2,2244.808333  
14,2,5928.447368  
14,2,2376.880102  
14,2,2498.250000  
14,2,2132.702206  
14,2,8092.571429  
14,2,28582.395210  
14,2,1894.902439  
14,2,1745.948529  
14,2,2313.948718  
14,2,7154.754902  
14,2,1514.272727  
14,2,2886.022222  
14,2,2672.960000  
14,2,2003.148148  
14,2,2773.204787  
14,2,1939.849138  
14,2,3057.228448  
14,2,1973.963889  
14,2,7759.462025  
14,2,2567.297030  
14,2,3827.869565  
14,2,12892.738971  
14,2,4672.253394  
14,2,3562.828947  
14,2,4139.187500  
14,2,2288.250000  
14,2,2807.880435  
14,2,5550.710227  
14,2,2992.695000  
14,2,12261.768868  
14,2,2224.457447  
14,2,4520.209459  
14,2,1817.250000

14,2,3342.113208  
14,2,5486.718593  
14,2,2081.543590  
14,2,8632.924528  
14,2,1814.846154  
14,2,2351.683333  
14,2,2101.920213  
14,2,1598.757576  
14,2,1870.558140  
14,2,3131.058140  
14,2,1622.512195  
14,2,6673.833333  
14,2,1639.625000  
14,2,5799.228659  
14,2,1581.822368  
14,2,174032.289474  
14,2,2422.006944  
14,2,2370.304054  
14,2,1950.462500  
14,2,2029.027027  
14,2,1843.267500  
14,2,4042.168182  
14,2,1898.423077  
14,2,1949.700000  
14,2,13445.394531  
14,2,2423.078341  
14,2,10445.541176  
14,2,2522.414286  
14,2,2063.693750  
14,2,7301.116279  
14,2,1520.139286  
14,2,1857.098404  
14,2,3385.762712  
14,2,1704.253049  
14,2,1538.621951  
14,2,4269.866492  
14,2,1799.069767  
14,2,3517.360577  
14,2,1649.282895  
14,2,10026.857143  
14,2,4252.218182  
14,2,2537.989362  
14,2,2396.967742  
14,2,3835.540761  
14,2,1763.244898  
14,2,2018.162162  
14,2,3656.452830  
14,2,1651.352041  
14,2,6931.171610  
14,2,5307.370370  
14,2,3110.970745  
14,2,11576.395161  
14,2,2270.548780  
14,2,3016.024390  
14,2,1902.540541  
14,2,3472.000000  
14,2,6844.068182  
14,2,2203.547872  
14,2,14290.037500  
14,2,3093.912736  
14,2,1838.007143  
14,2,1668.886228  
14,2,2476.237805  
14,2,3312.500000  
14,2,1746.382022  
14,2,2571.781250

14,2,3054.079787  
14,2,10172.000000  
14,2,2300.771429  
14,2,2278.536585  
14,2,3667.500000  
14,2,3485.566860  
14,2,5192.343750  
14,2,2721.325581  
14,2,1570.854545  
14,2,2697.111111  
14,2,1620.518750  
14,2,1539.401042  
14,2,2676.272727  
14,2,6229.367925  
14,2,2054.907489  
14,2,1590.792683  
14,2,2058.750000  
14,2,4596.024510  
14,2,1985.333333  
14,2,8100.300000  
14,2,2103.127273  
14,2,1814.146341  
14,2,1939.989796  
14,2,9760.913043  
14,2,3457.234375  
14,2,3182.380000  
14,2,2300.658537  
14,2,1626.156250  
14,2,6141.938776  
14,2,4176.226744  
14,2,1918.557292  
14,2,3483.553191  
14,2,1789.536184  
14,2,13722.865854  
14,2,8385.006098  
14,2,10636.333333  
14,2,2191.500000  
14,2,2004.728261  
14,2,2930.400000  
14,2,2069.818182  
14,2,7149.826087  
14,2,5757.953488  
14,2,1824.635870  
14,2,7120.312500  
14,2,2185.082317  
14,2,2331.971154  
14,2,3063.550926  
14,2,2795.482143  
14,2,5285.591463  
14,2,7884.851562  
14,2,2995.811170  
14,2,1749.300000  
14,2,1626.919643  
14,2,1635.637500  
14,2,3241.211538  
14,2,1526.812500  
14,2,6219.117647  
14,2,4481.666667  
14,2,2984.152439  
14,2,2212.030660  
14,2,1980.946809  
14,2,3823.666667  
14,2,2003.622596  
14,2,55996.121324  
14,2,3594.773026  
14,2,3355.463235

14,2,2977.047872  
14,2,1938.333333  
14,2,10914.544811  
14,2,10875.192308  
14,2,12359.662791  
14,2,1896.181818  
14,2,1982.676630  
14,2,3474.423077  
14,2,2139.741477  
14,2,1925.488095  
14,2,2652.008929  
14,2,1500.936170  
14,2,2062.971429  
14,2,2218.114754  
14,2,2619.662577  
14,2,3618.850000  
14,2,3655.006410  
14,2,1654.544271  
14,2,3323.024194  
14,2,1795.377717  
14,2,1591.540441  
14,2,6090.305556  
14,2,5155.747283  
14,2,2991.185976  
14,2,9611.085000  
14,2,3919.883929  
14,2,1515.319149  
14,2,18462.294118  
14,2,1551.172872  
14,2,2660.921429  
14,2,2025.086957  
14,2,5573.675676  
14,2,11480.018868  
14,2,55953.111702  
14,2,9139.905660  
14,2,1949.333333  
14,2,3136.176471  
14,2,1570.281250  
14,2,3462.358491  
14,2,2495.292553  
14,2,5260.918605  
14,2,3837.033333  
14,2,3630.710227  
14,2,15176.466837  
14,2,3016.770833  
14,2,1777.872222  
14,2,1571.116667  
14,2,1551.172500  
14,2,2598.829545  
14,2,1584.169872  
14,2,4969.350000  
14,2,2660.670455  
14,2,2274.891304  
14,2,4513.095238  
14,2,3206.947917  
14,2,1771.746875  
14,2,1682.000000  
14,2,11226.588517  
14,2,6137.625000  
14,2,4872.966667  
14,2,2279.783537  
14,2,3096.084239  
14,2,7256.279412  
14,2,2069.388889  
14,2,6116.434783  
14,2,2134.400000

14,2,1785.114286  
14,2,3076.215686  
14,2,6829.531977  
14,2,2922.625000  
14,2,4855.528302  
14,2,3120.742647  
14,2,1851.458333  
14,2,8170.368750  
14,2,2843.029851  
14,2,5605.120763  
14,2,4048.000000  
14,2,6051.089506  
14,2,36604.448052  
14,2,5064.159722  
14,2,6668.397143  
14,2,13744.607143  
14,2,2359.780488  
14,2,2187.440476  
14,2,2809.951220  
14,2,10049.500000  
14,2,4384.828125  
14,2,5173.744318  
14,2,1564.524390  
14,2,5663.937500  
14,2,4523.437500  
14,2,2408.750000  
14,2,3474.420139  
14,2,5173.391667  
14,2,5585.780000  
14,2,2954.122159  
14,2,2245.265152  
14,2,5045.674419  
14,2,1575.961806  
14,2,3903.812500  
14,2,2082.997449  
14,2,22082.957447  
14,2,1620.196429  
14,2,2944.897436  
14,2,1903.280405  
14,2,2057.585000  
14,2,10564.376623  
14,2,2811.242105  
14,2,1665.000000  
14,2,1639.142857  
14,2,2398.166667  
14,2,2608.974359  
14,2,6307.992857  
14,2,2847.948529  
14,2,2177.000000  
14,2,4406.920000  
14,2,7523.461538  
14,2,2665.197368  
14,2,2025.537037  
14,2,2321.224490  
14,2,1668.440217  
14,2,3220.742021  
14,2,5897.695312  
14,2,1537.570455  
14,2,1671.044271  
14,2,1786.609694  
14,2,2587.257075  
14,2,3032.790323  
14,2,10755.003049  
14,2,6109.916667  
14,2,2780.617021  
14,2,1872.350000

14,2,9444.258333  
14,2,1503.093023  
14,2,2181.067935  
14,2,4509.374359  
14,2,5046.814570  
14,2,7321.085714  
14,2,3777.902439  
14,2,1602.181818  
14,2,6102.234694  
14,2,3574.450000  
14,2,2587.258152  
14,2,3693.230263  
14,2,1525.255814  
14,2,1886.354167  
14,2,5459.936111  
14,2,4102.400000  
14,2,3773.500000  
14,2,2148.500000  
14,2,1510.369565  
14,2,6322.896739  
14,2,2798.458333  
14,2,3208.809783  
14,2,8858.313830  
14,2,9831.424107  
14,2,6180.935268  
14,2,6914.511628  
14,2,4575.207447  
14,2,1546.467949  
14,2,3429.178125  
14,2,5513.663043  
14,2,9867.183824  
14,2,5672.812500  
14,2,6062.553571  
14,2,4607.500000  
14,2,2605.220930  
14,2,2941.400000  
14,2,5235.326531  
14,2,2493.409483  
14,2,2323.012500  
14,2,49959.088889  
14,2,3110.347826  
14,2,7932.813830  
14,2,3937.189904  
14,2,4685.368056  
14,2,2003.357143  
14,2,2231.186170  
14,2,4843.633721  
14,2,5817.028846  
14,2,1634.610465  
14,2,7290.706731  
14,2,1735.538462  
14,2,5266.604167  
14,2,2927.400000  
14,2,1901.151786  
14,2,4915.461538  
14,2,4612.045918  
14,2,3782.242424  
14,2,4726.242647  
14,2,5032.000000  
14,2,4600.150000  
14,2,8723.982456  
14,2,2085.641026  
14,2,2104.468750  
14,2,3329.277500  
14,2,2073.530612  
14,2,2870.782609

14,2,2503.372093  
14,2,2328.469512  
14,2,9923.659375  
14,2,2368.806818  
14,2,9057.111111  
14,2,2877.851064  
14,2,3144.714286  
14,2,2107.083333  
14,2,7382.668605  
14,2,2405.125000  
14,2,5828.973214  
14,2,1916.943750  
14,2,1509.964286  
14,2,16728.463889  
14,2,1737.524457  
14,2,3649.288462  
14,2,2912.710227  
14,2,3520.187500  
14,2,1650.548780  
14,2,3523.014423  
14,2,2373.500000  
14,2,2035.201087  
14,2,2395.228571  
14,2,2002.200000  
14,2,4058.766447  
14,2,2015.061111  
14,2,1935.242500  
14,2,2275.523649  
14,2,2018.227273  
14,2,7726.647500  
14,2,6054.539894  
14,2,2789.366071  
14,2,1840.700000  
14,2,2589.598837  
14,2,18629.429688  
14,2,6097.143443  
14,2,2775.908537  
14,2,6801.090909  
14,2,1699.923077  
14,2,1967.481771  
14,2,2947.421053  
14,2,1677.983696  
14,2,4026.887097  
14,2,3365.291667  
14,2,1990.396104  
14,2,2176.241206  
14,2,1755.390244  
14,2,1955.415094  
14,2,8669.773585  
14,2,1658.227273  
14,2,3861.906250  
14,2,2432.000000  
14,2,2445.417553  
14,2,9873.500000  
14,2,2220.750000  
14,2,1663.517241  
14,2,6647.400000  
14,2,2907.940476  
14,2,1765.485549  
14,2,4718.614583  
14,2,3398.917683  
14,2,1520.067308  
14,2,5553.808594  
14,2,1994.702128  
14,2,2075.887500  
14,2,4946.911765

14,2,5601.395833  
14,2,2147.076923  
14,2,6714.986842  
14,2,4969.010638  
14,2,5539.688073  
14,2,2152.528846  
14,2,1608.930233  
14,2,4818.434896  
14,2,1807.060268  
14,2,8935.377551  
14,2,1555.945946  
14,2,1996.060096  
14,2,6699.075472  
14,2,1895.310526  
14,2,3049.573298  
14,2,4381.736842  
14,2,3492.594595  
14,2,4116.777778  
14,2,23171.500000  
14,2,3920.125000  
14,2,3708.174020  
14,2,1899.457143  
14,2,2957.505952  
14,2,1980.676471  
14,2,1901.114130  
14,2,5779.412500  
14,2,2611.021277  
14,2,16394.826389  
14,2,9505.651163  
14,2,4769.228814  
14,2,1635.264205  
14,2,6846.377193  
14,2,6215.567839  
14,2,1932.672297  
14,2,4630.927885  
14,2,7777.162791  
14,2,4308.452830  
14,2,1581.625000  
14,2,2807.690000  
14,2,10459.307229  
14,2,3861.835366  
14,2,2142.500000  
14,2,13269.420455  
14,2,3480.114583  
14,2,5826.039604  
14,2,3067.138554  
14,2,2804.036765  
14,2,2105.210227  
14,2,7747.583333  
14,2,4328.540698  
14,2,7608.469828  
14,2,1565.166667  
14,2,3059.803571  
14,2,6123.460000  
14,2,3557.250000  
14,2,5649.182692  
14,2,4178.300000  
14,2,1978.119565  
14,2,1897.223684  
14,2,6279.077586  
14,2,15266.104839  
14,2,2836.957447  
14,2,8061.062500  
14,2,3333.703125  
14,2,2715.912791  
14,2,4628.966981

14,2,2826.555556  
14,2,2802.157609  
14,2,3723.284091  
14,2,2920.625000  
14,2,3564.674419  
14,2,7976.995098  
14,2,2382.086111  
14,2,9495.161765  
14,2,1755.310526  
14,2,4481.189189  
14,2,1817.033163  
14,2,4481.295000  
14,2,4050.636029  
14,2,2710.201531  
14,2,5028.467105  
14,2,7596.954545  
14,2,1886.720395  
14,2,4812.832237  
14,2,3575.122340  
14,2,3841.680556  
14,2,3344.153409  
14,2,1671.357143  
14,2,2126.364583  
14,2,1830.823980  
14,2,2320.412791  
14,2,4119.321429  
14,2,9050.541667  
14,2,2350.821429  
14,2,6128.868243  
14,2,2576.652174  
14,2,1768.944079  
14,2,3288.503472  
14,2,3555.480769  
14,2,4924.946429  
14,2,5518.959302  
14,2,2268.170732  
14,2,2287.103571  
14,2,4010.023026  
14,2,2616.677419  
14,2,2945.761364  
14,2,3031.340000  
14,2,3252.341463  
14,2,1614.005848  
14,2,2756.656977  
14,2,5974.183673  
14,2,2523.805000  
14,2,2679.217391  
14,2,6451.910714  
14,2,2559.487500  
14,2,11317.494186  
14,2,2247.577381  
14,2,3276.452128  
14,2,20289.139535  
14,2,2683.189189  
14,2,3956.926829  
14,2,2023.106132  
14,2,5581.481707  
14,2,2707.692568  
14,2,1550.850610  
14,2,1643.609375  
14,2,1525.372093  
14,2,4106.796053  
14,2,4779.851351  
14,2,2434.418605  
14,2,1830.173469  
14,2,3793.625000

14,2,8179.000000  
14,2,1871.987500  
14,2,3275.341463  
14,2,2583.281977  
14,2,1507.536585  
14,2,1660.661111  
14,2,4866.395349  
14,2,3970.185567  
14,2,2817.984375  
14,2,4136.250000  
14,2,2828.130682  
14,2,6983.781250  
14,2,2658.416667  
14,2,2854.369444  
14,2,1662.872024  
14,2,3237.019022  
14,2,1884.572864  
14,2,2258.630000  
14,2,5623.182692  
14,2,7430.338983  
14,2,2088.179245  
14,2,3203.000000  
14,2,1850.928571  
14,2,1716.223837  
14,2,3096.218750  
14,2,1661.109756  
14,2,1799.240000  
14,2,1890.750000  
14,2,2594.750000  
14,2,82264.923077  
14,2,1511.733696  
14,2,4761.349138  
14,2,6371.145000  
14,2,2257.060185  
14,2,1563.032258  
14,2,4712.792818  
14,2,6581.015625  
14,2,1794.391304  
14,2,2687.021277  
14,2,5765.140000  
14,2,2711.137500  
14,2,2654.738095  
14,2,2536.510204  
14,2,6109.226190  
14,2,2973.979592  
14,2,2189.038462  
14,2,3579.700581  
14,2,4343.765306  
14,2,2560.205882  
14,2,3196.375000  
14,2,1742.433140  
14,2,2682.650000  
14,2,2038.655488  
14,2,8891.860577  
14,2,2998.461538  
14,2,5504.600000  
14,2,3646.220588  
14,2,2824.380952  
14,2,4194.539062  
14,2,1989.400000  
14,2,1661.482143  
14,2,1680.170213  
14,2,4582.922414  
14,2,6151.427885  
14,2,3673.375000  
14,2,1663.203125

14,2,8146.714286  
14,2,1645.447368  
14,2,2639.617347  
14,2,3043.550000  
14,2,1946.464286  
14,2,2240.364130  
14,2,4390.291667  
14,2,5881.455882  
14,2,2026.638158  
14,2,2176.795918  
14,2,3069.427778  
14,2,1603.340426  
14,2,1710.851064  
14,2,10695.287234  
14,2,4086.241071  
14,2,2920.458333  
14,2,6277.674419  
14,2,11771.895000  
14,2,7923.473684  
14,2,19060.104508  
14,2,2505.916667  
14,2,1725.813830  
14,2,3768.071429  
14,2,2526.329787  
14,2,1626.775000  
14,2,6265.562500  
14,2,7789.735465  
14,2,10293.551020  
14,2,3177.097765  
14,2,2754.519886  
14,2,1774.682500  
14,2,4432.753049  
14,2,4801.755208  
14,2,2665.351351  
14,2,2388.282895  
14,2,1852.777778  
14,2,8763.711111  
14,2,3388.989362  
14,2,7505.189024  
14,2,2534.764706  
14,2,2978.980556  
14,2,2530.887097  
14,2,8307.312500  
14,2,10651.995098  
14,2,7120.760417  
14,2,1821.328125  
14,2,2108.738636  
14,2,4932.312500  
14,2,2053.085106  
14,2,3827.290541  
14,2,2044.982955  
14,2,3610.655488  
14,2,9505.406250  
14,2,1834.442308  
14,2,1735.613095  
14,2,4155.811170  
14,2,1754.561702  
14,2,4216.605769  
14,2,2565.931280  
14,2,9782.534483  
14,2,1843.000000  
14,2,1656.702586  
14,2,5392.777778  
14,2,2351.468085  
14,2,5043.542683  
14,2,1735.089286

14,2,3526.734694  
14,2,4720.182692  
14,2,7743.370000  
14,2,1737.710526  
14,2,5011.150862  
14,2,15256.951923  
14,2,1539.391509  
14,2,4144.968750  
14,2,3398.473404  
14,2,2466.625000  
14,2,2026.187500  
14,2,5565.014706  
14,2,1806.734375  
14,2,2079.235294  
14,2,1836.369565  
14,2,4677.500000  
14,2,4679.980769  
14,2,2142.470588  
14,2,1552.037500  
14,2,8367.436170  
14,2,1781.867647  
14,2,3016.441860  
14,2,6714.928571  
14,2,6946.000000  
14,2,2565.295652  
14,2,2015.695312  
14,2,3196.591837  
14,2,5109.553571  
14,2,2654.420000  
14,2,1659.806452  
14,2,4507.529891  
14,2,4343.764286  
14,2,1994.538265  
14,2,2040.511628  
14,2,3733.588235  
14,2,3718.256098  
14,2,3002.778846  
14,2,5530.655488  
14,2,1571.602041  
14,2,1597.216981  
14,2,3901.947917  
14,2,19570.986111  
14,2,6157.734043  
14,2,3572.291667  
14,2,5539.717391  
14,2,5145.486111  
14,2,7100.812500  
14,2,5589.258475  
14,2,1737.565789  
14,2,2031.312500  
14,2,4997.288462  
14,2,2339.426829  
14,2,6358.732323  
14,2,5506.938830  
14,2,2832.029891  
14,2,3805.450000  
14,2,5922.486111  
14,2,5347.786058  
14,2,2930.099432  
14,2,3544.673469  
14,2,2082.250000  
14,2,3327.666667  
14,2,47813.576613  
14,2,2305.375000  
14,2,2409.670732  
14,2,2139.122340

14,2,3675.483553  
14,2,1597.401596  
14,2,2516.839779  
14,2,4471.465278  
14,2,1512.727273  
14,2,2056.352941  
14,2,2399.375000  
14,2,3506.265306  
14,2,2013.380435  
14,2,7462.949468  
14,2,3195.431818  
14,2,1819.318182  
14,2,4676.147321  
14,2,1716.863636  
14,2,2010.429878  
14,2,1641.180000  
14,2,2999.515625  
14,2,4102.210784  
14,2,3743.335366  
14,2,1812.500000  
14,2,2333.717105  
14,2,2625.182203  
14,2,4496.857143  
14,2,5473.677686  
14,2,1809.265823  
14,2,14350.884615  
14,2,5189.078947  
14,2,8036.000000  
14,2,3650.579268  
14,2,1545.434783  
14,2,5088.651596  
14,2,1825.696809  
14,2,1739.410326  
14,2,5168.125000  
14,2,14364.776316  
14,2,7827.447368  
14,2,7066.440678  
14,2,1818.913462  
14,2,14213.063953  
14,2,4063.628906  
14,2,3937.423645  
14,2,2507.698675  
14,2,6556.577957  
14,2,2249.921429  
14,2,2673.250000  
14,2,2165.418605  
14,2,3404.600000  
14,2,1569.672794  
14,2,2015.173077  
14,2,2119.843750  
14,2,2670.500000  
14,2,1985.950980  
14,2,2731.739583  
14,2,1704.625000  
14,2,2507.953488  
14,2,1670.964674  
14,2,2029.763889  
14,2,1541.988636  
14,2,33262.658537  
14,2,3767.941176  
14,2,6091.125000  
14,2,5281.656250  
14,2,2138.057692  
14,2,1912.521739  
14,2,2368.921053  
14,2,2176.716216

14,2,2699.529070  
14,2,7337.348214  
14,2,3597.000000  
14,2,5074.028846  
14,2,2126.317073  
14,2,3357.328488  
14,2,2602.236842  
14,2,2551.980263  
14,2,2288.715686  
14,2,8522.368421  
14,2,2561.960000  
14,2,1991.266667  
14,2,3755.812500  
14,2,2743.227273  
14,2,6972.903226  
14,2,4777.625000  
14,2,1801.638889  
14,2,10392.132653  
14,2,1929.389535  
14,2,1785.687500  
14,2,8310.285714  
14,2,3823.364130  
14,2,2012.451220  
14,2,9384.041667  
14,2,4738.418750  
14,2,4971.992188  
14,2,4490.383721  
14,2,2607.648649  
14,2,1523.810897  
14,2,2291.138298  
14,2,2420.151163  
14,2,1816.236842  
14,2,2160.789474  
14,2,2180.812500  
14,2,9436.071429  
14,2,3898.375000  
14,2,3254.875000  
14,2,3667.091518  
14,2,1678.250000  
14,2,3394.000000  
14,2,3803.673077  
14,2,3043.723837  
14,2,8221.258242  
14,2,2887.624224  
14,2,1819.212838  
14,2,7618.721154  
14,2,3451.119681  
14,2,3130.875000  
14,2,1836.416667  
14,2,7624.000000  
14,2,4237.398649  
14,2,8410.912500  
14,2,4623.371795  
14,2,2345.081081  
14,2,2107.025000  
14,2,1637.067568  
14,2,3529.494681  
14,2,1602.875000  
14,2,4052.100000  
14,2,1921.179487  
14,2,5374.663462  
14,2,1668.421053  
14,2,11883.853846  
14,2,38495.071429  
14,2,1758.666667  
14,2,8827.718750

14,2,2039.908088  
14,2,4089.000000  
14,2,1648.500000  
14,2,4445.051630  
14,2,1757.437500  
14,2,3910.812500  
14,2,3839.800000  
14,2,2460.894737  
14,2,2793.116071  
14,2,1608.076087  
14,2,7600.511628  
14,2,1607.531250  
14,2,2128.103774  
14,2,3588.146341  
14,2,6798.260870  
14,2,5057.054054  
14,2,3466.514706  
14,2,1992.700000  
14,2,4603.320312  
14,2,3193.567130  
14,2,1573.121711  
14,2,2212.394886  
14,2,3485.250000  
14,2,3612.133562  
14,2,5726.294643  
14,2,2703.108974  
14,2,2519.683036  
14,2,1630.548780  
14,2,1586.250000  
14,2,2463.567500  
14,2,3046.569444  
14,2,1650.352941  
14,2,1816.789474  
14,2,2847.761628  
14,2,3078.994764  
14,2,6163.989362  
14,2,9115.910714  
14,2,1836.044355  
14,2,1579.848684  
14,2,5340.937500  
14,2,2074.009804  
14,2,2470.901596  
14,2,61008.292683  
14,2,2942.895000  
14,2,3476.792683  
14,2,3269.125000  
14,2,4260.772727  
14,2,2041.791667  
14,2,2313.375000  
14,2,2738.621622  
14,2,2212.807500  
14,2,1634.797619  
14,2,2550.578488  
14,2,3251.913136  
14,2,4034.272500  
14,2,2265.384615  
14,2,3478.812500  
14,2,2326.425000  
14,2,3045.595745  
14,2,2000.217391  
14,2,3281.872449  
14,2,1737.122159  
14,2,3816.909375  
14,2,3658.383721  
14,2,2028.037736  
14,2,1851.700000

14,2,1889.148148  
14,2,1785.821429  
14,2,3115.428571  
14,2,4166.175676  
14,2,6781.328125  
14,2,2866.208333  
14,2,5099.000000  
14,2,7942.921053  
14,2,1653.961806  
14,2,2766.351064  
14,2,2643.263298  
14,2,3817.554348  
14,2,4600.820000  
14,2,3356.068182  
14,2,2791.772727  
14,2,2648.561224  
14,2,3070.202381  
14,2,4359.985714  
14,2,3583.067935  
14,2,3206.739583  
14,2,1547.144608  
14,2,3036.790698  
14,2,1799.866071  
14,2,4522.914773  
14,2,38296.096591  
14,2,5393.076923  
14,2,3716.561224  
14,2,1982.322034  
14,2,3876.392405  
14,2,1912.170455  
14,2,5415.154412  
14,2,3492.196429  
14,2,9366.930233  
14,2,1944.169271  
14,2,6620.026316  
14,2,11475.323171  
14,2,1722.243750  
14,2,4021.167553  
14,2,4765.900000  
14,2,2515.875000  
14,2,8206.692308  
14,2,4086.000000  
14,2,1977.889286  
14,2,5736.071121  
14,2,1589.774554  
14,2,3835.170455  
14,2,2458.209677  
14,2,5377.772059  
14,2,4193.177326  
14,2,1832.702381  
14,2,5924.744186  
14,2,3605.231481  
14,2,1712.018868  
14,2,2465.500000  
14,2,2690.789474  
14,2,2356.005208  
14,2,1734.125000  
14,2,2416.359375  
14,2,10529.031250  
14,2,8329.775974  
14,2,1536.125000  
14,2,1640.675676  
14,2,5015.720930  
14,2,1561.169811  
14,2,1539.720588  
14,2,1982.835366

14,2,2127.195652  
14,2,6194.792453  
14,2,1552.631098  
14,2,2299.334184  
14,2,4493.909722  
14,2,9922.884615  
14,2,4237.516304  
14,2,10560.283654  
14,2,2150.785714  
14,2,2350.538462  
14,2,2948.947368  
14,2,3943.666667  
14,2,1553.150000  
14,2,3313.470930  
14,2,4371.500000  
14,2,8341.505556  
14,2,4507.949074  
14,2,4208.459302  
14,2,3752.843085  
14,2,2534.845000  
14,2,2726.810345  
14,2,2835.453125  
14,2,4183.125000  
14,2,1663.616279  
14,2,9443.438776  
14,2,12386.477679  
14,2,1772.702500  
14,2,1951.966667  
14,2,5474.801020  
14,2,2763.536585  
14,2,1836.511111  
14,2,7318.000000  
14,2,1540.158163  
14,2,3463.160326  
14,2,10784.740586  
14,2,3589.490066  
14,2,3072.041667  
14,2,2511.368750  
14,2,1817.218750  
14,2,2461.132979  
14,2,3253.850000  
14,2,3508.061798  
14,2,2458.575342  
14,2,3319.971910  
14,2,2026.946429  
14,2,9120.337500  
14,2,1949.526316  
14,2,2184.625000  
14,2,4872.976562  
14,2,1703.536458  
14,2,3922.307292  
14,2,2359.940909  
14,2,3891.285714  
14,2,2763.783654  
14,2,6113.668269  
14,2,2544.755814  
14,2,2885.610000  
14,2,4144.000000  
14,2,3011.726744  
14,2,2506.753049  
14,2,7481.619444  
14,2,2550.210526  
14,2,8733.288462  
14,2,1801.391667  
14,2,2648.910714  
14,2,4177.611111

14,2,4402.048193  
14,2,4905.051724  
14,2,10498.282051  
14,2,1582.784722  
14,2,1801.625000  
14,2,2661.774510  
14,2,4479.062500  
14,2,1793.738095  
14,2,1675.045455  
14,2,3225.951087  
14,2,4198.562500  
14,2,1511.411765  
14,2,2687.914352  
14,2,3342.528689  
14,2,2208.566667  
14,2,4407.960526  
14,2,15289.300000  
14,2,1967.900524  
14,2,1686.203390  
14,2,6340.311224  
14,2,6440.165909  
14,2,2052.896552  
14,2,2936.486842  
14,2,6706.608696  
14,2,5694.342949  
14,2,6230.987179  
14,2,6804.160714  
14,2,1672.488372  
14,2,3367.650000  
14,2,6497.585366  
14,2,2400.634615  
14,2,3462.023256  
14,2,3174.064516  
14,2,6477.353261  
14,2,2130.150000  
14,2,2830.817857  
14,2,2847.007979  
14,2,4329.295918  
14,2,2428.915541  
14,2,7345.157895  
14,2,2222.418919  
14,2,1759.773305  
14,2,4007.513966  
14,2,3079.976744  
14,2,2211.550000  
14,2,6830.543478  
14,2,2233.670000  
14,2,10730.057692  
14,2,18983.477941  
14,2,2075.247159  
14,2,4142.711538  
14,2,7370.488372  
14,2,4192.263158  
14,2,1857.545673  
14,2,5570.322222  
14,2,1919.644737  
14,2,3005.981818  
14,2,1854.812500  
14,2,3615.428571  
14,2,3705.804878  
14,2,1869.048780  
14,2,1556.455882  
14,2,1837.947674  
14,2,2318.250000  
14,2,5006.940217  
14,2,1514.151316

14,2,8294.142857  
14,2,4624.713542  
14,2,2092.791667  
14,2,1783.277778  
14,2,1637.793478  
14,2,2548.153061  
14,2,3808.190476  
14,2,24147.096154  
14,2,2808.092262  
14,2,3788.341216  
14,2,2482.538462  
14,2,1849.444444  
14,2,2402.293269  
14,2,2550.484043  
14,2,2285.750000  
14,2,2136.826705  
14,2,2606.939189  
14,2,4511.790179  
14,2,8237.276596  
14,2,3703.203125  
14,2,3534.008152  
14,2,3441.487805  
14,2,7771.773810  
14,2,2783.509615  
14,2,2355.319149  
14,2,8645.687500  
14,2,2679.772727  
14,2,1680.810811  
14,2,2466.513298  
14,2,4621.744444  
14,2,1968.816327  
14,2,2471.798611  
14,2,6924.524664  
14,2,15770.341463  
14,2,3726.382212  
14,2,10825.843137  
14,2,2108.935185  
14,2,2068.773256  
14,2,2954.834239  
14,2,8081.875000  
14,2,1684.459239  
14,2,12361.881944  
14,2,3485.745455  
14,2,2904.875000  
14,2,2350.191327  
14,2,3526.050000  
14,2,6367.047500  
14,2,3553.013514  
14,2,1665.834302  
14,2,1579.731771  
14,2,2311.539062  
14,2,3511.773026  
14,2,6022.677632  
14,2,3731.303125  
14,2,6949.990000  
14,2,1802.486111  
14,2,2264.033784  
14,2,2041.526316  
14,2,3955.164634  
14,2,2534.989362  
14,2,2441.882353  
14,2,3122.905405  
14,2,1907.377841  
14,2,11645.615909  
14,2,3010.767442  
14,2,4136.250000

14,2,2202.024390  
14,2,2680.016447  
14,2,11777.825000  
14,2,2696.095109  
14,2,2475.990385  
14,2,2165.946429  
14,2,6925.599490  
14,2,2088.421875  
14,2,3616.787234  
14,2,3699.827703  
14,2,4502.545732  
14,2,2874.593750  
14,2,5264.645349  
14,2,2056.948864  
14,2,4118.945652  
14,2,2602.703947  
14,2,3439.698718  
14,2,2323.015625  
14,2,1890.774390  
14,2,2644.962500  
14,2,2663.238095  
14,2,3179.274038  
14,2,1720.993902  
14,2,9172.490909  
14,2,3011.259146  
14,2,5087.946429  
14,2,5690.405660  
14,2,2681.540984  
14,2,4677.903846  
14,2,3997.638298  
14,2,2911.030556  
14,2,1519.809211  
14,2,1661.369565  
14,2,2536.692308  
14,2,5510.059375  
14,2,1733.345982  
14,2,4472.522059  
14,2,5156.637195  
14,2,3302.454545  
14,2,1591.828947  
14,2,1560.156977  
14,2,3019.918367  
14,2,5852.743056  
14,2,6284.830357  
14,2,11106.244898  
14,2,11602.292683  
14,2,5100.261364  
14,2,4640.342857  
14,2,2784.277778  
14,2,22045.595588  
14,2,5016.947368  
14,2,2523.039634  
14,2,4400.875000  
14,2,1551.372222  
14,2,3543.182692  
14,2,2442.019231  
14,2,2099.182292  
14,2,2682.333333  
14,2,1865.159091  
14,2,1815.289474  
14,2,1570.937500  
14,2,4599.912500  
14,2,2016.689904  
14,2,3387.958333  
14,2,2549.224359  
14,2,1731.425676

14,2,1996.260000  
14,2,3789.557692  
14,2,1533.994186  
14,2,2334.063953  
14,2,2457.254545  
14,2,6278.596939  
14,2,10799.909091  
14,2,1663.837500  
14,2,6597.981707  
14,2,22708.243421  
14,2,3228.269231  
14,2,7254.426829  
14,2,4818.171053  
14,2,45599.848684  
14,2,3404.233333  
14,2,1594.420000  
14,2,2417.130102  
14,2,1613.275641  
14,2,3917.263780  
14,2,1877.037736  
14,2,2356.039474  
14,2,1967.759146  
14,2,4144.688679  
14,2,7053.102564  
14,2,8953.141667  
14,2,15510.155844  
14,2,4912.072674  
14,2,3605.833333  
14,2,1968.396739  
14,2,2338.727500  
14,2,2412.710526  
14,2,4088.397959  
14,2,2515.377841  
14,2,3075.928571  
14,2,6554.750000  
14,2,2676.523810  
14,2,4427.042614  
14,2,4244.735795  
14,2,2507.529412  
14,2,2523.554054  
14,2,6685.400000  
14,2,8305.438725  
14,2,11031.375000  
14,2,4126.844828  
14,2,2577.221591  
14,2,1626.685484  
14,2,6862.520833  
14,2,4540.680233  
14,2,5427.854651  
14,2,1821.061224  
14,2,3245.273810  
14,2,10467.965426  
14,2,2163.628378  
14,2,3025.125000  
14,2,2022.729730  
14,2,10909.539877  
14,2,7301.750000  
14,2,1606.788043  
14,2,9327.117647  
14,2,1556.053030  
14,2,3810.276042  
14,2,1818.193750  
14,2,3675.000000  
14,2,5112.494792  
14,2,100295.550000  
14,2,1637.163265

14,2,1905.000000  
14,2,1752.338068  
14,2,2428.583333  
14,2,1686.142857  
14,2,1664.222973  
14,2,3569.281250  
14,2,1913.263587  
14,2,2896.189024  
14,2,1587.285714  
14,2,4001.367500  
14,2,6949.013158  
14,2,4036.168478  
14,2,2517.537879  
14,2,4724.948980  
14,2,2689.700000  
14,2,1825.692857  
14,2,8025.039062  
14,2,6133.819767  
14,2,4814.307692  
14,2,1797.522727  
14,2,1543.714660  
14,2,1666.394022  
14,2,6065.602941  
14,2,2820.201087  
14,2,3810.250000  
14,2,1869.036458  
14,2,7562.765909  
14,2,2863.118421  
14,2,2434.250000  
14,2,2034.571429  
14,2,3619.212766  
14,2,4674.601190  
14,2,1536.086538  
14,2,1766.787791  
14,2,10809.894737  
14,2,2507.333333  
14,2,4700.560976  
14,2,1891.864865  
14,2,5792.605114  
14,2,1771.500000  
14,2,2687.643617  
14,2,4869.965517  
14,2,4298.773936  
14,2,3015.040816  
14,2,9567.642500  
14,2,3037.800000  
14,2,1836.085000  
14,2,1524.289634  
14,2,4556.375000  
14,2,9336.176471  
14,2,3207.717105  
14,2,3263.000000  
14,2,1815.916667  
14,2,8929.041667  
14,2,3039.145078  
14,2,1749.375000  
14,2,18696.121951  
14,2,1902.922619  
14,2,4900.545455  
14,2,1916.000000  
14,2,1865.339286  
14,2,1567.375000  
14,2,1600.654762  
14,2,5377.791667  
14,2,1666.475000  
14,2,11320.575000

14,2,2308.630208  
14,2,2516.900000  
14,2,2575.844444  
14,2,3403.737500  
14,2,5325.273438  
14,2,29808.950000  
14,2,1747.546875  
14,2,2324.666667  
14,2,3948.937500  
14,2,2260.086957  
14,2,1777.276163  
14,2,2066.854167  
14,2,3317.057692  
14,2,1653.617647  
14,2,7933.758333  
14,2,3089.972826  
14,2,3707.270270  
14,2,1944.675676  
14,2,2850.673913  
14,2,1790.902500  
14,2,2154.356383  
14,2,1955.365625  
14,2,3071.461538  
14,2,1604.521875  
14,2,7124.235119  
14,2,2238.551136  
14,2,9342.727273  
14,2,30584.685714  
14,2,2087.089744  
14,2,9076.153409  
14,2,3730.346939  
14,2,2787.712766  
14,2,2168.625000  
14,2,2900.666667  
14,2,4082.687500  
14,2,3262.058824  
14,2,3230.622449  
14,2,2638.294444  
14,2,3617.175000  
14,2,6047.707447  
14,2,17022.730769  
14,2,3696.000000  
14,2,1876.577778  
14,2,2104.000000  
14,2,3228.340782  
14,2,2370.401163  
14,2,5364.520349  
14,2,3203.225000  
14,2,1736.204082  
14,2,2585.563776  
14,2,1650.000000  
14,2,1572.375000  
14,2,1851.647059  
14,2,4414.895349  
14,2,4483.947500  
14,2,1709.844595  
14,2,7219.138889  
14,2,1856.872093  
14,2,1677.750000  
14,2,5431.638498  
14,2,9989.127389  
14,2,3094.900000  
14,2,6107.214286  
14,2,2740.625000  
14,2,3844.785000  
14,2,2617.724490

14,2,2082.489362  
14,2,2176.659884  
14,2,3088.527174  
14,2,4740.905405  
14,2,1507.307692  
14,2,3729.430000  
14,2,2767.750000  
14,2,3819.937500  
14,2,2049.742021  
14,2,2486.818182  
14,2,3674.625000  
14,2,2449.882353  
14,2,2444.909091  
14,2,10143.017045  
14,2,1901.554839  
14,2,2019.065476  
14,2,2181.750000  
14,2,1872.560000  
14,2,8171.291045  
14,2,4371.710843  
14,2,2104.651832  
14,2,2963.500000  
14,2,4614.995098  
14,2,1762.764535  
14,2,3818.515625  
14,2,3506.091463  
14,2,1731.674107  
14,2,3798.356771  
14,2,2511.000000  
14,2,1715.107143  
14,2,3405.130319  
14,2,2523.134804  
14,2,2541.324324  
14,2,1925.413043  
14,2,4418.409884  
14,2,1997.526316  
14,2,1811.513158  
14,2,11068.366477  
14,2,2336.938953  
14,2,2734.318182  
14,2,3232.962121  
14,2,3744.750000  
14,2,4734.914352  
14,2,1688.264423  
14,2,10443.311321  
14,2,1769.183140  
14,2,12412.919643  
14,2,6275.926471  
14,2,2872.296875  
14,2,1871.238095  
14,2,3032.625000  
14,2,6548.388298  
14,2,2439.544118  
14,2,2595.949324  
14,2,1893.052632  
14,2,1544.195652  
14,2,7379.463235  
14,2,3907.166667  
14,2,3456.386574  
14,2,37281.287162  
14,2,1642.335000  
14,2,4132.744444  
14,2,7284.352941  
14,2,4914.718750  
14,2,4135.000000  
14,2,3548.773585

14,2,1629.775000  
14,2,3361.250000  
14,2,3298.929348  
14,2,1750.937500  
14,2,2406.106250  
14,2,5726.836735  
14,2,2417.515625  
14,2,2565.809659  
14,2,3920.037383  
14,2,3680.658537  
14,2,2026.097561  
14,2,2016.908537  
14,2,5711.160714  
14,2,2758.847826  
14,2,4764.000000  
14,2,3149.116279  
14,2,2134.968750  
14,2,1774.230769  
14,2,2244.366279  
14,2,2910.774390  
14,2,6675.921875  
14,2,2266.292683  
14,2,2726.904070  
14,2,35490.979167  
14,2,1996.673295  
14,2,1771.514706  
14,2,5187.829787  
14,2,3113.522059  
14,2,3231.136628  
14,2,2285.558824  
14,2,1878.917453  
14,2,7282.530612  
14,2,13392.797500  
14,2,14581.945813  
14,2,2176.002976  
14,2,2500.699519  
14,2,4147.405660  
14,2,12221.102273  
14,2,8693.107143  
14,2,2449.914634  
14,2,2284.283784  
14,2,1735.533333  
14,2,1741.246795  
14,2,4785.926020  
14,2,2652.854167  
14,2,10251.434426  
14,2,5093.340625  
14,2,2826.024390  
14,2,3118.455357  
14,2,3680.087766  
14,2,4119.639205  
14,2,2464.361702  
14,2,5569.714286  
14,2,2846.614130  
14,2,2615.847826  
14,2,1550.554878  
14,2,4830.632979  
14,2,9057.750000  
14,2,7797.154070  
14,2,3724.216667  
14,2,1564.278646  
14,2,1527.913265  
14,2,8642.886792  
14,2,1803.888889  
14,2,2763.128205  
14,2,3085.375000

14,2,5876.303571  
14,2,1563.415761  
14,2,3067.380435  
14,2,2098.797872  
14,2,1715.634146  
14,2,9720.220395  
14,2,4571.370968  
14,2,2487.086957  
14,2,4177.588542  
14,2,2719.359375  
14,2,2175.569079  
14,2,2527.435714  
14,2,2105.058824  
14,2,2704.636029  
14,2,5427.400943  
14,2,2641.125000  
14,2,2024.245283  
14,2,1902.679245  
14,2,4871.802632  
14,2,3074.358333  
14,2,1523.485294  
14,2,1751.041667  
14,2,1696.437500  
14,2,1723.095745  
14,2,3812.054054  
14,2,2501.296053  
14,2,5528.841981  
14,2,2457.348214  
14,2,2317.600000  
14,2,5648.962054  
14,2,3120.965517  
14,2,3016.393617  
14,2,6335.927326  
14,2,3483.725000  
14,2,5254.983491  
14,2,4863.115183  
14,2,2931.777778  
14,2,3535.646277  
14,2,23051.867347  
14,2,8240.944444  
14,2,13211.581395  
14,2,2186.378472  
14,2,2340.775000  
14,2,2218.322115  
14,2,1549.130952  
14,2,1652.771341  
14,2,2150.769231  
14,2,2094.861111  
14,2,1779.772959  
14,2,3827.631250  
14,2,2871.600000  
14,2,1499.891892  
14,2,3706.518072  
14,2,2047.275510  
14,2,8030.902913  
14,2,2224.384375  
14,2,7826.764535  
14,2,3180.610465  
14,2,4111.656250  
14,2,12628.866667  
14,2,2098.133621  
14,2,5156.351562  
14,2,5045.734043  
14,2,2191.449468  
14,2,2119.283784  
14,2,12725.302419

14,2,2187.375000  
14,2,28334.542614  
14,2,6833.000000  
14,2,11037.276596  
14,2,3793.102679  
14,2,2363.952778  
14,2,7152.578125  
14,2,13395.677273  
14,2,2187.787500  
14,2,1960.250000  
14,2,1629.581699  
14,2,2743.656250  
14,2,4036.232955  
14,2,4695.912500  
14,2,1681.576531  
14,2,3003.432927  
14,2,4463.363426  
14,2,5364.826087  
14,2,2140.725000  
14,2,2480.815972  
14,2,4204.508523  
14,2,3232.295918  
14,2,1997.587209  
14,2,4466.459459  
14,2,1628.746622  
14,2,1543.215116  
14,2,2662.685976  
14,2,5490.144366  
14,2,6354.288462  
14,2,2065.625000  
14,2,2812.236842  
14,2,2046.607143  
14,2,2255.349490  
14,2,4073.578571  
14,2,1542.372449  
14,2,2504.073529  
14,2,6664.074074  
14,2,2358.100000  
14,2,1620.671429  
14,2,6182.541667  
14,2,2137.576220  
14,2,1880.495000  
14,2,4187.550000  
14,2,2554.944767  
14,2,11489.847458  
14,2,1579.818182  
14,2,1929.340000  
14,2,2134.546875  
14,2,3262.500000  
14,2,1631.641026  
14,2,2137.512195  
14,2,8309.174419  
14,2,1960.666667  
14,2,2182.125000  
14,2,3882.333333  
14,2,2906.470588  
14,2,3665.884615  
14,2,12471.467105  
14,2,10375.774457  
14,2,1939.078125  
14,2,6227.818627  
14,2,2174.315789  
14,2,12314.798828  
14,2,5650.259259  
14,2,4987.375000  
14,2,4356.025641

14,2,1907.687500  
14,2,2064.651786  
14,2,2735.225000  
14,2,3790.032051  
14,2,1524.250000  
14,2,1613.168478  
14,2,1991.309524  
14,2,2436.315217  
14,2,3312.591837  
14,2,1594.354167  
14,2,1790.390244  
14,2,1640.701389  
14,2,5466.627273  
14,2,2047.750000  
14,2,4698.181122  
14,2,3456.155242  
14,2,2058.250000  
14,2,2473.537791  
14,2,8117.875000  
14,2,15664.971311  
14,2,4129.000000  
14,2,3700.734043  
14,2,9752.946078  
14,2,3707.952830  
14,2,3392.709677  
14,2,2063.152500  
14,2,29694.715686  
14,2,1904.792857  
14,2,3615.115909  
14,2,3572.929348  
14,2,3524.274457  
14,2,3007.045455  
14,2,3788.138158  
14,2,20128.410714  
14,2,1779.750000  
14,2,2847.555556  
14,2,1536.040625  
14,2,2599.700000  
14,2,1642.742347  
14,2,3339.520833  
14,2,2052.163690  
14,2,2046.236842  
14,2,7044.311224  
14,2,4141.062500  
14,2,1640.789062  
14,2,18264.837264  
14,2,6075.139706  
14,2,1957.976744  
14,2,3799.833333  
14,2,4019.121622  
14,2,2845.702128  
14,2,2108.964744  
14,2,9244.875000  
14,2,1600.080645  
14,2,1506.051136  
14,2,2724.517442  
14,2,1827.796512  
14,2,6007.416667  
14,2,3575.295775  
14,2,4511.369792  
14,2,3475.071429  
14,2,1851.968750  
14,2,1579.534375  
14,2,1575.087209  
14,2,1777.536585  
14,2,2241.853261

14,2,3036.455729  
14,2,7359.921053  
14,2,1540.408537  
14,2,1514.195946  
14,2,3779.400641  
14,2,2052.959559  
14,2,11553.155556  
14,2,2937.000000  
14,2,2770.131250  
14,2,2664.875000  
14,2,3830.780488  
14,2,1901.791667  
14,2,3047.206522  
14,2,6035.430288  
14,2,1840.250000  
14,2,2184.963068  
14,2,2925.119048  
14,2,4618.204082  
14,2,1724.986111  
14,2,1637.025641  
14,2,16313.715909  
14,2,2170.600000  
14,2,5790.461538  
14,2,3206.372093  
14,2,1902.661932  
14,2,7890.738095  
14,2,1890.506098  
14,2,8466.234043  
14,2,2514.134146  
14,2,10822.621951  
14,2,3369.781553  
14,2,1856.271845  
14,2,1786.225694  
14,2,9411.841463  
14,2,9984.674569  
14,2,10336.214015  
14,2,5860.777778  
14,2,3293.772727  
14,2,3452.614286  
14,2,10338.526316  
14,2,1929.917553  
14,2,1666.517500  
14,2,2677.972973  
14,2,5220.067073  
14,2,28943.150568  
14,2,2044.744444  
14,2,2907.184524  
14,2,2091.154412  
14,2,10836.380000  
14,2,5848.571429  
14,2,3586.000000  
14,2,6872.377358  
14,2,29221.480392  
14,2,2358.000000  
14,2,3688.753769  
14,2,8413.038462  
14,2,11251.828488  
14,2,2127.666667  
14,2,8884.494898  
14,2,2811.994681  
14,2,4254.308511  
14,2,1916.500000  
14,2,4070.677778  
14,2,2157.987500  
14,2,3694.869565  
14,2,1950.208333

14,2,35022.062500  
14,2,2704.607143  
14,2,3210.186047  
14,2,1865.131250  
14,2,4034.095455  
14,2,2492.374332  
14,2,3100.384615  
14,2,4515.153846  
14,2,8567.136905  
14,2,3136.000000  
14,2,2732.354545  
14,2,3125.880000  
14,2,2134.836538  
14,2,2084.442308  
14,2,5436.509615  
14,2,11612.505952  
14,2,9873.111111  
14,2,12022.459135  
14,2,1895.161111  
14,2,4910.979592  
14,2,1901.074468  
14,2,7008.387755  
14,2,4038.111111  
14,2,2807.477273  
14,2,1546.646739  
14,2,2306.427083  
14,2,2300.072674  
14,2,10810.442308  
14,2,1893.231707  
14,2,2482.800926  
14,2,2574.427083  
14,2,2714.930851  
14,2,12143.942308  
14,2,4098.366972  
14,2,7396.814516  
14,2,4841.909639  
14,2,1855.800000  
14,2,2950.428571  
14,2,2045.767442  
14,2,3103.108491  
14,2,3514.152174  
14,2,6222.363372  
14,2,1499.551630  
14,2,1907.948529  
14,2,2203.284574  
14,2,5687.555556  
14,2,1814.055000  
14,2,7781.994565  
14,2,4534.564394  
14,2,3310.384868  
14,2,5790.460938  
14,2,5066.625000  
14,2,3388.156250  
14,2,2501.156250  
14,2,2508.755102  
14,2,6369.044393  
14,2,8419.177083  
14,2,3692.812500  
14,2,4917.740385  
14,2,10880.645833  
14,2,3067.282609  
14,2,6646.819079  
14,2,2358.682692  
14,2,2486.342262  
14,2,2807.468750  
14,2,1607.313953

14,2,3875.320000  
14,2,2346.008721  
14,2,4622.258929  
14,2,5775.015306  
14,2,1837.486842  
14,2,1628.246711  
14,2,1621.614130  
14,2,2986.002193  
14,2,1747.635638  
14,2,3691.487179  
14,2,7487.209239  
14,2,2124.763158  
14,2,5285.232143  
14,2,2768.592391  
14,2,3538.500000  
14,2,1686.756098  
14,2,1727.096154  
14,2,1786.663043  
14,2,1939.815789  
14,2,2078.185000  
14,2,1981.250000  
14,2,1501.920732  
14,2,1743.921875  
14,2,2446.902778  
14,2,1909.443182  
14,2,2897.420455  
14,2,7316.238971  
14,2,3360.977778  
14,2,37635.174603  
14,2,1726.432065  
14,2,10802.650000  
14,2,22481.409091  
14,2,1660.270349  
14,2,4197.354167  
14,2,2034.164062  
14,2,4535.750000  
14,2,2395.875000  
14,2,3486.018817  
14,2,2311.318182  
14,2,3163.137195  
14,2,1946.064189  
14,2,4247.071429  
14,2,5790.146341  
14,2,3323.239035  
14,2,1676.963415  
14,2,2891.762195  
14,2,2633.011905  
14,2,2532.510204  
14,2,2526.756098  
14,2,3266.691176  
14,2,1562.780405  
14,2,1819.377500  
14,2,8685.609272  
14,2,2270.015625  
14,2,1814.964674  
14,2,4571.393293  
14,2,3907.784314  
14,2,2469.743421  
14,2,1817.600000  
14,2,2591.437500  
14,2,23071.798077  
14,2,1539.589286  
14,2,6644.947917  
14,2,2245.656250  
14,2,5511.806122  
14,2,2836.078125

14,2,1666.250000  
14,2,9571.593750  
14,2,2328.709375  
14,2,2100.993243  
14,2,1800.375000  
14,2,3749.517442  
14,2,2694.346154  
14,2,2997.165000  
14,2,3875.240854  
14,2,3141.000000  
14,2,2644.338542  
14,2,1726.841667  
14,2,2665.619681  
14,2,3051.000000  
14,2,1774.414894  
14,2,1579.388889  
14,2,3650.292683  
14,2,2251.371324  
14,2,2174.938776  
14,2,2651.075000  
14,2,3375.205128  
14,2,16493.796610  
14,2,1822.737500  
14,2,2498.872340  
14,2,2434.762500  
14,2,5238.816327  
14,2,1754.500000  
14,2,3844.872340  
14,2,3179.000000  
14,2,5141.479730  
14,2,3503.639535  
14,2,4754.075658  
14,2,6607.883333  
14,2,4896.989362  
14,2,1853.239130  
14,2,2203.642857  
14,2,1516.799419  
14,2,1664.298077  
14,2,6570.958333  
14,2,8306.291667  
14,2,2233.441489  
14,2,3109.250000  
14,2,1818.597222  
14,2,1972.974138  
14,2,4419.214286  
14,2,5174.087766  
14,2,1508.116379  
14,2,1602.930556  
14,2,3760.792857  
14,2,2856.757485  
14,2,2220.472362  
14,2,3293.413242  
14,2,1829.258621  
14,2,2762.750000  
14,2,2975.500000  
14,2,3092.390244  
14,2,1630.026316  
14,2,2772.365854  
14,2,1522.333333  
14,2,3218.522727  
14,2,2920.000000  
14,2,2299.250000  
14,2,1713.477273  
14,2,2843.171123  
14,2,1976.200000  
14,2,6094.508982

14,2,2619.506579  
14,2,3999.750000  
14,2,5593.560976  
14,2,23356.704545  
14,2,4262.189024  
14,2,3131.758333  
14,2,5503.491935  
14,2,2887.961111  
14,2,1903.137255  
14,2,2052.729592  
14,2,7162.362500  
14,2,3997.857143  
14,2,4951.250000  
14,2,9358.634615  
14,2,3017.881098  
14,2,10311.280702  
14,2,5670.645833  
14,2,3073.095109  
14,2,4733.100000  
14,2,2513.571023  
14,2,3762.539286  
14,2,1566.750000  
14,2,5826.809896  
14,2,9961.814516  
14,2,1775.966346  
14,2,4306.532500  
14,2,1511.857143  
14,2,5314.068862  
14,2,4978.492188  
14,2,10056.666667  
14,2,3183.183333  
14,2,2486.635870  
14,2,5288.727273  
14,2,8238.068966  
14,2,3294.567935  
14,2,3322.082524  
14,2,2189.775000  
14,2,5050.454545  
14,2,7478.194444  
14,2,3071.298913  
14,2,3537.337500  
14,2,6189.076923  
14,2,2539.177778  
14,2,2802.736842  
14,2,3958.820652  
14,2,35674.711538  
14,2,2270.833333  
14,2,2618.375000  
14,2,3056.549479  
14,2,1780.750000  
14,2,3197.688776  
14,2,13946.305556  
14,2,9353.258929  
14,2,3454.148936  
14,2,3919.224490  
14,2,2607.070755  
14,2,2058.164634  
14,2,1916.312500  
14,2,1813.648256  
14,2,4813.945122  
14,2,2550.474093  
14,2,19167.000000  
14,2,7807.362245  
14,2,2200.608696  
14,2,2179.483516  
14,2,3304.069712

14,2,1900.593023  
14,2,1970.527027  
14,2,3209.015244  
14,2,6791.355556  
14,2,2202.804878  
14,2,6713.777174  
14,2,18946.584302  
14,2,2288.527027  
14,2,1593.294737  
14,2,1750.387097  
14,2,1542.138393  
14,2,5694.780000  
14,2,2913.782609  
14,2,4388.500000  
14,2,1590.581081  
14,2,5331.333333  
14,2,6980.359375  
14,2,3212.063725  
14,2,2079.552885  
14,2,1539.277778  
14,2,7922.403846  
14,2,2609.307692  
14,2,1661.090625  
14,2,7338.244681  
14,2,3552.243902  
14,2,8396.450000  
14,2,4571.319149  
14,2,4370.735849  
14,2,4107.148241  
14,2,1643.564103  
14,2,1608.281915  
14,2,7996.405172  
14,2,1710.234043  
14,2,4620.522167  
14,2,6623.823171  
14,2,8157.654412  
14,2,5224.379310  
14,2,1949.645161  
14,2,1855.598837  
14,2,2019.572115  
14,2,4224.187500  
14,2,1626.970745  
14,2,2313.370000  
14,2,1782.570513  
14,2,4878.721591  
14,2,2566.483333  
14,2,2015.610294  
14,2,2682.291667  
14,2,5611.560000  
14,2,1552.538462  
14,2,2568.135417  
14,2,1614.405000  
14,2,1655.840686  
14,2,5528.553191  
14,2,1750.282143  
14,2,2008.618421  
14,2,6815.833333  
14,2,2043.062500  
14,2,1913.757979  
14,2,6433.339286  
14,2,1932.479167  
14,2,1542.000000  
14,2,2606.988636  
14,2,19601.319149  
14,2,7073.745763  
14,2,3673.742857

14,2,3193.779070  
14,2,2019.669355  
14,2,4206.201923  
14,2,3144.829268  
14,2,3502.433333  
14,2,3620.617021  
14,2,5690.522222  
14,2,6506.257653  
14,2,1966.625000  
14,2,2518.473404  
14,2,3874.307292  
14,2,8945.292763  
14,2,7431.960366  
14,2,2121.965909  
14,2,1644.958333  
14,2,2729.846939  
14,2,2030.750000  
14,2,4771.978571  
14,2,1559.057927  
14,2,1805.562500  
14,2,2139.413462  
14,2,4934.936170  
14,2,8388.820000  
14,2,4764.250000  
14,2,5654.900000  
14,2,2421.236842  
14,2,2087.125000  
14,2,2880.238095  
14,2,2833.736702  
14,2,1850.000000  
14,2,4113.819444  
14,2,4232.569444  
14,2,18034.555556  
14,2,59892.964286  
14,2,3372.500000  
14,2,7176.375000  
14,2,2332.531250  
14,2,2965.662791  
14,2,1680.289474  
14,2,1534.600000  
14,2,2196.328704  
14,2,16128.024038  
14,2,2288.635870  
14,2,1594.671875  
14,2,1922.609375  
14,2,5804.502404  
14,2,6321.914474  
14,2,1863.637500  
14,2,1747.940625  
14,2,1530.506410  
14,2,6884.528646  
14,2,1520.951220  
14,2,1816.767442  
14,2,2669.298077  
15,1,2394.625000  
15,1,58362.497159  
15,1,6252.520833  
15,1,2090.156250  
15,1,1504.208333  
15,1,1563.726744  
15,1,53367.602273  
15,1,4485.600000  
15,1,1528.459559  
15,1,10774.609756  
15,1,1725.444853  
15,1,25144.739865

15,1,3455.465116  
15,1,4200.394886  
15,1,2575.388889  
15,1,48504.689024  
15,1,1577.252976  
15,1,42950.972973  
15,1,2098.571429  
15,1,2895.563830  
15,1,3498.516667  
15,1,1944.578125  
15,1,1834.744186  
15,1,2668.556250  
15,1,15208.941176  
15,1,2039.211310  
15,1,1673.455882  
15,1,51098.059211  
15,1,7798.192308  
15,1,90229.578125  
15,1,2447.603659  
15,1,53058.789474  
15,1,1633.555147  
15,1,13362.713816  
15,1,1744.019444  
15,1,1513.668605  
15,1,4198.367857  
15,1,2385.839286  
15,1,10515.081818  
15,1,4388.750000  
15,1,23024.255435  
15,1,175682.946809  
15,1,13621.855769  
15,1,12084.701087  
15,1,2332.218023  
15,1,4176.487805  
15,1,2751.500000  
15,1,126940.282051  
15,1,15800.640625  
15,1,40261.708333  
15,1,1688.979592  
15,1,92683.680233  
15,1,1617.523026  
15,1,144626.686047  
15,1,47047.484375  
15,1,31311.918605  
15,1,29377.687500  
15,1,2848.067708  
15,1,3475.086957  
15,1,2542.549419  
15,1,3168.701220  
15,1,81067.285714  
15,1,2081.602273  
15,1,4118.000000  
15,1,1811.625000  
15,1,128402.628049  
15,1,79605.476190  
15,1,2462.343750  
15,1,8922.763158  
15,1,1899.050595  
15,1,5837.275000  
15,1,1799.698864  
15,1,2406.372340  
15,1,89376.038690  
15,1,1731.295732  
15,1,50880.692857  
15,1,3905.034722  
15,1,2777.187500

15,1,27376.384615  
15,1,8539.477564  
15,1,89929.682927  
15,1,49148.314024  
15,1,1737.923077  
15,1,1659.278846  
15,1,1602.186047  
15,1,91697.975000  
15,1,2126.584375  
15,1,1531.468750  
15,1,1980.146341  
15,1,1649.321429  
15,1,2313.701087  
15,1,29979.980769  
15,1,38730.321429  
15,1,1830.122222  
15,1,1963.784314  
15,1,11624.371711  
15,1,38989.272727  
15,1,25893.142857  
15,1,3174.086957  
15,1,66093.015152  
15,1,1651.912234  
15,1,1661.010870  
15,1,4981.778409  
15,1,2079.923077  
15,1,107184.837209  
15,1,3092.512500  
15,1,9870.914894  
15,1,1975.136364  
15,1,1769.558824  
15,1,90366.168605  
15,1,2499.637500  
15,1,4016.622449  
15,1,1832.794643  
15,1,36668.132353  
15,1,2277.564024  
15,1,9786.675000  
15,1,1607.475543  
15,1,14486.279762  
15,1,4489.845930  
15,1,1538.524457  
15,1,3311.114130  
15,1,14897.016667  
15,1,81974.125000  
15,1,3025.300000  
15,1,1948.216912  
15,1,1803.600000  
15,1,1999.012195  
15,1,122806.368902  
15,1,61018.105769  
15,1,1999.272727  
15,1,2781.207237  
15,1,2084.805556  
15,1,2023.154070  
15,1,149921.231383  
15,1,4867.750000  
15,1,1733.062500  
15,1,3394.110795  
15,1,105110.851064  
15,1,34095.159091  
15,1,7628.625000  
15,1,1524.570000  
15,1,51550.691176  
15,1,4929.125000  
15,1,2872.435345

15,1,9180.846154  
15,1,2622.500000  
15,1,1813.684211  
15,1,87803.993750  
15,1,3585.441176  
15,1,2232.398438  
15,1,3587.674419  
15,1,25312.459459  
15,1,3874.428571  
15,1,1695.104730  
15,1,13974.636364  
15,1,2924.361111  
15,1,3876.864583  
15,1,3554.513889  
15,1,23990.733333  
15,1,4225.433140  
15,1,4424.731707  
15,1,1908.330882  
15,1,2092.192308  
15,1,7362.568627  
15,1,4413.483974  
15,1,4565.050000  
15,1,3909.567308  
15,1,2081.138298  
15,1,30594.947917  
15,1,1571.437500  
15,1,2069.617647  
15,1,4342.858108  
15,1,1533.136628  
15,1,2078.043919  
15,1,7488.052083  
15,1,92246.167763  
15,1,2101.669118  
15,1,1838.150000  
15,1,1520.519231  
15,1,3561.600000  
15,1,22251.450000  
15,1,43311.421875  
15,1,6092.937500  
15,1,1776.895833  
15,1,9021.476744  
15,1,15928.006410  
15,1,2344.979167  
15,1,63064.904762  
15,1,1672.279412  
15,1,3093.314103  
15,1,6684.713710  
15,1,7988.463415  
15,1,7194.652174  
15,1,11782.387931  
15,1,3058.032258  
15,1,10029.971154  
15,1,110522.400000  
15,1,13453.235795  
15,1,63374.925000  
15,1,1507.010870  
15,1,17455.495000  
15,1,36310.625000  
15,1,4851.812500  
15,1,3702.791667  
15,1,63069.217857  
15,1,135139.684375  
15,1,1779.558140  
15,1,61498.041667  
15,1,1633.143293  
15,1,4146.760638

15,1,3351.671875  
15,1,129390.619318  
15,1,1514.035714  
15,1,2012.921875  
15,1,13164.375000  
15,1,1528.093750  
15,1,1893.511111  
15,1,1606.000000  
15,1,1846.574324  
15,1,3377.108974  
15,1,135594.250000  
15,1,3382.926829  
15,1,3483.890625  
15,1,1666.525000  
15,1,8539.871324  
15,1,194379.175532  
15,1,94682.172794  
15,1,3081.484694  
15,1,7619.801282  
15,1,1705.529412  
15,1,2782.232558  
15,1,2554.375000  
15,1,6623.454545  
15,1,6300.250000  
15,1,49522.917857  
15,1,1829.815909  
15,1,1664.729167  
15,1,72800.456250  
15,1,98453.500000  
15,1,1822.674020  
15,1,1534.853261  
15,1,6196.061224  
15,1,41735.562500  
15,1,3716.843137  
15,1,2610.201613  
15,1,78903.519737  
15,1,103631.093750  
15,1,8383.800000  
15,1,1513.666667  
15,1,1834.408333  
15,1,195827.000000  
15,1,2646.041667  
15,1,15361.500000  
15,1,1855.213068  
15,1,57334.128472  
15,1,2793.818750  
15,1,4510.195513  
15,1,1887.850000  
15,1,7808.900000  
15,1,2546.750000  
15,1,3540.156863  
15,1,1780.944444  
15,1,2674.071875  
15,1,2908.895161  
15,1,5822.589286  
15,1,14071.486111  
15,1,2326.176630  
15,1,92104.118750  
15,1,2100.854651  
15,1,1815.973214  
15,1,2935.793103  
15,1,6874.125000  
15,1,103808.259434  
15,1,8234.244186  
15,1,3275.645833  
15,1,28687.791667

15,1,1654.956395  
15,1,2618.205556  
15,1,21553.535714  
15,1,3691.077128  
15,1,6586.200000  
15,1,49055.843750  
15,1,12962.615385  
15,1,5652.964286  
15,1,2231.382143  
15,1,4480.732558  
15,1,7392.384615  
15,1,6736.785714  
15,1,93173.997093  
15,1,66279.925926  
15,1,19713.125000  
15,1,55685.464286  
15,1,4814.036585  
15,1,69325.222973  
15,1,20912.294643  
15,1,1582.425676  
15,1,81408.682065  
15,1,5068.208333  
15,1,1563.029762  
15,1,2633.642857  
15,1,37818.281250  
15,1,1975.446809  
15,1,66047.847222  
15,1,6311.826087  
15,1,100730.945312  
15,1,18137.197917  
15,1,1541.000000  
15,1,4237.095238  
15,1,98406.479592  
15,1,6486.467105  
15,1,77896.500000  
15,1,2671.369048  
15,1,2638.457317  
15,1,3702.362805  
15,1,1501.798387  
15,1,3535.671196  
15,1,1699.431818  
15,1,3819.521739  
15,1,36668.844828  
15,1,8539.238636  
15,1,185317.050595  
15,1,2249.897436  
15,1,1525.113636  
15,1,51491.651961  
15,1,59227.615385  
15,1,149072.922222  
15,1,5865.421053  
15,1,7450.336735  
15,1,59874.897059  
15,1,3122.008523  
15,1,2908.842105  
15,1,1879.847826  
15,1,1722.045455  
15,1,82626.119186  
15,1,4452.205556  
15,1,43962.302326  
15,1,2647.392857  
15,1,17415.562500  
15,1,38881.958333  
15,1,6973.470588  
15,1,3698.600000  
15,1,2570.461538

15,1,38905.392857  
15,1,4678.875000  
15,1,1580.500000  
15,1,2061.098684  
15,1,10381.389535  
15,1,59071.071429  
15,1,2403.559211  
15,1,3011.313725  
15,1,105494.125000  
15,1,22843.058824  
15,1,109688.072674  
15,1,6264.830357  
15,1,12277.000000  
15,1,25406.312500  
15,1,1658.416667  
15,1,3109.362500  
15,1,43506.860465  
15,1,12082.344828  
15,1,197513.658654  
15,1,2379.083333  
15,1,36041.138158  
15,1,157531.169444  
15,1,1802.000000  
15,1,7421.179487  
15,1,10493.756579  
15,1,1519.313953  
15,1,2103.196970  
15,1,39017.250000  
15,1,4704.708333  
15,1,31821.973485  
15,1,24050.870968  
15,1,4769.031250  
15,1,90545.296875  
15,1,73364.987500  
15,1,1835.375000  
15,1,5415.076923  
15,1,38858.446429  
15,1,3447.250000  
15,1,33551.037162  
15,1,58418.815217  
15,1,2546.418605  
15,1,57577.221154  
15,1,32491.821875  
15,1,1514.395833  
15,1,1737.706250  
15,1,1605.059524  
15,1,23127.494565  
15,1,1628.500000  
15,1,56306.945946  
15,1,4425.771635  
15,1,28959.625000  
15,1,2759.196809  
15,1,2868.863636  
15,1,5876.031250  
15,1,2501.881944  
15,1,2091.288043  
15,1,86271.045455  
15,1,1507.655612  
15,1,43350.342857  
15,1,2639.285714  
15,1,48262.113636  
15,1,1710.138889  
15,1,2952.823171  
15,1,6505.704545  
15,1,2249.951220  
15,1,1600.927083

15,1,3495.969388  
15,1,1646.461310  
15,1,3338.130435  
15,1,6966.500000  
15,1,2772.408482  
15,1,2122.657738  
15,1,1921.160714  
15,1,1755.503788  
15,1,3002.324324  
15,1,11416.690476  
15,1,3175.954545  
15,1,1997.000000  
15,1,1531.415816  
15,1,1811.513514  
15,1,20959.415625  
15,1,2489.076705  
15,1,1772.659091  
15,1,9813.323718  
15,1,1539.729167  
15,1,187070.910326  
15,1,1817.046512  
15,1,105060.519231  
15,1,103085.428571  
15,1,1898.911765  
15,1,1640.013889  
15,1,1900.334559  
15,1,8309.414634  
15,1,151357.209302  
15,1,3508.452703  
15,1,3363.649194  
15,1,8112.517857  
15,1,3826.006579  
15,1,1510.921875  
15,1,2430.695652  
15,1,58853.875000  
15,1,2311.687500  
15,1,2747.727273  
15,1,16810.818548  
15,1,11353.357143  
15,1,2167.954082  
15,1,3386.687500  
15,1,1526.141667  
15,1,11104.459559  
15,1,4712.500000  
15,1,2631.477941  
15,1,58853.664773  
15,1,34635.898438  
15,1,3860.718750  
15,1,1559.608696  
15,1,2935.339674  
15,1,15903.375000  
15,1,51364.006250  
15,1,40860.400000  
15,1,1606.275000  
15,1,18572.932927  
15,1,3070.782895  
15,1,38871.512097  
15,1,97611.000000  
15,1,27267.441176  
15,1,5916.656250  
15,1,3280.809524  
15,1,30149.791667  
15,1,4792.057927  
15,1,9061.621875  
15,1,124738.367347  
15,1,2335.413043

15,1,2039.450000  
15,1,2668.730114  
15,1,2753.511628  
15,1,2080.860294  
15,1,9016.763158  
15,1,21945.546875  
15,1,1582.277778  
15,1,28382.179688  
15,1,1946.153846  
15,1,190880.039634  
15,1,2857.989796  
15,1,1558.386364  
15,1,44824.382576  
15,1,79633.036585  
15,1,2119.468085  
15,1,2972.378049  
15,1,1962.800000  
15,1,6906.823529  
15,1,1736.579545  
15,1,2629.025000  
15,1,140428.015625  
15,1,19369.929487  
15,1,13503.392500  
15,1,8902.686170  
15,1,24490.585938  
15,1,1861.243243  
15,1,2918.869565  
15,1,7998.225446  
15,1,1604.265957  
15,1,28739.000000  
15,1,6376.142045  
15,1,29323.523026  
15,1,2124.401786  
15,1,31297.121622  
15,1,160875.883721  
15,1,9853.579861  
15,1,96806.479167  
15,1,1814.863636  
15,1,6574.894737  
15,1,9464.611111  
15,1,4361.125000  
15,1,1649.218750  
15,1,4789.336735  
15,1,2029.604167  
15,1,2468.955556  
15,1,199144.261364  
15,1,1908.476064  
15,1,10477.952703  
15,1,76305.319853  
15,1,1509.261905  
15,1,12538.976190  
15,1,9764.100000  
15,1,2824.701705  
15,1,6436.475000  
15,1,192719.977273  
15,1,1954.844444  
15,1,3003.461957  
15,1,2909.026596  
15,1,1578.964286  
15,1,1963.724432  
15,1,34985.398026  
15,1,23304.255814  
15,1,1649.934783  
15,1,8540.558824  
15,1,4843.500000  
15,1,1513.364130

15,1,59464.621212  
15,1,2444.320122  
15,1,7200.773810  
15,1,116983.038462  
15,1,4779.698370  
15,1,193286.107558  
15,1,38723.887195  
15,1,3072.219512  
15,1,34628.712121  
15,1,1668.157895  
15,1,5921.826087  
15,1,14266.968750  
15,1,55448.385135  
15,1,75575.053571  
15,1,17079.750000  
15,1,2334.019444  
15,1,2398.133929  
15,1,1931.341463  
15,1,33339.025641  
15,1,2335.494318  
15,1,1650.348214  
15,1,2023.718750  
15,1,81724.625000  
15,1,28837.660714  
15,1,42080.166667  
15,1,57654.475000  
15,1,1684.062500  
15,1,1958.918919  
15,1,2085.418269  
15,1,23747.250000  
15,1,2142.000000  
15,1,4173.644022  
15,1,9202.600610  
15,1,25155.448276  
15,1,82015.045918  
15,1,2453.053191  
15,1,20575.237500  
15,1,40654.121212  
15,1,4991.284722  
15,1,3339.043750  
15,1,1800.200000  
15,1,3593.458333  
15,1,1631.101190  
15,1,56427.308824  
15,1,1765.523810  
15,1,3298.838068  
15,1,42162.119444  
15,1,19440.196970  
15,1,20782.756250  
15,1,3041.933673  
15,1,1921.881944  
15,1,80752.757353  
15,1,1775.548077  
15,1,65302.290761  
15,1,13170.906250  
15,1,3117.645000  
15,1,4475.106383  
15,1,2248.085106  
15,1,1609.762195  
15,1,43124.815789  
15,1,3291.971154  
15,1,2098.583333  
15,1,3669.517045  
15,1,1589.037234  
15,1,1638.333333  
15,1,11066.608871

15,1,26730.972656  
15,1,113659.562500  
15,1,3267.965909  
15,1,1665.744444  
15,1,2332.725490  
15,1,1621.843023  
15,1,3395.906250  
15,1,2572.888889  
15,1,7402.406977  
15,1,27378.647436  
15,1,1700.375000  
15,1,32109.108108  
15,1,52443.656250  
15,1,2039.446023  
15,1,41982.796512  
15,1,80825.113636  
15,1,9105.875000  
15,1,1617.267857  
15,1,4907.303571  
15,1,1527.244318  
15,1,120845.801282  
15,1,4342.729730  
15,1,5494.928571  
15,1,1744.762195  
15,1,20814.011628  
15,1,60331.048780  
15,1,7356.589744  
15,1,2281.940000  
15,1,1520.220109  
15,1,2182.154762  
15,1,11662.630682  
15,1,3365.057432  
15,1,1543.850000  
15,1,3858.622340  
15,1,3617.663889  
15,1,187778.375000  
15,1,14004.683140  
15,1,46702.069079  
15,1,2489.789773  
15,1,99838.391304  
15,1,29497.583333  
15,1,2384.117647  
15,1,3414.062500  
15,1,83941.461538  
15,1,5113.833333  
15,1,3179.700980  
15,1,12734.863095  
15,1,34542.043478  
15,1,1561.750000  
15,1,87032.223684  
15,1,1536.958333  
15,1,198922.578947  
15,1,1802.898438  
15,1,78411.000000  
15,1,64205.114286  
15,1,2100.058594  
15,1,2462.433962  
15,1,1504.804878  
15,1,1540.024457  
15,1,152581.451613  
15,1,1861.058140  
15,1,16606.771739  
15,1,65876.312500  
15,1,2054.821023  
15,1,3118.881250  
15,1,82368.838816

15,1,2304.100000  
15,1,129350.826087  
15,1,64307.930556  
15,1,5253.988095  
15,1,12467.243421  
15,1,1513.074219  
15,1,58406.500000  
15,1,4562.496933  
15,1,30773.750000  
15,1,13775.458333  
15,1,2048.753472  
15,1,2428.881250  
15,1,49437.378571  
15,1,1856.231383  
15,1,3175.806452  
15,1,42885.190972  
15,1,1533.695652  
15,1,10446.987500  
15,1,133704.703125  
15,1,1773.943182  
15,1,3881.062500  
15,1,1603.625000  
15,1,1927.955357  
15,1,5134.854651  
15,1,2962.735465  
15,1,72363.857143  
15,1,3604.769231  
15,1,2039.338235  
15,1,94467.632653  
15,1,45888.802083  
15,1,48951.250000  
15,1,22335.043605  
15,1,3243.578947  
15,1,13820.701087  
15,1,1821.432927  
15,1,2120.000000  
15,1,2134.645161  
15,1,69230.639535  
15,1,2592.491279  
15,1,53230.990741  
15,1,3043.500000  
15,1,3213.000000  
15,1,4981.882353  
15,1,1598.166667  
15,1,1647.904762  
15,1,179413.466463  
15,1,2508.410714  
15,1,1711.460938  
15,1,2059.808511  
15,1,54757.787879  
15,1,59154.695652  
15,1,3339.687500  
15,1,100329.018382  
15,1,2926.410256  
15,1,30983.993421  
15,1,8091.755814  
15,1,61643.007653  
15,1,1537.055556  
15,1,1500.465116  
15,1,2440.562500  
15,1,2360.940217  
15,1,30887.700000  
15,1,80816.913462  
15,1,88115.546053  
15,1,13036.009259  
15,1,1512.950000

15,1,92838.581081  
15,1,6232.585938  
15,1,15055.625000  
15,1,37355.738281  
15,1,2485.991667  
15,1,19289.006944  
15,1,58085.763158  
15,1,37163.281250  
15,1,2825.250000  
15,1,8127.314189  
15,1,4861.017964  
15,1,33176.931818  
15,1,2804.213415  
15,1,12802.475000  
15,1,3404.505814  
15,1,2041.910714  
15,1,46107.200000  
15,1,43422.507812  
15,1,5442.641026  
15,1,2398.784375  
15,1,5821.738372  
15,1,1817.120000  
15,1,24516.141892  
15,1,2986.326531  
15,1,5752.614130  
15,1,1620.271739  
15,1,9075.934783  
15,1,1903.880435  
15,1,1789.670732  
15,1,1734.594512  
15,1,2205.614583  
15,1,20030.027174  
15,1,3487.707317  
15,1,55223.562500  
15,1,29108.436275  
15,1,23622.154605  
15,1,1913.070312  
15,1,126237.255556  
15,1,1915.508523  
15,1,5780.446809  
15,1,1636.878472  
15,1,4357.136364  
15,1,6146.766447  
15,1,1628.738971  
15,1,3144.573370  
15,1,49328.547619  
15,1,5383.875000  
15,1,2393.656250  
15,1,23596.247024  
15,1,59687.132353  
15,1,93504.608108  
15,1,44857.310976  
15,1,14695.094388  
15,1,120085.536585  
15,1,4162.000000  
15,1,4029.153061  
15,1,1746.250000  
15,1,2008.071429  
15,1,142564.702128  
15,1,22765.323276  
15,1,63418.555556  
15,1,89632.885417  
15,1,2250.568750  
15,1,183191.500000  
15,1,10261.352564  
15,1,2288.860465

15,1,1904.350000  
15,1,2714.107143  
15,1,3117.450000  
15,1,2365.360000  
15,1,101979.403061  
15,1,1567.948980  
15,1,7614.039634  
15,1,1511.526042  
15,1,1544.312500  
15,1,2797.583333  
15,1,64122.782895  
15,1,68154.014286  
15,1,11461.470930  
15,1,5682.072368  
15,1,1612.146341  
15,1,3639.666667  
15,1,50563.000000  
15,1,1690.066860  
15,1,2390.781250  
15,1,4106.265957  
15,1,1683.945946  
15,1,1595.111413  
15,1,1907.250000  
15,1,36961.622995  
15,1,3098.317708  
15,1,48987.823718  
15,1,20905.507813  
15,1,2592.954545  
15,1,43796.371429  
15,1,7500.033854  
15,1,61258.037791  
15,1,3037.046053  
15,1,3586.952128  
15,1,157967.866667  
15,1,3788.572917  
15,1,3364.041667  
15,1,1924.600000  
15,1,1608.800000  
15,1,2015.230769  
15,1,7281.625000  
15,1,1906.899390  
15,1,6431.691176  
15,1,3127.333333  
15,1,1951.760135  
15,1,12577.557692  
15,1,5169.226190  
15,1,3038.563953  
15,1,64309.878378  
15,1,117328.209375  
15,1,4782.265000  
15,1,1702.433333  
15,1,2372.171875  
15,1,2232.219512  
15,1,103043.214286  
15,1,5880.333333  
15,1,56753.598485  
15,1,17713.975000  
15,1,46358.279070  
15,1,2187.708333  
15,1,18432.812500  
15,1,1724.255319  
15,1,6795.065217  
15,1,2063.437500  
15,1,10540.000000  
15,1,6247.193182  
15,1,1603.828125

15,1,1535.521341
[truncated: 1,935,522 more chars]
