# Supplementary material for: Selective Moonlighting Cell-Penetrating Peptides
Source: Pharmaceutics. 2021 Jul 22;13(8):1119. doi: 10.3390/pharmaceutics13081119 (PMC8400200; doi:10.3390/pharmaceutics13081119)
Supplement: Supplementary file 1 [file pharmaceutics-13-01119-s001.zip › TableS2.pdf]

Supplemental Data for the work entitled "Selective Moonlighting Cell-Penetrating Peptides" by Rafael Morán-Torres, David A. Castillo González, Beatriz Aguilar Maldonado, Maria Luisa Durán-Pastén, Susana Castro-Obregon & Gabriel Del Rio

Table S2 A) Intensity recorded for peptide alpha-NLS-C on MATa and MATalpha cells. MATa recordings correspond with odd Time numbers, and MATalpha with even Time numbers

Time,GroupByColor,Intensity

1,1,11121.2857142857  
1,1,9039.8467741936  
1,1,5807.2222222223  
1,1,6719.3735955056  
1,1,17616.0192307693  
1,1,17693.6607142858  
1,1,5628.9156976744  
1,1,5640.5  
1,1,9106.8954545454  
1,1,11427.2321428572  
1,1,14737.9999999999  
1,1,19642.234375  
1,1,7502  
1,1,7009.9811320756  
1,1,5177.8781250001  
1,1,8541.9855769231  
1,1,17606.5512820511  
1,1,19613.4615384616  
1,1,5262.6576086957  
1,1,7803.7872340427  
1,1,9519.0212765959  
1,1,15654.1684782608  
1,1,5744.6500000001  
1,1,11451.6306306307  
1,1,15963.3858695651  
1,1,12627.7619047617  
1,1,10290.6466346156  
1,1,6169.4703389831  
1,1,5445.4166666666  
1,1,5606.203488372  
1,1,6776.7529069769  
1,1,9684.4267782426  
1,1,7691.1540697675  
1,1,8190.9335106383  
1,1,8232.8826530613  
1,1,6401.6458333334  
1,1,9154.9166666666  
1,1,5694.8614130434  
1,1,5885.0592105265  
1,1,8397.0921052632  
1,1,8951.5833333333  
1,1,16145.7499999998  
1,1,5381.75  
1,1,15697.2560975608  
1,1,5641.0330188679  
1,1,6510.0000000001  
1,1,16948.1614583332  
1,1,7950.0539772729  
1,1,7750.475  
1,1,7601.4137931034  
1,1,5695.0184426231  
1,1,9947.4600000002  
1,1,8374.0664893618  
1,1,7966.6675000001  
1,1,6687.5539772729  
1,1,5206.3421052632  
1,1,5269  
1,1,5385.7692307693  
1,1,5758.9166666665  
1,1,6973.3909090909  
1,1,10016.5096153847  
1,1,8859.5238095238

1,1,10499.9523809525  
1,1,17929.4525000001  
1,1,7519.6041666666  
1,1,5718.5714285714  
1,1,6357.8780487805  
1,1,6449.6923076924  
1,1,5517.75  
1,1,5353.8392857143  
1,1,15642.6153846155  
1,1,14920.5735294118  
1,1,5790.0555555556  
1,1,5567.3687500001  
1,1,5133.2105263158  
1,1,5114.7774390244  
1,1,6908.037037037  
1,1,6794.8262711866  
1,1,12099.3953488371  
1,1,13094.53125  
1,1,6780.6861702128  
2,2,5428.6818181818  
2,2,5900.2021276595  
2,2,6675.6627906975  
2,2,7125.4934210526  
2,2,5288.0222222221  
2,2,7286.3068181817  
2,2,6158.5  
2,2,5701.1250000001  
2,2,9876.202380952  
2,2,5493.8555555555  
2,2,8253.9085365852  
2,2,5788.5955882352  
2,2,7339.5333333335  
2,2,6852.5348837209  
2,2,5236.2255434784  
2,2,5027.9107142857  
2,2,10484.4999999999  
2,2,5746.3174999999  
2,2,6716.8333333333  
2,2,7435.277173913  
2,2,5304.3333333333  
2,2,6085.8260869565  
2,2,5303.35  
2,2,7173.6891891892  
2,2,10667.4305555554  
2,2,6287.7583333334  
2,2,8047.0288461539  
2,2,5687.3365384616  
2,2,5297.9500000001  
2,2,13008.4732142855  
2,2,8180.2071428571  
2,2,6281.1463414635  
2,2,7405.4857142857  
2,2,5848.0909090911  
2,2,5019.3272058824  
2,2,7666.5841836735  
2,2,5480.3344594594  
2,2,5264.0738636363  
3,1,5825.6493902437  
3,1,7239.9000000002  
3,1,16140.5  
3,1,5770.3375  
3,1,5068.7325581395  
3,1,7045.1555555556  
3,1,8779.5977653632  
3,1,6217  
3,1,13406.3714285715

3,1,8071.2836538462  
3,1,15095.29999999997  
3,1,5887.4772727272  
4,2,6796.8333333334  
4,2,5095.8443396226  
4,2,6283.4375  
4,2,7713.8571428572  
4,2,7641.9078947368  
4,2,7021.4802631576  
4,2,7909.2195121952  
4,2,7774.4886363637  
4,2,12650.5064102564  
4,2,6372.3333333333  
4,2,7751.3333333334  
4,2,5284.8372093023  
4,2,6635.3482758621  
4,2,5189.9736842105  
4,2,6874.7729591838  
5,1,16161.5147058825  
5,1,15912.588235294  
5,1,5634.1081081081  
5,1,5176.8894230769  
5,1,14254.6015625  
5,1,5693.1363636364  
5,1,9306.3125000001  
6,2,5949.8902439025  
6,2,5505.659574468  
6,2,5708.7763157895  
6,2,5838.1249999999  
6,2,5371.3653846154  
6,2,5536.9505813953  
6,2,5028.5390625  
7,1,5106.375  
7,1,5113.023255814  
7,1,5298.3372641509  
7,1,6761.1428571428  
7,1,7300.0588235293  
7,1,6413.4274193547  
7,1,5376.5104166667  
7,1,6833.4194915256  
7,1,11455.4634146342  
7,1,10172.5862068965  
8,2,5832.7926136364  
8,2,10090.7881355932  
8,2,5153.8611111111  
8,2,8663.5999999999  
8,2,10385.8562500001  
8,2,6017.4583333333  
8,2,7536.75  
8,2,8633.9510869564  
8,2,5919.6857142857  
8,2,6080.6824324324  
8,2,5962.0024509805  
8,2,7526.2670454546  
8,2,11568.8604651161  
9,1,12505.7619047618  
9,1,18732.2941176471  
9,1,9065.0000000001  
9,1,5275.0625  
9,1,5031.6576086957  
9,1,7923.7971698115  
9,1,6036.1891891892  
9,1,10455.8139534885  
9,1,5855.6339285714  
9,1,13076.7774390242  
9,1,5538.75

9,1,7002.4375  
9,1,19333.6249999999  
9,1,6045.1136363636  
9,1,7629.8749999999  
9,1,5376.125  
9,1,17264.1775000002  
9,1,10882.8578431374  
9,1,6906.09375  
9,1,5621.9713541667  
9,1,5088.9249999998  
9,1,5380.5750000001  
9,1,5185.3571428571  
9,1,12171.1279761904  
9,1,10877.8333333335  
9,1,6557.2884615385  
9,1,6553.1535714285  
9,1,10433.2228260869  
9,1,8344.4967948718  
9,1,6102.3292682928  
9,1,7692.7499999999  
9,1,15997.9618055556  
9,1,5090.9285714286  
9,1,6223.9705882354  
9,1,6370.5000000001  
9,1,6689.5833333332  
9,1,5454.9044117647  
9,1,19714.5833333334  
9,1,10638.5846153843  
9,1,5099.5151515151  
9,1,5372.85  
9,1,5380.2391304347  
9,1,5576.2500000002  
9,1,16264.5540540539  
10,2,7049.4880952381  
10,2,6976.9873188407  
10,2,10404.00625  
10,2,6187.857142857  
10,2,5274.4155405405  
10,2,5945.6249999998  
10,2,6229.1139705882  
10,2,6823.9024390243  
10,2,5358.3461538461  
10,2,5173.7619047619  
10,2,5658.9318181817  
10,2,10650.5108695654  
10,2,6609.8452380953  
10,2,8171.3750000001  
10,2,5713.4642857144  
10,2,5985.0951086957  
10,2,6813.7213541667  
10,2,6673.4411764707  
10,2,8402.7499999999  
10,2,6976.4406779659  
10,2,6480.181372549  
10,2,5882.5918367348  
10,2,5055.9705882353  
10,2,7940.6006097561  
10,2,7787.5714285711  
10,2,5709.8571428572  
10,2,5234.4308510636  
10,2,5016.726744186  
10,2,6118.425  
10,2,5093.9054054055  
11,1,12300.8537234041  
11,1,17372.0849999999  
11,1,5265.9545454545

11,1,11152.1874999998  
11,1,5958.8571428571  
11,1,5285.625  
11,1,6210.3676470588  
11,1,9375.4540816326  
11,1,5381.2313829787  
11,1,5924.5612244897  
11,1,5504.28  
11,1,14664.840909091  
11,1,17798.7272727274  
11,1,17119.4735576923  
11,1,6814.9797297297  
11,1,6598.4444444445  
11,1,9900.7440476189  
11,1,5846.3718749999  
11,1,5141.3928571428  
11,1,7089.8965517241  
11,1,7224.1999999999  
11,1,6688.0919117648  
11,1,5696.019736842  
11,1,5448.35  
11,1,6917.8285714286  
11,1,5231.1815789474  
11,1,11013.8981481482  
11,1,5126.9767441861  
11,1,15168.4545454547  
11,1,5506.6544117647  
11,1,12094.0150000001  
11,1,19945.956395349  
11,1,15418.9387755101  
11,1,14404.256818182  
11,1,14834.9545454539  
11,1,10192.2102272728  
11,1,9210.6785714285  
11,1,5064.9583333333  
11,1,9068.8571428571  
12,2,5860.6000000001  
12,2,7796.7624999999  
12,2,6531.2340425532  
12,2,5396.5416666666  
12,2,5287.9479166667  
12,2,5459.511627907  
12,2,8363.1057692308  
12,2,6399.5029761905  
12,2,5707.2692307693  
12,2,5625.8465909091  
12,2,5162.2580645161  
12,2,5252.3  
12,2,6196.7467948717  
12,2,7683.9907407408  
12,2,5082.9642857144  
12,2,5994.375  
12,2,5939.3602941177  
12,2,6856.5609756099  
12,2,6278.4772727273  
12,2,6200.2884615385  
12,2,5903.7218750001  
12,2,5054.875  
13,1,5330.6611842104  
13,1,5958.5224999998  
13,1,5193.8315217392  
13,1,9059.7083333333  
13,1,16070.1200000001  
13,1,11057.0952380951  
13,1,6440.798611111  
13,1,12160.2222222223

13,1,5032.7291666667  
13,1,18908.9825581394  
13,1,5510.5625  
13,1,5242.3030303031  
13,1,13835.5625000001  
13,1,18632.6666666666  
13,1,16967.5364583333  
13,1,5224.0238095239  
13,1,19052.7722222222  
13,1,8093.3537735849  
13,1,17411.3413461538  
13,1,5207.5324074075  
13,1,15625.201923077  
13,1,14968.7500000002  
13,1,5018.1470588235  
13,1,6664.080882353  
14,2,7556.328125  
14,2,7858.6071428572  
14,2,5445.25  
14,2,9556.2819148936  
14,2,8545.2105263157  
14,2,5811.5476190476  
14,2,5172.5625000002  
14,2,5261.515625  
14,2,5017.8421052631  
14,2,5710.955357143  
14,2,8455.9102564103  
14,2,7093.6818181819  
14,2,6618.0535714285  
14,2,5526.25  
14,2,6153.05  
14,2,6328.4575000001  
14,2,7812.4852941176  
15,1,15546.5478723406  
15,1,6927.975  
15,1,5665.7375  
15,1,5861.3000000001  
15,1,5966.4852941177  
15,1,5404.2974137932  
15,1,11861.8014705884  
15,1,6080.9816176471  
15,1,6066.893939394  
15,1,12652.44  
15,1,5316.4114583334  
15,1,6958.5484693878  
15,1,8431.2105263158  
15,1,11473.2575757575  
15,1,19014.051724138  
15,1,6228.0357142858  
15,1,5423.1858108109  
16,2,5732.8835227273  
16,2,5910.4111111112  
16,2,6285.3944444444  
16,2,7896.9476744185  
16,2,5757.36  
16,2,7375.3928571428  
16,2,5343.8239795919  
17,1,16629.2840909092  
17,1,5790.75  
17,1,10627.0212765956  
17,1,15129.125  
17,1,10754.1818181816  
17,1,6737.975  
17,1,16591.9360465117  
17,1,13253.2259615383  
17,1,14255.5588235295

17,1,13581.9695121954  
17,1,9785.5094339621  
17,1,15321.2958333333  
17,1,10826.6621621622  
17,1,15504.4595588236  
17,1,5788.059375  
17,1,15470.8881578946  
17,1,5817.2340425533  
17,1,17727.2692307693  
17,1,5524.875  
17,1,10032.9500000001  
17,1,11037.25  
17,1,7026.3676470588  
17,1,12737.5374999999  
17,1,13581.6999999999  
17,1,19603.5568181819  
17,1,14003.1707317072  
17,1,10036.3750000002  
17,1,19047.6875  
17,1,14770.2083333337  
17,1,11670.5572916666  
17,1,5484.2117346939  
17,1,9654.4324324324  
17,1,16771  
17,1,10606.1120689656  
17,1,17433.721153846  
17,1,15884.5  
17,1,5398.190625  
17,1,11485.5878378378  
17,1,19049.2567567567  
17,1,16314.3693181816  
17,1,6832.7556818181  
17,1,17847.3993055555  
17,1,7328.195945946  
17,1,5465.875  
17,1,9344.6352040816  
17,1,16157.5  
17,1,16072.375  
17,1,11578.625  
17,1,8098.7928571428  
17,1,5144.9333333333  
17,1,15201.9921875  
17,1,10336.6369047618  
17,1,6568.8749999999  
17,1,5525.9386363636  
17,1,16494.419117647  
17,1,16330.3658536587  
17,1,9201.4144736843  
17,1,6601.5999999999  
17,1,5912.8295454544  
18,2,6129.5520833333  
18,2,5054.4761904762  
18,2,6193.9583333334  
18,2,5286.8562499999  
18,2,6715.1805555556  
18,2,7014.7715517242  
18,2,5542.4967105263  
18,2,6299.1439393939  
18,2,6211.8684210527  
18,2,9376.5499999999  
18,2,7653.4714285715  
18,2,5908.3250000001  
18,2,7231.0588235295  
18,2,5677.5520833334  
18,2,13517.9539473686  
18,2,7572.8878205128

18,2,5165.1049107144  
18,2,6127.8411458334  
18,2,5756.6309523811  
18,2,5444.1853448276  
18,2,6087.5426829269  
18,2,6652.5482954546  
18,2,5141.231707317  
18,2,5500.7500000001  
18,2,5004.8989361703  
19,1,9680.25  
19,1,5334.3846153846  
19,1,15118.7307692308  
19,1,5860.9510869564  
19,1,6115.75  
19,1,14307.6571428571  
19,1,12838.0285714286  
19,1,7187.0714285715  
19,1,5709.4245283019  
19,1,16450.8482142859  
19,1,5554.375  
19,1,16036.875  
19,1,18977.2567567566  
19,1,18321.8333333334  
19,1,7610.1276595744  
19,1,10568.0384615384  
19,1,8582.5  
19,1,7068.9166666667  
19,1,15075.15625  
19,1,14420.3076923078  
19,1,19756.2022058825  
19,1,12445.1451612904  
19,1,14695.8269230766  
19,1,15022.2095588237  
19,1,10024.3825757576  
19,1,5510.6458333333  
19,1,10125.20754717  
19,1,5043.83984375  
19,1,18072.4594594595  
19,1,13390.3630952381  
19,1,17751.6216216215  
19,1,5877.2091836735  
19,1,10239.25  
19,1,16263.8111111111  
19,1,16788.4324324324  
19,1,5140.5454545452  
19,1,18530.2312500002  
19,1,6497.1524390244  
19,1,13506.1470588234  
19,1,7141.3405172413  
19,1,17839.5914634144  
19,1,8970.5312499999  
19,1,7891.131097561  
19,1,5130.3869047618  
19,1,14077.2132352941  
19,1,8593.5147058824  
19,1,18234.7297297298  
19,1,5098.3443396227  
19,1,19426.2007575759  
19,1,18560.8262195123  
19,1,6517.1250000001  
19,1,7548.7794117648  
19,1,9104.625  
19,1,11666.75  
19,1,17799.867647059  
19,1,13931.25  
19,1,10698.7727272727

19,1,18097.4155405407  
19,1,17934.4921875  
20,2,8454.9758064517  
20,2,8011.5975609757  
20,2,5856.3970588236  
20,2,7724.5384615385  
20,2,5021.6148648648  
20,2,7466.884375  
20,2,5329.2279411765  
20,2,6622.5657894737  
20,2,5526.8467741936  
20,2,7033.6666666666  
20,2,10119.4448529411  
20,2,5603.9444444445  
20,2,7445.7884615385  
20,2,5190.7647058823  
20,2,9225.01171875  
20,2,9792.1015625  
20,2,6658.8388157894  
20,2,6621.6470588235  
20,2,9649.741935484  
20,2,7163.2214285714  
20,2,7225.1507352941  
20,2,7774.4615384616  
20,2,8561.75  
20,2,6678.3378378379  
20,2,5256.9276315789  
20,2,5888.3552631579  
20,2,6617.6631944444  
20,2,9740.4886363637  
20,2,8193.2352941176  
20,2,6731.8235294117  
20,2,7121.8124999999  
21,1,11995.4743589744  
21,1,10540.747340425  
21,1,14281.9659090909  
21,1,14428.8333333334  
21,1,14736.7708333331  
21,1,8336.1416666667  
21,1,15133.884868421  
21,1,17634.6532258066  
21,1,6596.8557692308  
21,1,12077.3602941176  
21,1,15779.403409091  
21,1,5538.1627906975  
21,1,6005.62890625  
21,1,5774.4547872341  
21,1,9674.1707317071  
21,1,14856.6250000001  
21,1,11050.3039772724  
21,1,5787.8125  
21,1,7400.9117647058  
21,1,13590  
21,1,17149.4072580646  
21,1,9322.947368421  
21,1,5367.01953125  
21,1,6297.136904762  
21,1,9877.5914634148  
21,1,7166.1875  
21,1,18256.6585365852  
21,1,7619.6829268291  
21,1,6416.8076923078  
21,1,15471.9285714286  
21,1,6226.75625  
21,1,16055.1818181817  
21,1,19612.7894736843

21,1,16084.1572580645  
21,1,7125.9375  
21,1,9515.1904761904  
21,1,7857.7620967741  
21,1,19377.3967391304  
21,1,9188.2678571429  
21,1,5086.6379310345  
21,1,11330.8333333332  
21,1,10993.572368421  
21,1,16567.7941176472  
21,1,10825.1190476192  
21,1,18699.2651515151  
21,1,10793.1785714286  
21,1,9367.1682692307  
21,1,5362.2420212766  
21,1,10371.2794117647  
21,1,14193.400735294  
21,1,8244.5731707317  
21,1,14765.1250000001  
21,1,5092.2867647059  
21,1,12627.0735294117  
21,1,11551.640625  
21,1,18357.5168918922  
21,1,12864.51171875  
21,1,19218.9479166666  
21,1,5992.2604166667  
22,2,5662.3658536586  
22,2,5443.0531914893  
22,2,8022.6999999999  
22,2,7369.0810810812  
22,2,5465.7822580645  
22,2,5255.2526595745  
22,2,5186.2797619049  
22,2,5859.9761904762  
22,2,6325.0073529411  
22,2,5435.6686046512  
22,2,8498.7692307692  
22,2,5456.3175675676  
22,2,5101.2058823529  
22,2,6805.5192307692  
23,1,9178.1515151515  
23,1,5434.8  
23,1,6284.0681818182  
23,1,5993.6666666665  
23,1,11802.6465517242  
23,1,13461.0201612904  
23,1,7544.6838235294  
23,1,17078.7647058823  
23,1,8671.6509433962  
23,1,9409.4166666664  
23,1,12208.3092105264  
23,1,6475.744047619  
23,1,18085.484848485  
23,1,9775.2812499998  
23,1,19738.9999999999  
23,1,17536.7499999998  
23,1,19513.5493421054  
23,1,19327.1644736843  
23,1,18808.3781249999  
23,1,11215.1428571428  
23,1,8749.7880434783  
23,1,17003.3157894738  
23,1,12493.3749999999  
23,1,14336.4047619049  
23,1,17863.783333333  
23,1,11018.8382352942

23,1,19880.784722222  
 23,1,16786.1750000001  
 23,1,13699.2419354839  
 23,1,8973.2083333332  
 23,1,18912.7348484847  
 23,1,12601.7272727272  
 23,1,11897.5750000001  
 23,1,18852.6451612903  
 23,1,15617.4999999999  
 23,1,5366.2857142857  
 23,1,17697.7426470585  
 23,1,15430.3823529411  
 23,1,6186.2553191489  
 23,1,14048.705882353  
 23,1,10196.5865384615  
 23,1,14650.3166666667  
 24,2,5060.609375  
 24,2,7209.3333333333  
 24,2,6858.1727941177  
 24,2,7032.3541666666  
 24,2,5191.7261904763  
 24,2,5118.14  
 24,2,5306.6875  
 24,2,7247.9487179488  
 24,2,7356.6442307692  
 24,2,5170.3378378379  
 24,2,6293.4448529411  
 24,2,5015.8333333333  
 24,2,5861.2340425532  
 24,2,7447.3194444444

Table S2 B) Intensity recorded for peptide NLS-alpha-CE on MATa and MATalpha cells. MATa recordings correspond with odd Time numbers, and MATalpha with even Time numbers

Time,GroupByColor,Intensity

1,1,8551.1333333333  
 1,1,9080.0460526315  
 1,1,8079.4517045453  
 1,1,6021.4114583335  
 1,1,15971.1627906973  
 1,1,8825.3000000001  
 1,1,5710.9651162792  
 1,1,8360.120614035  
 1,1,19925.6130952382  
 1,1,5994.7820512821  
 1,1,9492.1774999998  
 1,1,5950.5813953489  
 1,1,12517.5263157894  
 1,1,19936.6929347827  
 1,1,5505.6999999999  
 1,1,5887.6413043478  
 1,1,8834.2863636365  
 1,1,6103.5847457627  
 1,1,5311.8723404256  
 1,1,7388.4249999999  
 1,1,12373.0036764705  
 1,1,5708.475  
 1,1,5531.2159090909  
 1,1,5243.2500000001  
 1,1,5416.8974358974  
 1,1,5246.75  
 1,1,6055.8505434783  
 1,1,5778.9431818181  
 1,1,5326.0600961539  
 1,1,8230.8837209302  
 1,1,7807.5897435897  
 1,1,5213.3061224491

1,1,5903.4635416667  
1,1,6467.0570652175  
1,1,9757.5816326531  
1,1,12450.4298245613  
1,1,10243.17  
1,1,6049.3406249999  
1,1,6556.641025641  
1,1,5088.3046875  
1,1,10507.740909091  
1,1,5969.9725  
1,1,7829.9999999999  
1,1,7317.6875  
1,1,5297.8275862069  
1,1,9413.3425925926  
1,1,6309.8537234041  
1,1,7215.9565217392  
1,1,6112.3055555556  
1,1,5386.2272727273  
1,1,6323.8641304347  
1,1,8862.731707317  
1,1,9306.5555555556  
1,1,6595.303030303  
1,1,12131.320945946  
1,1,13362.3452380952  
1,1,11071.9895833334  
1,1,9865.0164473683  
1,1,8756.9781249999  
1,1,8692.3809523811  
1,1,5916.7754491018  
1,1,5045.7  
1,1,5533.7959183672  
1,1,8792.5425531914  
1,1,7332.3124999999  
1,1,11285.195945946  
1,1,6822.6666666666  
1,1,16364.63671875  
1,1,7118.8437500001  
1,1,6210.25  
1,1,9278.1960227273  
1,1,7177.5625  
1,1,5320.2965116279  
1,1,11319.3884297521  
1,1,5197.625  
1,1,7270.4000000001  
1,1,10159.2820512817  
1,1,5021.0081967214  
1,1,17603.6217105264  
1,1,7128.7285714285  
1,1,6187.5000000002  
1,1,7745.5031249999  
1,1,15684.5909090908  
1,1,5741.8333333334  
1,1,10951.3333333335  
1,1,10294.1750000001  
1,1,7517.032894737  
1,1,6353.8885869567  
1,1,5471.7  
1,1,10670.95  
1,1,6684.5106382978  
1,1,7641.40625  
1,1,5813.5660377359  
1,1,6932.5972222223  
1,1,10720.3749999999  
1,1,5049.7579787234  
1,1,7614.681818182  
1,1,7319.5190677966

1,1,11563.9006410256  
1,1,5271.47  
1,1,13779.6833333332  
1,1,7087.5396341464  
1,1,5927.3111111111  
1,1,12350.8794642857  
1,1,5583.5666666665  
1,1,10952.4809782607  
1,1,5287.7264150943  
1,1,5420  
1,1,5047.0641891892  
1,1,8145.8125  
1,1,11604.0090909089  
1,1,5091.3380681818  
1,1,6536.5957446808  
1,1,5921.8111702128  
1,1,17513.6874999995  
1,1,6252.3516949152  
1,1,7690.1428571428  
1,1,9226.5138888889  
1,1,7797.7395833334  
1,1,6824.441860465  
1,1,7858.2745098038  
1,1,7812.6785714285  
1,1,9980.0884146342  
1,1,9454.8233695652  
1,1,7758.4732142858  
1,1,5954.3749999999  
1,1,5236.4594594595  
1,1,5448.4875000001  
1,1,6418.7674418605  
1,1,9888.4097222224  
1,1,16075.4732142856  
1,1,13024.6999999998  
1,1,7322.7093750001  
1,1,11809.3333333334  
1,1,15066.6382978721  
1,1,6125.5625000001  
1,1,7899.1488095238  
1,1,15906.5049019606  
1,1,8652.7159090911  
1,1,16560.0238095239  
1,1,6133.1489361703  
1,1,9077.9192708333  
1,1,10019.3642857143  
1,1,5460.0499999998  
1,1,6192.0681818181  
1,1,12556.1071428571  
1,1,11697.7738095237  
1,1,6804.4438775507  
1,1,17269.4821428569  
1,1,18444.8014705885  
1,1,17772.4857142858  
1,1,6114.169871795  
1,1,8262.045138889  
1,1,6377.8680555555  
1,1,10295.4000000002  
1,1,6243.8260869565  
1,1,11380.9791666667  
1,1,5831.9451219513  
1,1,6125  
1,1,9444.5625  
1,1,18861.0372340425  
1,1,5830.2107843137  
1,1,5421.8377659574  
1,1,5970.296875

1,1,5072.4847560974  
1,1,7304.1951219512  
1,1,6246.4000000001  
1,1,8741.5  
1,1,8052.6335227273  
1,1,5072.5656250001  
1,1,5898.8382352941  
1,1,14896.3815789476  
1,1,7757.1145833333  
1,1,5441.2978723404  
1,1,5117.25  
1,1,10314.0957446808  
1,1,6709.6249999998  
1,1,8404.9187499998  
1,1,13569.8367346943  
1,1,5933.8297872339  
1,1,5919.3333333332  
1,1,11491.7375000002  
1,1,16198.2118055554  
1,1,15264.7586206897  
1,1,7194.4134615386  
1,1,7146.5375000002  
1,1,19248.0000000001  
1,1,7986.21875  
1,1,5086.0585106382  
1,1,6313.3404255318  
1,1,7251.7441860466  
1,1,8530.8333333333  
1,1,5815.6842105264  
1,1,9212.5549999999  
1,1,6508.825  
1,1,10533.3392857143  
1,1,5363.4329268293  
1,1,5798.4166666665  
1,1,15213.0691489358  
1,1,10479.5116279072  
1,1,5058.0174418604  
1,1,5234.0512820513  
1,1,6711.9464285715  
1,1,10012.3782051283  
2,2,5525.1874999998  
2,2,5923.3055555555  
2,2,5183.5365853658  
2,2,8332.9318181819  
2,2,8278.3676470589  
2,2,6054.6666666669  
2,2,5502.4274193549  
2,2,11775.7727272726  
2,2,5447.0729166666  
2,2,8496.9968749999  
2,2,5520.0263157895  
2,2,5015.2043269231  
2,2,10452.4891304348  
2,2,5185.3083333334  
2,2,5768.6023391812  
2,2,5372.5914634146  
2,2,5401.8963414634  
2,2,5656.9107142856  
2,2,9242.3387096774  
2,2,8520.5760869568  
2,2,5434.0065789474  
2,2,6244.005988024  
2,2,8494.1398809524  
2,2,5282.0363636363  
2,2,7215.5525  
2,2,6882.0188679246

2,2,8034.5649038461  
2,2,5498.1162790698  
2,2,6306.9387755103  
2,2,6289.554054054  
2,2,6912.2430555556  
2,2,5252.2499999999  
2,2,9638.7232142858  
2,2,7727.2222222223  
2,2,6268.5555555555  
2,2,5285.3962264151  
2,2,8064.7659574468  
2,2,6565.484375  
2,2,6177.892857143  
2,2,8170.4375000001  
2,2,6884.4652777777  
2,2,5386.2675000001  
2,2,10120.1413043477  
2,2,8366.8555555555  
2,2,5532.4999999999  
2,2,7555.1764705881  
2,2,8056.4763513514  
2,2,8509.1578947368  
2,2,6019.8205128204  
2,2,5938.7039473684  
2,2,6648.0094339625  
2,2,5941.359375  
2,2,6746.9427083334  
2,2,5141.2130681819  
2,2,6235.3783783784  
2,2,6611.3181818183  
2,2,5887.32  
2,2,8906.6587837838  
2,2,6390.0391566265  
2,2,7232.8333333334  
2,2,6796.5  
2,2,9766.0581395347  
2,2,5269.5833333333  
2,2,7713.9038461538  
2,2,5375.5319148935  
2,2,7019.5971074381  
2,2,5655.59375  
2,2,5094.5135135135  
2,2,5081.6136363637  
2,2,7030.590909091  
2,2,6298.3125  
2,2,5693.4999999999  
2,2,5801.5128205128  
2,2,8838.8962264151  
2,2,11898.5  
2,2,5301.9821428572  
2,2,6160.0306122449  
2,2,5343.9591836734  
2,2,5306.3255813953  
2,2,6734.2660256409  
2,2,5757.8018292683  
2,2,5687.7241379311  
2,2,5515.8991228071  
2,2,7368.4390243902  
2,2,5319.3368644068  
2,2,7102.1818181817  
2,2,6405.1914893618  
2,2,5513.6611842106  
2,2,8597.8510638297  
2,2,8527  
2,2,6354.5843750001  
2,2,5568.2926829269

2,2,8429.6375  
2,2,5047.6692708334  
2,2,7761.125  
2,2,7826.8803191491  
2,2,5065.8484042553  
2,2,5418.8288043479  
2,2,7559.3125000001  
2,2,5284.8653846153  
2,2,5636.2162162162  
2,2,6178.3214285714  
2,2,6108.09  
2,2,7646.34375  
2,2,6442.1346153847  
2,2,6301.9558823529  
2,2,10557.1875  
2,2,5636.2604166667  
2,2,5144.7361111111  
2,2,5301.3175675676  
2,2,5637.5337837838  
2,2,8410.0714285713  
2,2,7513.3793103448  
2,2,7565.6515957447  
2,2,5365.7732558138  
2,2,5021.7708333336  
2,2,5880.1794871796  
2,2,6627.6611111112  
2,2,5181.6625  
2,2,7871.0625  
3,1,18328.9200913242  
3,1,5353.7870370371  
3,1,7332.9375  
3,1,6584.5405405407  
3,1,5470.6972222223  
3,1,13427.1335227274  
3,1,8799.8430232558  
3,1,10153.2180094788  
3,1,5430.8596938776  
3,1,9463.8181818181  
3,1,6133.1666666666  
3,1,5542.75  
3,1,7983.9679487179  
3,1,13189.130208333  
3,1,13212.3977272727  
3,1,8202.8076923077  
3,1,6739.6250000001  
3,1,8738.0454545453  
3,1,5006.6976744187  
3,1,9140.25  
3,1,7349.5729166667  
3,1,7755.585526316  
3,1,6079.471590909  
3,1,5303.7379032258  
3,1,8692.9401197604  
3,1,10321.78125  
3,1,5003.846875  
3,1,5264.1395348837  
3,1,5700.2058823529  
3,1,7448.4097222221  
3,1,5802.2642045454  
3,1,9954.1764705883  
3,1,5803.1902173913  
3,1,5268.0208333333  
3,1,8818.7735849056  
3,1,5220.85  
3,1,5204.4431818183  
3,1,6124.6151315788

3,1,5307.0518518519  
3,1,5514.0500000002  
3,1,5124  
3,1,7309.0188679246  
3,1,6891.3604651162  
3,1,6752.0804020101  
3,1,8055  
3,1,7556.5740740742  
3,1,7147.717948718  
3,1,19396.8662790699  
3,1,6696.8574999999  
3,1,12598.1402439024  
3,1,6477.2453703705  
3,1,6232.8363636365  
3,1,8144.6177884616  
3,1,5881.1791044775  
3,1,6513.2631578948  
3,1,8052.4351851852  
3,1,16759.820121951  
3,1,13396.5601851847  
3,1,16649.0762711866  
3,1,7123.8061224489  
3,1,14116.7109375  
3,1,5916.2272727273  
3,1,5243  
3,1,7885.3181818181  
3,1,5528.1644736841  
3,1,5620.846590909  
3,1,8783.9134615384  
3,1,12361.1357142858  
3,1,8074.2432432432  
3,1,5444.693877551  
3,1,6816.4  
3,1,6136.90625  
3,1,5402.7317073171  
3,1,5615.9864864864  
3,1,6100.7843137253  
3,1,14353.5000000007  
3,1,5530.2135416668  
3,1,5684.5638297872  
3,1,7553.956521739  
3,1,5059.2173913044  
3,1,5319.1739130434  
3,1,8667.1415094341  
3,1,9039.4078947367  
3,1,17117.4774999999  
3,1,13637.6702127659  
3,1,6245.2682926828  
3,1,7587.5333333334  
3,1,5156.875  
3,1,10613.75  
3,1,5126.9875  
3,1,9553.4871794873  
3,1,10581.0828877007  
3,1,14808.84375  
3,1,5724.3695652173  
3,1,7302.0731707316  
3,1,7166.5326086956  
3,1,6948.2916666667  
3,1,12748.652173913  
3,1,7266.1406249999  
3,1,5099.2916666668  
3,1,8286.1647727273  
3,1,6634.6160714285  
3,1,17862.9558823529  
3,1,5940.2674418605

3,1,7957.869047619  
3,1,5698.8897058823  
3,1,9489.3333333334  
3,1,6882.4893617022  
3,1,9018.8837209301  
3,1,5051.2763157895  
3,1,19941.7222222223  
3,1,9373.0585106385  
3,1,5963.1310975609  
3,1,19779.5562913906  
3,1,19177.625  
3,1,9512.6136363636  
3,1,6515.2115384615  
3,1,11054.5131578947  
3,1,6119.2994186046  
3,1,18716.6646341464  
3,1,6599.2426470587  
3,1,5462.6015625  
3,1,12503.078125  
3,1,9378  
3,1,12395.7053571429  
3,1,10547.0460526316  
3,1,6031  
3,1,7645.6489361703  
3,1,5462.0697674418  
3,1,9265.9999999999  
3,1,6710.4583333334  
3,1,7399.5  
3,1,5970.5771276596  
3,1,6525.7403846154  
3,1,6697.7837837838  
3,1,6808.8671875001  
3,1,9421.359375  
3,1,14652.984375  
3,1,5310.8055555555  
3,1,6251.90625  
3,1,7705.6482558141  
3,1,5226.5159574468  
3,1,7421.4621212121  
3,1,6619.5433673471  
3,1,5651.28125  
3,1,7815.8285714285  
3,1,18511.625000001  
3,1,5400.1193181817  
3,1,7103.2000000001  
3,1,5851.9204545454  
3,1,5602.0104166666  
3,1,11172.0534979421  
3,1,5804.7499999999  
3,1,9478  
3,1,15933.1399999999  
3,1,6020.8445121951  
3,1,10150.0539772733  
3,1,6330.8780487804  
3,1,9560.8529411766  
3,1,6722.0487804878  
3,1,7978.3031250001  
3,1,5479.9829545455  
3,1,5327.3333333334  
3,1,6751.5454545456  
3,1,5242.8085106383  
3,1,13715.031818182  
3,1,7112.6341463416  
3,1,5171.637755102  
3,1,6130.9870689656  
3,1,6640.7142857143

3,1,7735.7670454546  
3,1,6509.0585106385  
3,1,5090.9756097561  
3,1,17014.1646341464  
3,1,6311.3475  
3,1,6696.0081521738  
3,1,7501.8662790696  
3,1,9500.828125  
3,1,9191.553977273  
3,1,6555.4656250001  
3,1,6564.94375  
3,1,9954.9818181817  
3,1,6034.4296875  
3,1,16867.6041666664  
3,1,11685.328125  
3,1,5916.2524509803  
3,1,9914.4764150946  
3,1,12349.0555555554  
3,1,6680.5211864407  
3,1,6363.0697674419  
3,1,6909.011627907  
3,1,8871.2897727272  
3,1,6426.7784090908  
3,1,13378.3522727276  
3,1,5846.1696428572  
3,1,5702.6588541666  
3,1,7204.5396341465  
3,1,8002.2333333333  
3,1,6953.8125  
3,1,5439.7774999999  
3,1,5063.6947674418  
3,1,7335.6329787234  
3,1,8493.5387931035  
3,1,16647.8106060605  
3,1,7606.1914893618  
3,1,8563.1707317073  
3,1,5525.7764423077  
3,1,11585.9027777778  
3,1,5528.62  
3,1,10282.5927419354  
3,1,14030.5937499999  
3,1,17512.6999999998  
3,1,6284.0236486486  
3,1,7497.8110465117  
3,1,12278.1634615386  
3,1,12333.1802884614  
3,1,6368.3016304347  
3,1,6713.9000000001  
3,1,13842.4734042553  
3,1,14330.2631578947  
3,1,5551.8409090908  
3,1,7491.9542682925  
3,1,9670.4550898203  
3,1,6576.0681818184  
3,1,8349.7364130434  
3,1,8752.4075000002  
3,1,7519.0178571428  
3,1,6296.4814814815  
3,1,11919.46875  
3,1,5042.5  
3,1,9308.875  
3,1,7229  
4,2,5694.7727272726  
4,2,8723.9268292684  
4,2,6487.4893617023  
4,2,8398.9206349205

4,2,5045.1770833333  
4,2,5115.8809523808  
4,2,9062.8571428574  
4,2,7968.1500000001  
4,2,6112.4437499999  
4,2,5944  
4,2,8784.3695652174  
4,2,10032.2804878048  
4,2,6807.3658536586  
4,2,8047.1824324325  
4,2,9351.5869565216  
4,2,5385.0274390243  
4,2,5913.9523809525  
4,2,6629.4767441861  
4,2,8757.2835365852  
4,2,5049.4166666668  
4,2,10351.3472222225  
4,2,6857.5340909092  
4,2,5811.6923076924  
4,2,6201.780612245  
4,2,9838.4325  
4,2,5585.5670731707  
4,2,5734.8295454546  
4,2,11614.0762195123  
4,2,7313.1428571427  
4,2,6317.3070175439  
4,2,9672.9744897959  
4,2,5588.7015306122  
4,2,6487.6935483871  
4,2,5648.0548245614  
4,2,8372.8295454545  
4,2,5220.01875  
4,2,6557.0638297874  
4,2,7107.8372093024  
4,2,9991.2325581395  
4,2,7667.9166666666  
4,2,6382.1178571428  
4,2,7683.4102564102  
4,2,5747.6388888889  
4,2,8340.9772727273  
4,2,6924.3529411765  
4,2,14831.3333333333  
4,2,7367.3468750001  
4,2,11247.0892857143  
4,2,10687.7625000001  
4,2,7080.7023809524  
4,2,7859.25  
4,2,7135.8214285714  
4,2,6856.625  
4,2,7542.75  
4,2,9938.0178571429  
4,2,7850.4714285715  
4,2,5877.9147727272  
4,2,11211.375  
4,2,5961.2593750002  
4,2,5028.6136363637  
4,2,5790.625  
4,2,7497.9215116278  
4,2,5635.1524390244  
4,2,6079.4375  
4,2,8440.953125  
4,2,8547.2696078432  
4,2,5409.383152174  
4,2,7838.1891891892  
4,2,7260.6494565216  
4,2,10873.7281553398

4,2,9838.7142857143  
4,2,6951.7105263158  
4,2,10016.1463414633  
4,2,9847.6404494384  
4,2,6972.2558139534  
4,2,9030.1319444443  
4,2,10022.2275000001  
4,2,5295.1776315789  
4,2,5059.1197916667  
4,2,5968.1143617022  
4,2,12462.4318181819  
4,2,5837.6067708332  
4,2,9524.5370370369  
4,2,5238.0096153847  
4,2,7256.463888889  
4,2,5161.607142857  
4,2,7046.3255813954  
4,2,7779.6656249999  
4,2,6758.0425531915  
4,2,6028.3678571429  
4,2,6863.7872340427  
4,2,5651.5  
4,2,8149.5512820512  
4,2,7300.24  
4,2,6063.8125  
4,2,5758.4693877551  
4,2,5854.0217391304  
4,2,5042.8682432433  
4,2,6197  
4,2,5010.4651162791  
4,2,7642.8  
4,2,7442.6283783782  
4,2,8123.0518292684  
4,2,5156.328125  
4,2,7613.7333333334  
4,2,10037.5955882354  
4,2,5219.654109589  
4,2,5439.2378048781  
4,2,5385.1538461539  
4,2,5513.8749999999  
4,2,6917.1160714286  
4,2,9260.0432692309  
4,2,5789.0937500001  
4,2,7975.328125  
4,2,9331.7763157895  
4,2,6166.9308510638  
4,2,7038.4103260871  
4,2,5139.469387755  
4,2,10862.1448863636  
4,2,8073.5749999999  
4,2,7131.3333333332  
4,2,5162.9999999999  
4,2,5484.9099999999  
4,2,5533.7897727272  
4,2,7562.9673366834  
4,2,6145.3028846153  
4,2,5678.0255681818  
4,2,5523.552419355  
4,2,5507.3  
4,2,5331.5928961748  
4,2,6233.3529411764  
4,2,5395.4230769231  
4,2,6147.5833333334  
4,2,5773.0445544555  
4,2,6355.5754716981  
4,2,7006.6586538461

4,2,5753.3970588235  
4,2,7875.0749999999  
4,2,6214.0714285714  
4,2,8614.5  
4,2,5171.2443181818  
5,1,8644.84375  
5,1,7316.3231707316  
5,1,5620.955  
5,1,5310.2437499999  
5,1,15367.6462264151  
5,1,6398.625  
5,1,6385.671875  
5,1,9935.201530612  
5,1,10620.8611111111  
5,1,14203.7419354839  
5,1,5804.7819148937  
5,1,10028.98125  
5,1,7255.0833333335  
5,1,17710.1538461537  
5,1,14484.2209302327  
5,1,9175.0343750001  
5,1,17760.8785714287  
5,1,7063.1555555556  
5,1,6486.423076923  
5,1,8928.7067307691  
5,1,6262.4100877193  
5,1,5523.8055555556  
5,1,7338.2865853658  
5,1,5088.4302325581  
5,1,6437.7743055555  
5,1,6622.5  
5,1,6425.2200000001  
5,1,7283.034883721  
5,1,6266.0885416666  
5,1,18626.4687499995  
5,1,5115.7222222223  
5,1,6100.9147727275  
5,1,5828.1510416665  
5,1,11874.828125  
5,1,5067.3782894737  
5,1,9978.559090909  
5,1,8828.1517857144  
5,1,11879.39453125  
5,1,5152.751231527  
5,1,18581.558139535  
5,1,10935.7599999998  
5,1,5687.3343023256  
5,1,6124.7857142857  
5,1,6925.3833333334  
5,1,5905.4933333333  
5,1,8991.5930851063  
5,1,7656.935546875  
5,1,12232.2400000003  
5,1,9995.375  
5,1,5080.7258064516  
5,1,10604.8977272727  
5,1,5772.1744791669  
5,1,6707.3679245283  
5,1,8228.515625  
5,1,5875.909090909  
5,1,8822.9875  
5,1,6252.818181818  
5,1,7913.3653846153  
5,1,8503.9583333334  
5,1,6133.1666666666  
5,1,5198.9782608695

5,1,14773.5714285715  
5,1,6099.4361702127  
5,1,6594.2500000001  
5,1,5054.9467592594  
5,1,7642.25  
5,1,5676.7358490566  
5,1,5152.6981132076  
5,1,8168.5683962264  
5,1,6814.5333333332  
5,1,7004.0641025641  
5,1,9155.4146341462  
5,1,13354.2264150945  
5,1,5125.5000000001  
5,1,6816.78125  
5,1,5371.4951923078  
5,1,6980.2631578947  
5,1,10965.4972826089  
5,1,6946.7886904762  
5,1,6942.3125000001  
5,1,5384.159090909  
5,1,10331.6441717791  
5,1,5086.4309210527  
5,1,5364.8906249999  
5,1,8581.5624999999  
5,1,6993.6725  
5,1,13552.8125000001  
5,1,5616.7828947368  
5,1,10392.1796407185  
5,1,8933.4166666667  
5,1,14751.9062499997  
5,1,8064.0683962263  
5,1,11742.8875000001  
5,1,10823.3648648647  
5,1,5409.3372641512  
5,1,7606.0555555554  
5,1,7408.9010416668  
5,1,6121.0641025641  
5,1,5751.0588235294  
5,1,7058.9024390243  
5,1,5987.6424418604  
5,1,7009.2882653062  
5,1,6802.0555555556  
5,1,13237.875  
5,1,9240.8750000001  
5,1,18556.1960227274  
5,1,5792.2972972973  
5,1,6461.6250000002  
5,1,6346.4068627451  
5,1,9619  
5,1,10424.4999999998  
5,1,6712.84375  
5,1,5702.25  
5,1,10276.677631579  
5,1,6269.2579787233  
5,1,5216.5304347825  
5,1,17394.56875  
5,1,15005.03125  
5,1,5206  
5,1,9881.2000000001  
5,1,7034.6542553192  
5,1,7773.328125  
5,1,5035.75  
5,1,5195.8000000001  
5,1,6054.2562499999  
5,1,9306.8097826085  
5,1,7821.345

5,1,8367.8449999999  
5,1,7892.9318181818  
5,1,17535.8809523811  
5,1,5340.6875  
5,1,7153.5135869565  
5,1,6252.0000000001  
5,1,6987.1607142856  
5,1,11756.4081632653  
5,1,11743.2765151513  
5,1,6566.4107142857  
5,1,5323.7111111112  
5,1,10669.930327869  
5,1,5421.0304878049  
5,1,5230.1097560976  
5,1,15641.5384615386  
5,1,9453.8695652174  
5,1,7581.9739583332  
5,1,10668.3374999998  
5,1,16995.9044117647  
5,1,19764.0723684211  
5,1,10827.0348837211  
5,1,5137.1222222222  
5,1,14734.1567796606  
5,1,10424.1377551021  
5,1,5343.875  
5,1,15507.0426829269  
5,1,16790.6357758623  
5,1,14943.4802631577  
5,1,6526.5106382977  
5,1,5210.2295918366  
5,1,10606.947368421  
5,1,7721.506097561  
5,1,5948.3839285714  
5,1,19679.8399999999  
5,1,19244.0737179486  
5,1,11255.7616279072  
5,1,7702.4941860466  
5,1,6067.8070175439  
5,1,18055.3285714286  
5,1,6470.1020408163  
5,1,8380.1274509804  
5,1,10195.25  
5,1,12076.2282608695  
5,1,7173.7553191488  
5,1,10140.3790322583  
5,1,8196.4476744186  
5,1,5052.8547297297  
5,1,5196.4711538461  
5,1,17984.9891304349  
5,1,7456.4134615384  
5,1,5197.1777777777  
5,1,13669.3696808511  
5,1,6143.5192307692  
5,1,8316.6511627906  
5,1,12682.0880681817  
5,1,7417.1108490565  
5,1,10595.4575  
5,1,5078.2058823529  
5,1,6102.7111111112  
5,1,12451.5  
5,1,7955.1630434785  
5,1,17086.7719780218  
5,1,5262.0803571428  
5,1,10005.3414634146  
5,1,9058.3333333331  
5,1,6905.0188679244

5,1,7624.9499999998  
5,1,5165.2500000001  
5,1,8887.5967741936  
5,1,18340.9817073169  
5,1,6555.2239583332  
5,1,6881.0759803922  
5,1,11511.3783783785  
5,1,5368.2291666668  
5,1,15144.4692982453  
5,1,5530.4767441861  
5,1,6084.2173913045  
5,1,6163.3693181818  
5,1,8882.1078431372  
5,1,7112.6931818182  
5,1,9954.9999999998  
5,1,7735.5833333332  
5,1,5362.987745098  
5,1,5619.3841463416  
5,1,5726.1217105262  
6,2,9009.3939393939  
6,2,6032.7727272728  
6,2,8069.5425531914  
6,2,6000.4901960785  
6,2,8434.1944444446  
6,2,5093.5788043479  
6,2,5180.2647058824  
6,2,5009.9325  
6,2,7914.625  
6,2,6798.0457317073  
6,2,5693.2244318181  
6,2,5101.4749999999  
6,2,7781.2500000002  
6,2,6663.6607142858  
6,2,8090.6562500002  
6,2,5499.3520408164  
6,2,7643.5255681817  
6,2,5443.5051020408  
6,2,5630.5512820513  
6,2,5455.9196428569  
6,2,5225.3451086956  
6,2,6311.6413043478  
6,2,10195.2840909092  
6,2,6460.2819148937  
6,2,5637.8795454546  
6,2,7820.4761904761  
6,2,5247.1397058824  
6,2,5841.3935185185  
6,2,8351.8260869565  
6,2,5497.9157608697  
6,2,10700.0222222224  
6,2,7596.9347826087  
6,2,6068.8333333332  
6,2,6346.7435897436  
6,2,5382.5  
6,2,7787.015625  
6,2,10823.9148936169  
6,2,6292.1447368421  
6,2,7081.6013513513  
6,2,6498.268292683  
6,2,5352.429245283  
6,2,5154.75  
6,2,7553.8191489362  
6,2,5583.6107954546  
6,2,10789.1441717791  
6,2,5878.7180851065  
6,2,7321.0352564103

6,2,7745.0102040818  
6,2,5184.1219512197  
6,2,6520.1940789474  
6,2,5591.4893617022  
6,2,5085.861111111  
6,2,9763.9414893617  
6,2,8152  
6,2,8353.9285714286  
6,2,8234.5555555557  
6,2,8217.0853658538  
6,2,12561.3953488371  
6,2,11841.3750000001  
6,2,5391.168478261  
6,2,5917.8486842105  
6,2,5209.8016304348  
6,2,5032.8461538461  
6,2,10463.3848039221  
6,2,5755.2146226415  
6,2,5534.0851063829  
6,2,5858.3643617022  
6,2,5527.2142857143  
6,2,8033.8359375  
6,2,5924.1136363638  
6,2,5447.3999999999  
6,2,7094.28  
6,2,5845.875  
6,2,9048.5178571428  
6,2,6581.3125  
6,2,5633.2670454546  
6,2,9380.1785714286  
6,2,8372.2119565217  
6,2,6882.1812500001  
6,2,8244.5789473684  
6,2,7417.6991869918  
6,2,8132.2717391305  
6,2,6198.1622340425  
6,2,5104.930232558  
6,2,5268.7980769231  
6,2,5140.8575581394  
6,2,7072.465  
6,2,6627.9702380953  
6,2,7827.9277777777  
6,2,7164.7435897436  
6,2,5325.1312499999  
6,2,5440.53125  
6,2,9011.0863636363  
6,2,5833.5  
6,2,6170.472972973  
6,2,6436.4158163264  
6,2,6472.375  
6,2,5019.7653061225  
6,2,5548.9545454544  
6,2,5443.3552631579  
6,2,5366.7749999999  
6,2,9643.9960317459  
6,2,7296.703125  
6,2,5508.1078431373  
6,2,6362.96  
6,2,9422.3749999999  
6,2,7227.0611702128  
6,2,6231.6361111109  
6,2,5062.8039215686  
6,2,6998.4177631579  
6,2,8026.8365384616  
6,2,5913.5  
6,2,5685

6,2,5905.9199999999  
6,2,8353.7743902439  
6,2,9202.5552325581  
6,2,5003.5216346154  
6,2,6426.7890625001  
6,2,7234.6947674419  
6,2,9576.7663043479  
6,2,8645.0526315789  
6,2,5707.5416666667  
6,2,9397.6590909091  
6,2,7011.3368055556  
6,2,6330.2329545454  
6,2,7361.1000000001  
6,2,5229.90625  
6,2,7895.804054054  
7,1,5228.4851190477  
7,1,6915.7256097561  
7,1,6765.6829268293  
7,1,10081.41875  
7,1,13534.3821989529  
7,1,5241.6258503402  
7,1,9308.4360465115  
7,1,5180.1219512196  
7,1,5313.7926829269  
7,1,12815.2222222221  
7,1,6598.0285714287  
7,1,10301.1447368419  
7,1,6133.0612244898  
7,1,15581.5199999999  
7,1,10751.0427631579  
7,1,8789.2660098521  
7,1,14979.6702127659  
7,1,6672.48125  
7,1,5678.0238095238  
7,1,6250.1647727273  
7,1,7612.7750000002  
7,1,5439.40625  
7,1,5515.8716216216  
7,1,7907.804054054  
7,1,5007.3  
7,1,7833.7173913043  
7,1,9698.4999999999  
7,1,13208.0611111114  
7,1,9792.59375  
7,1,12944.2094594595  
7,1,6900.4871794871  
7,1,12248.25  
7,1,7094.4763513513  
7,1,9435.5349999999  
7,1,6887.2139423077  
7,1,6480.4705882354  
7,1,11800.1333333333  
7,1,7435.0249999999  
7,1,11000.255952381  
7,1,15778.5624999999  
7,1,5211  
7,1,7093.1595744679  
7,1,5296.7194444444  
7,1,7588.9605263158  
7,1,8813  
7,1,5854.8571428571  
7,1,8152.0000000001  
7,1,12716.3522727272  
7,1,7812.4425675675  
7,1,10679.4488636363  
7,1,7628.3225806452

7,1,5700.9636363635  
7,1,6391.8333333333  
7,1,8235.9086538462  
7,1,5424.5593750001  
7,1,8867.4750000001  
7,1,5746.46875  
7,1,5319.4740566038  
7,1,5091.2421875  
7,1,5718.3263157896  
7,1,5718.2348484849  
7,1,7306.4512195122  
7,1,5174.9414893618  
7,1,18480.0769230768  
7,1,7936.642857143  
7,1,7270.2286585366  
7,1,6109.8671875  
7,1,5850.1548913044  
7,1,5213.0729166666  
7,1,11878.4255319147  
7,1,5956.9840425531  
7,1,13610.3846153845  
7,1,6531.5808823527  
7,1,5260.2543859649  
7,1,6207.0833333332  
7,1,9029.8039215686  
7,1,7248.5984848484  
7,1,6846.9107142858  
7,1,5851.5  
7,1,9884.8922413793  
7,1,6458.8083333334  
7,1,6621.1851851851  
7,1,13382.5729166671  
7,1,12292.9148936169  
7,1,5189.6041666666  
7,1,12782.1081081081  
7,1,7457.8575581397  
7,1,5159.4925  
7,1,18409.9925373137  
7,1,5890  
7,1,12919.8085106383  
7,1,6034.2619047619  
7,1,7857.2224576271  
7,1,5211.4999999999  
7,1,9372.5000000002  
7,1,6309.0465116279  
7,1,6774.5862068965  
7,1,16772.7200000001  
7,1,9119.1481481483  
7,1,8177.7833333333  
7,1,5851.84375  
7,1,5543.2833333333  
7,1,6094.1328125  
7,1,6413.4166666666  
7,1,5743.6036585366  
7,1,19520.5698324018  
7,1,5080.205357143  
7,1,8861.6666666667  
7,1,7994.8600000001  
7,1,6097.5670731707  
7,1,7539.2250000001  
7,1,18615.1470588235  
7,1,9360.1331967214  
7,1,7176.5361842104  
7,1,14692.9005681818  
7,1,12067.2347560976  
7,1,13263.2350746273

7,1,6876.9673913044  
7,1,5037.78125  
7,1,6495.0869565218  
7,1,15396.1117021273  
7,1,15927.71875  
7,1,5578.6036585366  
7,1,7034.234375  
7,1,6682.9807692309  
7,1,7031.875  
7,1,11083.9107142859  
7,1,5280.3333333336  
7,1,5154.684659091  
7,1,5064.1203703704  
7,1,10426.1583333336  
7,1,11375  
7,1,5947.1027777778  
7,1,5180.6916666666  
7,1,9637.9464285712  
7,1,8418.8837209304  
7,1,18024.0000000001  
7,1,10211.5613207545  
7,1,10757.7419354837  
7,1,5124.1176470587  
7,1,14739.5841836733  
7,1,9823.773255814  
7,1,8003.8378378378  
7,1,8658.5357142857  
7,1,5230.1580882353  
7,1,9399.5212765957  
7,1,8915.3662790696  
7,1,6641.09  
7,1,6744.5511363636  
7,1,5260.95  
7,1,6532.3990147783  
7,1,7090.0000000001  
7,1,7316  
7,1,5833.6825  
7,1,8082.2321428572  
7,1,5460.1029411766  
7,1,5475.4361702129  
7,1,8638.5760869565  
7,1,15351.2564102563  
7,1,9022.0937500001  
7,1,6432.8190789472  
7,1,12268.5914634146  
7,1,7134.9348958331  
7,1,7088.3557692309  
7,1,6640.2931034482  
7,1,5215.396226415  
7,1,18336.4354838711  
7,1,6914.7021276596  
7,1,10250.6542553192  
7,1,17657.9083333334  
7,1,13497.9210526314  
7,1,9613.0409090911  
7,1,7289.8048780487  
7,1,9941.3414634146  
7,1,11064.3680555555  
7,1,8951.5409090909  
7,1,7961.5462962962  
7,1,9328.5732758622  
7,1,7241.4944852942  
7,1,6346.8706896553  
7,1,5244.3679245284  
7,1,15034.7959183671  
7,1,5246.875

7,1,5158.6545454546  
7,1,7415.1328125  
7,1,5308.84  
7,1,5448.4555555555  
7,1,5962.5297029702  
7,1,15214.1637931036  
7,1,5553.2838983051  
7,1,9900.5813953489  
7,1,5782.3500000001  
7,1,10848.6648936169  
7,1,7378.1482558139  
7,1,13914.9782608699  
7,1,5532.0999999999  
7,1,12455.857142857  
7,1,14231.3214285712  
7,1,6801.5353260869  
7,1,7825.8430851065  
7,1,8086.2872340426  
7,1,5735.3031914893  
7,1,5631.9791666667  
7,1,7325.7333333332  
7,1,5183.6875  
7,1,8348.9799999999  
7,1,10246.0187969925  
7,1,6120.6420454545  
7,1,10331.3203125  
7,1,8813.4413793104  
7,1,18062.1764705881  
7,1,5394.1666666665  
7,1,18500.0833333333  
7,1,5255.325  
7,1,5273.7154255319  
7,1,5903.8536585367  
7,1,6174.2916666667  
7,1,8248.8653846153  
7,1,5211.0597826088  
7,1,5753.7784090909  
7,1,19801.9375  
7,1,5726.55078125  
7,1,6168.1994047618  
7,1,7749.6328125  
7,1,6829.0816326532  
7,1,5115.2222222222  
7,1,9126.0398936171  
7,1,5211.2073170732  
7,1,7303.8128342246  
7,1,5726.1198979591  
7,1,7270  
7,1,6494.4754098363  
7,1,7941.4692982456  
7,1,11703.6337209303  
7,1,16772.75  
7,1,11467.0574324323  
7,1,15545.5833333335  
7,1,6181.7250000001  
7,1,5463.875  
7,1,5109.9880952381  
7,1,5185.2236842105  
7,1,16247.1088709677  
7,1,11832.2500000002  
7,1,9329.0093749999  
7,1,7407.9908536585  
7,1,6187.2874999999  
7,1,5055.0000000001  
7,1,9889  
7,1,15654.2727272728

7,1,13093.6968749999  
7,1,6475  
8,2,7177.075  
8,2,7146.4625  
8,2,8066.650862069  
8,2,5397.9999999999  
8,2,11038.7205882354  
8,2,5258.152173913  
8,2,7575.1874999999  
8,2,9170.0047169813  
8,2,7800.6710526316  
8,2,9008.2702702703  
8,2,5765.4883720932  
8,2,6935.0131578948  
8,2,7684.3384146339  
8,2,7604.4166666666  
8,2,6938.9797297298  
8,2,7233.1442307692  
8,2,5148.3475  
8,2,7003.6979166668  
8,2,6891.0714285715  
8,2,5477.3804347825  
8,2,5975.7403846154  
8,2,6395.6923076923  
8,2,7865.7777777777  
8,2,5446.1517857143  
8,2,5861.0408163266  
8,2,5166.125  
8,2,6325.6341463415  
8,2,8939.6335227272  
8,2,5524.1886792454  
8,2,5898  
8,2,9169.4473684211  
8,2,8582.2368421053  
8,2,6465.5000000001  
8,2,5152.342105263  
8,2,5657.7734375  
8,2,5302.6428571428  
8,2,5508.9111111113  
8,2,6303.4555555554  
8,2,10976.7279411766  
8,2,5376.4375  
8,2,5975.3125  
8,2,5941.47265625  
8,2,9862.4222222222  
8,2,9449.0689655172  
8,2,7327.4627659576  
8,2,5155.28125  
8,2,5928.1416666667  
8,2,11488.3124999996  
8,2,7822.6570512821  
8,2,5809.4375  
8,2,6537.5387931033  
8,2,11008.1973684212  
8,2,6614.2857142857  
8,2,7721.6249999998  
8,2,5039.8421052631  
8,2,6007.7573529412  
8,2,8598.4929245286  
8,2,5079.1825396825  
8,2,8315.4821428572  
8,2,6521.3529411764  
8,2,5400.9389534884  
8,2,10105.6083333336  
8,2,8462.5777027028  
8,2,8738.2512315272

8,2,7336.6296296296  
8,2,7129.5731707316  
8,2,5609.8529411766  
8,2,5350.2390350878  
8,2,8011.6306818181  
8,2,7313.5058139534  
8,2,5213.0178571429  
8,2,6479.2845744682  
8,2,6287.4722222222  
8,2,6182.4583333334  
8,2,7126.8092105264  
8,2,7837.0773809523  
8,2,5327.5714285713  
8,2,7214.2276785714  
8,2,10423.8928571428  
8,2,6584.1447368419  
8,2,7684.4375  
8,2,5258.3333333335  
8,2,9517.3229166669  
8,2,9935.46875  
8,2,8710.9787234041  
8,2,9303.7499999998  
8,2,9859.6749999999  
8,2,9645.9885714288  
8,2,5233.2  
8,2,10332.0661764708  
8,2,5037.2038043478  
8,2,5835.0923913042  
8,2,5131.2340425532  
8,2,8627.0142857142  
8,2,9609.3181818181  
8,2,5317.2886904762  
8,2,6389.2093023255  
8,2,6653.6170212766  
8,2,5381.1333333335  
8,2,5796.5600000001  
8,2,8744.9285714286  
8,2,5001.65625  
8,2,5450.1071428572  
8,2,5720.7039473685  
8,2,6196.1590909093  
8,2,9120.9388888889  
8,2,5443.5656250001  
8,2,6920.4843749999  
8,2,5063.8936170212  
8,2,8128.1097560977  
8,2,12454.1249999998  
3,1,5186.9349999999  
9,1,5873.5706521741  
9,1,13653.0000000002  
9,1,7278.3921568626  
9,1,5349.6564417177  
9,1,7638.7398373984  
9,1,5452.1127450981  
9,1,9626.8534482759  
9,1,5422.8095238095  
9,1,8440.0769230769  
9,1,5780.5288461539  
9,1,6365  
9,1,16416.55  
9,1,9557.2056451613  
9,1,12851.4000000001  
9,1,9210.3406862744  
9,1,11001.8111111111  
9,1,6660.3937499999  
9,1,7690.6280487806

9,1,14780.3194444447  
9,1,9212.1796875  
9,1,8214.1301020408  
9,1,5671.552631579  
9,1,5301.5663265306  
9,1,7436.8173076924  
9,1,11993.4146341463  
9,1,5585.7824074074  
9,1,6453.2299107141  
9,1,8093.7824074074  
9,1,5368.2592592593  
9,1,7267.4119318181  
9,1,10895.6041666668  
9,1,8636.9107142856  
9,1,6359.2777777777  
9,1,7651.7812500002  
9,1,5654.8081395349  
9,1,5149.8837209302  
9,1,6739.4107142857  
9,1,8288.9622641507  
9,1,5016.6219512195  
9,1,7179.3535714286  
9,1,7601.0755813956  
9,1,5073.7407407407  
9,1,6330.1666666668  
9,1,8759.1875  
9,1,8451.5948275861  
9,1,8142.5294117648  
9,1,12554.078125  
9,1,6081.6343750001  
9,1,13968.5505952381  
9,1,5777.5714285717  
9,1,7232.2905405405  
9,1,16399.42  
9,1,17450.4594594595  
9,1,19575.6611842104  
9,1,5108  
9,1,16980.295138889  
9,1,10000.457236842  
9,1,5865.725  
9,1,11064.296875  
9,1,5108.8444444444  
9,1,5198.7692307693  
9,1,7177.5493421052  
9,1,7600.8478260869  
9,1,9394.1636904762  
9,1,6880.4825581395  
9,1,6827.8928571428  
9,1,7478.441860465  
9,1,6418.9540816326  
9,1,7244.7297297297  
9,1,7745.0738636363  
9,1,6924.4725609757  
9,1,5895.6875  
9,1,6398.7034883722  
9,1,5330.703125  
9,1,8622.8382352938  
9,1,7023.1187499998  
9,1,12336.6052631579  
9,1,7967.8088235294  
9,1,7018.5599999998  
9,1,18351.3730769228  
9,1,13827.4681372551  
9,1,6109.672413793  
9,1,6642.3414634146  
9,1,11867.6750000002

9,1,7211.4509803922  
9,1,13994.2678571429  
9,1,6424.7908163267  
9,1,11091.2999999999  
9,1,8709.4447674418  
9,1,6093.8666666666  
9,1,7094.9743589743  
9,1,7112.1818181818  
9,1,8233.7608695653  
9,1,6572.462264151  
9,1,12308.1840277777  
9,1,5609.4854651163  
9,1,8545.1818181819  
9,1,11572.216216216  
9,1,5966.3170731707  
9,1,5495.4693877551  
9,1,6799.5159574467  
9,1,6816.7647058824  
9,1,13547.116883117  
9,1,14351.4756097564  
9,1,6307.3307291667  
9,1,14187.6249999999  
9,1,5193.9508196721  
9,1,7516.859375  
9,1,7839.9107142858  
9,1,11884.9527027027  
9,1,7508.3181818183  
9,1,5266.3806818181  
9,1,6143.0084745763  
9,1,5059.2433035714  
9,1,5735.0125  
9,1,6736.4479166666  
9,1,5958.6000000001  
9,1,11014.3846153843  
9,1,5582.3179824561  
9,1,8040.6499999999  
9,1,6080.2261904762  
9,1,8068.6818181819  
9,1,5743.2831632654  
9,1,6610  
9,1,8477.7974999999  
9,1,6367.0056818181  
9,1,5609.5833333333  
9,1,6722.0307017544  
9,1,15423.4687499998  
9,1,6656.9772727275  
9,1,7433.1428571427  
9,1,9986.7954545455  
9,1,6674.8828125  
9,1,7299.9407894737  
9,1,14862.9671052632  
9,1,5744.2291666667  
9,1,5536.4767441859  
9,1,6388.090116279  
9,1,5028.3841463414  
9,1,8052.5749999999  
9,1,9861.875  
9,1,10996.5482456138  
9,1,6658.3409090909  
9,1,10190.2412790695  
9,1,5807.3541666666  
9,1,16342.0520833336  
9,1,9224.6413043478  
9,1,8584.5454545453  
9,1,6826.1063829787  
9,1,5434.9972826088

9,1,13344.5336538458  
9,1,7939.8628048781  
9,1,14834.5797872341  
9,1,8593.7678571429  
9,1,6905.125  
9,1,8460.2377049181  
9,1,5505.8048780488  
9,1,10654.1944444446  
9,1,5701.5000000002  
9,1,7330.7828947366  
9,1,5078.5047169812  
9,1,10712.8065476194  
9,1,9470.1875  
9,1,13997.1319444443  
9,1,9026.9933035715  
9,1,6249.6785714285  
9,1,7803.7672413794  
9,1,10080.7526595746  
9,1,9144.7272727274  
9,1,11319.552631579  
9,1,5483.0833333332  
9,1,13761.1634615385  
9,1,14807.9756097561  
9,1,14986.7065217392  
9,1,6978.7388888887  
9,1,8784.4999999999  
9,1,7285.4391891892  
9,1,8439.125  
9,1,6017.38  
9,1,5337.4210526316  
9,1,14294.2321428567  
9,1,6506.447368421  
9,1,8375.6281249999  
9,1,7805.5815217392  
9,1,8529.1029411765  
9,1,6607.9360465117  
9,1,7383.3349056604  
9,1,7748.5957446807  
9,1,5512.3546511628  
9,1,6719.8139534883  
9,1,5167.8600000001  
9,1,10279.7933673469  
9,1,5818.5664893616  
9,1,12592.597826087  
9,1,5229.6534090909  
9,1,15465.8374999999  
9,1,5635.05  
9,1,5119.2138157894  
9,1,17218.3295454541  
9,1,8649.6297169813  
9,1,6249.1363636364  
9,1,5801.923076923  
9,1,15706.456521739  
9,1,5745.6646341464  
9,1,14697.1196808509  
9,1,11551.5029069767  
9,1,5481.9017857144  
9,1,5718.5  
9,1,7080.2750000001  
9,1,5398.4701086957  
9,1,7379.2282608695  
9,1,6309.1730769229  
9,1,11911.5055555554  
9,1,5744.7391304348  
9,1,10329.4375  
9,1,6429.6293103447

9,1,5807  
9,1,5418.5877659574  
9,1,16430.5661764705  
9,1,5010.7142857142  
9,1,17471.8546511627  
9,1,5918.328125  
9,1,5828.8555555556  
9,1,10466.026442308  
9,1,10367.1473214283  
9,1,5192.5102040816  
9,1,6023.2790697674  
10,2,6994.9204545455  
10,2,8273.9642857142  
10,2,5229.058510638  
10,2,7103.0625  
10,2,6673.8688524592  
10,2,11396.96484375  
10,2,5998.0433673469  
10,2,9022.9000000003  
10,2,8408.7325581391  
10,2,8248.0847457625  
10,2,8185.0190217392  
10,2,7613.8142857141  
10,2,8293.3513513513  
10,2,5421.4888888889  
10,2,9068.4591836735  
10,2,13321.4583333335  
10,2,6975.9655172414  
10,2,5134.3010204081  
10,2,5342.0717592594  
10,2,5207.3068181818  
10,2,7053.1889534883  
10,2,5457.7708333332  
10,2,5163.5928143713  
10,2,8151.2432432432  
10,2,5562.6363636364  
10,2,8565.3506097562  
10,2,6955.9036458335  
10,2,7273.3043478262  
10,2,7664.4047619048  
10,2,6966.1918604649  
10,2,6889.7621951219  
10,2,5574.206632653  
10,2,6469.4609375  
10,2,5143.554347826  
10,2,6824.9487179487  
10,2,11028.5374999999  
10,2,5397.8260869566  
10,2,5523.1162790698  
10,2,5154.9999999999  
10,2,5893.2410714286  
10,2,8686.3103448276  
10,2,9117.6326530614  
10,2,5980.9734042553  
10,2,9460.1153846153  
10,2,6611.3227848101  
10,2,7105.96875  
10,2,6859.8333333332  
10,2,7082.8090452262  
10,2,13108.0583333334  
10,2,7942.5846774196  
10,2,5986.8392857143  
10,2,5780.948275862  
10,2,5267.5581395348  
10,2,5691.1614583332  
10,2,7853.7906976744

10,2,8826.640350877  
10,2,5054.9846938776  
10,2,5500.305  
10,2,5032.8717105262  
10,2,6504.5500000001  
10,2,6799.3181818182  
10,2,6873.0833333334  
10,2,6672.2042682924  
10,2,5254.5  
10,2,5103.7837837839  
10,2,5462.4507575759  
10,2,9187.3804347826  
10,2,8756.3265306122  
10,2,9415.0353260871  
10,2,5392.8928571429  
10,2,6319.625  
10,2,5800.153409091  
10,2,5586.5285714286  
10,2,6170.9138888889  
10,2,7604.0000000002  
10,2,9324.5555555557  
10,2,8138.0288461538  
10,2,11276.4634146341  
10,2,9933.8125  
10,2,6880  
10,2,5282.1538461538  
10,2,7941.85  
10,2,6763.0058139534  
10,2,6379.1108870966  
10,2,6519.4680851066  
10,2,5933.2666666666  
10,2,9382.0625  
10,2,6185.6820175438  
10,2,5096.7926136364  
10,2,6663  
10,2,6790.0675675676  
10,2,7128.5163043478  
10,2,5323.265625  
10,2,6389.237244898  
10,2,10255.6010638297  
10,2,5380.7933673469  
10,2,5399.8101851851  
10,2,8391.1333333333  
10,2,6877.6634615386  
10,2,6513.1198979592  
10,2,8050.8902439026  
10,2,9491.9519230769  
10,2,8791.0531914892  
10,2,5409.9389534884  
10,2,6119.7927631579  
10,2,5978.7620192307  
10,2,5768.5170454546  
10,2,7849  
10,2,5921.59375  
10,2,6303.75  
10,2,5080.1851851852  
10,2,6842.3682432434  
11,1,7507.0957446809  
11,1,7074.0454545453  
11,1,6057.94  
11,1,11916.6118421052  
11,1,5428.5483870967  
11,1,5270.5833333333  
11,1,6187.1775000001  
11,1,7129.6530612246  
11,1,17975.2000000001

11,1,7083  
11,1,6804.9583333332  
11,1,6830.7994186046  
11,1,5395.6610576923  
11,1,6080.8571428571  
11,1,5535.6078431373  
11,1,19659.1745689657  
11,1,9386.6757990869  
11,1,9679.9816513762  
11,1,9132.0094339622  
11,1,6883.25  
11,1,8074.0153846152  
11,1,7122.6420454546  
11,1,10249.8888888891  
11,1,5884.8000000001  
11,1,7109.5259433963  
11,1,7718.7946428572  
11,1,7396.4817708335  
11,1,7860.8695652174  
11,1,15300.0599999998  
11,1,5818.4755434783  
11,1,9967.5641891892  
11,1,5548.2329545454  
11,1,5341.5326086956  
11,1,5534.9557291667  
11,1,18732.5692307687  
11,1,5724.6744186046  
11,1,8689.9655172414  
11,1,6866.1985294118  
11,1,8159.7391304348  
11,1,7772.1500000001  
11,1,8498.7543859649  
11,1,6625.8  
11,1,11251.6556603773  
11,1,5020.6586538461  
11,1,8038.6250000001  
11,1,13064.1706730765  
11,1,6245.2788461538  
11,1,6792.8952702702  
11,1,13723.8333333333  
11,1,6600.2102272727  
11,1,12647.9999999999  
11,1,16996.4444444442  
11,1,13473.9107142857  
11,1,5993.4975  
11,1,15678.0588235295  
11,1,8825.2458100557  
11,1,6220.9999999999  
11,1,7642.6419491525  
11,1,6699.8617021277  
11,1,5067.6956521738  
11,1,5314.0526315791  
11,1,10551.0285714285  
11,1,15942.6250000002  
11,1,8786.4130434784  
11,1,6400.5875000001  
11,1,5020.721875  
11,1,8911.2942708333  
11,1,10240.0196078432  
11,1,9043.2558139534  
11,1,5653.1431818182  
11,1,17319.7075471701  
11,1,8074.4042553191  
11,1,8104.7202380951  
11,1,7745.7361111111  
11,1,6013.1875000001

11,1,6078.5888888888  
11,1,18745.6282051281  
11,1,16382.7714285715  
11,1,9067.8292682925  
11,1,8713.4418604652  
11,1,7125.9864864864  
11,1,5212.1698113208  
11,1,6011.21875  
11,1,8206.5319148934  
11,1,6776.1755319148  
11,1,7933.3349056604  
11,1,10996.3571428574  
11,1,9964.6153846153  
11,1,16168.2903225806  
11,1,7532.4888888888  
11,1,15709.1412037039  
11,1,12170.7410714285  
11,1,12504.6179245282  
11,1,6373.25  
11,1,6930.2200000001  
11,1,5239.9517045455  
11,1,12208.9912790699  
11,1,7249.4076086955  
11,1,7229.8587962965  
11,1,6915.2727272727  
11,1,5776.256097561  
11,1,9888.446969697  
11,1,8595.4396551725  
11,1,13169.8168103447  
11,1,11539.46875  
11,1,5623.9888888889  
11,1,6391.7723214284  
11,1,6803.8375  
11,1,5385.3854166666  
11,1,5077.1005434782  
11,1,8471.3505434784  
11,1,5051.6755319149  
11,1,19421.923076923  
11,1,6318.1630434784  
11,1,7632.3  
11,1,5996.8387096775  
11,1,6340.0640243903  
11,1,5768.7201086957  
11,1,12932.6406249998  
11,1,5897.5326086957  
11,1,9504.4479166669  
11,1,6914.3474999998  
11,1,13448.8273809523  
11,1,5812.55  
11,1,5032.0306122449  
11,1,5450.4517045455  
11,1,12592.375  
11,1,5438.2211538463  
11,1,6714.9186046512  
11,1,14154.3428571428  
11,1,6879.585  
11,1,15174.1999999995  
11,1,10711.5499999999  
11,1,8157.2999999998  
11,1,5033.3985849057  
11,1,10538.4062499999  
11,1,8382.6783919599  
11,1,6218.9763779528  
11,1,5260.4294871794  
11,1,5776.0613207548  
11,1,6034.2280701756

11,1,9356.9565217394  
11,1,5688.3835227273  
11,1,5518.5700483091  
11,1,6162.8333333334  
11,1,5085.3113207547  
11,1,5236.3833333334  
11,1,6248.1323529411  
11,1,5546.1249999999  
11,1,6418.4468085107  
11,1,9434.6177884615  
11,1,7664.9694444445  
11,1,13964.8235294118  
11,1,8090.5652173913  
11,1,5733.7244897959  
11,1,5241.1047297297  
11,1,5345.2440476189  
11,1,6603.2173913044  
11,1,6474.7823275861  
11,1,14251.1976744184  
11,1,6086.5436046511  
11,1,5206.238095238  
11,1,16823.294117647  
11,1,9692.5573770491  
11,1,5623.7453703702  
11,1,5908.0400000001  
11,1,8784.640625  
11,1,11125.4583333331  
11,1,6566.8389830509  
11,1,12643.4897959185  
11,1,6203.141304348  
11,1,7086.2857142857  
11,1,7958.5227272726  
11,1,8295.3430232557  
11,1,7207.3999999999  
11,1,12254.9796511626  
11,1,8642.3283898305  
11,1,5399.25  
11,1,7884.0263157895  
11,1,16762.6341463416  
11,1,13652.4811320759  
11,1,6779.1937499999  
11,1,7340.100490196  
11,1,9011.3000000001  
11,1,6702.20625  
11,1,5032.1304347826  
11,1,17118.8895348837  
11,1,5059.7444444444  
11,1,13424.53125  
11,1,5636.0000000001  
11,1,8577.5043103448  
11,1,17045.7325581395  
11,1,11264.6323529411  
11,1,17615.6985294116  
11,1,6986.641509434  
11,1,6484.7499999999  
11,1,18909.0581395349  
11,1,5852.7916666666  
11,1,14354.5000000001  
11,1,18879.2374999994  
11,1,5162.1363636362  
11,1,7228.5367647059  
11,1,10794.6312499998  
11,1,9114.0994897962  
11,1,18888.8846153847  
11,1,8403.5851063829  
11,1,6885.9407894736

11,1,5211.1793478261  
11,1,7652.2105263158  
11,1,5453.7777777779  
11,1,5508.945652174  
11,1,12532.3977272726  
11,1,11391.260869565  
11,1,12048.4411764707  
11,1,5568.9272727273  
11,1,7816.4147727272  
11,1,18985.507653061  
11,1,7291.8333333332  
11,1,19419.4249999999  
11,1,8826.03125  
11,1,15549.6450000001  
11,1,6594.0833333332  
11,1,5341.9760638297  
11,1,11455.451923077  
11,1,9262.1444444443  
11,1,9684.9147727275  
11,1,6947.2916666665  
11,1,7249.9454545455  
11,1,10453.0404411763  
11,1,6732.7826086957  
11,1,6051  
11,1,5667.2098214286  
11,1,6625.6027397261  
11,1,16134.6428571428  
11,1,7071.7441860465  
11,1,14236.6640625  
11,1,6326.9513888887  
11,1,7257.7115384616  
11,1,12840.7405660379  
11,1,9237.6249999999  
11,1,10318.1587837837  
11,1,7567.9393939393  
11,1,6682.9007352941  
11,1,6528.7004716982  
11,1,6048.0119047618  
11,1,16784.7499999998  
11,1,8199.6296296296  
11,1,7421.4333333334  
11,1,9050  
11,1,14852.7948717948  
11,1,6114.175  
11,1,17726.9895833333  
11,1,14130.203125  
11,1,5210.6219512195  
11,1,5368.125  
12,2,6001.3513513513  
12,2,6069.8750000001  
12,2,9956.5  
12,2,6076.1947674418  
12,2,5024.1764705883  
12,2,5184.1875  
12,2,8226.3519736844  
12,2,12416.890625  
12,2,6054.7619047619  
12,2,7271.0822368422  
12,2,9284.5657894738  
12,2,10480.4386792455  
12,2,6318.2134146342  
12,2,5645.2265625001  
12,2,6527.815  
12,2,5034.3583333333  
12,2,7505.68359375  
12,2,5720.474137931

12,2,7318.8611111111  
12,2,5305.3505154639  
12,2,8630.9976851852  
12,2,7508.1874999999  
12,2,5834.6388888888  
12,2,11005.7596153846  
12,2,7371.6875  
12,2,6008.9333333332  
12,2,6625.095744681  
12,2,5511.3525000001  
12,2,7284.3885869566  
12,2,6055.6118421052  
12,2,5223.6590909091  
12,2,7142.1642156862  
12,2,6252.9642857143  
12,2,5135.3951612903  
12,2,5030.1071428571  
12,2,5425.1572580645  
12,2,5765.0714285712  
12,2,5775.8090909091  
12,2,5964.525510204  
12,2,6360.3684210526  
12,2,5075.2352941177  
12,2,5646.0026041666  
12,2,7802.715116279  
12,2,8850.8962264152  
12,2,5455.625  
12,2,6211.2420212765  
12,2,7974.7861111111  
12,2,5710.4431818181  
12,2,6611.5600961538  
12,2,6616.4607142858  
12,2,5812.8048780487  
12,2,7111.7638888889  
12,2,7815.2558139533  
12,2,11841.0625  
12,2,7815.265957447  
12,2,5313.7794117648  
12,2,5112.8888888889  
12,2,6510.238372093  
12,2,7267.9444444443  
12,2,8522.8363636365  
12,2,5657.5570175438  
12,2,11405.6057692308  
12,2,7085.58  
12,2,5649.641509434  
12,2,10900.8500000001  
12,2,8016.1097560975  
12,2,5690.1761363637  
12,2,6955.6169354837  
12,2,9591.3194444444  
12,2,8260.8837209302  
12,2,5903.0104166666  
12,2,6346.9038461539  
12,2,6993.6071428571  
12,2,6944.7155172415  
12,2,5876.6896551725  
12,2,6992.3000000001  
12,2,5706.0878378379  
12,2,5070.3333333334  
12,2,5747.6607142858  
12,2,5822.796875  
12,2,6482.7999999999  
12,2,11280.3551136363  
12,2,6602.4431818182  
12,2,9474.5931818183

12,2,7007.068548387  
12,2,5348.6249999999  
12,2,6687.1586538461  
12,2,5912.1086956521  
12,2,9497.8397435896  
12,2,5450.25  
12,2,9377.9130434783  
12,2,5465.5384615384  
12,2,6669.5489130434  
12,2,6871.6041666668  
12,2,11129.8014705883  
12,2,6339.3829787233  
12,2,5535.2473404255  
12,2,8073.5128205128  
12,2,8192.2440476191  
12,2,5255.6150000003  
12,2,9238.9127906978  
12,2,6212.625  
12,2,5219.2727272727  
12,2,7390.3776595746  
12,2,6281.0384615386  
12,2,11415.1250000001  
12,2,6343.2585227272  
12,2,7700.3722222223  
12,2,6500.6595744681  
12,2,5849.1310975611  
12,2,5274.3676470588  
12,2,9457.4342105264  
12,2,5657.4088983051  
12,2,7041.2162162163  
12,2,5060.4468085107  
12,2,5313.6637931034  
12,2,7286.765625  
12,2,5360.9583333334  
12,2,7859.6527777776  
12,2,5684.5489130435  
12,2,5995.1515151515  
12,2,9943.5491803276  
12,2,7486.6666666669  
12,2,5602.138888889  
12,2,5408.5288461538  
12,2,9684.5330188678  
12,2,7207.375  
12,2,5027.7352941175  
12,2,5478.1302083332  
12,2,5801.1217948717  
12,2,8526.8549999998  
12,2,6559.7625  
12,2,5354.6542553192  
12,2,7549.2756410257  
12,2,7261.7792553192  
12,2,5008.6212121212  
13,1,7096  
13,1,5999.3333333335  
13,1,5116.4627659575  
13,1,8170  
13,1,6976.1756756756  
13,1,5395.7840909091  
13,1,5374.6875000001  
13,1,5156.9204545454  
13,1,5926.7017543858  
13,1,9419.8777173915  
13,1,6350.2309782608  
13,1,9536.6904761906  
13,1,6433.9528301885  
13,1,8767.9448529414

13,1,16322.7355769231  
13,1,7887.4499999998  
13,1,11129.4583333332  
13,1,9961.9662162164  
13,1,6224.9812500001  
13,1,6157.8418367347  
13,1,6129.328488372  
13,1,16391.599264706  
13,1,14471.4136363633  
13,1,6078.5068181819  
13,1,10502.0625  
13,1,6442.4074074073  
13,1,6805.3035714286  
13,1,6757.3170731707  
13,1,7276.8374999998  
13,1,19648.1141304348  
13,1,5218.5178571429  
13,1,5414.5142857144  
13,1,5725.75  
13,1,6369.3909574468  
13,1,8832.5454545456  
13,1,5010.3546511628  
13,1,5212.3374999999  
13,1,5164.9411764706  
13,1,9157.5625  
13,1,7241.8293269231  
13,1,6524.4414893616  
13,1,16100.2000000004  
13,1,9146.8944444445  
13,1,6895.9593023255  
13,1,9109.9429347826  
13,1,5703.9464285714  
13,1,5756.2  
13,1,5920.4787234043  
13,1,5814.6493055557  
13,1,5850.4795918368  
13,1,7731.2666666665  
13,1,14001.2907608694  
13,1,5100.090909091  
13,1,9181.0795454545  
13,1,5514.6018518519  
13,1,5746.2394067797  
13,1,6433.8205128205  
13,1,6973.1538461538  
13,1,5707.90625  
13,1,7021.9121621621  
13,1,13899.352272727  
13,1,5785.2978723402  
13,1,5265.75  
13,1,6291.8777777778  
13,1,6671.4510869565  
13,1,6252.3451086956  
13,1,10085.2530864198  
13,1,5694.58984375  
13,1,10375.4390243906  
13,1,6409.9714285715  
13,1,5861.2916666668  
13,1,5890.7692307692  
13,1,7991.6547619048  
13,1,7632.3203125  
13,1,18222.1875  
13,1,5713.6773255814  
13,1,5510.6743421053  
13,1,16524.3469387758  
13,1,6634.2962962965  
13,1,15297.7500000001

13,1,13624.3032407409  
13,1,10001.75  
13,1,8214.247222221  
13,1,5659.731707317  
13,1,6478.1770833334  
13,1,5411.9672619046  
13,1,17968.8593750002  
13,1,9460.8780487806  
13,1,8734.9599056604  
13,1,8843.1590909092  
13,1,8074.0661764707  
13,1,9646.883064516  
13,1,13631.2543859652  
13,1,7673.2870370371  
13,1,7357.4027777779  
13,1,6342.68  
13,1,16033.5477707009  
13,1,5188.0135135136  
13,1,5751.5851063831  
13,1,7177.2526595744  
13,1,5112.32  
13,1,9158.3729838709  
13,1,6905.4228723406  
13,1,6786.25  
13,1,7183  
13,1,11672.7986111112  
13,1,6282.3725490198  
13,1,11164.7853773583  
13,1,10340.5588235294  
13,1,5011.7045454545  
13,1,11804.5306122447  
13,1,6705.7234042554  
13,1,6766.2105263158  
13,1,6231.5535714286  
13,1,9621.0000000001  
13,1,8027.3141025642  
13,1,7080.0000000001  
13,1,17306.3641304348  
13,1,12869.9743589743  
13,1,5012.375  
13,1,19363.7116564417  
13,1,8650.6861702127  
13,1,5542.9024390244  
13,1,5708.2638888888  
13,1,7033.4142857142  
13,1,12838.0707547172  
13,1,5490.09375  
13,1,6456.5  
13,1,5234.1521739131  
13,1,5077.7187500001  
13,1,5530.525  
13,1,5135.2034313727  
13,1,15095.8586956519  
13,1,7052.6785714286  
13,1,11158.098360656  
13,1,6784.5357142857  
13,1,5244.2329545455  
13,1,8170.3478260871  
13,1,7692.9566326529  
13,1,12566.8820754717  
13,1,5974.3999999999  
13,1,6002.2037914693  
13,1,17857.108108108  
13,1,7020.8066037736  
13,1,6780.2263513513  
13,1,6853.914893617

13,1,7679  
13,1,6549.0204081634  
13,1,16707.7250000001  
13,1,7809.3194444444  
13,1,5763.2173913046  
13,1,7093.7146739131  
13,1,7093.5625  
13,1,5345.2804878049  
13,1,6525.7948717949  
13,1,5218.8461538461  
13,1,7050.2127659575  
13,1,5527.7307692308  
13,1,8391.511627907  
13,1,8371.085106383  
13,1,6111.0058139535  
13,1,6454.2750000001  
13,1,9491.5853658536  
13,1,7494.1674528302  
13,1,5286.1656976744  
13,1,19665.6129807697  
13,1,5141.71484375  
13,1,5067.90625  
13,1,5543.2556818182  
13,1,6881.2928571429  
13,1,5595.1944444444  
13,1,5148.5714285714  
13,1,5092.7424242424  
13,1,6476.4852941178  
13,1,5052.2500000001  
13,1,5807.3255813953  
13,1,6745.1890243904  
13,1,8484.9934210526  
13,1,5308.6328125  
13,1,6354.1640625  
13,1,8006.9976303314  
13,1,6460.5568181818  
13,1,7687.3454545454  
13,1,6209.3947368421  
13,1,6406.638888889  
13,1,12691.3384146337  
13,1,5717.7090517242  
13,1,7079.7451923077  
13,1,7014.2880434782  
13,1,8608.875  
13,1,15692.6340909092  
13,1,10298.8912037034  
13,1,5199.9663461537  
13,1,8783.2727272727  
13,1,5223.43125  
13,1,5802.0409090909  
13,1,9272.4000000002  
13,1,6268.2613636364  
13,1,10813.9282407408  
13,1,6092.625  
13,1,19946.631465517  
13,1,5426.8736263736  
13,1,5967.4305555555  
13,1,5368.2249999999  
13,1,6388.2875000001  
13,1,19348.4090909092  
13,1,5843.5535714285  
13,1,8033.83125  
13,1,5193.3318965517  
13,1,7263.25  
13,1,5345.75  
13,1,5367.4166666667

13,1,6182.2717391304  
13,1,9366.0408163265  
13,1,5763.96875  
13,1,6522.0060975609  
13,1,5542.5759162302  
13,1,5718.224489796  
13,1,5618.55  
13,1,6270.5094339622  
13,1,5734.6886792452  
13,1,6362.6116071428  
13,1,13038.9857954546  
13,1,9215.9056603774  
13,1,8167.5833333335  
13,1,10377.822222222  
13,1,7976.7857142858  
13,1,7423.380952381  
13,1,10409.9695121951  
13,1,5037.0104166667  
13,1,7694.8477272726  
13,1,13282.0909090907  
13,1,7928.5133928573  
13,1,5486.53125  
13,1,11279.3999999997  
13,1,6219.4285714286  
13,1,10453.8062499998  
13,1,8582.4007352941  
13,1,5139.765625  
13,1,5367.7037037036  
14,2,12329.8402777778  
14,2,10799.3414634143  
14,2,5091.2941176471  
14,2,8234.5489130434  
14,2,6827.7448979592  
14,2,8231.423076923  
14,2,11224.0528846153  
14,2,9430.0238095237  
14,2,9084.875  
14,2,6678.5033783784  
14,2,7585.5  
14,2,8415.634375  
14,2,5435.9331395349  
14,2,5991.4399999999  
14,2,7014.5  
14,2,7996.5142857142  
14,2,8947.4324324325  
14,2,6347.8382352942  
14,2,7263.7927631578  
14,2,6623.0833333333  
14,2,8270.8571428571  
14,2,5984.2083333334  
14,2,5187.08984375  
14,2,8268.431451613  
14,2,9539.5348837206  
14,2,8859.8073770491  
14,2,5897.8  
14,2,5939.9605263157  
14,2,5573.5503144654  
14,2,5035.9264705883  
14,2,9364.6859756098  
14,2,6609.671875  
14,2,6837.3292682926  
14,2,8707.125  
14,2,6746.4358974358  
14,2,7482.9738372093  
14,2,6663.4034090906  
14,2,7932.5187499999

14,2,9661.3550000001  
14,2,5426.9107142858  
14,2,8074.2403846155  
14,2,5402.9593749999  
14,2,5461.625  
14,2,6395.2102272726  
14,2,7759.6153846155  
14,2,5383.8  
14,2,6018.0755208334  
14,2,6915.4244186047  
14,2,7796.2721518986  
14,2,8169.8166666667  
14,2,6431.0539772726  
14,2,5187.2942307693  
14,2,7246.7325581395  
14,2,5944.453125  
14,2,5303.9999999999  
14,2,7568.4941860464  
14,2,10455.40625  
14,2,7214.625  
14,2,5600.1666666668  
14,2,10174.0714285716  
14,2,6389.5689655172  
14,2,7493.5333333334  
14,2,6508.48  
14,2,7818.9821428571  
14,2,6093.9285714286  
14,2,9424.4828431372  
14,2,5846.9264705883  
14,2,7536.9268292683  
14,2,8327.3357142858  
14,2,5645  
14,2,9006.0416666667  
14,2,6012.2596153847  
14,2,5919.4375  
14,2,5221.8604651164  
14,2,6954.9513888889  
14,2,8851.5555555556  
14,2,8542.5416666667  
14,2,5421.222972973  
14,2,8018.8369565217  
14,2,5820.7954545454  
14,2,5236.5913461537  
14,2,5409.8260869563  
14,2,5583.6666666667  
14,2,5054.1105769231  
14,2,7504.0045454547  
14,2,5441.9291044776  
14,2,6629.7105263158  
14,2,5131.1621621622  
14,2,5443.9396551725  
14,2,5303.9847715736  
14,2,6558.5  
14,2,5380.2865853658  
14,2,5633.0638297872  
14,2,6375.1666666666  
14,2,5017.7959183675  
14,2,5815.1122448979  
14,2,6192.2884615387  
14,2,9050.95  
14,2,6067.1275510203  
14,2,6538.1934523809  
14,2,6256.243902439  
14,2,7604.5367647059  
14,2,5749.1861702127  
14,2,5022.4638888889

14,2,5183.7195121952  
14,2,6500.5000000001  
14,2,5244.65625  
15,1,6067.8170731706  
15,1,8438.4840425533  
15,1,5014.9146341464  
15,1,5599.7383720931  
15,1,7674.6071428572  
15,1,13382.8717948716  
15,1,7369.78125  
15,1,5700.4681818181  
15,1,5700.4050925926  
15,1,10081.5775862064  
15,1,6873.2010869566  
15,1,17848.5966981135  
15,1,8275.9772727272  
15,1,11567.4107142858  
15,1,5892.2635135135  
15,1,10646.2812500001  
15,1,5557.5399999999  
15,1,6470.1935483869  
15,1,10226.2875000001  
15,1,14732.7267441858  
15,1,5264.6602564103  
15,1,6432.9482758622  
15,1,7015.1195652172  
15,1,12555.2276785715  
15,1,6577.8275862069  
15,1,6600.8031249999  
15,1,6523.9285714285  
15,1,14293.3829787233  
15,1,6140.6222826087  
15,1,8553.328125  
15,1,5917.6025641025  
15,1,15029.4861111113  
15,1,5404.2780748663  
15,1,6739.1388888888  
15,1,9603.7067307691  
15,1,5555.3859649122  
15,1,7267.340116279  
15,1,9295.2045454545  
15,1,6802.552631579  
15,1,10460.1249999999  
15,1,12266.7692307691  
15,1,16916.0524999998  
15,1,6094.4948979592  
15,1,5378.1046511628  
15,1,9507.4782608695  
15,1,7212.95625  
15,1,5423.2987804878  
15,1,11026.8479729729  
15,1,11088.2324999998  
15,1,6889.7795454547  
15,1,5492.8750000001  
15,1,16006.2125000001  
15,1,9753.1875000001  
15,1,10075.1041666666  
15,1,7257.15625  
15,1,5691.0288461538  
15,1,10619.1081081081  
15,1,6757.197368421  
15,1,17997.9428571428  
15,1,7580.9545454545  
15,1,5204.8725490196  
15,1,17331.7025862071  
15,1,14705.7788461543

15,1,13806.3541666665  
15,1,9309.5771276598  
15,1,7151.1644736842  
15,1,7072.625  
15,1,5499.6346153845  
15,1,5587.4255319149  
15,1,6877.5  
15,1,5397.0714285712  
15,1,8138.9467213116  
15,1,13951.1071428569  
15,1,5174.3085106383  
15,1,5540.0432692307  
15,1,9244.8375000001  
15,1,6781.4605263158  
15,1,8601.8472222224  
15,1,6254.0637755102  
15,1,7496.2164634147  
15,1,8331.1546052632  
15,1,6714.2641509433  
15,1,5915.8505434782  
15,1,5553.244680851  
15,1,12466.7234848484  
15,1,6784.3970588235  
15,1,16195.0532786888  
15,1,5912.4402173913  
15,1,6779.4361111111  
15,1,18543.2083333333  
15,1,8247.5892857143  
15,1,5148.8273809524  
15,1,7431.4261363637  
15,1,10210.1756756757  
15,1,6405.7169811321  
15,1,10811.0601851852  
15,1,5275.0865384615  
15,1,9424.3333333333  
15,1,9646.170212766  
15,1,5966.0445859871  
15,1,14361.2678571428  
15,1,9050.8958333333  
15,1,8705.0499999998  
15,1,7677.1297169812  
15,1,5280.1739130435  
15,1,5283.9470338983  
15,1,7757.5250000001  
15,1,7661.5714285715  
15,1,5132.0816326531  
15,1,5273.375  
15,1,5747.3618421053  
15,1,5989.3416666667  
15,1,7097.2870370369  
15,1,5507.6134020619  
15,1,16202.3124999998  
15,1,6066.8244680851  
15,1,10501.0792682925  
15,1,11342.8000000001  
15,1,10901.5476190477  
15,1,5712.6875  
15,1,11715.6530612246  
15,1,5436.1081081081  
15,1,8337.7632978723  
15,1,12108.1428571431  
15,1,7092.3720930233  
15,1,5044.6402439025  
15,1,16307.0364583335  
15,1,5706.7500000001  
15,1,5066.375

15,1,8761.0322580646  
15,1,9418.7307692307  
15,1,11157.3414634145  
15,1,5403.784090909  
15,1,9548.2926136365  
15,1,7693.5051020408  
15,1,6603.4237804875  
15,1,5170.6556603777  
15,1,13685.8636363635  
15,1,6072.375  
15,1,8864.4835526315  
15,1,7735.5654761906  
15,1,6313.9176829268  
15,1,5434.3909574468  
15,1,5503.0872093024  
15,1,6608.7526595745  
15,1,9172.861111111  
15,1,6249.9932432433  
15,1,5741.5  
15,1,7311.9727272727  
15,1,12671.1312500001  
15,1,6027.34375  
15,1,6967.6890243904  
15,1,16684.3157894736  
15,1,7081.6683673471  
15,1,5804.8605769232  
15,1,6161.0178571428  
15,1,6005.8779069766  
15,1,7344.6432926831  
15,1,5410.9453125  
15,1,8356.7297297298  
15,1,12428.7361111112  
15,1,10533.346153846  
15,1,8646.4464285714  
15,1,6067.4127358493  
15,1,7305  
15,1,12654.9999999999  
15,1,7390.9473684209  
15,1,17092.4127906976  
15,1,7667.7222222223  
15,1,12863.5480769231  
15,1,11595.4114583337  
15,1,19943.6875  
15,1,19224.3090909089  
15,1,5385.4468085105  
15,1,15912.6764705883  
15,1,11474.1696428572  
15,1,10733.9333333337  
15,1,9812.0133928572  
15,1,16486.1923076925  
15,1,7906.3356481482  
15,1,6708.955882353  
15,1,7120.5781249999  
15,1,11118.1653846156  
15,1,5621.347972973  
15,1,7717.5454545455  
15,1,5655.1875  
15,1,17963.0789473687  
15,1,6486.1006097561  
15,1,16021.046875  
15,1,7589.3369565215  
15,1,6284.0265957447  
15,1,10974.8292682924  
15,1,5741.2103960396  
15,1,5622.2380952382  
15,1,8234.3020833332

15,1,5299.3125  
15,1,8579.9423076923  
15,1,7717.171875  
15,1,5052.2307692307  
15,1,10296.9444444445  
15,1,5540.6904761904  
15,1,8694.2906976742  
15,1,5301.8431372549  
15,1,9153.2093749998  
15,1,7394.3214285713  
15,1,6429.625  
15,1,5014.5964285714  
15,1,9949.0775862067  
15,1,5082.3777777778  
15,1,6183.5  
15,1,9618.6470588236  
15,1,6469.3194444444  
15,1,5677.595  
15,1,5697.7613636363  
15,1,5557.0298913043  
15,1,5065.4857142857  
15,1,7389.53125  
15,1,6994.5673076923  
15,1,9103.25  
15,1,8233.3368055557  
15,1,10423.225490196  
15,1,9873.6428571427  
15,1,15409.7380952381  
15,1,7226.1489361703  
15,1,7933.6666666667  
15,1,6488.7333333334  
15,1,7891.5597826086  
15,1,14624.2358490567  
15,1,14278.3392857145  
15,1,8015.9090909092  
15,1,6327.4635416665  
15,1,7138.804245283  
15,1,5491.7578125  
15,1,5331.3199999999  
15,1,5022.3333333332  
15,1,5994.7674418604  
15,1,11096.0666666668  
15,1,14925.6704545453  
15,1,5693.3723404256  
15,1,9835.0749999999  
15,1,14610.8221153845  
15,1,12808.1707317076  
15,1,8115.8031914894  
15,1,6144.7142857143  
16,2,7478.1219512194  
16,2,5116.1191860465  
16,2,10982.980263158  
16,2,7244.5625  
16,2,6262.0909090909  
16,2,7262.5416666667  
16,2,5834.65  
16,2,5113.1999999999  
16,2,5284.6903409091  
16,2,8236.4999999999  
16,2,5846.6491228069  
16,2,6133.8636363636  
16,2,5407.5681818182  
16,2,5236.3928571429  
16,2,5366.0769230769  
16,2,5117.6675  
16,2,7172.455

16,2,9340.4687500001  
16,2,5578.8303571428  
16,2,6073.6630434783  
16,2,6684.6000000001  
16,2,5947.7659574468  
16,2,6942.2616279072  
16,2,5480.3365384617  
16,2,7164.8375  
16,2,8342.146067416  
16,2,7488.546875  
16,2,5246.8146551725  
16,2,5557.4042553191  
16,2,7448.2499999999  
16,2,6576.4140625  
16,2,5572.2236842106  
16,2,5178  
16,2,5019.9791666667  
16,2,5307.2291666669  
16,2,8172.0092592594  
16,2,5397.9999999999  
16,2,5528.5  
16,2,5447.6  
16,2,7113.6437500002  
16,2,9215.1416666667  
16,2,8129.9821428573  
16,2,5789.7478813559  
16,2,5088.0319767443  
16,2,5934.205882353  
16,2,7110.3125  
16,2,8965.7367021277  
16,2,8321.0543478259  
16,2,6856.8000000001  
16,2,9676.9937499999  
16,2,7726.0232558139  
16,2,8326.143292683  
16,2,6680.6171875  
16,2,8445.4182692311  
16,2,5254.9259259259  
16,2,5160.6139705883  
16,2,5840.0528846155  
16,2,5662.1586538462  
16,2,5833.3125  
16,2,7155.7720588237  
16,2,6169.1595744682  
16,2,6384.2173913044  
16,2,5336.3072916667  
16,2,5653.2180851064  
16,2,8068.2222222223  
16,2,10051.8177966102  
16,2,8389.0882352941  
16,2,8082.8235294118  
16,2,6710.4074074074  
16,2,8590.1914893617  
16,2,7380.33125  
16,2,13284.3522727272  
16,2,5715.4795918369  
16,2,6583.6157407409  
16,2,7784.2999999999  
16,2,5951.0677083333  
16,2,6887.130952381  
16,2,5804.2093023256  
16,2,6927.9813829787  
16,2,8604.8175675675  
16,2,5842.9910714285  
16,2,8441.4962121212  
16,2,5026.4523809523

16,2,7752.0125  
16,2,6426.40625  
16,2,8421.8125  
16,2,6006.119047619  
16,2,5060.6000000002  
16,2,5345.5526315789  
16,2,6909.2627551021  
16,2,8841.7261904762  
16,2,7327.1711956522  
16,2,11429.3392857144  
16,2,8508.519736842  
16,2,5899.6337209301  
16,2,7220.3541666666  
16,2,8891.224537037  
16,2,5270.6923076922  
16,2,6027.75  
16,2,7059.6861702129  
16,2,7205.7142857143  
16,2,6569.0568181818  
16,2,5496.37109375  
16,2,7996.5500000001  
16,2,6689.4085365852  
16,2,6324.3299180325  
17,1,8257.0324999999  
17,1,6191.3452380953  
17,1,6855.5855263157  
17,1,10596.6025641025  
17,1,6049.8693181818  
17,1,18726.7099999996  
17,1,5061.8909574468  
17,1,6951.4423076923  
17,1,16583.5025125628  
17,1,15576.2  
17,1,7772.2263513514  
17,1,7656.5059523811  
17,1,14610.5227272726  
17,1,5949.35  
17,1,6228.03125  
17,1,5436.9857142856  
17,1,8096.7401315791  
17,1,9260.8750000001  
17,1,15310.7725409835  
17,1,6933.1627906977  
17,1,5904.3  
17,1,11279.170212766  
17,1,6801.5471698111  
17,1,8771.283018868  
17,1,16264.3819444444  
17,1,10937.8656716417  
17,1,7453.3877551021  
17,1,6445.4909090907  
17,1,10074.511627907  
17,1,5512.4402515724  
17,1,6180.7888888889  
17,1,17594.5047169812  
17,1,7494.0290178571  
17,1,5200.2536764705  
17,1,6611.7578125  
17,1,7212.3680555555  
17,1,6653.3624999999  
17,1,6565.5736196319  
17,1,6622.0106382978  
17,1,5173.6306818182  
17,1,7893.4270833333  
17,1,5622.0833333333  
17,1,5901.4679487179

17,1,6126.5851063829  
17,1,5253.125  
17,1,12147.6510416667  
17,1,15121.5197368424  
17,1,13153.109090909  
17,1,5699.5089285713  
17,1,9653.5204081633  
17,1,5876.3415178572  
17,1,8004.5459183675  
17,1,5766.3333333333  
17,1,16357.6927083334  
17,1,5982.375  
17,1,10445.6875  
17,1,6498.3465909092  
17,1,15199.0199999997  
17,1,5777.6304347827  
17,1,5073.1687499998  
17,1,5599.195652174  
17,1,10916.5625  
17,1,6122.625  
17,1,7365.5230263158  
17,1,13815.8837209303  
17,1,13609.5572916666  
17,1,11187.945652174  
17,1,5095.2105263158  
17,1,10525.0965909091  
17,1,10321.3210227273  
17,1,5901.3564814814  
17,1,9004.625  
17,1,5913.4573170731  
17,1,6764.8175675676  
17,1,6406.3166666667  
17,1,18153.9148936171  
17,1,7122.8947368421  
17,1,7961.607142857  
17,1,17811.2440476194  
17,1,6887.7663043478  
17,1,12969.703125  
17,1,7534.1630434782  
17,1,10893.1612903227  
17,1,6601.9926470589  
17,1,9190.7692307693  
17,1,18054.4438775511  
17,1,13402.3499999998  
17,1,6084.2578125  
17,1,6803.0209580839  
17,1,8056.3624999998  
17,1,6080.5697674418  
17,1,10793.8421052632  
17,1,6020.7202380954  
17,1,5495.7499999999  
17,1,16038.5948275861  
17,1,5743.7125000002  
17,1,8362.5921052631  
17,1,6882.1052631579  
17,1,6502.75  
17,1,12691.265625  
17,1,5838.5755813953  
17,1,5455.8023255814  
17,1,6116.230392157  
17,1,8208.4531249999  
17,1,13142.0612244896  
17,1,5885.6451612904  
17,1,6197.1863207547  
17,1,5400.9593023256  
17,1,8879.2083333334

17,1,6535.4326923077  
17,1,6701.0833333334  
17,1,5477.9021739131  
17,1,9994.7213541669  
17,1,6929.6489361701  
17,1,10198.1931818181  
17,1,18482.8210227276  
17,1,9704.4285714285  
17,1,5730.8070652173  
17,1,9876.5277777778  
17,1,5913.3052325583  
17,1,8634.5  
17,1,10549.9166666666  
17,1,5630.4857954547  
17,1,11571.9363636363  
17,1,5681.826923077  
17,1,6704.85106383  
17,1,6108.3750000001  
17,1,11222.7954545456  
17,1,7635.0000000001  
17,1,14183.4923469385  
17,1,12181.125  
17,1,8818  
17,1,5270.8780487805  
17,1,7969.4947916666  
17,1,6493.2163461539  
17,1,12622.1041666667  
17,1,10928.6489361701  
17,1,11783.6987179487  
17,1,18713.8532608696  
17,1,7479.0750000001  
17,1,7596.6356382977  
17,1,13015.9695121952  
17,1,16006.4974489795  
17,1,7056.5880681819  
17,1,5599.8092105263  
17,1,8028  
17,1,8683.265625  
17,1,7131.4651162791  
17,1,8169.0212765957  
17,1,9394.0930232559  
17,1,8712.6527777777  
17,1,5524.2333333334  
17,1,8498.8718749999  
17,1,5416.1590909092  
17,1,12084.3555555557  
17,1,5815.3125  
17,1,7595.0625000001  
17,1,5025.7469512195  
17,1,5526.3333333333  
17,1,6206.7027777778  
17,1,6395.3199152543  
17,1,9723.5047169811  
17,1,7050.4521276596  
17,1,9276.7413793104  
17,1,16535.7142857143  
17,1,5792.794117647  
17,1,6919.5322580645  
17,1,6572.5677083332  
17,1,13769.7526041669  
17,1,7170.34375  
17,1,6263.318181818  
17,1,7540.7720588236  
17,1,6583.7  
17,1,13499.8030303027  
17,1,7728.8292682927

17,1,7219.230263158  
17,1,5905.8005319149  
17,1,9576.6392857142  
17,1,9954.3773584906  
17,1,7703.4975  
17,1,6708.3125  
17,1,5480.8277027027  
17,1,10072.7477678572  
17,1,8592.1145833333  
17,1,7929.3950000001  
17,1,9073.0433673468  
17,1,7075.2647058823  
17,1,7782.3617021277  
17,1,5985.9825000002  
17,1,17846.6654411766  
17,1,8054.6874999999  
17,1,8961.875  
17,1,5026.660326087  
17,1,6184.5285714286  
17,1,12082.2500000001  
17,1,11234.057065217  
17,1,7897.9017857143  
17,1,5520.4634146341  
17,1,12005.9407894739  
17,1,5426.5400000001  
17,1,8925.5756578947  
17,1,14722.8666666667  
17,1,5952.4592391305  
17,1,5707.2812500001  
17,1,7783.4352941175  
17,1,12850.0999999999  
17,1,8388.8843749999  
17,1,5546.1363636361  
17,1,9628.1354166668  
17,1,11459.2526595745  
17,1,7910.7844827588  
17,1,7727.9941860465  
17,1,10488.1388888888  
17,1,14837.6704545456  
17,1,5027.9642857143  
17,1,6723.7565789473  
17,1,16324.5460526317  
17,1,7924.5812499999  
17,1,9077.4672619048  
17,1,8915.0074626867  
17,1,6153.9375000001  
17,1,5530.1104651162  
17,1,5676.7272727272  
17,1,8127.0217391304  
17,1,5106.0250000001  
17,1,10059.5304878048  
18,2,5345.1500000001  
18,2,5131.0923913044  
18,2,5722.076923077  
18,2,11659.4147727272  
18,2,6304.1951219512  
18,2,6855.113372093  
18,2,5880.7407407406  
18,2,6402.5999999999  
18,2,8163.274390244  
18,2,10337.6904761906  
18,2,6487.9375000001  
18,2,5963.1385869566  
18,2,5884.3823529412  
18,2,6441.4594594595  
18,2,7362.7241379306

18,2,7108.9635416668  
18,2,8785.0906250001  
18,2,5479.572368421  
18,2,7718.0851063829  
18,2,9007.15625  
18,2,8896.6875  
18,2,9069.6857142857  
18,2,5832.15  
18,2,6707.6201923076  
18,2,6089.6714285714  
18,2,7051.25  
18,2,6519.1890243903  
18,2,5639.2298387097  
18,2,5106.5434782609  
18,2,6287.6  
18,2,8266.0208333333  
18,2,7567.8125  
18,2,9004.8321428572  
18,2,8977.7526881719  
18,2,5953.1756756757  
18,2,6695.2155963305  
18,2,10425.0324074074  
18,2,6039.875  
18,2,6297.6875  
18,2,5025.3571428571  
18,2,7970.0887096774  
18,2,6956.7045454545  
18,2,5627.2302631579  
18,2,7274.6981132076  
18,2,6512.4521276597  
18,2,6511.1397058825  
18,2,6185.4090909092  
18,2,10324.8529411765  
18,2,9914.2146226417  
18,2,7684.5795454545  
18,2,8985.0110294118  
18,2,8664.8072916667  
18,2,6928.4761904763  
18,2,12437.1666666666  
18,2,5592.4000000001  
18,2,7471.777173913  
18,2,5684.3513513514  
18,2,6007.9750000001  
18,2,9156.4  
18,2,6480.4852941175  
18,2,12299.912878788  
18,2,7803.0863095237  
18,2,8756.786764706  
18,2,8225.1067073171  
18,2,7277.7209302325  
18,2,5044.7446808509  
18,2,8658.2794117646  
18,2,6794.3187500002  
18,2,5480.6486486486  
18,2,5481.9968750001  
18,2,5796.909574468  
18,2,8568.1490384613  
18,2,5979.7613636364  
18,2,8533.5573770492  
18,2,8256.878125  
18,2,8513.8290816325  
18,2,6856.9940476191  
18,2,6301.4312499999  
18,2,5318.21484375  
18,2,6354.1250000001  
18,2,5965.3111702128

18,2,5177.6083333333  
18,2,6051.875  
18,2,5730.7634730539  
18,2,8046.8796296296  
18,2,6287.3673469388  
18,2,9616.6489361702  
18,2,6902.1730769231  
18,2,9583.8190789474  
18,2,7250.5590909093  
18,2,5096.5290697674  
18,2,5169.9111842106  
18,2,7073.5108695652  
18,2,6069.0743243244  
18,2,8470.8627450981  
18,2,9725.9315476192  
18,2,6036.3671874999  
18,2,5753.7642045455  
18,2,7866.6017441862  
18,2,5720.472972973  
18,2,5447.75  
18,2,6851.6  
18,2,12131.4583333334  
18,2,6228.3851351351  
18,2,8668.9945945944  
18,2,5724.6375  
18,2,6269.5599999998  
19,1,8160.9375000001  
19,1,7094.7039473685  
19,1,5671.2083333334  
19,1,7435.8265306122  
19,1,12470.6979166665  
19,1,7856.7364864865  
19,1,5976.7804878049  
19,1,5531.575  
19,1,10956.6531250001  
19,1,5101.1277777779  
19,1,6302.6480263158  
19,1,5560.3564814816  
19,1,15649.3894230768  
19,1,5892  
19,1,15608.276785714  
19,1,6361.3443877552  
19,1,6184.4709302327  
19,1,7084.1982758622  
19,1,5732.8488372094  
19,1,6176.1118421052  
19,1,5074.4182692308  
19,1,6578.2965116277  
19,1,14287.9545454546  
19,1,9185.487804878  
19,1,6571.7663043479  
19,1,5061.0026595745  
19,1,8964.78125  
19,1,5978.8511235955  
19,1,5916.7111111113  
19,1,5656.7255434783  
19,1,6188.6093750001  
19,1,6853.9583333334  
19,1,6143.25  
19,1,5621.4846938774  
19,1,7928.5  
19,1,8205.7613636364  
19,1,10658.2194444445  
19,1,6978.9648241208  
19,1,5109.265625  
19,1,9775.4825581395

19,1,9427.2819148936  
19,1,16986.7619047618  
19,1,5252.9359756099  
19,1,5647.2704081633  
19,1,11608.0227272729  
19,1,5363.6479591835  
19,1,5948.3173076924  
19,1,5201  
19,1,14217.8333333332  
19,1,7124.6397058823  
19,1,5253.2750000001  
19,1,8965.905612245  
19,1,19746  
19,1,8717.588235294  
19,1,6984.5624999998  
19,1,5019.6983695652  
19,1,5583.5909090909  
19,1,7182.9246031745  
19,1,5483.886627907  
19,1,8622.0294117647  
19,1,6865.4358974361  
19,1,5046.6875  
19,1,6261.9375  
19,1,9889.5  
19,1,17259.13125  
19,1,6023.8214285716  
19,1,5846.8676470588  
19,1,8621.2916666667  
19,1,7925.345  
19,1,13160.2244897959  
19,1,5005.9542682927  
19,1,5339.5174418605  
19,1,6703.3367346937  
19,1,8297.8571428571  
19,1,5091.2391304348  
19,1,5455.9244186048  
19,1,6910.3388157896  
19,1,10427.4756097561  
19,1,8651.5217391305  
19,1,7363.1158536586  
19,1,7479.4047619047  
19,1,7110.0098039215  
19,1,6099.3125  
19,1,11147.3224999996  
19,1,5770.1875  
19,1,8986.8975000001  
19,1,6344.9655172413  
19,1,6798.8295454546  
19,1,7397.5859375  
19,1,7270.6446078431  
19,1,6802.0624999997  
19,1,13530.5781249998  
19,1,12840.9270833333  
19,1,6503.4868421051  
19,1,12712.7222222222  
19,1,8593.6554054054  
19,1,9246.9512195122  
19,1,5208.1818181819  
19,1,6009.7109375  
19,1,5040.2441860466  
19,1,8185.25  
19,1,12673.731707317  
19,1,6042.6333333333  
19,1,7520.6141304347  
19,1,5604.355263158  
19,1,6118.9166666667

19,1,6017.6983695653  
19,1,5230.5172413793  
19,1,15469.5918367348  
19,1,9295.6216216214  
19,1,5024.9649122807  
19,1,6684.15  
19,1,19844.9805555556  
19,1,5072.05  
19,1,13661.1051136364  
19,1,9641.2500000001  
19,1,5034.4136904763  
19,1,12499  
19,1,6602.6845238095  
19,1,15528.5543478263  
19,1,7746.375  
19,1,9775.1143617024  
19,1,5544.9642857142  
19,1,5465.2659574468  
19,1,7466.7840909091  
19,1,11380.4196428572  
19,1,8207.7039473683  
19,1,17689.137755102  
19,1,8197.15625  
19,1,6506.0208333334  
19,1,6047.265625  
19,1,7932.20625  
19,1,6196.3714285715  
19,1,5345.2884615385  
19,1,9395.4305555555  
19,1,10128.4  
19,1,9470.9642857145  
19,1,7335  
19,1,5072.6916666667  
19,1,13057.3382352942  
19,1,7670.73  
19,1,8419.0472222223  
19,1,6890.1979166667  
19,1,7750.4770408164  
19,1,5173.3359375  
19,1,5410.8951612902  
19,1,8298.3506097561  
19,1,8461  
19,1,6396.5104166667  
19,1,19764.2053571427  
19,1,19262.6750000001  
19,1,7278.090909091  
19,1,13430.8004032261  
19,1,5614.465  
19,1,6030.9505813955  
19,1,7468.7196969697  
19,1,6359.7745098036  
19,1,6346.5517241379  
19,1,5615.8333333334  
19,1,6103.1953125  
19,1,9333.3372641508  
19,1,5028.6875000001  
19,1,11663.0182926827  
19,1,16677.9090909089  
19,1,5444.7896341463  
19,1,5825.9122807019  
19,1,7435.3281249999  
19,1,5540.5416666667  
19,1,9546.4308510638  
19,1,8814.3488372092  
19,1,7568.8125  
19,1,8190.7115384616

19,1,6482.5523255813  
19,1,6224.1041666668  
19,1,5034.6308139535  
19,1,5131.6666666666  
19,1,10743.6598837206  
19,1,15844.6382978721  
19,1,9368.258064516  
19,1,8203.6170212766  
19,1,5089.5945945946  
19,1,6382.7613636363  
19,1,16174.0250000004  
19,1,6346.6086956521  
19,1,13226.9659090908  
19,1,10933.1947674417  
19,1,18815.5795454547  
19,1,5343.2395833334  
19,1,5344.8453947368  
19,1,7500.5  
19,1,10622.9479166667  
19,1,6958.6346153846  
19,1,6463.4311224489  
19,1,5647.5833333333  
19,1,11695.5066964284  
19,1,5751.7499999999  
19,1,5490.4230769232  
19,1,6817.0227272728  
19,1,9826.5  
19,1,7087.1527777778  
19,1,5804.2644230771  
19,1,5638.0744680851  
19,1,8698.081395349  
19,1,7335.8721590911  
19,1,8013.2500000001  
19,1,10977.5290697677  
19,1,8577.8854166668  
19,1,7280.4617346938  
19,1,7995.4361702126  
19,1,11537.6153846152  
19,1,7640.7548076923  
19,1,5884.6399999999  
19,1,18178.6666666664  
19,1,9664.6415094339  
19,1,7551.7571428571  
19,1,12598.4507575757  
19,1,7743.2194444445  
19,1,5816.4722222223  
19,1,17745.3333333332  
20,2,6343.1363636364  
20,2,6701.3513513512  
20,2,7753.2238372093  
20,2,10668.0274390241  
20,2,9504.6875  
20,2,6941.0147058821  
20,2,6752.0810810811  
20,2,11384.6276595745  
20,2,9579.1428571429  
20,2,5861.9017857142  
20,2,8531.2250000002  
20,2,8543.4999999999  
20,2,8652.8372093025  
20,2,9329.6041666667  
20,2,5301.7575757576  
20,2,10573.5250000002  
20,2,6833.421875  
20,2,7228.6273584906  
20,2,6647.4642857143

20,2,5637.1632653061  
20,2,6824.8231707318  
20,2,11068.552631579  
20,2,5442.175  
20,2,8824.1029411764  
20,2,8624.0199999998  
20,2,6560.0757575757  
20,2,5690.1750000001  
20,2,5012.8170731707  
20,2,6020.21  
20,2,6737.2010869565  
20,2,7865.2441860466  
20,2,5063.2732558139  
20,2,5636.8636363636  
20,2,8344.6634615383  
20,2,7368.2857142857  
20,2,5264.8048780488  
20,2,6459.5763888889  
20,2,8345.9047619048  
20,2,8190.7692307692  
20,2,5287.9333333334  
20,2,6207.8250000001  
20,2,5114.7529069768  
20,2,5670.3292682927  
20,2,6591.9021739131  
20,2,5373.5325  
20,2,5412.140350877  
20,2,5839.8810975612  
20,2,6216.9069767441  
20,2,7333.8260869565  
20,2,7285.4042553192  
20,2,7893.3628048781  
20,2,5483.4273255815  
20,2,8876.592105263  
20,2,5481.9204545455  
20,2,5344.5546875  
20,2,9007.1524390242  
20,2,6387.7790697674  
20,2,5329.1875  
20,2,8319.0892857142  
20,2,5405.8611111112  
20,2,6305.3414634147  
20,2,5843.2708333335  
20,2,6192.0460526316  
20,2,7671.3706896551  
20,2,5866.8867924527  
20,2,10117.8222222223  
20,2,10334.8000000002  
20,2,5199.3076923078  
20,2,7658.4125000001  
20,2,5568.4573170733  
20,2,6198.9011627908  
20,2,6589.0477941176  
20,2,5428.2083333335  
20,2,5344.5148809524  
20,2,6058.2352941177  
20,2,8994.1403061224  
20,2,7698.4239130435  
20,2,5856.7013888891  
20,2,7273.8786764706  
20,2,7926.4999999998  
20,2,6326.171875  
20,2,6167.2916666666  
20,2,6626.7727272726  
20,2,6349.4431818181  
20,2,5939.6458333332

20,2,10218.3205128205  
20,2,5328.6448863635  
20,2,5059.4899999999  
20,2,5529.6999999998  
20,2,5350.1931818181  
20,2,8326.0606060605  
20,2,6608.552631579  
20,2,8284.5099999999  
20,2,5045.28125  
20,2,6928.3201219512  
20,2,7809.6057692307  
20,2,7412.125  
20,2,6103.0771276596  
20,2,5576.625  
20,2,5490.4375  
20,2,5692.5000000001  
20,2,6814.0909090908  
20,2,5015.108974359  
20,2,10070.3658536586  
20,2,7852.6686046512  
20,2,6163.8749999999  
20,2,7269.1352201258  
20,2,6125.0944444443  
20,2,5899.1428571428  
20,2,5856.3321428572  
20,2,6254.338235294  
20,2,5885.8461538462  
20,2,6756.9425675676  
20,2,7579.7777777779  
20,2,9203.7272727273  
20,2,5620.74  
20,2,5293.7142857142  
20,2,5026.2528409091  
20,2,7567.7134146341  
20,2,6942.2305555558  
20,2,6366.7406250001  
20,2,7034.0000000001  
20,2,9954.7687499999  
20,2,5187.7234042553  
20,2,7207.5928571429  
20,2,6620.435897436  
20,2,6902.3478260869  
20,2,5822.5576923077  
20,2,5009.6988636363  
20,2,6555.7000000001  
21,1,11237  
21,1,5049.6875  
21,1,9572.3058510635  
21,1,8211.7195121951  
21,1,5544.8835978837  
21,1,6707.6492146597  
21,1,8302.237244898  
21,1,7283.75  
21,1,5093.0581395348  
21,1,15898.8680555552  
21,1,7771.2727272729  
21,1,10937.4342105264  
21,1,5671.735  
21,1,12411.918269231  
21,1,7228.7743902439  
21,1,6376.5  
21,1,10022.015981735  
21,1,8614.8499999999  
21,1,5210.0434782609  
21,1,5607.44140625  
21,1,10516.3909090908

21,1,8201.45  
21,1,18666.3076923079  
21,1,7785.9128787879  
21,1,7124.7448979591  
21,1,5572.8265306124  
21,1,7085.9767441861  
21,1,19084.7625000002  
21,1,8789.0540540541  
21,1,6352.4755434782  
21,1,8160.7117346938  
21,1,6863.875  
21,1,8088.5  
21,1,7124.2916666666  
21,1,15771.4285714285  
21,1,7779.5  
21,1,13978.0416666666  
21,1,11305.18627451  
21,1,7407.9250000001  
21,1,8986.3942307692  
21,1,5798.7727272728  
21,1,7450.779296875  
21,1,5685.673076923  
21,1,7231.765957447  
21,1,5519.126984127  
21,1,6039.3125  
21,1,18059.6744186046  
21,1,6675.3048780488  
21,1,11743.5  
21,1,5037.9619565218  
21,1,5634.5930232559  
21,1,12227.9249999999  
21,1,5054.165625  
21,1,6653.4878048781  
21,1,6226.9488636363  
21,1,6644.625  
21,1,5504.7109375  
21,1,5711.4487179488  
21,1,5404.1303191489  
21,1,5785.125  
21,1,10000.2012195121  
21,1,7595.8571428572  
21,1,8700.4594594594  
21,1,6884.75  
21,1,12791.0306603774  
21,1,5138.3333333332  
21,1,13642.9255319144  
21,1,5017.445945946  
21,1,10235.8958333334  
21,1,8644.2598684211  
21,1,5572.3749999999  
21,1,16376.1467391306  
21,1,18463.5  
21,1,13888.2818181814  
21,1,18990.0232558138  
21,1,6905.3947368422  
21,1,6101.1754385967  
21,1,12618.2499999998  
21,1,7145.2073170731  
21,1,6975.5538461538  
21,1,8521  
21,1,5638.1493902439  
21,1,5519.6585365854  
21,1,6080.0243055555  
21,1,12765.8149999999  
21,1,7408.6153846153  
21,1,7789.0657894737

21,1,7665.2173913043  
21,1,6305.3916666667  
21,1,12789.2305555556  
21,1,9530.9166666667  
21,1,5873.59375  
21,1,8934.4310344827  
21,1,6033.8776595746  
21,1,5034.326923077  
21,1,8276.6219512195  
21,1,8262.7  
21,1,8494.7045454544  
21,1,6691.4042553191  
21,1,17568.5384615384  
21,1,6308.761904762  
21,1,7748.3333333333  
21,1,6340.59375  
21,1,8180.9880952382  
21,1,10066.6764705882  
21,1,5480.3024193548  
21,1,6240.3597560977  
21,1,5515.9500000001  
21,1,18780.238095238  
21,1,5761.119680851  
21,1,5997.3977272727  
21,1,14704.2352941178  
21,1,6273.8203124999  
21,1,5336.0000000001  
21,1,8194.9763513513  
21,1,12448.8723404256  
21,1,18525.7412790697  
21,1,11880.0977272727  
21,1,5102.32421875  
21,1,8536.0196078431  
21,1,13651.6046511628  
21,1,9200.1388888889  
21,1,7770.5999999999  
21,1,8668.6861702129  
21,1,7272.7872340426  
21,1,16686.7569444443  
21,1,8936.7732558139  
21,1,11886.8343749997  
21,1,18323.6785714287  
21,1,5417.5952380952  
21,1,8522.0208333333  
21,1,5149.3974358974  
21,1,9529.2282608696  
21,1,8579.1522727273  
21,1,7606.5919811319  
21,1,10213.1379310345  
21,1,16522.6155778894  
21,1,7173.4875000001  
21,1,5478.3255813954  
21,1,15029.358695652  
21,1,5025.8374999999  
21,1,10652.6835106384  
21,1,8199.0571428571  
21,1,9583.0104166667  
21,1,19735.5277777779  
21,1,15285.4583333334  
21,1,6660.7548076924  
21,1,11101.3928571428  
21,1,5782.125  
21,1,9421.9090909091  
21,1,7056.5151515154  
21,1,17522.9722222224  
21,1,5777.4335106384

21,1,11713.9423076919  
21,1,5389.98125  
21,1,6652.8749999999  
21,1,9884.7547169812  
21,1,10515.1046511628  
21,1,6092.8515625002  
21,1,9233.027027027  
21,1,5082.2352941177  
21,1,6964.2222222222  
21,1,12135.6521739132  
21,1,16311.59375  
21,1,5088.7009803921  
21,1,10012.6486486487  
21,1,5410.6125  
21,1,5527.2058823529  
21,1,5535.0700000001  
21,1,5918  
21,1,6702.2022727272  
21,1,8665.2749999997  
21,1,5256.0598958332  
21,1,17128.8833333336  
21,1,9777.659375  
21,1,6525.5  
21,1,7396.3459302326  
21,1,5258.03125  
21,1,16919.3601694915  
21,1,6368.9722222223  
21,1,5724.3181818181  
21,1,8181.25  
21,1,6399.896226415  
21,1,18400.18  
21,1,8308.6216216217  
21,1,9545.0510204082  
21,1,15133.5714285713  
21,1,6675.1020408164  
22,2,7433.3787878788  
22,2,8225.9062499999  
22,2,5884.4522058823  
22,2,5454.375  
22,2,5053.552631579  
22,2,8658.9807692307  
22,2,8441.7613636363  
22,2,5389.4407894737  
22,2,5516.3256578948  
22,2,5674.5487804878  
22,2,5916.7954545454  
22,2,8419  
22,2,7455.5853658535  
22,2,6104.5197368421  
22,2,9220.8625000001  
22,2,5355.125  
22,2,6693.1375  
22,2,6726.2499999999  
22,2,6043.2499999999  
22,2,5146.0178571429  
22,2,6168.046875  
22,2,7971.625  
22,2,6998.858974359  
22,2,7962.5208333334  
22,2,6450.4666666666  
22,2,7369.3026315789  
22,2,5242.6166666667  
22,2,8985.53125  
22,2,6056.1481481481  
22,2,5265.9  
22,2,9870.165625

22,2,5818.3088235294  
22,2,6324.7916666668  
22,2,5766.6341463414  
22,2,5623.7886904762  
22,2,6336.1005434782  
22,2,6138.8076923077  
22,2,6869.2166666667  
22,2,5698.7016129031  
22,2,8305.2690217391  
22,2,6644.1363636363  
22,2,5485.7978723405  
22,2,7177.0372340425  
22,2,6534.1011904762  
22,2,5099.8125  
22,2,7711.7092391306  
22,2,6588.5625  
22,2,6898.5784883719  
22,2,6186.8940217393  
22,2,10177.1315789475  
22,2,6121.3671875  
22,2,6040.2305555555  
22,2,8370.0771276596  
22,2,8390.0803571428  
22,2,9447.0172413792  
22,2,5795.3392857142  
22,2,6270.4879807693  
22,2,11423.3557692307  
22,2,6824.1047297296  
22,2,10574.2678571429  
22,2,5304.5052083332  
22,2,5167.65625  
22,2,7373.9759615384  
22,2,12589.1317567568  
22,2,6375.8536585365  
22,2,5766.5425531915  
22,2,6911.7261904762  
22,2,8430.6646341464  
22,2,10419.7000000002  
22,2,7110.6693548387  
22,2,5775.29  
22,2,6578.8727272728  
22,2,9443.4281914893  
22,2,5055.6551724137  
22,2,7325.8974358974  
22,2,5716.4438775511  
22,2,10533.5975609755  
22,2,7521.3109756097  
22,2,9436.4947916666  
22,2,8272.8918918919  
22,2,6372.6465517242  
22,2,6008.25625  
22,2,8692.6  
22,2,5715.8676470588  
22,2,7245.1941489361  
22,2,6551.0857142857  
22,2,5657.4891304348  
22,2,6479.5  
22,2,10648.8378378379  
22,2,7877.8970588236  
22,2,8974.8648648648  
22,2,13012.5887096774  
22,2,7681.7407407408  
22,2,5616.4460227274  
22,2,6838.0510204083  
22,2,6340.0673076923  
22,2,7263.9418604652

22,2,7044.2058823528  
23,1,5602.0697674418  
23,1,6054.2119565218  
23,1,5816.3829787235  
23,1,8634.3125  
23,1,6290.4411764706  
23,1,5157.7380952382  
23,1,8362.1779661018  
23,1,5738.1581632653  
23,1,10459.3673469388  
23,1,7932.1184210528  
23,1,6486.7045454546  
23,1,5116.6607142858  
23,1,5953.9632352942  
23,1,5535.96484375  
23,1,5150.6547619048  
23,1,6154.2755681818  
23,1,7605.625  
23,1,5527.4374999999  
23,1,5427.8088235294  
23,1,8309.4292452828  
23,1,5680.4886363638  
23,1,7040.3952702704  
23,1,5426.25  
23,1,6902.7083333333  
23,1,5395.780172414  
23,1,15266.2678571428  
23,1,8009.6449999999  
23,1,5845.8163265306  
23,1,9177.55  
23,1,7645.7378048781  
23,1,17366.0961538459  
23,1,5484.78125  
23,1,5323.8125  
23,1,7433.4081632653  
23,1,18889.8725490196  
23,1,7234.9519230768  
23,1,5842.181818182  
23,1,8566.431372549  
23,1,5766.1170212766  
23,1,7653.1617647059  
23,1,14080.1063829789  
23,1,8434.9227272727  
23,1,10388.340909091  
23,1,5720.3392857143  
23,1,5936.875  
23,1,14002.046875  
23,1,10862.6964285712  
23,1,19845.3782051282  
23,1,6787.6250000001  
23,1,10004.2664473686  
23,1,7051.76875  
23,1,12169.71875  
23,1,9584.010638298  
23,1,5557.1079545455  
23,1,17170.5254629629  
23,1,10021.0425531919  
23,1,6499.6842105262  
23,1,10020.445945946  
23,1,17893.25  
23,1,5794.2142857142  
23,1,5614.2589285715  
23,1,5198.5348837209  
23,1,8470.7205882354  
23,1,5226.3810975609  
23,1,16728.8500000002

23,1,6705.4898648648  
23,1,9858.0663265307  
23,1,5123.16875  
23,1,5724.2972972974  
23,1,9254.513888889  
23,1,5020.7000000001  
23,1,15759.2683823532  
23,1,11968.7999999999  
23,1,19520.3505154636  
23,1,5370.0833333334  
23,1,9639.3579545454  
23,1,8657.7325581395  
23,1,14992.3421052632  
23,1,17346.375  
23,1,5986.3697916665  
23,1,10226.3187500001  
23,1,5494.9302325581  
23,1,12153.3255813952  
23,1,6860.4390243903  
23,1,7579.8958333334  
23,1,12486.2570754717  
23,1,9605.528846154  
23,1,5586.1726190478  
23,1,6636.3723404256  
23,1,11698.9330357143  
23,1,8497.275  
23,1,8437.8958333333  
23,1,5550.3233695653  
23,1,6172.6481481481  
23,1,5530.1785714286  
23,1,5395.125  
23,1,6153.0096153847  
23,1,8308.5178571428  
23,1,5305.2239583334  
23,1,5663.5777777779  
23,1,10573.3068181817  
23,1,5085.5000000001  
23,1,7049.3011363636  
23,1,11150.1079545454  
23,1,8304.357142857  
23,1,11171.8125000001  
23,1,5766.1281249999  
23,1,11719.4456521741  
23,1,7490.0760869565  
23,1,9684.7395833332  
23,1,9963.5333333333  
23,1,7053.7831632654  
23,1,7659.9763513513  
23,1,10468.2291666668  
23,1,14141.9117647062  
23,1,12703.1315789472  
23,1,6212.375  
23,1,19650.3275862071  
23,1,7690.2155172413  
23,1,7152.8097826087  
23,1,16522  
23,1,9204.1626506025  
23,1,5961.75  
23,1,6126.7289719625  
23,1,12021.7031250001  
23,1,5729.0500000001  
23,1,14067.0170454543  
23,1,12033.1718749997  
23,1,5322.9438775511  
23,1,7769.3292682926  
23,1,6274.8999999999

23,1,5495.6923076923  
23,1,7793.9802631579  
23,1,19887.9189189188  
23,1,7159.5882352942  
23,1,5453.195754717  
23,1,5762.5322580646  
23,1,17354.625  
23,1,6187.6428571429  
24,2,6747.5994318183  
24,2,6591.0033783783  
24,2,6432.8125  
24,2,5807.8461538463  
24,2,9111.0227272727  
24,2,5358.9361702128  
24,2,6089.1505681819  
24,2,5266.6875  
24,2,5999.9047619047  
24,2,5034.8014705882  
24,2,9955.3932291667  
24,2,11542.25  
24,2,8348.3016304348  
24,2,6356.8656249999  
24,2,9180.8235294118  
24,2,5430.6933962264  
24,2,7776.8869047619  
24,2,8193.1538461538  
24,2,6292.4285714285  
24,2,5013.625  
24,2,6675.6599999999  
24,2,6148.2678571429  
24,2,7195.3125  
24,2,6810.2826086957  
24,2,6016.8250000001  
24,2,5919.3079268293  
24,2,8904.6642857143  
24,2,5409.0640243902  
24,2,5232.2239583334  
24,2,9385.5299999999  
24,2,10111.4749999999  
24,2,6596.4030612245  
24,2,8989.2977941176  
24,2,8012.1354166668  
24,2,6410.5272727273  
24,2,5536.765625  
24,2,7669.1987179488  
24,2,5849.2075471698  
24,2,7258.8953488372  
24,2,8615.3913043478  
24,2,5149.85  
24,2,5422.5000000001  
24,2,7979.8833333331  
24,2,7653.3478260869  
24,2,6542.1486486488  
24,2,6079.5961538463  
24,2,9391.5357142857  
24,2,5882.6176470588  
24,2,6580.3563829787  
24,2,10113.7645348837  
24,2,5883.2413793104  
24,2,5131.9838709677  
24,2,5760.25  
24,2,8567.6732954547  
24,2,5050.0670731708  
24,2,7157.9107142857  
24,2,11730.7195121952  
24,2,8152.8461538461

24,2,5125.1999999998  
 24,2,5906.7407407408  
 24,2,6146.5238095238  
 24,2,6525.7378048782  
 24,2,6268.9156626505  
 24,2,6241.587837838  
 24,2,7974.765625  
 24,2,5119.909090909  
 24,2,5544.2151162791  
 24,2,6976.0545454545  
 24,2,6365.5921052632  
 24,2,6367.6428571429  
 24,2,5923.7111111111  
 24,2,10109.2987804879  
 24,2,5997.670212766  
 24,2,5219.3048780488  
 24,2,8141.1619318181  
 24,2,7354.6768292683  
 24,2,6489.0930232558  
 24,2,5528.7022058824  
 24,2,5616.1346153846  
 24,2,9045.9166666668  
 24,2,7606.5535714286  
 24,2,5307.9285714284  
 24,2,6283.8

Table S2 C) Intensity recorded for peptide chimera on MATa and MATalpha cells. MATa recordings correspond with odd Time numbers, and MATalpha with even Time numbers

Time,GroupByColor,Intensity

1,1,18611.1547619048  
 1,1,12613.5  
 1,1,7917.4289215685  
 1,1,5611.2678571428  
 1,1,14934.4754901958  
 1,1,12711.6111111111  
 1,1,12208.3823529411  
 1,1,8625.090425532  
 1,1,5716.8263888889  
 1,1,5926.7739361703  
 1,1,6331.8380681816  
 1,1,6324.5572916667  
 1,1,5820.6  
 1,1,5654.0555555555  
 1,1,6478.6170212767  
 1,1,13772.2697368421  
 1,1,6323.1388888888  
 1,1,9389.4545454546  
 1,1,8660.3181818181  
 1,1,7392.6122448978  
 1,1,5255.8243243244  
 1,1,6181.3511904761  
 1,1,10489.0531249999  
 1,1,16275.4017857144  
 1,1,5099.7336956522  
 1,1,7724.21  
 1,1,12466.7122093022  
 1,1,10975.2687499999  
 1,1,6853.3696808509  
 1,1,9667.2589285714  
 1,1,15936.1413043477  
 1,1,8443.8256578947  
 1,1,9118.3  
 1,1,7168.215909091  
 1,1,6729.6906779662  
 1,1,11840.5364583335  
 1,1,5282.2980769231

1,1,6096.7678571429  
1,1,9829.2307692308  
1,1,6005.6486486488  
1,1,5501.5243902438  
1,1,6324.1249999997  
1,1,7415.2083333333  
1,1,8112.3958333333  
1,1,13041.875  
1,1,9539.3823529412  
1,1,5215.8382352941  
1,1,11958.0163934423  
1,1,16890.0523255818  
1,1,5444.4711538461  
1,1,7024.3125  
1,1,7414.0431034482  
1,1,5439.08125  
1,1,6979.625  
1,1,5398.543478261  
1,1,7798.5540540539  
1,1,19168.4513888888  
1,1,6166.993902439  
1,1,17180.2  
1,1,5731.6585365854  
1,1,10900.5872093024  
1,1,5365.8511904762  
1,1,5038.2965116278  
1,1,13973.9230769232  
1,1,8513.4147727274  
1,1,19968.5232558143  
1,1,16738.036764706  
1,1,5974.8803191488  
1,1,9542.5640243903  
1,1,8931.3882978723  
1,1,6979.4339622642  
1,1,5958.8617021276  
1,1,11715.1904761904  
1,1,9358.384615385  
1,1,7970.3585526314  
1,1,13385.6666666667  
1,1,9589.5738636364  
1,1,5066.8191489362  
1,1,5319.9812499999  
1,1,6159.8541666666  
1,1,7693.7635135135  
1,1,5753.3750000001  
1,1,7200.3829787234  
1,1,11589.3333333332  
1,1,18365.1279069771  
1,1,14701.5499999997  
1,1,14179.1607142857  
1,1,5476.268292683  
1,1,7465.2367021277  
1,1,14768.3783783786  
1,1,5226.3109756097  
1,1,13184.004032258  
1,1,5913.3700000001  
1,1,8324.9545454545  
1,1,11595.9934210529  
1,1,7334.125  
1,1,5513.0978260869  
1,1,19216.5197368421  
1,1,11301.127777778  
1,1,11933.1052631578  
1,1,6957.34375  
1,1,7520.9390243903  
1,1,18251.9889705882

1,1,5697.0290697676  
1,1,9632.2583333335  
1,1,5363.2068965518  
1,1,14847.7027777777  
1,1,14877.6249999999  
1,1,7765.2040816326  
1,1,5730.75  
1,1,6600.6193181818  
1,1,8951.3836206897  
1,1,8512.84765625  
1,1,6390.2857142857  
1,1,18848.8981481482  
1,1,12980.2968749999  
1,1,7964.4625  
1,1,5674.7272727272  
1,1,8291  
1,1,19841.55  
1,1,6030.39375  
1,1,11698.03  
1,1,5357.8445121951  
1,1,7567.5312499999  
1,1,5587.1768292683  
1,1,10522.9411764706  
1,1,10888.3509615384  
1,1,8730.6538461539  
1,1,15818.7209302325  
1,1,5558.2207446809  
1,1,14022.0625000002  
1,1,19083.9767441861  
1,1,6010.2062499999  
1,1,19193.0388888889  
1,1,14060.6413043478  
1,1,6067.5869565218  
1,1,6884.5111111111  
1,1,12707.8499999999  
1,1,5564.5694444445  
1,1,12011.3716216216  
1,1,8725.5625  
1,1,15462.2727272726  
1,1,6907.816037736  
1,1,6965.6013513514  
1,1,6436.2573529411  
1,1,19179.3055555556  
1,1,12904.6477272728  
1,1,6416.1063829788  
1,1,10675.0238095237  
1,1,18626.9999999998  
1,1,5246.3522727272  
1,1,9440.4107142858  
1,1,7692.7674418604  
1,1,8872.2926136362  
1,1,8181.0673076924  
1,1,13034.4999999999  
1,1,9182.8720238095  
1,1,8377.3451086956  
1,1,5449.9714285716  
1,1,8548.147260274  
1,1,5097.6694444445  
1,1,13473.278846154  
1,1,6049.5182926827  
1,1,6969.6428571428  
1,1,7485.5575000001  
1,1,15668.5117924525  
1,1,11919.358108108  
1,1,10051.453125  
1,1,9189.9534883721

1,1,5253.2738095238  
1,1,15103.1276595744  
1,1,13558.4926470589  
1,1,8551.5625  
1,1,18208.3048780488  
1,1,8989.3799999997  
1,1,8591.2374999999  
1,1,5901.3775510203  
1,1,11120.5069444442  
1,1,8899.6470588235  
1,1,14065.4663461539  
1,1,16640.8140243903  
1,1,5866.9182692307  
1,1,11061.7321428577  
1,1,7332.4772727272  
1,1,17197.4605263155  
1,1,5578.9725  
1,1,5974.6358695653  
1,1,7506.7169811321  
1,1,13426.3164556962  
1,1,11590.4302325582  
1,1,7852.2884615385  
1,1,13896.1363636365  
1,1,14292.2692307693  
1,1,8234.5401785716  
1,1,5303.2234042553  
1,1,9235.892857143  
1,1,7098.4711538461  
1,1,10576.5285714287  
1,1,7465.1714285714  
1,1,17288.5217391307  
1,1,5137.2916666667  
1,1,6341.5542168675  
1,1,13555.1348684214  
1,1,16017.6521739131  
1,1,12929.08  
1,1,5230.5000000002  
1,1,18086.5729166673  
1,1,5601.9829545455  
1,1,10716.5624999997  
2,2,7383  
2,2,5415.2249999999  
2,2,6193.784375  
2,2,7351.9836956521  
2,2,5726.8310810811  
2,2,7691.1624999999  
2,2,7323.6378205128  
2,2,6875.7799999999  
2,2,6334.9673913043  
2,2,7201.0000000003  
2,2,8193.0681818182  
2,2,7526.0135135135  
2,2,7662.0892857144  
2,2,6513.2558139535  
2,2,8318.4476744186  
2,2,9634.9811320755  
2,2,5502.0833333333  
2,2,6500.3313953489  
2,2,6145.5113636364  
2,2,6669.4357142856  
2,2,5369.6222222223  
2,2,8273.8125  
2,2,5243.3170731707  
2,2,8274.5853658537  
2,2,5123.9085365854  
2,2,8932.8107142858

2,2,6370.2608695652  
2,2,5305.2250000001  
2,2,6367.0743243243  
2,2,10597.4053030304  
2,2,8838.5816326533  
2,2,6497.5625  
2,2,5961.6511627907  
2,2,8080.9930555556  
2,2,5003.7434210525  
2,2,11579.2466216217  
2,2,5318.0737179487  
2,2,6009.9632352942  
2,2,5927.7826086956  
2,2,6675.5597826085  
2,2,7747.4883720931  
2,2,7321.9787234042  
2,2,7191.7591463415  
2,2,5644.7993421053  
2,2,7925.3267045455  
2,2,6354.3958333334  
2,2,7642.4719387756  
2,2,7912.4722222223  
2,2,6148.5937500002  
2,2,8397.2608695651  
2,2,6184.15234375  
2,2,8804.9560810811  
2,2,7554.0000000001  
2,2,5220.6395348837  
2,2,9317.3009259259  
2,2,6553.4044117646  
2,2,5589.3048780487  
2,2,5493.3152173912  
2,2,5648.9331395351  
2,2,5000.7016129033  
2,2,7386.7  
2,2,7387.5340909091  
2,2,6539.7209302325  
2,2,6394.5625  
2,2,8109.9119318181  
2,2,9698.7847222223  
2,2,9256  
2,2,6615.3  
2,2,6749.8541666666  
2,2,5462.6785714285  
2,2,5469.9999999999  
2,2,5159  
2,2,6114.9281914894  
2,2,6350.0052083331  
2,2,7407.9558823529  
2,2,6111.1275510204  
2,2,6758.1999999999  
2,2,7378.4387254902  
2,2,7073.1029411765  
2,2,6082.4499999999  
2,2,5713  
2,2,5412.1785714286  
2,2,6657.2023809523  
2,2,8583.2500000001  
2,2,5046.6216216215  
2,2,6544.8404255319  
2,2,6085.6888888888  
2,2,8234.7972972973  
2,2,9292.987804878  
2,2,7487.1011904762  
2,2,5647.8221153846  
2,2,6635.765625

2,2,6859.7045454546  
2,2,5541.7916666666  
2,2,5067.4519230769  
2,2,5236.75  
2,2,5227.8484848485  
2,2,8955.284090909  
2,2,8534.9593749999  
2,2,5082.9  
2,2,6771.8024193547  
2,2,7590.9035714286  
2,2,5729.24  
2,2,8075.8011363636  
2,2,5612.2604166667  
2,2,6342.8416666667  
2,2,5019.1220238095  
2,2,5440.831521739  
2,2,6872.2738095238  
2,2,7144.4042553192  
2,2,6340.3125  
2,2,6046.8958333333  
2,2,5756.4375  
2,2,6427.2162162163  
3,1,5825.6493902437  
3,1,7239.9000000002  
3,1,16140.5  
3,1,5770.3375  
3,1,5068.7325581395  
3,1,7045.1555555556  
3,1,8779.5977653632  
3,1,6217  
3,1,13406.3714285715  
3,1,8071.2836538462  
3,1,15095.2999999997  
3,1,5887.4772727272  
4,2,6796.8333333334  
4,2,5095.8443396226  
4,2,6283.4375  
4,2,7713.8571428572  
4,2,7641.9078947368  
4,2,7021.4802631576  
4,2,7909.2195121952  
4,2,7774.4886363637  
4,2,12650.5064102564  
4,2,6372.3333333333  
4,2,7751.3333333334  
4,2,5284.8372093023  
4,2,6635.3482758621  
4,2,5189.9736842105  
4,2,6874.7729591838  
5,1,14447.9285714286  
5,1,5277.2796052631  
5,1,12577.1923076925  
5,1,5463.45  
5,1,7255.011627907  
5,1,9746.3846153846  
5,1,5131.6516393443  
5,1,6088.3605769232  
5,1,7067.3721590909  
5,1,16153.5897435898  
5,1,8216.1395348838  
5,1,9191.7142857143  
5,1,14690.9414893619  
5,1,10386.1032608695  
5,1,10202.9732142858  
5,1,9509.7838541667  
5,1,6896.0131578947

5,1,6923.2000000001  
5,1,7278.0589622643  
5,1,6911.4013157895  
5,1,6978.8620689654  
5,1,18651.6999999999  
5,1,11378.542763158  
5,1,10318  
5,1,6360.8139534883  
5,1,5112.5384615385  
5,1,18944.605263159  
5,1,7342.0197368422  
5,1,5566.4722222223  
5,1,11799.3650000001  
5,1,8796.5223214284  
5,1,5641.8416666666  
5,1,5440.7349999999  
5,1,5597.8577586207  
5,1,6663.41875  
5,1,6438.1666666667  
5,1,5917  
5,1,5524.0668604651  
5,1,13873.8442622951  
5,1,10965.6088709678  
5,1,5086.931372549  
5,1,5890.6385135137  
5,1,9883.9000000001  
5,1,7514.9100000001  
5,1,5344.6796875  
5,1,10327  
5,1,8610.2343749999  
5,1,7491.0833333333  
5,1,7755.8869047616  
5,1,6638.3154761905  
5,1,8040.6494565217  
5,1,5846.7291666667  
5,1,11721.6521739132  
5,1,6443.3058510637  
5,1,8262.8658536586  
5,1,6872.8494318182  
5,1,11501.7277777776  
5,1,14279.5500000001  
5,1,6158.17  
5,1,16205.052777778  
5,1,17157.1874999994  
5,1,18807.2861111117  
5,1,7736.871527778  
5,1,6378.5000000001  
5,1,6372.7307692308  
5,1,14331.638888889  
5,1,5876.661764706  
5,1,5615.9926470588  
5,1,6054.15  
5,1,10026.4444444444  
5,1,11385.9534883722  
5,1,6647.6744791666  
5,1,5367.2053571431  
5,1,12316.0625  
5,1,6178.7211538462  
5,1,9430.0701219511  
5,1,6593.7202380952  
5,1,7702.0188679245  
5,1,5804.6170212766  
5,1,5703.5945945946  
5,1,7510.546875  
5,1,6323.8181818182  
5,1,5104.4659090909

5,1,9688.4910714285  
5,1,14410.9062500003  
5,1,6481.3297872341  
5,1,17302.9868421049  
5,1,5007.8697916666  
5,1,14303  
5,1,5296.8443396226  
5,1,7487.0833333332  
5,1,14230.6576086955  
5,1,5085.4880952381  
5,1,9364.3482142857  
5,1,7269.25  
5,1,16300.5625000003  
5,1,6477.035  
5,1,12715.9375  
5,1,11559.7375  
5,1,7925.2631578947  
5,1,5985.666666667  
5,1,8596.4999999998  
5,1,5317.5  
5,1,8367.5416666667  
5,1,5128.8461538462  
5,1,5456.46875  
5,1,5595.365131579  
5,1,8826.84375  
5,1,7058.0416666667  
5,1,5866.3553921567  
5,1,5632.8897058822  
5,1,12673.6521739131  
5,1,6770.1710526315  
5,1,13233.9812499995  
5,1,12230.2232142858  
5,1,5752.6666666668  
5,1,5242.3072916666  
5,1,5511.5235849056  
5,1,5700.9176136365  
5,1,14029.6335227272  
5,1,11585.9642857143  
5,1,10529.6666666667  
5,1,7965.0813953489  
5,1,5800.0833333335  
5,1,5919.5652173914  
5,1,7202.375  
5,1,8635.267857143  
5,1,7736.4187499998  
5,1,10041.8678571426  
5,1,5802.9910714286  
5,1,5102.6820652173  
5,1,8667.371875  
5,1,12203.22265625  
5,1,8729.9264705883  
5,1,16662.8541666667  
5,1,5676.1689189188  
5,1,6163.5131578947  
5,1,11627.0187499999  
5,1,11521.130952381  
5,1,5634.131097561  
5,1,8032.9019607844  
5,1,18850.8624999998  
5,1,12552.6119791669  
5,1,6649.8452380953  
5,1,6078.5555555557  
5,1,9013.7835365854  
5,1,7697.7790697674  
5,1,6245.375  
5,1,9199.4359756098

5,1,5973.0178571429  
5,1,14346.8510638295  
5,1,6147.4871794872  
5,1,9088.15625  
5,1,8955.0054347831  
5,1,19635.6953125  
5,1,7589.3284883722  
5,1,6871.9071428572  
5,1,5902.7432432432  
5,1,5540.2865853658  
5,1,6374.8802083335  
5,1,11537.401960784  
5,1,5955.6547619048  
5,1,9902.0568181819  
5,1,6369.5  
5,1,7208.5  
5,1,5394.875  
5,1,5942.3375  
5,1,5453.4871794872  
5,1,5501.2872340426  
5,1,14427.4891304346  
5,1,8751.235576923  
5,1,7769.7179487179  
5,1,11998.5166666666  
5,1,7513.9847560976  
5,1,5140.9222972973  
5,1,6455.0178571428  
5,1,12851.2962962961  
5,1,10100.3984374999  
5,1,8920.2727272728  
5,1,14500.0813953489  
5,1,14745.75  
5,1,8231.875  
5,1,5654.8676470588  
5,1,5853.3233532934  
5,1,18054.9722222223  
5,1,7459.3645833334  
5,1,13847.456140351  
5,1,7097.3333333335  
5,1,6752.2828947368  
5,1,9413.0714285713  
5,1,8248.375  
5,1,14355.2965686279  
5,1,9869.28125  
5,1,6424.9107142856  
5,1,5101.375  
5,1,6999.3365384615  
5,1,13885.6666666666  
5,1,11642.9479166667  
5,1,7016.8372093023  
5,1,6099.3319327731  
5,1,14275.3076923079  
5,1,14005.5882352941  
5,1,9992.9333333336  
5,1,17042  
5,1,18297.1874999994  
5,1,14482.149390244  
5,1,5697.9878048781  
5,1,17581.9562499996  
5,1,12027.51953125  
5,1,5047.9375  
5,1,9377.0874999998  
5,1,7176.0561224489  
5,1,6114.4  
5,1,5015.890625  
5,1,6809.4705882352

5,1,12816.0790816326  
5,1,18224.4519230768  
5,1,5609.1046511628  
5,1,12226.0795454544  
5,1,10612.9074074075  
6,2,6375.2134146342  
6,2,7341.3615384615  
6,2,8842.3012820512  
6,2,7937.3999999999  
6,2,12872.4090909087  
6,2,11537.9281914894  
6,2,16595.9166666667  
6,2,7360.505319149  
6,2,7224.625  
6,2,10171.8928571428  
6,2,6187.2105263157  
6,2,5625.0487804878  
6,2,11973.6482558142  
6,2,5705.5156250001  
6,2,7240.4861111111  
6,2,5389.53125  
6,2,5148.5543478261  
6,2,8492  
6,2,6058.2166666667  
6,2,7323.872881356  
6,2,6756.6  
6,2,6703.2635135135  
6,2,6154.7000000002  
6,2,6656.1279069768  
6,2,7255.3190789474  
6,2,5035.5921052633  
6,2,6193.9772727272  
6,2,9259.4222972973  
6,2,5658.8669354838  
6,2,8942.25  
6,2,7373.1500000001  
6,2,12072.4117647059  
6,2,9118.9347826087  
6,2,7450.1114130434  
6,2,6814.4732142858  
6,2,7460.3387096774  
6,2,6393.5  
6,2,8241.972972973  
6,2,5379.1737804879  
6,2,9961.3437500001  
6,2,5311.6536885247  
6,2,5725.3989361703  
6,2,5271.2848837209  
6,2,6549.9857142858  
6,2,9207.5848214287  
6,2,8635.5  
6,2,5656.2987804877  
6,2,10852.0975609757  
6,2,5650.3994565218  
6,2,5202.8310810811  
6,2,8190.1219512195  
6,2,7740.3653846153  
6,2,5806.7708333334  
6,2,6071.0548780487  
6,2,5611.8092105264  
6,2,6042.8722826088  
6,2,5517.4127906978  
6,2,8435.9090909091  
6,2,7579.618902439  
6,2,6838.1444444444  
6,2,7905.9298780487

6,2,6000.9464285715  
6,2,6363.0151515151  
6,2,6959.4166666668  
6,2,5914.7142857141  
6,2,5913.538888889  
6,2,6365.7072368421  
6,2,7269.7718749999  
6,2,5395.5306122449  
6,2,5741.3284883721  
6,2,8403.3970588237  
6,2,5604.6452702703  
6,2,9320.222826087  
6,2,5325.3074324324  
6,2,8946.6071428575  
6,2,8924.5131578947  
6,2,7202.0625000002  
6,2,10544.972222222  
6,2,5881.3877551021  
6,2,9785.7857142858  
6,2,6610.7010869564  
6,2,7045.1071428571  
6,2,8486.541984733  
6,2,5156.5220588236  
6,2,7144.6666666667  
6,2,7513.2857142858  
6,2,7735.8571428572  
6,2,7498.8237179488  
6,2,10949.65  
6,2,5113.4444444444  
6,2,6116.8888888888  
6,2,7971.1968085105  
6,2,14224.2962962963  
6,2,5695.5472222222  
6,2,5140.2272727272  
6,2,9477.0548780488  
6,2,7337.0249999999  
6,2,6133.5965909091  
6,2,5247.3628048781  
6,2,6630.898255814  
6,2,6311.25  
6,2,5083.5102040813  
6,2,10912.1858108108  
6,2,6786.7368421051  
6,2,10315.722826087  
7,1,15918.71875  
7,1,6778.4  
7,1,9865.5588235296  
7,1,5864.75  
7,1,5217.2857142859  
7,1,19814.7142857141  
7,1,5313.3986486486  
7,1,8924.4230769231  
7,1,5353.3658536585  
7,1,12537.1428571428  
7,1,11779.8629032259  
7,1,5159.5930851065  
7,1,7970.35  
7,1,10507.7093749999  
7,1,7174.1875  
7,1,18577.4702380953  
7,1,5017.1707317073  
7,1,8459.4358974359  
7,1,8619.6428571431  
7,1,13459.2596153844  
7,1,18206.8942307692  
7,1,9759.921875

7,1,13053.2649999995  
7,1,17266.4444444445  
7,1,17752.4285714288  
7,1,17724.5166666667  
7,1,6965.0468750001  
7,1,7528.3878205127  
7,1,6649.9345238096  
7,1,5592.1890243901  
7,1,5697.4730392157  
7,1,7665.0408163264  
7,1,6926.5539772726  
7,1,5477.6857142858  
7,1,9525.8611111112  
7,1,10072.5520833334  
7,1,11724.6911764705  
7,1,11320.7564102562  
7,1,12486.6388888885  
7,1,5331.4097222221  
7,1,6437.5524193548  
7,1,12585.6363636363  
7,1,12032.9906250001  
7,1,19230.0231481482  
7,1,8733.2806603775  
7,1,5072.4593023256  
7,1,7144.2549019607  
7,1,12324.7449999999  
7,1,7758.2391304348  
7,1,8969.5738636363  
7,1,11729.9779411764  
7,1,18049.1646341462  
7,1,15907.5609756097  
7,1,10861.6250000003  
7,1,7055.9673913043  
7,1,8324.3658536586  
7,1,5483.962962963  
7,1,15950.5625  
7,1,6160.6682692309  
7,1,9067.7562499999  
7,1,12006.0568181818  
7,1,5189.1874999999  
7,1,6807.5  
7,1,7084.9705882352  
7,1,13000  
7,1,16353.5480769233  
7,1,18957.6838235295  
7,1,9302.3244047619  
7,1,7979.5337837839  
7,1,6360.5999999998  
7,1,8862.1333333334  
7,1,16275.9605263158  
7,1,18263.9310344828  
7,1,7184.9662162163  
7,1,7266.8578431372  
7,1,13319.7331081081  
7,1,5730.6902173912  
7,1,11159.8081395347  
7,1,5316.1222222221  
7,1,17016.5  
7,1,5882.0265957447  
7,1,9645.6890243902  
7,1,17402.5943396224  
7,1,8656.9389534884  
7,1,6281.4006410258  
7,1,6960.55  
7,1,19195.4423076927  
7,1,15905.0625

7,1,5574.9047619047  
7,1,12963.5270270271  
7,1,5150.3  
7,1,10569.0075757576  
7,1,13136.7403846155  
7,1,8700.8937500001  
7,1,8425  
7,1,14473.5789473685  
7,1,14970.9879032259  
7,1,8483.5972222223  
7,1,8083.8430232559  
7,1,5478.8717948718  
7,1,7025.5526315791  
7,1,12007.9347826087  
7,1,10167.2819148935  
7,1,10902.9239130432  
7,1,5798.3815789474  
7,1,6300.7440476191  
7,1,16917.55625  
7,1,19258.2708333336  
7,1,6391.3295454545  
7,1,13484.2580645161  
7,1,8083.6  
7,1,15846.8457446814  
7,1,5044.428125  
7,1,5173.7809523809  
7,1,7255.6698113209  
7,1,8330.8090277777  
7,1,12507.0851063833  
7,1,13139.4999999999  
7,1,7144.2916666667  
7,1,19346.9310344827  
7,1,9281.8837719296  
7,1,8115.3833333334  
7,1,10127.3750000002  
7,1,10445.6315789473  
7,1,11632.1540697675  
7,1,5232.6666666666  
7,1,9398.4090909092  
7,1,5991.375  
7,1,5474.4798387097  
7,1,6851.7949999999  
7,1,6347.4250000001  
7,1,5007.3170731707  
7,1,6737.2892156862  
7,1,7159.4542682927  
7,1,5786.0666666667  
7,1,5324.8783783783  
7,1,6838.6463414636  
7,1,5113.6  
7,1,8597.9207317073  
7,1,6947.875  
7,1,7153.1785714288  
7,1,13822.6845238092  
7,1,6588.8779069768  
7,1,14942.3191489362  
7,1,5603.4523809523  
7,1,6041.1627906978  
7,1,19590.879464286  
7,1,9209.2  
7,1,9930.7613636365  
7,1,19973.8648648646  
7,1,5750.9404761904  
7,1,14630.4715909093  
7,1,13390.60546875  
7,1,6374.1971428571

7,1,18501.4308510639  
7,1,6125.6187500001  
7,1,11292.5972222221  
7,1,10275.1947674418  
7,1,5967.7946428571  
7,1,6389.9013157896  
7,1,7305.9671052631  
7,1,13021.511904762  
7,1,9749.6521739134  
7,1,5419.5666666666  
7,1,15720.3928571428  
7,1,15174.90625  
7,1,5117.8522727274  
7,1,11716.1833333334  
7,1,13466.9361111113  
7,1,9376.4999999999  
7,1,7952.5853658537  
7,1,17631.6052631578  
7,1,10104.8676470587  
7,1,5841.8837209302  
7,1,5183.3166666667  
7,1,12110.4166666666  
7,1,5854.875  
7,1,10770.25  
7,1,16495.7774390243  
7,1,11566  
7,1,8134.0571428571  
7,1,14715.0478723405  
7,1,12895.6321428572  
7,1,7592.9166666666  
7,1,7725.8333333332  
7,1,5034.1666666665  
7,1,6862.2019230771  
7,1,10848.6644736842  
7,1,5910.612244898  
7,1,6997.779255319  
7,1,10503.1829268295  
7,1,19772.5563725478  
7,1,5927.8776595745  
7,1,5402.1843750002  
7,1,9718.2702702703  
7,1,13269.8388157894  
7,1,5538.3125  
8,2,7505.2173913044  
8,2,5148.0833333333  
8,2,6445.03125  
8,2,5405.0399999998  
8,2,8230.6975806451  
8,2,5053.1750000001  
8,2,5728.125  
8,2,5231.7325581396  
8,2,6498.3953488373  
8,2,5820.9999999999  
8,2,6426.9081632653  
8,2,7188.0930232559  
8,2,5050.2763157894  
8,2,6232.8437499999  
8,2,5619.7142857143  
8,2,6153.9878048781  
8,2,6954.7906976744  
8,2,5419.3461538462  
8,2,9380.9802631582  
8,2,6542.0663265307  
8,2,5994.4799107144  
8,2,5538.295  
8,2,9453.1655405406

8,2,8897.4  
8,2,6794.3177083336  
8,2,5436.0465116279  
8,2,8428.1500000001  
8,2,7990.1442307693  
8,2,7020.1505102041  
8,2,7622.7286585365  
8,2,5627.8970588235  
8,2,7688.8515625  
8,2,7116.9999999999  
8,2,6073.3813559322  
8,2,6506.3292682927  
8,2,7702.2931818182  
8,2,5410.409090909  
8,2,5390.1785714285  
8,2,9414.7781249997  
8,2,5538.6904761905  
8,2,9289.0130208333  
8,2,5774.6344339622  
8,2,9718.0592105263  
8,2,6745.25  
8,2,5172.1995614036  
8,2,5535.7307692308  
8,2,5196.887195122  
8,2,14093.029891304  
8,2,12364.653846154  
8,2,8286.5849056603  
8,2,8608.1380208333  
8,2,6854.4158163266  
8,2,5279.8055555555  
8,2,6655.6666666667  
8,2,7071.8676470588  
8,2,5147.1428571429  
8,2,9457.5875  
8,2,5912.2959183674  
8,2,6376.9070512821  
8,2,5651.1277173913  
8,2,5537.78125  
8,2,6895.137755102  
8,2,5250.4107142858  
8,2,6275.7282608695  
8,2,9188.9475000003  
8,2,6555  
8,2,6945.0975609756  
8,2,7791.085106383  
8,2,5164  
8,2,7683.1323529413  
8,2,5195.9999999999  
8,2,5208.3693181817  
8,2,7162.2124999999  
8,2,5758.5978260868  
8,2,5154.1607142857  
8,2,10866.3000000001  
8,2,5741.8541666667  
8,2,8481.3704545455  
8,2,8204.909090909  
8,2,7313.0625  
8,2,6461.8636363637  
8,2,5202.1739130435  
8,2,5544  
8,2,8227.5813953489  
8,2,8144.8333333333  
8,2,7009.6250000001  
8,2,8177.5773809524  
8,2,6090.3823529412  
8,2,6052.6282894737

8,2,10655.9309210526  
8,2,5865.6162790698  
8,2,5278  
8,2,6004.2162162163  
8,2,8038.5739795917  
8,2,11758.0972222224  
8,2,9647.3999999999  
8,2,8651.8190789473  
8,2,12938.9268292683  
8,2,5935.25  
8,2,7860.0869565216  
8,2,5266.828125  
8,2,5744.0795454546  
8,2,5297.20703125  
8,2,9358.0000000001  
8,2,9459.8148148152  
8,2,6751.8493589744  
8,2,6414.6818181819  
8,2,5554.765  
8,2,6936.972972973  
8,2,6770.3885135135  
8,2,6151.5855263158  
8,2,7012  
8,2,12165.4411764706  
8,2,5162.2195121951  
8,2,7154.7216981133  
8,2,8272.3409090909  
8,2,6523.018292683  
8,2,5151.5067567568  
9,1,17640.5859375  
9,1,9015.5000000001  
9,1,12037.375  
9,1,12953.3841463414  
9,1,10470.5121951217  
9,1,10296.1761363638  
9,1,10224.715425532  
9,1,7133.375  
9,1,6375.4878048782  
9,1,5714.9040697675  
9,1,16174.5760869567  
9,1,7276.5994318182  
9,1,5866.1162790698  
9,1,5048.2777777777  
9,1,10013.1914893616  
9,1,12781.9521276596  
9,1,7258.13  
9,1,7397.2678571429  
9,1,5062.9797297297  
9,1,6076.3365384616  
9,1,11722.5  
9,1,17542.7616279069  
9,1,15860.6959459459  
9,1,11294.1538461539  
9,1,8416.3450704224  
9,1,9360.1923076923  
9,1,16173.8947368422  
9,1,5141.0851063831  
9,1,16332.821875  
9,1,13867.5  
9,1,7302.8536585366  
9,1,16843.1900000003  
9,1,11732.4967948719  
9,1,13632.8177966098  
9,1,7432.7761627907  
9,1,5520.1630434783  
9,1,16307.2499999997

9,1,11930.2105263157  
9,1,10876.0462962962  
9,1,9737.0408163267  
9,1,8065.8499999999  
9,1,12996.4111842103  
9,1,6729.3750000001  
9,1,13013.1418918919  
9,1,11821.7282608691  
9,1,12759.0588235294  
9,1,19057.96875  
9,1,9802.2250000001  
9,1,7319.2942708334  
9,1,7527.6684782608  
9,1,6608.6176470588  
9,1,5978.7142857144  
9,1,11871.2105263159  
9,1,5593.5  
9,1,10157.7560975612  
9,1,7108.9088541668  
9,1,16789.8269230767  
9,1,14302.3437500002  
9,1,6301.7173913043  
9,1,5539.8457446808  
9,1,7675.5259433961  
9,1,7546.9651162791  
9,1,6887.8139534883  
9,1,12688.8292682924  
9,1,9969.0340909091  
9,1,19844.9333333334  
9,1,5230.7331081081  
9,1,6085.925925926  
9,1,5231.4786585366  
9,1,12309.1308139535  
9,1,14135.5714285715  
9,1,8926.2053571428  
9,1,5188.3396226416  
9,1,6819.2010869565  
9,1,15090.2368421054  
9,1,6628.1798780488  
9,1,13323.226744186  
9,1,5800.0255681818  
9,1,7979.7952127661  
9,1,8230.4662162162  
9,1,5359.5897435897  
9,1,13525.4264705887  
9,1,14072.5357142859  
9,1,14249.1447368419  
9,1,7416.46875  
9,1,8747.84375  
9,1,6894.1802325581  
9,1,13323.1707317071  
9,1,6253.8823529412  
9,1,5343.8902439025  
9,1,6537.8982558139  
9,1,9914.1764705883  
9,1,17636.2499999998  
9,1,5785.4340277778  
9,1,8532.2325581395  
9,1,12386.1223404254  
9,1,7127.2613636362  
9,1,5644.1197916665  
9,1,8685.4883720931  
9,1,8000.0609756096  
9,1,14830.103448276  
9,1,6042.1909722222  
9,1,13732.0407407407

9,1,7988.5476190475  
9,1,10991.9918478256  
9,1,7581.8382352941  
9,1,8144.3475609757  
9,1,6153.9080882352  
9,1,6369.8214285715  
9,1,5734.5625  
9,1,5026.2173913043  
9,1,14978.599264706  
9,1,5264.2916666666  
9,1,6169.4999999999  
9,1,12611.6527777777  
9,1,18159.0384615386  
9,1,9492.7499999999  
9,1,6809.0106382979  
9,1,19745.0738636367  
9,1,9310.412735849  
9,1,9950.3333333334  
9,1,5539.2872340425  
9,1,5259.2840909089  
9,1,17463.954787234  
9,1,5288.7620192306  
9,1,19854.5625  
9,1,10638.5274390245  
9,1,9548.2393617024  
9,1,5336.3725490196  
9,1,6492.5784313726  
9,1,7090.5342741935  
9,1,7802.0722222225  
9,1,7783.4519230768  
9,1,5665.0606060606  
9,1,5111.3421052632  
9,1,5152.1666666666  
9,1,15846.3096590908  
9,1,19889.857142857  
9,1,19105.3695652173  
9,1,6706.215909091  
9,1,5353.6875000001  
9,1,10920.4244186046  
9,1,16514.5053191488  
9,1,5218.9110169492  
9,1,5947.8181818183  
9,1,7866.1781914894  
9,1,14354.769230769  
9,1,13605.7925531916  
9,1,7521.829787234  
9,1,9846.706521739  
9,1,7641.4289772727  
9,1,9700.0833333337  
9,1,8556.3333333336  
9,1,8785.6829268292  
9,1,5176.4613095238  
9,1,5216.203125  
9,1,8169.1111111112  
9,1,6817.75  
9,1,6934.4875000001  
9,1,18506.0645161291  
9,1,14870.9189189188  
9,1,7904.4390243903  
9,1,17497.0110294117  
9,1,8656.2641509432  
9,1,5361.0714285714  
9,1,5245.8445121951  
9,1,18346.4000000004  
9,1,13540.4702380956  
9,1,17233.29296875

9,1,11224.1428571426  
9,1,6767.5959821427  
9,1,11678.3235294118  
9,1,7069.9069148938  
9,1,13671.9560810808  
9,1,9307.3939393939  
9,1,5358.1521739131  
9,1,9288.4375  
9,1,6195.1004901961  
9,1,10304.2410714288  
9,1,5600.4969512196  
9,1,8096.2500000002  
9,1,8330.657142857  
9,1,9844.60546875  
9,1,13327.3829787236  
9,1,19946.2780612248  
9,1,5900.3  
9,1,9774.6451612903  
9,1,14363.5375  
9,1,5436.4627659574  
9,1,11632.5263157892  
9,1,8714.6168478263  
9,1,11908.3499999999  
9,1,5263.6702127659  
9,1,16863.7750000001  
9,1,8055.2357142857  
9,1,6435.6037234041  
9,1,13615.84375  
9,1,9921.4945652174  
9,1,13768.1796874999  
9,1,6251.0203488371  
9,1,6331.6075581395  
9,1,8776.8111111111  
9,1,10350.0994318184  
9,1,8353  
9,1,8953.8571428574  
9,1,14248.1209677418  
9,1,5462.2307692307  
9,1,13453.2051282049  
9,1,8090.2670454545  
9,1,6348.1158536585  
9,1,7471.6086956521  
9,1,19077.9849999998  
9,1,7929.11875  
9,1,9286.6889534883  
9,1,6634.5  
9,1,14743.0363636364  
9,1,6088.7619047618  
9,1,7823.6104651163  
9,1,7605.25  
9,1,8521.37  
9,1,18209.1944444444  
9,1,12234.9627659573  
9,1,15463.8858695651  
9,1,6670.5244565218  
10,2,5297.5483870968  
10,2,5292.9680851064  
10,2,9510.7717391304  
10,2,6134.125  
10,2,5222.4871794872  
10,2,11591.2999999998  
10,2,5823.375  
10,2,5691.1174242425  
10,2,5721.0338983051  
10,2,5934  
10,2,7608.7250000001

10,2,5307.6931818182  
10,2,7072.8722222222  
10,2,5010.5707547171  
10,2,5593.1809210526  
10,2,6098.7592592593  
10,2,5881.2887931035  
10,2,11519.465116279  
10,2,5002.0434782609  
10,2,5181.6000000002  
10,2,7959.1  
10,2,5719.5480769231  
10,2,5403.8006756757  
10,2,5789.075  
10,2,5053.5789473685  
10,2,6841.5182926829  
10,2,7353.0724999999  
10,2,8723.5849056604  
10,2,11465.1940789473  
10,2,5314.2238372093  
10,2,7024.3750000001  
10,2,7198.0877659574  
10,2,6245.5239361703  
10,2,6774.5116279069  
10,2,6885.2877906977  
10,2,5674.0377358491  
10,2,5064.0243902439  
10,2,7597.921875  
10,2,5041.1973684211  
10,2,7247.2275641025  
10,2,5861.7727272727  
10,2,7435.0525000002  
10,2,9883.0714285715  
10,2,5656.7500000002  
10,2,7264.0454545454  
10,2,9804.5694444446  
10,2,6789.1743421053  
10,2,6220.5551470588  
10,2,5352.5217391304  
10,2,10061.9055555558  
10,2,7791  
10,2,6228.1886792452  
10,2,6935.7142857144  
10,2,6012.5  
10,2,10930.9642857142  
10,2,5522.7337278106  
10,2,9277.3541666667  
10,2,5056.8534482759  
10,2,5013.5  
10,2,11101.8  
10,2,5980.7261904761  
10,2,5838.4361702127  
10,2,8696.4338235294  
10,2,7350.5256410256  
10,2,5172.73  
10,2,5012.0030487806  
10,2,5419.6280487805  
10,2,7177.0437500002  
10,2,5427.9895833333  
10,2,5867.3421052633  
10,2,5346.8472222222  
10,2,5204.7916666667  
10,2,7973.4166666666  
10,2,5138.6875  
10,2,8169.15  
10,2,10554.9555555559  
10,2,7866.2648809526

10,2,5278.6190476191  
10,2,8887.5833333334  
10,2,6658.9226190476  
10,2,5597.2678571429  
10,2,5539.6964285714  
10,2,8754.7446808511  
10,2,12360.0576923073  
10,2,5090.8333333334  
10,2,7068.9011627905  
10,2,5784.0833333331  
10,2,6040.8947368421  
10,2,5017.7307692308  
10,2,6839.0857142857  
10,2,5191.0443548387  
10,2,7218.4444444444  
10,2,9181.2976190476  
10,2,13037.2205882355  
10,2,5229.8677884615  
10,2,5524.693181818  
10,2,5768.9553072625  
10,2,7875.465116279  
10,2,6354.84375  
10,2,6993.2321428571  
10,2,6396.1202830189  
10,2,9895.4264705884  
10,2,7073.9795918366  
10,2,5517.483974359  
10,2,7385.0705128206  
10,2,8171.3414634146  
10,2,6432.4184782609  
10,2,5935.5408163265  
10,2,9689.3005952381  
10,2,11249.5737179488  
10,2,5646.0357142857  
10,2,10762.0047169811  
10,2,10359.2625000001  
10,2,7409.4796511627  
10,2,6240.6781914894  
10,2,9888.0681818183  
10,2,6722.8684210527  
10,2,9848.8372093024  
10,2,5917.8263888888  
10,2,6021.1802325583  
10,2,7876.6249999999  
10,2,6355.6785714286  
10,2,5331.3670212764  
11,1,10924.6774999998  
11,1,7756.5714285714  
11,1,6076.6363636364  
11,1,9760.9040697676  
11,1,8403.6086956523  
11,1,6002.7941176471  
11,1,9289.2432432433  
11,1,14394.2941176469  
11,1,13519.9166666665  
11,1,11012.9400000001  
11,1,5785.0361842105  
11,1,5998.25  
11,1,5274.8472222223  
11,1,9978.0535714285  
11,1,9706.5813953488  
11,1,5288.265  
11,1,6161.5333333333  
11,1,14609.4883720929  
11,1,19361.322580645  
11,1,5987.6785714285

11,1,6141.6860465117  
11,1,9611.8882978725  
11,1,7513.9437500001  
11,1,9020.1  
11,1,17739.1875000001  
11,1,5731.268292683  
11,1,9906.081632653  
11,1,7748  
11,1,5077.9500000001  
11,1,5959.5546875  
11,1,5679.3482142857  
11,1,6588.8308823529  
11,1,5247.529661017  
11,1,6013.9261363637  
11,1,7250.4972826087  
11,1,11583.4499999999  
11,1,5518.2857142857  
11,1,6137.7142857142  
11,1,5850  
11,1,5232.9999999999  
11,1,5365.6335227272  
11,1,9365.0302419354  
11,1,13722.5034722224  
11,1,13497.6474999999  
11,1,8467.2958333334  
11,1,10543.898305085  
11,1,5308.5  
11,1,7231.3374999999  
11,1,8296.7476851852  
11,1,16881.2317073172  
11,1,6352.201388889  
11,1,7355.8693181818  
11,1,19863.7222222222  
11,1,8175.6016949154  
11,1,14242.6627906977  
11,1,7526.1737804879  
11,1,10724.079787234  
11,1,18297.0416666668  
11,1,13766.5416666669  
11,1,9366.6249999999  
11,1,5725.5478723405  
11,1,5358.8500000001  
11,1,19289.9617346937  
11,1,7884.2765957447  
11,1,12377.3125000002  
11,1,6927.3645833333  
11,1,19069.8359375  
11,1,5862.984375  
11,1,11989.0937500002  
11,1,9172.4893617021  
11,1,5261.6585365854  
11,1,16519.481707317  
11,1,9744.0427631579  
11,1,11097.4390243901  
11,1,5887.4687499999  
11,1,7298.3701923078  
11,1,7185.0480769231  
11,1,5204.0608108108  
11,1,7535.8888888891  
11,1,10894.5892857142  
11,1,5289.9969512195  
11,1,6122.3571428573  
11,1,5804.0546875  
11,1,18220.9664634147  
11,1,5364.4285714286  
11,1,7803.615131579

11,1,5619.2083333334  
11,1,6073.3333333333  
11,1,8946.2594339622  
11,1,5827.7125  
11,1,8454.9166666667  
11,1,7419.3414634146  
11,1,18516.8269230774  
11,1,11582.3958333331  
11,1,5955.8333333333  
11,1,17860.6776315796  
11,1,7817.8190789475  
11,1,18568.8695652172  
11,1,5065.7978723404  
11,1,10184.3  
11,1,6223.7812500001  
11,1,19262.0833333334  
11,1,11407.6463414633  
11,1,7788.6517857144  
11,1,5567.3293269231  
11,1,14720.5789473684  
11,1,6888.982142857  
11,1,15098.7867647059  
11,1,5063.2797619048  
11,1,12908.6676136363  
11,1,11261.7965116278  
11,1,5820.9523809524  
11,1,17183.6889534885  
11,1,9190.5714285715  
11,1,5801.19375  
11,1,17220.512195122  
11,1,10112.3658536585  
11,1,18830.6530612246  
11,1,6986.7960526316  
11,1,5882.0406249999  
11,1,18297.7567567569  
11,1,7175.9791666668  
11,1,7718.205357143  
11,1,9188.4244186046  
11,1,5851.6346153846  
11,1,10433.9487179488  
11,1,7281.0480769231  
11,1,19456.2134146342  
11,1,7129.9322916667  
11,1,5910.8550000001  
11,1,14637.5116279069  
11,1,7039.4204545455  
11,1,7422.2625000001  
11,1,8055.1346153844  
11,1,6182.5477941176  
11,1,6732.9302325579  
11,1,7026.6764705883  
11,1,7498.25  
11,1,5833.671875  
11,1,5966.35  
11,1,5238.6017441862  
11,1,7287.8414634146  
11,1,6404.2596153846  
11,1,12659.0384615385  
11,1,5973.3986486487  
11,1,5871.5535714286  
11,1,8575.1306818182  
11,1,8219.6354166667  
11,1,15379.9230769233  
11,1,16829.1083333333  
11,1,8650.2649999997  
11,1,7353.9999999998

11,1,5487.6282051282  
11,1,18388.5460526313  
11,1,6716.6744186046  
11,1,11488.6875000002  
11,1,6363.4270833333  
11,1,6480.024390244  
11,1,16682.2692307694  
11,1,9528.6515957448  
11,1,7196.2142857145  
11,1,6767.7556818182  
11,1,18163.9695945946  
11,1,5467.8109756098  
11,1,12950.8815789476  
11,1,7693.1462765956  
11,1,15667.6249999997  
11,1,19476.2837837838  
11,1,15017.5735294118  
11,1,13353.6838235293  
11,1,5290.881097561  
11,1,5985.3207547169  
11,1,11606.1187499997  
11,1,9789.7857142859  
11,1,6214.4285714284  
11,1,9780.7249999999  
11,1,5566.6511627907  
11,1,16568.8947368422  
11,1,13258.7819767443  
11,1,18833.4166666667  
11,1,11331.75  
11,1,5148.2127659575  
11,1,6479.8125  
11,1,5107.1520270271  
11,1,13836.02734375  
11,1,19180.6649999997  
11,1,13425.9615384615  
11,1,5691.7333333332  
11,1,9266.1538461539  
11,1,5154.7470238095  
11,1,11264.5514705882  
11,1,10353.595238095  
11,1,5860.1369047619  
11,1,11669.494565217  
11,1,8453.5238095239  
11,1,15225.2898936172  
11,1,8330.5943396226  
11,1,7639.5686274509  
11,1,6281.4920634921  
11,1,12415.3953488373  
11,1,7158.798076923  
11,1,5069.4088541666  
11,1,15690.6666666665  
11,1,9430.8970588236  
11,1,10202.9062499997  
11,1,7603.7625  
11,1,8225.1588541666  
11,1,15529.0280612245  
11,1,14841.8367346936  
11,1,9887.868902439  
11,1,5765.8333333334  
11,1,5885.8171296297  
11,1,5871.8048780488  
11,1,5678.6808510637  
11,1,6493.7674418604  
11,1,10654.7187500001  
11,1,10294.6079545454  
11,1,18709.0657894737

11,1,5137.8604651161  
11,1,6393.2727272728  
12,2,5797.7470930233  
12,2,6545.9821428571  
12,2,5673.4838709677  
12,2,9425.0263157894  
12,2,5768.3822115385  
12,2,5961.6216216216  
12,2,6560.3488372093  
12,2,10366.12499999998  
12,2,6469.5234375  
12,2,6716.3108974359  
12,2,8096.755952381  
12,2,6514.7765151516  
12,2,10178.975609756  
12,2,9320.2724358976  
12,2,5136.443452381  
12,2,6775.4320652173  
12,2,5526.9999999999  
12,2,7815.9797297296  
12,2,5061.0425531915  
12,2,7490.4444444444  
12,2,6701.9615384616  
12,2,5133.3140243902  
12,2,8673.2500000003  
12,2,11599.2954545455  
12,2,6532.6681034483  
12,2,6802.6704545454  
12,2,8693.5381355933  
12,2,7377.8837209302  
12,2,6770.0166666667  
12,2,8256.4941860466  
12,2,7157.2857142857  
12,2,7852.8245192307  
12,2,5621.5405405406  
12,2,5495.8571428573  
12,2,6830.8181818181  
12,2,8676.7326388889  
12,2,8558.1250000001  
12,2,10885.9017857143  
12,2,6313.4146341464  
12,2,7407.6354166668  
12,2,5900.3068181818  
12,2,5639.1102941176  
12,2,5963.2833333333  
12,2,6429.1617647059  
12,2,5463.9540816326  
12,2,9333.1600000003  
12,2,6221.4979166665  
12,2,6320.2386363637  
12,2,6055.4744318183  
12,2,7204.1323529412  
12,2,7876.9044117647  
12,2,5171.3658536585  
12,2,7135.4736842105  
12,2,5592.83203125  
12,2,9748.7848837208  
12,2,5328.2720588235  
12,2,6919.4666666667  
12,2,10795.8532608695  
12,2,6543.1291666666  
12,2,11417.3494318182  
12,2,7925.221590909  
12,2,9670.421875  
12,2,7253.3636363637  
12,2,7173.7321428571

12,2,7126.5714285715  
12,2,5218.6022727272  
12,2,5941.9880952381  
12,2,12614.605263158  
12,2,5439.5303030303  
12,2,5892.4054054054  
12,2,5279.1805555555  
12,2,6300.3157894736  
12,2,5731.2523584907  
12,2,5414.03125  
12,2,7244.9166666668  
12,2,7587.4285714285  
12,2,9565.6428571427  
12,2,5363.826923077  
12,2,5529.9966216216  
12,2,11527.0319148938  
12,2,11063.1428571429  
12,2,6461.5128205128  
12,2,8012.205882353  
12,2,6559.3524999999  
12,2,6860.1700000001  
12,2,8279.6540697675  
12,2,5658.0111111112  
12,2,10868.90625  
12,2,7726.4821428571  
12,2,6054.6666666668  
12,2,8217.5386904762  
12,2,6278.7647058824  
12,2,5541.3823529414  
12,2,5208.7333333333  
12,2,6990.0294117648  
12,2,10745.5036764707  
12,2,5955.6666666666  
12,2,9068.9230769232  
12,2,5207.5992647058  
12,2,6746.1488095238  
12,2,8875.2925531917  
12,2,5132.8125  
12,2,8211.3333333334  
12,2,5586.9423076923  
12,2,7141.2822580645  
13,1,17973.1499999999  
13,1,8056.1597222223  
13,1,6113.2777777778  
13,1,13157.1888297872  
13,1,9971.6704545455  
13,1,5845.03125  
13,1,9297.8125  
13,1,11742.1569148936  
13,1,16620.7203947368  
13,1,9774.3804347824  
13,1,9921.838362069  
13,1,12378.75  
13,1,9165.3897058823  
13,1,5356.3514150943  
13,1,7139.9014423077  
13,1,9750.2784090909  
13,1,8844.4255319151  
13,1,9006.1171875  
13,1,11214.9318181819  
13,1,5628.1486486489  
13,1,17345.7529761906  
13,1,9938.2536764706  
13,1,19287.7826086958  
13,1,19312.746794872  
13,1,6702.4343749999

13,1,8568.9908536585  
13,1,9649.6538461539  
13,1,5752.5892857143  
13,1,7773.35  
13,1,7267  
13,1,13128.8947368421  
13,1,11115.3670212769  
13,1,7426.2419354839  
13,1,17463.3494318182  
13,1,16267.1101190476  
13,1,13296.3529411765  
13,1,5962.8749999999  
13,1,5557.1933962264  
13,1,7071.6219512195  
13,1,9147.4285714286  
13,1,8515.0130208333  
13,1,14513.8624999998  
13,1,14550.1691176475  
13,1,15886.0568181819  
13,1,7831.671875  
13,1,14897.2207446809  
13,1,10146.0723684208  
13,1,5578.5857142857  
13,1,6727.576923077  
13,1,6175.5234375  
13,1,12483.7165178574  
13,1,12907.8589743591  
13,1,13117.6410256411  
13,1,6638.5  
13,1,16037.7028301886  
13,1,6148.6173469388  
13,1,5762.2205882353  
13,1,7637.8173076924  
13,1,7851.078125  
13,1,7464.3400000002  
13,1,6091.0552325582  
13,1,9847.875  
13,1,9130.3070652174  
13,1,5207.9222972973  
13,1,11575.8666666668  
13,1,9394  
13,1,10339.0290697674  
13,1,6261.1666666666  
13,1,9428.1666666667  
13,1,6856.5884146344  
13,1,5053.4517045455  
13,1,10107.2348484845  
13,1,5518.8916666667  
13,1,7441.4940476191  
13,1,7272.8235294118  
13,1,8720.0961538462  
13,1,5692.2272727273  
13,1,10953.641025641  
13,1,6704.1125000001  
13,1,6334.544117647  
13,1,7516.9117647058  
13,1,6062.16875  
13,1,10996.9006410257  
13,1,9273.4468085107  
13,1,12518.5555555554  
13,1,5043.3352272728  
13,1,5684.5612244898  
13,1,9836.625  
13,1,17096.5642857142  
13,1,14950.3256578948  
13,1,16909.6808510637

13,1,6352.113372093  
13,1,5245.9934210525  
13,1,7815.3776041667  
13,1,18454.0261627908  
13,1,14351.659090909  
13,1,13303.0239361705  
13,1,6530.9285714285  
13,1,10462.1781249999  
13,1,10606.7386363634  
13,1,10466.5476190477  
13,1,13385.7500000001  
13,1,10723.2105263158  
13,1,16724.5483870965  
13,1,7979.4468085108  
13,1,19705.87890625  
13,1,9491.81875  
13,1,16961.8511904765  
13,1,7492.2941176472  
13,1,9584.3750000001  
13,1,7264.0288461538  
13,1,8045.7138157894  
13,1,7589.3355263158  
13,1,7097.6730769232  
13,1,8142.2095588235  
13,1,10847.7368421055  
13,1,5994.2727272727  
13,1,16204.9913793104  
13,1,13211.4999999998  
13,1,12238.1745283016  
13,1,5038.39375  
13,1,19024.8225806452  
13,1,6484.6794871795  
13,1,6750.5238095237  
13,1,6545.6923076922  
13,1,17801.217391304  
13,1,18118.4673913044  
13,1,5673.9545454545  
13,1,12822.2142857142  
13,1,5992.2016129034  
13,1,8631.1458333333  
13,1,17038.4375  
13,1,5105.1875  
13,1,11519.36  
13,1,5756.966981132  
13,1,13205.0769230771  
13,1,5255.8537735848  
13,1,7655.234375  
13,1,5434.177631579  
13,1,5760.9032258065  
13,1,7436.783898305  
13,1,15021.0142857142  
13,1,9541.0076530613  
13,1,5410.4481707316  
13,1,6829.2875  
13,1,5028.4523809523  
13,1,5149.6583333333  
13,1,10648.1666666666  
13,1,6333.3125000001  
13,1,14967.4180327867  
13,1,9651.8719512195  
13,1,12381.5161290322  
13,1,5970.9027777777  
13,1,5827.8750000001  
13,1,13081.1773255815  
13,1,10505.9508928568  
13,1,15116.0303030304

13,1,9851.1818181818  
13,1,9898.7037037037  
13,1,10878.5384615383  
13,1,12632.7894736841  
13,1,9555.4044117647  
13,1,8955.6785714286  
13,1,9047.15  
13,1,7941.4305555555  
13,1,5043.918918919  
13,1,19648.5749999999  
13,1,6151.369047619  
13,1,5045.8478260869  
13,1,8945.9540816326  
13,1,5645.302631579  
13,1,18232.0142857144  
14,2,9411.8139534884  
14,2,7987.8804347826  
14,2,6872.1718750001  
14,2,8464.9312499999  
14,2,8623.0921052632  
14,2,6308.875  
14,2,7858.9769736841  
14,2,6283.5945121951  
14,2,7789.2565789474  
14,2,6290.6764705882  
14,2,7268.2222222222  
14,2,12591.534090909  
14,2,7040.3333333332  
14,2,11013.2285714284  
14,2,7178.9756097561  
14,2,8497.0978260869  
14,2,9476.4473684209  
14,2,7362.9891304348  
14,2,6398.5657894738  
14,2,5823.4375  
14,2,6842.2857142858  
14,2,7181.6923076924  
14,2,6744.7039473685  
14,2,8042.1170212766  
14,2,6574.516025641  
14,2,8494.3365384616  
14,2,5288.2894736842  
14,2,6681.6346153846  
14,2,6084.3870967742  
14,2,6783.4261363636  
14,2,11203.2166666667  
14,2,7072.9093749999  
14,2,6900.2302631581  
14,2,5859.9177631579  
14,2,8825.4573170731  
14,2,6425.8571428572  
14,2,5836.1730769232  
14,2,11939.2749999999  
14,2,5408.8666666666  
14,2,5402.8310810811  
14,2,10869.8392857146  
14,2,5980.7419354839  
14,2,6073.1993243244  
14,2,7266.765625  
14,2,5309.2784090908  
14,2,8534.2500000001  
14,2,10523.506097561  
14,2,5006.3611111111  
14,2,10485.4705882354  
14,2,8679.4331395348  
14,2,10463.6111111112

14,2,10926.8823529412  
14,2,5111.5654761905  
14,2,8495.0640243902  
14,2,7935.1120689655  
14,2,9212.6453488374  
14,2,6011.5535714286  
14,2,8534.0641891892  
14,2,6697.1136363637  
14,2,5869.2279411765  
14,2,6364.109375  
14,2,6325.1293103449  
14,2,6831.2149122806  
14,2,12318.6830357144  
14,2,12548.582317073  
14,2,8459.0243902439  
14,2,8343.15  
14,2,5430.6032608696  
14,2,5537.8049999998  
14,2,7169.3913043477  
14,2,7433.8602941176  
14,2,12535.6335227271  
14,2,6429.7192982456  
14,2,5204.7474489796  
14,2,9980.9087837837  
14,2,8376.856707317  
14,2,6934.1304347826  
14,2,6677  
14,2,5605.75  
14,2,5894.7352941176  
14,2,11133.6057692307  
14,2,6432.2765957448  
14,2,9661.6433823529  
14,2,6490.7692307692  
14,2,6561.7741935483  
14,2,5561.3660714286  
14,2,7052.9310344827  
14,2,10921.6470588236  
14,2,5016.5964285715  
14,2,6310.1175  
14,2,5063.8140243903  
14,2,9885.1219512193  
15,1,5115.4545454546  
15,1,10351.1213235292  
15,1,5984.5535714285  
15,1,17001.5357142856  
15,1,18788.6341463416  
15,1,12510.2629310344  
15,1,6412.6842105263  
15,1,14883.0454545456  
15,1,13849.9285714288  
15,1,5611.1777777777  
15,1,11935.1190476189  
15,1,13913.8142857142  
15,1,6170.2777777778  
15,1,16011.3125  
15,1,16895.5806451613  
15,1,13780.9375  
15,1,6189.93125  
15,1,14165.4807692309  
15,1,11937.0218253966  
15,1,12296.2812500001  
15,1,5366.7907608696  
15,1,7748.8571428571  
15,1,15866.9729729729  
15,1,6409.512195122  
15,1,5263.1515957447

15,1,6590.6249999998  
15,1,5560.0624999998  
15,1,13858.2192982453  
15,1,5951.5432692307  
15,1,11157.5823170734  
15,1,5194.3658536585  
15,1,9104.078125  
15,1,17521.96875  
15,1,5424.7291666667  
15,1,7558.9149999999  
15,1,6070.1715116281  
15,1,18106.0058139536  
15,1,18718.8750000001  
15,1,12453.9622093024  
15,1,14211.0657894738  
15,1,9916.09375  
15,1,11454.1927083333  
15,1,13324.1212121212  
15,1,18455.2664473684  
15,1,12656.5328947369  
15,1,12305  
15,1,6779.5454545454  
15,1,6069.7872340425  
15,1,11174.2897727277  
15,1,13551.6800000001  
15,1,7608.14  
15,1,11429.9375  
15,1,6606.514423077  
15,1,5472.1075581395  
15,1,9695.7205882351  
15,1,5812.3546511628  
15,1,9758.1923076923  
15,1,10241.2647058821  
15,1,7428.0767045455  
15,1,5884.5818181817  
15,1,10532.0972222222  
15,1,8111.3666666667  
15,1,15523.2111111109  
15,1,5139.5384615385  
15,1,12286.0261627906  
15,1,14861.9999999999  
15,1,12803.0913461538  
15,1,19050.1774193549  
15,1,11842.1484375  
15,1,8758.96875  
15,1,5440.4204545454  
15,1,10862.09375  
15,1,12188.2149999996  
15,1,8000.8181818181  
15,1,16077.2056451613  
15,1,13738.697368421  
15,1,13333.8083333334  
15,1,8542.18877551  
15,1,7817.0312500002  
15,1,5438.44140625  
15,1,9612.3892045454  
15,1,11375.0714285712  
15,1,8101.0833333334  
15,1,7481.0416666668  
15,1,13444.2439024394  
15,1,11861.5  
15,1,5576.1554054054  
15,1,5856.2164634146  
15,1,19454.875  
15,1,5261.0625  
15,1,11739.6301020406

15,1,9935.375  
15,1,12880.875  
15,1,5938.2653061224  
15,1,8931.0294117646  
15,1,9816.5  
15,1,11136.6587837837  
15,1,8054.6280487807  
15,1,7778.1647727272  
15,1,7633.5773809524  
15,1,6713.1361111111  
15,1,5523.4256756756  
15,1,8562.125  
15,1,9443.6223958333  
15,1,7142.6293103449  
15,1,10909.8214285715  
15,1,13588.9572368422  
15,1,15822.6041666666  
15,1,6824.1958333334  
15,1,7367.7692307692  
15,1,5167.6909090909  
15,1,16637.3295454545  
15,1,14408.0517241379  
15,1,9237.9210526316  
15,1,19395.9230769231  
15,1,6196  
15,1,7725.8333333334  
15,1,6312.3828125001  
15,1,10658  
15,1,5731.3857142857  
15,1,16855.1666666666  
15,1,7382.175595238  
15,1,17905.4392857141  
15,1,6235.6392045454  
15,1,15969.5653409095  
15,1,13083.2682926828  
15,1,10740.8469387756  
15,1,5889.5771276596  
15,1,11355.0178571427  
15,1,8881.6025  
15,1,10429.3333333334  
15,1,6550.8723404255  
15,1,11724.7022058823  
15,1,17835.125  
15,1,9510.375  
15,1,17973.8557692306  
15,1,10779.3823529411  
15,1,6596.2205882353  
15,1,15109.3026315789  
15,1,13817.6976744188  
15,1,6703.049689441  
15,1,12180.7678571428  
15,1,12463.7403846152  
15,1,6944.1312500001  
15,1,5471.9034090909  
15,1,17376.96875  
15,1,6072.0135135136  
15,1,14846.7291666668  
15,1,11411.2836538461  
15,1,8017.2727272727  
15,1,8044.71875  
15,1,12793.4870689655  
15,1,13537.1666666666  
15,1,14416.9433962266  
15,1,8633.7666666667  
15,1,6327.7022058823  
15,1,6626.4210526316

15,1,5733.4451219512  
15,1,8697.5  
15,1,6116.2195121951  
15,1,6051.2093023256  
15,1,5133.7282608696  
15,1,5766.8444444446  
15,1,18054.0454545455  
15,1,6301.2790697674  
15,1,9572.0476190475  
15,1,8330.2606382979  
15,1,9720.7573529411  
15,1,14692.356060606  
15,1,5764.1385135135  
15,1,13559.909090909  
15,1,12838.6764705886  
15,1,6261.5128205128  
15,1,7193.1282051282  
15,1,19697.046875  
15,1,9138.9431818181  
15,1,5204.1474358974  
15,1,5098.6479591837  
15,1,19886.5375000002  
15,1,9831.4852941179  
15,1,6392.6249999999  
15,1,18194.5454545455  
16,2,5367.1714285714  
16,2,6448.2500000001  
16,2,5237.3333333334  
16,2,8151.0365853659  
16,2,10560.8235294119  
16,2,5813.3310810811  
16,2,6874.4324324324  
16,2,7716.2837837837  
16,2,8750.1047297297  
16,2,7381.9756097561  
16,2,5974.4177631579  
16,2,10107.8421052631  
16,2,9113.0961538462  
16,2,5726.0927419355  
16,2,5456.8235294118  
16,2,5021.7407407407  
16,2,7247.8888888889  
16,2,5156.6972222222  
16,2,5914.4551282052  
16,2,5007.5  
16,2,5205.4966216216  
16,2,6931.0526315789  
16,2,5726.8333333332  
16,2,6101.9324324324  
16,2,6590.6118421053  
16,2,5284.0902777778  
16,2,5456.2794117647  
16,2,7532.7890625  
16,2,5605.1730769231  
16,2,7067.95  
16,2,8270.6785714285  
16,2,6835.3696808511  
16,2,12033.6691176472  
16,2,5971.6666666666  
16,2,6172.1004901961  
16,2,6407.1702127658  
16,2,5994.4893617021  
16,2,6167.5919117647  
16,2,8203.3839285714  
16,2,6690.22  
16,2,8358.3839285714

16,2,6125.75  
16,2,7273.5224358973  
16,2,5350.0865384615  
16,2,5824.8963414635  
16,2,5544.710106383  
16,2,5282.5999999999  
16,2,9657.0608108107  
16,2,5398.320754717  
16,2,5329.7763157895  
16,2,6691.78125  
16,2,8397.4545454546  
16,2,5083.8445121951  
16,2,7341.4042553191  
16,2,10980.6458333334  
16,2,6817.3722222222  
16,2,6517.7357954547  
16,2,9233.7  
16,2,6212.1029411765  
16,2,6035.3392857143  
16,2,6210.8244680851  
16,2,8209.63125  
16,2,9509.625  
16,2,7494.0666666667  
16,2,6409.0148809524  
16,2,5023.6822916666  
16,2,10519.9583333333  
16,2,6806.2980769231  
16,2,6721.0555555554  
16,2,8559.8920454545  
16,2,11880.6158536587  
16,2,7437.0735294116  
16,2,5563.9078947368  
16,2,6396.1130952381  
16,2,6267.6836734693  
16,2,11060.0888157895  
16,2,5466.1627358491  
16,2,7600.75  
16,2,9371.3585526315  
16,2,8037.3714285714  
16,2,9148.7195121951  
16,2,7553.6730769231  
16,2,5216.5092592593  
16,2,6535.2826086958  
16,2,6512  
16,2,6130.7058823529  
16,2,5498.4329268293  
16,2,6652.8378378378  
16,2,5839.2307692308  
16,2,5949.7703488372  
16,2,8049.0192307692  
16,2,9902.2865853659  
16,2,6824.013157895  
16,2,8797.0968750001  
16,2,10117.1666666667  
16,2,7658.4000000001  
16,2,9997.4903846154  
16,2,9022.0083333333  
16,2,5900.5326086956  
16,2,6855.0404411765  
16,2,7541.3355263158  
16,2,6396.7032258064  
16,2,5052.8529411765  
16,2,5484.8026315789  
16,2,7748.5294117647  
17,1,13153.892857143  
17,1,16159.0769230767

17,1,6925.7211538461  
17,1,5160.6909090909  
17,1,9231.3059210525  
17,1,10237.7647058823  
17,1,5760.2884615385  
17,1,8325.2007575756  
17,1,16012.7916666664  
17,1,5401.8970588236  
17,1,18182.7499999999  
17,1,8648.6875  
17,1,16964.8823529411  
17,1,13975.8863636364  
17,1,18715.9473684208  
17,1,7607.1686046511  
17,1,10185.9649122806  
17,1,5734.5535714285  
17,1,5352.2445652175  
17,1,12841.0735294118  
17,1,6075.4007352941  
17,1,5193.8579545454  
17,1,19685.8684210522  
17,1,11337.1874999999  
17,1,5209.2536764706  
17,1,5109.4375000001  
17,1,10455.0823170732  
17,1,9010.1951219512  
17,1,19835.8343750002  
17,1,13405.8617021276  
17,1,7185.8525000001  
17,1,6401.46875  
17,1,16850.7589285713  
17,1,18974.2218750001  
17,1,9464.9848484848  
17,1,8152.9320652174  
17,1,18171.9249999999  
17,1,12747.7529069765  
17,1,6583.6071428572  
17,1,6804.5000000001  
17,1,8948.9375  
17,1,5023.5500000001  
17,1,9196.5138888888  
17,1,7579.641025641  
17,1,7640.0243902439  
17,1,5527.130952381  
17,1,8690.8703703704  
17,1,14056.5310880829  
17,1,17491.5089285715  
17,1,8882.125  
17,1,5627.9574468085  
17,1,6387.5675675675  
17,1,7053.9464285715  
17,1,6082.6190476191  
17,1,7763.5294117648  
17,1,10478.0081521736  
17,1,16948.4431818183  
17,1,8774.3016304348  
17,1,12688.044642857  
17,1,8589.9285714286  
17,1,5716.6756756757  
17,1,7469.2401960785  
17,1,14646.0000000004  
17,1,14983.6249999997  
17,1,13573.203125  
17,1,5893.6423611111  
17,1,19284.7051282051  
17,1,5578.8958333333

17,1,10522.7685185185  
17,1,19580.6764705885  
17,1,11545.6457142857  
17,1,15051.9962121212  
17,1,6364.7173913044  
17,1,9831.9411764707  
17,1,5062.9761904761  
17,1,6757.4803921569  
17,1,5752.0000000001  
17,1,9543.3081395348  
17,1,10028.0500000001  
17,1,5657.7926829269  
17,1,9356.0795454546  
17,1,7885.1475  
17,1,5186.4901315789  
17,1,7202.2819148937  
17,1,13176.7976190471  
17,1,13296.3547297297  
17,1,6769.0000000001  
17,1,17055.8472222222  
17,1,15168.6574999996  
17,1,5481.0853658536  
17,1,6120.6114130436  
17,1,8841.9519230769  
17,1,7061.8125000001  
17,1,12694.9166666668  
17,1,5830.9273255813  
17,1,11000  
17,1,6596.0961538462  
17,1,10462.0416666668  
17,1,9026.78  
17,1,16290.857638889  
17,1,15462.7105263158  
17,1,6056.0510204082  
17,1,19596.9999999998  
17,1,19476.5500000004  
17,1,11942.445945946  
17,1,16665.6666666667  
17,1,11125.9583333336  
17,1,8923.5152439024  
17,1,14116.2430555556  
17,1,16431.8095238097  
17,1,16690.8676470588  
17,1,5478.1940789472  
17,1,8878.3749999999  
17,1,7438.1482558139  
17,1,11045.6903409092  
17,1,13790.0000000003  
17,1,6706.9736842105  
17,1,8500.1802325582  
17,1,5272.0425531916  
17,1,10947.15625  
17,1,5384.8472222221  
17,1,5917.0955882352  
17,1,16740.5608108106  
17,1,7267.3426573426  
17,1,10581.2703488374  
17,1,6733.6029411765  
17,1,8039.862244898  
17,1,8406.7432432434  
17,1,10818.1015625  
17,1,6740.6341463416  
17,1,5719.7243589744  
17,1,13562.9329268295  
17,1,6241.6666666668  
17,1,11414.9725609756

17,1,5883.8284883722  
17,1,16423.9166666665  
17,1,5731.8048780488  
17,1,9521.3421052631  
17,1,5866.7171052632  
17,1,10960.6666666668  
17,1,6824.8653846156  
17,1,7182.0322580645  
17,1,13279.4291666663  
17,1,15940.8500000001  
17,1,7899.0657894736  
17,1,13569.1790540541  
17,1,7074.0091463415  
17,1,5366.005952381  
17,1,7194.7535714286  
17,1,12524.2312500001  
17,1,7073.875  
17,1,6691.9318181819  
17,1,5978.0639534884  
18,2,5302.2777777777  
18,2,5676.9375000001  
18,2,11492.0657894737  
18,2,5421.0434782609  
18,2,6988.8841463414  
18,2,14140.9302325583  
18,2,6910.1630434783  
18,2,9781.1  
18,2,9996.6627906976  
18,2,7734.2439024391  
18,2,10711.0697674417  
18,2,10442.1749999999  
18,2,5447.9743589743  
18,2,5986.1726190475  
18,2,5675.1612903226  
18,2,8373.668478261  
18,2,8737.8928571428  
18,2,7388.6923076923  
18,2,7582.3999999999  
18,2,6833.3333333333  
18,2,8854.75  
18,2,8550.3552631579  
18,2,9249.9114583333  
18,2,6728.8571428572  
18,2,5205.2072368421  
18,2,9092.5772058824  
18,2,11553.96875  
18,2,9505.309375  
18,2,9872.0681818181  
18,2,5727.3717948718  
18,2,5289.5465116279  
18,2,5483.5  
18,2,7924.75  
18,2,5097.7083333334  
18,2,5119.8467741936  
18,2,5415.0523255814  
18,2,7115.1634615384  
18,2,10686.2364864864  
18,2,6442.6636904762  
18,2,6802.2857142856  
18,2,7837.9625  
18,2,11812.1547619047  
18,2,5307.3774038462  
18,2,8288.9935897436  
18,2,8126.3579545454  
18,2,5281.3600000001  
18,2,5783.4736842107

18,2,5542.2113095238  
18,2,7021.8852040817  
18,2,6773.2647058824  
18,2,8829.8571428572  
18,2,9193.28125  
18,2,5457.9821428572  
18,2,11449.042613636  
18,2,5285.0119047619  
18,2,7319.9268292684  
18,2,5126.8493589744  
18,2,6688.875  
18,2,5113.7420212766  
18,2,7650.3475609756  
18,2,5483.1403061223  
18,2,5518.3194444444  
18,2,9393.9111111112  
18,2,6993.1538461539  
18,2,8793.875  
18,2,6493.7083333333  
18,2,6182.75  
18,2,5961.7000000001  
18,2,8827.4340277777  
18,2,8254.5357142857  
18,2,5731.4973958334  
18,2,6582.8076923077  
18,2,8736.2983870968  
18,2,8154.5625000001  
18,2,13468.1057692308  
18,2,6241.8352272726  
18,2,6354.9338235295  
18,2,5736.5457317073  
18,2,6132.0535714286  
18,2,5911.7692307692  
18,2,5415.1449999999  
18,2,5946.4736842105  
18,2,5865.3846153847  
19,1,5330.5865384615  
19,1,10093.8687499999  
19,1,7285.4567307693  
19,1,7524.169642857  
19,1,6650.8823529411  
19,1,5774.8173076923  
19,1,13916.3142857143  
19,1,13843.0972222225  
19,1,17305.2926829268  
19,1,6232.8720930233  
19,1,5912.1627906977  
19,1,11932.6875  
19,1,10739.875  
19,1,9573.4661458334  
19,1,14883.8749999999  
19,1,11302.5673076922  
19,1,13328.4742647057  
19,1,5935.0397727274  
19,1,5598.8699999999  
19,1,6195.7318181818  
19,1,10119.8238636362  
19,1,5860.25  
19,1,11059.843137255  
19,1,7043.3557692308  
19,1,5050.3571428572  
19,1,5983.8579545454  
19,1,11682.6875  
19,1,12611.9448529411  
19,1,14100.382142857  
19,1,9571.1892857143

19,1,7326.2916666668  
19,1,7733.2388888888  
19,1,5476.7325581396  
19,1,8554.0625  
19,1,12000.2051282051  
19,1,6839.9934210526  
19,1,7067.9716981131  
19,1,13857.196428571  
19,1,5326.4000000001  
19,1,14948.8919491525  
19,1,15365.0343749998  
19,1,17561.2875  
19,1,13868.875  
19,1,18167.40625  
19,1,10289.0000000001  
19,1,17365.5506756756  
19,1,19198.4459459459  
19,1,11479.0723684209  
19,1,17222.8284883721  
19,1,9508.6785714287  
19,1,5668.7414772728  
19,1,19586.75  
19,1,11393.4329268295  
19,1,13318.578125  
19,1,5671.8255813952  
19,1,19897.081521739  
19,1,8337.9574468087  
19,1,15373.1219512193  
19,1,5470.82  
19,1,6843.1726190476  
19,1,5261.5999999999  
19,1,13063.2968749999  
19,1,10172.674418605  
19,1,12052.0897435896  
19,1,11478.296875  
19,1,13166.8392857143  
19,1,13760.7340909094  
19,1,16422.3156250001  
19,1,5392.4181818181  
19,1,6012.8214285714  
19,1,8214.9285714285  
19,1,5179.2  
19,1,7498.65625  
19,1,10740.2678571424  
19,1,13401.0681818182  
19,1,5858.914893617  
19,1,12112.1153846154  
19,1,6456.1794871795  
19,1,17423.6603773581  
19,1,5569  
19,1,7764.275  
19,1,9997.4687499997  
19,1,11783.1607142858  
19,1,7915.5902777778  
19,1,5538.6223958334  
19,1,5338.4583333334  
19,1,7862.9948979591  
19,1,8913.2645348836  
19,1,18926.3333333332  
19,1,8344.9817073172  
19,1,8589.9357142859  
19,1,5339.4772727272  
19,1,6267.6902173913  
19,1,16566.0135135136  
19,1,5357.0000000001  
19,1,9321.4375

19,1,6895.4481707316  
19,1,7752.3837209302  
19,1,11203.4095744679  
19,1,14480.9351851852  
19,1,6795.8400000001  
19,1,7518.7219387752  
19,1,12166.2604166664  
19,1,5715.9117647059  
19,1,5563.25  
19,1,13917.2019230769  
19,1,6117.9505208334  
19,1,8105.5297619046  
19,1,5634  
19,1,18735.4651162792  
19,1,5449.1607142857  
19,1,5715.4318181817  
19,1,5608.2172619048  
19,1,8666.0681818183  
19,1,8787.0961538462  
19,1,13402.7500000001  
19,1,8795.2558139533  
19,1,6440.4795918367  
19,1,7895.875  
19,1,6930.046875  
19,1,18231.8749999999  
19,1,12704.2606382977  
19,1,18844.6911764704  
19,1,6480.7990196078  
19,1,8948.7142857143  
19,1,9642.0729166666  
19,1,9213.9144736842  
19,1,5340  
19,1,13891.05625  
19,1,15124.0265957443  
19,1,14827.6499999996  
19,1,6753.8359375  
19,1,9396.631818182  
19,1,12032.2042682924  
19,1,16799.1033653845  
19,1,17923.2549019606  
19,1,7726.900862069  
19,1,5549.4245283019  
19,1,19168.4999999999  
19,1,11556.8384146341  
19,1,13955.9054054053  
19,1,6015.2333333332  
19,1,11226.9800000001  
19,1,5281.215625  
19,1,15012.09375  
19,1,13158.0773809524  
19,1,12773.1121794872  
19,1,7269.6486486485  
19,1,5034.25  
19,1,8130.1121794872  
19,1,7356.03125  
19,1,8535.775510204  
19,1,5764.2828947369  
19,1,11255.8316326534  
19,1,13337.6973684211  
19,1,8272.9736842106  
19,1,5599.4175000001  
19,1,8763.7023809523  
19,1,6366.0638888889  
19,1,11262.1086956522  
19,1,6126.3928571428  
19,1,7221.5542452827

19,1,5439.9345238096  
19,1,10602.2934782609  
19,1,7150.703125  
19,1,12862.28515625  
19,1,5345.2166666667  
19,1,5126.8445945946  
19,1,16484.1322115386  
19,1,7814.1346153846  
19,1,6241.25  
19,1,15816.7980769231  
19,1,5953.8181818181  
19,1,18830.8645833333  
19,1,12518.75  
19,1,15961.1276041669  
19,1,7572.2821428572  
19,1,13659.9166666667  
19,1,14316.4423076926  
19,1,9826.0344827586  
19,1,12383.5283018871  
19,1,6212.6198979592  
19,1,10330.5588235295  
19,1,8975.8666666668  
19,1,6011.5357142859  
19,1,5273.8691860466  
19,1,13477.5518292684  
19,1,8689.7995283019  
19,1,13768.2931034484  
19,1,9373.4186046512  
19,1,9138.2828947369  
19,1,9791.2916666662  
19,1,6784.1904761905  
19,1,15194.9404761905  
19,1,6909.6666666666  
19,1,15674.4137931034  
19,1,7974.2156250001  
19,1,5418.1994047619  
19,1,12025.4389534883  
19,1,9132.4146341463  
19,1,5248.8566176469  
19,1,12998.2105263159  
19,1,7173.3141025642  
19,1,10504.6442307689  
19,1,9673.3461538462  
19,1,9969.0625  
19,1,9756.0803571425  
19,1,12075.2608695654  
19,1,18762.5306122447  
19,1,12029.4625000003  
19,1,9250.1249999999  
19,1,6889.25  
19,1,5187.8720930234  
19,1,8445.6517857142  
19,1,5848.1829268295  
19,1,14436.5500000002  
19,1,9144.3482142856  
19,1,6499.2259615387  
19,1,8371.8538135593  
19,1,10635.2321428572  
19,1,16307.8472222225  
19,1,8673.3809523809  
19,1,5860.1348684211  
19,1,17161.7142857141  
19,1,10602.2177419353  
19,1,8723.3529411765  
19,1,7940.5166666667  
19,1,7111.7279411765

19,1,6899.4677419354  
19,1,9816.361111111  
20,2,5424.5535714286  
20,2,6493.8600000001  
20,2,6200.7648809525  
20,2,6481.7826086956  
20,2,9434.2894736842  
20,2,5270.1621621621  
20,2,5353.5319148935  
20,2,7561.6976744187  
20,2,6787.9275000001  
20,2,6028.1818181819  
20,2,6445.4460784314  
20,2,5256.5096153846  
20,2,7867.3352272728  
20,2,6442.1923076924  
20,2,6158.5909090909  
20,2,6436.89375  
20,2,5465.6666666667  
20,2,9097.3782051283  
20,2,9146.3263473053  
20,2,11634.955882353  
20,2,6310.5  
20,2,9125.7388888889  
20,2,5019.4166666667  
20,2,7127.6037735849  
20,2,8772.125  
20,2,9091.6022727272  
20,2,11137.2583333334  
20,2,8978.625  
20,2,6802.0930232558  
20,2,6688.3597560975  
20,2,8815.2838427948  
20,2,8892.8723404255  
20,2,7557.5714285714  
20,2,7951.4722222223  
20,2,5108.13  
20,2,6150.6666666666  
20,2,5680.5528846154  
20,2,6510.8365384616  
20,2,7875.3993902439  
20,2,6348.675595238  
20,2,5939.515625  
20,2,5937.9666666667  
20,2,7131.6923076924  
20,2,11613.0081521738  
20,2,8010.65  
20,2,7625.4285714285  
20,2,5248.81875  
20,2,7350.6428571428  
20,2,6040.4893617021  
20,2,7265.5406976744  
20,2,6488.5737179487  
20,2,6825.5182926828  
20,2,5508.9735576923  
20,2,7489.5984848484  
20,2,7408.5137931035  
20,2,10248.6437500001  
20,2,6005.8546511628  
20,2,8131.3679245282  
20,2,9850.6902173913  
20,2,9007.2916666667  
20,2,7822.4038461539  
20,2,11950.9056122448  
20,2,5251.0982142857  
20,2,6573.625

20,2,5926.4886363637  
20,2,5392.8897058825  
20,2,5338.2989130434  
20,2,5051.3062499998  
20,2,8070.0760869566  
20,2,5077.0186170213  
20,2,5598.0833333334  
20,2,10047.5738916256  
20,2,9235.9840425532  
20,2,6903.75  
20,2,9012.25  
20,2,8729.5164473685  
20,2,6410.6323529412  
20,2,5542.2045454546  
20,2,5724.0526315789  
20,2,5686.1136363638  
20,2,6515.2927631578  
20,2,6636.4021739132  
20,2,7828.9293478262  
20,2,10438.140625  
20,2,5532.625  
20,2,6222.7621951221  
20,2,11202.2234042552  
20,2,5067.7708333331  
20,2,11030.8333333332  
20,2,5672.6015625  
20,2,5069.4034090909  
20,2,6031.4732142857  
20,2,8640.3719512194  
20,2,5984.1055555555  
20,2,11910.6666666669  
20,2,8124.6675531915  
20,2,5604.7668918919  
23,1,6733.125  
23,1,16789.1499999998  
23,1,18720.5366379316  
23,1,13894.4017857143  
23,1,6903.5085227274  
23,1,6678.2200000001  
23,1,5391.518292683  
23,1,18828.0611111115  
23,1,6102.4245283019  
23,1,16752.7200000002  
23,1,6665.2075471701  
23,1,6069.1755319149  
23,1,6376.1162790697  
23,1,7128.8823529412  
23,1,9993.1388888889  
23,1,19787.010135135  
23,1,9666.9583333332  
23,1,11759.0558510638  
23,1,9289.6666666667  
23,1,6379.295  
23,1,5055.6875  
23,1,6958.4285714286  
23,1,7375.5192307691  
23,1,18247.5255681819  
23,1,8827.2666666668  
23,1,6225.4593023258  
23,1,8804.6341463414  
23,1,18540.5089820359  
23,1,13783.0326086961  
23,1,5415.9939024389  
23,1,8635.3088235294  
23,1,5290.2101063829  
23,1,6604.4

23,1,15739.0625000001  
23,1,17798.0892857142  
23,1,5410.3035714286  
23,1,15561.8035714285  
23,1,10683.2250000001  
23,1,7606.6189024389  
23,1,8275.9281914894  
23,1,10782.4875000002  
23,1,5716.4903846155  
23,1,7675.2173913043  
23,1,5194.6439393939  
23,1,8580.5357142858  
23,1,16682.9861111114  
23,1,9219.951219512  
23,1,7360.7403846154  
23,1,6401.7499999999  
23,1,8153.7692307693  
23,1,18558.544642857  
23,1,5651.3571428572  
23,1,19037.046511628  
23,1,6514.4583333334  
23,1,14026.6315789474  
23,1,9449.3125  
23,1,5545.5535714287  
23,1,5102.1125  
23,1,6186.2500000001  
23,1,8363.3402777776  
23,1,8220.3999999999  
23,1,6913.6956521739  
23,1,13098.2767857145  
23,1,7267.6226851852  
23,1,9341.36  
23,1,5358.1666666665  
23,1,5158.6381578949  
23,1,18305.5337837837  
23,1,6704.6071428569  
23,1,17562.4799999998  
23,1,10627.9375000001  
23,1,5207.6656976743  
23,1,6451.4634146342  
23,1,5460.9522058823  
23,1,5718.9277777776  
23,1,17700.4871794871  
23,1,8602.5000000001  
23,1,8526.4305555555  
23,1,6792.3749999999  
23,1,16082.4744897958  
23,1,9244.125  
23,1,6955.5595238095  
23,1,7657.7329545455  
23,1,5594.4836956521  
23,1,11556.1130952381  
23,1,5785.9186046513  
23,1,12352.9459459457  
23,1,10894.1344696971  
23,1,5595.4642857143  
23,1,17507.9324324325  
23,1,12573.5089285713  
23,1,15902.2692307692  
23,1,5176.1320754716  
23,1,9694.450892857  
23,1,11752.0599999999  
23,1,7696.9903846154  
23,1,7757.4042553193  
23,1,8228.8406862745  
23,1,5004.675

23,1,19975.1666666668  
23,1,6591.029661017  
23,1,8890.8177083334  
23,1,6238.03  
23,1,12250.7999999999  
23,1,8254.534375  
23,1,11344.75  
23,1,6771.5930232558  
23,1,16531.5462962964  
23,1,5950.9493243244  
23,1,6302.0452586205  
23,1,5062.0135135135  
23,1,15860.8629032259  
23,1,12080.9285714286  
23,1,18412.3371212121  
23,1,15136.8151041667  
23,1,5353.4779411765  
23,1,8435.0025510204  
23,1,11734.6354166663  
23,1,7648.3414634146  
23,1,8893.90625  
23,1,5450.25  
23,1,8063.8382352943  
23,1,5624.5204081632  
23,1,5935.0909090909  
23,1,19211.4535714285  
23,1,9351.875  
23,1,17638.5694444441  
23,1,8999.640625  
23,1,12121.0281249998  
23,1,10007.5789473685  
23,1,7141.8632075473  
23,1,7422.0493421052  
23,1,12650.1602564104  
23,1,15045.8815789473  
23,1,17983.8857142857  
23,1,13428.8055555557  
23,1,8251.9034090908  
23,1,5911.75  
23,1,8788.9166666667  
23,1,15033.8780487805  
23,1,7978.2279411765  
23,1,15492.5769230768  
23,1,8736.25  
23,1,6647.2682926828  
23,1,16280.0749999997  
23,1,19559.8455882352  
23,1,7380.6029411765  
23,1,14231.2604166667  
23,1,6550.32  
23,1,18615.9032258066  
23,1,13369.4451219511  
23,1,17654.2368421051  
23,1,14082.1666666664  
23,1,16798.2499999999  
23,1,10162.2499999999  
23,1,7726.159090909  
23,1,18666.6530612243  
23,1,5864.3397435898  
23,1,15653.125  
23,1,7425.0135135135  
23,1,15371.0937499998  
23,1,5659.875  
23,1,9877.3333333334  
23,1,9083.7410714284  
23,1,18293.1944444442

23,1,6681.3863636364  
23,1,14510.4899999999  
23,1,6415.3488372094  
23,1,5912.8717948719  
23,1,13250.2196969697  
23,1,5990.4243421052  
23,1,17931.6989795919  
23,1,5126.929054054  
23,1,12319.0319148936  
23,1,6476.2663043478  
23,1,14832.9642857146  
23,1,5035.8804347826  
23,1,15103.0855263157  
23,1,16719.875  
23,1,15768.2034883719  
23,1,7898.4553571428  
23,1,19954  
23,1,5941.3962765958  
23,1,16594.7999999998  
23,1,5084.8375  
23,1,12452.3125  
23,1,13578.0961538463  
23,1,14337.3333333334  
23,1,5119.5721153846  
23,1,19394.8622448978  
23,1,5158.5189393939  
23,1,9238.1595744681  
23,1,7771.5416666666  
23,1,5191.3541666667  
23,1,12078.8601694916  
23,1,13853.375  
23,1,10094.6577380953  
23,1,6425.8750000001  
23,1,5544.7975  
23,1,5631.3399999999  
23,1,15286.575892857  
23,1,10527.975806452  
23,1,5244.3414634146  
24,2,6962.8947368422  
24,2,7218.6923076922  
24,2,6451.3422619047  
24,2,6910.2837837838  
24,2,5069.697368421  
24,2,5653.0853658535  
24,2,6161.2960526316  
24,2,5397.9230769231  
24,2,11000.5984848485  
24,2,5045.9583333335  
24,2,5846.2195945945  
24,2,6771.9594594595  
24,2,6492.1162790697  
24,2,6904.0333333332  
24,2,11219.8716216216  
24,2,9604.703125  
24,2,8198.3083333333  
24,2,6390  
24,2,7488.8414634145  
24,2,5961.6425  
24,2,5906.5833333334  
24,2,7714.5320512821  
24,2,5952.3863636363  
24,2,8451.0178571429  
24,2,8210.9787234043  
24,2,6271.1533018869  
24,2,6767.5108695652  
24,2,6639.3491379311

24,2,5292.4155405405  
24,2,5566.0224358975  
24,2,7678.9375000002  
24,2,11161.2115384616  
24,2,5603.515625  
24,2,5207.2734375  
24,2,10310.9017857142  
24,2,5151.703125  
24,2,6446.5000000001  
24,2,8642.5454545454  
24,2,7974.7908163267  
24,2,6048.125  
24,2,7048.7171052632  
24,2,8638.015625  
24,2,7973.4358974359  
24,2,5178.07  
24,2,6652.5347222224  
24,2,6361.5882352942  
24,2,5578.6727272728  
24,2,9335.8772321431  
24,2,5251.9298780488  
24,2,5777.9268292683  
24,2,10768.8243243243  
24,2,5376.0663265306  
24,2,6363.4615384616  
24,2,10578.8633720934  
24,2,6455.3199999999  
24,2,5450.59375  
24,2,5658.7864583333  
24,2,8864.7946428573  
24,2,5135.75  
24,2,5795.9807692308  
24,2,11214.2169811321  
24,2,5586.4607843137  
24,2,8218.25  
24,2,5424.3809523809  
24,2,8809.709090909  
24,2,5368.9943181819  
24,2,8044.2741935485  
24,2,7710.0431034483  
24,2,6099.1121794871  
24,2,7103.155  
24,2,5224.4100000001  
24,2,5394.3936170213  
24,2,6963.6093749999  
24,2,6906.93125  
24,2,7606.4199999999  
24,2,10286.4840425531  
24,2,8038.1351351351  
24,2,6787.2307692307  
24,2,6597.2  
24,2,5087.0227272727  
21,1,5049.6875  
21,1,9572.3058510635  
21,1,8211.7195121951  
21,1,5544.8835978837  
21,1,6707.6492146597  
21,1,8302.237244898  
21,1,7283.75  
21,1,15898.8680555552  
21,1,10937.4342105264  
21,1,12411.918269231  
21,1,6376.5  
21,1,10022.015981735  
21,1,5210.0434782609  
21,1,5607.44140625

21,1,10516.3909090908  
21,1,18666.3076923079  
21,1,7785.9128787879  
21,1,7124.7448979591  
21,1,5572.8265306124  
21,1,7085.9767441861  
21,1,19084.7625000002  
21,1,8789.0540540541  
21,1,8160.7117346938  
21,1,8088.5  
21,1,7124.2916666666  
21,1,15771.4285714285  
21,1,13978.0416666666  
21,1,11305.18627451  
21,1,7407.9250000001  
21,1,8986.3942307692  
21,1,5798.7727272728  
21,1,7450.779296875  
21,1,5685.673076923  
21,1,7231.765957447  
21,1,5519.126984127  
21,1,6039.3125  
21,1,18059.6744186046  
21,1,6675.3048780488  
21,1,11743.5  
21,1,5037.9619565218  
21,1,5634.5930232559  
21,1,12227.9249999999  
21,1,5054.165625  
21,1,6653.4878048781  
21,1,6226.9488636363  
21,1,6644.625  
21,1,5504.7109375  
21,1,5711.4487179488  
21,1,5404.1303191489  
21,1,5785.125  
21,1,10000.2012195121  
21,1,7595.8571428572  
21,1,8700.4594594594  
21,1,6884.75  
21,1,12791.0306603774  
21,1,5138.3333333332  
21,1,13642.9255319144  
21,1,5017.445945946  
21,1,10235.8958333334  
21,1,8644.2598684211  
21,1,5572.3749999999  
21,1,16376.1467391306  
21,1,18463.5  
21,1,13888.2818181814  
21,1,18990.0232558138  
21,1,6905.3947368422  
21,1,6101.1754385967  
21,1,12618.2499999998  
21,1,7145.2073170731  
21,1,6975.5538461538  
21,1,8521  
21,1,5638.1493902439  
21,1,5519.6585365854  
21,1,6080.0243055555  
21,1,12765.8149999999  
21,1,7408.6153846153  
21,1,7789.0657894737  
21,1,7665.2173913043  
21,1,6305.3916666667  
21,1,12789.2305555556

21,1,9530.9166666667  
21,1,5873.59375  
21,1,8934.4310344827  
21,1,6033.8776595746  
21,1,5034.326923077  
21,1,8276.6219512195  
21,1,8262.7  
21,1,8494.7045454544  
21,1,6691.4042553191  
21,1,17568.5384615384  
21,1,6308.761904762  
21,1,7748.3333333333  
21,1,6340.59375  
21,1,8180.9880952382  
21,1,10066.6764705882  
21,1,5480.3024193548  
21,1,6240.3597560977  
21,1,5515.9500000001  
21,1,18780.238095238  
21,1,5761.119680851  
21,1,5997.3977272727  
21,1,14704.2352941178  
21,1,6273.8203124999  
21,1,5336.0000000001  
21,1,8194.9763513513  
21,1,12448.8723404256  
21,1,18525.7412790697  
21,1,11880.0977272727  
21,1,5102.32421875  
21,1,8536.0196078431  
21,1,13651.6046511628  
21,1,9200.1388888889  
21,1,7770.5999999999  
21,1,8668.6861702129  
21,1,7272.7872340426  
21,1,16686.7569444443  
21,1,8936.7732558139  
21,1,11886.8343749997  
21,1,18323.6785714287  
21,1,5417.5952380952  
21,1,8522.0208333333  
21,1,5149.3974358974  
21,1,9529.2282608696  
21,1,8579.1522727273  
21,1,7606.5919811319  
21,1,10213.1379310345  
21,1,16522.6155778894  
21,1,7173.4875000001  
21,1,5478.3255813954  
21,1,15029.358695652  
21,1,5025.8374999999  
21,1,10652.6835106384  
21,1,8199.0571428571  
21,1,9583.0104166667  
21,1,19735.5277777779  
21,1,15285.4583333334  
21,1,6660.7548076924  
21,1,11101.3928571428  
21,1,5782.125  
21,1,9421.9090909091  
21,1,7056.5151515154  
21,1,17522.9722222224  
21,1,5777.4335106384  
21,1,11713.9423076919  
21,1,5389.98125  
21,1,6652.8749999999

21,1,9884.7547169812  
21,1,10515.1046511628  
21,1,6092.8515625002  
21,1,9233.027027027  
21,1,5082.2352941177  
21,1,6964.222222222  
21,1,12135.6521739132  
21,1,16311.59375  
21,1,5088.7009803921  
21,1,10012.6486486487  
21,1,5410.6125  
21,1,5527.2058823529  
21,1,5535.0700000001  
21,1,5918  
21,1,6702.2022727272  
21,1,8665.2749999997  
21,1,5256.0598958332  
21,1,17128.8833333336  
21,1,9777.659375  
21,1,6525.5  
21,1,7396.3459302326  
21,1,5258.03125  
21,1,16919.3601694915  
21,1,6368.9722222223  
21,1,5724.3181818181  
21,1,8181.25  
21,1,6399.896226415  
21,1,18400.18  
21,1,8308.6216216217  
21,1,9545.0510204082  
21,1,15133.5714285713  
21,1,6675.1020408164  
22,2,7433.3787878788  
22,2,8225.9062499999  
22,2,5884.4522058823  
22,2,5454.375  
22,2,5053.552631579  
22,2,8658.9807692307  
22,2,8441.7613636363  
22,2,5389.4407894737  
22,2,5516.3256578948  
22,2,5674.5487804878  
22,2,5916.7954545454  
22,2,8419  
22,2,7455.5853658535  
22,2,6104.5197368421  
22,2,9220.8625000001  
22,2,5355.125  
22,2,6693.1375  
22,2,6726.2499999999  
22,2,6043.2499999999  
22,2,5146.0178571429  
22,2,6168.046875  
22,2,7971.625  
22,2,6998.858974359  
22,2,7962.5208333334  
22,2,6450.4666666666  
22,2,7369.3026315789  
22,2,5242.6166666667  
22,2,8985.53125  
22,2,6056.1481481481  
22,2,5265.9  
22,2,9870.165625  
22,2,5818.3088235294  
22,2,6324.7916666668  
22,2,5766.6341463414

22,2,5623.7886904762  
22,2,6336.1005434782  
22,2,6138.8076923077  
22,2,6869.2166666667  
22,2,5698.7016129031  
22,2,8305.2690217391  
22,2,6644.1363636363  
22,2,5485.7978723405  
22,2,7177.0372340425  
22,2,6534.1011904762  
22,2,5099.8125  
22,2,7711.7092391306  
22,2,6588.5625  
22,2,6898.5784883719  
22,2,6186.8940217393  
22,2,10177.1315789475  
22,2,6121.3671875  
22,2,6040.2305555555  
22,2,8370.0771276596  
22,2,8390.0803571428  
22,2,9447.0172413792  
22,2,5795.3392857142  
22,2,6270.4879807693  
22,2,11423.3557692307  
22,2,6824.1047297296  
22,2,10574.2678571429  
22,2,5304.5052083332  
22,2,5167.65625  
22,2,7373.9759615384  
22,2,12589.1317567568  
22,2,6375.8536585365  
22,2,5766.5425531915  
22,2,6911.7261904762  
22,2,8430.6646341464  
22,2,10419.7000000002  
22,2,7110.6693548387  
22,2,5775.29  
22,2,6578.8727272728  
22,2,9443.4281914893  
22,2,5055.6551724137  
22,2,7325.8974358974  
22,2,5716.4438775511  
22,2,10533.5975609755  
22,2,7521.3109756097  
22,2,9436.4947916666  
22,2,8272.8918918919  
22,2,6372.6465517242  
22,2,6008.25625  
22,2,8692.6  
22,2,5715.8676470588  
22,2,7245.1941489361  
22,2,6551.0857142857  
22,2,5657.4891304348  
22,2,6479.5  
22,2,10648.8378378379  
22,2,7877.8970588236  
22,2,8974.8648648648  
22,2,13012.5887096774  
22,2,7681.7407407408  
22,2,5616.4460227274  
22,2,6838.0510204083  
22,2,6340.0673076923  
22,2,7263.9418604652  
22,2,7044.2058823528
