# Supplementary material for: Selective Moonlighting Cell-Penetrating Peptides
Source: Pharmaceutics. 2021 Jul 22;13(8):1119. doi: 10.3390/pharmaceutics13081119 (PMC8400200; doi:10.3390/pharmaceutics13081119)
Supplement: Supplementary file 1 [file pharmaceutics-13-01119-s001.zip › TableS3.pdf]

Supplemental Data for the work entitled "Selective Moonlighting Cell-Penetrating Peptides" by Rafael Morán-Torres, David A. Castillo González, Beatriz Aguilar Maldonado, Maria Luisa Durán-Pastén, Susana Castro-Obregon & Gabriel Del Rio

Table S3. Median values of normalized fluorescence intensity for activatable peptides

|               |             | Peptide |             |
|---------------|-------------|---------|-------------|
| Peptide       | Cell line   | TatNep  | TatNepNoCPP |
| TatNep        | HEK293T     |         | 2.8         |
|               | HEK293T-NEP |         | 2.4         |
|               | HeLa        |         | 3.7         |
| TatNepNoCPP   | HEK293T     | 2.4     |             |
|               | HEK293T-NEP | 1.6     |             |
|               | HeLa        | 3.5     |             |
| D-TatNepNoCPP | HEK293T     | 2.8     | 7.1         |
|               | HEK293T-NEP | 1.6     | 2.7         |
|               | HeLa        | 1.9     | 7.0         |
